# Supplementary material for: Dual RNA-Seq Analysis Pinpoints to a BalancedRegulation between Symbiosis and Immunity in the Medicago truncatula-Sinorhizobium meliloti Symbiotic Interactions
Source: Preprints.org preprint supplement (doi:10.20944/preprints202309.0662.v1), 2023-09-11
Supplement: Supplementary file 1 [file supplementary]

## Sheet: 6 dpi
Table S1: Annotated list of plant genes that are differentially expressed in nad1-1 nodules relative to wild type nodules.
We considered plant genes to be differentially expressed if the log2-fold change relative to wild type nodules was greater than 1 and if the adjusted P-Value was below 0.05.
Table legend: 'NA' means data not available
Gene ID（Mt20120830-LIPM)	Gene ID (Mt4.0v1-JCVI )	Gene Name	WT-1 (CPM)	WT-2 (CPM)	WT-3 (CPM)	nad1-1-1 (CPM)	nad1-1-2 (CPM)	nad1-1-3(CPM)	WT_mean	nad1-1_mean	log2(fc)	PValue	FDR	COG_category	Description	Preferred_name	GOs	KEGG_ko
Mt0008_10844	Medtr5g072340		3.64	4.26	3.74	64.46	84.88	101.84	3.88	83.7267	4.4316	2.13e-79	2.5e-75	T	Belongs to the disease resistance NB-LRR family	-	-	ko:K15078
Mt0028_10087	Medtr8g018520		1.17	2.44	2.3	190.18	66.06	94.58	1.97	116.94	5.8914	1.94e-46	1.14e-42	E	Plant lipoxygenase may be involved in a number of diverse aspects of plant physiology including growth and development, pest resistance, and senescence or responses to wounding	LOX2	-	ko:K00454,ko:K15718
Mt0057_00085	Medtr1g105755		7.89	9.85	10.83	47.51	55.06	59.48	9.52333	54.0167	2.5039	5.92e-45	2.98e-41	T	Cysteine-rich receptor-like protein kinase	-	GO:0000166,GO:0001101,GO:0003674,GO:0003824,GO:0004672,GO:0004674,GO:0005488,GO:0005524,GO:0005575,GO:0005622,GO:0005623,GO:0005737,GO:0005773,GO:0005886,GO:0006464,GO:0006468,GO:0006793,GO:0006796,GO:0006807,GO:0008144,GO:0008150,GO:0008152,GO:0009719,GO:0009725,GO:0009737,GO:0009987,GO:0010033,GO:0016020,GO:0016021,GO:0016301,GO:0016310,GO:0016740,GO:0016772,GO:0016773,GO:0017076,GO:0019538,GO:…	ko:K04733
Mt0001_10552	Medtr4g124050		76.2	88.02	81.34	209.96	206.74	191.98	81.8533	202.893	1.3096	1.41e-42	6.21e-39	Q	ABC transporter B family member	-	GO:0000166,GO:0003674,GO:0003824,GO:0005215,GO:0005488,GO:0005524,GO:0005575,GO:0005623,GO:0005886,GO:0005911,GO:0006810,GO:0008144,GO:0008150,GO:0009506,GO:0009914,GO:0009926,GO:0009966,GO:0010315,GO:0010329,GO:0010540,GO:0010646,GO:0010817,GO:0010928,GO:0015399,GO:0015405,GO:0015562,GO:0016020,GO:0016021,GO:0016462,GO:0016787,GO:0016817,GO:0016818,GO:0016887,GO:0017076,GO:0017111,GO:0022804,GO:…	ko:K05658
Mt0005_00884	Medtr5g022850		2.64	4	3.51	29.11	20.01	28.1	3.38333	25.74	2.9275	8.99e-39	3.41e-35	-	-	-	-	-
Mt0014_10109	Medtr4g033830	NCR	27.72	32.15	33.38	5.35	6.64	6.87	31.0833	6.28667	-2.3058	1.55e-38	4.97e-35	#N/A	#N/A	#N/A	#N/A	#N/A
Mt0048_00119	Medtr2g073520		6.79	7.7	9.62	29.81	31.27	30.95	8.03667	30.6767	1.9325	5.53e-35	1.5e-31	T	leucine-rich repeat receptor-like serine threonine-protein kinase	-	GO:0000166,GO:0002376,GO:0002682,GO:0003674,GO:0003824,GO:0004672,GO:0004674,GO:0005488,GO:0005524,GO:0005575,GO:0005623,GO:0005886,GO:0005911,GO:0006464,GO:0006468,GO:0006793,GO:0006796,GO:0006807,GO:0006950,GO:0006952,GO:0006955,GO:0008144,GO:0008150,GO:0008152,GO:0009506,GO:0009605,GO:0009607,GO:0009611,GO:0009814,GO:0009861,GO:0009987,GO:0016020,GO:0016021,GO:0016301,GO:0016310,GO:0016740,GO:…	-
Mt0001_11173	Medtr4g107830		3.64	4.33	5.12	17.08	17.45	16.75	4.36333	17.0933	1.9699	1.06e-34	2.66e-31	C	Hypersensitive-induced response protein	-	GO:0003674,GO:0005488,GO:0005515,GO:0005575,GO:0005622,GO:0005623,GO:0005737,GO:0005773,GO:0005774,GO:0005794,GO:0005886,GO:0005911,GO:0009506,GO:0012505,GO:0016020,GO:0019899,GO:0019900,GO:0019901,GO:0030054,GO:0031090,GO:0043226,GO:0043227,GO:0043229,GO:0043231,GO:0043424,GO:0044422,GO:0044424,GO:0044437,GO:0044444,GO:0044446,GO:0044464,GO:0055044,GO:0071944,GO:0098588,GO:0098805	-
Mt0001_10762	Medtr4g118350		5.52	5.58	5.19	17.97	18.57	19.94	5.43	18.8267	1.7938	1.79e-33	4.21e-30	T	Pyruvate phosphate dikinase	-	GO:0000166,GO:0003674,GO:0003824,GO:0005488,GO:0005524,GO:0005575,GO:0005622,GO:0005623,GO:0005634,GO:0005737,GO:0005829,GO:0006082,GO:0006090,GO:0006793,GO:0006796,GO:0008144,GO:0008150,GO:0008152,GO:0009507,GO:0009532,GO:0009536,GO:0009570,GO:0009987,GO:0015979,GO:0016301,GO:0016310,GO:0016740,GO:0016772,GO:0016781,GO:0017076,GO:0019752,GO:0030554,GO:0032553,GO:0032555,GO:0032559,GO:0032787,GO:…	ko:K01006
Mt0035_00113	Medtr7g022640		42.2	39.65	44.25	3.85	6.73	5.54	42.0333	5.37333	-2.9676	2.06e-33	4.54e-30	#N/A	#N/A	#N/A	#N/A	#N/A
Mt0025_00008	Medtr6g004880		3.53	3.2	1.81	77.84	34.57	57.26	2.84667	56.5567	4.3124	3.2e-33	6.62e-30	S	galactinol--sucrose galactosyltransferase	-	GO:0001101,GO:0003674,GO:0003824,GO:0005575,GO:0005622,GO:0005623,GO:0005737,GO:0005975,GO:0006950,GO:0006979,GO:0008150,GO:0008152,GO:0008378,GO:0009414,GO:0009415,GO:0009507,GO:0009536,GO:0009628,GO:0009719,GO:0009725,GO:0009737,GO:0010033,GO:0010035,GO:0016740,GO:0016757,GO:0016758,GO:0033993,GO:0042221,GO:0043226,GO:0043227,GO:0043229,GO:0043231,GO:0044238,GO:0044424,GO:0044444,GO:0044464,GO:…	ko:K06617
Mt0016_00252	Medtr2g100340		26.9	25.67	26.56	8.71	6.89	8.23	26.3767	7.94333	-1.7314	9.31e-33	1.82e-29	S	Inorganic pyrophosphatase	-	-	ko:K06124,ko:K13248
Mt0015_00320	Medtr8g012585		1.1	1.12	1.31	8.62	6.7	8.89	1.17667	8.07	2.7779	8.64e-32	1.6e-28	Q	Cytochrome p450	-	GO:0003674,GO:0003824,GO:0004497,GO:0005488,GO:0005506,GO:0005575,GO:0006629,GO:0006720,GO:0006721,GO:0006950,GO:0006952,GO:0008150,GO:0008152,GO:0008299,GO:0008610,GO:0009058,GO:0009987,GO:0010035,GO:0010038,GO:0010039,GO:0016020,GO:0016021,GO:0016114,GO:0016491,GO:0016705,GO:0016709,GO:0019748,GO:0020037,GO:0031224,GO:0042214,GO:0042221,GO:0043167,GO:0043169,GO:0044237,GO:0044238,GO:0044249,GO:…	ko:K17961
Mt0012_10297	Medtr7g110180	Mtlb	400.23	430.81	427.73	61.44	68.66	95.51	419.59	75.2033	-2.4801	1.37e-30	2.3e-27	C	Belongs to the globin family	-	GO:0003674,GO:0005344,GO:0005488,GO:0006082,GO:0006629,GO:0006631,GO:0006638,GO:0006639,GO:0006641,GO:0006810,GO:0008144,GO:0008150,GO:0008152,GO:0008610,GO:0009058,GO:0009877,GO:0009987,GO:0015669,GO:0015671,GO:0015893,GO:0019432,GO:0019752,GO:0019825,GO:0020037,GO:0032787,GO:0036094,GO:0042221,GO:0042493,GO:0043167,GO:0043169,GO:0043436,GO:0044237,GO:0044238,GO:0044249,GO:0044255,GO:0044281,GO:…	ko:K21893
Mt0003_00663	Medtr4g065080		1.1	0.73	1.12	10.28	7.44	11.38	0.983333	9.7	3.3022	2.02e-30	3.23e-27	T	Belongs to the protein kinase superfamily	-	GO:0000003,GO:0000166,GO:0003006,GO:0003674,GO:0003824,GO:0004672,GO:0004674,GO:0005488,GO:0005515,GO:0005524,GO:0005575,GO:0005622,GO:0005623,GO:0005634,GO:0005737,GO:0005886,GO:0006464,GO:0006468,GO:0006793,GO:0006796,GO:0006807,GO:0006950,GO:0006952,GO:0006979,GO:0007154,GO:0007165,GO:0007275,GO:0008134,GO:0008144,GO:0008150,GO:0008152,GO:0009611,GO:0009791,GO:0009888,GO:0009908,GO:0009987,GO:…	-
Mt0006_10908	Medtr3g069830	NCR236-TC40754	7.96	8.43	8.11	0.58	1.12	1.03	8.16667	0.91	-3.1658	5.92e-29	8.69e-26	#N/A	#N/A	#N/A	#N/A	#N/A
Mt0080_00034	Medtr7g037690	NCR	15.34	16.59	16.61	3.72	3.34	4.64	16.18	3.9	-2.0527	3.61e-28	4.7e-25	#N/A	#N/A	#N/A	#N/A	#N/A
Mt0213_00004	Medtr0111s0050		21.68	22.37	23.41	6.46	6.16	7.7	22.4867	6.77333	-1.7311	5.21e-28	6.56e-25	#N/A	#N/A	#N/A	#N/A	#N/A
Mt0006_00214	Medtr3g084910	NCR193-TC34601	32.08	43.68	37.88	5.02	6.93	7.6	37.88	6.51667	-2.5392	1.62e-27	1.97e-24	#N/A	#N/A	#N/A	#N/A	#N/A
Mt0050_10183	Medtr1g053970		2.37	2.64	2.4	10.83	8.56	10.15	2.47	9.84667	1.9951	1.99e-27	2.33e-24	S	18 kDa seed maturation	-	GO:0000003,GO:0001101,GO:0003006,GO:0005575,GO:0005622,GO:0005623,GO:0005737,GO:0005829,GO:0006950,GO:0006970,GO:0007275,GO:0008150,GO:0009266,GO:0009409,GO:0009414,GO:0009415,GO:0009628,GO:0009790,GO:0009791,GO:0009793,GO:0010035,GO:0010154,GO:0022414,GO:0032501,GO:0032502,GO:0042221,GO:0044424,GO:0044444,GO:0044464,GO:0048316,GO:0048608,GO:0048731,GO:0048856,GO:0050896,GO:0061458,GO:1901700	-
Mt0185_00007	Medtr4g046850	NCR	8.34	9.09	10.57	1.78	1.83	2.22	9.33333	1.94333	-2.2639	2.41e-26	2.72e-23	#N/A	#N/A	#N/A	#N/A	#N/A
Mt0056_00076	Medtr2g044330	NCR238-TC29155	196.03	207.42	207.3	27.14	31.97	45.95	203.583	35.02	-2.5394	2.47e-26	2.72e-23	#N/A	#N/A	#N/A	#N/A	#N/A
Mt0025_00066	Medtr6g006245	NCR245-TC29401	26.18	24.78	28.82	6.49	7.41	8.39	26.5933	7.43	-1.8396	2.27e-25	2.42e-22	#N/A	#N/A	#N/A	#N/A	#N/A
Mt0117_10006	Medtr0888s0020	NCR	61.62	67.24	74.29	21.69	20.59	25.61	67.7167	22.63	-1.5813	5.99e-25	6.02e-22	#N/A	#N/A	#N/A	#N/A	#N/A
Mt0025_00078	Medtr6g006500	NCR	7.82	11	8.7	1.02	1.48	1.49	9.17333	1.33	-2.786	1.76e-24	1.68e-21	#N/A	#N/A	#N/A	#N/A	#N/A
Mt0010_10133	Medtr5g080400		272.78	304.36	306.53	95.9	95.34	117	294.557	102.747	-1.5195	1.98e-24	1.83e-21	C	Belongs to the globin family	-	GO:0003674,GO:0005344,GO:0005488,GO:0006082,GO:0006629,GO:0006631,GO:0006638,GO:0006639,GO:0006641,GO:0006810,GO:0008144,GO:0008150,GO:0008152,GO:0008610,GO:0009058,GO:0009877,GO:0009987,GO:0015669,GO:0015671,GO:0015893,GO:0019432,GO:0019752,GO:0019825,GO:0020037,GO:0032787,GO:0036094,GO:0042221,GO:0042493,GO:0043167,GO:0043169,GO:0043436,GO:0044237,GO:0044238,GO:0044249,GO:0044255,GO:0044281,GO:…	ko:K21893
Mt0101_00044	Medtr2g035755	NCR	13.31	11.07	11.46	2.46	2.47	3.05	11.9467	2.66	-2.1671	4.28e-24	3.87e-21	#N/A	#N/A	#N/A	#N/A	#N/A
Mt0002_10177	Medtr5g080900	MtLb1	370.93	450.56	405.74	64	72.79	103.1	409.077	79.9633	-2.355	5.35e-24	4.71e-21	C	Belongs to the globin family	-	GO:0003674,GO:0005344,GO:0005488,GO:0006082,GO:0006629,GO:0006631,GO:0006638,GO:0006639,GO:0006641,GO:0006810,GO:0008144,GO:0008150,GO:0008152,GO:0008610,GO:0009058,GO:0009877,GO:0009987,GO:0015669,GO:0015671,GO:0015893,GO:0019432,GO:0019752,GO:0019825,GO:0020037,GO:0032787,GO:0036094,GO:0042221,GO:0042493,GO:0043167,GO:0043169,GO:0043436,GO:0044237,GO:0044238,GO:0044249,GO:0044255,GO:0044281,GO:…	ko:K21893
Mt0024_20015	Medtr0240s0020		9.16	6.94	8.7	1.29	0.87	1.46	8.26667	1.20667	-2.7763	1.6e-23	1.35e-20	#N/A	#N/A	#N/A	#N/A	#N/A
Mt0024_00349	Medtr6g091605	NCR	14.58	16.82	16.18	1.35	1.06	2.52	15.86	1.64333	-3.2707	1.6e-23	1.35e-20	#N/A	#N/A	#N/A	#N/A	#N/A
Mt0001_00546	Medtr4g123940		3.22	2.64	1.41	22.71	17.7	21.96	2.42333	20.79	3.1008	1.76e-23	1.44e-20	T	Non-specific serine threonine protein kinase	CIPK17	GO:0000166,GO:0003674,GO:0003824,GO:0004672,GO:0004674,GO:0005488,GO:0005524,GO:0005575,GO:0005622,GO:0005623,GO:0005634,GO:0005737,GO:0006464,GO:0006468,GO:0006793,GO:0006796,GO:0006807,GO:0007154,GO:0007165,GO:0008144,GO:0008150,GO:0008152,GO:0009987,GO:0016301,GO:0016310,GO:0016740,GO:0016772,GO:0016773,GO:0017076,GO:0018105,GO:0018107,GO:0018193,GO:0018209,GO:0018210,GO:0019538,GO:0023052,GO:…	ko:K07198
Mt0009_00957	Medtr1526s0010		0.1	0	0.1	4.98	8.59	7.33	0.0666667	6.96667	6.7074	1.91e-23	1.53e-20	#N/A	#N/A	#N/A	#N/A	#N/A
Mt0006_11015	Medtr3g067615	0	0	0	0.2	5.66	6.67	5.24	0.0666667	5.85667	6.457	3.01e-23	2.36e-20	S	F-box LRR-repeat protein	-	GO:0005575,GO:0005622,GO:0005623,GO:0005634,GO:0006464,GO:0006807,GO:0008150,GO:0008152,GO:0009987,GO:0016567,GO:0019538,GO:0032446,GO:0036211,GO:0043170,GO:0043226,GO:0043227,GO:0043229,GO:0043231,GO:0043412,GO:0044237,GO:0044238,GO:0044260,GO:0044267,GO:0044424,GO:0044464,GO:0070647,GO:0071704,GO:1901564	ko:K10268
Mt0057_00088	Medtr1g105750	0	0.99	1.32	0.72	6.58	8.59	9.22	1.01	8.13	3.0089	5.83e-23	4.47e-20	T	Cysteine-rich receptor-like protein kinase	-	GO:0000166,GO:0001101,GO:0003674,GO:0003824,GO:0004672,GO:0004674,GO:0005488,GO:0005524,GO:0005575,GO:0005622,GO:0005623,GO:0005737,GO:0005773,GO:0005886,GO:0006464,GO:0006468,GO:0006793,GO:0006796,GO:0006807,GO:0008144,GO:0008150,GO:0008152,GO:0009719,GO:0009725,GO:0009737,GO:0009987,GO:0010033,GO:0016020,GO:0016021,GO:0016301,GO:0016310,GO:0016740,GO:0016772,GO:0016773,GO:0017076,GO:0019538,GO:…	ko:K04733
Mt0011_00243	Medtr7g090270	0	0.03	0.07	0.1	6.06	15.94	7.46	0.0666667	9.82	7.2026	8.79e-23	6.59e-20	S	Plant protein 1589 of unknown function (A_thal_3526)	-	-	-
Mt0006_00008	Medtr3g089005	0	213.08	303.21	225.22	31.88	36.53	53.14	247.17	40.5167	-2.6089	1.39e-22	1.02e-19	S	Basic blue protein-like	-	GO:0000003,GO:0003006,GO:0003674,GO:0003824,GO:0005488,GO:0005575,GO:0005576,GO:0005623,GO:0005886,GO:0006091,GO:0007275,GO:0008150,GO:0008152,GO:0009055,GO:0009791,GO:0009856,GO:0009908,GO:0009987,GO:0016020,GO:0016491,GO:0022414,GO:0022900,GO:0031012,GO:0031224,GO:0031225,GO:0031226,GO:0032501,GO:0032502,GO:0043167,GO:0043169,GO:0044237,GO:0044421,GO:0044425,GO:0044459,GO:0044464,GO:0044706,GO:…	-
Mt0006_01160	Medtr3g063950	0	1.68	1.59	2	9.2	6.73	7.17	1.75667	7.7	2.132	1.47e-22	1.06e-19	S	Protein of unknown function (DUF1517)	-	-	-
Mt0025_10391	Medtr3g031320	NCR	43.3	48.57	45.01	4.98	5.58	9.52	45.6267	6.69333	-2.7691	2.22e-22	1.56e-19	#N/A	#N/A	#N/A	#N/A	#N/A
Mt0012_10007	Medtr5g048310	NCR	46.86	46.02	47.99	6.8	6.09	11.08	46.9567	7.99	-2.5551	3.52e-22	2.43e-19	#N/A	#N/A	#N/A	#N/A	#N/A
Mt0006_00551	Medtr3g077630		15.61	16.19	11.03	59.04	69.3	52.95	14.2767	60.43	2.0816	5.21e-22	3.53e-19	S	isoform X1	-	-	-
Mt0010_10327	Medtr5g084260	0	74.45	80.06	77.96	28.55	24.4	32.08	77.49	28.3433	-1.451	5.67e-22	3.77e-19	#N/A	#N/A	#N/A	#N/A	#N/A
Mt0022_10089	Medtr7g058640	0	3.33	3.4	3.81	13.81	9.97	11.15	3.51333	11.6433	1.7286	1.86e-21	1.21e-18	U	Belongs to the synaptobrevin family	-	GO:0000149,GO:0003674,GO:0005484,GO:0005488,GO:0005515,GO:0005575,GO:0005622,GO:0005623,GO:0005737,GO:0005768,GO:0005769,GO:0005886,GO:0006810,GO:0006887,GO:0006906,GO:0006996,GO:0008104,GO:0008150,GO:0009507,GO:0009536,GO:0009987,GO:0010008,GO:0012505,GO:0015031,GO:0015833,GO:0016020,GO:0016021,GO:0016043,GO:0016050,GO:0016192,GO:0031090,GO:0031201,GO:0031224,GO:0031410,GO:0031901,GO:0031982,GO:…	ko:K08511,ko:K08515
Mt0013_10063	Medtr3g062820	NCR	26.83	31.09	30.17	6.22	5.96	8.96	29.3633	7.04667	-2.059	2.53e-21	1.62e-18	#N/A	#N/A	#N/A	#N/A	#N/A
Mt0125_00033	Medtr8g461160		0.17	0.13	0.1	4.49	3.17	6.34	0.133333	4.66667	5.1293	3.43e-21	2.12e-18	V	Belongs to the serpin family	-	GO:0003674,GO:0004857,GO:0004866,GO:0004867,GO:0004869,GO:0005575,GO:0005576,GO:0005615,GO:0005622,GO:0005623,GO:0005737,GO:0008150,GO:0009892,GO:0010466,GO:0010605,GO:0010951,GO:0019222,GO:0030162,GO:0030234,GO:0030414,GO:0031323,GO:0031324,GO:0032268,GO:0032269,GO:0043086,GO:0044092,GO:0044421,GO:0044424,GO:0044464,GO:0045861,GO:0048046,GO:0048519,GO:0048523,GO:0050789,GO:0050790,GO:0050794,GO:…	ko:K13963
Mt0034_10149	Medtr8g467170	NCR104-TC38808	116.03	107.51	121.23	12.55	16.19	24.85	114.923	17.8633	-2.6856	3.89e-21	2.36e-18	#N/A	#N/A	#N/A	#N/A	#N/A
Mt0076_00031	Medtr5g024090		46.32	45.76	48.19	23.35	22.77	20.1	46.7567	22.0733	-1.0829	4.59e-21	2.74e-18	K	Glutamate-rich WD repeat-containing protein	-	-	ko:K14848
Mt0017_10476	Medtr3g015940	NCR	21.03	17.08	22.88	4.8	3.91	5.71	20.33	4.80667	-2.0805	5.11e-21	3e-18	#N/A	#N/A	#N/A	#N/A	#N/A
Mt0012_00576	Medtr5g035580		1.72	0.66	1.44	17.85	11.32	11.15	1.27333	13.44	3.3999	5.72e-21	3.3e-18	CG	Belongs to the UDP-glycosyltransferase family	UGT74B1	GO:0003674,GO:0003824,GO:0005575,GO:0005622,GO:0005623,GO:0005737,GO:0005829,GO:0006082,GO:0006520,GO:0006725,GO:0006790,GO:0006807,GO:0006950,GO:0006952,GO:0008150,GO:0008152,GO:0008194,GO:0009058,GO:0009072,GO:0009605,GO:0009607,GO:0009617,GO:0009696,GO:0009987,GO:0010029,GO:0010030,GO:0010817,GO:0016043,GO:0016143,GO:0016144,GO:0016740,GO:0016757,GO:0016758,GO:0016999,GO:0017144,GO:0018874,GO:…	ko:K11820,ko:K13691
Mt0005_00882	Medtr5g022810		0	0	0.2	6.34	4.14	5.24	0.0666667	5.24	6.2965	5.83e-21	3.31e-18	S	ribonuclease T2 activity	-	GO:0000323,GO:0003674,GO:0003676,GO:0003723,GO:0003824,GO:0004518,GO:0004519,GO:0004521,GO:0004540,GO:0005488,GO:0005575,GO:0005622,GO:0005623,GO:0005737,GO:0005764,GO:0005773,GO:0006139,GO:0006725,GO:0006807,GO:0008150,GO:0008152,GO:0009987,GO:0016070,GO:0016787,GO:0016788,GO:0016892,GO:0016894,GO:0033897,GO:0034641,GO:0043170,GO:0043226,GO:0043227,GO:0043229,GO:0043231,GO:0044237,GO:0044238,GO:…	ko:K01166,ko:K09584
Mt0054_00157	Medtr6g461990	NCR	16.98	15.13	21.6	1.54	1.86	3.18	17.9033	2.19333	-3.029	6.88e-21	3.85e-18	#N/A	#N/A	#N/A	#N/A	#N/A
Mt0177_00008	Medtr1g052005	NCR	73.9	67.4	73.86	13.97	13.05	21.07	71.72	16.03	-2.1616	4.05e-20	2.2e-17	#N/A	#N/A	#N/A	#N/A	#N/A
Mt0041_00154	Medtr4g089025		0.45	0.3	0.43	4.03	3.72	6.3	0.393333	4.68333	3.5737	1.38e-19	7.27e-17	Q	Cytochrome p450	-	GO:0003674,GO:0003824,GO:0004497,GO:0005488,GO:0005506,GO:0005575,GO:0005622,GO:0005623,GO:0005737,GO:0005783,GO:0005794,GO:0005911,GO:0006629,GO:0006720,GO:0006721,GO:0006722,GO:0006950,GO:0006952,GO:0008150,GO:0008152,GO:0009058,GO:0009506,GO:0009507,GO:0009536,GO:0009987,GO:0012505,GO:0016020,GO:0016021,GO:0016491,GO:0016705,GO:0016709,GO:0016829,GO:0019748,GO:0020037,GO:0030054,GO:0031224,GO:…	ko:K00512,ko:K07408,ko:K07418,ko:K11868
Mt0001_11793	Medtr4g094360		47.69	52.86	44.15	4.15	6.09	9.39	48.2333	6.54333	-2.8819	2.55e-19	1.32e-16	S	WAT1-related protein	-	GO:0003674,GO:0005215,GO:0005575,GO:0005622,GO:0005623,GO:0005737,GO:0005886,GO:0005887,GO:0005938,GO:0006810,GO:0007154,GO:0007165,GO:0008150,GO:0009719,GO:0009725,GO:0009733,GO:0009734,GO:0009755,GO:0009987,GO:0010033,GO:0016020,GO:0016021,GO:0022857,GO:0023052,GO:0031224,GO:0031226,GO:0032870,GO:0042221,GO:0044424,GO:0044425,GO:0044444,GO:0044459,GO:0044464,GO:0050789,GO:0050794,GO:0050896,GO:…	-
Mt0055_00158	Medtr2g036320		1.89	1.55	1.97	8.15	6.38	9.12	1.80333	7.88333	2.1281	2.72e-19	1.39e-16	S	Plant protein of unknown function	-	-	-
Mt0009_00417	Medtr8g093620		1.06	0.76	1.02	4.55	4.91	5.67	0.946667	5.04333	2.4134	3.98e-19	1.98e-16	-	-	-	-	-
Mt0154_10015	Medtr0003s0130	NCR	102.37	103.61	114.1	35.2	27.48	40.57	106.693	34.4167	-1.6323	4.8e-19	2.35e-16	#N/A	#N/A	#N/A	#N/A	#N/A
Mt0016_00567	Medtr2g091290		26.93	22.5	22.75	4	5.68	6.24	24.06	5.30667	-2.1808	4.87e-19	2.35e-16	S	FRIGIDA-like protein	-	-	ko:K10352
Mt0054_10186	Medtr6g461840	NCR	23.12	27.16	23.8	5.38	4.75	7.63	24.6933	5.92	-2.0605	6.94e-19	3.3e-16	#N/A	#N/A	#N/A	#N/A	#N/A
Mt0048_10025	Medtr2g076990		0.41	0.46	0.26	5.32	6.93	3.32	0.376667	5.19	3.7844	7.59e-19	3.57e-16	O	Mitochondrial chaperone BCS1	-	-	ko:K08900
Mt0002_10801	Medtr1g027050		4.56	4.59	5.19	15.72	12.25	11.88	4.78	13.2833	1.4745	7.91e-19	3.66e-16	T	receptor-like protein kinase	-	-	-
Mt0004_11141	Medtr1g073380		5.11	8.16	8.44	1.2	0.99	0.6	7.23667	0.93	-2.96	1.26e-18	5.69e-16	K	AT-rich interactive domain-containing protein	-	-	-
Mt0077_10063	Medtr2g069320		16.64	20.48	26.79	82.77	67.73	60.97	21.3033	70.49	1.7263	1.44e-18	6.42e-16	J	Elongation factor	-	-	ko:K03234
Mt0002_00773	Medtr1g025340		16.02	11.43	13.85	45.04	36.88	38.75	13.7667	40.2233	1.5469	2.98e-18	1.31e-15	S	Protein of unknown function (DUF668)	-	-	-
Mt0012_10250	Medtr5g042910		9.78	10.47	8.96	1.26	1.48	2.36	9.73667	1.7	-2.5179	4.5e-18	1.96e-15	S	Protein of unknown function (DUF1336)	-	-	-
Mt0021_00154	Medtr7g007490		0.07	0	0.03	9.85	4.49	8.49	0.0333333	7.61	7.8348	5.23e-18	2.25e-15	U	Mediates both low-affinity uptake and efflux of sugar across the membrane	-	GO:0000139,GO:0003674,GO:0005215,GO:0005575,GO:0005622,GO:0005623,GO:0005737,GO:0005794,GO:0005802,GO:0005886,GO:0005887,GO:0006810,GO:0008150,GO:0008515,GO:0008643,GO:0012505,GO:0012506,GO:0015144,GO:0015154,GO:0015157,GO:0015766,GO:0015770,GO:0015772,GO:0016020,GO:0016021,GO:0022857,GO:0030659,GO:0031090,GO:0031224,GO:0031226,GO:0031410,GO:0031982,GO:0031984,GO:0032588,GO:0034219,GO:0043226,GO:…	ko:K15382
Mt0002_11635	Medtr1g046020		41.58	34.89	36.57	12.09	12.54	14.56	37.68	13.0633	-1.5283	5.43e-18	2.31e-15	#N/A	#N/A	#N/A	#N/A	#N/A
Mt0008_00897	Medtr5g072420	NCR	2.68	3.04	3.25	0.18	0.32	0.36	2.99	0.286667	-3.3827	8.41e-18	3.53e-15	#N/A	#N/A	#N/A	#N/A	#N/A
Mt0084_10025	Medtr6g445020	NCR	14.92	24.05	18.88	4.28	3.98	5.27	19.2833	4.51	-2.0962	1.16e-17	4.82e-15	#N/A	#N/A	#N/A	#N/A	#N/A
Mt0017_00075	Medtr3g006650	NCR	20.45	24.65	22.13	5.38	5.58	7.76	22.41	6.24	-1.8445	1.33e-17	5.45e-15	#N/A	#N/A	#N/A	#N/A	#N/A
Mt0111_00033	Medtr8g059170		3.16	2.08	3.22	12.25	20.24	14.56	2.82	15.6833	2.4755	1.37e-17	5.53e-15	K	NAC domain-containing protein	-	GO:0003674,GO:0003676,GO:0003677,GO:0005488,GO:0005575,GO:0005622,GO:0005623,GO:0005634,GO:0006139,GO:0006351,GO:0006355,GO:0006725,GO:0006807,GO:0008150,GO:0008152,GO:0009058,GO:0009059,GO:0009889,GO:0009987,GO:0010467,GO:0010468,GO:0010556,GO:0016070,GO:0018130,GO:0019219,GO:0019222,GO:0019438,GO:0031323,GO:0031326,GO:0032774,GO:0034641,GO:0034645,GO:0034654,GO:0043170,GO:0043226,GO:0043227,GO:…	-
Mt0002_00814	Medtr2g042050		23.78	23.69	24.85	6.52	7.6	9.16	24.1067	7.76	-1.6353	1.74e-17	6.87e-15	G	Belongs to the glycosyl hydrolase 13 family	-	GO:0000272,GO:0003674,GO:0003824,GO:0004553,GO:0004556,GO:0005488,GO:0005509,GO:0005575,GO:0005576,GO:0005622,GO:0005623,GO:0005737,GO:0005829,GO:0005975,GO:0005976,GO:0005982,GO:0005983,GO:0005984,GO:0005985,GO:0005987,GO:0006073,GO:0008150,GO:0008152,GO:0009056,GO:0009057,GO:0009251,GO:0009311,GO:0009313,GO:0009987,GO:0016052,GO:0016160,GO:0016787,GO:0016798,GO:0043167,GO:0043169,GO:0043170,GO:…	ko:K01176
Mt0011_00267	Medtr7g089670		0.48	0.26	0.43	7.63	3.08	6.97	0.39	5.89333	3.9175	1.91e-17	7.49e-15	S	f-box protein	-	-	-
Mt0153_10022	Medtr4g033290		52.83	52.86	61.81	22.25	23.51	25.74	55.8333	23.8333	-1.2281	2.08e-17	8.05e-15	#N/A	#N/A	#N/A	#N/A	#N/A
Mt0003_00738	Medtr4g068000		215.52	208.65	232.38	37.01	39.12	64.59	218.85	46.9067	-2.2221	2.91e-17	1.11e-14	K	RWP-RK domain	-	GO:0003674,GO:0003676,GO:0003677,GO:0003700,GO:0005488,GO:0005575,GO:0005622,GO:0005623,GO:0005634,GO:0006139,GO:0006351,GO:0006355,GO:0006725,GO:0006807,GO:0008150,GO:0008152,GO:0009058,GO:0009059,GO:0009889,GO:0009987,GO:0010467,GO:0010468,GO:0010556,GO:0016070,GO:0018130,GO:0019219,GO:0019222,GO:0019438,GO:0031323,GO:0031326,GO:0032774,GO:0034641,GO:0034645,GO:0034654,GO:0043170,GO:0043226,GO:…	-
Mt0035_10305	Medtr7g027060	NCR	2.92	5.58	3.22	0.09	0.03	0.2	3.90667	0.106667	-5.1948	3.66e-17	1.39e-14	#N/A	#N/A	#N/A	#N/A	#N/A
Mt0137_00014	Medtr2g041100		3.47	5.32	3.55	0.55	0.32	0.53	4.11333	0.466667	-3.1398	7.12e-17	2.64e-14	#N/A	#N/A	#N/A	#N/A	#N/A
Mt0013_10465	Medtr3g061750	NCR	16.19	13.98	15.53	2.34	3.17	4.21	15.2333	3.24	-2.2332	1.2e-16	4.36e-14	#N/A	#N/A	#N/A	#N/A	#N/A
Mt0003_01338	Medtr4g081530		6.93	6.57	8.76	17.97	17.25	16.95	7.42	17.39	1.2288	1.77e-16	6.37e-14	G	Belongs to the glycosyl hydrolase 1 family	-	GO:0003674,GO:0003824,GO:0004553,GO:0005575,GO:0005618,GO:0005623,GO:0005975,GO:0008150,GO:0008152,GO:0008422,GO:0009505,GO:0015926,GO:0016787,GO:0016798,GO:0030312,GO:0044238,GO:0044464,GO:0071704,GO:0071944,GO:0102483,GO:1901135,GO:1901657	ko:K01188
Mt0139_10026	Medtr1g055035	NCR	23.26	20.25	23.08	4.71	4.52	7.23	22.1967	5.48667	-2.0163	3.03e-16	1.07e-13	#N/A	#N/A	#N/A	#N/A	#N/A
Mt0008_00430	Medtr5g061825	NCR	7.79	6.77	8.31	1.11	1.6	1.96	7.62333	1.55667	-2.292	3.26e-16	1.14e-13	#N/A	#N/A	#N/A	#N/A	#N/A
Mt0008_10759	Medtr5g070870		13.04	13.08	11.42	39.94	27.8	31.48	12.5133	33.0733	1.4022	3.29e-16	1.14e-13	C	Belongs to the alternative oxidase family	-	GO:0003674,GO:0003824,GO:0005488,GO:0005575,GO:0005622,GO:0005623,GO:0005737,GO:0005739,GO:0005740,GO:0005743,GO:0008150,GO:0008152,GO:0009916,GO:0016020,GO:0016021,GO:0016491,GO:0016679,GO:0016682,GO:0019866,GO:0031090,GO:0031224,GO:0031966,GO:0031967,GO:0031975,GO:0043167,GO:0043169,GO:0043226,GO:0043227,GO:0043229,GO:0043231,GO:0044422,GO:0044424,GO:0044425,GO:0044429,GO:0044444,GO:0044446,GO:…	ko:K17893
Mt0008_10343	Medtr5g061120		18.59	15.69	21.63	3.08	2.15	4.58	18.6367	3.27	-2.5108	3.59e-16	1.23e-13	#N/A	#N/A	#N/A	#N/A	#N/A
Mt0027_00174	Medtr1g095850		0.62	0.5	1.02	14.12	5.32	6.73	0.713333	8.72333	3.6122	4.29e-16	1.45e-13	S	LOB domain-containing protein	-	-	-
Mt0093_00032	Medtr6g038320	NCR	6.66	6.71	7.06	2.03	1.6	2.32	6.81	1.98333	-1.7797	5.11e-16	1.71e-13	#N/A	#N/A	#N/A	#N/A	#N/A
Mt0002_01400	Medtr1g040175		0.58	0.59	0.69	4.49	3.01	3.18	0.62	3.56	2.5215	8.61e-16	2.83e-13	S	Benzyl alcohol	-	GO:0003674,GO:0003824,GO:0016740,GO:0016746,GO:0016747	ko:K19861
Mt0010_00186	Medtr5g081000	MtLb1	1255.28	1322.48	1309.19	372.42	402.91	534.99	1295.65	436.773	-1.5687	8.68e-16	2.83e-13	C	Belongs to the globin family	-	GO:0003674,GO:0005344,GO:0005488,GO:0006082,GO:0006629,GO:0006631,GO:0006638,GO:0006639,GO:0006641,GO:0006810,GO:0008144,GO:0008150,GO:0008152,GO:0008610,GO:0009058,GO:0009877,GO:0009987,GO:0015669,GO:0015671,GO:0015893,GO:0019432,GO:0019752,GO:0019825,GO:0020037,GO:0032787,GO:0036094,GO:0042221,GO:0042493,GO:0043167,GO:0043169,GO:0043436,GO:0044237,GO:0044238,GO:0044249,GO:0044255,GO:0044281,GO:…	ko:K21893
Mt0013_00226	Medtr3g031220		18.29	19.3	25.8	52.55	55.67	47.24	21.13	51.82	1.2942	1.63e-15	5.22e-13	K	WRKY transcription factor	WRKY25	GO:0001067,GO:0001101,GO:0003674,GO:0003676,GO:0003677,GO:0003700,GO:0005488,GO:0005575,GO:0005622,GO:0005623,GO:0005634,GO:0006139,GO:0006351,GO:0006355,GO:0006725,GO:0006790,GO:0006807,GO:0006950,GO:0006952,GO:0006970,GO:0008150,GO:0008152,GO:0009058,GO:0009059,GO:0009266,GO:0009403,GO:0009404,GO:0009408,GO:0009409,GO:0009414,GO:0009415,GO:0009605,GO:0009607,GO:0009617,GO:0009620,GO:0009628,GO:…	ko:K13423,ko:K13424
Mt0027_00300	Medtr1g092760		0.14	0.13	0.16	2.98	1.76	3.09	0.143333	2.61	4.1866	1.78e-15	5.58e-13	S	GDSL esterase lipase	-	-	-
Mt0038_00312	Medtr8g064070		2.4	3.73	2.69	0.25	0.32	0.33	2.94	0.3	-3.2928	1.79e-15	5.58e-13	#N/A	#N/A	#N/A	#N/A	#N/A
Mt0017_10468	Medtr3g015845		13.89	14.24	15.59	4	2.69	4.81	14.5733	3.83333	-1.9267	1.89e-15	5.84e-13	#N/A	#N/A	#N/A	#N/A	#N/A
Mt0012_00338	Medtr5g040970		0.27	0.43	1.08	6.89	7.31	14.13	0.593333	9.44333	3.9924	2.22e-15	6.81e-13	#N/A	#N/A	#N/A	#N/A	#N/A
Mt0008_10059	Medtr0021s0240		0.03	0	0.03	7.26	5.48	7.23	0.02	6.65667	8.3787	2.8e-15	8.5e-13	K	RNA polymerase II transcriptional coactivator	-	GO:0003674,GO:0003676,GO:0003677,GO:0003712,GO:0003713,GO:0005488,GO:0005575,GO:0005622,GO:0005623,GO:0005634,GO:0005667,GO:0006139,GO:0006351,GO:0006355,GO:0006357,GO:0006725,GO:0006807,GO:0008150,GO:0008152,GO:0009058,GO:0009059,GO:0009889,GO:0009891,GO:0009893,GO:0009987,GO:0010467,GO:0010468,GO:0010556,GO:0010557,GO:0010604,GO:0010628,GO:0016070,GO:0018130,GO:0019219,GO:0019222,GO:0019438,GO:…	-
Mt0074_10075	Medtr6g055160	NCR	108.07	100.71	107.21	23.6	25.43	38.22	105.33	29.0833	-1.8567	7.9e-15	2.36e-12	#N/A	#N/A	#N/A	#N/A	#N/A
Mt0034_00253	Medtr8g464730	NCR	78.36	73.71	70.58	16.74	16.26	26.27	74.2167	19.7567	-1.9094	9.21e-15	2.7e-12	#N/A	#N/A	#N/A	#N/A	#N/A
Mt0043_00198	Medtr3g028720		23.29	24.32	20.98	88.67	51.6	77.56	22.8633	72.61	1.6671	1.11e-14	3.2e-12	G	Belongs to the glycosyl hydrolase 1 family	-	GO:0003674,GO:0003824,GO:0004338,GO:0004553,GO:0004565,GO:0005575,GO:0005576,GO:0005975,GO:0006082,GO:0006790,GO:0006807,GO:0006950,GO:0006970,GO:0008150,GO:0008152,GO:0008422,GO:0009056,GO:0009628,GO:0009651,GO:0009719,GO:0009725,GO:0009987,GO:0010033,GO:0015925,GO:0015926,GO:0016143,GO:0016145,GO:0016787,GO:0016798,GO:0019137,GO:0019748,GO:0019757,GO:0019759,GO:0019760,GO:0019762,GO:0033907,GO:…	ko:K01188,ko:K01237
Mt0017_10146	Medtr3g008410		9.64	11.53	8.67	3.23	2.95	3.45	9.94667	3.21	-1.6316	1.19e-14	3.42e-12	#N/A	#N/A	#N/A	#N/A	#N/A
Mt0066_10077	Medtr8g033010	NCR	46.45	43.55	54.98	12.43	13.73	18.44	48.3267	14.8667	-1.7007	1.41e-14	3.98e-12	#N/A	#N/A	#N/A	#N/A	#N/A
Mt0037_10163	Medtr8g039130	NCR	115.82	99.62	128.38	18.86	21.77	35	114.607	25.21	-2.1846	1.5e-14	4.18e-12	#N/A	#N/A	#N/A	#N/A	#N/A
Mt0014_10607	Medtr4g022400		0	0.1	0.1	2.98	1.86	3.35	0.0666667	2.73	5.3558	1.52e-14	4.23e-12	S	F-box kelch-repeat protein	-	GO:0000151,GO:0003674,GO:0005488,GO:0005515,GO:0005575,GO:0005622,GO:0005623,GO:0005634,GO:0005737,GO:0006464,GO:0006508,GO:0006511,GO:0006807,GO:0008150,GO:0008152,GO:0009056,GO:0009057,GO:0009987,GO:0010498,GO:0016567,GO:0019005,GO:0019222,GO:0019538,GO:0019899,GO:0019941,GO:0030162,GO:0030163,GO:0031461,GO:0031625,GO:0032446,GO:0032991,GO:0036211,GO:0043161,GO:0043170,GO:0043226,GO:0043227,GO:…	-
Mt0003_10440	Medtr4g060730	NCR074= NCRa	11.56	14.93	21.73	0.55	2.15	1.06	16.0733	1.25333	-3.6808	1.59e-14	4.39e-12	#N/A	#N/A	#N/A	#N/A	#N/A
Mt0055_00154	Medtr2g036460		4.19	5.15	5.55	11.63	11.51	10.65	4.96333	11.2633	1.1823	1.63e-14	4.46e-12	T	Belongs to the protein kinase superfamily	-	GO:0000003,GO:0000166,GO:0003674,GO:0003824,GO:0004672,GO:0004674,GO:0005488,GO:0005515,GO:0005516,GO:0005524,GO:0005575,GO:0005623,GO:0005886,GO:0006464,GO:0006468,GO:0006793,GO:0006796,GO:0006807,GO:0007154,GO:0008037,GO:0008144,GO:0008150,GO:0008152,GO:0009856,GO:0009875,GO:0009987,GO:0016020,GO:0016021,GO:0016301,GO:0016310,GO:0016740,GO:0016772,GO:0016773,GO:0017076,GO:0019538,GO:0022414,GO:…	ko:K04733
Mt0050_10137	Medtr1g053640	NCR	75.89	74.97	78.09	16.31	16.16	26.9	76.3167	19.79	-1.9472	1.69e-14	4.58e-12	#N/A	#N/A	#N/A	#N/A	#N/A
Mt0003_00612	Medtr4g064830		34.79	34.96	36.9	16.31	15.71	18.68	35.55	16.9	-1.0728	1.84e-14	4.94e-12	-	-	-	-	-
Mt0054_00181	Medtr6g463320	NCR	46.28	51.81	50.42	9.63	8.79	16.19	49.5033	11.5367	-2.1013	1.85e-14	4.94e-12	#N/A	#N/A	#N/A	#N/A	#N/A
Mt0091_00076	Medtr3g436500		15.95	16.55	15.07	3.69	2.41	4.88	15.8567	3.66	-2.1152	2.57e-14	6.8e-12	#N/A	#N/A	#N/A	#N/A	#N/A
Mt0024_10311	Medtr6g088665		53.42	47.58	43.53	115.32	93.58	109.31	48.1767	106.07	1.1386	2.7e-14	7.09e-12	Q	Belongs to the iron ascorbate-dependent oxidoreductase family	-	GO:0000166,GO:0003674,GO:0003824,GO:0004672,GO:0004674,GO:0005488,GO:0005524,GO:0005575,GO:0005623,GO:0005886,GO:0006464,GO:0006468,GO:0006793,GO:0006796,GO:0006807,GO:0007275,GO:0008144,GO:0008150,GO:0008152,GO:0009653,GO:0009791,GO:0009987,GO:0010015,GO:0010101,GO:0010102,GO:0010468,GO:0016020,GO:0016021,GO:0016301,GO:0016310,GO:0016740,GO:0016772,GO:0016773,GO:0017076,GO:0019222,GO:0019538,GO:…	-
Mt0063_00044	Medtr5g076255		36.88	31.52	40.41	6.65	8.02	11.71	36.27	8.79333	-2.0443	2.79e-14	7.28e-12	#N/A	#N/A	#N/A	#N/A	#N/A
Mt0003_00809	Medtr2g055940		13	10.8	8.14	36.55	36.17	29.82	10.6467	34.18	1.6828	3.71e-14	9.55e-12	S	Belongs to the class I-like SAM-binding methyltransferase superfamily. Cation-independent O- methyltransferase family	-	GO:0003674,GO:0003824,GO:0005488,GO:0005515,GO:0006725,GO:0008150,GO:0008152,GO:0008168,GO:0008171,GO:0009058,GO:0009698,GO:0009699,GO:0009808,GO:0009809,GO:0009987,GO:0016740,GO:0016741,GO:0019438,GO:0019748,GO:0032259,GO:0044237,GO:0044249,GO:0044550,GO:0046983,GO:0047763,GO:0071704,GO:1901360,GO:1901362,GO:1901576	ko:K13066,ko:K21553
Mt0039_00222	Medtr1g086650		1.13	1.22	1.08	8.65	4.07	6.6	1.14333	6.44	2.4938	3.72e-14	9.55e-12	I	glycerol-3-phosphate acyltransferase	-	GO:0003674,GO:0003824,GO:0004366,GO:0005575,GO:0006139,GO:0006220,GO:0006221,GO:0006629,GO:0006644,GO:0006650,GO:0006725,GO:0006753,GO:0006793,GO:0006796,GO:0006807,GO:0008150,GO:0008152,GO:0008374,GO:0008610,GO:0008654,GO:0009058,GO:0009059,GO:0009117,GO:0009165,GO:0009987,GO:0010143,GO:0016020,GO:0016021,GO:0016024,GO:0016311,GO:0016740,GO:0016746,GO:0016747,GO:0016787,GO:0016788,GO:0016791,GO:…	ko:K13508
Mt0070_00114	Medtr0074s0060		0.41	0.3	0.53	2.74	2.57	2.32	0.413333	2.54333	2.6213	4.19e-14	1.07e-11	KLT	protein serine/threonine kinase activity	-	-	-
Mt0130_10020	Medtr0003s0180		180.66	176.53	184.39	58.4	56.44	80.18	180.527	65.0067	-1.4736	4.79e-14	1.21e-11	#N/A	#N/A	#N/A	#N/A	#N/A
Mt0025_00068	Medtr6g006275	NCR216-TC34461	57.67	58.25	59.12	20.89	21.39	27.6	58.3467	23.2933	-1.3247	5.51e-14	1.39e-11	#N/A	#N/A	#N/A	#N/A	#N/A
Mt0021_00330	Medtr7g011480	NCR	32.73	26.93	39.79	10.65	12.19	11.88	33.15	11.5733	-1.5182	7.26e-14	1.8e-11	#N/A	#N/A	#N/A	#N/A	#N/A
Mt0010_00934	Medtr5g095595	NCR	35.3	33.7	39.62	15.2	13.08	17.35	36.2067	15.21	-1.2512	1.14e-13	2.8e-11	#N/A	#N/A	#N/A	#N/A	#N/A
Mt0086_00043	Medtr7g063990	NCR	6.42	4.82	6.07	1.38	0.8	1.46	5.77	1.21333	-2.2496	1.38e-13	3.37e-11	#N/A	#N/A	#N/A	#N/A	#N/A
Mt0017_00062	Medtr3g006380	NCR	38.9	37.33	32.37	7.2	7.28	12.17	36.2	8.88333	-2.0268	1.41e-13	3.43e-11	#N/A	#N/A	#N/A	#N/A	#N/A
Mt0008_00899	Medtr5g072455	NCR100-TC32805	5.87	8.33	8.04	1.26	0.77	1.82	7.41333	1.28333	-2.5302	1.53e-13	3.69e-11	#N/A	#N/A	#N/A	#N/A	#N/A
Mt0005_00885	Medtr3g096562		1.65	1.29	1.87	4.89	5.29	5.31	1.60333	5.16333	1.6872	1.77e-13	4.25e-11	A	Methyltransferase-like protein	-	-	-
Mt0002_00866	Medtr1g027460		4.08	5.19	4.69	10.95	14.08	11.81	4.65333	12.28	1.4	1.87e-13	4.45e-11	T	receptor-like protein kinase	-	-	-
Mt0085_10024	Medtr7g027960		0.07	0.17	0.07	10.95	1.96	3.58	0.103333	5.49667	5.7332	1.97e-13	4.66e-11	Q	Belongs to the cytochrome P450 family	-	GO:0003674,GO:0003824,GO:0004497,GO:0005488,GO:0005506,GO:0005575,GO:0005622,GO:0005623,GO:0005737,GO:0005783,GO:0005789,GO:0006725,GO:0008150,GO:0008152,GO:0009058,GO:0009698,GO:0009699,GO:0009717,GO:0009987,GO:0012505,GO:0016020,GO:0016021,GO:0016491,GO:0016705,GO:0016709,GO:0018130,GO:0019438,GO:0019748,GO:0020037,GO:0031090,GO:0031224,GO:0031984,GO:0033770,GO:0033771,GO:0042175,GO:0043167,GO:…	ko:K00512,ko:K07408,ko:K13257
Mt0088_10045	Medtr7g016440	NCR	26.49	22.6	28.89	5.91	7.41	9.39	25.9933	7.57	-1.7798	2.1e-13	4.92e-11	#N/A	#N/A	#N/A	#N/A	#N/A
Mt0056_10131	Medtr2g042510		107.59	107.97	105.04	51.47	43.26	55.93	106.867	50.22	-1.0895	2.14e-13	4.98e-11	#N/A	#N/A	#N/A	#N/A	#N/A
Mt0004_00520	Medtr1g061110	NCR	34.86	28.35	28.72	6	7.31	10.28	30.6433	7.86333	-1.9624	2.42e-13	5.62e-11	#N/A	#N/A	#N/A	#N/A	#N/A
Mt0025_00062	Medtr6g006220	NCR	3.43	3.47	4.07	0.98	0.74	1	3.65667	0.906667	-2.0119	3.14e-13	7.19e-11	#N/A	#N/A	#N/A	#N/A	#N/A
Mt0008_00261	Medtr5g057460	NCR	47.52	42.03	51.96	10.95	14.33	17.55	47.17	14.2767	-1.7242	3.65e-13	8.29e-11	#N/A	#N/A	#N/A	#N/A	#N/A
Mt0007_00481	Medtr3g098350		3.67	3.04	4.17	41.14	12.22	26.41	3.62667	26.59	2.8742	4.76e-13	1.07e-10	PQ	Respiratory burst oxidase homolog protein	-	-	ko:K13447
Mt0003_00263	Medtr4g057120	NCR	6.93	5.85	7.16	1.66	1.6	2.32	6.64667	1.86	-1.8373	4.91e-13	1.1e-10	#N/A	#N/A	#N/A	#N/A	#N/A
Mt0054_10215	Medtr6g463200	NCR001-TC35566	502.64	531.51	528.05	177.65	174.9	244.46	520.733	199.003	-1.3878	5.06e-13	1.13e-10	#N/A	#N/A	#N/A	#N/A	#N/A
Mt0086_10080	Medtr7g065015		53.28	51.71	62.3	16.58	20.3	23.69	55.7633	20.19	-1.4657	5.22e-13	1.16e-10	#N/A	#N/A	#N/A	#N/A	#N/A
Mt0005_00236	Medtr5g009800		0.38	0.36	0.3	2.98	1.83	2.92	0.346667	2.57667	2.8939	5.35e-13	1.18e-10	P	cation H( ) antiporter	-	GO:0003674,GO:0005215,GO:0005575,GO:0005622,GO:0005623,GO:0005737,GO:0005768,GO:0005770,GO:0006810,GO:0006811,GO:0006812,GO:0006813,GO:0006885,GO:0008150,GO:0008324,GO:0012505,GO:0015075,GO:0015077,GO:0015078,GO:0015291,GO:0015297,GO:0015298,GO:0015299,GO:0015318,GO:0015672,GO:0016020,GO:0016021,GO:0022804,GO:0022857,GO:0022890,GO:0030001,GO:0031224,GO:0031410,GO:0031982,GO:0034220,GO:0042592,GO:…	-
Mt0084_10027	Medtr6g445080	NCR	539.62	536.07	573.41	209.28	225.82	275.64	549.7	236.913	-1.2143	6.36e-13	1.38e-10	#N/A	#N/A	#N/A	#N/A	#N/A
Mt0065_00006	Medtr6g043650	NCR069-TC42901	56.44	47.41	56.72	14.28	17.67	21.36	53.5233	17.77	-1.5907	7.4e-13	1.59e-10	#N/A	#N/A	#N/A	#N/A	#N/A
Mt0025_00291	Medtr6g011860		1.68	6.08	5.25	56.64	26.3	34.8	4.33667	39.2467	3.1779	8.3e-13	1.77e-10	K	No apical meristem (NAM) protein	-	GO:0003674,GO:0003676,GO:0003677,GO:0003700,GO:0005488,GO:0005575,GO:0005622,GO:0005623,GO:0005634,GO:0006139,GO:0006351,GO:0006355,GO:0006725,GO:0006807,GO:0007275,GO:0008150,GO:0008152,GO:0009058,GO:0009059,GO:0009719,GO:0009725,GO:0009733,GO:0009786,GO:0009889,GO:0009987,GO:0010033,GO:0010467,GO:0010468,GO:0010556,GO:0016070,GO:0017145,GO:0018130,GO:0019219,GO:0019222,GO:0019438,GO:0022622,GO:…	-
Mt0030_10205	Medtr3g436100		0.07	0.23	0.33	7.02	1.86	5.47	0.21	4.78333	4.5096	8.37e-13	1.78e-10	DTZ	GTPase activator activity	-	-	ko:K12486
Mt0008_10385	Medtr5g062240		1.61	0.99	1.15	5.94	4.17	5.87	1.25	5.32667	2.0913	8.76e-13	1.84e-10	#N/A	#N/A	#N/A	#N/A	#N/A
Mt0012_00349	Medtr5g040770		8.37	9.58	9.75	26.74	17.7	25.01	9.23333	23.15	1.3261	1.37e-12	2.86e-10	T	Belongs to the disease resistance NB-LRR family	-	GO:0000166,GO:0003674,GO:0005488,GO:0005524,GO:0006950,GO:0006952,GO:0008144,GO:0008150,GO:0017076,GO:0030554,GO:0032553,GO:0032555,GO:0032559,GO:0035639,GO:0036094,GO:0043167,GO:0043168,GO:0043531,GO:0050896,GO:0097159,GO:0097367,GO:1901265,GO:1901363	ko:K15078,ko:K19613
Mt0006_10103	Medtr3g087900		10.6	10.57	8.27	21.78	21.65	23.35	9.81333	22.26	1.1816	1.63e-12	3.38e-10	O	E3 ubiquitin-protein ligase	-	GO:0001101,GO:0003674,GO:0003824,GO:0004842,GO:0005488,GO:0005575,GO:0005622,GO:0005623,GO:0005634,GO:0005737,GO:0006464,GO:0006508,GO:0006511,GO:0006807,GO:0006950,GO:0006970,GO:0007154,GO:0007165,GO:0008150,GO:0008152,GO:0009056,GO:0009057,GO:0009628,GO:0009651,GO:0009719,GO:0009725,GO:0009737,GO:0009738,GO:0009755,GO:0009787,GO:0009789,GO:0009966,GO:0009967,GO:0009987,GO:0010033,GO:0010498,GO:…	ko:K16282
Mt0069_10023	Medtr3g005750		29.44	30.3	32.4	9.17	6.29	11.68	30.7133	9.04667	-1.7634	1.67e-12	3.44e-10	B	Belongs to the class I-like SAM-binding methyltransferase superfamily. C5-methyltransferase family	-	GO:0003674,GO:0003676,GO:0003677,GO:0003682,GO:0003824,GO:0003886,GO:0005488,GO:0005575,GO:0005622,GO:0005623,GO:0005634,GO:0006139,GO:0006259,GO:0006304,GO:0006305,GO:0006306,GO:0006325,GO:0006351,GO:0006355,GO:0006725,GO:0006807,GO:0006950,GO:0006996,GO:0008150,GO:0008152,GO:0008168,GO:0008757,GO:0009008,GO:0009058,GO:0009059,GO:0009266,GO:0009408,GO:0009628,GO:0009889,GO:0009987,GO:0010426,GO:…	ko:K00558
Mt0095_10013	Medtr2g018670		13	11.23	9.95	25.01	24.79	26.11	11.3933	25.3033	1.1511	2.07e-12	4.24e-10	-	-	-	-	-
Mt0252_10002	Medtr0192s0050	NCR	7.55	6.11	7.12	0.8	1.12	1.86	6.92667	1.26	-2.4587	2.65e-12	5.32e-10	#N/A	#N/A	#N/A	#N/A	#N/A
Mt0050_10147	Medtr6g090485		193.43	167.97	201.95	46.83	44.41	73.78	187.783	55.0067	-1.7714	2.71e-12	5.43e-10	#N/A	#N/A	#N/A	#N/A	#N/A
Mt0056_00127	Medtr2g043120		0.96	0.56	0.98	6	3.27	6.67	0.833333	5.31333	2.6727	2.91e-12	5.8e-10	#N/A	#N/A	#N/A	#N/A	#N/A
Mt0003_00744	Medtr4g068220		10.98	13.58	15.79	38.95	26.78	34.83	13.45	33.52	1.3174	3.74e-12	7.4e-10	-	-	-	-	-
Mt0065_10036	Medtr3g041540		3.5	2.68	2.82	0.71	0.51	0.6	3	0.606667	-2.306	4.56e-12	8.89e-10	#N/A	#N/A	#N/A	#N/A	#N/A
Mt0011_10632	Medtr7g081780		9.67	9.02	7.16	20.8	26.26	21.36	8.61667	22.8067	1.4043	4.63e-12	8.96e-10	T	LRR receptor-like serine threonine-protein kinase	-	GO:0000166,GO:0003674,GO:0003824,GO:0004672,GO:0004674,GO:0005488,GO:0005524,GO:0005575,GO:0006464,GO:0006468,GO:0006793,GO:0006796,GO:0006807,GO:0008144,GO:0008150,GO:0008152,GO:0009987,GO:0016020,GO:0016021,GO:0016301,GO:0016310,GO:0016740,GO:0016772,GO:0016773,GO:0017076,GO:0019538,GO:0030554,GO:0031224,GO:0032553,GO:0032555,GO:0032559,GO:0035639,GO:0036094,GO:0036211,GO:0043167,GO:0043168,GO:…	ko:K04730
Mt0021_00196	Medtr7g008090	NCR	10.33	10.54	10.93	3.66	3.91	4.88	10.6	4.15	-1.3529	5.59e-12	1.08e-09	#N/A	#N/A	#N/A	#N/A	#N/A
Mt0003_01633	Medtr4g088255	NCR116-TC34696	77.88	66.71	80.59	23.75	25.72	33.7	75.06	27.7233	-1.4369	6.1e-12	1.16e-09	#N/A	#N/A	#N/A	#N/A	#N/A
Mt0099_10008	Medtr6g466410	NCR150-TC35985	88.55	91.16	104.49	23.75	23.22	38.35	94.7333	28.44	-1.736	6.27e-12	1.19e-09	#N/A	#N/A	#N/A	#N/A	#N/A
Mt0008_00429	Medtr5g061800	NCR089-TC36530	316.62	311.04	328.46	100.49	87.58	141.95	318.707	110.007	-1.5346	6.91e-12	1.29e-09	#N/A	#N/A	#N/A	#N/A	#N/A
Mt0041_10210	Medtr4g091610		0.79	0.83	1.28	23.85	8.27	5.11	0.966667	12.41	3.6823	8.19e-12	1.52e-09	G	Belongs to the glycosyl hydrolase 5 (cellulase A) family	-	-	ko:K01179
Mt0008_00416	Medtr5g061550		1.13	1.45	1.28	4.83	6.19	3.81	1.28667	4.94333	1.9418	8.77e-12	1.62e-09	#N/A	#N/A	#N/A	#N/A	#N/A
Mt0037_10165	Medtr8g039090		3.09	2.84	4.07	10.46	11.16	7.73	3.33333	9.78333	1.5534	9.88e-12	1.81e-09	S	NADPH quinone	-	GO:0000166,GO:0003674,GO:0003824,GO:0003955,GO:0005488,GO:0005575,GO:0005622,GO:0005623,GO:0005737,GO:0005829,GO:0005886,GO:0006950,GO:0006952,GO:0006970,GO:0008150,GO:0008152,GO:0009507,GO:0009532,GO:0009536,GO:0009570,GO:0009605,GO:0009607,GO:0009617,GO:0009628,GO:0009651,GO:0009719,GO:0009725,GO:0009735,GO:0010033,GO:0010181,GO:0016020,GO:0016491,GO:0016645,GO:0016646,GO:0016651,GO:0016655,GO:…	ko:K19784
Mt0071_00033	Medtr1g041915	NCR	16.57	16.69	18.88	4.4	4.84	7.13	17.38	5.45667	-1.6713	1.03e-11	1.87e-09	#N/A	#N/A	#N/A	#N/A	#N/A
Mt0138_10003	Medtr6g478080		6.14	6.34	3.41	18.52	18.02	22.26	5.29667	19.6	1.8877	1.11e-11	2e-09	S	ADP binding	-	-	ko:K19613
Mt0005_10839	Medtr5g022870		1.06	1.88	1.94	5.32	5.77	5.21	1.62667	5.43333	1.7399	1.19e-11	2.14e-09	Q	Removal of H(2)O(2), oxidation of toxic reductants, biosynthesis and degradation of lignin, suberization, auxin catabolism, response to environmental stresses such as wounding, pathogen attack and oxidative stress	-	GO:0003674,GO:0003824,GO:0004601,GO:0005488,GO:0005575,GO:0005576,GO:0005618,GO:0005623,GO:0005911,GO:0006950,GO:0006979,GO:0008150,GO:0008152,GO:0009056,GO:0009505,GO:0009506,GO:0009636,GO:0009664,GO:0009987,GO:0016043,GO:0016209,GO:0016491,GO:0016684,GO:0016999,GO:0017001,GO:0017144,GO:0020037,GO:0030054,GO:0030312,GO:0042221,GO:0042737,GO:0042743,GO:0042744,GO:0043167,GO:0043169,GO:0044237,GO:…	ko:K00430
Mt0014_10679	Medtr4g021027		2.4	1.75	2.82	13.23	7.54	7.7	2.32333	9.49	2.0302	1.27e-11	2.26e-09	T	TMV resistance protein N-like	-	GO:0000166,GO:0002376,GO:0003674,GO:0005488,GO:0005524,GO:0005575,GO:0005622,GO:0005623,GO:0005737,GO:0006950,GO:0006952,GO:0006955,GO:0007154,GO:0007165,GO:0008144,GO:0008150,GO:0008219,GO:0009626,GO:0009987,GO:0012501,GO:0017076,GO:0023052,GO:0030554,GO:0032553,GO:0032555,GO:0032559,GO:0033554,GO:0034050,GO:0035639,GO:0036094,GO:0043167,GO:0043168,GO:0043531,GO:0044424,GO:0044464,GO:0045087,GO:…	-
Mt0043_00030	Medtr7g096450		2.95	3.47	3.41	1.05	0.83	0.73	3.27667	0.87	-1.9131	1.3e-11	2.31e-09	IQ	viral capsid secondary envelopment	IST1	GO:0003674,GO:0005575,GO:0005622,GO:0005623,GO:0005737,GO:0005768,GO:0006508,GO:0006511,GO:0006807,GO:0006810,GO:0006886,GO:0007034,GO:0008104,GO:0008150,GO:0008152,GO:0009056,GO:0009057,GO:0009987,GO:0012505,GO:0015031,GO:0015833,GO:0016192,GO:0016197,GO:0019538,GO:0019941,GO:0030163,GO:0031410,GO:0031982,GO:0032509,GO:0032511,GO:0033036,GO:0033365,GO:0034613,GO:0042886,GO:0043162,GO:0043170,GO:…	ko:K03453,ko:K19476
Mt0002_10800	Medtr1g027030		0.65	0.59	0.66	2.43	2.63	2.65	0.633333	2.57	2.0207	1.38e-11	2.44e-09	T	receptor-like protein kinase	-	-	-
Mt0048_00112	Medtr2g074990		7.93	8.69	9.62	33.35	18.05	26.11	8.74667	25.8367	1.5626	1.39e-11	2.45e-09	T	leucine-rich repeat receptor-like serine threonine-protein kinase	-	GO:0000166,GO:0002376,GO:0002682,GO:0003674,GO:0003824,GO:0004672,GO:0004674,GO:0005488,GO:0005524,GO:0005575,GO:0005623,GO:0005886,GO:0005911,GO:0006464,GO:0006468,GO:0006793,GO:0006796,GO:0006807,GO:0006950,GO:0006952,GO:0006955,GO:0008144,GO:0008150,GO:0008152,GO:0009506,GO:0009605,GO:0009607,GO:0009611,GO:0009814,GO:0009861,GO:0009987,GO:0016020,GO:0016021,GO:0016301,GO:0016310,GO:0016740,GO:…	-
Mt0039_10132	Medtr1g089000		1.03	0.79	1.21	4.52	3.94	3.09	1.01	3.85	1.9305	1.41e-11	2.46e-09	#N/A	#N/A	#N/A	#N/A	#N/A
Mt0034_10128	Medtr3g085653	NCR	5.83	7.4	7.45	1.78	1.31	2.42	6.89333	1.83667	-1.9081	1.52e-11	2.65e-09	#N/A	#N/A	#N/A	#N/A	#N/A
Mt0001_01785	Medtr4g094725		0.03	0.03	0	2.22	5.07	4.18	0.02	3.82333	7.5787	1.54e-11	2.67e-09	O	RING-H2 finger protein	-	GO:0000003,GO:0003006,GO:0003674,GO:0003824,GO:0004842,GO:0005488,GO:0005575,GO:0006464,GO:0006508,GO:0006511,GO:0006807,GO:0007275,GO:0008150,GO:0008152,GO:0009056,GO:0009057,GO:0009555,GO:0009791,GO:0009889,GO:0009900,GO:0009901,GO:0009908,GO:0009987,GO:0010498,GO:0010565,GO:0010817,GO:0016020,GO:0016021,GO:0016567,GO:0016740,GO:0019216,GO:0019217,GO:0019222,GO:0019538,GO:0019787,GO:0019941,GO:…	-
Mt0005_00133	Medtr5g007730		10.46	6.18	11.85	30.89	29.63	37.95	9.49667	32.8233	1.7892	1.8e-11	3.11e-09	H	Belongs to the chalcone stilbene synthases family	CHS3	GO:0003674,GO:0003824,GO:0008150,GO:0008152,GO:0009058,GO:0009812,GO:0009813,GO:0016210,GO:0016740,GO:0016746,GO:0016747,GO:0071704,GO:1901576	ko:K00660
Mt0012_10515	Medtr5g036270		3.02	5.35	3.25	0.22	0.32	0.66	3.87333	0.4	-3.2755	1.82e-11	3.13e-09	O	Belongs to the peptidase M10A family	-	-	-
Mt0055_00076	Medtr2g038675		1.75	1.75	1.61	0.09	0.22	0.07	1.70333	0.126667	-3.7493	1.96e-11	3.32e-09	#N/A	#N/A	#N/A	#N/A	#N/A
Mt0137_00012	Medtr2g041180		4.19	2.84	2.72	11.54	8.98	9.35	3.25	9.95667	1.6152	2e-11	3.37e-09	S	Plant protein of unknown function	-	-	-
Mt0134_10017	Medtr2g450150	NCR	16.88	15.33	17.5	2.74	2.57	5.41	16.57	3.57333	-2.2132	2.14e-11	3.6e-09	#N/A	#N/A	#N/A	#N/A	#N/A
Mt0013_00713	Medtr3g055520	MtCaML1 &3	100.73	103.91	108.43	30.18	27.03	45.45	104.357	34.22	-1.6086	2.17e-11	3.61e-09	#N/A	#N/A	#N/A	#N/A	#N/A
Mt0088_00051	Medtr7g016720		30.98	27.13	39.23	67.69	69.84	65.35	32.4467	67.6267	1.0595	2.32e-11	3.86e-09	H	Belongs to the chalcone stilbene synthases family	CHS3	GO:0003674,GO:0003824,GO:0008150,GO:0008152,GO:0009058,GO:0009812,GO:0009813,GO:0016210,GO:0016740,GO:0016746,GO:0016747,GO:0071704,GO:1901576	ko:K00660
Mt0012_00714	Medtr5g032465		15.71	15.96	14.08	4.31	4.75	6.5	15.25	5.18667	-1.5559	2.46e-11	4.07e-09	#N/A	#N/A	#N/A	#N/A	#N/A
Mt0087_00007	Medtr6g049260		1.85	1.55	1.25	4.65	4.62	5.01	1.55	4.76	1.6187	2.81e-11	4.63e-09	O	cellular transition metal ion homeostasis	-	-	-
Mt0043_10046	Medtr3g025295	NCR	4.15	4.89	4.2	1.6	1.48	1.39	4.41333	1.49	-1.5666	3.05e-11	4.99e-09	#N/A	#N/A	#N/A	#N/A	#N/A
Mt0001_01653	Medtr4g097570		3.64	3.17	2.99	17.01	7.95	14.03	3.26667	12.9967	1.9923	3.48e-11	5.67e-09	K	transcription factor	-	GO:0000981,GO:0000988,GO:0000989,GO:0001067,GO:0001076,GO:0001101,GO:0001134,GO:0001135,GO:0003674,GO:0003676,GO:0003677,GO:0003700,GO:0005488,GO:0005575,GO:0005622,GO:0005623,GO:0005634,GO:0006139,GO:0006351,GO:0006355,GO:0006357,GO:0006725,GO:0006807,GO:0007275,GO:0008150,GO:0008152,GO:0009058,GO:0009059,GO:0009719,GO:0009725,GO:0009751,GO:0009889,GO:0009987,GO:0010033,GO:0010467,GO:0010468,GO:…	ko:K09422
Mt0017_00158	Medtr3g008446	NCR	33.83	29.01	30.73	11.29	10.04	14.56	31.19	11.9633	-1.3825	3.73e-11	6.05e-09	#N/A	#N/A	#N/A	#N/A	#N/A
Mt0056_10051	Medtr2g044720		34.75	33.27	29.41	16.06	15.46	16.69	32.4767	16.07	-1.015	4.56e-11	7.36e-09	#N/A	#N/A	#N/A	#N/A	#N/A
Mt0019_00470	Medtr2g090235	ERF	1.85	2.44	2.2	6.34	4.87	5.51	2.16333	5.57333	1.3653	4.74e-11	7.59e-09	K	ethylene-responsive transcription factor	-	GO:0000160,GO:0003674,GO:0003676,GO:0003677,GO:0003700,GO:0005488,GO:0005575,GO:0005622,GO:0005623,GO:0005634,GO:0005737,GO:0006139,GO:0006351,GO:0006355,GO:0006725,GO:0006807,GO:0006950,GO:0006970,GO:0007154,GO:0007165,GO:0008150,GO:0008152,GO:0009058,GO:0009059,GO:0009628,GO:0009651,GO:0009719,GO:0009723,GO:0009725,GO:0009755,GO:0009873,GO:0009889,GO:0009891,GO:0009893,GO:0009987,GO:0010033,GO:…	-
Mt0035_10300	Medtr7g027125	NCR162-TC40326	87.21	98.82	88.17	26.25	19.31	36.89	91.4	27.4833	-1.7336	5.01e-11	7.98e-09	#N/A	#N/A	#N/A	#N/A	#N/A
Mt0003_00432	Medtr4g060610	NCR	80.28	67.96	72.91	32	34.09	38.08	73.7167	34.7233	-1.0861	6.88e-11	1.08e-08	#N/A	#N/A	#N/A	#N/A	#N/A
Mt0022_10204	Medtr7g056500		6.69	8.82	6.2	0.98	1.67	2.02	7.23667	1.55667	-2.2169	7.64e-11	1.19e-08	#N/A	#N/A	#N/A	#N/A	#N/A
Mt0006_00209	Medtr3g085020		3.77	3.07	2.95	7.97	7.15	7.93	3.26333	7.68333	1.2354	7.97e-11	1.23e-08	S	Protein of unknown function (DUF3339)	-	-	-
Mt0018_00545	Medtr2g437180		1.72	1.85	1.18	8.58	4.91	11.25	1.58333	8.24667	2.3808	8.01e-11	1.23e-08	S	termination of mitochondrial transcription	-	-	ko:K15032
Mt0003_10704	Medtr4g066630		12.08	11.5	9.42	22.25	26.2	24.58	11	24.3433	1.146	8.73e-11	1.33e-08	G	Belongs to the glycosyl hydrolase 1 family	-	GO:0003674,GO:0003824,GO:0004338,GO:0004553,GO:0004565,GO:0005575,GO:0005576,GO:0005975,GO:0006082,GO:0006790,GO:0006807,GO:0006950,GO:0006970,GO:0008150,GO:0008152,GO:0008422,GO:0009056,GO:0009628,GO:0009651,GO:0009719,GO:0009725,GO:0009987,GO:0010033,GO:0015925,GO:0015926,GO:0016143,GO:0016145,GO:0016787,GO:0016798,GO:0019137,GO:0019748,GO:0019757,GO:0019759,GO:0019760,GO:0019762,GO:0033907,GO:…	ko:K01188,ko:K01237
Mt0069_10047	Medtr2g054490	NCR	15.54	11.96	15.1	4.95	3.91	5.9	14.2	4.92	-1.5292	8.75e-11	1.33e-08	#N/A	#N/A	#N/A	#N/A	#N/A
Mt0018_10347	Medtr2g033080		1.27	0.69	1.25	4.49	3.53	4.84	1.07	4.28667	2.0022	9.16e-11	1.38e-08	#N/A	#N/A	#N/A	#N/A	#N/A
Mt0003_00551	Medtr4g063710		70.12	52.34	54.49	166.33	116.31	153.86	58.9833	145.5	1.3026	9.26e-11	1.39e-08	O	Belongs to the heat shock protein 70 family	-	GO:0000166,GO:0003674,GO:0005488,GO:0005524,GO:0008144,GO:0017076,GO:0030554,GO:0032553,GO:0032555,GO:0032559,GO:0035639,GO:0036094,GO:0043167,GO:0043168,GO:0097159,GO:0097367,GO:1901265,GO:1901363	ko:K03283
Mt0002_11750	Medtr3g030660		0.1	0.03	0.03	2.68	1.22	1.63	0.0533333	1.84333	5.1111	1e-10	1.5e-08	S	ribonuclease T2 activity	-	GO:0000323,GO:0003674,GO:0003676,GO:0003723,GO:0003824,GO:0004518,GO:0004519,GO:0004521,GO:0004540,GO:0005488,GO:0005575,GO:0005622,GO:0005623,GO:0005737,GO:0005764,GO:0005773,GO:0006139,GO:0006725,GO:0006807,GO:0008150,GO:0008152,GO:0009987,GO:0016070,GO:0016787,GO:0016788,GO:0016892,GO:0016894,GO:0033897,GO:0034641,GO:0043170,GO:0043226,GO:0043227,GO:0043229,GO:0043231,GO:0044237,GO:0044238,GO:…	ko:K01166,ko:K09584
Mt0069_10024	Medtr2g054830		9.64	11.1	12.77	2.95	3.17	4.61	11.17	3.57667	-1.6429	1.02e-10	1.52e-08	#N/A	#N/A	#N/A	#N/A	#N/A
Mt0085_10026	Medtr7g028020		1.72	2.25	1.97	57.47	7.12	20.97	1.98	28.52	3.8484	1.03e-10	1.52e-08	Q	Belongs to the cytochrome P450 family	-	GO:0003674,GO:0003824,GO:0004497,GO:0005488,GO:0005506,GO:0005575,GO:0005622,GO:0005623,GO:0005737,GO:0005783,GO:0005789,GO:0006725,GO:0008150,GO:0008152,GO:0009058,GO:0009698,GO:0009699,GO:0009717,GO:0009987,GO:0012505,GO:0016020,GO:0016021,GO:0016491,GO:0016705,GO:0016709,GO:0018130,GO:0019438,GO:0019748,GO:0020037,GO:0031090,GO:0031224,GO:0031984,GO:0033770,GO:0033771,GO:0042175,GO:0043167,GO:…	ko:K00512,ko:K07408,ko:K13257
Mt0009_00095	Medtr4g065077		4.29	3.14	4	10.03	16.77	20.73	3.81	15.8433	2.056	1.13e-10	1.67e-08	O	Belongs to the peptidase C1 family	-	-	-
Mt0002_01817	Medtr2g072660		26.31	29.27	36.21	10.06	8.95	13.6	30.5967	10.87	-1.493	1.15e-10	1.68e-08	#N/A	#N/A	#N/A	#N/A	#N/A
Mt0044_00047	Medtr7g034060	NCR202-TC41898	4.91	5.95	4.83	1.14	0.71	1.63	5.23	1.16	-2.1727	1.19e-10	1.72e-08	#N/A	#N/A	#N/A	#N/A	#N/A
Mt0001_01985	Medtr4g093080		26.45	24.22	23.41	47.32	66	66.48	24.6933	59.9333	1.2792	1.19e-10	1.72e-08	O	response to heat	-	-	ko:K13993
Mt0002_11501	Medtr1g042850	NCR	54.96	56.89	60.14	13.54	11.58	22.76	57.33	15.96	-1.8448	1.26e-10	1.82e-08	#N/A	#N/A	#N/A	#N/A	#N/A
Mt0008_10189	Medtr5g056185	NCR	151.88	149.57	162.62	54.15	38.26	68.3	154.69	53.57	-1.5299	1.29e-10	1.85e-08	#N/A	#N/A	#N/A	#N/A	#N/A
Mt0002_00458	Medtr1g017700		1.3	1.75	1.71	8.49	4.55	5.14	1.58667	6.06	1.9333	1.39e-10	1.99e-08	S	Phytosulfokines	-	-	-
Mt0039_00227	Medtr1g086585		0.62	0.66	0.95	2.8	4.78	3.28	0.743333	3.62	2.2839	1.47e-10	2.1e-08	K	DNA methyltransferase 1-associated protein	-	GO:0000122,GO:0000123,GO:0000228,GO:0000785,GO:0000790,GO:0000812,GO:0000981,GO:0001085,GO:0001103,GO:0003674,GO:0003676,GO:0003677,GO:0003700,GO:0003712,GO:0003714,GO:0005488,GO:0005515,GO:0005575,GO:0005622,GO:0005623,GO:0005634,GO:0005654,GO:0005657,GO:0005694,GO:0005737,GO:0005829,GO:0006139,GO:0006259,GO:0006281,GO:0006304,GO:0006305,GO:0006306,GO:0006325,GO:0006338,GO:0006351,GO:0006355,GO:…	ko:K11324
Mt0093_10046	Medtr6g038490		135.1	123.8	149.92	47.72	40.41	64.26	136.273	50.7967	-1.4237	1.64e-10	2.33e-08	#N/A	#N/A	#N/A	#N/A	#N/A
Mt0043_00038	Medtr3g025230		1.72	0.79	1.18	4.58	5.2	5.61	1.23	5.13	2.0603	1.73e-10	2.44e-08	Q	Belongs to the cytochrome P450 family	F3'H	GO:0003674,GO:0003824,GO:0004497,GO:0005488,GO:0005506,GO:0005575,GO:0005622,GO:0005623,GO:0005737,GO:0005783,GO:0005789,GO:0008150,GO:0008152,GO:0009058,GO:0009719,GO:0009725,GO:0009733,GO:0009812,GO:0009813,GO:0010033,GO:0012505,GO:0016020,GO:0016021,GO:0016491,GO:0016705,GO:0016709,GO:0016711,GO:0019748,GO:0020037,GO:0031224,GO:0031984,GO:0042175,GO:0042221,GO:0043167,GO:0043169,GO:0043226,GO:…	ko:K05280
Mt0053_00126	Medtr1g101120		0.58	0.66	0.98	33.97	3.66	8.53	0.74	15.3867	4.378	1.74e-10	2.45e-08	S	PAR1 protein	-	-	-
Mt0051_10067	Medtr3g449620		17.84	17.05	14.94	30.71	35.92	37.25	16.61	34.6267	1.0598	1.89e-10	2.64e-08	Q	Polyamine oxidase	-	GO:0003674,GO:0003824,GO:0005575,GO:0005622,GO:0005623,GO:0005737,GO:0005777,GO:0006576,GO:0006595,GO:0006598,GO:0006807,GO:0008150,GO:0008152,GO:0008215,GO:0009056,GO:0009308,GO:0009310,GO:0009987,GO:0016491,GO:0016645,GO:0016647,GO:0017144,GO:0034641,GO:0042402,GO:0042579,GO:0042737,GO:0043226,GO:0043227,GO:0043229,GO:0043231,GO:0044106,GO:0044237,GO:0044248,GO:0044424,GO:0044444,GO:0044464,GO:…	ko:K17839
Mt0022_00461	Medtr7g051290	NCR	11.97	9.12	14.44	3.97	3.4	4.48	11.8433	3.95	-1.5842	1.92e-10	2.67e-08	S	poly(A)-specific ribonuclease activity	-	GO:0000373,GO:0000375,GO:0000377,GO:0003674,GO:0003676,GO:0003723,GO:0005488,GO:0005575,GO:0005622,GO:0005623,GO:0005737,GO:0006139,GO:0006396,GO:0006397,GO:0006417,GO:0006725,GO:0006807,GO:0008150,GO:0008152,GO:0008380,GO:0009507,GO:0009532,GO:0009536,GO:0009570,GO:0009889,GO:0009987,GO:0010467,GO:0010468,GO:0010556,GO:0010608,GO:0016070,GO:0016071,GO:0019222,GO:0031323,GO:0031326,GO:0032268,GO:…	-
Mt0010_00302	Medtr5g083255	NCR052-TC31686	29.4	25.77	28.89	8.28	6.38	11.74	28.02	8.8	-1.6709	1.96e-10	2.72e-08	#N/A	#N/A	#N/A	#N/A	#N/A
Mt0013_00712	Medtr3g055585	MtCaML2	203.79	231.48	203.36	59.84	46.6	88.94	212.877	65.1267	-1.7087	2.06e-10	2.84e-08	#N/A	#N/A	#N/A	#N/A	#N/A
Mt0008_00739	Medtr5g069100	NCR	224.96	191.5	248.04	66.71	80.97	99.95	221.5	82.5433	-1.4241	2.12e-10	2.91e-08	#N/A	#N/A	#N/A	#N/A	#N/A
Mt0013_00700	Medtr3g455820		2.33	2.31	4.2	10.4	12.09	8.39	2.94667	10.2933	1.8046	2.23e-10	3.03e-08	S	ankyrin repeat-containing protein	-	GO:0003674,GO:0003676,GO:0003723,GO:0005198,GO:0005200,GO:0005488,GO:0005515,GO:0005575,GO:0005622,GO:0005623,GO:0005634,GO:0005681,GO:0005737,GO:0005783,GO:0005829,GO:0005856,GO:0005886,GO:0006139,GO:0006396,GO:0006397,GO:0006725,GO:0006807,GO:0006810,GO:0006887,GO:0006888,GO:0006996,GO:0007010,GO:0007154,GO:0007163,GO:0007165,GO:0008092,GO:0008093,GO:0008104,GO:0008150,GO:0008152,GO:0008380,GO:…	-
Mt0042_10217	Medtr6g074620		9.23	11.99	8.63	26.8	19.37	25.51	9.95	23.8933	1.2638	2.23e-10	3.03e-08	O	Toll - interleukin 1 - resistance	-	-	-
Mt0017_10230	Medtr0149s0080	NCR	13.59	12.06	15.56	4.15	4.17	6.04	13.7367	4.78667	-1.5209	2.33e-10	3.16e-08	#N/A	#N/A	#N/A	#N/A	#N/A
Mt0004_00517	Medtr1g061100	NCR	200.15	179.08	222.47	65.75	73.89	96.14	200.567	78.5933	-1.3516	2.4e-10	3.24e-08	#N/A	#N/A	#N/A	#N/A	#N/A
Mt0003_11601	Medtr4g087100	GA20ox	2.54	3.3	3.94	9.88	7.18	7.96	3.26	8.34	1.3552	2.49e-10	3.35e-08	Q	Belongs to the iron ascorbate-dependent oxidoreductase family	-	GO:0003674,GO:0003824,GO:0005488,GO:0005575,GO:0005622,GO:0005623,GO:0005737,GO:0008150,GO:0008152,GO:0009058,GO:0009812,GO:0009813,GO:0016491,GO:0016705,GO:0016706,GO:0016740,GO:0019842,GO:0030246,GO:0031406,GO:0031418,GO:0036094,GO:0043167,GO:0043168,GO:0043169,GO:0043177,GO:0044424,GO:0044464,GO:0045486,GO:0046872,GO:0048029,GO:0048037,GO:0050662,GO:0051213,GO:0055114,GO:0071704,GO:1901576	-
Mt0002_11840	Medtr1g049330	MtLB29	1103.61	983.43	1141.54	440.84	419.42	568.73	1076.19	476.33	-1.1759	2.58e-10	3.44e-08	C	Belongs to the globin family	-	GO:0003674,GO:0005344,GO:0005488,GO:0006082,GO:0006629,GO:0006631,GO:0006638,GO:0006639,GO:0006641,GO:0006810,GO:0008144,GO:0008150,GO:0008152,GO:0008610,GO:0009058,GO:0009877,GO:0009987,GO:0015669,GO:0015671,GO:0015893,GO:0019432,GO:0019752,GO:0019825,GO:0020037,GO:0032787,GO:0036094,GO:0042221,GO:0042493,GO:0043167,GO:0043169,GO:0043436,GO:0044237,GO:0044238,GO:0044249,GO:0044255,GO:0044281,GO:…	ko:K21893
Mt0010_00367	Medtr5g084770	GDSL esterase	19.08	16.12	20.09	5.2	4.55	7.76	18.43	5.83667	-1.6588	2.58e-10	3.44e-08	I	Belongs to the 'GDSL' lipolytic enzyme family	-	GO:0003674,GO:0003824,GO:0005575,GO:0005576,GO:0006629,GO:0008150,GO:0008152,GO:0009056,GO:0016042,GO:0016787,GO:0016788,GO:0044238,GO:0071704,GO:1901575	-
Mt0001_01277	Medtr4g105530		8.89	11.27	8.76	4.09	3.37	4.18	9.64	3.88	-1.313	3.02e-10	4e-08	#N/A	#N/A	#N/A	#N/A	#N/A
Mt0014_00055	Medtr6g462060	NCR	200.18	175.54	210.38	60.61	54.23	89.3	195.367	68.0467	-1.5216	3.18e-10	4.19e-08	#N/A	#N/A	#N/A	#N/A	#N/A
Mt0020_00409	Medtr8g079520		2.57	2.94	3.38	16.77	7.15	11.28	2.96333	11.7333	1.9853	3.19e-10	4.19e-08	S	disease resistance	-	GO:0000166,GO:0003674,GO:0005488,GO:0005524,GO:0006950,GO:0006952,GO:0008144,GO:0008150,GO:0017076,GO:0030554,GO:0032553,GO:0032555,GO:0032559,GO:0035639,GO:0036094,GO:0043167,GO:0043168,GO:0043531,GO:0050896,GO:0097159,GO:0097367,GO:1901265,GO:1901363	ko:K19613
Mt0085_00106	Medtr7g029165	NCR	2.61	2.25	2.76	0.62	0.48	0.7	2.54	0.6	-2.0818	3.22e-10	4.22e-08	#N/A	#N/A	#N/A	#N/A	#N/A
Mt0086_10110	Medtr7g065780		3.71	3.9	4.43	0.83	0.9	1.43	4.01333	1.05333	-1.9298	3.32e-10	4.33e-08	E	Ribonuclease H protein	-	-	ko:K03549
Mt0008_10721	Medtr5g069890		1.89	2.94	1.51	0.12	0.13	0.3	2.11333	0.183333	-3.527	3.52e-10	4.55e-08	#N/A	#N/A	#N/A	#N/A	#N/A
Mt0032_00154	Medtr6g046760		1.27	1.02	1.18	3.57	3.11	3.35	1.15667	3.34333	1.5313	4.08e-10	5.22e-08	T	Belongs to the disease resistance NB-LRR family	-	-	ko:K15078
Mt0014_00762	Medtr4g020520		2.4	1.52	2	11.6	5.61	7.4	1.97333	8.20333	2.0556	4.13e-10	5.28e-08	T	TMV resistance protein N-like	-	GO:0000166,GO:0002376,GO:0003674,GO:0005488,GO:0005524,GO:0005575,GO:0005622,GO:0005623,GO:0005737,GO:0006950,GO:0006952,GO:0006955,GO:0007154,GO:0007165,GO:0008144,GO:0008150,GO:0008219,GO:0009626,GO:0009987,GO:0012501,GO:0017076,GO:0023052,GO:0030554,GO:0032553,GO:0032555,GO:0032559,GO:0033554,GO:0034050,GO:0035639,GO:0036094,GO:0043167,GO:0043168,GO:0043531,GO:0044424,GO:0044464,GO:0045087,GO:…	-
Mt0038_00178	Medtr8g069277		11.01	11.56	9.82	28.18	22.8	39.05	10.7967	30.01	1.4749	4.47e-10	5.68e-08	#N/A	#N/A	#N/A	#N/A	#N/A
Mt0024_00282	Medtr6g088785		6.42	5.09	10.11	22.98	28.51	20.14	7.20667	23.8767	1.7282	4.57e-10	5.79e-08	T	Belongs to the protein kinase superfamily. Ser Thr protein kinase family	-	GO:0000166,GO:0003674,GO:0003824,GO:0004672,GO:0004674,GO:0005488,GO:0005524,GO:0005575,GO:0005623,GO:0005886,GO:0006464,GO:0006468,GO:0006793,GO:0006796,GO:0006807,GO:0007275,GO:0008144,GO:0008150,GO:0008152,GO:0009653,GO:0009791,GO:0009987,GO:0010015,GO:0010101,GO:0010102,GO:0010468,GO:0016020,GO:0016021,GO:0016301,GO:0016310,GO:0016740,GO:0016772,GO:0016773,GO:0017076,GO:0019222,GO:0019538,GO:…	ko:K00924
Mt0001_11664	Medtr4g094858		0.65	1.12	1.71	6.62	4.04	5.61	1.16	5.42333	2.2251	4.92e-10	6.2e-08	T	Receptor protein kinase	-	GO:0000003,GO:0000166,GO:0003674,GO:0003824,GO:0004672,GO:0004674,GO:0005488,GO:0005524,GO:0005575,GO:0006464,GO:0006468,GO:0006793,GO:0006796,GO:0006807,GO:0007154,GO:0008037,GO:0008144,GO:0008150,GO:0008152,GO:0009856,GO:0009875,GO:0009987,GO:0016020,GO:0016021,GO:0016301,GO:0016310,GO:0016740,GO:0016772,GO:0016773,GO:0017076,GO:0019538,GO:0022414,GO:0030554,GO:0031224,GO:0032501,GO:0032553,GO:…	-
Mt0041_10097	Medtr6g015750		1.68	1.59	1.02	4.74	4.23	5.64	1.43	4.87	1.7679	5.34e-10	6.66e-08	O	cellular transition metal ion homeostasis	-	-	ko:K07213
Mt0011_00467	Medtr7g085610		0.14	0.13	0.39	1.78	4.01	2.12	0.22	2.63667	3.5831	5.45e-10	6.76e-08	-	-	-	-	-
Mt0012_10005	Medtr5g048335		15.44	15.33	16.74	5.14	3.75	6.9	15.8367	5.26333	-1.5892	5.67e-10	7e-08	#N/A	#N/A	#N/A	#N/A	#N/A
Mt0016_00230	Medtr2g100710		106.39	119.34	120.44	52.12	48.42	64.99	115.39	55.1767	-1.0644	5.95e-10	7.33e-08	G	Catalyzes the phosphorylation of D-fructose 6-phosphate to fructose 1,6-bisphosphate by ATP, the first committing step of glycolysis	-	-	ko:K00850
Mt0088_10005	Medtr5g096930		0.69	0.93	1.48	5.17	4.23	3.32	1.03333	4.24	2.0368	5.99e-10	7.33e-08	S	FCP1 homology domain-containing protein C1271.03c-like	-	-	-
Mt0022_10035	Medtr7g060330		5.73	5.52	5.22	2.4	1.83	2.22	5.49	2.15	-1.3525	6.19e-10	7.54e-08	S	Plant protein of unknown function	-	-	-
Mt0005_10536	Medtr5g015810		2.37	7.5	3.05	0.55	0.19	0.23	4.30667	0.323333	-3.7355	6.67e-10	8.07e-08	S	N-acetyltransferase HLS1	-	GO:0000902,GO:0003674,GO:0003824,GO:0006464,GO:0006473,GO:0006807,GO:0007154,GO:0007165,GO:0007275,GO:0008080,GO:0008150,GO:0008152,GO:0009314,GO:0009416,GO:0009628,GO:0009639,GO:0009640,GO:0009653,GO:0009719,GO:0009723,GO:0009725,GO:0009733,GO:0009734,GO:0009755,GO:0009791,GO:0009826,GO:0009987,GO:0010033,GO:0016043,GO:0016049,GO:0016407,GO:0016410,GO:0016740,GO:0016746,GO:0016747,GO:0019538,GO:…	-
Mt0073_00104	Medtr1308s0010		1.89	0.93	1.51	6.52	4.39	6.87	1.44333	5.92667	2.0378	7.73e-10	9.32e-08	Q	flavin-containing monooxygenase	-	GO:0000166,GO:0001666,GO:0002218,GO:0002253,GO:0002376,GO:0002682,GO:0002684,GO:0003674,GO:0003824,GO:0004497,GO:0004499,GO:0005488,GO:0006950,GO:0006952,GO:0006955,GO:0007154,GO:0007165,GO:0008150,GO:0008152,GO:0008219,GO:0009605,GO:0009607,GO:0009617,GO:0009620,GO:0009626,GO:0009627,GO:0009628,GO:0009814,GO:0009870,GO:0009987,GO:0010204,GO:0012501,GO:0016491,GO:0016705,GO:0016709,GO:0023052,GO:…	ko:K00485
Mt0104_10031	Medtr7g117470		3.09	2.71	2.99	6.28	6.89	6	2.93	6.39	1.1249	8.28e-10	9.91e-08	S	BEST Arabidopsis thaliana protein match is	-	-	-
Mt0086_10100	Medtr7g065600		0.03	0.03	0.26	2.77	2.15	1.33	0.106667	2.08333	4.2877	8.87e-10	1.06e-07	O	glutathione transferase activity	-	-	ko:K00799
Mt0024_10120	Medtr6g084730	NCR191-TC31280	2.95	3.34	3.38	0.89	0.74	1.16	3.22333	0.93	-1.7933	9.8e-10	1.15e-07	#N/A	#N/A	#N/A	#N/A	#N/A
Mt0033_00224	Medtr8g012590		157.4	151.65	177.26	79.17	68.27	91.69	162.103	79.71	-1.0241	9.92e-10	1.16e-07	Q	Cytochrome p450	-	GO:0003674,GO:0003824,GO:0004497,GO:0005488,GO:0005506,GO:0005575,GO:0006629,GO:0006720,GO:0006721,GO:0006950,GO:0006952,GO:0008150,GO:0008152,GO:0008299,GO:0008610,GO:0009058,GO:0009987,GO:0010035,GO:0010038,GO:0010039,GO:0016020,GO:0016021,GO:0016114,GO:0016491,GO:0016705,GO:0016709,GO:0019748,GO:0020037,GO:0031224,GO:0042214,GO:0042221,GO:0043167,GO:0043169,GO:0044237,GO:0044238,GO:0044249,GO:…	ko:K17961
Mt0124_00021	Medtr6g464870		33.62	31.19	38.11	14.49	13.5	18.18	34.3067	15.39	-1.1565	1e-09	1.17e-07	#N/A	#N/A	#N/A	#N/A	#N/A
Mt0037_10148	Medtr8g038715	NCR	7.93	8.06	9.03	2.03	1.89	3.42	8.34	2.44667	-1.7692	1e-09	1.17e-07	#N/A	#N/A	#N/A	#N/A	#N/A
Mt0052_00065	Medtr6g477860		3.4	4.56	5.42	10.25	10.1	9.39	4.46	9.91333	1.1523	1.21e-09	1.4e-07	K	transcription, DNA-templated	EPR1	GO:0003674,GO:0003676,GO:0003677,GO:0003700,GO:0005488,GO:0005575,GO:0005622,GO:0005623,GO:0005634,GO:0006139,GO:0006351,GO:0006355,GO:0006725,GO:0006807,GO:0006950,GO:0006970,GO:0007623,GO:0008150,GO:0008152,GO:0009058,GO:0009059,GO:0009628,GO:0009651,GO:0009719,GO:0009723,GO:0009725,GO:0009889,GO:0009987,GO:0010033,GO:0010035,GO:0010038,GO:0010467,GO:0010468,GO:0010556,GO:0016070,GO:0018130,GO:…	-
Mt0008_10740	Medtr5g070330		0.21	0.2	0.3	4.31	1.99	1.36	0.236667	2.55333	3.4315	1.48e-09	1.68e-07	P	Belongs to the Ca(2 ) cation antiporter (CaCA) (TC 2.A.19) family	-	GO:0000325,GO:0003674,GO:0005215,GO:0005575,GO:0005622,GO:0005623,GO:0005737,GO:0005773,GO:0005774,GO:0006793,GO:0006810,GO:0006811,GO:0006812,GO:0006816,GO:0006873,GO:0006874,GO:0006875,GO:0006882,GO:0008150,GO:0008152,GO:0008324,GO:0009605,GO:0009607,GO:0009624,GO:0009705,GO:0009987,GO:0010035,GO:0010038,GO:0015075,GO:0015077,GO:0015078,GO:0015085,GO:0015291,GO:0015297,GO:0015298,GO:0015299,GO:…	ko:K07300
Mt0013_00116	Medtr3g467360		2.95	3.27	3.61	28.65	8.21	16.12	3.27667	17.66	2.4302	1.67e-09	1.89e-07	S	Senescence-associated carboxylesterase 101-like	-	-	-
Mt0050_00077	Medtr3g450650		0.03	0	0.07	2.09	1.25	1.36	0.0333333	1.56667	5.5546	1.72e-09	1.93e-07	#N/A	#N/A	#N/A	#N/A	#N/A
Mt0056_10024	Medtr2g045360		7	7.37	10.18	19.01	16.58	15.53	8.18333	17.04	1.0582	1.75e-09	1.96e-07	K	WRKY transcription factor	-	-	-
Mt0010_10191	Medtr5g081560		8.78	10.64	15	4.68	3.14	3.35	11.4733	3.72333	-1.6236	2.06e-09	2.28e-07	A	The RING-variant domain is a C4HC3 zinc-finger like motif found in a number of cellular and viral proteins. Some of these proteins have been shown both in vivo and in vitro to have ubiquitin E3 ligase activity.	-	-	-
Mt0093_10020	Medtr6g037900		12.32	14.21	14.44	6.92	5.52	7.27	13.6567	6.57	-1.0556	2.16e-09	2.38e-07	B	DNA (cytosine-5)-methyltransferase	CMT1	GO:0003674,GO:0003676,GO:0003677,GO:0003682,GO:0003824,GO:0003886,GO:0005488,GO:0005575,GO:0005622,GO:0005623,GO:0005634,GO:0006139,GO:0006259,GO:0006304,GO:0006305,GO:0006306,GO:0006325,GO:0006351,GO:0006355,GO:0006725,GO:0006807,GO:0006996,GO:0008150,GO:0008152,GO:0008168,GO:0008757,GO:0009008,GO:0009058,GO:0009059,GO:0009292,GO:0009294,GO:0009889,GO:0009987,GO:0010216,GO:0010467,GO:0010468,GO:…	ko:K00558
Mt0017_00639	Medtr3g021050	NCR	45.8	38.89	47.01	18.21	17.19	23.22	43.9	19.54	-1.1678	2.62e-09	2.84e-07	#N/A	#N/A	#N/A	#N/A	#N/A
Mt0050_10137	Medtr1g053625	NCR	17.05	15.17	17.23	4.74	2.63	6.1	16.4833	4.49	-1.8762	2.75e-09	2.97e-07	#N/A	#N/A	#N/A	#N/A	#N/A
Mt0011_00226	Medtr4g113480		1.3	1.42	1.25	0.03	0.1	0	1.32333	0.0433333	-4.9326	2.81e-09	3.02e-07	T	phosphatase 2c	-	GO:0003674,GO:0003824,GO:0004721,GO:0004722,GO:0005488,GO:0006464,GO:0006470,GO:0006793,GO:0006796,GO:0006807,GO:0008150,GO:0008152,GO:0009987,GO:0016311,GO:0016787,GO:0016788,GO:0016791,GO:0019538,GO:0036211,GO:0042578,GO:0043167,GO:0043169,GO:0043170,GO:0043412,GO:0044237,GO:0044238,GO:0044260,GO:0044267,GO:0046872,GO:0071704,GO:0140096,GO:1901564	ko:K01102
Mt0008_00334	Medtr5g459510	NCR	34.38	29.9	37.03	8.77	9.3	15.03	33.77	11.0333	-1.6139	2.92e-09	3.13e-07	#N/A	#N/A	#N/A	#N/A	#N/A
Mt0041_00258	Medtr4g092590		4.91	5.68	6.76	13.91	11.13	10.58	5.78333	11.8733	1.0378	2.93e-09	3.13e-07	E	Belongs to the class-IV pyridoxal-phosphate-dependent aminotransferase family	BCAT4	GO:0000096,GO:0000097,GO:0003674,GO:0003824,GO:0004084,GO:0005575,GO:0005622,GO:0005623,GO:0005737,GO:0005829,GO:0006082,GO:0006520,GO:0006549,GO:0006551,GO:0006555,GO:0006573,GO:0006790,GO:0006807,GO:0006950,GO:0008150,GO:0008152,GO:0008483,GO:0008652,GO:0009058,GO:0009066,GO:0009067,GO:0009081,GO:0009082,GO:0009086,GO:0009097,GO:0009098,GO:0009099,GO:0009314,GO:0009416,GO:0009611,GO:0009628,GO:…	ko:K00826,ko:K21346
Mt0129_10009	Medtr1g077360		0	0	0.03	7.23	0.99	2.39	0.01	3.53667	8.4662	3.04e-09	3.23e-07	K	Agamous-like MADS-box protein	-	GO:0000003,GO:0000976,GO:0000977,GO:0001012,GO:0001067,GO:0003006,GO:0003674,GO:0003676,GO:0003677,GO:0003690,GO:0003700,GO:0005488,GO:0005515,GO:0005575,GO:0005622,GO:0005623,GO:0005634,GO:0006139,GO:0006351,GO:0006355,GO:0006357,GO:0006725,GO:0006807,GO:0006996,GO:0007275,GO:0008150,GO:0008152,GO:0009058,GO:0009059,GO:0009553,GO:0009657,GO:0009658,GO:0009791,GO:0009888,GO:0009889,GO:0009891,GO:…	ko:K04454,ko:K09260
Mt0003_00556	Medtr4g063770	NCR	98.6	84.95	92.01	38.18	34.31	48.86	91.8533	40.45	-1.1832	3.04e-09	3.23e-07	#N/A	#N/A	#N/A	#N/A	#N/A
Mt0008_00398	Medtr5g061160	NCR	16.74	13.55	15.79	3.91	3.75	6.54	15.36	4.73333	-1.6982	3.25e-09	3.43e-07	#N/A	#N/A	#N/A	#N/A	#N/A
Mt0008_10256	Medtr5g058510	NCR	52.28	48.97	47.37	15.23	13.89	23.49	49.54	17.5367	-1.4982	3.71e-09	3.88e-07	#N/A	#N/A	#N/A	#N/A	#N/A
Mt0138_10012	Medtr6g057750		0.07	0.1	0.1	5.26	0.96	1.53	0.09	2.58333	4.8432	3.99e-09	4.16e-07	KLT	protein serine/threonine kinase activity	-	-	-
Mt0007_11059	Medtr3g109930		0	0	0.03	1.88	1.31	2.89	0.01	2.02667	7.663	4.03e-09	4.19e-07	K	transcription regulatory region sequence-specific DNA binding	-	-	ko:K12412
Mt0008_10574	Medtr5g066070		4599.9	4697.21	4373.47	1907.28	1869.39	2547.1	4556.86	2107.92	-1.1122	4.11e-09	4.25e-07	C	Belongs to the globin family	-	GO:0003674,GO:0005344,GO:0005488,GO:0006082,GO:0006629,GO:0006631,GO:0006638,GO:0006639,GO:0006641,GO:0006810,GO:0008144,GO:0008150,GO:0008152,GO:0008610,GO:0009058,GO:0009877,GO:0009987,GO:0015669,GO:0015671,GO:0015893,GO:0019432,GO:0019752,GO:0019825,GO:0020037,GO:0032787,GO:0036094,GO:0042221,GO:0042493,GO:0043167,GO:0043169,GO:0043436,GO:0044237,GO:0044238,GO:0044249,GO:0044255,GO:0044281,GO:…	ko:K21893
Mt0017_00635	Medtr3g020950	NCR AJ388787	49.27	45.26	52.16	21.51	17.54	26.14	48.8967	21.73	-1.17	4.12e-09	4.25e-07	#N/A	#N/A	#N/A	#N/A	#N/A
Mt0011_00460	Medtr7g085790		5.76	6.54	9.03	35.81	16.19	21.93	7.11	24.6433	1.7933	4.16e-09	4.29e-07	-	-	-	-	-
Mt0011_10306	Medtr7g088470		34.79	28.91	29.48	4.83	4.84	10.98	31.06	6.88333	-2.1739	4.27e-09	4.39e-07	G	Alpha-L-arabinofuranosidase	-	GO:0000272,GO:0003674,GO:0003824,GO:0004553,GO:0005575,GO:0005576,GO:0005618,GO:0005622,GO:0005623,GO:0005737,GO:0005773,GO:0005975,GO:0005976,GO:0005996,GO:0008150,GO:0008152,GO:0009044,GO:0009056,GO:0009057,GO:0009505,GO:0009987,GO:0010383,GO:0010410,GO:0016052,GO:0016787,GO:0016798,GO:0019321,GO:0019566,GO:0030312,GO:0043170,GO:0043226,GO:0043227,GO:0043229,GO:0043231,GO:0044036,GO:0044237,GO:…	ko:K01209
Mt0014_10127	Medtr4g035725	NCR	29.57	28.48	33.25	11.88	13.15	16.32	30.4333	13.7833	-1.1427	4.7e-09	4.8e-07	#N/A	#N/A	#N/A	#N/A	#N/A
Mt0004_10211	Medtr1g082600	NCR	5.45	4.69	8.24	1.69	1.25	1.99	6.12667	1.64333	-1.8985	4.71e-09	4.8e-07	#N/A	#N/A	#N/A	#N/A	#N/A
Mt0017_10469	Medtr3g015877	NCR087-TC29251	3.43	2.64	4.5	0.31	0.58	0.86	3.52333	0.583333	-2.5945	4.91e-09	4.97e-07	#N/A	#N/A	#N/A	#N/A	#N/A
Mt0038_00228	Medtr8g069800		0.07	0.07	0.03	1.05	2.05	1.09	0.0566667	1.39667	4.6233	5.17e-09	5.21e-07	S	F-box kelch-repeat protein	-	GO:0005575,GO:0005622,GO:0005623,GO:0005634,GO:0005737,GO:0005829,GO:0006508,GO:0006511,GO:0006807,GO:0008150,GO:0008152,GO:0009056,GO:0009057,GO:0009987,GO:0010498,GO:0019538,GO:0019941,GO:0030163,GO:0043161,GO:0043170,GO:0043226,GO:0043227,GO:0043229,GO:0043231,GO:0043632,GO:0044237,GO:0044238,GO:0044248,GO:0044257,GO:0044260,GO:0044265,GO:0044267,GO:0044424,GO:0044444,GO:0044464,GO:0051603,GO:…	-
Mt0064_10169	Medtr4g011500		23.88	24.02	24.49	7.85	8.4	12.17	24.13	9.47333	-1.3489	5.33e-09	5.35e-07	#N/A	#N/A	#N/A	#N/A	#N/A
Mt0031_10305	Medtr7g104130		11.63	11.5	12.77	41.57	21.07	35.03	11.9667	32.5567	1.4439	5.59e-09	5.6e-07	Q	Belongs to the ABC transporter superfamily. ABCG family. PDR (TC 3.A.1.205) subfamily	-	-	-
Mt0022_00247	Medtr7g066720		63.74	54.12	59.25	24.71	28.12	31.65	59.0367	28.16	-1.068	5.75e-09	5.74e-07	#N/A	#N/A	#N/A	#N/A	#N/A
Mt0006_00478	Medtr6g046330		1.44	1.85	1.41	5.11	3.53	4.25	1.56667	4.29667	1.4555	5.84e-09	5.8e-07	E	Plant lipoxygenase may be involved in a number of diverse aspects of plant physiology including growth and development, pest resistance, and senescence or responses to wounding	-	-	ko:K00454
Mt0130_10022	Medtr0003s0210		25.56	25.28	25.08	11.14	7.73	12.57	25.3067	10.48	-1.2719	5.84e-09	5.8e-07	#N/A	#N/A	#N/A	#N/A	#N/A
Mt0057_10013	Medtr1g107225		3.47	3.37	2.27	13.54	6.93	11.05	3.03667	10.5067	1.7907	6.06e-09	5.99e-07	S	Peptidase of plants and bacteria	-	-	-
Mt0016_10168	Medtr2g102267		0.62	0.23	0.82	9.14	2.57	4.54	0.556667	5.41667	3.2825	6.46e-09	6.34e-07	U	The coatomer is a cytosolic protein complex that binds to dilysine motifs and reversibly associates with Golgi non- clathrin-coated vesicles, which further mediate biosynthetic protein transport from the ER, via the Golgi up to the trans Golgi network. Coatomer complex is required for budding from Golgi membranes, and is essential for the retrograde Golgi-to-ER transport of dilysine-tagged protei…	-	GO:0000139,GO:0003674,GO:0005198,GO:0005575,GO:0005622,GO:0005623,GO:0005737,GO:0005794,GO:0005798,GO:0006810,GO:0006886,GO:0006888,GO:0006890,GO:0006891,GO:0008104,GO:0008150,GO:0012505,GO:0012506,GO:0015031,GO:0015833,GO:0016020,GO:0016192,GO:0030117,GO:0030120,GO:0030126,GO:0030135,GO:0030137,GO:0030659,GO:0030660,GO:0030662,GO:0030663,GO:0031090,GO:0031410,GO:0031982,GO:0031984,GO:0032991,GO:…	ko:K17302
Mt0020_00407	Medtr8g079450		5.04	4.89	4.2	9.94	15.59	11.64	4.71	12.39	1.3954	7.46e-09	7.26e-07	S	disease resistance	-	GO:0000166,GO:0003674,GO:0005488,GO:0005524,GO:0006950,GO:0006952,GO:0008144,GO:0008150,GO:0017076,GO:0030554,GO:0032553,GO:0032555,GO:0032559,GO:0035639,GO:0036094,GO:0043167,GO:0043168,GO:0043531,GO:0050896,GO:0097159,GO:0097367,GO:1901265,GO:1901363	ko:K19613
Mt0023_10049	Medtr2g015630		4.15	4.99	6.07	11.88	11.93	9.22	5.07	11.01	1.1188	7.56e-09	7.33e-07	S	Belongs to the 'GDSL' lipolytic enzyme family	-	GO:0003674,GO:0003824,GO:0005575,GO:0005576,GO:0005618,GO:0005622,GO:0005623,GO:0005737,GO:0005773,GO:0006629,GO:0008150,GO:0008152,GO:0009056,GO:0016042,GO:0016787,GO:0016788,GO:0030312,GO:0043226,GO:0043227,GO:0043229,GO:0043231,GO:0044238,GO:0044424,GO:0044444,GO:0044464,GO:0071704,GO:0071944,GO:1901575	ko:K21026
Mt0017_00272	Medtr3g009250		1.54	2.21	1.87	0.31	0.42	0.13	1.87333	0.286667	-2.7082	8.13e-09	7.86e-07	S	F-box kelch-repeat protein	-	GO:0003674,GO:0003824,GO:0004842,GO:0005575,GO:0005622,GO:0005623,GO:0005634,GO:0006464,GO:0006508,GO:0006511,GO:0006807,GO:0008150,GO:0008152,GO:0009056,GO:0009057,GO:0009987,GO:0010498,GO:0016567,GO:0016740,GO:0019538,GO:0019787,GO:0019941,GO:0030163,GO:0031146,GO:0032446,GO:0036211,GO:0043161,GO:0043170,GO:0043226,GO:0043227,GO:0043229,GO:0043231,GO:0043412,GO:0043632,GO:0044237,GO:0044238,GO:…	-
Mt0008_10198	Medtr5g056360	NCR	10.6	6.57	11.1	2.62	1.8	3.22	9.42333	2.54667	-1.8876	8.15e-09	7.86e-07	#N/A	#N/A	#N/A	#N/A	#N/A
Mt0135_00013	Medtr1g021470		11.53	13.65	14.54	5.75	4.65	6.8	13.24	5.73333	-1.2075	8.43e-09	8.12e-07	K	DNA-dependent RNA polymerase catalyzes the transcription of DNA into RNA using the four ribonucleoside triphosphates as substrates	-	GO:0000428,GO:0000959,GO:0003674,GO:0003676,GO:0003677,GO:0003824,GO:0003899,GO:0005488,GO:0005575,GO:0005622,GO:0005623,GO:0005737,GO:0005739,GO:0006139,GO:0006351,GO:0006390,GO:0006725,GO:0006807,GO:0008150,GO:0008152,GO:0009058,GO:0009059,GO:0009507,GO:0009536,GO:0009987,GO:0010467,GO:0016070,GO:0016740,GO:0016772,GO:0016779,GO:0018130,GO:0019438,GO:0030880,GO:0032774,GO:0032991,GO:0034062,GO:…	ko:K10908
Mt0013_00499	Medtr3g060220		0.38	0.26	0.3	1.51	1.54	1.59	0.313333	1.54667	2.3034	8.53e-09	8.18e-07	G	Belongs to the glycosyltransferase 2 family	-	-	-
Mt0017_10316	Medtr3g012380	NCR	479.79	442.67	463.28	183.78	194.24	256.27	461.913	211.43	-1.1274	8.63e-09	8.24e-07	#N/A	#N/A	#N/A	#N/A	#N/A
Mt0008_00268	Medtr5g057640		5.63	5.85	4.5	10.37	12.92	12.37	5.32667	11.8867	1.158	8.63e-09	8.24e-07	T	Protein kinase domain	-	GO:0000166,GO:0003674,GO:0003824,GO:0004672,GO:0005102,GO:0005488,GO:0005515,GO:0005524,GO:0005575,GO:0005623,GO:0005886,GO:0005911,GO:0006464,GO:0006468,GO:0006793,GO:0006796,GO:0006807,GO:0006950,GO:0006952,GO:0008144,GO:0008150,GO:0008152,GO:0009506,GO:0009605,GO:0009607,GO:0009617,GO:0009987,GO:0010941,GO:0016020,GO:0016021,GO:0016301,GO:0016310,GO:0016740,GO:0016772,GO:0016773,GO:0017076,GO:…	-
Mt0018_00114	Medtr2g027220		0	0	0	2.62	0.51	1.36	0.001	1.49667	10.5475	8.77e-09	8.35e-07	EH	Acetolactate synthase	ALS1	GO:0000166,GO:0000287,GO:0003674,GO:0003824,GO:0003984,GO:0005488,GO:0005575,GO:0005622,GO:0005623,GO:0005737,GO:0006082,GO:0006520,GO:0006549,GO:0006573,GO:0006807,GO:0006950,GO:0008150,GO:0008152,GO:0008652,GO:0009058,GO:0009081,GO:0009082,GO:0009097,GO:0009099,GO:0009507,GO:0009532,GO:0009536,GO:0009570,GO:0009635,GO:0009636,GO:0009987,GO:0016053,GO:0016740,GO:0016744,GO:0019752,GO:0019842,GO:…	ko:K01652
Mt0028_00268	Medtr8g023770		18.66	15.36	12.18	51.97	31.04	42.73	15.4	41.9133	1.4445	9.44e-09	8.89e-07	S	inactive purple acid phosphatase	-	GO:0003674,GO:0003824,GO:0003993,GO:0005488,GO:0005575,GO:0005576,GO:0006793,GO:0006796,GO:0008150,GO:0008152,GO:0009987,GO:0016311,GO:0016787,GO:0016788,GO:0016791,GO:0042578,GO:0043167,GO:0043169,GO:0044237,GO:0046872	-
Mt0007_10137	Medtr3g091010		5.04	5.88	5.45	17.23	9.68	16.09	5.45667	14.3333	1.3933	9.83e-09	9.23e-07	#N/A	#N/A	#N/A	#N/A	#N/A
Mt0023_10379	Medtr2g008430		2.95	3.44	2.27	15.35	6.41	12.61	2.88667	11.4567	1.9887	1.01e-08	9.43e-07	E	Aminotransferase	ALD1	GO:0001101,GO:0002376,GO:0003674,GO:0003824,GO:0005488,GO:0005507,GO:0005575,GO:0005622,GO:0005623,GO:0005737,GO:0006082,GO:0006520,GO:0006553,GO:0006807,GO:0006950,GO:0006952,GO:0006955,GO:0007154,GO:0007165,GO:0007275,GO:0007568,GO:0008144,GO:0008150,GO:0008152,GO:0008483,GO:0008652,GO:0009058,GO:0009066,GO:0009067,GO:0009085,GO:0009089,GO:0009507,GO:0009532,GO:0009536,GO:0009570,GO:0009605,GO:…	ko:K10206
Mt0043_10241	Medtr3g030420	NCR221-TC42842	12.56	12.06	13.39	4	3.98	6.2	12.67	4.72667	-1.4225	1.07e-08	9.98e-07	#N/A	#N/A	#N/A	#N/A	#N/A
Mt0030_00374	Medtr6g464010	NCR	1.44	1.19	2.4	0.25	0.19	0.17	1.67667	0.203333	-3.0437	1.09e-08	1.01e-06	#N/A	#N/A	#N/A	#N/A	#N/A
Mt0003_01373	Medtr4g082360		2.23	2.25	3.02	11.45	6.29	6.27	2.5	8.00333	1.6787	1.22e-08	1.13e-06	-	-	-	-	-
Mt0056_00185	Medtr2g041380	NCR	32.42	26.23	35.32	8.86	7.86	14.03	31.3233	10.25	-1.6116	1.26e-08	1.16e-06	#N/A	#N/A	#N/A	#N/A	#N/A
Mt0022_10207	Medtr7g056490		84.53	84.19	89.35	25.81	25.98	42.69	86.0233	31.4933	-1.4497	1.38e-08	1.26e-06	#N/A	#N/A	#N/A	#N/A	#N/A
Mt0018_00235	Medtr2g029860		8.03	5.91	9.13	36.98	18.25	20.2	7.69	25.1433	1.7091	1.43e-08	1.31e-06	Q	Removal of H(2)O(2), oxidation of toxic reductants, biosynthesis and degradation of lignin, suberization, auxin catabolism, response to environmental stresses such as wounding, pathogen attack and oxidative stress	-	GO:0000902,GO:0002682,GO:0002684,GO:0003674,GO:0003824,GO:0004601,GO:0005488,GO:0005575,GO:0005576,GO:0005618,GO:0005622,GO:0005623,GO:0005737,GO:0005773,GO:0005774,GO:0005794,GO:0006950,GO:0006952,GO:0006970,GO:0006979,GO:0008150,GO:0008152,GO:0009056,GO:0009314,GO:0009416,GO:0009505,GO:0009605,GO:0009607,GO:0009617,GO:0009620,GO:0009628,GO:0009636,GO:0009651,GO:0009653,GO:0009719,GO:0009725,GO:…	ko:K00430
Mt0018_10398	Medtr2g034250		1.17	1.32	1.64	0.22	0.13	0.23	1.37667	0.193333	-2.832	1.47e-08	1.34e-06	K	Belongs to the GRAS family	-	-	ko:K14494
Mt0013_00453	Medtr3g061170		3.19	3.3	4.79	10.43	14.62	8.39	3.76	11.1467	1.5678	1.78e-08	1.61e-06	O	Chaperone protein DNAj	-	GO:0005575,GO:0005622,GO:0005623,GO:0005634,GO:0005737,GO:0009507,GO:0009532,GO:0009536,GO:0009570,GO:0043226,GO:0043227,GO:0043229,GO:0043231,GO:0044422,GO:0044424,GO:0044434,GO:0044435,GO:0044444,GO:0044446,GO:0044464	-
Mt0003_00906	Medtr4g071880		2.02	2.21	2.1	0.43	0.51	0.66	2.11	0.533333	-1.9841	1.8e-08	1.62e-06	G	fructose-bisphosphate aldolase	-	-	ko:K01623
Mt0026_10015	Medtr7g066600		14.48	13.78	14.48	39.2	23.22	38.22	14.2467	33.5467	1.2355	1.82e-08	1.63e-06	A	LRR receptor-like serine threonine-protein kinase	-	-	-
Mt0008_00992	Medtr5g074600		9.88	6.57	4.3	20.15	29.21	31.61	6.91667	26.99	1.9643	1.97e-08	1.76e-06	S	Belongs to the class I-like SAM-binding methyltransferase superfamily. Cation-independent O- methyltransferase family	-	GO:0003674,GO:0003824,GO:0005488,GO:0005515,GO:0006725,GO:0008150,GO:0008152,GO:0008168,GO:0008171,GO:0008757,GO:0009058,GO:0009812,GO:0009987,GO:0016740,GO:0016741,GO:0019438,GO:0030761,GO:0032259,GO:0044237,GO:0044249,GO:0046983,GO:0071704,GO:0102303	ko:K13262,ko:K16040
Mt0021_10194	Medtr7g008970	NCR	18.9	18.73	20.22	7.85	5.52	9.59	19.2833	7.65333	-1.3332	2.04e-08	1.82e-06	#N/A	#N/A	#N/A	#N/A	#N/A
Mt0086_10004	Medtr7g062890		0.21	0	0.07	3.05	0.96	2.16	0.0933333	2.05667	4.4618	2.08e-08	1.86e-06	T	L-type lectin-domain containing receptor kinase	-	GO:0000166,GO:0001101,GO:0003674,GO:0003824,GO:0004672,GO:0004674,GO:0005488,GO:0005524,GO:0005575,GO:0005623,GO:0005886,GO:0006464,GO:0006468,GO:0006793,GO:0006796,GO:0006807,GO:0006950,GO:0006952,GO:0007275,GO:0008144,GO:0008150,GO:0008152,GO:0009555,GO:0009605,GO:0009607,GO:0009617,GO:0009719,GO:0009725,GO:0009751,GO:0009987,GO:0010033,GO:0014070,GO:0016020,GO:0016021,GO:0016301,GO:0016310,GO:…	-
Mt0023_10380	Medtr2g008400	BAK	0.48	0.33	0.53	4.25	2.15	1.73	0.446667	2.71	2.601	2.09e-08	1.86e-06	T	Belongs to the protein kinase superfamily. Ser Thr protein kinase family	SERK5	GO:0000166,GO:0003674,GO:0003824,GO:0004672,GO:0004674,GO:0004675,GO:0004713,GO:0004714,GO:0004888,GO:0005102,GO:0005488,GO:0005515,GO:0005524,GO:0005575,GO:0005622,GO:0005623,GO:0005737,GO:0005768,GO:0005886,GO:0006464,GO:0006468,GO:0006793,GO:0006796,GO:0006807,GO:0006950,GO:0006952,GO:0007154,GO:0007165,GO:0007166,GO:0007167,GO:0007178,GO:0008144,GO:0008150,GO:0008152,GO:0008219,GO:0009719,GO:…	ko:K13416,ko:K13417,ko:K13418
Mt0047_10193	Medtr2g066010		3.16	3.54	3.12	8.95	5.87	7.27	3.27333	7.36333	1.1696	2.45e-08	2.17e-06	O	Belongs to the SKP1 family	-	-	ko:K03094
Mt0024_00331	Medtr0330s0020	NCR	23.09	17.11	20.55	5.11	4.2	8.49	20.25	5.93333	-1.771	2.47e-08	2.18e-06	#N/A	#N/A	#N/A	#N/A	#N/A
Mt0013_10245	Medtr3g031340	NCR133-TC36625	1.72	1.69	1.44	0.03	0.03	0.27	1.61667	0.11	-3.8774	2.63e-08	2.31e-06	#N/A	#N/A	#N/A	#N/A	#N/A
Mt0008_10384	Medtr4g035760		61.03	55.21	65.65	30.09	21.23	31.98	60.63	27.7667	-1.1267	2.73e-08	2.39e-06	G	Belongs to the glycosyl hydrolase 5 (cellulase A) family	-	GO:0000272,GO:0003674,GO:0003824,GO:0004338,GO:0004553,GO:0005488,GO:0005575,GO:0005576,GO:0005623,GO:0005975,GO:0005976,GO:0006073,GO:0008150,GO:0008152,GO:0008422,GO:0009056,GO:0009057,GO:0009251,GO:0009986,GO:0009987,GO:0015926,GO:0016043,GO:0016052,GO:0016787,GO:0016798,GO:0043167,GO:0043169,GO:0043170,GO:0044042,GO:0044237,GO:0044238,GO:0044260,GO:0044262,GO:0044264,GO:0044464,GO:0045229,GO:…	-
Mt0024_00072	Medtr6g084035	NCR	0.86	1.32	1.64	0.03	0.03	0.03	1.27333	0.03	-5.4075	2.76e-08	2.41e-06	#N/A	#N/A	#N/A	#N/A	#N/A
Mt0043_00247	Medtr3g030620		2.23	2.51	2.89	6.49	4.71	5.67	2.54333	5.62333	1.1447	2.83e-08	2.47e-06	-	-	-	-	-
Mt0008_10375	Medtr5g061860		154.49	140.65	159.93	43.11	50.28	74.91	151.69	56.1	-1.4351	2.87e-08	2.49e-06	P	low affinity sulfate transporter	-	GO:0003674,GO:0005215,GO:0005575,GO:0005623,GO:0005886,GO:0005887,GO:0006810,GO:0006811,GO:0006820,GO:0008150,GO:0008271,GO:0008272,GO:0008509,GO:0015075,GO:0015103,GO:0015116,GO:0015291,GO:0015293,GO:0015318,GO:0015698,GO:0016020,GO:0016021,GO:0022804,GO:0022857,GO:0031224,GO:0031226,GO:0034220,GO:0044425,GO:0044459,GO:0044464,GO:0051179,GO:0051234,GO:0055085,GO:0071944,GO:0072348,GO:0098656,GO:…	ko:K17469
Mt0036_00038	Medtr1g108330		16.06	15.76	12.93	36.43	25.27	28.76	14.9167	30.1533	1.0154	3.06e-08	2.65e-06	-	-	-	-	-
Mt0004_11141	Medtr1g073390		1.3	1.42	1.54	0.28	0.19	0.3	1.42	0.256667	-2.4679	3.14e-08	2.71e-06	O	Belongs to the ubiquitin-conjugating enzyme family	-	-	ko:K10576
Mt0006_00415	Medtr3g080180		1.99	2.11	1.74	0.25	0.13	0.5	1.94667	0.293333	-2.7304	3.18e-08	2.74e-06	O	Ubiquitin homologues	-	GO:0005575,GO:0005622,GO:0005623,GO:0005634,GO:0005737,GO:0043226,GO:0043227,GO:0043229,GO:0043231,GO:0044424,GO:0044464	ko:K08770
Mt0003_00443	Medtr4g060720	NCR	49.54	47.61	56.43	17.85	17.96	27.04	51.1933	20.95	-1.289	3.2e-08	2.75e-06	#N/A	#N/A	#N/A	#N/A	#N/A
Mt0050_10184	Medtr1g053975	NCR	22.06	18.87	21.3	5.88	5.9	9.89	20.7433	7.22333	-1.5219	3.21e-08	2.75e-06	#N/A	#N/A	#N/A	#N/A	#N/A
Mt0005_00936	Medtr5g023775	NCR	3.53	3.34	6.04	1.08	0.67	1.26	4.30333	1.00333	-2.1007	3.57e-08	3.03e-06	#N/A	#N/A	#N/A	#N/A	#N/A
Mt0088_10038	Medtr7g016060		155.04	157.04	179.23	50.95	62.85	84	163.77	65.9333	-1.3126	3.69e-08	3.11e-06	S	NADH-ubiquinone reductase complex 1 MLRQ subunit	-	-	-
Mt0093_10046	Medtr6g038480		42.99	34.63	48.68	16.37	17.19	21.6	42.1	18.3867	-1.1952	3.7e-08	3.11e-06	#N/A	#N/A	#N/A	#N/A	#N/A
Mt0113_10014	Medtr0015s0030		4.73	4	3.97	10.71	7.44	10.48	4.23333	9.54333	1.1727	3.72e-08	3.12e-06	T	L-type lectin-domain containing receptor kinase	-	GO:0000166,GO:0003674,GO:0003824,GO:0004672,GO:0004674,GO:0005488,GO:0005524,GO:0005575,GO:0005623,GO:0005886,GO:0006464,GO:0006468,GO:0006793,GO:0006796,GO:0006807,GO:0008144,GO:0008150,GO:0008152,GO:0009987,GO:0016020,GO:0016021,GO:0016301,GO:0016310,GO:0016740,GO:0016772,GO:0016773,GO:0017076,GO:0019538,GO:0030246,GO:0030554,GO:0031224,GO:0032553,GO:0032555,GO:0032559,GO:0035639,GO:0036094,GO:…	-
Mt0031_10045	Medtr7g098780		0.1	0.26	0.36	4.58	1.19	2.29	0.24	2.68667	3.4847	3.9e-08	3.26e-06	Q	Belongs to the ABC transporter superfamily. ABCG family. PDR (TC 3.A.1.205) subfamily	-	-	-
Mt0003_01422	Medtr4g074995		3.4	2.87	3.05	5.97	7.7	8.09	3.10667	7.25333	1.2233	4.08e-08	3.4e-06	Q	Belongs to the peroxidase family. Classical plant (class III) peroxidase subfamily	-	GO:0001666,GO:0003674,GO:0003824,GO:0004601,GO:0005488,GO:0005575,GO:0005576,GO:0006950,GO:0006979,GO:0008150,GO:0008152,GO:0009056,GO:0009628,GO:0009636,GO:0009987,GO:0016209,GO:0016491,GO:0016684,GO:0016999,GO:0017001,GO:0017144,GO:0020037,GO:0033554,GO:0036293,GO:0036294,GO:0042221,GO:0042737,GO:0042743,GO:0042744,GO:0043167,GO:0043169,GO:0044237,GO:0044248,GO:0046872,GO:0046906,GO:0048037,GO:…	ko:K00430
Mt0025_00251	Medtr6g010810		3.53	4.49	4.4	1.75	0.96	1.43	4.14	1.38	-1.585	4.17e-08	3.47e-06	S	Plant protein of unknown function	-	-	-
Mt0045_10263	Medtr0147s0030		1.68	2.08	1.51	8.15	3.88	5.77	1.75667	5.93333	1.756	4.24e-08	3.51e-06	Q	Cytochrome p450	-	GO:0003674,GO:0003824,GO:0004497,GO:0005488,GO:0005506,GO:0005575,GO:0006629,GO:0008150,GO:0008152,GO:0008202,GO:0010268,GO:0010817,GO:0016020,GO:0016021,GO:0016128,GO:0016131,GO:0016491,GO:0016705,GO:0020037,GO:0031224,GO:0040008,GO:0042445,GO:0042592,GO:0043167,GO:0043169,GO:0044238,GO:0044425,GO:0046872,GO:0046906,GO:0046914,GO:0048037,GO:0048878,GO:0050789,GO:0055088,GO:0055114,GO:0065007,GO:…	ko:K20661
Mt0021_00297	Medtr7g010820		6.83	3.24	3.48	24.43	12.89	17.25	4.51667	18.19	2.0098	4.36e-08	3.61e-06	E	POT family	-	GO:0001101,GO:0003674,GO:0005215,GO:0005451,GO:0005575,GO:0005623,GO:0005886,GO:0006082,GO:0006807,GO:0006810,GO:0006811,GO:0006812,GO:0006813,GO:0006820,GO:0007275,GO:0007568,GO:0008150,GO:0008152,GO:0008324,GO:0008509,GO:0009987,GO:0010035,GO:0010038,GO:0010150,GO:0010167,GO:0015075,GO:0015077,GO:0015078,GO:0015079,GO:0015103,GO:0015112,GO:0015291,GO:0015293,GO:0015297,GO:0015298,GO:0015299,GO:…	ko:K14638
Mt0137_00033	Medtr2g040650		13.72	8.52	34.4	131.53	124.84	71.39	18.88	109.253	2.5327	4.49e-08	3.7e-06	G	chitinase activity	-	GO:0000272,GO:0003674,GO:0003824,GO:0004553,GO:0004568,GO:0004857,GO:0005975,GO:0005976,GO:0006022,GO:0006026,GO:0006030,GO:0006032,GO:0006040,GO:0006807,GO:0008150,GO:0008152,GO:0009056,GO:0009057,GO:0009987,GO:0015066,GO:0016052,GO:0016787,GO:0016798,GO:0017144,GO:0030234,GO:0042737,GO:0043086,GO:0043170,GO:0044092,GO:0044237,GO:0044238,GO:0044248,GO:0046348,GO:0050790,GO:0065007,GO:0065009,GO:…	ko:K01183
Mt0004_11162	Medtr1g073780		0.27	0.33	0.62	3.35	1.73	1.86	0.406667	2.31333	2.5081	5.03e-08	4.09e-06	-	-	-	-	-
Mt0121_00057	Medtr2125s0010	NCR	277.1	247.77	277.38	111.75	124.91	153.33	267.417	129.997	-1.0406	5.05e-08	4.1e-06	#N/A	#N/A	#N/A	#N/A	#N/A
Mt0001_01304	Medtr4g105020		0.34	0.46	0.39	1.57	1.67	1.56	0.396667	1.6	2.0121	5.44e-08	4.39e-06	S	PB1 domain	-	-	-
Mt0044_10207	Medtr7g031915	NCR	34.99	29.7	37.19	9.63	10.61	16.52	33.96	12.2533	-1.4707	5.81e-08	4.66e-06	#N/A	#N/A	#N/A	#N/A	#N/A
Mt0093_00022	Medtr6g038090		0.62	0.69	0.62	4.28	1.73	2.95	0.643333	2.98667	2.2149	5.88e-08	4.71e-06	S	resistance protein	-	-	-
Mt0066_10082	Medtr8g032950		5.94	7.24	6.7	17.08	10.81	16.82	6.62667	14.9033	1.1693	6e-08	4.79e-06	CG	Belongs to the UDP-glycosyltransferase family	-	-	ko:K18822
Mt0064_10177	Medtr4g011680	MtSNARP1 (small nodulin acidic RNA-binding peptide)	56.54	59.87	68.84	16.83	14.49	28.96	61.75	20.0933	-1.6197	6.06e-08	4.83e-06	#N/A	#N/A	#N/A	#N/A	#N/A
Mt0026_10468	Medtr7g077350		4.56	3.77	4.53	1.11	1.54	1.73	4.28667	1.46	-1.5539	6.33e-08	5.02e-06	#N/A	#N/A	#N/A	#N/A	#N/A
Mt0001_01073	Medtr4g109900		0.21	0.17	0.59	3.78	1.86	1.89	0.323333	2.51	2.9566	6.67e-08	5.27e-06	E	Isoaspartyl peptidase	-	GO:0001101,GO:0002376,GO:0003674,GO:0003676,GO:0003677,GO:0003824,GO:0004067,GO:0004175,GO:0004190,GO:0005488,GO:0005575,GO:0005622,GO:0005623,GO:0005737,GO:0005783,GO:0005829,GO:0006508,GO:0006807,GO:0006950,GO:0006952,GO:0006955,GO:0008150,GO:0008152,GO:0008233,GO:0008238,GO:0008242,GO:0008798,GO:0009056,GO:0009057,GO:0009414,GO:0009415,GO:0009605,GO:0009607,GO:0009627,GO:0009628,GO:0009719,GO:…	ko:K13051
Mt0003_11515	Medtr4g085100		4.46	4.26	5.12	12.92	8.37	8.96	4.61333	10.0833	1.1281	6.87e-08	5.4e-06	S	Domain of unknown function (DUF4228)	-	-	-
Mt0046_10076	Medtr8g028600	ACC synthase	0.03	0.33	0.07	4.43	1.09	2.59	0.143333	2.70333	4.2373	7e-08	5.48e-06	T	1-aminocyclopropane-1-carboxylate synthase	ACS2	GO:0000003,GO:0003006,GO:0003674,GO:0003824,GO:0005488,GO:0006082,GO:0006520,GO:0006807,GO:0007275,GO:0007568,GO:0008144,GO:0008150,GO:0008152,GO:0008652,GO:0009058,GO:0009692,GO:0009693,GO:0009835,GO:0009987,GO:0010154,GO:0010817,GO:0016053,GO:0016829,GO:0016846,GO:0016847,GO:0018871,GO:0019752,GO:0019842,GO:0021700,GO:0022414,GO:0030170,GO:0032501,GO:0032502,GO:0032787,GO:0036094,GO:0042218,GO:…	ko:K01762,ko:K20772
Mt0039_00027	Medtr1g090820		1119.77	934.27	1158.68	462.44	513.22	605.29	1070.91	526.983	-1.023	7.43e-08	5.79e-06	C	Belongs to the globin family	-	GO:0003674,GO:0005344,GO:0005488,GO:0006082,GO:0006629,GO:0006631,GO:0006638,GO:0006639,GO:0006641,GO:0006810,GO:0008144,GO:0008150,GO:0008152,GO:0008610,GO:0009058,GO:0009877,GO:0009987,GO:0015669,GO:0015671,GO:0015893,GO:0019432,GO:0019752,GO:0019825,GO:0020037,GO:0032787,GO:0036094,GO:0042221,GO:0042493,GO:0043167,GO:0043169,GO:0043436,GO:0044237,GO:0044238,GO:0044249,GO:0044255,GO:0044281,GO:…	ko:K21893
Mt0008_10570	Medtr5g066020		5.83	4.53	7.62	13.57	15.68	12.37	5.99333	13.8733	1.2109	7.68e-08	5.97e-06	#N/A	#N/A	#N/A	#N/A	#N/A
Mt0027_10388	Medtr2g078350		6.35	6.64	7.98	12.86	18.57	14.03	6.99	15.1533	1.1163	7.76e-08	6e-06	S	Belongs to the Ca(2 ) cation antiporter (CaCA) (TC 2.A.19) family	-	-	-
Mt0010_00208	Medtr5g081555		12.21	12.59	15.59	4.55	4.17	6.77	13.4633	5.16333	-1.3827	8.52e-08	6.57e-06	#N/A	#N/A	#N/A	#N/A	#N/A
Mt0026_00160	Medtr7g070593		13.28	12.92	14.84	7.51	5.42	7.4	13.68	6.77667	-1.0134	8.53e-08	6.57e-06	CG	Belongs to the UDP-glycosyltransferase family	-	GO:0003674,GO:0003824,GO:0008150,GO:0008152,GO:0008194,GO:0016740,GO:0016757,GO:0016758,GO:0035251,GO:0046527,GO:0047893,GO:0102360,GO:0102425	ko:K18822
Mt0006_10270	Medtr3g084820	NCR	361.95	330.33	315.46	106.52	94.28	169.35	335.913	123.383	-1.4449	8.91e-08	6.84e-06	#N/A	#N/A	#N/A	#N/A	#N/A
Mt0005_00083	Medtr5g006670		14.58	12.13	14.08	24.98	41.05	30.49	13.5967	32.1733	1.2426	9.16e-08	7.01e-06	C	12-oxophytodienoate reductase	OPR1	GO:0000166,GO:0003674,GO:0003824,GO:0005488,GO:0005575,GO:0005622,GO:0005623,GO:0005737,GO:0006082,GO:0006629,GO:0006631,GO:0006633,GO:0006950,GO:0008150,GO:0008152,GO:0008610,GO:0009058,GO:0009611,GO:0009987,GO:0010181,GO:0016053,GO:0016491,GO:0016627,GO:0016628,GO:0016629,GO:0019752,GO:0031407,GO:0031408,GO:0032553,GO:0032787,GO:0036094,GO:0043167,GO:0043168,GO:0043436,GO:0044237,GO:0044238,GO:…	ko:K05894
Mt0066_10127	Medtr8g432440		4.46	4.59	7.22	14.58	21.33	11.94	5.42333	15.95	1.5563	9.3e-08	7.1e-06	S	BON1-associated protein 2-like	-	GO:0005575,GO:0006950,GO:0006952,GO:0008150,GO:0016020,GO:0050896	-
Mt0048_00148	Medtr2g073090	NCR153-TC35251	7.68	7.04	7.16	2.65	2.69	3.75	7.29333	3.03	-1.2673	9.53e-08	7.24e-06	#N/A	#N/A	#N/A	#N/A	#N/A
Mt0013_10211	Medtr3g466180		8.51	7.37	9.36	45.54	16.23	27.24	8.41333	29.67	1.8183	1.01e-07	7.67e-06	Q	Belongs to the peroxidase family. Classical plant (class III) peroxidase subfamily	-	GO:0003674,GO:0003824,GO:0004601,GO:0005488,GO:0005575,GO:0005576,GO:0005618,GO:0005622,GO:0005623,GO:0005737,GO:0005794,GO:0005829,GO:0006725,GO:0006950,GO:0006979,GO:0008150,GO:0008152,GO:0009056,GO:0009058,GO:0009636,GO:0009698,GO:0009699,GO:0009808,GO:0009809,GO:0009888,GO:0009889,GO:0009891,GO:0009893,GO:0009987,GO:0010087,GO:0010089,GO:0012505,GO:0016209,GO:0016491,GO:0016684,GO:0016999,GO:…	ko:K00430
Mt0021_10196	Medtr7g008985	NCR147-TC29568	3.81	4.56	5.48	1.08	1.03	1.89	4.61667	1.33333	-1.7918	1.08e-07	8.14e-06	#N/A	#N/A	#N/A	#N/A	#N/A
Mt0013_00715	Medtr3g055490	MtCAML4	10.98	16.06	18.12	4.71	4.49	6.83	15.0533	5.34333	-1.4943	1.1e-07	8.22e-06	DTZ	Calcium-binding protein	-	GO:0003674,GO:0005488,GO:0005509,GO:0005575,GO:0005622,GO:0005623,GO:0005634,GO:0005737,GO:0006950,GO:0007275,GO:0008150,GO:0009266,GO:0009409,GO:0009628,GO:0009653,GO:0009888,GO:0009987,GO:0010015,GO:0010053,GO:0010054,GO:0016049,GO:0021700,GO:0022622,GO:0030154,GO:0032501,GO:0032502,GO:0040007,GO:0043167,GO:0043169,GO:0043226,GO:0043227,GO:0043229,GO:0043231,GO:0044424,GO:0044464,GO:0046872,GO:…	ko:K02183
Mt0013_10054	Medtr3g062950		0.24	0.03	0.13	1.91	1.03	1.19	0.133333	1.37667	3.3681	1.16e-07	8.7e-06	F	Bis(5'-adenosyl)-triphosphatase-like	-	GO:0000166,GO:0003674,GO:0003824,GO:0004551,GO:0005488,GO:0005575,GO:0005622,GO:0005623,GO:0005737,GO:0005829,GO:0016462,GO:0016787,GO:0016810,GO:0016811,GO:0016817,GO:0016818,GO:0016819,GO:0036094,GO:0043530,GO:0044424,GO:0044444,GO:0044464,GO:0047627,GO:0047710,GO:0097159,GO:1901265,GO:1901363	ko:K01522
Mt0068_10103	Medtr2g022330		50.67	43.15	49.44	176.89	87.39	104	47.7533	122.76	1.3622	1.23e-07	9.16e-06	O	Belongs to the peptidase A1 family	-	-	-
Mt0006_10531	Medtr3g078633		102.07	78.87	89.55	160.21	223.87	174.82	90.1633	186.3	1.047	1.24e-07	9.17e-06	G	Lipase (class 3)	-	-	ko:K18875
Mt0004_00105	Medtr1g080720		1.72	2.11	1.18	4.43	4.91	4.25	1.67	4.53	1.4397	1.27e-07	9.43e-06	P	LRR receptor-like serine threonine-protein kinase	-	-	-
Mt0008_00419	Medtr5g061620		0.75	0.73	0.98	2.83	2.12	2.29	0.82	2.41333	1.5573	1.29e-07	9.52e-06	#N/A	#N/A	#N/A	#N/A	#N/A
Mt0032_10312	Medtr6g452900		65.97	56.33	65.49	25.54	29.6	35.2	62.5967	30.1133	-1.0557	1.39e-07	1.02e-05	#N/A	#N/A	#N/A	#N/A	#N/A
Mt0016_00284	Medtr2g099790		42.44	47.74	38.31	14.52	10.1	20.34	42.83	14.9867	-1.5149	1.4e-07	1.03e-05	S	Short calmodulin-binding motif containing conserved Ile and Gln residues.	-	-	-
Mt0021_10417	Medtr7g014570		3.05	2.87	3.87	9.94	6.38	6.73	3.26333	7.68333	1.2354	1.47e-07	1.07e-05	S	Belongs to the class I-like SAM-binding methyltransferase superfamily. Cation-independent O- methyltransferase family	-	GO:0003674,GO:0003824,GO:0005488,GO:0005515,GO:0006725,GO:0008150,GO:0008152,GO:0008168,GO:0008171,GO:0008757,GO:0009058,GO:0009698,GO:0009699,GO:0009987,GO:0016740,GO:0016741,GO:0019438,GO:0019748,GO:0032259,GO:0044237,GO:0044249,GO:0044550,GO:0046983,GO:0050630,GO:0071704,GO:0102719,GO:0102767,GO:1901360,GO:1901362,GO:1901576	ko:K13262,ko:K16040
Mt0003_10433	Medtr4g060650	NCR	14.24	12.62	11.65	3.6	3.53	6.1	12.8367	4.41	-1.5414	1.49e-07	1.09e-05	#N/A	#N/A	#N/A	#N/A	#N/A
Mt0035_10112	Medtr7g022600		0.21	0.17	0.2	1.05	1.25	1.09	0.193333	1.13	2.5472	1.52e-07	1.1e-05	S	F-box kelch-repeat protein	-	GO:0003674,GO:0003824,GO:0004842,GO:0005575,GO:0005622,GO:0005623,GO:0005634,GO:0006464,GO:0006508,GO:0006511,GO:0006807,GO:0008150,GO:0008152,GO:0009056,GO:0009057,GO:0009987,GO:0010498,GO:0016567,GO:0016740,GO:0019538,GO:0019787,GO:0019941,GO:0030163,GO:0031146,GO:0032446,GO:0036211,GO:0043161,GO:0043170,GO:0043226,GO:0043227,GO:0043229,GO:0043231,GO:0043412,GO:0043632,GO:0044237,GO:0044238,GO:…	-
Mt0041_00237	Medtr4g091850		5.63	4.36	6.17	17.35	11.74	10.25	5.38667	13.1133	1.2836	1.53e-07	1.11e-05	T	G-type lectin S-receptor-like serine threonine-protein kinase	-	GO:0000003,GO:0000166,GO:0003674,GO:0003824,GO:0004672,GO:0004674,GO:0005488,GO:0005515,GO:0005516,GO:0005524,GO:0005575,GO:0005623,GO:0005886,GO:0006464,GO:0006468,GO:0006793,GO:0006796,GO:0006807,GO:0007154,GO:0008037,GO:0008144,GO:0008150,GO:0008152,GO:0009856,GO:0009875,GO:0009987,GO:0016020,GO:0016021,GO:0016301,GO:0016310,GO:0016740,GO:0016772,GO:0016773,GO:0017076,GO:0019538,GO:0022414,GO:…	-
Mt0002_01497	Medtr1g042310		104.67	92.68	100.78	43.29	43.13	58.52	99.3767	48.3133	-1.0405	1.54e-07	1.11e-05	E	Protein NRT1 PTR FAMILY 5.2-like	-	GO:0001101,GO:0003674,GO:0005215,GO:0005575,GO:0006810,GO:0006857,GO:0006950,GO:0006952,GO:0006970,GO:0006972,GO:0008150,GO:0009605,GO:0009607,GO:0009611,GO:0009617,GO:0009624,GO:0009628,GO:0009651,GO:0009719,GO:0009725,GO:0009737,GO:0009751,GO:0009753,GO:0010033,GO:0010243,GO:0014070,GO:0015833,GO:0016020,GO:0016021,GO:0022857,GO:0031224,GO:0033993,GO:0035672,GO:0035673,GO:0042221,GO:0042493,GO:…	ko:K14638
Mt0002_10120	Medtr1g009760		26.86	21.94	28.99	10.92	7.89	13.07	25.93	10.6267	-1.2869	1.54e-07	1.11e-05	P	Plasma membrane ATPase	-	GO:0000166,GO:0003674,GO:0003824,GO:0005215,GO:0005488,GO:0005524,GO:0005575,GO:0005623,GO:0005886,GO:0006810,GO:0006811,GO:0006812,GO:0008144,GO:0008150,GO:0008324,GO:0008553,GO:0015075,GO:0015077,GO:0015078,GO:0015318,GO:0015399,GO:0015405,GO:0015662,GO:0015672,GO:0016020,GO:0016021,GO:0016462,GO:0016787,GO:0016817,GO:0016818,GO:0016887,GO:0017076,GO:0017111,GO:0019829,GO:0022804,GO:0022853,GO:…	ko:K01535
Mt0057_10178	Medtr1g104960		1.65	1.09	1.64	3.51	4.2	3.72	1.46	3.81	1.3838	1.61e-07	1.16e-05	B	histone deacetylation	-	GO:0000003,GO:0001708,GO:0002119,GO:0002164,GO:0003006,GO:0003674,GO:0005488,GO:0005515,GO:0005575,GO:0005622,GO:0005623,GO:0005634,GO:0006325,GO:0006355,GO:0006464,GO:0006476,GO:0006807,GO:0006996,GO:0007275,GO:0007423,GO:0007548,GO:0008150,GO:0008152,GO:0009653,GO:0009791,GO:0009887,GO:0009889,GO:0009987,GO:0010468,GO:0010556,GO:0016043,GO:0016569,GO:0016570,GO:0016575,GO:0019219,GO:0019222,GO:…	ko:K07560,ko:K11644
Mt0040_00135	Medtr3g112100		5.49	5.72	3.97	1.42	1.48	2.09	5.06	1.66333	-1.6051	1.63e-07	1.17e-05	-	-	-	-	-
Mt0054_00018	Medtr6g065570		4.01	2.64	7.52	39.35	33.42	11.31	4.72333	28.0267	2.5689	1.64e-07	1.17e-05	S	Miraculin-like	-	GO:0000302,GO:0001101,GO:0002237,GO:0002238,GO:0003674,GO:0004857,GO:0004866,GO:0004867,GO:0005575,GO:0005622,GO:0005623,GO:0005737,GO:0005739,GO:0006950,GO:0006952,GO:0006970,GO:0006979,GO:0008150,GO:0008219,GO:0009605,GO:0009607,GO:0009611,GO:0009617,GO:0009620,GO:0009624,GO:0009625,GO:0009628,GO:0009636,GO:0009651,GO:0009719,GO:0009725,GO:0009751,GO:0009892,GO:0009987,GO:0010033,GO:0010035,GO:…	-
Mt0058_10136	Medtr7g095970		1.78	3.01	1.81	0.22	0.32	0.56	2.2	0.366667	-2.585	1.65e-07	1.18e-05	T	Belongs to the DEFL family	-	-	-
Mt0001_01851	Medtr4g094555		0.07	0.43	0.07	6.12	1.28	2.69	0.19	3.36333	4.1458	1.8e-07	1.28e-05	S	Encoded by	-	-	-
Mt0003_10102	Medtr4g052460		13.07	10.8	18.97	33.63	58.33	34.7	14.28	42.22	1.5639	1.87e-07	1.33e-05	S	F-box protein At2g27310-like	-	GO:0000151,GO:0005575,GO:0005622,GO:0005623,GO:0008150,GO:0016020,GO:0019005,GO:0019216,GO:0019218,GO:0019222,GO:0031461,GO:0032991,GO:0044424,GO:0044464,GO:0050789,GO:0065007,GO:0080090,GO:1902494,GO:1990234	-
Mt0022_10311	Medtr7g057560		72.15	66.15	63.52	24.28	22.83	36.52	67.2733	27.8767	-1.271	1.95e-07	1.38e-05	#N/A	#N/A	#N/A	#N/A	#N/A
Mt0081_10012	Medtr0009s0250		0.07	0.03	0.26	11.01	0.83	1.79	0.12	4.54333	5.2426	1.96e-07	1.38e-05	S	Belongs to the 'GDSL' lipolytic enzyme family	-	GO:0003674,GO:0003824,GO:0005575,GO:0005576,GO:0006629,GO:0008150,GO:0008152,GO:0009056,GO:0016042,GO:0016787,GO:0016788,GO:0044238,GO:0071704,GO:1901575	-
Mt0026_00206	Medtr7g071720	NCR168-TC35186	359.24	298.78	357.61	161.75	141.07	198.05	338.543	166.957	-1.0199	1.99e-07	1.4e-05	#N/A	#N/A	#N/A	#N/A	#N/A
Mt0008_00769	Medtr5g069545	NCR	189.21	150.99	180.22	70.15	75.39	97.17	173.473	80.9033	-1.1004	2.04e-07	1.43e-05	#N/A	#N/A	#N/A	#N/A	#N/A
Mt0048_00150	Medtr2g073050		0.27	0.17	0.59	5.97	1.48	2.62	0.343333	3.35667	3.2893	2.09e-07	1.47e-05	S	Neprosin	-	-	-
Mt0056_00134	Medtr2g043010		2.74	3.54	2.82	8.74	5.39	7.23	3.03333	7.12	1.231	2.1e-07	1.47e-05	K	Golgin candidate	-	GO:0005575,GO:0005622,GO:0005623,GO:0005737,GO:0005794,GO:0012505,GO:0043226,GO:0043227,GO:0043229,GO:0043231,GO:0044424,GO:0044444,GO:0044464	ko:K20286
Mt0038_00311	Medtr8g064050	NCR	0.86	1.35	1.21	0.12	0.19	0.13	1.14	0.146667	-2.9584	2.11e-07	1.47e-05	#N/A	#N/A	#N/A	#N/A	#N/A
Mt0013_00574	Medtr3g058670		5.8	5.39	4.89	14.98	8.85	13.07	5.36	12.3	1.1984	2.14e-07	1.49e-05	T	Protein of unknown function (DUF3148)	-	-	-
Mt0037_10274	Medtr8g041890		0.99	1.55	1.05	7.17	3.27	3.65	1.19667	4.69667	1.9726	2.19e-07	1.52e-05	T	Cysteine-rich receptor-like protein kinase	-	-	-
Mt0026_00155	Medtr7g070560	NCR	4.15	3.5	4.89	1.54	0.77	1.49	4.18	1.26667	-1.7225	2.34e-07	1.62e-05	#N/A	#N/A	#N/A	#N/A	#N/A
Mt0018_00024	Medtr2g025270		0.82	1.45	1.25	0.18	0.16	0.1	1.17333	0.146667	-3	2.38e-07	1.65e-05	S	PB1 domain	-	-	-
Mt0003_00397	Medtr4g059730		37.02	47.05	43.43	133.38	67.31	101.01	42.5	100.567	1.2426	2.44e-07	1.68e-05	O	glutathione	-	-	ko:K00799
Mt0014_00520	Medtr4g026680	NCR	76.47	64.99	70.74	35.88	27.87	40.6	70.7333	34.7833	-1.024	2.59e-07	1.77e-05	#N/A	#N/A	#N/A	#N/A	#N/A
Mt0086_00065	Medtr7g065130		32.7	35.06	47.24	96.03	62.15	75.83	38.3333	78.0033	1.0249	2.59e-07	1.77e-05	-	-	-	-	-
Mt0005_10289	Medtr5g010520		4.97	5.48	5.97	18.92	9.2	14.13	5.47333	14.0833	1.3635	2.65e-07	1.81e-05	S	N-terminal C2 in EEIG1 and EHBP1 proteins	-	-	ko:K10352
Mt0011_00592	Medtr7g082810		83.09	76.26	78.85	39.23	32.39	47.44	79.4	39.6867	-1.0005	2.66e-07	1.81e-05	V	Belongs to the multi antimicrobial extrusion (MATE) (TC 2.A.66.1) family	-	-	ko:K03327
Mt0024_00349	Medtr6g091600	NCR	208.32	186.01	224.4	82.52	81.42	118.5	206.243	94.1467	-1.1314	2.67e-07	1.82e-05	#N/A	#N/A	#N/A	#N/A	#N/A
Mt0028_10146	Medtr8g020300		1.03	1.32	2.07	8.8	3.62	5.41	1.47333	5.94333	2.0122	2.69e-07	1.82e-05	S	NB-ARC domain	-	-	-
Mt0036_10285	Medtr7g117200		1.37	1.55	1.81	5.94	3.27	4.01	1.57667	4.40667	1.4828	2.83e-07	1.91e-05	K	WRKY transcription factor	-	GO:0000976,GO:0000987,GO:0001067,GO:0003674,GO:0003676,GO:0003677,GO:0003690,GO:0003700,GO:0005488,GO:0005575,GO:0005622,GO:0005623,GO:0005634,GO:0005730,GO:0006139,GO:0006351,GO:0006355,GO:0006725,GO:0006807,GO:0007275,GO:0008150,GO:0008152,GO:0009058,GO:0009059,GO:0009791,GO:0009889,GO:0009987,GO:0010033,GO:0010200,GO:0010243,GO:0010467,GO:0010468,GO:0010556,GO:0016070,GO:0018130,GO:0019219,GO:…	-
Mt0013_00716	Medtr3g055480	MtCAML6	138.6	132.13	146.24	60.67	43.9	76.4	138.99	60.3233	-1.2042	2.98e-07	2.01e-05	DTZ	Calcium-binding protein	-	-	ko:K02183
Mt0036_00216	Medtr7g115650		10.12	9.55	7.55	16.15	22.74	22.79	9.07333	20.56	1.1801	3.01e-07	2.02e-05	K	SANT SWI3, ADA2, N-CoR and TFIIIB'' DNA-binding domains	-	-	ko:K09422
Mt0007_10826	Medtr3g104990		11.25	13.88	15.59	7.45	5.16	6.7	13.5733	6.43667	-1.0764	3.13e-07	2.1e-05	M	Mechanosensitive ion channel protein 10-like	-	GO:0000302,GO:0003674,GO:0005215,GO:0005575,GO:0005623,GO:0005886,GO:0006810,GO:0006811,GO:0006820,GO:0006950,GO:0006979,GO:0007275,GO:0007568,GO:0008150,GO:0008219,GO:0008381,GO:0009581,GO:0009582,GO:0009605,GO:0009612,GO:0009628,GO:0009987,GO:0010150,GO:0012501,GO:0015267,GO:0016020,GO:0016021,GO:0022803,GO:0022836,GO:0022857,GO:0031224,GO:0032501,GO:0032502,GO:0033554,GO:0034599,GO:0034614,GO:…	ko:K22048
Mt0076_00068	Medtr8g080060		0.51	0.79	0.62	0	0	0	0.64	0.001	-9.3219	3.56e-07	2.37e-05	S	NADH-ubiquinone reductase complex 1 MLRQ subunit	-	-	-
Mt0001_00718	Medtr4g119410		16.74	16.85	15.33	27.01	42.71	34.3	16.3067	34.6733	1.0884	3.65e-07	2.42e-05	Q	Belongs to the iron ascorbate-dependent oxidoreductase family	-	-	-
Mt0003_00435	Medtr4g060660		2.02	4.66	2.4	0.4	0.32	0.76	3.02667	0.493333	-2.6171	3.81e-07	2.52e-05	#N/A	#N/A	#N/A	#N/A	#N/A
Mt0040_00197	Medtr3g113660		1.82	2.28	2.76	5.42	4.3	5.71	2.28667	5.14333	1.1695	3.82e-07	2.53e-05	-	-	-	-	-
Mt0003_11570	Medtr4g086320		10.94	12.19	13.59	47.41	21.55	28.4	12.24	32.4533	1.4068	3.88e-07	2.56e-05	S	Cell number regulator	-	GO:0005575,GO:0008150,GO:0008285,GO:0016020,GO:0016021,GO:0031224,GO:0042127,GO:0044425,GO:0048519,GO:0048523,GO:0050789,GO:0050794,GO:0065007	-
Mt0005_00932	Medtr5g023730		1.72	1.69	1.84	11.26	3.94	5.51	1.75	6.90333	1.9799	3.96e-07	2.61e-05	I	acyl-activating enzyme 1	-	GO:0003674,GO:0003824,GO:0005575,GO:0005622,GO:0005623,GO:0005737,GO:0005777,GO:0006082,GO:0006629,GO:0006631,GO:0008150,GO:0008152,GO:0009987,GO:0016874,GO:0019752,GO:0032787,GO:0042579,GO:0043226,GO:0043227,GO:0043229,GO:0043231,GO:0043436,GO:0044237,GO:0044238,GO:0044255,GO:0044281,GO:0044424,GO:0044444,GO:0044464,GO:0071704	ko:K00666
Mt0015_10226	Medtr8g010200		0.69	0.93	0.95	3.42	1.89	3.15	0.856667	2.82	1.7189	4.09e-07	2.68e-05	#N/A	#N/A	#N/A	#N/A	#N/A
Mt0002_00805	Medtr1g026070		4.67	4.39	4.33	0.77	1.51	1.66	4.46333	1.31333	-1.7649	4.09e-07	2.68e-05	O	E3 ubiquitin-protein ligase	-	GO:0003674,GO:0003824,GO:0004842,GO:0005488,GO:0005575,GO:0006464,GO:0006508,GO:0006511,GO:0006807,GO:0008150,GO:0008152,GO:0009056,GO:0009057,GO:0009987,GO:0010498,GO:0016020,GO:0016021,GO:0016567,GO:0016740,GO:0019538,GO:0019787,GO:0019941,GO:0030163,GO:0031224,GO:0032446,GO:0036211,GO:0043161,GO:0043167,GO:0043169,GO:0043170,GO:0043412,GO:0043632,GO:0044237,GO:0044238,GO:0044248,GO:0044257,GO:…	ko:K19037
Mt0136_00009	Medtr0337s0060		0.89	0.86	0.92	2.37	2.15	2.95	0.89	2.49	1.4843	4.14e-07	2.71e-05	E	vacuolar amino acid transporter	-	GO:0003333,GO:0003674,GO:0005215,GO:0005342,GO:0005575,GO:0006810,GO:0006811,GO:0006820,GO:0006865,GO:0008150,GO:0008509,GO:0008514,GO:0015075,GO:0015171,GO:0015318,GO:0015711,GO:0015849,GO:0016020,GO:0016021,GO:0022857,GO:0031224,GO:0034220,GO:0044425,GO:0046942,GO:0046943,GO:0051179,GO:0051234,GO:0055085,GO:0071702,GO:0071705,GO:0098656,GO:1903825,GO:1905039	ko:K15015
Mt0066_00155	Medtr8g031910		12.28	9.02	6.96	21.91	21.36	23.45	9.42	22.24	1.2394	4.24e-07	2.77e-05	Q	Belongs to the short-chain dehydrogenases reductases (SDR) family	-	GO:0003674,GO:0003824,GO:0005575,GO:0005622,GO:0005623,GO:0005737,GO:0006950,GO:0006952,GO:0008150,GO:0008152,GO:0016491,GO:0016614,GO:0016616,GO:0044424,GO:0044464,GO:0047501,GO:0050896,GO:0055114	ko:K15095
Mt0015_00069	Medtr8g006775		103.54	89.21	113.28	35.97	30.08	54.07	102.01	40.04	-1.3492	4.74e-07	3.06e-05	S	Encoded by	-	-	-
Mt0099_00042	Medtr0672s0010		3.81	2.94	4.73	0.92	1.44	1.23	3.82667	1.19667	-1.6771	4.89e-07	3.15e-05	#N/A	#N/A	#N/A	#N/A	#N/A
Mt0088_10060	Medtr7g016780		33.79	23.46	38.77	61.29	68.11	77.39	32.0067	68.93	1.1068	5.05e-07	3.24e-05	H	Belongs to the chalcone stilbene synthases family	CHS3	GO:0003674,GO:0003824,GO:0008150,GO:0008152,GO:0009058,GO:0009812,GO:0009813,GO:0016210,GO:0016740,GO:0016746,GO:0016747,GO:0071704,GO:1901576	ko:K00660
Mt0062_00030	Medtr0032s0170	NCR	6.14	3.83	4.99	1.54	0.8	1.76	4.98667	1.36667	-1.8674	5.1e-07	3.27e-05	#N/A	#N/A	#N/A	#N/A	#N/A
Mt0028_10095	Medtr8g018620		10.16	6.77	9.13	3.23	3.3	4.05	8.68667	3.52667	-1.3005	5.19e-07	3.32e-05	E	Plant lipoxygenase may be involved in a number of diverse aspects of plant physiology including growth and development, pest resistance, and senescence or responses to wounding	LOX2	-	ko:K00454,ko:K15718
Mt0012_00478	Medtr5g037630		37.02	28.18	31.58	12.21	12.19	17.42	32.26	13.94	-1.2105	5.31e-07	3.39e-05	S	TMV resistance protein	-	-	-
Mt0011_10281	Medtr7g088850		4.91	6.15	5.09	11.23	15.23	9.59	5.38333	12.0167	1.1585	5.32e-07	3.39e-05	O	Belongs to the AAA ATPase family	-	GO:0000166,GO:0003674,GO:0005488,GO:0005524,GO:0005575,GO:0005622,GO:0005623,GO:0005634,GO:0005737,GO:0005856,GO:0006810,GO:0007049,GO:0008104,GO:0008144,GO:0008150,GO:0009524,GO:0009987,GO:0015031,GO:0015833,GO:0017076,GO:0030554,GO:0032553,GO:0032555,GO:0032559,GO:0033036,GO:0035639,GO:0036094,GO:0042886,GO:0043167,GO:0043168,GO:0043226,GO:0043227,GO:0043228,GO:0043229,GO:0043231,GO:0043232,GO:…	ko:K13525
Mt0005_01158	Medtr5g027870		6.07	8.59	11.78	24.74	18.02	19.01	8.81333	20.59	1.2242	5.71e-07	3.62e-05	T	Belongs to the disease resistance NB-LRR family	-	-	ko:K13457
Mt0061_10079	Medtr4g037225		5.9	7.17	4.99	14.31	10.13	13.6	6.02	12.68	1.0747	5.82e-07	3.68e-05	Z	Belongs to the ATG8 family	-	GO:0000421,GO:0005575,GO:0005622,GO:0005623,GO:0005737,GO:0005773,GO:0005774,GO:0005776,GO:0005856,GO:0005874,GO:0006810,GO:0006914,GO:0006950,GO:0006995,GO:0007154,GO:0008104,GO:0008150,GO:0008152,GO:0009056,GO:0009267,GO:0009605,GO:0009987,GO:0009991,GO:0015031,GO:0015630,GO:0015833,GO:0016020,GO:0031090,GO:0031410,GO:0031667,GO:0031668,GO:0031669,GO:0031982,GO:0033036,GO:0033554,GO:0042594,GO:…	ko:K08341
Mt0043_10167	Medtr3g028440	NCR	14.75	14.24	14.05	5.66	6.77	8.13	14.3467	6.85333	-1.0658	5.95e-07	3.76e-05	#N/A	#N/A	#N/A	#N/A	#N/A
Mt0082_00060	Medtr6g471080		0.17	0.26	0.33	3.23	1.06	1.39	0.253333	1.89333	2.9018	6.02e-07	3.8e-05	S	YLS9-like	-	-	-
Mt0002_10287	Medtr1g013760		0.41	0.46	0.76	38.64	2.18	14.33	0.543333	18.3833	5.0804	6.09e-07	3.84e-05	K	WRKY Transcription Factor	-	-	-
Mt0013_00533	Medtr3g058820		20.62	19.49	13.1	35.29	38.13	41.1	17.7367	38.1733	1.1058	6.17e-07	3.88e-05	T	Protein of unknown function (DUF3148)	-	-	-
Mt0037_00258	Medtr8g041510		3.19	4.36	3.51	10.06	6.29	10.75	3.68667	9.03333	1.2929	6.55e-07	4.1e-05	S	maturation of SSU-rRNA from tricistronic rRNA transcript (SSU-rRNA, 5.8S rRNA, LSU-rRNA)	TSR2	GO:0000462,GO:0003674,GO:0005575,GO:0005622,GO:0005623,GO:0005634,GO:0005737,GO:0006139,GO:0006364,GO:0006396,GO:0006725,GO:0006807,GO:0008150,GO:0008152,GO:0009987,GO:0010467,GO:0016070,GO:0016072,GO:0022613,GO:0030490,GO:0034470,GO:0034641,GO:0034660,GO:0042254,GO:0042274,GO:0043170,GO:0043226,GO:0043227,GO:0043229,GO:0043231,GO:0044085,GO:0044237,GO:0044238,GO:0044424,GO:0044464,GO:0046483,GO:…	ko:K14800
Mt0089_00057	Medtr3g117800		8.95	9.68	9.19	5.26	3.24	4.51	9.27333	4.33667	-1.0965	6.57e-07	4.11e-05	G	Endo-1,4-beta-xylanase	-	GO:0000272,GO:0003674,GO:0003824,GO:0004553,GO:0005488,GO:0005575,GO:0005576,GO:0005975,GO:0005976,GO:0008150,GO:0008152,GO:0009056,GO:0009057,GO:0009987,GO:0010383,GO:0010410,GO:0016052,GO:0016787,GO:0016798,GO:0030246,GO:0031176,GO:0043170,GO:0044036,GO:0044237,GO:0044238,GO:0044260,GO:0045491,GO:0045493,GO:0071554,GO:0071704,GO:0097599,GO:1901575	-
Mt0035_10213	Medtr7g024950		0.62	1.19	1.74	11.35	3.56	4.98	1.18333	6.63	2.4862	6.61e-07	4.13e-05	S	C1 domain	-	-	-
Mt0019_10258	Medtr2g084745	NCR	23.84	24.19	24.85	10.28	10.07	14.56	24.2933	11.6367	-1.0619	6.73e-07	4.2e-05	#N/A	#N/A	#N/A	#N/A	#N/A
Mt0017_00320	Medtr3g012440		126.73	136.82	135.15	427	203.79	297.1	132.9	309.297	1.2187	6.78e-07	4.22e-05	V	carboxylesterase 15	-	GO:0003674,GO:0003824,GO:0008150,GO:0008152,GO:0009056,GO:0016787,GO:0016788,GO:0052689	-
Mt0032_10025	Medtr6g042490		1.72	2.91	2.66	6.31	5.07	8.43	2.43	6.60333	1.4422	6.84e-07	4.24e-05	S	Pistil-specific extensin-like protein	-	GO:0001101,GO:0005575,GO:0005576,GO:0005618,GO:0005623,GO:0005886,GO:0005911,GO:0008150,GO:0009505,GO:0009506,GO:0009719,GO:0009725,GO:0009753,GO:0010033,GO:0016020,GO:0030054,GO:0030312,GO:0042221,GO:0044464,GO:0048580,GO:0050789,GO:0050793,GO:0050896,GO:0051239,GO:0055044,GO:0065007,GO:0071944,GO:0080050,GO:1901700,GO:2000026,GO:2000033,GO:2000034,GO:2000241,GO:2000280	-
Mt0010_00878	Medtr5g094570	CP450	5.32	3.87	1.64	10.92	21.87	18.25	3.61	17.0133	2.2366	6.92e-07	4.28e-05	Q	Cytochrome p450	-	GO:0003674,GO:0003824,GO:0004497,GO:0005488,GO:0005506,GO:0005575,GO:0008150,GO:0008152,GO:0009058,GO:0016020,GO:0016491,GO:0016705,GO:0016709,GO:0019748,GO:0020037,GO:0043167,GO:0043169,GO:0044550,GO:0046872,GO:0046906,GO:0046914,GO:0048037,GO:0055114,GO:0097159,GO:1901363	ko:K00512,ko:K07408,ko:K07418
Mt0036_00049	Medtr7g112560		0.75	0.56	0.72	1.88	2.12	1.99	0.676667	1.99667	1.5611	7.3e-07	4.5e-05	S	f-box protein	-	GO:0003674,GO:0005488,GO:0030246	-
Mt0014_10446	Medtr4g026780		1.75	1.59	2.59	5.51	4.01	4.71	1.97667	4.74333	1.2628	7.65e-07	4.69e-05	U	Vesicle-associated membrane protein-associated protein	VAP27-1	GO:0000322,GO:0000325,GO:0000326,GO:0005575,GO:0005622,GO:0005623,GO:0005634,GO:0005737,GO:0005773,GO:0005774,GO:0005783,GO:0005789,GO:0005829,GO:0005886,GO:0006605,GO:0006810,GO:0006886,GO:0007154,GO:0007165,GO:0008104,GO:0008150,GO:0009705,GO:0009987,GO:0012505,GO:0015031,GO:0015833,GO:0016020,GO:0016021,GO:0016032,GO:0023052,GO:0031090,GO:0031224,GO:0031984,GO:0032586,GO:0033036,GO:0034613,GO:…	-
Mt0073_10020	Medtr6g471740		3.64	4.26	2.43	0.95	0.19	0.56	3.44333	0.566667	-2.6032	7.8e-07	4.77e-05	#N/A	#N/A	#N/A	#N/A	#N/A
Mt0028_10329	Medtr1g036710		7.62	9.78	8.96	3.32	3.56	4.78	8.78667	3.88667	-1.1768	8.04e-07	4.91e-05	S	ribonuclease H protein	-	-	-
Mt0047_10103	Medtr2g048885	NCR	26.49	27.46	25.31	10.12	9.49	15.13	26.42	11.58	-1.19	8.33e-07	5.07e-05	#N/A	#N/A	#N/A	#N/A	#N/A
Mt0049_10140	Medtr3g051460		9.61	9.19	15.33	24.52	26.68	21.53	11.3767	24.2433	1.0915	8.5e-07	5.17e-05	O	Peptide methionine sulfoxide	-	GO:0003674,GO:0003824,GO:0005575,GO:0005622,GO:0005623,GO:0005737,GO:0005739,GO:0005829,GO:0006464,GO:0006807,GO:0006950,GO:0006979,GO:0008113,GO:0008150,GO:0008152,GO:0009314,GO:0009416,GO:0009507,GO:0009526,GO:0009532,GO:0009536,GO:0009570,GO:0009628,GO:0009719,GO:0009725,GO:0009735,GO:0009941,GO:0009987,GO:0010033,GO:0016491,GO:0016667,GO:0016671,GO:0019538,GO:0031967,GO:0031975,GO:0033554,GO:…	ko:K07304
Mt0024_10374	Medtr2g090945		0.03	0.13	0	1.2	0.67	0.96	0.0533333	0.943333	4.1447	9.09e-07	5.51e-05	#N/A	#N/A	#N/A	#N/A	#N/A
Mt0005_01085	Medtr5g026730		0.41	0.76	0.89	5.6	1.89	2.95	0.686667	3.48	2.3414	9.67e-07	5.82e-05	O	finger protein	-	GO:0003674,GO:0003824,GO:0004842,GO:0005488,GO:0005575,GO:0006464,GO:0006508,GO:0006511,GO:0006807,GO:0008150,GO:0008152,GO:0009056,GO:0009057,GO:0009987,GO:0010498,GO:0016020,GO:0016021,GO:0016567,GO:0016740,GO:0019538,GO:0019787,GO:0019941,GO:0030163,GO:0031224,GO:0032446,GO:0036211,GO:0043161,GO:0043167,GO:0043169,GO:0043170,GO:0043412,GO:0043632,GO:0044237,GO:0044238,GO:0044248,GO:0044257,GO:…	-
Mt0017_10671	Medtr3g021430		0.58	0.76	0.53	11.14	1.57	3.78	0.623333	5.49667	3.1405	9.9e-07	5.93e-05	D	O-methyltransferase activity	-	-	ko:K13066,ko:K13262,ko:K16040,ko:K21553
Mt0001_01787	Medtr4g094720		0.07	0.1	0	0.8	1.96	0.73	0.0566667	1.16333	4.3596	1e-06	5.98e-05	O	1-Cys peroxiredoxin	-	GO:0000003,GO:0001101,GO:0003006,GO:0003674,GO:0003824,GO:0004601,GO:0005575,GO:0005622,GO:0005623,GO:0005634,GO:0005737,GO:0006950,GO:0007275,GO:0008150,GO:0008152,GO:0008379,GO:0009269,GO:0009414,GO:0009415,GO:0009628,GO:0009636,GO:0009791,GO:0009987,GO:0010035,GO:0010154,GO:0010162,GO:0010231,GO:0010431,GO:0016209,GO:0016491,GO:0016684,GO:0019725,GO:0021700,GO:0022414,GO:0022611,GO:0032501,GO:…	ko:K11188
Mt0026_10325	Medtr7g074220		7.99	12.69	9.62	4.15	2.34	4.21	10.1	3.56667	-1.5017	1.01e-06	6.04e-05	-	-	-	-	-
Mt0063_00129	Medtr5g078020		1.68	2.05	2.1	7.97	3.85	4.81	1.94333	5.54333	1.5122	1.04e-06	6.21e-05	T	Nudix hydrolase	-	GO:0003674,GO:0003824,GO:0005488,GO:0005575,GO:0005622,GO:0005623,GO:0005634,GO:0005737,GO:0005739,GO:0016787,GO:0016817,GO:0016818,GO:0043167,GO:0043169,GO:0043226,GO:0043227,GO:0043229,GO:0043231,GO:0044424,GO:0044444,GO:0044464,GO:0046872	ko:K07766
Mt0004_00697	Medtr1g066530		1.17	1.55	3.91	22.98	7.5	9.12	2.21	13.2	2.5784	1.05e-06	6.23e-05	-	-	-	-	-
Mt0064_00168	Medtr4g011690		3.05	3.11	3.02	1.48	0.99	0.8	3.06	1.09	-1.4892	1.06e-06	6.28e-05	Q	Belongs to the iron ascorbate-dependent oxidoreductase family	-	GO:0001101,GO:0003674,GO:0003824,GO:0005488,GO:0005575,GO:0006082,GO:0006629,GO:0006720,GO:0006721,GO:0006790,GO:0006807,GO:0007154,GO:0007165,GO:0008150,GO:0008152,GO:0008299,GO:0008610,GO:0009058,GO:0009314,GO:0009416,GO:0009628,GO:0009685,GO:0009686,GO:0009719,GO:0009725,GO:0009739,GO:0009740,GO:0009755,GO:0009987,GO:0010033,GO:0010476,GO:0010817,GO:0016020,GO:0016053,GO:0016101,GO:0016102,GO:…	-
Mt0009_00560	Medtr8g098620		0.93	0.89	0.89	2.18	3.46	2.42	0.903333	2.68667	1.5725	1.06e-06	6.29e-05	#N/A	#N/A	#N/A	#N/A	#N/A
Mt0043_10098	Medtr3g026785		0.51	0.76	0.85	2.06	2.82	1.92	0.706667	2.26667	1.6815	1.08e-06	6.35e-05	#N/A	#N/A	#N/A	#N/A	#N/A
Mt0073_00061	Medtr2g450830		0.51	0.73	0.46	2.25	1.89	1.53	0.566667	1.89	1.7378	1.09e-06	6.43e-05	T	TMV resistance protein N-like	-	GO:0000166,GO:0002376,GO:0003674,GO:0005488,GO:0005524,GO:0005575,GO:0005622,GO:0005623,GO:0005737,GO:0006950,GO:0006952,GO:0006955,GO:0007154,GO:0007165,GO:0008144,GO:0008150,GO:0008219,GO:0009626,GO:0009987,GO:0012501,GO:0017076,GO:0023052,GO:0030554,GO:0032553,GO:0032555,GO:0032559,GO:0033554,GO:0034050,GO:0035639,GO:0036094,GO:0043167,GO:0043168,GO:0043531,GO:0044424,GO:0044464,GO:0045087,GO:…	-
Mt0012_10017	Medtr5g048160		8.37	5.78	8.24	15.29	32.97	19.64	7.46333	22.6333	1.6006	1.09e-06	6.43e-05	S	f-box protein	-	-	-
Mt0017_10613	Medtr3g020340	PDF1.5 defensin-like	41.48	38.95	47.4	15.17	21.61	22.43	42.61	19.7367	-1.1103	1.16e-06	6.8e-05	T	Belongs to the DEFL family	-	-	-
Mt0010_10422	Medtr5g086670		0.24	0.17	0.23	1.26	0.9	1.09	0.213333	1.08333	2.3443	1.19e-06	6.96e-05	S	thylakoid lumenal P17.1 protein	-	-	-
Mt0095_10029	Medtr2g018175		0.17	0.13	0.49	1.2	3.34	1.92	0.263333	2.15333	3.0316	1.21e-06	7.07e-05	S	Senescence regulator	-	-	-
Mt0002_11524	Medtr1g043350	ERF1	0.58	0.5	0.89	4.15	1.76	2.39	0.656667	2.76667	2.0749	1.24e-06	7.22e-05	K	ethylene-responsive transcription factor	-	GO:0000160,GO:0001101,GO:0003674,GO:0003676,GO:0003677,GO:0003700,GO:0005488,GO:0005575,GO:0005622,GO:0005623,GO:0005634,GO:0006139,GO:0006351,GO:0006355,GO:0006725,GO:0006807,GO:0006950,GO:0006952,GO:0007154,GO:0007165,GO:0008150,GO:0008152,GO:0009058,GO:0009059,GO:0009719,GO:0009723,GO:0009725,GO:0009753,GO:0009755,GO:0009867,GO:0009873,GO:0009889,GO:0009987,GO:0010033,GO:0010467,GO:0010468,GO:…	ko:K14516
Mt0003_00125	Medtr4g053530		0.24	0.2	0.23	1.11	0.99	1.09	0.223333	1.06333	2.2513	1.24e-06	7.22e-05	KLO	poly ADP-ribose polymerase	PARP3	GO:0003674,GO:0003676,GO:0003677,GO:0003824,GO:0003909,GO:0003910,GO:0003950,GO:0005488,GO:0005575,GO:0005622,GO:0005623,GO:0005634,GO:0005737,GO:0006139,GO:0006259,GO:0006260,GO:0006261,GO:0006266,GO:0006271,GO:0006273,GO:0006281,GO:0006464,GO:0006471,GO:0006725,GO:0006807,GO:0006950,GO:0006974,GO:0008150,GO:0008152,GO:0009058,GO:0009059,GO:0009987,GO:0016070,GO:0016740,GO:0016757,GO:0016763,GO:…	ko:K10798
Mt0086_10073	Medtr6g088415		3.33	4.82	4	1.54	0.96	1.73	4.05	1.41	-1.5222	1.26e-06	7.31e-05	#N/A	#N/A	#N/A	#N/A	#N/A
Mt0006_01072	Medtr3g065690	NCR	33.28	26.23	40.21	16.15	12.63	17.35	33.24	15.3767	-1.1122	1.29e-06	7.45e-05	#N/A	#N/A	#N/A	#N/A	#N/A
Mt0090_00069	Medtr1g041605		0.24	0.36	0.33	1.14	1.51	1.26	0.31	1.30333	2.0719	1.3e-06	7.49e-05	#N/A	#N/A	#N/A	#N/A	#N/A
Mt0121_00045	Medtr4g045633	NCR	27.27	22.86	29.15	7.69	6.22	13.17	26.4267	9.02667	-1.5497	1.33e-06	7.67e-05	#N/A	#N/A	#N/A	#N/A	#N/A
Mt0013_10121	Medtr3g467600		194.18	183.73	212.78	78.37	50.64	103.37	196.897	77.46	-1.3459	1.39e-06	7.97e-05	Q	Belongs to the peroxidase family. Classical plant (class III) peroxidase subfamily	-	-	ko:K00430
Mt0002_01768	Medtr1g047960		0.14	0.07	0.66	2.83	4.1	1.82	0.29	2.91667	3.3302	1.55e-06	8.8e-05	S	Polygalacturonase	pgip	GO:0003674,GO:0004857,GO:0005575,GO:0005576,GO:0005618,GO:0005622,GO:0005623,GO:0005737,GO:0005794,GO:0005911,GO:0006950,GO:0006952,GO:0008150,GO:0009505,GO:0009506,GO:0012505,GO:0016020,GO:0030054,GO:0030234,GO:0030312,GO:0043086,GO:0043226,GO:0043227,GO:0043229,GO:0043231,GO:0044092,GO:0044424,GO:0044444,GO:0044464,GO:0048046,GO:0050790,GO:0050896,GO:0055044,GO:0065007,GO:0065009,GO:0071944,GO:…	-
Mt0017_00231	Medtr3g010490	NCR101-TC37320	166.67	161.5	175.62	72.4	54.2	96.77	167.93	74.4567	-1.1734	1.57e-06	8.89e-05	#N/A	#N/A	#N/A	#N/A	#N/A
Mt0032_00292	Medtr6g452990		18.7	14.77	27.51	47.48	43.07	39.74	20.3267	43.43	1.0953	1.58e-06	8.94e-05	O	Heat shock protein	-	GO:0000166,GO:0003674,GO:0005488,GO:0005515,GO:0005524,GO:0005575,GO:0005622,GO:0005623,GO:0005737,GO:0006457,GO:0006950,GO:0008144,GO:0008150,GO:0009987,GO:0017076,GO:0030554,GO:0032553,GO:0032555,GO:0032559,GO:0035639,GO:0036094,GO:0043167,GO:0043168,GO:0044424,GO:0044464,GO:0050896,GO:0051082,GO:0097159,GO:0097367,GO:1901265,GO:1901363	ko:K04079
Mt0033_10032	Medtr6g028100		3.02	4.76	6.04	26.31	11.74	10.91	4.60667	16.32	1.8248	1.72e-06	9.67e-05	G	Lysosomal beta glucosidase-like	-	-	ko:K01188,ko:K05349
Mt0048_10149	Medtr2g072970		2.5	2.05	1.84	0.49	0.61	0.76	2.13	0.62	-1.7805	1.77e-06	9.9e-05	#N/A	#N/A	#N/A	#N/A	#N/A
Mt0026_00240	Medtr7g072270		11.42	12.32	9.78	32.09	17	28.13	11.1733	25.74	1.204	1.84e-06	0.000102971	S	LURP-one-related	-	-	-
Mt0264_10004	Medtr0040s0030	NCR	0.82	1.39	1.94	0.18	0.29	0.17	1.38333	0.213333	-2.697	1.85e-06	0.000103124	#N/A	#N/A	#N/A	#N/A	#N/A
Mt0020_10334	Medtr8g078200		5.39	6.77	6.86	18.68	10.2	13	6.34	13.96	1.1387	1.86e-06	0.000103642	I	elongation of fatty acids protein	-	GO:0000038,GO:0001101,GO:0003674,GO:0003824,GO:0004312,GO:0005575,GO:0005622,GO:0005623,GO:0005737,GO:0005783,GO:0005789,GO:0006082,GO:0006629,GO:0006631,GO:0006633,GO:0006643,GO:0006665,GO:0006807,GO:0008150,GO:0008152,GO:0008610,GO:0009058,GO:0009719,GO:0009725,GO:0009737,GO:0009922,GO:0009987,GO:0010033,GO:0012505,GO:0016020,GO:0016021,GO:0016053,GO:0016740,GO:0016746,GO:0016747,GO:0019367,GO:…	-
Mt0137_10042	Medtr2g040690		36.26	28.61	111.87	274.6	338.48	202.72	58.9133	271.933	2.2066	1.9e-06	0.000105436	G	chitinase activity	-	GO:0000272,GO:0003674,GO:0003824,GO:0004553,GO:0004568,GO:0004857,GO:0005975,GO:0005976,GO:0006022,GO:0006026,GO:0006030,GO:0006032,GO:0006040,GO:0006807,GO:0008150,GO:0008152,GO:0009056,GO:0009057,GO:0009987,GO:0015066,GO:0016052,GO:0016787,GO:0016798,GO:0017144,GO:0030234,GO:0042737,GO:0043086,GO:0043170,GO:0044092,GO:0044237,GO:0044238,GO:0044248,GO:0046348,GO:0050790,GO:0065007,GO:0065009,GO:…	ko:K01183
Mt0006_10456	Medtr3g080370		5.49	6.41	6.57	3.35	2.41	3.25	6.15667	3.00333	-1.0356	1.91e-06	0.000106118	S	F-box kelch-repeat protein	-	GO:0003674,GO:0003824,GO:0004842,GO:0005575,GO:0005622,GO:0005623,GO:0005634,GO:0006464,GO:0006508,GO:0006511,GO:0006807,GO:0008150,GO:0008152,GO:0009056,GO:0009057,GO:0009987,GO:0010498,GO:0016567,GO:0016740,GO:0019538,GO:0019787,GO:0019941,GO:0030163,GO:0031146,GO:0032446,GO:0036211,GO:0043161,GO:0043170,GO:0043226,GO:0043227,GO:0043229,GO:0043231,GO:0043412,GO:0043632,GO:0044237,GO:0044238,GO:…	-
Mt0010_10918	Medtr5g097220		1.3	1.32	1.25	0.28	0.29	0.36	1.29	0.31	-2.057	1.98e-06	0.000109676	S	F-box and associated interaction domains-containing protein	-	-	-
Mt0033_10029	Medtr6g028140		7.07	7.6	6.14	21.05	11.13	15.09	6.93667	15.7567	1.1836	2.04e-06	0.000112431	U	Belongs to the syntaxin family	-	GO:0000149,GO:0003674,GO:0005484,GO:0005488,GO:0005515,GO:0005575,GO:0005622,GO:0005623,GO:0005737,GO:0005886,GO:0006810,GO:0006886,GO:0006887,GO:0006906,GO:0006996,GO:0008104,GO:0008150,GO:0009987,GO:0012505,GO:0015031,GO:0015833,GO:0016020,GO:0016021,GO:0016043,GO:0016050,GO:0016192,GO:0022406,GO:0031201,GO:0031224,GO:0032940,GO:0032991,GO:0033036,GO:0034613,GO:0042886,GO:0044424,GO:0044425,GO:…	ko:K08486
Mt0138_00008	Medtr6g057520		43.98	38.36	40.61	16.09	16.1	24.15	40.9833	18.78	-1.1258	2.04e-06	0.000112718	#N/A	#N/A	#N/A	#N/A	#N/A
Mt0020_00074	Medtr8g072210		0.72	0.56	0.76	1.88	1.8	2.59	0.68	2.09	1.6199	2.11e-06	0.000115718	E	Long-chain-alcohol oxidase	-	GO:0000166,GO:0003674,GO:0003824,GO:0005488,GO:0005575,GO:0005622,GO:0005623,GO:0008150,GO:0008152,GO:0016020,GO:0016021,GO:0016491,GO:0016614,GO:0016899,GO:0031224,GO:0036094,GO:0043167,GO:0043168,GO:0044425,GO:0044464,GO:0046577,GO:0048037,GO:0050660,GO:0050662,GO:0055114,GO:0097159,GO:1901265,GO:1901363	ko:K17756
Mt0015_00588	Medtr8g045030		0	0	0	0.52	0.35	0.7	0.001	0.523333	9.0316	2.15e-06	0.00011759	T	1-aminocyclopropane-1-carboxylate	ACS	GO:0000003,GO:0003006,GO:0003674,GO:0003824,GO:0005488,GO:0006082,GO:0006520,GO:0006807,GO:0007275,GO:0007568,GO:0008144,GO:0008150,GO:0008152,GO:0008652,GO:0009058,GO:0009692,GO:0009693,GO:0009835,GO:0009987,GO:0010154,GO:0010817,GO:0016053,GO:0016829,GO:0016846,GO:0016847,GO:0018871,GO:0019752,GO:0019842,GO:0021700,GO:0022414,GO:0030170,GO:0032501,GO:0032502,GO:0032787,GO:0036094,GO:0042218,GO:…	ko:K20772
Mt0168_00016	Medtr6g071410		0.03	0.07	0.07	1.63	0.51	0.76	0.0566667	0.966667	4.0924	2.15e-06	0.00011759	S	YLS9-like	-	-	-
Mt0001_01321	Medtr4g104730		12.87	16.72	22.75	8.83	4.81	5.9	17.4467	6.51333	-1.4215	2.2e-06	0.000120463	S	High-affinity nitrate transporter	NAR2.2	GO:0001101,GO:0003674,GO:0005215,GO:0005575,GO:0005623,GO:0005886,GO:0006082,GO:0006807,GO:0006810,GO:0006811,GO:0006820,GO:0006950,GO:0008150,GO:0008152,GO:0008509,GO:0009611,GO:0009987,GO:0010035,GO:0010167,GO:0015075,GO:0015103,GO:0015112,GO:0015318,GO:0015698,GO:0015706,GO:0016020,GO:0016021,GO:0022857,GO:0031224,GO:0034220,GO:0042126,GO:0042128,GO:0042221,GO:0043436,GO:0044237,GO:0044281,GO:…	-
Mt0020_00091	Medtr8g072510		20.82	23.03	20.29	63.57	31.01	59.02	21.38	51.2	1.2599	2.22e-06	0.000121013	V	ankyrin repeat protein	-	-	-
Mt0048_10082	Medtr2g075690		0.34	0.13	0.1	4.09	0.77	1.82	0.19	2.22667	3.5508	2.22e-06	0.000121013	K	WRKY transcription factor	-	GO:0001101,GO:0002218,GO:0002252,GO:0002253,GO:0002376,GO:0002682,GO:0002684,GO:0003674,GO:0003676,GO:0003677,GO:0003700,GO:0005488,GO:0005575,GO:0005622,GO:0005623,GO:0005634,GO:0006139,GO:0006351,GO:0006355,GO:0006725,GO:0006807,GO:0006950,GO:0006952,GO:0006955,GO:0007154,GO:0007165,GO:0008150,GO:0008152,GO:0009058,GO:0009059,GO:0009605,GO:0009607,GO:0009617,GO:0009620,GO:0009627,GO:0009682,GO:…	-
Mt0038_20038	Medtr8g064100		7.07	6.18	10.37	2.8	3.56	3.09	7.87333	3.15	-1.3216	2.25e-06	0.000122479	#N/A	#N/A	#N/A	#N/A	#N/A
Mt0042_10202	Medtr6g075030		3.22	2.78	2.92	7.66	5.07	5.64	2.97333	6.12333	1.0422	2.27e-06	0.000123202	O	Toll - interleukin 1 - resistance	-	-	-
Mt0003_01407	Medtr4g083140		0.62	0.4	1.35	5.88	2.5	3.55	0.79	3.97667	2.3316	2.3e-06	0.000125059	-	-	-	-	-
Mt0002_00666	Medtr1g022245		6.79	7	3.94	16.95	11.54	15.33	5.91	14.6067	1.3054	2.7e-06	0.000144099	O	Belongs to the AAA ATPase family	-	-	ko:K08900
Mt0055_00004	Medtr2g040570		0.45	0.63	0.56	3.35	1.22	2.62	0.546667	2.39667	2.1323	2.73e-06	0.000145497	A	Cleavage and polyadenylation specificity factor subunit	-	GO:0003674,GO:0003676,GO:0003723,GO:0003729,GO:0003824,GO:0005488,GO:0005575,GO:0005622,GO:0005623,GO:0005634,GO:0005654,GO:0005849,GO:0006139,GO:0006378,GO:0006396,GO:0006397,GO:0006725,GO:0006807,GO:0008150,GO:0008152,GO:0009987,GO:0010467,GO:0016070,GO:0016071,GO:0016787,GO:0031123,GO:0031124,GO:0031974,GO:0031981,GO:0032991,GO:0034641,GO:0043167,GO:0043169,GO:0043170,GO:0043226,GO:0043227,GO:…	ko:K14397
Mt0013_00713	Medtr3g055570	MtCaML1 &3	88.07	106.09	99.43	41.32	33.06	57.49	97.8633	43.9567	-1.1547	2.78e-06	0.000147843	T	Calmodulin mediates the control of a large number of enzymes, ion channels and other proteins by Ca(2 ). Among the enzymes to be stimulated by the calmodulin-Ca(2 ) complex are a number of protein kinases and phosphatases	-	-	ko:K02183
Mt0057_00083	Medtr1g105820		0.51	0.76	1.48	2.68	3.98	3.58	0.916667	3.41333	1.8967	2.79e-06	0.000147965	T	Cysteine-rich receptor-like protein kinase	-	GO:0000166,GO:0001101,GO:0003674,GO:0003824,GO:0004672,GO:0004674,GO:0005488,GO:0005524,GO:0005575,GO:0005622,GO:0005623,GO:0005737,GO:0005773,GO:0005886,GO:0006464,GO:0006468,GO:0006793,GO:0006796,GO:0006807,GO:0008144,GO:0008150,GO:0008152,GO:0009719,GO:0009725,GO:0009737,GO:0009987,GO:0010033,GO:0016020,GO:0016021,GO:0016301,GO:0016310,GO:0016740,GO:0016772,GO:0016773,GO:0017076,GO:0019538,GO:…	ko:K04733
Mt0003_10096	Medtr4g052300		7.82	5.85	4.89	12.06	14.82	19.17	6.18667	15.35	1.311	2.81e-06	0.000149281	Q	Secoisolariciresinol dehydrogenase-like	-	-	-
Mt0017_10439	Medtr3g015430		0.48	0.53	1.02	4.28	1.96	2.29	0.676667	2.84333	2.0711	2.86e-06	0.000151229	#N/A	#N/A	#N/A	#N/A	#N/A
Mt0008_10852	Medtr5g072450	NCR100-TC32805 NCRb	5.73	6.87	5.78	1.78	1.99	3.15	6.12667	2.30667	-1.4093	2.91e-06	0.0001538	#N/A	#N/A	#N/A	#N/A	#N/A
Mt0012_10319	Medtr5g041010		1.89	2.21	2.1	6.34	3.62	4.48	2.06667	4.81333	1.2197	3.03e-06	0.000159892	A	Belongs to the RNase T2 family	-	GO:0003674,GO:0003676,GO:0003723,GO:0003824,GO:0004518,GO:0004519,GO:0004521,GO:0004540,GO:0005488,GO:0006139,GO:0006725,GO:0006807,GO:0008150,GO:0008152,GO:0009987,GO:0016070,GO:0016787,GO:0016788,GO:0016892,GO:0016894,GO:0033897,GO:0034641,GO:0043170,GO:0044237,GO:0044238,GO:0046483,GO:0071704,GO:0090304,GO:0090305,GO:0090501,GO:0090502,GO:0097159,GO:0140098,GO:1901360,GO:1901363	ko:K01166
Mt0042_10221	Medtr6g074820		0.96	1.16	0.85	5.72	1.83	5.57	0.99	4.37333	2.1432	3.2e-06	0.000168315	O	Toll - interleukin 1 - resistance	-	-	-
Mt0056_10059	Medtr2g044440		0.75	0.83	0.92	0.09	0.13	0	0.833333	0.0733333	-3.5064	3.21e-06	0.000168419	O	E3 ubiquitin-protein ligase	-	GO:0000151,GO:0000209,GO:0003674,GO:0003824,GO:0004842,GO:0005488,GO:0005515,GO:0005575,GO:0005622,GO:0005623,GO:0005737,GO:0005794,GO:0005886,GO:0006464,GO:0006807,GO:0008150,GO:0008152,GO:0009893,GO:0009894,GO:0009896,GO:0009987,GO:0010604,GO:0012505,GO:0012506,GO:0016020,GO:0016021,GO:0016567,GO:0016740,GO:0019222,GO:0019538,GO:0019787,GO:0019899,GO:0030162,GO:0030659,GO:0031090,GO:0031224,GO:…	ko:K11975
Mt0008_10625	Medtr5g067240		8.3	7.7	9.95	22.71	12.96	17.91	8.65	17.86	1.046	3.23e-06	0.000169355	G	Histidine phosphatase superfamily (branch 1)	-	-	-
Mt0011_10590	Medtr2g076093		0.41	0.53	0.49	0	0	0	0.476667	0.001	-8.8968	3.26e-06	0.00017072	#N/A	#N/A	#N/A	#N/A	#N/A
Mt0003_11510	Medtr4g084970		3.57	3.2	2.95	9.38	5.52	6.6	3.24	7.16667	1.1453	3.27e-06	0.000170857	S	leucine-rich repeat extensin-like protein	-	-	-
Mt0068_10100	Medtr2g022380		30.91	28.25	32.96	128.21	50.19	71.59	30.7067	83.33	1.4403	3.28e-06	0.000171251	O	Belongs to the peptidase A1 family	-	-	-
Mt0016_10152	Medtr8g445380		13.86	11.33	9.59	20.74	22.35	27.4	11.5933	23.4967	1.0192	3.32e-06	0.000172699	#N/A	#N/A	#N/A	#N/A	#N/A
Mt0003_10658	Medtr4g065390	NCR	24.6	23.09	30.89	14.89	9.01	13.04	26.1933	12.3133	-1.089	3.33e-06	0.000172847	#N/A	#N/A	#N/A	#N/A	#N/A
Mt0011_00687	Medtr7g080850	NCR	4.87	4.26	4.79	2.34	1.44	2.19	4.64	1.99	-1.2214	3.33e-06	0.000172861	#N/A	#N/A	#N/A	#N/A	#N/A
Mt0008_10368	Medtr5g061740		1.44	1.69	1.84	4.09	2.89	4.25	1.65667	3.74333	1.176	3.45e-06	0.000178476	K	MADS-box transcription factor	-	GO:0000003,GO:0000976,GO:0000977,GO:0001012,GO:0001067,GO:0001558,GO:0003002,GO:0003006,GO:0003674,GO:0003676,GO:0003677,GO:0003690,GO:0003700,GO:0005488,GO:0005515,GO:0005575,GO:0005622,GO:0005623,GO:0005634,GO:0006139,GO:0006351,GO:0006355,GO:0006357,GO:0006725,GO:0006807,GO:0007275,GO:0007389,GO:0008150,GO:0008152,GO:0009058,GO:0009059,GO:0009555,GO:0009653,GO:0009791,GO:0009889,GO:0009891,GO:…	ko:K09260
Mt0048_10142	Medtr2g073170	NCR	77.54	61.52	77.14	25.17	23.47	40.41	72.0667	29.6833	-1.2797	3.5e-06	0.000180752	#N/A	#N/A	#N/A	#N/A	#N/A
Mt0032_10282	Medtr0088s0100		17.05	15.83	20.78	135.13	29.12	65.32	17.8867	76.5233	2.097	3.57e-06	0.000184104	E	Belongs to the arginase family	ARG1	GO:0000050,GO:0003674,GO:0003824,GO:0004053,GO:0005488,GO:0005575,GO:0005622,GO:0005623,GO:0005737,GO:0005739,GO:0006082,GO:0006520,GO:0006525,GO:0006527,GO:0006560,GO:0006570,GO:0006576,GO:0006591,GO:0006595,GO:0006596,GO:0006725,GO:0006807,GO:0006950,GO:0006952,GO:0008150,GO:0008152,GO:0008783,GO:0009056,GO:0009058,GO:0009063,GO:0009064,GO:0009065,GO:0009072,GO:0009308,GO:0009309,GO:0009445,GO:…	ko:K01476
Mt0018_00457	Medtr2g035190		22.92	22.27	51.05	254.51	83.79	90.36	32.08	142.887	2.1551	3.63e-06	0.000186917	S	Major allergen Pru	-	GO:0006950,GO:0006952,GO:0008150,GO:0009607,GO:0050896	-
Mt0020_00134	Medtr8g073770		5.28	4.33	9.16	17.97	22.67	12.71	6.25667	17.7833	1.5071	3.8e-06	0.000194647	S	Dirigent proteins impart stereoselectivity on the phenoxy radical-coupling reaction, yielding optically active lignans from two molecules of coniferyl alcohol in the biosynthesis of lignans, flavonolignans, and alkaloids and thus plays a central role in plant secondary metabolism	-	-	-
Mt0004_01102	Medtr1g075500	NCR	2.5	2.08	3.22	0.62	0.67	1.06	2.6	0.783333	-1.7308	3.84e-06	0.000196427	#N/A	#N/A	#N/A	#N/A	#N/A
Mt0001_11157	Medtr4g108210		2.71	2.21	2.53	5.54	4.1	5.84	2.48333	5.16	1.0551	3.89e-06	0.000198778	I	ABC transporter A family member	-	-	-
Mt0056_10028	Medtr2g045280		6.62	3.87	4.5	1.75	2.02	1.49	4.99667	1.75333	-1.5109	3.91e-06	0.000199378	F	deaminase	-	GO:0003674,GO:0003824,GO:0005488,GO:0006139,GO:0006144,GO:0006145,GO:0006147,GO:0006725,GO:0006807,GO:0008150,GO:0008152,GO:0008270,GO:0008892,GO:0009056,GO:0009112,GO:0009451,GO:0009987,GO:0016070,GO:0016787,GO:0016810,GO:0016814,GO:0019239,GO:0019439,GO:0034641,GO:0043167,GO:0043169,GO:0043170,GO:0043412,GO:0044237,GO:0044238,GO:0044248,GO:0044270,GO:0044281,GO:0046098,GO:0046113,GO:0046483,GO:…	-
Mt0069_00081	Medtr2g451260		1.58	1.22	0.89	0.15	0.1	0.3	1.23	0.183333	-2.7461	3.96e-06	0.000201508	#N/A	#N/A	#N/A	#N/A	#N/A
Mt0072_10115	Medtr2g062900	NCR	5.21	3.5	6.17	1.54	0.93	1.99	4.96	1.48667	-1.7383	4.01e-06	0.000203151	#N/A	#N/A	#N/A	#N/A	#N/A
Mt0010_10401	Medtr5g085980		10.26	10.9	15.89	25.66	29.66	20.1	12.35	25.14	1.0255	4.18e-06	0.000211586	-	-	-	-	-
Mt0026_00200	Medtr7g071345	NCR	34.51	31.29	48.75	17.2	19.21	19.97	38.1833	18.7933	-1.0227	4.21e-06	0.000212303	#N/A	#N/A	#N/A	#N/A	#N/A
Mt0007_00775	Medtr3g104920		3.29	2.64	2.89	10.03	5.48	5.97	2.94	7.16	1.2841	4.22e-06	0.000212756	M	Mechanosensitive ion channel protein 10-like	-	GO:0000302,GO:0003674,GO:0005215,GO:0005575,GO:0005623,GO:0005886,GO:0006810,GO:0006811,GO:0006820,GO:0006950,GO:0006979,GO:0007275,GO:0007568,GO:0008150,GO:0008219,GO:0008381,GO:0009581,GO:0009582,GO:0009605,GO:0009612,GO:0009628,GO:0009987,GO:0010150,GO:0012501,GO:0015267,GO:0016020,GO:0016021,GO:0022803,GO:0022836,GO:0022857,GO:0031224,GO:0032501,GO:0032502,GO:0033554,GO:0034599,GO:0034614,GO:…	ko:K22048
Mt0088_00049	Medtr7g016800		39.66	27.75	20.91	59.35	76.93	92.16	29.44	76.1467	1.371	4.34e-06	0.000218271	H	Belongs to the chalcone stilbene synthases family	CHS3	GO:0003674,GO:0003824,GO:0008150,GO:0008152,GO:0009058,GO:0009812,GO:0009813,GO:0016210,GO:0016740,GO:0016746,GO:0016747,GO:0071704,GO:1901576	ko:K00660
Mt0008_00571	Medtr5g065080		1.72	2.02	1.71	0.74	0.51	0.5	1.81667	0.583333	-1.6389	4.61e-06	0.00023054	S	purine permease	-	GO:0003674,GO:0005215,GO:0005337,GO:0005345,GO:0005575,GO:0005623,GO:0005886,GO:0005887,GO:0006810,GO:0006863,GO:0008150,GO:0009914,GO:0010184,GO:0010817,GO:0015205,GO:0015211,GO:0015851,GO:0015858,GO:0015860,GO:0015931,GO:0015932,GO:0016020,GO:0016021,GO:0022857,GO:0031224,GO:0031226,GO:0044425,GO:0044459,GO:0044464,GO:0051179,GO:0051234,GO:0055085,GO:0065007,GO:0065008,GO:0071702,GO:0071705,GO:…	-
Mt0008_00493	Medtr5g063580	NCR026-TC42818	2.26	1.26	2.17	0.43	0.45	0.56	1.89667	0.48	-1.9824	4.62e-06	0.000230934	#N/A	#N/A	#N/A	#N/A	#N/A
Mt0015_10498	Medtr8g447230		7	8.26	9.16	27.08	12.03	21.93	8.14	20.3467	1.3217	4.86e-06	0.000241311	S	spindle assembly checkpoint	LEKR1	GO:0000003,GO:0000226,GO:0003006,GO:0005575,GO:0005622,GO:0005623,GO:0005634,GO:0005737,GO:0005815,GO:0005816,GO:0005856,GO:0006996,GO:0007010,GO:0007017,GO:0007049,GO:0008104,GO:0008150,GO:0009653,GO:0009987,GO:0010927,GO:0015630,GO:0016043,GO:0019953,GO:0022402,GO:0022413,GO:0022414,GO:0022607,GO:0030154,GO:0030435,GO:0030437,GO:0031321,GO:0031322,GO:0032502,GO:0032505,GO:0032989,GO:0033036,GO:…	ko:K09291,ko:K16280,ko:K20478
Mt0012_10321	Medtr5g040960		14.79	12.65	25.9	47.94	51.41	33.94	17.78	44.43	1.3213	4.99e-06	0.000246979	A	Belongs to the RNase T2 family	-	GO:0003674,GO:0003676,GO:0003723,GO:0003824,GO:0004518,GO:0004519,GO:0004521,GO:0004540,GO:0005488,GO:0005575,GO:0005576,GO:0005615,GO:0005618,GO:0005623,GO:0005886,GO:0006139,GO:0006725,GO:0006807,GO:0006950,GO:0007154,GO:0008150,GO:0008152,GO:0009058,GO:0009267,GO:0009605,GO:0009611,GO:0009718,GO:0009812,GO:0009813,GO:0009987,GO:0009991,GO:0016020,GO:0016036,GO:0016070,GO:0016787,GO:0016788,GO:…	ko:K01166
Mt0048_10026	Medtr2g076970		1.68	1.72	2.2	4.58	8.56	3.98	1.86667	5.70667	1.6122	5.26e-06	0.000259509	O	Mitochondrial chaperone BCS1	-	-	ko:K08900
Mt0010_10821	Medtr5g094810		3.88	3.73	3.41	8.03	15.71	7.53	3.67333	10.4233	1.5047	5.31e-06	0.000261758	Q	ABC transporter C family member	-	GO:0000166,GO:0000325,GO:0003674,GO:0003824,GO:0005215,GO:0005488,GO:0005524,GO:0005575,GO:0005576,GO:0005622,GO:0005623,GO:0005737,GO:0005773,GO:0005774,GO:0005911,GO:0006810,GO:0006855,GO:0008144,GO:0008150,GO:0008559,GO:0009506,GO:0009605,GO:0009607,GO:0010290,GO:0015238,GO:0015399,GO:0015405,GO:0015431,GO:0015893,GO:0016020,GO:0016021,GO:0016462,GO:0016787,GO:0016817,GO:0016818,GO:0016887,GO:…	ko:K05666
Mt0004_10067	Medtr1g079370		0.72	0.73	0.82	3.63	1.48	2.99	0.756667	2.7	1.8352	5.35e-06	0.000262975	S	f-box protein	-	-	-
Mt0003_10096	Medtr4g052320		1.68	1.62	3.58	6.65	9.17	5.57	2.29333	7.13	1.6365	5.48e-06	0.000268352	Q	Secoisolariciresinol dehydrogenase-like	-	-	-
Mt0014_00278	Medtr4g033205		0.41	0.33	0.16	0.89	4.87	2.19	0.3	2.65	3.143	5.56e-06	0.000272148	C	Zinc-binding dehydrogenase	-	GO:0003674,GO:0003824,GO:0005575,GO:0005622,GO:0005623,GO:0005737,GO:0005773,GO:0005886,GO:0008150,GO:0008152,GO:0009507,GO:0009526,GO:0009528,GO:0009534,GO:0009535,GO:0009536,GO:0009579,GO:0009706,GO:0009941,GO:0016020,GO:0016491,GO:0019866,GO:0031090,GO:0031967,GO:0031969,GO:0031975,GO:0031976,GO:0031984,GO:0034357,GO:0042170,GO:0042651,GO:0043226,GO:0043227,GO:0043229,GO:0043231,GO:0044422,GO:…	-
Mt0002_11513	Medtr1g043080		6	5.98	11.65	24.37	19.18	15.76	7.87667	19.77	1.3277	5.66e-06	0.00027643	K	Myb-related protein Myb4-like	-	GO:0000981,GO:0000988,GO:0000989,GO:0001067,GO:0001076,GO:0001134,GO:0001135,GO:0003674,GO:0003676,GO:0003677,GO:0003700,GO:0005488,GO:0005575,GO:0005622,GO:0005623,GO:0005634,GO:0006139,GO:0006351,GO:0006355,GO:0006357,GO:0006725,GO:0006807,GO:0006950,GO:0008150,GO:0008152,GO:0009058,GO:0009059,GO:0009266,GO:0009409,GO:0009628,GO:0009889,GO:0009891,GO:0009893,GO:0009987,GO:0010467,GO:0010468,GO:…	ko:K09422
Mt0013_10289	Medtr3g465300	CYP79B2 aux biosynthesis to check	0.1	0.17	0.03	1.42	1.57	0.46	0.1	1.15	3.5236	5.8e-06	0.000282331	Q	Belongs to the cytochrome P450 family	-	-	ko:K12153,ko:K13401
Mt0002_00074	Medtr1g008460		0.07	0.13	0.03	0.74	0.61	0.96	0.0766667	0.77	3.3282	5.8e-06	0.0002824	S	BURP domain-containing protein	-	GO:0005575,GO:0005622,GO:0005623,GO:0005737,GO:0005768,GO:0005794,GO:0005802,GO:0006950,GO:0006970,GO:0008150,GO:0009628,GO:0009651,GO:0012505,GO:0031410,GO:0031982,GO:0031984,GO:0043226,GO:0043227,GO:0043229,GO:0043231,GO:0044422,GO:0044424,GO:0044431,GO:0044444,GO:0044446,GO:0044464,GO:0050896,GO:0097708,GO:0098791	-
Mt0039_10068	Medtr1g090690		1.37	1.45	2.4	5.32	3.4	4.48	1.74	4.4	1.3384	5.86e-06	0.000284497	T	Belongs to the disease resistance NB-LRR family	-	GO:0000166,GO:0002376,GO:0003674,GO:0005488,GO:0005524,GO:0005575,GO:0005623,GO:0005886,GO:0005911,GO:0006950,GO:0006952,GO:0006955,GO:0007154,GO:0007165,GO:0008144,GO:0008150,GO:0008219,GO:0009506,GO:0009626,GO:0009987,GO:0012501,GO:0012505,GO:0016020,GO:0017076,GO:0019897,GO:0019898,GO:0023052,GO:0030054,GO:0030554,GO:0032553,GO:0032555,GO:0032559,GO:0033554,GO:0034050,GO:0035639,GO:0036094,GO:…	ko:K13457
Mt0143_10009	Medtr7g029760	NCR169-TC41305	6.48	6.05	8.01	3.11	2.5	3.78	6.84667	3.13	-1.1292	5.91e-06	0.00028609	#N/A	#N/A	#N/A	#N/A	#N/A
Mt0061_00104	Medtr4g037655		6.9	5.42	6.89	16.68	11.1	10.68	6.40333	12.82	1.0015	5.92e-06	0.000286344	#N/A	#N/A	#N/A	#N/A	#N/A
Mt0020_00366	Medtr8g078730		3.36	3.37	2.56	1.08	1.12	1.39	3.09667	1.19667	-1.3717	5.93e-06	0.000286519	S	Transmembrane family 220, helix	-	-	-
Mt0002_10160	Medtr1g010310	NCR	46.97	42.13	45.73	19.29	12.41	24.81	44.9433	18.8367	-1.2546	6.07e-06	0.000293036	#N/A	#N/A	#N/A	#N/A	#N/A
Mt0016_10395	Medtr2g097473		8.92	9.98	10.14	26	13.66	20.93	9.68	20.1967	1.061	6.23e-06	0.000298754	K	Belongs to the GRAS family	-	-	-
Mt0009_00530	Medtr8g096440		1.99	2.15	3.02	5.51	10.07	5.11	2.38667	6.89667	1.5309	6.28e-06	0.000300747	S	Indole-3-acetic acid-induced protein ARG7-like	-	-	ko:K14488
Mt0002_00946	Medtr1g029230	NCR	5.42	4.92	5.48	2	1.92	2.95	5.27333	2.29	-1.2034	6.52e-06	0.000311257	#N/A	#N/A	#N/A	#N/A	#N/A
Mt0014_10321	Medtr4g030110		0.03	0.03	0.07	0.58	0.87	0.6	0.0433333	0.683333	3.979	6.59e-06	0.000313649	S	F-box kelch-repeat protein	-	GO:0003674,GO:0003824,GO:0004842,GO:0005575,GO:0005622,GO:0005623,GO:0005634,GO:0006464,GO:0006508,GO:0006511,GO:0006807,GO:0008150,GO:0008152,GO:0009056,GO:0009057,GO:0009987,GO:0010498,GO:0016567,GO:0016740,GO:0019538,GO:0019787,GO:0019941,GO:0030163,GO:0031146,GO:0032446,GO:0036211,GO:0043161,GO:0043170,GO:0043226,GO:0043227,GO:0043229,GO:0043231,GO:0043412,GO:0043632,GO:0044237,GO:0044238,GO:…	-
Mt0028_00055	Medtr8g018110		0.07	0.26	0.2	1.66	0.67	1.29	0.176667	1.20667	2.7719	7.08e-06	0.000333915	#N/A	#N/A	#N/A	#N/A	#N/A
Mt0021_00003	Medtr0205s0040		10.33	7.73	7.58	2.34	2.53	4.28	8.54667	3.05	-1.4866	7.46e-06	0.000351008	T	receptor-like protein kinase	-	-	-
Mt0019_00045	Medtr2g079990		17.5	8.52	11.06	25.57	79.66	41.53	12.36	48.92	1.9847	7.81e-06	0.000365501	K	NAC domain-containing protein	NAC4	GO:0001101,GO:0003674,GO:0003676,GO:0003677,GO:0003700,GO:0005488,GO:0005575,GO:0005622,GO:0005623,GO:0005634,GO:0006139,GO:0006351,GO:0006355,GO:0006725,GO:0006807,GO:0006950,GO:0007154,GO:0007165,GO:0008150,GO:0008152,GO:0009058,GO:0009059,GO:0009414,GO:0009415,GO:0009628,GO:0009719,GO:0009725,GO:0009753,GO:0009755,GO:0009867,GO:0009889,GO:0009987,GO:0010033,GO:0010035,GO:0010467,GO:0010468,GO:…	-
Mt0021_00185	Medtr7g007940	NCR	60.83	61.42	51.83	23.08	19.91	34.4	58.0267	25.7967	-1.1695	8.3e-06	0.000386603	#N/A	#N/A	#N/A	#N/A	#N/A
Mt0021_00233	Medtr7g009040	NCR020-TC30870	22.16	16.65	23.83	6	8.31	10.78	20.88	8.36333	-1.32	8.69e-06	0.000404096	#N/A	#N/A	#N/A	#N/A	#N/A
Mt0018_10545	Medtr4g052650	NCR	13.14	10.11	13.69	3.88	1.73	5.24	12.3133	3.61667	-1.7675	8.83e-06	0.000409935	#N/A	#N/A	#N/A	#N/A	#N/A
Mt0037_00230	Medtr8g040640		0.55	0.43	0.56	1.26	3.17	1.99	0.513333	2.14	2.0596	9.07e-06	0.000419123	-	-	-	-	-
Mt0021_10226	Medtr7g009580		1.1	0.86	1.05	2.18	3.11	2.36	1.00333	2.55	1.3457	9.08e-06	0.000419123	T	Leucine rich repeat	-	-	-
Mt0072_10050	Medtr2g061290		0.24	0.17	0.1	1.11	0.67	1.19	0.17	0.99	2.5419	9.1e-06	0.000419629	S	PRLI-interacting factor	-	-	-
Mt0093_10035	Medtr6g038200		0.96	0.63	1.51	4.89	2.76	2.79	1.03333	3.48	1.7518	9.53e-06	0.000434954	CG	UDP-glycosyltransferase	-	GO:0000302,GO:0001101,GO:0003674,GO:0003824,GO:0005575,GO:0005622,GO:0005623,GO:0005737,GO:0005829,GO:0006082,GO:0006520,GO:0006725,GO:0006807,GO:0006950,GO:0006970,GO:0006972,GO:0006979,GO:0007154,GO:0007275,GO:0008150,GO:0008152,GO:0008194,GO:0009072,GO:0009414,GO:0009415,GO:0009605,GO:0009628,GO:0009636,GO:0009651,GO:0009653,GO:0009696,GO:0009719,GO:0009725,GO:0009737,GO:0009850,GO:0009987,GO:…	ko:K13691,ko:K21374
Mt0016_00070	Medtr2g104340		0.1	0.23	0.16	1.32	0.58	1.36	0.163333	1.08667	2.734	9.9e-06	0.000450673	M	aspartic-type endopeptidase activity	-	-	-
Mt0045_00108	Medtr4g015740	NCR	34.79	26.43	34.43	14.95	13.4	19.14	31.8833	15.83	-1.0101	9.92e-06	0.000450818	#N/A	#N/A	#N/A	#N/A	#N/A
Mt0006_10386	Medtr3g082260		0.31	0.26	0.1	4.65	0.55	2.26	0.223333	2.48667	3.4769	1.04e-05	0.000469514	L	transposition, RNA-mediated	-	-	-
Mt0024_10153	Medtr6g086060		23.4	21.54	21.44	9.66	5.32	11.48	22.1267	8.82	-1.3269	1.04e-05	0.000472443	S	Serine incorporator	-	GO:0003333,GO:0003674,GO:0005215,GO:0005342,GO:0005575,GO:0005622,GO:0005623,GO:0005737,GO:0005783,GO:0005789,GO:0006629,GO:0006644,GO:0006793,GO:0006796,GO:0006810,GO:0006811,GO:0006812,GO:0006820,GO:0006865,GO:0008150,GO:0008152,GO:0008324,GO:0008509,GO:0008514,GO:0008610,GO:0008654,GO:0009058,GO:0009987,GO:0012505,GO:0015075,GO:0015171,GO:0015175,GO:0015179,GO:0015194,GO:0015318,GO:0015711,GO:…	-
Mt0014_00651	Medtr4g023040		0.58	0.96	1.28	2.95	2.24	2.42	0.94	2.53667	1.4322	1.11e-05	0.000497007	S	TMV resistance protein N-like	-	-	ko:K19613,ko:K22038
Mt0103_00031	Medtr4g044110	CKX	4.91	3.07	1.9	8.8	9.72	10.48	3.29333	9.66667	1.5535	1.14e-05	0.00050956	C	Cytokinin dehydrogenase	CKX9	GO:0000166,GO:0003674,GO:0003824,GO:0005488,GO:0005575,GO:0005576,GO:0005615,GO:0005622,GO:0005623,GO:0005737,GO:0005773,GO:0006725,GO:0006807,GO:0007275,GO:0008150,GO:0008152,GO:0009056,GO:0009308,GO:0009653,GO:0009690,GO:0009791,GO:0009823,GO:0009888,GO:0009987,GO:0010016,GO:0010103,GO:0010374,GO:0010817,GO:0016491,GO:0016614,GO:0016645,GO:0019139,GO:0032501,GO:0032502,GO:0034754,GO:0036094,GO:…	ko:K00279
Mt0002_11021	Medtr8g051830		0.03	0	0	0.68	0.42	0.86	0.01	0.653333	6.0297	1.16e-05	0.000517965	L	Retrotransposon gag protein	-	-	-
Mt0006_00330	Medtr3g082250		11.29	12.75	8.34	55.54	15.46	46.01	10.7933	39.0033	1.8535	1.17e-05	0.000519477	L	transposition, RNA-mediated	-	-	-
Mt0091_10028	Medtr3g061430		9.26	8.39	6.73	25.32	12.8	17.78	8.12667	18.6333	1.1972	1.18e-05	0.00052328	T	LRR receptor-like serine threonine-protein kinase	-	GO:0000003,GO:0000166,GO:0001704,GO:0001706,GO:0003006,GO:0003674,GO:0003824,GO:0004672,GO:0004674,GO:0005488,GO:0005524,GO:0005575,GO:0005618,GO:0005623,GO:0005886,GO:0006464,GO:0006468,GO:0006793,GO:0006796,GO:0006807,GO:0006810,GO:0006833,GO:0006950,GO:0007275,GO:0007369,GO:0007389,GO:0007492,GO:0008104,GO:0008144,GO:0008150,GO:0008152,GO:0009505,GO:0009531,GO:0009611,GO:0009653,GO:0009790,GO:…	-
Mt0020_10401	Medtr8g079660		0	0	0	0.62	0.35	0.3	0.001	0.423333	8.7257	1.2e-05	0.000529385	S	LOB domain-containing protein	-	-	-
Mt0036_10155	Medtr7g114130		0.17	0.43	0.33	1.42	1.09	1.13	0.31	1.21333	1.9686	1.2e-05	0.000531438	T	BONZAI 3-like	-	GO:0003674,GO:0005488,GO:0005543,GO:0005544,GO:0005575,GO:0005623,GO:0005886,GO:0006950,GO:0006952,GO:0008150,GO:0008289,GO:0009987,GO:0010118,GO:0010941,GO:0016020,GO:0043167,GO:0043168,GO:0044464,GO:0048519,GO:0048523,GO:0050789,GO:0050794,GO:0050896,GO:0060548,GO:0065007,GO:0071944,GO:0090332	-
Mt0052_10175	Medtr6g080440		2.06	1.39	8.47	41.97	16.74	18.44	3.97333	25.7167	2.6943	1.21e-05	0.00053236	O	glutathione S-transferase	-	-	ko:K00799
Mt0026_00364	Medtr7g074730		0.17	0.2	0.1	1.32	0.61	0.96	0.156667	0.963333	2.6203	1.21e-05	0.00053431	V	Encoded by	-	GO:0003674,GO:0003824,GO:0005488,GO:0008150,GO:0008152,GO:0009058,GO:0009718,GO:0009812,GO:0009813,GO:0016491,GO:0016614,GO:0016616,GO:0042440,GO:0045552,GO:0046148,GO:0046283,GO:0047890,GO:0048037,GO:0050662,GO:0055114,GO:0071704,GO:1901576	ko:K13265
Mt0021_00104	Medtr7g406940	NCR	47	40.71	63.52	21.08	25.72	27.2	50.41	24.6667	-1.0311	1.25e-05	0.00054817	#N/A	#N/A	#N/A	#N/A	#N/A
Mt0038_00180	Medtr8g069310	NCR	1.41	2.38	1.77	0.4	0.51	0.66	1.85333	0.523333	-1.8243	1.26e-05	0.000552608	#N/A	#N/A	#N/A	#N/A	#N/A
Mt0044_00074	Medtr4g013160	NCR	6.31	5.48	7.06	3.66	2.34	3.05	6.28333	3.01667	-1.0586	1.27e-05	0.000555434	#N/A	#N/A	#N/A	#N/A	#N/A
Mt0026_10298	Medtr7g073430		31.97	22.7	17	133.59	37.71	92.95	23.89	88.0833	1.8825	1.33e-05	0.00057475	K	WRKY transcription factor	-	GO:0001101,GO:0002218,GO:0002252,GO:0002253,GO:0002376,GO:0002682,GO:0002684,GO:0003674,GO:0003676,GO:0003677,GO:0003700,GO:0005488,GO:0005575,GO:0005622,GO:0005623,GO:0005634,GO:0006139,GO:0006351,GO:0006355,GO:0006725,GO:0006807,GO:0006950,GO:0006952,GO:0006955,GO:0007154,GO:0007165,GO:0008150,GO:0008152,GO:0009058,GO:0009059,GO:0009605,GO:0009607,GO:0009617,GO:0009620,GO:0009627,GO:0009682,GO:…	-
Mt0019_10420	Medtr2g089070		0.07	0.1	0.07	1.26	0.58	0.53	0.08	0.79	3.3038	1.41e-05	0.00060921	K	transcription factor	-	GO:0000976,GO:0000981,GO:0001046,GO:0001047,GO:0001067,GO:0001228,GO:0003674,GO:0003676,GO:0003677,GO:0003690,GO:0003700,GO:0005488,GO:0005515,GO:0005575,GO:0005622,GO:0005623,GO:0005634,GO:0006139,GO:0006351,GO:0006355,GO:0006357,GO:0006366,GO:0006725,GO:0006807,GO:0008150,GO:0008152,GO:0009058,GO:0009059,GO:0009889,GO:0009891,GO:0009893,GO:0009987,GO:0010467,GO:0010468,GO:0010556,GO:0010557,GO:…	-
Mt0083_10084	Medtr0172s0030		3.47	3.77	4.66	0.52	1.67	0.83	3.96667	1.00667	-1.9783	1.41e-05	0.000609249	K	RNA polymerase sigma factor	-	GO:0000988,GO:0000990,GO:0003674,GO:0003676,GO:0003677,GO:0003700,GO:0005488,GO:0005575,GO:0005622,GO:0005623,GO:0005737,GO:0006139,GO:0006351,GO:0006352,GO:0006355,GO:0006725,GO:0006807,GO:0008150,GO:0008152,GO:0009058,GO:0009059,GO:0009314,GO:0009416,GO:0009507,GO:0009536,GO:0009628,GO:0009889,GO:0009987,GO:0010109,GO:0010467,GO:0010468,GO:0010556,GO:0016070,GO:0016987,GO:0018130,GO:0019219,GO:…	ko:K03086
Mt0050_10132	Medtr1g053620		0.58	1.02	1.08	0.18	0.13	0.1	0.893333	0.136667	-2.7085	1.47e-05	0.000633073	#N/A	#N/A	#N/A	#N/A	#N/A
Mt0021_10148	Medtr7g007810	NCR	10.84	8.19	11.49	3.85	4.43	5.64	10.1733	4.64	-1.1326	1.49e-05	0.000639359	#N/A	#N/A	#N/A	#N/A	#N/A
Mt0151_00038	Medtr6g071040		2.37	1.59	2.49	5.72	12.06	4.54	2.15	7.44	1.791	1.52e-05	0.000649654	-	-	-	-	-
Mt0007_00289	Medtr3g093720		0.17	0.4	0.2	1.2	1.25	0.9	0.256667	1.11667	2.1212	1.59e-05	0.000673876	-	-	-	-	-
Mt0042_00131	Medtr6g071925		0	0.03	0.03	1.17	0.35	0.9	0.02	0.806667	5.3339	1.6e-05	0.000680598	O	Toll - interleukin 1 - resistance	-	-	-
Mt0048_10243	Medtr2g070780		4.8	4.23	5.32	2.83	1.89	2.16	4.78333	2.29333	-1.0606	1.7e-05	0.000716374	-	-	-	-	-
Mt0004_00866	Medtr1g069960		2.98	1.52	1.54	4.62	8.59	6	2.01333	6.40333	1.6692	1.72e-05	0.000723295	K	transcription factor	-	GO:0000160,GO:0003674,GO:0003676,GO:0003677,GO:0003700,GO:0005488,GO:0005575,GO:0005622,GO:0005623,GO:0005634,GO:0006139,GO:0006351,GO:0006355,GO:0006725,GO:0006807,GO:0007154,GO:0007165,GO:0008150,GO:0008152,GO:0009058,GO:0009059,GO:0009719,GO:0009723,GO:0009725,GO:0009755,GO:0009873,GO:0009889,GO:0009987,GO:0010033,GO:0010200,GO:0010243,GO:0010467,GO:0010468,GO:0010556,GO:0016070,GO:0018130,GO:…	-
Mt0003_10400	Medtr4g059890		4.94	4.2	5.91	1.88	1.35	2.59	5.01667	1.94	-1.3707	1.75e-05	0.000733173	#N/A	#N/A	#N/A	#N/A	#N/A
Mt0046_00224	Medtr1g103050		10.5	9.58	7.19	4.83	3.53	4.48	9.09	4.28	-1.0867	1.76e-05	0.000736757	O	RING-like zinc finger	-	-	-
Mt0009_00319	Medtr8g091320		1.24	0.53	0.72	0.03	0.13	0.03	0.83	0.0633333	-3.7121	1.77e-05	0.000739831	I	Inositol-3-phosphate	-	GO:0000003,GO:0000302,GO:0002252,GO:0002376,GO:0003006,GO:0003674,GO:0003824,GO:0004512,GO:0005575,GO:0005622,GO:0005623,GO:0005634,GO:0005737,GO:0005975,GO:0006020,GO:0006021,GO:0006066,GO:0006575,GO:0006629,GO:0006644,GO:0006650,GO:0006658,GO:0006659,GO:0006793,GO:0006796,GO:0006807,GO:0006950,GO:0006952,GO:0006979,GO:0007154,GO:0007275,GO:0008150,GO:0008152,GO:0008610,GO:0008654,GO:0009058,GO:…	ko:K01858
Mt0055_10072	Medtr2g039120		38.97	39.35	68.18	201.35	104.57	89.5	48.8333	131.807	1.4325	1.81e-05	0.000755118	G	beta-galactosidase activity	-	-	-
Mt0014_10418	Medtr4g027225		0.79	0.76	1.18	2.65	2.05	2.02	0.91	2.24	1.2996	1.83e-05	0.000763109	-	-	-	-	-
Mt0009_10479	Medtr8g095040		0.55	1.16	0.98	3.38	2.02	2.39	0.896667	2.59667	1.534	1.89e-05	0.000785471	P	Ammonium transporter	-	GO:0003674,GO:0005215,GO:0005575,GO:0006810,GO:0006811,GO:0006812,GO:0008150,GO:0008324,GO:0008519,GO:0015075,GO:0015696,GO:0016020,GO:0016021,GO:0022857,GO:0031224,GO:0034220,GO:0044425,GO:0051179,GO:0051234,GO:0055085,GO:0071705,GO:0072488,GO:0098655	ko:K03320
Mt0034_10101	Medtr8g468070	NCR	3.36	2.58	4.76	1.42	1.41	1.19	3.56667	1.34	-1.4123	1.89e-05	0.000786629	#N/A	#N/A	#N/A	#N/A	#N/A
Mt0020_10211	Medtr8g075980	defensin-like	0.99	0.89	1.05	0.12	0.26	0.23	0.976667	0.203333	-2.264	1.99e-05	0.000824422	T	Belongs to the DEFL family	-	GO:0001906,GO:0005575,GO:0005576,GO:0005618,GO:0005623,GO:0005886,GO:0006950,GO:0006952,GO:0008150,GO:0009505,GO:0009605,GO:0009607,GO:0009620,GO:0016020,GO:0030312,GO:0031640,GO:0035821,GO:0043207,GO:0044364,GO:0044419,GO:0044464,GO:0050832,GO:0050896,GO:0051704,GO:0051707,GO:0071944,GO:0098542	-
Mt0020_10440	Medtr3g091000		0.65	0.43	0.79	2.77	1.89	1.43	0.623333	2.03	1.7034	2e-05	0.000826485	K	heat shock factor protein	-	GO:0003674,GO:0003676,GO:0003677,GO:0003700,GO:0005488,GO:0005575,GO:0005622,GO:0005623,GO:0005634,GO:0005737,GO:0006139,GO:0006351,GO:0006355,GO:0006725,GO:0006807,GO:0006950,GO:0008150,GO:0008152,GO:0009058,GO:0009059,GO:0009266,GO:0009408,GO:0009628,GO:0009889,GO:0009890,GO:0009892,GO:0009987,GO:0010467,GO:0010468,GO:0010556,GO:0010558,GO:0010605,GO:0010629,GO:0016070,GO:0018130,GO:0019219,GO:…	ko:K09419
Mt0018_00509	Medtr2g436310		1.89	2.35	1.58	0.62	0.58	0.76	1.94	0.653333	-1.5702	2.01e-05	0.000828463	L	sugar transporter	-	GO:0000325,GO:0003674,GO:0005215,GO:0005353,GO:0005355,GO:0005575,GO:0005622,GO:0005623,GO:0005737,GO:0005773,GO:0005774,GO:0005886,GO:0005887,GO:0006810,GO:0006950,GO:0006970,GO:0006995,GO:0007034,GO:0007154,GO:0007623,GO:0008150,GO:0008515,GO:0008643,GO:0008645,GO:0009266,GO:0009267,GO:0009314,GO:0009409,GO:0009416,GO:0009605,GO:0009628,GO:0009642,GO:0009646,GO:0009705,GO:0009743,GO:0009744,GO:…	ko:K15382
Mt0058_10143	Medtr7g095860	NCR040-TC33271	68.17	55.64	67.26	21.38	22.83	37.85	63.69	27.3533	-1.2194	2.01e-05	0.000829544	#N/A	#N/A	#N/A	#N/A	#N/A
Mt0050_00128	Medtr1g053615		0.58	0.66	1.02	0.09	0.13	0.07	0.753333	0.0966667	-2.9622	2.14e-05	0.000878587	#N/A	#N/A	#N/A	#N/A	#N/A
Mt0048_10083	Medtr2g075680		1.54	1.06	1.41	5.23	2.37	3.75	1.33667	3.78333	1.501	2.18e-05	0.000891373	K	WRKY transcription factor	-	GO:0001101,GO:0002218,GO:0002252,GO:0002253,GO:0002376,GO:0002682,GO:0002684,GO:0003674,GO:0003676,GO:0003677,GO:0003700,GO:0005488,GO:0005575,GO:0005622,GO:0005623,GO:0005634,GO:0006139,GO:0006351,GO:0006355,GO:0006725,GO:0006807,GO:0006950,GO:0006952,GO:0006955,GO:0007154,GO:0007165,GO:0008150,GO:0008152,GO:0009058,GO:0009059,GO:0009605,GO:0009607,GO:0009617,GO:0009620,GO:0009627,GO:0009682,GO:…	-
Mt0026_00194	Medtr7g071220	NCR	4.25	3.96	5.48	2.62	1.89	1.79	4.56333	2.1	-1.1197	2.18e-05	0.000891373	#N/A	#N/A	#N/A	#N/A	#N/A
Mt0059_10168	Medtr7g446010	NCR	2.61	2.35	2.86	1.05	0.87	1.29	2.60667	1.07	-1.2846	2.21e-05	0.000898773	#N/A	#N/A	#N/A	#N/A	#N/A
Mt0004_11105	Medtr1g072420		106.53	94.96	85.48	137.69	246.19	228.13	95.6567	204.003	1.0927	2.23e-05	0.000903083	O	Belongs to the peptidase A1 family	-	-	-
Mt0026_00399	Medtr7g075700		0.99	1.06	0.72	0.15	0.19	0.2	0.923333	0.18	-2.3589	2.26e-05	0.000912817	A	RING-variant domain	-	GO:0003674,GO:0003676,GO:0003677,GO:0003824,GO:0005488,GO:0005575,GO:0006139,GO:0006351,GO:0006355,GO:0006464,GO:0006725,GO:0006807,GO:0008150,GO:0008152,GO:0008270,GO:0009058,GO:0009059,GO:0009889,GO:0009987,GO:0010467,GO:0010468,GO:0010556,GO:0016020,GO:0016021,GO:0016070,GO:0016567,GO:0016740,GO:0018130,GO:0019219,GO:0019222,GO:0019438,GO:0019538,GO:0031224,GO:0031323,GO:0031326,GO:0032446,GO:…	-
Mt0005_11094	Medtr5g027810		6.31	5.72	14.05	23.38	39.86	19.8	8.69333	27.68	1.6709	2.3e-05	0.000927577	T	Belongs to the disease resistance NB-LRR family	-	GO:0000166,GO:0002376,GO:0003674,GO:0005488,GO:0005524,GO:0005575,GO:0005622,GO:0005623,GO:0005737,GO:0005886,GO:0006950,GO:0006952,GO:0006955,GO:0007154,GO:0007165,GO:0008144,GO:0008150,GO:0008219,GO:0009605,GO:0009607,GO:0009626,GO:0009814,GO:0009987,GO:0012501,GO:0012505,GO:0016020,GO:0017076,GO:0019897,GO:0019898,GO:0023052,GO:0030554,GO:0032553,GO:0032555,GO:0032559,GO:0033554,GO:0034050,GO:…	ko:K13457
Mt0048_10182	Medtr2g072340		1.85	1.65	1.74	8.52	2.85	5.21	1.74667	5.52667	1.6618	2.32e-05	0.000935072	Q	Belongs to the cytochrome P450 family	-	GO:0003674,GO:0003824,GO:0004497,GO:0005488,GO:0005506,GO:0005575,GO:0005622,GO:0005623,GO:0005737,GO:0005773,GO:0005774,GO:0006807,GO:0008150,GO:0008152,GO:0009820,GO:0016020,GO:0016021,GO:0016491,GO:0016627,GO:0016634,GO:0016705,GO:0020037,GO:0031090,GO:0031224,GO:0043167,GO:0043169,GO:0043226,GO:0043227,GO:0043229,GO:0043231,GO:0044422,GO:0044424,GO:0044425,GO:0044437,GO:0044444,GO:0044446,GO:…	ko:K07426,ko:K07428,ko:K10717,ko:K17873,ko:K20660
Mt0012_10627	Medtr5g034090		19.01	23.56	27.44	14.18	6.96	9.02	23.3367	10.0533	-1.2149	2.34e-05	0.000941539	G	Polygalacturonase	-	GO:0003674,GO:0003824,GO:0004553,GO:0004650,GO:0005575,GO:0005576,GO:0005618,GO:0005623,GO:0005975,GO:0008150,GO:0008152,GO:0009664,GO:0009825,GO:0009827,GO:0009831,GO:0009987,GO:0016043,GO:0016049,GO:0016787,GO:0016798,GO:0030312,GO:0040007,GO:0042545,GO:0042547,GO:0044238,GO:0044464,GO:0045229,GO:0071554,GO:0071555,GO:0071669,GO:0071704,GO:0071840,GO:0071944	ko:K01213
Mt0018_00249	Medtr2g030220		1.27	1.12	1.64	3.66	2.44	2.95	1.34333	3.01667	1.1671	2.36e-05	0.000948308	-	-	-	-	-
Mt0044_00274	Medtr7g029540		1.58	2.87	2.13	0.65	0.48	0.86	2.19333	0.663333	-1.7253	2.37e-05	0.000950476	#N/A	#N/A	#N/A	#N/A	#N/A
Mt0004_00700	Medtr4g080783		7.44	7.37	13.06	23.91	19.08	16.26	9.29	19.75	1.0881	2.37e-05	0.000951293	O	Ubiquitin exists either covalently attached to another protein, or free (unanchored). When covalently bound, it is conjugated to target proteins via an isopeptide bond either as a monomer (monoubiquitin), a polymer linked via different Lys residues of the ubiquitin (polyubiquitin chains) or a linear polymer linked via the initiator Met of the ubiquitin (linear polyubiquitin chains). Polyubiquitin…	-	-	ko:K08770
Mt0063_10031	Medtr5g075650		6.42	6.91	9.16	45.38	12.7	18.98	7.49667	25.6867	1.7767	2.41e-05	0.000963848	#N/A	#N/A	#N/A	#N/A	#N/A
Mt0085_00058	Medtr1999s0010		7.86	6.01	7.45	3.08	1.67	3.52	7.10667	2.75667	-1.3662	2.47e-05	0.000984239	#N/A	#N/A	#N/A	#N/A	#N/A
Mt0002_10996	Medtr1g030890	MtPIN3	2.4	3.4	3.68	1.54	1.03	1.33	3.16	1.3	-1.2814	2.5e-05	0.000992923	P	May act as a component of the auxin efflux carrier	PIN4	GO:0000003,GO:0000578,GO:0000902,GO:0000904,GO:0003006,GO:0003674,GO:0005215,GO:0005575,GO:0005622,GO:0005623,GO:0005737,GO:0005783,GO:0005886,GO:0005911,GO:0006810,GO:0007154,GO:0007165,GO:0007275,GO:0007389,GO:0008150,GO:0009314,GO:0009416,GO:0009506,GO:0009605,GO:0009606,GO:0009628,GO:0009629,GO:0009630,GO:0009653,GO:0009719,GO:0009725,GO:0009733,GO:0009734,GO:0009755,GO:0009790,GO:0009791,GO:…	ko:K13947
Mt0614_00002	Medtr3g053110		1.27	1.19	1.25	0.46	0.32	0.23	1.23667	0.336667	-1.8771	2.51e-05	0.000993304	T	TMV resistance protein N-like	-	-	ko:K19613,ko:K22038
Mt0028_00110	Medtr8g019380		0.1	0.17	0.1	0.71	0.67	0.76	0.123333	0.713333	2.532	2.65e-05	0.00104493	S	Domain of unknown function	-	-	-
Mt0016_00110	Medtr2g103460		0.89	0.86	1.21	5.78	1.92	2.95	0.986667	3.55	1.8472	2.66e-05	0.00104701	S	glyoxalase I family protein	-	-	-
Mt0049_00004	Medtr3g452880		0.14	0.2	0.07	3.51	0.38	1.19	0.136667	1.69333	3.6311	2.68e-05	0.00105302	G	LRR receptor-like serine threonine-protein kinase	-	-	-
Mt0032_00063	Medtr6g043380		0.34	0.73	0.72	0	0	0.03	0.596667	0.01	-5.8989	2.73e-05	0.0010725	#N/A	#N/A	#N/A	#N/A	#N/A
Mt0058_00132	Medtr7g095640		122.41	125.72	121.46	67.97	40.57	72.42	123.197	60.32	-1.0303	2.87e-05	0.00111956	T	Belongs to the BI1 family	-	-	ko:K06890
Mt0082_10015	Medtr6g069000		0.31	0.53	0.46	1.32	1.22	1.39	0.433333	1.31	1.596	2.9e-05	0.00112977	Q	Belongs to the cytochrome P450 family	-	GO:0000166,GO:0003674,GO:0003824,GO:0004386,GO:0004497,GO:0005488,GO:0005506,GO:0005524,GO:0005575,GO:0005622,GO:0005623,GO:0005634,GO:0005681,GO:0006139,GO:0006396,GO:0006397,GO:0006725,GO:0006807,GO:0008144,GO:0008150,GO:0008152,GO:0008380,GO:0009987,GO:0010467,GO:0016020,GO:0016021,GO:0016070,GO:0016071,GO:0016462,GO:0016491,GO:0016705,GO:0016709,GO:0016787,GO:0016817,GO:0016818,GO:0017076,GO:…	-
Mt0088_10002	Medtr7g015130		21.58	24.48	21.17	89.13	29.28	68.57	22.41	62.3267	1.4757	2.91e-05	0.00113121	S	FCP1 homology domain-containing protein C1271.03c-like	-	-	-
Mt0147_10003	Medtr6g037220		2.5	2.44	2	0.92	0.99	0.93	2.31333	0.946667	-1.289	2.93e-05	0.00113736	#N/A	#N/A	#N/A	#N/A	#N/A
Mt0035_00098	Medtr7g022310		17.33	19.26	23.31	78.27	31.01	40.84	19.9667	50.04	1.3255	3.04e-05	0.00116954	E	Sphingosine-1-phosphate	-	GO:0003674,GO:0003824,GO:0005488,GO:0005575,GO:0005622,GO:0005623,GO:0005737,GO:0005783,GO:0005789,GO:0006082,GO:0006629,GO:0006643,GO:0006665,GO:0006807,GO:0008117,GO:0008144,GO:0008150,GO:0008152,GO:0009056,GO:0009987,GO:0012505,GO:0016020,GO:0016021,GO:0016042,GO:0016829,GO:0016830,GO:0016831,GO:0016832,GO:0019752,GO:0019842,GO:0030149,GO:0030170,GO:0031224,GO:0031984,GO:0036094,GO:0042175,GO:…	ko:K01634
Mt0005_10552	Medtr5g016200		5.01	5.62	4.86	2.8	1.41	2.39	5.16333	2.2	-1.2308	3.04e-05	0.00117039	K	DNA-directed RNA polymerases I, II, and III subunit	-	GO:0000418,GO:0000428,GO:0003674,GO:0003676,GO:0003677,GO:0003824,GO:0003899,GO:0005488,GO:0005575,GO:0005622,GO:0005623,GO:0005634,GO:0005654,GO:0005665,GO:0005666,GO:0005730,GO:0005736,GO:0006139,GO:0006351,GO:0006360,GO:0006366,GO:0006383,GO:0006725,GO:0006807,GO:0008150,GO:0008152,GO:0009058,GO:0009059,GO:0009987,GO:0010467,GO:0016070,GO:0016591,GO:0016740,GO:0016772,GO:0016779,GO:0018130,GO:…	ko:K03013
Mt0004_10115	Medtr1g080250		15.82	18.73	23.7	54.06	30.08	33.7	19.4167	39.28	1.0165	3.09e-05	0.00118362	E	low-specificity L-threonine aldolase 1	-	GO:0001505,GO:0003674,GO:0003824,GO:0004793,GO:0005575,GO:0005622,GO:0005623,GO:0005737,GO:0005829,GO:0006082,GO:0006520,GO:0006544,GO:0006545,GO:0006566,GO:0006567,GO:0006807,GO:0008150,GO:0008152,GO:0008652,GO:0008732,GO:0009056,GO:0009058,GO:0009063,GO:0009066,GO:0009068,GO:0009069,GO:0009070,GO:0009987,GO:0016053,GO:0016054,GO:0016829,GO:0016830,GO:0016832,GO:0017144,GO:0019752,GO:0042133,GO:…	ko:K01620
Mt0026_10224	Medtr7g071310		41	30.99	45.96	14.71	14.11	23.06	39.3167	17.2933	-1.1849	3.1e-05	0.00118542	#N/A	#N/A	#N/A	#N/A	#N/A
Mt0041_10014	Medtr8g044140		4.56	4	4.43	2.06	1.57	2.45	4.33	2.02667	-1.0953	3.21e-05	0.00122778	CG	Belongs to the UDP-glycosyltransferase family	-	-	-
Mt0064_10083	Medtr4g009590		7.48	7.37	5.91	10.25	20.04	19.8	6.92	16.6967	1.2707	3.22e-05	0.00122936	S	UPF0481 protein	-	-	-
Mt0002_00540	Medtr1g019440		1.68	2.25	4.73	72.21	9.59	23.12	2.88667	34.9733	3.5988	3.24e-05	0.00123608	G	Belongs to the glycosyl hydrolase 13 family	-	GO:0001101,GO:0003674,GO:0003824,GO:0004553,GO:0004556,GO:0005488,GO:0005509,GO:0005575,GO:0005576,GO:0005975,GO:0008150,GO:0008152,GO:0009719,GO:0009725,GO:0009737,GO:0009739,GO:0010033,GO:0016160,GO:0016787,GO:0016798,GO:0033993,GO:0042221,GO:0043167,GO:0043169,GO:0044238,GO:0046872,GO:0048046,GO:0050896,GO:0071704,GO:0097305,GO:0103025,GO:1901700	ko:K01176
Mt0001_10283	Medtr4g129860		0.62	0.93	0.98	1.94	2.18	1.92	0.843333	2.01333	1.2554	3.29e-05	0.00125083	S	HD domain-containing protein	-	-	ko:K07023
Mt0021_10093	Medtr7g406910		2.13	2.58	3.71	1.14	0.83	1.16	2.80667	1.04333	-1.4277	3.34e-05	0.0012707	S	Domain of unknown function (DUF4283)	-	-	-
Mt0039_10097	Medtr1g090150		3.12	1.92	4.96	8.22	10.45	7.76	3.33333	8.81	1.4022	3.41e-05	0.00129312	O	Belongs to the GST superfamily	-	-	ko:K00799
Mt0001_10430	Medtr4g126150	CKX	0.14	0.2	0.1	1.45	0.51	0.9	0.146667	0.953333	2.7004	3.43e-05	0.00129784	C	Cytokinin dehydrogenase	CKX3	GO:0000166,GO:0003674,GO:0003824,GO:0005488,GO:0005575,GO:0005576,GO:0005615,GO:0005622,GO:0005623,GO:0005737,GO:0005773,GO:0005783,GO:0006725,GO:0006807,GO:0008131,GO:0008150,GO:0008152,GO:0009056,GO:0009308,GO:0009690,GO:0009823,GO:0009987,GO:0010817,GO:0012505,GO:0016491,GO:0016614,GO:0016638,GO:0016641,GO:0016645,GO:0019139,GO:0034754,GO:0036094,GO:0042445,GO:0042447,GO:0043167,GO:0043168,GO:…	ko:K00279
Mt0008_00952	Medtr7g046115	NCR	25.83	21.61	21.44	8.65	8.37	13.97	22.96	10.33	-1.1523	3.47e-05	0.00131279	#N/A	#N/A	#N/A	#N/A	#N/A
Mt0003_00123	Medtr4g053180	NCR	3.26	2.81	4.3	1.66	1.15	1.56	3.45667	1.45667	-1.2467	3.56e-05	0.00134431	#N/A	#N/A	#N/A	#N/A	#N/A
Mt0004_10620	Medtr1g062590		0.27	0.26	0.33	1.66	0.71	1.29	0.286667	1.22	2.0894	3.73e-05	0.00140295	T	Thaumatin-like protein	-	GO:0005575,GO:0005576,GO:0006950,GO:0006952,GO:0008150,GO:0050896	-
Mt0019_10071	Medtr2g081300		0	0.07	0.1	1.45	0.32	0.83	0.0566667	0.866667	3.9349	3.81e-05	0.00142842	DZ	EF-hand domain pair	-	-	ko:K16465
Mt0051_00061	Medtr3g449540		4.15	5.55	3.78	19.38	7.98	9.42	4.49333	12.26	1.4481	3.82e-05	0.00143105	T	LRR receptor-like serine threonine-protein kinase	-	-	ko:K04733,ko:K13420
Mt0001_11759	Medtr4g094492		41.48	35.75	41.79	126.61	57.11	76	39.6733	86.5733	1.1258	3.84e-05	0.00143625	C	Belongs to the oxygen-dependent FAD-linked oxidoreductase family	-	-	ko:K22395
Mt0129_10013	Medtr1g077210		2.64	2.94	4.23	13.45	6.7	6.04	3.27	8.73	1.4167	3.86e-05	0.00144212	S	Protein of unknown function, DUF599	-	-	-
Mt0076_00016	Medtr8g097220		3.12	3.2	3.22	1.57	1.7	1.46	3.18	1.57667	-1.0121	3.89e-05	0.00145044	J	Amidase	-	GO:0003674,GO:0003824,GO:0004040,GO:0016787,GO:0016810,GO:0016811	ko:K01426
Mt0021_00196	Medtr7g008130	NCR	12.66	14.11	16.61	4.22	3.98	8.23	14.46	5.47667	-1.4007	3.92e-05	0.00145945	#N/A	#N/A	#N/A	#N/A	#N/A
Mt0001_00960	Medtr4g114080		0.07	0	0.26	0.71	1.41	1.26	0.11	1.12667	3.3565	3.98e-05	0.00147934	S	Glyoxalase/Bleomycin resistance protein/Dioxygenase superfamily	-	-	-
Mt0014_00203	Medtr4g435298	NCR	0.62	0.33	0.76	0	0.03	0	0.57	0.01	-5.8329	3.99e-05	0.00148185	#N/A	#N/A	#N/A	#N/A	#N/A
Mt0015_00241	Medtr6g022530		0.45	0.69	0.39	3.85	1.38	1.49	0.51	2.24	2.1349	4e-05	0.00148516	#N/A	#N/A	#N/A	#N/A	#N/A
Mt0024_10009	Medtr6g081390		20.89	17.54	18.48	6.83	4.23	10.38	18.97	7.14667	-1.4084	4.1e-05	0.00152046	V	Belongs to the multi antimicrobial extrusion (MATE) (TC 2.A.66.1) family	-	GO:0003674,GO:0005215,GO:0005575,GO:0005622,GO:0005623,GO:0005737,GO:0005773,GO:0005774,GO:0006810,GO:0006855,GO:0008150,GO:0009605,GO:0009607,GO:0009624,GO:0015238,GO:0015291,GO:0015297,GO:0015893,GO:0016020,GO:0016021,GO:0022804,GO:0022857,GO:0031090,GO:0031224,GO:0042221,GO:0042493,GO:0043207,GO:0043226,GO:0043227,GO:0043229,GO:0043231,GO:0044422,GO:0044424,GO:0044425,GO:0044437,GO:0044444,GO:…	ko:K03327
Mt0005_00318	Medtr5g011430		3.05	2.81	2.59	4.98	7.54	5.01	2.81667	5.84333	1.0528	4.23e-05	0.00156152	#N/A	#N/A	#N/A	#N/A	#N/A
Mt0013_10133	Medtr3g467420		2.85	3.63	11.39	22.4	49.58	15.39	5.95667	29.1233	2.2896	4.35e-05	0.00160223	O	Glutathione S-transferase	-	GO:0003674,GO:0003824,GO:0004364,GO:0007154,GO:0007165,GO:0008150,GO:0009719,GO:0009725,GO:0009733,GO:0009734,GO:0009755,GO:0009987,GO:0010033,GO:0016740,GO:0016765,GO:0023052,GO:0032870,GO:0042221,GO:0050789,GO:0050794,GO:0050896,GO:0051716,GO:0065007,GO:0070887,GO:0071310,GO:0071365,GO:0071495	ko:K00799
Mt0013_00634	Medtr3g057800	CP450	0.86	1.02	1.25	4.37	1.83	2.92	1.04333	3.04	1.5429	4.4e-05	0.00161335	Q	Cytochrome p450	-	GO:0003674,GO:0003824,GO:0004497,GO:0005488,GO:0005506,GO:0005575,GO:0008150,GO:0008152,GO:0009058,GO:0016020,GO:0016491,GO:0016705,GO:0016709,GO:0019748,GO:0020037,GO:0043167,GO:0043169,GO:0044550,GO:0046872,GO:0046906,GO:0046914,GO:0048037,GO:0055114,GO:0097159,GO:1901363	ko:K00512,ko:K07408,ko:K07418
Mt0008_10137	Medtr5g055020		3.57	3.54	2.72	12	4.81	9.02	3.27667	8.61	1.3938	4.5e-05	0.00164898	P	Heavy metal-associated isoprenylated plant protein	-	-	-
Mt0006_10802	Medtr3g071880		4.94	3.67	3.64	1.54	0.74	1.82	4.08333	1.36667	-1.5791	4.61e-05	0.00168593	P	cation H( ) antiporter 15-like	-	GO:0003674,GO:0005215,GO:0005575,GO:0005623,GO:0006810,GO:0006811,GO:0006812,GO:0006813,GO:0006885,GO:0008150,GO:0008324,GO:0012505,GO:0015075,GO:0015077,GO:0015078,GO:0015291,GO:0015297,GO:0015298,GO:0015299,GO:0015318,GO:0015672,GO:0016020,GO:0016021,GO:0022804,GO:0022857,GO:0022890,GO:0030001,GO:0031224,GO:0034220,GO:0042592,GO:0044425,GO:0044464,GO:0048878,GO:0050801,GO:0051179,GO:0051234,GO:…	-
Mt0029_10309	Medtr1g115455		1.68	1.65	1.74	0.22	0.48	0.66	1.69	0.453333	-1.8984	4.7e-05	0.00171376	L	Protein of unknown function (DUF674)	-	-	-
Mt0038_00224	Medtr8g069775		37.36	43.15	33.35	13.51	7.57	20.17	37.9533	13.75	-1.4648	4.85e-05	0.00176699	P	high affinity nitrate transporter	NRT2.3	GO:0000325,GO:0001101,GO:0003674,GO:0005215,GO:0005575,GO:0005622,GO:0005623,GO:0005737,GO:0005773,GO:0005774,GO:0005886,GO:0006082,GO:0006807,GO:0006810,GO:0006811,GO:0006820,GO:0008150,GO:0008152,GO:0008509,GO:0009705,GO:0009987,GO:0010035,GO:0010167,GO:0015075,GO:0015103,GO:0015112,GO:0015318,GO:0015698,GO:0015706,GO:0016020,GO:0016021,GO:0022857,GO:0031090,GO:0031224,GO:0034220,GO:0042126,GO:…	ko:K02575
Mt0013_00117	Medtr3g467350		0.31	0.46	0.26	4.62	0.58	2.39	0.343333	2.53	2.8815	4.9e-05	0.00178273	S	Senescence-associated carboxylesterase 101-like	-	-	-
Mt0003_00621	Medtr1579s0020		8.95	7.86	23.44	61.57	42.68	28.99	13.4167	44.4133	1.727	4.96e-05	0.00179934	Q	Tropinone reductase homolog At1g07440-like	-	GO:0003674,GO:0003824,GO:0008150,GO:0008152,GO:0016491,GO:0055114	ko:K08081
Mt0080_10038	Medtr0007s0480		0.86	0.96	1.51	0.22	0.1	0.33	1.11	0.216667	-2.357	4.97e-05	0.00179934	V	Carboxylesterase	-	GO:0003674,GO:0003824,GO:0008150,GO:0008152,GO:0016787,GO:0016788,GO:0052689	-
Mt0003_01399	Medtr4g082970		0.21	0.23	0.49	1.38	2.44	0.86	0.31	1.56	2.3312	5e-05	0.00180677	S	2-alkenal reductase (NADP( )-dependent)-like	-	-	-
Mt0009_10206	Medtr8g089110		2.61	2.08	2.92	15.38	3.66	8.79	2.53667	9.27667	1.8707	5e-05	0.00180677	S	Basic blue	-	GO:0000003,GO:0003006,GO:0003674,GO:0003824,GO:0005488,GO:0005575,GO:0005576,GO:0005623,GO:0005886,GO:0006091,GO:0007275,GO:0008150,GO:0008152,GO:0009055,GO:0009791,GO:0009856,GO:0009908,GO:0009987,GO:0016020,GO:0016491,GO:0022414,GO:0022900,GO:0031012,GO:0031224,GO:0031225,GO:0031226,GO:0032501,GO:0032502,GO:0043167,GO:0043169,GO:0044237,GO:0044421,GO:0044425,GO:0044459,GO:0044464,GO:0044706,GO:…	-
Mt0052_10095	Medtr6g078490		15.34	10.51	5.12	34.03	23.02	37.32	10.3233	31.4567	1.6075	5.11e-05	0.00184081	T	TMV resistance protein N-like	-	-	ko:K19613,ko:K22038
Mt0007_00021	Medtr6g033280		1.99	1.19	1.48	4.58	4.84	2.65	1.55333	4.02333	1.373	5.38e-05	0.00192861	C	Belongs to the mitochondrial carrier (TC 2.A.29) family	-	-	ko:K15102
Mt0010_00697	Medtr5g090970		0.34	0.33	0.43	3.29	0.87	1.36	0.366667	1.84	2.3272	5.57e-05	0.00198794	K	Transcription factor JUNGBRUNNEN 1-like	-	GO:0003674,GO:0003676,GO:0003677,GO:0003700,GO:0005488,GO:0005575,GO:0005622,GO:0005623,GO:0005634,GO:0005975,GO:0005984,GO:0005991,GO:0005992,GO:0006082,GO:0006139,GO:0006351,GO:0006355,GO:0006520,GO:0006560,GO:0006561,GO:0006725,GO:0006790,GO:0006807,GO:0006950,GO:0006970,GO:0006972,GO:0007275,GO:0007568,GO:0008150,GO:0008152,GO:0008652,GO:0009058,GO:0009059,GO:0009064,GO:0009084,GO:0009311,GO:…	-
Mt0020_00405	Medtr8g079380		3.29	4.63	6.66	9.17	10.45	9.89	4.86	9.83667	1.0172	5.69e-05	0.00202699	S	disease resistance	-	GO:0000166,GO:0003674,GO:0005488,GO:0005524,GO:0006950,GO:0006952,GO:0008144,GO:0008150,GO:0017076,GO:0030554,GO:0032553,GO:0032555,GO:0032559,GO:0035639,GO:0036094,GO:0043167,GO:0043168,GO:0043531,GO:0050896,GO:0097159,GO:0097367,GO:1901265,GO:1901363	ko:K19613
Mt0064_10093	Medtr4g009850		0.03	0.43	0.13	1.17	2.02	1.09	0.196667	1.42667	2.8588	5.95e-05	0.00210738	S	F-box protein	-	-	-
Mt0001_01708	Medtr4g095050		0.1	0.1	0.85	3.63	2.31	2.09	0.35	2.67667	2.935	6e-05	0.00211453	Q	Belongs to the cytochrome P450 family	-	GO:0001666,GO:0002213,GO:0002376,GO:0003674,GO:0003824,GO:0004497,GO:0005488,GO:0005506,GO:0005575,GO:0005622,GO:0005623,GO:0005737,GO:0005783,GO:0006082,GO:0006725,GO:0006790,GO:0006807,GO:0006950,GO:0006952,GO:0006955,GO:0008150,GO:0008152,GO:0009058,GO:0009605,GO:0009607,GO:0009617,GO:0009620,GO:0009628,GO:0009682,GO:0009759,GO:0009987,GO:0012505,GO:0016020,GO:0016021,GO:0016043,GO:0016143,GO:…	ko:K00512,ko:K00517,ko:K07418,ko:K13260,ko:K20623
Mt0014_20003	Medtr4g046087		3.57	2.64	4.1	1.45	1.54	1.59	3.43667	1.52667	-1.1706	6.05e-05	0.00212699	#N/A	#N/A	#N/A	#N/A	#N/A
Mt0086_10130	Medtr0027s0230		0.45	0.63	0.62	0.06	0.06	0	0.566667	0.04	-3.8244	6.18e-05	0.00216747	O	Belongs to the small heat shock protein (HSP20) family	-	-	ko:K13993
Mt0008_10747	Medtr5g070440		0.89	0.56	1.15	0.15	0.06	0.2	0.866667	0.136667	-2.6648	6.4e-05	0.0022344	K	B3 domain-containing protein	-	GO:0003674,GO:0003676,GO:0003677,GO:0005488,GO:0005575,GO:0005622,GO:0005623,GO:0005634,GO:0006139,GO:0006351,GO:0006355,GO:0006725,GO:0006807,GO:0008150,GO:0008152,GO:0009058,GO:0009059,GO:0009889,GO:0009987,GO:0010467,GO:0010468,GO:0010556,GO:0016070,GO:0018130,GO:0019219,GO:0019222,GO:0019438,GO:0031323,GO:0031326,GO:0032774,GO:0034641,GO:0034645,GO:0034654,GO:0043170,GO:0043226,GO:0043227,GO:…	-
Mt0019_00018	Medtr2g079470	NCR072-TC29634	36.67	41.04	43.72	17.14	11.67	24.68	40.4767	17.83	-1.1828	6.57e-05	0.00228698	#N/A	#N/A	#N/A	#N/A	#N/A
Mt0002_00452	Medtr1g017500		0.41	0.73	1.02	8.15	1.22	3.38	0.72	4.25	2.5614	6.75e-05	0.00233915	-	-	-	-	-
Mt0055_10085	Medtr2g038625		0.31	0.46	0.56	1.26	1.22	1.36	0.443333	1.28	1.5297	6.8e-05	0.00235	K	sequence-specific DNA binding	-	GO:0003674,GO:0003676,GO:0003677,GO:0003700,GO:0005488,GO:0005575,GO:0005622,GO:0005623,GO:0005634,GO:0006139,GO:0006351,GO:0006355,GO:0006725,GO:0006807,GO:0008150,GO:0008152,GO:0009058,GO:0009059,GO:0009889,GO:0009987,GO:0010467,GO:0010468,GO:0010556,GO:0016070,GO:0018130,GO:0019219,GO:0019222,GO:0019438,GO:0031323,GO:0031326,GO:0032774,GO:0034641,GO:0034645,GO:0034654,GO:0043170,GO:0043226,GO:…	ko:K09338
Mt0032_00069	Medtr6g043450		24.6	23.43	28.49	11.91	8.4	15.89	25.5067	12.0667	-1.0798	6.94e-05	0.00239696	S	function	-	-	-
Mt0424_10001	Medtr1252s0010		6.72	7.9	10.73	4.92	3.21	4.11	8.45	4.08	-1.0504	6.99e-05	0.00240999	S	Protein of unknown function (DUF971)	-	-	ko:K09422
Mt0004_10155	Medtr1g080990		23.4	15.07	11.23	105.84	24.4	59.02	16.5667	63.0867	1.9291	7.23e-05	0.00248168	-	-	-	-	-
Mt0038_00162	Medtr8g068990		1.37	1.32	0.98	3.69	2.18	2.72	1.22333	2.86333	1.2269	7.25e-05	0.00248675	V	ankyrin repeat protein	-	-	-
Mt0008_10348	Medtr5g061220		0.58	0.69	1.02	0.09	0.19	0.07	0.763333	0.116667	-2.7099	7.45e-05	0.00254197	K	Auxin response factors (ARFs) are transcriptional factors that bind specifically to the DNA sequence 5'-TGTCTC-3' found in the auxin-responsive promoter elements (AuxREs)	ARF17	GO:0000976,GO:0000987,GO:0001067,GO:0003674,GO:0003676,GO:0003677,GO:0003690,GO:0003700,GO:0005488,GO:0005575,GO:0005622,GO:0005623,GO:0005634,GO:0005737,GO:0005739,GO:0006139,GO:0006351,GO:0006355,GO:0006725,GO:0006807,GO:0007154,GO:0007165,GO:0007275,GO:0008150,GO:0008152,GO:0009058,GO:0009059,GO:0009555,GO:0009653,GO:0009719,GO:0009725,GO:0009733,GO:0009734,GO:0009755,GO:0009889,GO:0009987,GO:…	-
Mt0036_00186	Medtr7g114920		0	0	0.03	0.77	0.29	0.46	0.01	0.506667	5.663	7.59e-05	0.00258248	S	zinc finger A20 and AN1 domain-containing stress-associated protein	-	GO:0003674,GO:0003676,GO:0003677,GO:0005488,GO:0005575,GO:0005622,GO:0005623,GO:0005634,GO:0005737,GO:0006950,GO:0006970,GO:0008150,GO:0008270,GO:0009266,GO:0009408,GO:0009409,GO:0009628,GO:0009651,GO:0009987,GO:0010035,GO:0010038,GO:0010042,GO:0010043,GO:0010045,GO:0033554,GO:0034605,GO:0042221,GO:0043167,GO:0043169,GO:0043226,GO:0043227,GO:0043229,GO:0043231,GO:0044424,GO:0044464,GO:0046872,GO:…	-
Mt0064_00152	Medtr4g008780		3.57	3.47	5.48	7.42	15.1	8.66	4.17333	10.3933	1.3164	8.01e-05	0.00271154	A	U5 small nuclear ribonucleoprotein 200 kDa	SNRNP200	GO:0000166,GO:0000245,GO:0000354,GO:0000375,GO:0000377,GO:0000398,GO:0003674,GO:0003676,GO:0003723,GO:0003724,GO:0003824,GO:0004004,GO:0004386,GO:0005488,GO:0005515,GO:0005524,GO:0005575,GO:0005622,GO:0005623,GO:0005634,GO:0005654,GO:0005681,GO:0005682,GO:0005911,GO:0006139,GO:0006396,GO:0006397,GO:0006725,GO:0006807,GO:0008026,GO:0008144,GO:0008150,GO:0008152,GO:0008186,GO:0008380,GO:0009506,GO:…	ko:K12854
Mt0061_00168	Medtr4g040330		1.75	1.16	1.28	4.12	2.34	3.62	1.39667	3.36	1.2665	8.02e-05	0.00271247	T	serine threonine-protein kinase	-	GO:0000166,GO:0003002,GO:0003674,GO:0003824,GO:0004672,GO:0004674,GO:0004675,GO:0004888,GO:0005488,GO:0005524,GO:0005575,GO:0005622,GO:0005623,GO:0005737,GO:0005768,GO:0005886,GO:0006464,GO:0006468,GO:0006793,GO:0006796,GO:0006807,GO:0006810,GO:0006897,GO:0006898,GO:0006950,GO:0006952,GO:0007154,GO:0007165,GO:0007166,GO:0007167,GO:0007178,GO:0007275,GO:0007389,GO:0008144,GO:0008150,GO:0008152,GO:…	-
Mt0003_00315	Medtr4g057755		0.03	0	0	0.28	0.64	0.56	0.01	0.493333	5.6245	8.15e-05	0.00275071	I	4-coumarate--CoA ligase-like	-	GO:0000166,GO:0003674,GO:0003824,GO:0004321,GO:0005488,GO:0005524,GO:0005575,GO:0005622,GO:0005623,GO:0005737,GO:0005777,GO:0006082,GO:0006629,GO:0006631,GO:0006633,GO:0008144,GO:0008150,GO:0008152,GO:0008610,GO:0009058,GO:0009694,GO:0009695,GO:0009987,GO:0010817,GO:0016053,GO:0016408,GO:0016740,GO:0016746,GO:0016747,GO:0016874,GO:0017076,GO:0019752,GO:0030554,GO:0031407,GO:0031408,GO:0032553,GO:…	ko:K01904
Mt0003_11479	Medtr4g084480		3.64	1.88	1.21	4.58	16.35	8.86	2.24333	9.93	2.1461	8.22e-05	0.00276818	G	Belongs to the glycosyl hydrolase 17 family	-	GO:0001871,GO:0003674,GO:0003824,GO:0004553,GO:0005488,GO:0005575,GO:0005576,GO:0005618,GO:0005623,GO:0005886,GO:0005975,GO:0006950,GO:0006952,GO:0007154,GO:0008150,GO:0008152,GO:0008422,GO:0009505,GO:0009987,GO:0015926,GO:0016020,GO:0016043,GO:0016787,GO:0016798,GO:0030246,GO:0030247,GO:0030312,GO:0031224,GO:0031225,GO:0031226,GO:0042973,GO:0044238,GO:0044425,GO:0044459,GO:0044464,GO:0045229,GO:…	-
Mt0006_10990	Medtr3g067780		4.25	1.65	8.73	17.85	27.9	14	4.87667	19.9167	2.03	8.31e-05	0.00279121	KLT	protein serine/threonine kinase activity	-	-	-
Mt0037_00209	Medtr8g040080		0.51	0.66	1.35	3.11	2.76	1.86	0.84	2.57667	1.617	8.31e-05	0.00279121	S	Sigma factor binding protein	-	GO:0002376,GO:0005575,GO:0005622,GO:0005623,GO:0005634,GO:0005737,GO:0006355,GO:0006950,GO:0006952,GO:0006955,GO:0008150,GO:0009314,GO:0009416,GO:0009507,GO:0009536,GO:0009605,GO:0009607,GO:0009617,GO:0009628,GO:0009814,GO:0009816,GO:0009889,GO:0009987,GO:0010468,GO:0010556,GO:0019219,GO:0019222,GO:0031323,GO:0031326,GO:0042742,GO:0043207,GO:0043226,GO:0043227,GO:0043229,GO:0043231,GO:0044093,GO:…	-
Mt0066_10100	Medtr2g068975		5.25	4.1	5.55	14.95	7.95	8.69	4.96667	10.53	1.0842	8.32e-05	0.00279224	K	WRKY transcription factor	-	GO:0001101,GO:0002218,GO:0002252,GO:0002253,GO:0002376,GO:0002682,GO:0002684,GO:0003674,GO:0003676,GO:0003677,GO:0003700,GO:0005488,GO:0005575,GO:0005622,GO:0005623,GO:0005634,GO:0006139,GO:0006351,GO:0006355,GO:0006725,GO:0006807,GO:0006950,GO:0006952,GO:0006955,GO:0007154,GO:0007165,GO:0008150,GO:0008152,GO:0009058,GO:0009059,GO:0009605,GO:0009607,GO:0009617,GO:0009620,GO:0009627,GO:0009682,GO:…	-
Mt0012_10536	Medtr5g036080		6.28	8.39	9.62	21.69	11.48	15.69	8.09667	16.2867	1.0083	8.34e-05	0.00279636	O	Belongs to the peptidase M10A family	-	-	-
Mt0022_00461	Medtr7g051340	NCR	11.49	9.71	18.02	5.6	4.84	6.87	13.0733	5.77	-1.18	8.37e-05	0.00280394	S	poly(A)-specific ribonuclease activity	-	GO:0000373,GO:0000375,GO:0000377,GO:0003674,GO:0003676,GO:0003723,GO:0005488,GO:0005575,GO:0005622,GO:0005623,GO:0005737,GO:0006139,GO:0006396,GO:0006397,GO:0006417,GO:0006725,GO:0006807,GO:0008150,GO:0008152,GO:0008380,GO:0009507,GO:0009532,GO:0009536,GO:0009570,GO:0009889,GO:0009987,GO:0010467,GO:0010468,GO:0010556,GO:0010608,GO:0016070,GO:0016071,GO:0019222,GO:0031323,GO:0031326,GO:0032268,GO:…	-
Mt0013_10764	Medtr3g053590	NCR	2.33	3.5	3.18	0.58	0.71	1.46	3.00333	0.916667	-1.7121	8.67e-05	0.00289239	#N/A	#N/A	#N/A	#N/A	#N/A
Mt0079_10003	Medtr2g019370		4.63	3.04	5.48	9.94	20.27	8.06	4.38333	12.7567	1.5412	8.78e-05	0.00292288	Q	Belongs to the iron ascorbate-dependent oxidoreductase family	GA2ox3	GO:0003674,GO:0003824,GO:0005488,GO:0006082,GO:0006629,GO:0006720,GO:0006721,GO:0008150,GO:0008152,GO:0008299,GO:0008300,GO:0008610,GO:0009056,GO:0009058,GO:0009314,GO:0009416,GO:0009628,GO:0009639,GO:0009685,GO:0009686,GO:0009987,GO:0010114,GO:0010817,GO:0016042,GO:0016053,GO:0016054,GO:0016101,GO:0016102,GO:0016103,GO:0016114,GO:0016115,GO:0016491,GO:0016705,GO:0016706,GO:0019752,GO:0042445,GO:…	ko:K04125
Mt0001_11791	Medtr4g094362		1.65	2.15	1.97	0.98	0.58	0.63	1.92333	0.73	-1.3976	8.85e-05	0.00293581	S	WAT1-related protein	-	GO:0003674,GO:0005215,GO:0005575,GO:0005622,GO:0005623,GO:0005737,GO:0005886,GO:0005887,GO:0005938,GO:0006810,GO:0007154,GO:0007165,GO:0008150,GO:0009719,GO:0009725,GO:0009733,GO:0009734,GO:0009755,GO:0009987,GO:0010033,GO:0016020,GO:0016021,GO:0022857,GO:0023052,GO:0031224,GO:0031226,GO:0032870,GO:0042221,GO:0044424,GO:0044425,GO:0044444,GO:0044459,GO:0044464,GO:0050789,GO:0050794,GO:0050896,GO:…	-
Mt0011_10461	Medtr7g085200	Apyrase Q84UD9	2.85	3.34	3.02	6.25	4.55	8.53	3.07	6.44333	1.0696	9.21e-05	0.00304117	F	Belongs to the GDA1 CD39 NTPase family	-	GO:0003674,GO:0003824,GO:0005575,GO:0005622,GO:0005623,GO:0005634,GO:0006403,GO:0006810,GO:0008150,GO:0015931,GO:0016462,GO:0016787,GO:0016817,GO:0016818,GO:0017111,GO:0033036,GO:0043226,GO:0043227,GO:0043229,GO:0043231,GO:0044424,GO:0044464,GO:0050657,GO:0050658,GO:0051028,GO:0051179,GO:0051234,GO:0051236,GO:0071702,GO:0071705	ko:K14641
Mt0041_00173	Medtr6g061240		6.45	6.57	7.29	3.35	1.54	3.42	6.77	2.77	-1.2893	9.22e-05	0.00304169	#N/A	#N/A	#N/A	#N/A	#N/A
Mt0002_00675	Medtr1g022325		0.75	0.5	0.66	1.88	1.44	1.49	0.636667	1.60333	1.3325	9.24e-05	0.00304485	E	4-hydroxyphenylpyruvate	-	GO:0003674,GO:0003824,GO:0003868,GO:0005488,GO:0005515,GO:0005575,GO:0005622,GO:0005623,GO:0005737,GO:0006082,GO:0006520,GO:0006558,GO:0006559,GO:0006570,GO:0006572,GO:0006725,GO:0006807,GO:0008150,GO:0008152,GO:0009056,GO:0009063,GO:0009072,GO:0009074,GO:0009987,GO:0016054,GO:0016491,GO:0016701,GO:0016702,GO:0017144,GO:0019439,GO:0019752,GO:0042737,GO:0042802,GO:0043167,GO:0043169,GO:0043436,GO:…	ko:K00457
Mt0037_00248	Medtr8g040935		2.3	2.18	2.4	1.26	0.77	0.6	2.29333	0.876667	-1.3873	9.34e-05	0.00307235	S	F-box kelch-repeat protein	-	-	-
Mt0003_00277	Medtr4g057257	NCR	0.89	0.93	1.74	0.37	0.19	0.27	1.18667	0.276667	-2.1007	9.7e-05	0.00318463	#N/A	#N/A	#N/A	#N/A	#N/A
Mt0029_10085	Medtr1g110510		6.24	6.91	8.37	39.23	9.33	21.03	7.17333	23.1967	1.6932	9.92e-05	0.00323288	S	endonuclease	-	GO:0003674,GO:0003676,GO:0003824,GO:0004518,GO:0004519,GO:0005488,GO:0006139,GO:0006259,GO:0006308,GO:0006725,GO:0006807,GO:0008150,GO:0008152,GO:0009056,GO:0009057,GO:0009987,GO:0016787,GO:0016788,GO:0019439,GO:0034641,GO:0034655,GO:0043167,GO:0043169,GO:0043170,GO:0044237,GO:0044238,GO:0044248,GO:0044260,GO:0044265,GO:0044270,GO:0046483,GO:0046700,GO:0046872,GO:0071704,GO:0090304,GO:0090305,GO:…	-
Mt0089_00060	Medtr4g057260		9.54	7.86	10.41	4.95	2.92	5.18	9.27	4.35	-1.0916	9.92e-05	0.00323288	T	Belongs to the protein kinase superfamily. Ser Thr protein kinase family	BRL2	GO:0000166,GO:0003002,GO:0003674,GO:0003824,GO:0004672,GO:0004674,GO:0004675,GO:0004888,GO:0005488,GO:0005524,GO:0005575,GO:0005623,GO:0005886,GO:0006464,GO:0006468,GO:0006793,GO:0006796,GO:0006807,GO:0006810,GO:0007154,GO:0007165,GO:0007166,GO:0007167,GO:0007178,GO:0007275,GO:0007389,GO:0008144,GO:0008150,GO:0008152,GO:0009719,GO:0009725,GO:0009733,GO:0009734,GO:0009741,GO:0009742,GO:0009755,GO:…	ko:K13415
Mt0093_00029	Medtr6g038290	NCR222-TC37121	1.17	1.59	1.48	0.43	0.38	0.6	1.41333	0.47	-1.5884	9.92e-05	0.00323288	#N/A	#N/A	#N/A	#N/A	#N/A
Mt0036_10176	Medtr3g051790		0.45	1.06	0.82	0.15	0.13	0.07	0.776667	0.116667	-2.7349	9.97e-05	0.00324587	S	Benzyl alcohol	-	GO:0003674,GO:0003824,GO:0016740,GO:0016746,GO:0016747	ko:K19861
Mt0050_00129	Medtr5g041445	NCR038-TC34692	5.94	4.2	6.2	2.89	2.28	2.85	5.44667	2.67333	-1.0267	0.000100454	0.00326702	#N/A	#N/A	#N/A	#N/A	#N/A
Mt0002_00184	Medtr1g010250		1.48	1.29	1.77	13.14	1.41	11.38	1.51333	8.64333	2.5139	0.000101126	0.00328084	T	Wall-associated receptor kinase	-	GO:0000166,GO:0000902,GO:0001101,GO:0001871,GO:0003674,GO:0003824,GO:0004672,GO:0004674,GO:0005488,GO:0005509,GO:0005524,GO:0005575,GO:0005618,GO:0005622,GO:0005623,GO:0005737,GO:0005773,GO:0005886,GO:0005975,GO:0006464,GO:0006468,GO:0006793,GO:0006796,GO:0006807,GO:0006884,GO:0006950,GO:0006952,GO:0007154,GO:0007165,GO:0007166,GO:0008144,GO:0008150,GO:0008152,GO:0008361,GO:0009311,GO:0009505,GO:…	-
Mt0018_00470	Medtr2g435310		1.2	0.73	2.69	6.37	3.85	5.31	1.54	5.17667	1.7491	0.000101271	0.00328148	J	Major allergen Pru ar	-	GO:0006950,GO:0006952,GO:0008150,GO:0009607,GO:0050896	-
Mt0007_10643	Medtr3g101320		5.32	3.9	6.14	8.43	14.43	9.95	5.12	10.9367	1.095	0.000103705	0.00335111	S	Protein of unknown function (DUF1645)	-	-	-
Mt0028_10101	Medtr8g018735		4.36	2.71	3.81	5.48	13.82	10.85	3.62667	10.05	1.4705	0.000106202	0.00342551	E	Plant lipoxygenase may be involved in a number of diverse aspects of plant physiology including growth and development, pest resistance, and senescence or responses to wounding	LOX2	GO:0003674,GO:0003824,GO:0005488,GO:0005575,GO:0005622,GO:0005623,GO:0005737,GO:0006082,GO:0006629,GO:0006631,GO:0006633,GO:0008150,GO:0008152,GO:0008610,GO:0009058,GO:0009987,GO:0016053,GO:0016491,GO:0016701,GO:0016702,GO:0019752,GO:0031407,GO:0031408,GO:0032787,GO:0043167,GO:0043169,GO:0043436,GO:0044237,GO:0044238,GO:0044249,GO:0044255,GO:0044281,GO:0044283,GO:0044424,GO:0044464,GO:0046394,GO:…	ko:K00454,ko:K15718
Mt0012_00298	Medtr5g041940		18.46	11	26.62	42.18	47.04	36.42	18.6933	41.88	1.1637	0.000106429	0.00342969	K	NAC transcription factor	NAP	GO:0000003,GO:0003006,GO:0003674,GO:0003676,GO:0003677,GO:0003700,GO:0005488,GO:0005575,GO:0005622,GO:0005623,GO:0005634,GO:0006139,GO:0006351,GO:0006355,GO:0006725,GO:0006807,GO:0007275,GO:0007568,GO:0008150,GO:0008152,GO:0009058,GO:0009059,GO:0009790,GO:0009791,GO:0009793,GO:0009825,GO:0009835,GO:0009889,GO:0009908,GO:0009987,GO:0010150,GO:0010154,GO:0010467,GO:0010468,GO:0010556,GO:0016049,GO:…	-
Mt0007_10846	Medtr3g105340		0.34	0.33	0.23	4.65	0.93	0.86	0.3	2.14667	2.8391	0.000112721	0.00360933	#N/A	#N/A	#N/A	#N/A	#N/A
Mt0013_00357	Medtr3g463020		0.17	0.3	0.07	0.52	1.35	1.69	0.18	1.18667	2.7208	0.000113643	0.00363553	O	E3 ubiquitin-protein ligase	-	GO:0001101,GO:0003674,GO:0003824,GO:0004842,GO:0005488,GO:0005575,GO:0005622,GO:0005623,GO:0005634,GO:0005737,GO:0006464,GO:0006508,GO:0006511,GO:0006807,GO:0006950,GO:0006970,GO:0007154,GO:0007165,GO:0008150,GO:0008152,GO:0009056,GO:0009057,GO:0009628,GO:0009651,GO:0009719,GO:0009725,GO:0009737,GO:0009738,GO:0009755,GO:0009787,GO:0009789,GO:0009966,GO:0009967,GO:0009987,GO:0010033,GO:0010498,GO:…	ko:K16282
Mt0005_01059	Medtr5g026080	NCR227-TC31838	3.36	2.18	3.41	0.8	0.96	1.46	2.98333	1.07333	-1.4748	0.000113966	0.00364255	#N/A	#N/A	#N/A	#N/A	#N/A
Mt0085_00057	Medtr7g028780		3.29	2.38	3.48	0.86	0.71	1.56	3.05	1.04333	-1.5476	0.000116063	0.00370288	-	-	-	-	-
Mt0032_00325	Medtr6g453240	NCR	1.24	0.93	1.02	0.31	0.19	0.36	1.06333	0.286667	-1.8911	0.000121137	0.00384878	#N/A	#N/A	#N/A	#N/A	#N/A
Mt0047_10204	Medtr2g066255	NCR	5.04	4.06	4.96	1.72	0.83	2.36	4.68667	1.63667	-1.5178	0.000121183	0.00384878	#N/A	#N/A	#N/A	#N/A	#N/A
Mt0092_00063	Medtr4g048110		0.86	0.53	0.79	0.09	0.13	0.17	0.726667	0.13	-2.4828	0.000121432	0.00385323	-	-	-	-	-
Mt0005_00801	Medtr5g021390	CP450	2.44	3.24	2.56	21.51	3.82	8.49	2.74667	11.2733	2.0372	0.000122639	0.00388451	Q	Belongs to the cytochrome P450 family	-	GO:0003674,GO:0003824,GO:0004497,GO:0005488,GO:0005506,GO:0005575,GO:0005622,GO:0005623,GO:0005737,GO:0005783,GO:0006725,GO:0008150,GO:0008152,GO:0009058,GO:0009314,GO:0009411,GO:0009416,GO:0009628,GO:0009698,GO:0009699,GO:0009808,GO:0009809,GO:0009987,GO:0010224,GO:0012505,GO:0016020,GO:0016021,GO:0016491,GO:0016705,GO:0016709,GO:0019438,GO:0019748,GO:0020037,GO:0031224,GO:0043167,GO:0043169,GO:…	ko:K09755
Mt0010_20085	Medtr5g081640		0.62	0.56	1.18	2.15	1.89	1.99	0.786667	2.01	1.3534	0.000123494	0.00390808	#N/A	#N/A	#N/A	#N/A	#N/A
Mt0057_10209	Medtr1g104550		0.07	0.1	0.13	0.77	0.35	1.03	0.1	0.716667	2.8413	0.000128446	0.00405153	Q	amine oxidase	-	GO:0001101,GO:0003674,GO:0003824,GO:0005488,GO:0005507,GO:0005575,GO:0005576,GO:0005618,GO:0005623,GO:0006807,GO:0007154,GO:0007165,GO:0008131,GO:0008150,GO:0008152,GO:0009308,GO:0009719,GO:0009725,GO:0009753,GO:0009755,GO:0009867,GO:0009888,GO:0009987,GO:0010033,GO:0010035,GO:0010087,GO:0010089,GO:0010941,GO:0016491,GO:0016638,GO:0016641,GO:0023052,GO:0030312,GO:0032502,GO:0032870,GO:0042221,GO:…	ko:K00276
Mt0005_10995	Medtr5g026077		1.48	1.32	1.21	0.58	0.26	0.4	1.33667	0.413333	-1.6933	0.000128532	0.00405153	#N/A	#N/A	#N/A	#N/A	#N/A
Mt0033_10032	Medtr6g028110		0.31	0.4	0.2	1.51	0.8	1.03	0.303333	1.11333	1.8759	0.000128602	0.00405153	G	Lysosomal beta glucosidase-like	-	-	ko:K01188,ko:K05349
Mt0004_10368	Medtr1g056910		0.96	0.73	1.12	3.08	2.05	1.76	0.936667	2.29667	1.2939	0.000129761	0.0040781	O	RING-type E3 ubiquitin transferase	-	GO:0001101,GO:0003674,GO:0003824,GO:0004842,GO:0005575,GO:0005622,GO:0005623,GO:0005737,GO:0005829,GO:0006464,GO:0006807,GO:0006950,GO:0006952,GO:0008150,GO:0008152,GO:0009414,GO:0009415,GO:0009628,GO:0009987,GO:0010033,GO:0010035,GO:0010200,GO:0010243,GO:0016567,GO:0016740,GO:0019538,GO:0019787,GO:0032446,GO:0036211,GO:0042221,GO:0042493,GO:0043170,GO:0043412,GO:0044237,GO:0044238,GO:0044260,GO:…	-
Mt0027_10127	Medtr1g097170		0.03	0	0	0.49	0.26	0.6	0.01	0.45	5.4919	0.000132072	0.00413496	#N/A	#N/A	#N/A	#N/A	#N/A
Mt0046_10022	Medtr4g009310		0.24	0.96	1.31	11.08	1.38	5.01	0.836667	5.82333	2.7991	0.000135007	0.00421935	S	Protein GAMETE EXPRESSED	-	GO:0000003,GO:0003006,GO:0003674,GO:0005488,GO:0005515,GO:0005575,GO:0005623,GO:0005886,GO:0005887,GO:0007275,GO:0008150,GO:0009553,GO:0009555,GO:0009790,GO:0009791,GO:0009793,GO:0010154,GO:0016020,GO:0016021,GO:0022414,GO:0031224,GO:0031226,GO:0032501,GO:0032502,GO:0042802,GO:0044425,GO:0044459,GO:0044464,GO:0048229,GO:0048316,GO:0048608,GO:0048731,GO:0048856,GO:0061458,GO:0071944	ko:K18171,ko:K18626
Mt0066_10003	Medtr7g061720		5.18	6.97	9.03	3.82	3.53	2.49	7.06	3.28	-1.106	0.000136	0.00423911	S	Rare lipoprotein A (RlpA)-like double-psi beta-barrel	-	-	ko:K20628
Mt0002_00799	Medtr1g025960		0.03	0.4	0.3	1.45	0.9	1.43	0.243333	1.26	2.3724	0.000137896	0.00429441	S	UPF0496 protein At1g20180-like	-	GO:0005575,GO:0016020,GO:0016021,GO:0031224,GO:0044425	-
Mt0101_10074	Medtr2g437910		11.32	13.32	26.1	59.57	33.38	33.17	16.9133	42.04	1.3136	0.000138125	0.00429773	T	Vacuolar-sorting receptor	-	GO:0000139,GO:0003674,GO:0005488,GO:0005509,GO:0005575,GO:0005622,GO:0005623,GO:0005737,GO:0005768,GO:0005770,GO:0005794,GO:0006810,GO:0008104,GO:0008150,GO:0010008,GO:0012505,GO:0012506,GO:0015031,GO:0015833,GO:0016020,GO:0016021,GO:0030135,GO:0030136,GO:0030659,GO:0030662,GO:0030665,GO:0031090,GO:0031224,GO:0031410,GO:0031902,GO:0031982,GO:0031984,GO:0033036,GO:0042886,GO:0043167,GO:0043169,GO:…	-
Mt0011_10243	Medtr7g089950		3.5	3.77	3.32	1.38	1.64	2.06	3.53	1.69333	-1.0598	0.000141909	0.0044077	T	phosphatidylinositol 4-phosphate 5-kinase	-	GO:0000003,GO:0000166,GO:0000902,GO:0000904,GO:0003006,GO:0003674,GO:0003824,GO:0005488,GO:0005524,GO:0005575,GO:0005622,GO:0005623,GO:0005737,GO:0005829,GO:0005886,GO:0006629,GO:0006644,GO:0006650,GO:0006793,GO:0006796,GO:0006810,GO:0006897,GO:0007164,GO:0008144,GO:0008150,GO:0008152,GO:0009653,GO:0009664,GO:0009826,GO:0009827,GO:0009846,GO:0009856,GO:0009860,GO:0009932,GO:0009987,GO:0010118,GO:…	ko:K00889
Mt0018_00034	Medtr6g025770		1.78	1.92	2.4	0.31	0.93	0.33	2.03333	0.523333	-1.958	0.000142328	0.00441293	#N/A	#N/A	#N/A	#N/A	#N/A
Mt0038_00083	Medtr8g063480		0.17	0.03	0.03	0.77	0.42	0.86	0.0766667	0.683333	3.1559	0.000144563	0.00447434	Q	ABC transporter B family member	PGP10	GO:0000166,GO:0003674,GO:0003824,GO:0005215,GO:0005488,GO:0005524,GO:0005575,GO:0005622,GO:0005623,GO:0005737,GO:0005739,GO:0006810,GO:0008144,GO:0008150,GO:0015399,GO:0015405,GO:0016020,GO:0016021,GO:0016462,GO:0016787,GO:0016817,GO:0016818,GO:0016887,GO:0017076,GO:0017111,GO:0022804,GO:0022857,GO:0030554,GO:0031224,GO:0032553,GO:0032555,GO:0032559,GO:0035639,GO:0036094,GO:0042623,GO:0042626,GO:…	ko:K05658
Mt0032_00120	Medtr6g045077		28.13	18.87	32.89	41.78	83.99	56.1	26.63	60.6233	1.1868	0.000144758	0.00447643	-	-	-	-	-
Mt0066_00157	Medtr8g031900		0.86	0.86	1.02	1.88	1.8	2.82	0.913333	2.16667	1.2463	0.000146141	0.00450733	Q	( )-neomenthol	-	-	ko:K15095
Mt0017_10562	Medtr3g018970		0.31	0.4	0.2	0	0	0	0.303333	0.001	-8.2448	0.0001474	0.00454217	T	disease resistance	-	-	ko:K19613
Mt0007_00627	Medtr3g101410		14.92	11.6	6.07	23.23	24.53	35.23	10.8633	27.6633	1.3485	0.000148504	0.00457222	I	lipolytic acyl hydrolase (LAH)	-	-	-
Mt0002_10451	Medtr1g018580		0.03	0.07	0.53	1.69	1.67	1.36	0.21	1.57333	2.9054	0.000149602	0.00459397	S	3-oxo-Delta(4,5)-steroid 5-beta-reductase-like	-	GO:0003002,GO:0003674,GO:0003824,GO:0005575,GO:0005622,GO:0005623,GO:0005737,GO:0005829,GO:0006629,GO:0006950,GO:0007275,GO:0007389,GO:0008150,GO:0008152,GO:0008202,GO:0009611,GO:0010051,GO:0016491,GO:0016627,GO:0016628,GO:0032501,GO:0032502,GO:0035671,GO:0044238,GO:0044424,GO:0044444,GO:0044464,GO:0047787,GO:0048856,GO:0050896,GO:0055114,GO:0071704,GO:1901360	ko:K22419
Mt0060_00044	Medtr3g046760		6.45	10.57	10.31	5.29	3.69	4.58	9.11	4.52	-1.0111	0.000149845	0.00459742	T	Eukaryotic cytochrome b561	-	GO:0003674,GO:0005488,GO:0005575,GO:0008150,GO:0008152,GO:0016020,GO:0016021,GO:0031224,GO:0043167,GO:0043169,GO:0044425,GO:0046872,GO:0055114	-
Mt0028_00325	Medtr8g026960	MtHB1	6.18	4.82	2.27	11.17	10.94	11.68	4.42333	11.2633	1.3484	0.00015327	0.00468798	K	Homeobox-leucine zipper protein	-	GO:0001101,GO:0003674,GO:0003676,GO:0003677,GO:0003700,GO:0005488,GO:0005575,GO:0005622,GO:0005623,GO:0005634,GO:0006139,GO:0006351,GO:0006355,GO:0006725,GO:0006807,GO:0006950,GO:0006970,GO:0007275,GO:0008150,GO:0008152,GO:0009058,GO:0009059,GO:0009414,GO:0009415,GO:0009605,GO:0009607,GO:0009615,GO:0009628,GO:0009719,GO:0009725,GO:0009737,GO:0009889,GO:0009891,GO:0009893,GO:0009987,GO:0010033,GO:…	ko:K09338
Mt0019_10187	Medtr2g083920		1.06	1.32	1.18	4.31	1.83	3.05	1.18667	3.06333	1.3682	0.000153439	0.00468798	O	4Fe-4S single cluster domain of Ferredoxin I	-	GO:0000002,GO:0000122,GO:0000166,GO:0001775,GO:0001776,GO:0001932,GO:0001933,GO:0001941,GO:0001959,GO:0001960,GO:0002260,GO:0002376,GO:0002520,GO:0002521,GO:0002682,GO:0002683,GO:0002684,GO:0002694,GO:0002696,GO:0003674,GO:0005102,GO:0005126,GO:0005133,GO:0005488,GO:0005515,GO:0005524,GO:0005575,GO:0005622,GO:0005623,GO:0005634,GO:0005737,GO:0005739,GO:0005759,GO:0005829,GO:0005856,GO:0005884,GO:…	-
Mt0057_10118	Medtr1g105850		3.33	3.3	3.81	9.45	4.49	9.35	3.48	7.76333	1.1576	0.000153462	0.00468798	T	Cysteine-rich receptor-like protein kinase	-	-	-
Mt0087_10033	Medtr6g465050		0.34	0.4	0.53	0.03	0	0	0.423333	0.01	-5.4037	0.000153765	0.00469317	#N/A	#N/A	#N/A	#N/A	#N/A
Mt0066_10070	Medtr8g033140		0.34	0.63	0.36	1.97	0.93	1.56	0.443333	1.48667	1.7456	0.00015484	0.00472187	-	-	-	-	-
Mt0001_10231	Medtr4g131030		0.03	0.03	0.03	0.43	0.32	0.8	0.03	0.516667	4.1062	0.000155552	0.0047395	K	Agamous-like MADS-box protein	-	GO:0000976,GO:0000977,GO:0001012,GO:0001067,GO:0003674,GO:0003676,GO:0003677,GO:0003690,GO:0003700,GO:0005488,GO:0005515,GO:0005575,GO:0005622,GO:0005623,GO:0005634,GO:0006139,GO:0006351,GO:0006355,GO:0006357,GO:0006725,GO:0006807,GO:0007275,GO:0008150,GO:0008152,GO:0009058,GO:0009059,GO:0009553,GO:0009559,GO:0009561,GO:0009889,GO:0009891,GO:0009893,GO:0009987,GO:0010467,GO:0010468,GO:0010556,GO:…	ko:K04454,ko:K09260
Mt0008_00488	Medtr5g063490	NCR	14	15.4	21.3	9.23	4.36	8.29	16.9	7.29333	-1.2124	0.000162391	0.00493505	#N/A	#N/A	#N/A	#N/A	#N/A
Mt0025_00324	Medtr6g012670		0	0	0	1.08	0.19	0.13	0.001	0.466667	8.8662	0.000162819	0.00493954	K	NAC domain-containing protein	-	GO:0000302,GO:0001101,GO:0002682,GO:0002684,GO:0003674,GO:0003676,GO:0003677,GO:0003700,GO:0005488,GO:0005515,GO:0005575,GO:0005622,GO:0005623,GO:0005634,GO:0006139,GO:0006351,GO:0006355,GO:0006725,GO:0006807,GO:0006950,GO:0006970,GO:0006979,GO:0007275,GO:0007568,GO:0007569,GO:0008150,GO:0008152,GO:0009058,GO:0009059,GO:0009611,GO:0009628,GO:0009636,GO:0009651,GO:0009719,GO:0009723,GO:0009725,GO:…	-
Mt0070_10016	Medtr6g066190		12.93	14.11	11.85	20.92	37.17	20.67	12.9633	26.2533	1.0181	0.000168068	0.00508128	S	Soybean trypsin inhibitor (Kunitz) family of protease inhibitors	-	-	-
Mt0010_10429	Medtr5g086810		0.41	0.53	0.85	5.48	0.8	3.35	0.596667	3.21	2.4276	0.00016828	0.00508332	V	Receptor-like protein	-	GO:0005575,GO:0005623,GO:0005886,GO:0008150,GO:0009888,GO:0010073,GO:0016020,GO:0016021,GO:0031224,GO:0032501,GO:0032502,GO:0044425,GO:0044464,GO:0048507,GO:0048856,GO:0071944	-
Mt0003_10786	Medtr4g069160		0.48	0.56	0.53	1.35	1.51	1.13	0.523333	1.33	1.3456	0.000173296	0.00521079	S	UPF0496 protein At4g34320-like	-	-	-
Mt0002_00876	Medtr1g027680		9.5	8.26	6.73	11.11	25.11	22.92	8.16333	19.7133	1.2719	0.000173387	0.00521079	T	receptor-like protein kinase	-	-	-
Mt0067_00024	Medtr7g109930		0.48	0.46	0.49	0.03	0.03	0.07	0.476667	0.0433333	-3.4594	0.00017537	0.00526139	P	cellular transition metal ion homeostasis	-	-	-
Mt0073_10069	Medtr2g450700		0	0	0.03	0.46	0.61	0.23	0.01	0.433333	5.4374	0.000180337	0.00540122	-	-	-	-	-
Mt0086_00070	Medtr7g065635	NCR	7.96	8.99	9.09	4.22	2.24	4.98	8.68	3.81333	-1.1866	0.000182065	0.00544372	#N/A	#N/A	#N/A	#N/A	#N/A
Mt0004_00972	Medtr1g072110		1.13	1.52	2.89	5.85	4.04	4.05	1.84667	4.64667	1.3313	0.000185505	0.00553248	S	Transcriptional repressor, ovate	-	-	-
Mt0042_10062	Medtr7g106830		0.1	0.17	0.53	2.09	0.83	1.29	0.266667	1.40333	2.3957	0.000196774	0.00584374	E	Bifunctional aspartate aminotransferase and glutamate aspartate-prephenate	-	GO:0000003,GO:0003006,GO:0003674,GO:0003824,GO:0004069,GO:0005488,GO:0005575,GO:0005622,GO:0005623,GO:0005737,GO:0006082,GO:0006520,GO:0006558,GO:0006725,GO:0006807,GO:0007275,GO:0008144,GO:0008150,GO:0008152,GO:0008483,GO:0008652,GO:0009058,GO:0009072,GO:0009073,GO:0009094,GO:0009095,GO:0009507,GO:0009532,GO:0009536,GO:0009570,GO:0009790,GO:0009791,GO:0009793,GO:0009987,GO:0010154,GO:0016053,GO:…	ko:K15849
Mt0003_10570	Medtr4g063740	NCR	2.37	1.59	2.36	0.92	0.51	0.9	2.10667	0.776667	-1.4396	0.000197121	0.00584374	#N/A	#N/A	#N/A	#N/A	#N/A
Mt0010_00885	Medtr5g094730		1.2	1.35	1.18	2.12	2.98	2.52	1.24333	2.54	1.0306	0.000204833	0.00603734	L	transposition, RNA-mediated	-	-	-
Mt0063_00006	Medtr5g075340		8.13	7.7	13.66	18.77	27.71	16.12	9.83	20.8667	1.0859	0.00020806	0.00612222	O	ATP-dependent zinc metalloprotease FTSH	-	GO:0000166,GO:0003674,GO:0003824,GO:0004175,GO:0004176,GO:0004222,GO:0005488,GO:0005524,GO:0005575,GO:0005622,GO:0005623,GO:0005737,GO:0005739,GO:0005740,GO:0005743,GO:0006508,GO:0006807,GO:0008144,GO:0008150,GO:0008152,GO:0008233,GO:0008237,GO:0009507,GO:0009526,GO:0009536,GO:0009888,GO:0009941,GO:0010073,GO:0016020,GO:0016021,GO:0016462,GO:0016787,GO:0016817,GO:0016818,GO:0016887,GO:0017076,GO:…	ko:K08955
Mt0012_00306	Medtr5g041780		0.51	0.99	0.85	2.58	1.51	1.92	0.783333	2.00333	1.3547	0.000210176	0.00617145	Q	Methyltransferase-like protein	-	-	-
Mt0027_10181	Medtr1g095730		0.1	0.07	0.13	0.77	0.74	0.36	0.1	0.623333	2.64	0.000212544	0.00622815	-	-	-	-	-
Mt0001_11504	Medtr4g098930		0.34	0.46	1.31	4.55	3.27	1.49	0.703333	3.10333	2.1415	0.000213227	0.00624295	S	Belongs to the expansin family	-	GO:0005575,GO:0005576	-
Mt0024_00122	Medtr6g084940		4.7	4.82	5.94	14.65	7.25	9.09	5.15333	10.33	1.0033	0.000215497	0.00628853	S	PLAC8 family	-	-	-
Mt0070_10078	Medtr6g463360		6.55	4.53	5.71	2.8	1.73	3.05	5.59667	2.52667	-1.1473	0.000216173	0.00629807	S	Salicylate	-	GO:0003674,GO:0003824,GO:0005488,GO:0008150,GO:0008152,GO:0008168,GO:0016740,GO:0016741,GO:0032259,GO:0043167,GO:0043169,GO:0046872	ko:K08241,ko:K21482,ko:K21483
Mt0016_00578	Medtr2g091210		0	0.03	0.03	1.11	0.22	0.46	0.02	0.596667	4.8989	0.000218822	0.00635396	S	Protein of unknown function, DUF538	-	-	-
Mt0015_10610	Medtr0599s0010		0	0	0.03	0.31	0.35	0.5	0.01	0.386667	5.273	0.00022928	0.00664121	S	Belongs to the terpene synthase family	CPS1	GO:0000287,GO:0001101,GO:0003674,GO:0003824,GO:0005488,GO:0005575,GO:0005622,GO:0005623,GO:0005737,GO:0006082,GO:0006629,GO:0006720,GO:0006721,GO:0006950,GO:0006952,GO:0007154,GO:0007165,GO:0008150,GO:0008152,GO:0008299,GO:0008610,GO:0009058,GO:0009507,GO:0009536,GO:0009685,GO:0009686,GO:0009719,GO:0009725,GO:0009739,GO:0009740,GO:0009755,GO:0009905,GO:0009987,GO:0010033,GO:0010333,GO:0010476,GO:…	ko:K04120,ko:K14043
Mt0008_10861	Medtr6g086380		5.73	8.33	11.42	65.14	8.53	36.19	8.49333	36.62	2.1082	0.000230082	0.00665896	O	Belongs to the peptidase S10 family	-	GO:0003674,GO:0003824,GO:0004180,GO:0004185,GO:0005575,GO:0005576,GO:0005618,GO:0005623,GO:0006508,GO:0006807,GO:0008150,GO:0008152,GO:0008233,GO:0008236,GO:0008238,GO:0009056,GO:0009057,GO:0009987,GO:0016787,GO:0017171,GO:0019538,GO:0030163,GO:0030312,GO:0043170,GO:0044237,GO:0044238,GO:0044248,GO:0044257,GO:0044260,GO:0044265,GO:0044267,GO:0044464,GO:0051603,GO:0070008,GO:0070011,GO:0071704,GO:…	ko:K16297
Mt0022_10224	Medtr7g056393		0.99	0.79	0.39	1.42	2.89	3.48	0.723333	2.59667	1.8439	0.000232542	0.00671361	Q	Belongs to the iron ascorbate-dependent oxidoreductase family	-	-	-
Mt0026_10076	Medtr7g068250		0	0.03	0.07	0.8	0.35	0.36	0.0333333	0.503333	3.9165	0.000234595	0.00676178	S	Belongs to the yippee family	-	-	-
Mt0005_01072	Medtr5g026350		2.37	2.25	3.05	1.32	1.15	1.19	2.55667	1.22	-1.0674	0.000235031	0.00676883	S	Nodulin-like	-	GO:0000741,GO:0005575,GO:0005622,GO:0005623,GO:0005737,GO:0005739,GO:0006950,GO:0006970,GO:0006996,GO:0006997,GO:0007275,GO:0008150,GO:0009553,GO:0009559,GO:0009561,GO:0009628,GO:0009651,GO:0009987,GO:0010197,GO:0016020,GO:0016021,GO:0016043,GO:0030154,GO:0031224,GO:0032501,GO:0032502,GO:0043226,GO:0043227,GO:0043229,GO:0043231,GO:0044424,GO:0044425,GO:0044444,GO:0044464,GO:0048229,GO:0048284,GO:…	-
Mt0198_00003	Medtr0009s0050		5.45	4.23	6.57	9.02	16.42	9.59	5.41667	11.6767	1.1082	0.00023835	0.00684201	Q	Belongs to the iron ascorbate-dependent oxidoreductase family	-	GO:0003674,GO:0003824,GO:0005488,GO:0007275,GO:0007568,GO:0008150,GO:0008152,GO:0010150,GO:0016491,GO:0016679,GO:0016682,GO:0032501,GO:0032502,GO:0043167,GO:0043169,GO:0046872,GO:0048366,GO:0048367,GO:0048731,GO:0048827,GO:0048856,GO:0055114,GO:0090693,GO:0099402	-
Mt0017_00283	Medtr3g011960		0.14	0.17	0.16	0.52	0.87	0.7	0.156667	0.696667	2.1528	0.000245805	0.00703882	T	Cysteine-rich receptor-like protein kinase	-	-	-
Mt0028_00272	Medtr8g023840		0.45	0.56	0.33	1.6	1.51	0.9	0.446667	1.33667	1.5814	0.0002499	0.00713868	S	NAC domain-containing protein 69-like	-	GO:0003674,GO:0003676,GO:0003677,GO:0003700,GO:0005488,GO:0005575,GO:0005622,GO:0005623,GO:0005634,GO:0005886,GO:0006139,GO:0006351,GO:0006355,GO:0006725,GO:0006807,GO:0008150,GO:0008152,GO:0009058,GO:0009059,GO:0009889,GO:0009891,GO:0009893,GO:0009987,GO:0010467,GO:0010468,GO:0010556,GO:0010557,GO:0010604,GO:0010628,GO:0016020,GO:0016021,GO:0016070,GO:0018130,GO:0019219,GO:0019222,GO:0019438,GO:…	-
Mt0010_00902	Medtr5g095200		2.47	3.47	5.06	11.72	7.41	6	3.66667	8.37667	1.1919	0.000252302	0.00719722	V	Receptor-like protein	-	GO:0005575,GO:0005623,GO:0005886,GO:0008150,GO:0009888,GO:0010073,GO:0016020,GO:0016021,GO:0031224,GO:0032501,GO:0032502,GO:0044425,GO:0044464,GO:0048507,GO:0048856,GO:0071944	-
Mt0029_00279	Medtr2g103490		1.3	1.02	1.9	2.89	3.37	2.65	1.40667	2.97	1.0782	0.000264591	0.00750355	S	glyoxalase I family protein	-	-	-
Mt0040_10261	Medtr3g114890		0.89	1.22	2.07	3.57	3.62	2.62	1.39333	3.27	1.2308	0.000269747	0.00758551	E	Belongs to the Orn Lys Arg decarboxylase class-II family	ODC	GO:0003674,GO:0003824,GO:0004586,GO:0005575,GO:0005622,GO:0005623,GO:0005737,GO:0006082,GO:0006520,GO:0006576,GO:0006591,GO:0006595,GO:0006596,GO:0006807,GO:0008150,GO:0008152,GO:0009058,GO:0009308,GO:0009309,GO:0009445,GO:0009446,GO:0009987,GO:0016829,GO:0016830,GO:0016831,GO:0019752,GO:0033387,GO:0034641,GO:0042401,GO:0043436,GO:0044106,GO:0044237,GO:0044238,GO:0044249,GO:0044271,GO:0044281,GO:…	ko:K01581
Mt0012_00059	Medtr5g047060		1.44	1.69	1.71	6.28	2.34	3.75	1.61333	4.12333	1.3538	0.00027481	0.00771263	T	Carbohydrate-binding protein of the ER	-	-	-
Mt0032_10240	Medtr6g048440		1.61	1.78	3.38	5.63	5.58	3.95	2.25667	5.05333	1.163	0.0002826	0.00790606	S	Belongs to the sterol desaturase family	-	GO:0003674,GO:0003824,GO:0005488,GO:0005506,GO:0005575,GO:0005622,GO:0005623,GO:0005737,GO:0006629,GO:0006720,GO:0006721,GO:0008150,GO:0008152,GO:0008299,GO:0008610,GO:0009058,GO:0009507,GO:0009526,GO:0009536,GO:0009941,GO:0009987,GO:0016020,GO:0016021,GO:0016108,GO:0016109,GO:0016114,GO:0016116,GO:0016117,GO:0016122,GO:0016123,GO:0016491,GO:0016787,GO:0031090,GO:0031224,GO:0031967,GO:0031969,GO:…	ko:K15746
Mt0001_10044	Medtr4g134320		0.27	0.5	0.39	0.71	1.83	2.02	0.386667	1.52	1.9749	0.000282919	0.00790871	O	Subtilisin-like protease	-	-	-
Mt0013_10136	Medtr3g467340		0.48	0.4	0.3	1.82	0.87	1.13	0.393333	1.27333	1.6948	0.00028531	0.0079629	T	Belongs to the disease resistance NB-LRR family	-	-	ko:K13459
Mt0042_10029	Medtr7g106120		0	0	0	0.37	0.26	0.17	0.001	0.266667	8.0589	0.000288285	0.00801855	S	Late embryogenesis abundant protein	-	-	-
Mt0022_10430	Medtr7g050690		4.08	3.4	3.61	1.42	0.48	1.69	3.69667	1.19667	-1.6272	0.000288442	0.00801855	S	Retrotransposon gag protein	-	-	-
Mt0011_00653	Medtr7g081580		44.29	45.56	68.31	161.32	80.4	84.99	52.72	108.903	1.0466	0.000297481	0.00821794	O	Subtilisin-like protease	-	-	-
Mt0003_11673	Medtr4g088345		0.27	0.23	0	0.71	2.44	1.16	0.166667	1.43667	3.1077	0.00031581	0.00864965	S	Belongs to the class I-like SAM-binding methyltransferase superfamily. Cation-independent O- methyltransferase family	-	GO:0003674,GO:0003824,GO:0005488,GO:0005515,GO:0006725,GO:0008150,GO:0008152,GO:0008168,GO:0008171,GO:0008757,GO:0009058,GO:0009698,GO:0009699,GO:0009987,GO:0016740,GO:0016741,GO:0019438,GO:0019748,GO:0032259,GO:0044237,GO:0044249,GO:0044550,GO:0046983,GO:0050630,GO:0071704,GO:0102719,GO:1901360,GO:1901362,GO:1901576	ko:K13259,ko:K13262,ko:K16040
Mt0013_10259	Medtr3g031600		0.17	0.17	0.16	1.42	0.55	0.56	0.166667	0.843333	2.3391	0.000316064	0.00864989	T	Receptor protein kinase	-	GO:0000003,GO:0000166,GO:0003674,GO:0003824,GO:0004672,GO:0004674,GO:0005488,GO:0005524,GO:0005575,GO:0006464,GO:0006468,GO:0006793,GO:0006796,GO:0006807,GO:0007154,GO:0008037,GO:0008144,GO:0008150,GO:0008152,GO:0009856,GO:0009875,GO:0009987,GO:0016020,GO:0016021,GO:0016301,GO:0016310,GO:0016740,GO:0016772,GO:0016773,GO:0017076,GO:0019538,GO:0022414,GO:0030554,GO:0031224,GO:0032501,GO:0032553,GO:…	-
Mt0006_01150	Medtr3g031730		0.62	0.93	1.21	1.82	2.12	2.32	0.92	2.08667	1.1815	0.000318741	0.00870961	-	-	-	-	-
Mt0005_10915	Medtr6g065700		2.74	2.78	1.35	8	3.85	5.87	2.29	5.90667	1.367	0.000326324	0.00888923	T	Belongs to the protein kinase superfamily. Ser Thr protein kinase family	-	GO:0000003,GO:0000166,GO:0003006,GO:0003674,GO:0003824,GO:0004672,GO:0004674,GO:0005488,GO:0005524,GO:0005575,GO:0005623,GO:0005886,GO:0006464,GO:0006468,GO:0006793,GO:0006796,GO:0006807,GO:0007275,GO:0008144,GO:0008150,GO:0008152,GO:0009790,GO:0009791,GO:0009793,GO:0009888,GO:0009987,GO:0010065,GO:0010067,GO:0010087,GO:0010154,GO:0016020,GO:0016021,GO:0016301,GO:0016310,GO:0016740,GO:0016772,GO:…	ko:K04730
Mt0039_00055	Medtr1g090430		0	0.03	0.3	3.48	0.35	1.36	0.11	1.73	3.9752	0.000334902	0.00908076	G	Galactoside 2-alpha-L-fucosyltransferase-like	-	-	ko:K13681
Mt0002_10785	Medtr1g026750		1.1	1.82	1.05	0.52	0.32	0.4	1.32333	0.413333	-1.6788	0.000337322	0.00913935	E	POT family	-	GO:0003674,GO:0005215,GO:0005575,GO:0006810,GO:0008150,GO:0016020,GO:0016021,GO:0022857,GO:0031224,GO:0044425,GO:0051179,GO:0051234,GO:0055085	ko:K14638
Mt0004_00551	Medtr1g062110		0.41	0.46	0.39	1.23	0.96	1.13	0.42	1.10667	1.3978	0.000340095	0.00920033	Q	Belongs to the iron ascorbate-dependent oxidoreductase family	-	GO:0003674,GO:0003824,GO:0005488,GO:0006807,GO:0008150,GO:0008152,GO:0008168,GO:0009820,GO:0016491,GO:0016705,GO:0016706,GO:0016740,GO:0016741,GO:0032259,GO:0043167,GO:0043169,GO:0046872,GO:0051213,GO:0055114,GO:0071704,GO:0102802,GO:0102804,GO:1901564	-
Mt0003_00700	Medtr4g066240		1.34	1.95	4.96	11.91	15.33	4.48	2.75	10.5733	1.9429	0.000340596	0.0092068	G	Belongs to the glycosyl hydrolase 1 family	-	-	ko:K01188
Mt0015_10266	Medtr8g011350		36.98	41.66	50.85	249.16	44.54	134.68	43.1633	142.793	1.7261	0.000351878	0.00949258	O	Belongs to the peptidase S10 family	-	GO:0003674,GO:0003824,GO:0004180,GO:0005575,GO:0005576,GO:0005622,GO:0005623,GO:0005737,GO:0005773,GO:0005777,GO:0006508,GO:0006807,GO:0008150,GO:0008152,GO:0008233,GO:0008238,GO:0016740,GO:0016746,GO:0016747,GO:0016787,GO:0019538,GO:0019748,GO:0042579,GO:0043170,GO:0043226,GO:0043227,GO:0043229,GO:0043231,GO:0044238,GO:0044424,GO:0044444,GO:0044464,GO:0070011,GO:0071704,GO:0140096,GO:1901564	ko:K16296
Mt0086_10059	Medtr7g064010	NCR	6.86	4.63	5.84	2.31	2.18	3.48	5.77667	2.65667	-1.1206	0.000352898	0.00950792	#N/A	#N/A	#N/A	#N/A	#N/A
Mt0009_00690	Medtr8g099515		5.01	4.79	5.48	13.54	6.22	11.08	5.09333	10.28	1.0132	0.000354157	0.00952951	O	RING-H2 finger protein	-	GO:0003674,GO:0003824,GO:0004842,GO:0005488,GO:0005575,GO:0006464,GO:0006508,GO:0006511,GO:0006807,GO:0008150,GO:0008152,GO:0009056,GO:0009057,GO:0009987,GO:0010498,GO:0016020,GO:0016021,GO:0016567,GO:0016740,GO:0019538,GO:0019787,GO:0019941,GO:0030163,GO:0031224,GO:0032446,GO:0036211,GO:0043161,GO:0043167,GO:0043169,GO:0043170,GO:0043412,GO:0043632,GO:0044237,GO:0044238,GO:0044248,GO:0044257,GO:…	ko:K19041
Mt0017_10308	Medtr3g012310		0.34	0.17	0.39	2.77	0.87	0.83	0.3	1.49	2.3123	0.000356667	0.0095824	T	Belongs to the disease resistance NB-LRR family	-	GO:0000166,GO:0002376,GO:0003674,GO:0005488,GO:0005524,GO:0005575,GO:0005623,GO:0005886,GO:0006950,GO:0006952,GO:0006955,GO:0007154,GO:0007165,GO:0008144,GO:0008150,GO:0008219,GO:0009626,GO:0009987,GO:0012501,GO:0012505,GO:0016020,GO:0017076,GO:0019897,GO:0019898,GO:0023052,GO:0030554,GO:0032553,GO:0032555,GO:0032559,GO:0033554,GO:0034050,GO:0035639,GO:0036094,GO:0043167,GO:0043168,GO:0043531,GO:…	ko:K13457
Mt0048_10131	Medtr2g073310		1.06	1.85	0.98	0.15	0.26	0.5	1.29667	0.303333	-2.0958	0.000357206	0.00958284	#N/A	#N/A	#N/A	#N/A	#N/A
Mt0006_00616	Medtr3g075260		5.35	6.71	4.33	3.23	1.92	2.65	5.46333	2.6	-1.0713	0.000367591	0.00983089	L	DNA polymerase III	-	GO:0000166,GO:0003674,GO:0003676,GO:0003677,GO:0003824,GO:0003887,GO:0005488,GO:0005524,GO:0005575,GO:0005622,GO:0005623,GO:0005634,GO:0005657,GO:0005663,GO:0005694,GO:0006139,GO:0006259,GO:0006260,GO:0006261,GO:0006281,GO:0006725,GO:0006807,GO:0006950,GO:0006974,GO:0008144,GO:0008150,GO:0008152,GO:0009058,GO:0009059,GO:0009360,GO:0009987,GO:0016740,GO:0016772,GO:0016779,GO:0017076,GO:0018130,GO:…	-
Mt0013_10245	Medtr3g031335	NCR133-TC36625	2.33	2.35	3.41	1.11	0.8	1.46	2.69667	1.12333	-1.2634	0.000368787	0.00984433	#N/A	#N/A	#N/A	#N/A	#N/A
Mt0030_00060	Medtr3g435480		0.27	0.4	0.49	1.23	1.35	0.83	0.386667	1.13667	1.5556	0.000368932	0.00984433	K	Cyclic dof factor	-	GO:0000003,GO:0003006,GO:0003674,GO:0003676,GO:0003677,GO:0003700,GO:0005488,GO:0005575,GO:0005622,GO:0005623,GO:0005634,GO:0006139,GO:0006351,GO:0006355,GO:0006725,GO:0006807,GO:0007275,GO:0008150,GO:0008152,GO:0009058,GO:0009059,GO:0009791,GO:0009889,GO:0009908,GO:0009987,GO:0010467,GO:0010468,GO:0010556,GO:0016070,GO:0018130,GO:0019219,GO:0019222,GO:0019438,GO:0022414,GO:0031323,GO:0031326,GO:…	ko:K16222
Mt0055_10060	Medtr2g039320		14.99	9.78	5.12	21.63	24.18	32.38	9.96333	26.0633	1.3873	0.000369394	0.00984921	#N/A	#N/A	#N/A	#N/A	#N/A
Mt0042_10258	Medtr8g445350		0.82	0.86	1.64	2	3.69	3.02	1.10667	2.90333	1.3915	0.000379008	0.010075	#N/A	#N/A	#N/A	#N/A	#N/A
Mt0019_10443	Medtr2g089650		0.82	1.22	1.48	8.65	1.19	6.07	1.17333	5.30333	2.1763	0.000379544	0.0100817	S	Transferase family	-	-	-
Mt0014_00126	Medtr4g035855		0.24	0.99	0.49	1.75	1.7	2.22	0.573333	1.89	1.7209	0.000392971	0.0103913	L	21 kDa protein-like	-	GO:0003674,GO:0004857,GO:0005575,GO:0005576,GO:0005618,GO:0005623,GO:0008150,GO:0009505,GO:0030234,GO:0030312,GO:0043086,GO:0044092,GO:0044464,GO:0046910,GO:0048046,GO:0050789,GO:0050790,GO:0050793,GO:0051239,GO:0065007,GO:0065009,GO:0071944,GO:0098772,GO:2000026,GO:2000280	-
Mt0118_10030	Medtr0038s0080		1.1	0.53	0.69	2.49	1.92	1.56	0.773333	1.99	1.3636	0.00040016	0.0105735	O	Toll - interleukin 1 - resistance	-	-	-
Mt0042_00224	Medtr6g074865	NCR	1.68	1.52	2.3	0.43	0.42	0.93	1.83333	0.593333	-1.6276	0.000402179	0.0106109	#N/A	#N/A	#N/A	#N/A	#N/A
Mt0002_00850	Medtr1g027040		2.5	2.44	4.3	10.86	4.62	6.77	3.08	7.41667	1.2678	0.000404734	0.0106703	T	receptor-like protein kinase	-	GO:0000166,GO:0003674,GO:0003824,GO:0004672,GO:0004674,GO:0005488,GO:0005524,GO:0005575,GO:0006464,GO:0006468,GO:0006793,GO:0006796,GO:0006807,GO:0008144,GO:0008150,GO:0008152,GO:0009987,GO:0016020,GO:0016021,GO:0016301,GO:0016310,GO:0016740,GO:0016772,GO:0016773,GO:0017076,GO:0019538,GO:0030554,GO:0031224,GO:0032553,GO:0032555,GO:0032559,GO:0035639,GO:0036094,GO:0036211,GO:0043167,GO:0043168,GO:…	-
Mt0029_00082	Medtr1g110230		0.21	0.3	0.62	1.66	1.09	1.03	0.376667	1.26	1.7421	0.000408727	0.0107595	T	Wall-associated receptor kinase C-terminal	-	-	-
Mt0020_10251	Medtr6g007480		0.93	1.95	1.38	3.51	2.63	2.92	1.42	3.02	1.0887	0.000410141	0.0107886	G	beta-galactosidase	-	-	ko:K10761,ko:K14319,ko:K14966
Mt0042_10149	Medtr6g073013		0.07	0.07	0.03	0.92	0.22	0.53	0.0566667	0.556667	3.2962	0.000417557	0.0109673	S	Zinc-finger homeodomain protein	-	GO:0003674,GO:0003676,GO:0003677,GO:0005488,GO:0005575,GO:0005622,GO:0005623,GO:0005634,GO:0006139,GO:0006351,GO:0006355,GO:0006725,GO:0006807,GO:0008150,GO:0008152,GO:0009058,GO:0009059,GO:0009889,GO:0009987,GO:0010467,GO:0010468,GO:0010556,GO:0016070,GO:0018130,GO:0019219,GO:0019222,GO:0019438,GO:0031323,GO:0031326,GO:0032774,GO:0034641,GO:0034645,GO:0034654,GO:0043167,GO:0043169,GO:0043170,GO:…	-
Mt0027_10089	Medtr5g007760		105.12	71.53	46.19	120.4	193.82	215.6	74.28	176.607	1.2495	0.000423309	0.0111019	H	Belongs to the chalcone stilbene synthases family	CHS3	GO:0003674,GO:0003824,GO:0008150,GO:0008152,GO:0009058,GO:0009812,GO:0009813,GO:0016210,GO:0016740,GO:0016746,GO:0016747,GO:0071704,GO:1901576	ko:K00660
Mt0001_01367	Medtr4g103910		0.72	1.35	1.05	0.37	0.29	0.27	1.04	0.31	-1.7462	0.000425703	0.0111481	S	Viral movement protein (MP)	-	-	-
Mt0002_11198	Medtr1g035730		2.68	1.55	1.74	4.89	3.4	3.98	1.99	4.09	1.0393	0.000426207	0.0111529	GMW	Xyloglucan galactosyltransferase	-	GO:0000139,GO:0000271,GO:0000902,GO:0001101,GO:0003674,GO:0003824,GO:0005575,GO:0005622,GO:0005623,GO:0005737,GO:0005768,GO:0005794,GO:0005795,GO:0005802,GO:0005975,GO:0005976,GO:0005996,GO:0006004,GO:0006073,GO:0006464,GO:0006486,GO:0006807,GO:0007154,GO:0007165,GO:0008150,GO:0008152,GO:0009058,GO:0009059,GO:0009100,GO:0009101,GO:0009250,GO:0009653,GO:0009719,GO:0009725,GO:0009751,GO:0009826,GO:…	ko:K20888
Mt0015_10559	Medtr8g046210		4.32	2.94	5.78	18.37	6.54	9.55	4.34667	11.4867	1.402	0.000436798	0.0114131	Q	Belongs to the cytochrome P450 family	-	GO:0003674,GO:0003824,GO:0004497,GO:0005488,GO:0005506,GO:0005575,GO:0008150,GO:0008152,GO:0009058,GO:0016020,GO:0016021,GO:0016491,GO:0016705,GO:0016709,GO:0019748,GO:0020037,GO:0031224,GO:0043167,GO:0043169,GO:0044425,GO:0044550,GO:0046872,GO:0046906,GO:0046914,GO:0048037,GO:0055114,GO:0097159,GO:1901363	ko:K20556
Mt0056_00085	Medtr2g044100		2.2	1.82	1.77	0.86	0.51	0.96	1.93	0.776667	-1.3132	0.000437292	0.0114176	S	Belongs to the 'GDSL' lipolytic enzyme family	-	-	-
Mt0024_00280	Medtr6g088770		0.65	0.46	0.56	1.32	1.22	1.43	0.556667	1.32333	1.2493	0.000437827	0.0114231	T	Belongs to the protein kinase superfamily. Ser Thr protein kinase family	-	GO:0000166,GO:0003674,GO:0003824,GO:0004672,GO:0004674,GO:0005488,GO:0005524,GO:0005575,GO:0005623,GO:0005886,GO:0006464,GO:0006468,GO:0006793,GO:0006796,GO:0006807,GO:0007275,GO:0008144,GO:0008150,GO:0008152,GO:0009653,GO:0009791,GO:0009987,GO:0010015,GO:0010101,GO:0010102,GO:0010468,GO:0016020,GO:0016021,GO:0016301,GO:0016310,GO:0016740,GO:0016772,GO:0016773,GO:0017076,GO:0019222,GO:0019538,GO:…	ko:K00924
Mt0011_10203	Medtr7g090570		11.36	16.29	13.98	6.98	4.87	8.92	13.8767	6.92333	-1.0031	0.000438432	0.0114304	#N/A	#N/A	#N/A	#N/A	#N/A
Mt0063_10012	Medtr5g075380		0.03	0.03	0	0.68	0.26	0.4	0.02	0.446667	4.4811	0.000448152	0.0116486	K	Agamous-like MADS-box protein	-	GO:0000003,GO:0000976,GO:0000981,GO:0000982,GO:0000987,GO:0001067,GO:0003006,GO:0003674,GO:0003676,GO:0003677,GO:0003690,GO:0003700,GO:0005488,GO:0005515,GO:0005575,GO:0005622,GO:0005623,GO:0005634,GO:0006139,GO:0006351,GO:0006355,GO:0006357,GO:0006725,GO:0006807,GO:0007275,GO:0008150,GO:0008152,GO:0009058,GO:0009059,GO:0009790,GO:0009791,GO:0009793,GO:0009889,GO:0009891,GO:0009893,GO:0009987,GO:…	ko:K09260
Mt0018_00472	Medtr2g435320	NCR	4.12	4.06	3.87	1.48	0.99	2.42	4.01667	1.63	-1.3011	0.000449779	0.0116744	#N/A	#N/A	#N/A	#N/A	#N/A
Mt0016_00330	Medtr2g098590		0.14	0.07	0.16	1.02	0.55	0.43	0.123333	0.666667	2.4344	0.000456289	0.0117999	#N/A	#N/A	#N/A	#N/A	#N/A
Mt0003_10049	Medtr4g051622		2.44	2.38	9.32	17.85	23.67	9.92	4.71333	17.1467	1.8631	0.00045818	0.0118401	C	Apoptosis-inducing factor	-	GO:0003674,GO:0003824,GO:0008150,GO:0008152,GO:0016491,GO:0055114	-
Mt0007_00297	Medtr3g093830	WRKY70-like	17.05	21.01	33.68	95.69	36.85	44.78	23.9133	59.1067	1.3055	0.000467051	0.012034	K	WRKY transcription factor	WRKY54	GO:0001101,GO:0002218,GO:0002252,GO:0002253,GO:0002376,GO:0002682,GO:0002684,GO:0003674,GO:0003676,GO:0003677,GO:0003700,GO:0005488,GO:0005575,GO:0005622,GO:0005623,GO:0005634,GO:0006139,GO:0006351,GO:0006355,GO:0006725,GO:0006807,GO:0006950,GO:0006952,GO:0006955,GO:0007154,GO:0007165,GO:0008150,GO:0008152,GO:0009058,GO:0009059,GO:0009605,GO:0009607,GO:0009617,GO:0009620,GO:0009627,GO:0009682,GO:…	-
Mt0063_10053	Medtr5g076110		4.01	5.25	5.32	2.06	1.25	2.89	4.86	2.06667	-1.2337	0.000469852	0.0120862	#N/A	#N/A	#N/A	#N/A	#N/A
Mt0006_00180	Medtr1g037600		0	0	0	0.15	1.22	0.07	0.001	0.48	8.9069	0.000470107	0.0120862	D	Belongs to the helicase family	-	-	ko:K15255
Mt0278_00004	Medtr0003s0170		0	0	0	0.34	0.38	0.1	0.001	0.273333	8.0945	0.000485819	0.0124357	T	Belongs to the disease resistance NB-LRR family	-	-	ko:K19613
Mt0008_00956	Medtr5g073620		0.24	0.43	0.53	2.34	0.67	1.63	0.4	1.54667	1.9511	0.000488071	0.0124843	U	Exocyst subunit exo70 family protein	-	-	ko:K07195
Mt0008_10393	Medtr5g062370		1.03	0.63	0.43	1.82	1.76	1.79	0.696667	1.79	1.3614	0.000491894	0.0125638	G	Encoded by	-	GO:0003674,GO:0003824,GO:0004553,GO:0005575,GO:0005576,GO:0005618,GO:0005622,GO:0005623,GO:0005737,GO:0005911,GO:0005975,GO:0008150,GO:0008152,GO:0009505,GO:0009506,GO:0009507,GO:0009536,GO:0016787,GO:0016798,GO:0030054,GO:0030312,GO:0043226,GO:0043227,GO:0043229,GO:0043231,GO:0044238,GO:0044424,GO:0044444,GO:0044464,GO:0048046,GO:0055044,GO:0071704,GO:0071944	ko:K15920
Mt0004_00083	Medtr2g034295		1.68	1.55	1.18	0.62	0.61	0.5	1.47	0.576667	-1.35	0.000494218	0.0125958	S	nuclease activity	-	-	-
Mt0016_00154	Medtr2g102355		34	22.27	32.3	54.8	104.48	43.82	29.5233	67.7	1.1973	0.000504971	0.0128512	S	F-box kelch-repeat protein	-	GO:0000151,GO:0003674,GO:0005488,GO:0005515,GO:0005575,GO:0005622,GO:0005623,GO:0005737,GO:0005829,GO:0006508,GO:0006511,GO:0006807,GO:0008150,GO:0008152,GO:0009056,GO:0009057,GO:0009966,GO:0009968,GO:0009987,GO:0010498,GO:0010646,GO:0010648,GO:0019005,GO:0019222,GO:0019538,GO:0019899,GO:0019941,GO:0023051,GO:0023057,GO:0030162,GO:0030163,GO:0031323,GO:0031461,GO:0031625,GO:0032991,GO:0043161,GO:…	-
Mt0455_10001	Medtr4g018680	NCR	2.57	2.71	3.45	0.89	0.48	1.56	2.91	0.976667	-1.5751	0.000513346	0.0130549	#N/A	#N/A	#N/A	#N/A	#N/A
Mt0023_10278	Medtr2g010590		0	0.4	0.23	5.14	0.96	0.8	0.21	2.3	3.4532	0.000525772	0.013342	L	Belongs to the CRISP family	-	GO:0005575,GO:0005576,GO:0006950,GO:0006952,GO:0008150,GO:0009607,GO:0050896	ko:K13449
Mt0008_10153	Medtr5g055355		0.03	0	0	0.28	0.26	0.5	0.01	0.346667	5.1155	0.000528305	0.0133967	#N/A	#N/A	#N/A	#N/A	#N/A
Mt0001_11892	Medtr4g093040		1.2	1.39	1.44	3.54	1.89	2.92	1.34333	2.78333	1.051	0.000538616	0.0136441	T	L-type lectin-domain containing receptor kinase IX.1-like	-	-	-
Mt0007_00332	Medtr3g094730		6.42	5.98	5.51	2.46	1.67	3.75	5.97	2.62667	-1.1845	0.000538839	0.0136441	#N/A	#N/A	#N/A	#N/A	#N/A
Mt0015_10081	Medtr8g006790		4.01	9.65	11.19	62.67	8.11	35.2	8.28333	35.3267	2.0925	0.000557266	0.0140501	P	Plasma membrane ATPase	-	GO:0000166,GO:0003674,GO:0003824,GO:0005215,GO:0005488,GO:0005524,GO:0005575,GO:0005623,GO:0005886,GO:0006810,GO:0006811,GO:0006812,GO:0008144,GO:0008150,GO:0008324,GO:0008553,GO:0015075,GO:0015077,GO:0015078,GO:0015318,GO:0015399,GO:0015405,GO:0015662,GO:0015672,GO:0016020,GO:0016021,GO:0016462,GO:0016787,GO:0016817,GO:0016818,GO:0016887,GO:0017076,GO:0017111,GO:0019829,GO:0022804,GO:0022853,GO:…	ko:K01535
Mt0037_10045	Medtr5g029400		11.15	8.29	12.87	3.02	5.74	5.47	10.77	4.74333	-1.183	0.000563389	0.0141639	#N/A	#N/A	#N/A	#N/A	#N/A
Mt0023_10038	Medtr2g015760		3.09	2.58	1.77	1.05	0.93	1.16	2.48	1.04667	-1.2445	0.000565711	0.0142021	S	F-box kelch-repeat protein	-	-	-
Mt0015_10216	Medtr8g009980		6.86	4.89	4.6	7.29	16.42	13.9	5.45	12.5367	1.2018	0.000566907	0.0142219	S	2-alkenal reductase (NADP( )-dependent)-like	-	-	-
Mt0085_00052	Medtr7g028710	WRKY75	0.75	0.99	3.18	6.58	5.64	4.05	1.64	5.42333	1.7255	0.000571864	0.0143199	K	WRKY transcription factor	-	GO:0000122,GO:0000976,GO:0000977,GO:0000978,GO:0000987,GO:0001012,GO:0001067,GO:0003674,GO:0003676,GO:0003677,GO:0003690,GO:0003700,GO:0005488,GO:0005575,GO:0005622,GO:0005623,GO:0005634,GO:0006139,GO:0006351,GO:0006355,GO:0006357,GO:0006725,GO:0006807,GO:0006950,GO:0007275,GO:0008150,GO:0008152,GO:0009058,GO:0009059,GO:0009653,GO:0009791,GO:0009888,GO:0009889,GO:0009890,GO:0009892,GO:0009987,GO:…	-
Mt0009_10663	Medtr8g098975		0.17	0.23	0.1	0.52	1.22	0.63	0.166667	0.79	2.2449	0.000582441	0.0145392	#N/A	#N/A	#N/A	#N/A	#N/A
Mt0018_10080	Medtr2g026575		1.44	1.95	1.84	0.95	0.38	0.6	1.74333	0.643333	-1.4382	0.000596333	0.0148334	S	Encoded by	-	-	-
Mt0033_00192	Medtr6g021860		0.07	0.07	0.16	1.35	0.45	0.36	0.1	0.72	2.848	0.000607189	0.0150715	-	-	-	-	-
Mt0056_10127	Medtr2g042610		0	0.03	0.1	1.38	0.45	0.2	0.0433333	0.676667	3.9649	0.00060845	0.0150921	G	beta-galactosidase	BGAL7	GO:0003674,GO:0003824,GO:0004553,GO:0004565,GO:0005488,GO:0005575,GO:0005576,GO:0005618,GO:0005622,GO:0005623,GO:0005737,GO:0005773,GO:0005975,GO:0008150,GO:0008152,GO:0015925,GO:0016787,GO:0016798,GO:0030246,GO:0030312,GO:0043226,GO:0043227,GO:0043229,GO:0043231,GO:0044238,GO:0044424,GO:0044444,GO:0044464,GO:0048046,GO:0071704,GO:0071944	-
Mt0032_10250	Medtr6g048620		0.17	0.1	0.07	0.58	0.67	0.43	0.113333	0.56	2.3049	0.000625653	0.0154319	-	-	-	-	-
Mt0048_00043	Medtr2g076610		109.54	90.89	216.52	322.02	344.09	224.68	138.983	296.93	1.0952	0.000630389	0.0155378	S	Epidermis-specific secreted glycoprotein	-	GO:0003674,GO:0005488,GO:0005575,GO:0005576,GO:0005618,GO:0005622,GO:0005623,GO:0005737,GO:0005773,GO:0005774,GO:0005794,GO:0005829,GO:0006810,GO:0006833,GO:0008150,GO:0009505,GO:0012505,GO:0016020,GO:0030246,GO:0030312,GO:0031090,GO:0042044,GO:0043226,GO:0043227,GO:0043229,GO:0043231,GO:0044422,GO:0044424,GO:0044437,GO:0044444,GO:0044446,GO:0044464,GO:0048046,GO:0051179,GO:0051234,GO:0071944,GO:…	-
Mt0019_00380	Medtr2g088980		3.95	2.11	9.49	26.71	13.5	11.78	5.18333	17.33	1.7413	0.000639159	0.015721	S	Cysteine-rich repeat secretory protein	-	GO:0001101,GO:0005575,GO:0005576,GO:0005618,GO:0005622,GO:0005623,GO:0005737,GO:0005773,GO:0008150,GO:0009719,GO:0009725,GO:0009737,GO:0010033,GO:0030312,GO:0033993,GO:0042221,GO:0043226,GO:0043227,GO:0043229,GO:0043231,GO:0044424,GO:0044444,GO:0044464,GO:0050896,GO:0071944,GO:0097305,GO:1901700	-
Mt0004_10951	Medtr1g069940		1.58	1.22	0.79	2.28	3.37	2.65	1.19667	2.76667	1.2091	0.000645485	0.0158402	K	Ethylene-responsive transcription factor 1B-like	-	-	ko:K14516
Mt0060_10060	Medtr3g047190		1.06	1.06	0.85	5.63	1.25	3.22	0.99	3.36667	1.7658	0.000651592	0.0159488	S	VQ motif	-	-	-
Mt0001_11414	Medtr4g101600		0	0	0	0.31	0.13	0.27	0.001	0.236667	7.8867	0.00066364	0.0161875	G	Removes the phosphate from trehalose 6-phosphate to produce free trehalose	-	GO:0000287,GO:0003674,GO:0003824,GO:0004805,GO:0005488,GO:0005575,GO:0005622,GO:0005623,GO:0005737,GO:0005829,GO:0005886,GO:0005975,GO:0005984,GO:0005991,GO:0005992,GO:0006793,GO:0006796,GO:0008150,GO:0008152,GO:0009058,GO:0009311,GO:0009312,GO:0009987,GO:0016020,GO:0016051,GO:0016311,GO:0016787,GO:0016788,GO:0016791,GO:0019203,GO:0034637,GO:0040007,GO:0042578,GO:0043167,GO:0043169,GO:0044237,GO:…	ko:K01087
Mt0168_10016	Medtr6g071400		0.96	3.14	7.32	31.51	7.92	13.6	3.80667	17.6767	2.2152	0.000670061	0.0163215	S	YLS9-like	-	-	-
Mt0068_00152	Medtr3g116450		0.07	0.13	0.13	0.34	0.8	0.66	0.11	0.6	2.4475	0.000674529	0.016419	KLT	protein serine/threonine kinase activity	-	GO:0000166,GO:0003674,GO:0003824,GO:0004672,GO:0004674,GO:0004675,GO:0004888,GO:0005488,GO:0005524,GO:0005575,GO:0005623,GO:0005886,GO:0006464,GO:0006468,GO:0006793,GO:0006796,GO:0006807,GO:0007154,GO:0007165,GO:0007166,GO:0007167,GO:0007178,GO:0008144,GO:0008150,GO:0008152,GO:0009987,GO:0016020,GO:0016021,GO:0016301,GO:0016310,GO:0016740,GO:0016772,GO:0016773,GO:0017076,GO:0019199,GO:0019538,GO:…	ko:K04730,ko:K04733,ko:K11649
Mt0041_00028	Medtr6g016470		13	8.89	5.51	16.52	26.81	19.51	9.13333	20.9467	1.1975	0.000693235	0.0167931	P	calcium-transporting ATPase 13, plasma	-	GO:0000166,GO:0003674,GO:0003824,GO:0005215,GO:0005388,GO:0005488,GO:0005515,GO:0005516,GO:0005524,GO:0005575,GO:0005622,GO:0005623,GO:0005886,GO:0005887,GO:0006810,GO:0006811,GO:0006812,GO:0006816,GO:0008144,GO:0008150,GO:0008324,GO:0015075,GO:0015085,GO:0015318,GO:0015399,GO:0015405,GO:0015662,GO:0016020,GO:0016021,GO:0016462,GO:0016787,GO:0016817,GO:0016818,GO:0016887,GO:0017076,GO:0017111,GO:…	ko:K01537
Mt0034_00019	Medtr8g469980		0.79	0.5	0.92	5.78	0.8	3.35	0.736667	3.31	2.1677	0.000696071	0.0168502	S	zinc-binding in reverse transcriptase	-	-	-
Mt0038_00175	Medtr8g095350		4.67	4.72	3.58	2.15	1.6	2.65	4.32333	2.13333	-1.019	0.000700269	0.0169053	#N/A	#N/A	#N/A	#N/A	#N/A
Mt0037_10190	Medtr8g104770		1.89	2.54	2.33	0.98	1.25	1.03	2.25333	1.08667	-1.0522	0.000709571	0.0170629	S	Domain of unknown function (DUF4283)	-	-	-
Mt0154_10008	Medtr6g045097		14.62	14.44	25.11	3.32	9.94	5.64	18.0567	6.3	-1.5191	0.000714478	0.0171401	#N/A	#N/A	#N/A	#N/A	#N/A
Mt0046_10025	Medtr8g031120		0.31	1.19	0.26	4.49	1.44	2.26	0.586667	2.73	2.2183	0.000717924	0.0172018	S	Ripening-related protein	-	-	-
Mt0003_00975	Medtr4g073230		2.02	2.02	3.35	9.45	3.78	4.81	2.46333	6.01333	1.2876	0.000734795	0.0175583	T	receptor-like protein kinase	-	GO:0000166,GO:0003674,GO:0003824,GO:0004672,GO:0004674,GO:0005488,GO:0005524,GO:0005575,GO:0006464,GO:0006468,GO:0006793,GO:0006796,GO:0006807,GO:0008144,GO:0008150,GO:0008152,GO:0009987,GO:0016020,GO:0016021,GO:0016301,GO:0016310,GO:0016740,GO:0016772,GO:0016773,GO:0017076,GO:0019538,GO:0030554,GO:0031224,GO:0032553,GO:0032555,GO:0032559,GO:0035639,GO:0036094,GO:0036211,GO:0043167,GO:0043168,GO:…	-
Mt0008_10236	Medtr5g057910	NCR	8.92	6.57	13.95	4.52	3.43	5.27	9.81333	4.40667	-1.1551	0.000764036	0.018183	#N/A	#N/A	#N/A	#N/A	#N/A
Mt0026_00472	Medtr7g077000		0	0.03	0.23	3.57	0.13	1.16	0.0866667	1.62	4.2244	0.000764696	0.0181864	S	Ripening-related protein	-	-	-
Mt0007_10735	Medtr5g021020		1.96	1.29	0.85	4.03	2.31	3.95	1.36667	3.43	1.3275	0.000768634	0.0182431	O	mitochondrial chaperone	-	-	ko:K08900
Mt0026_00058	Medtr7g068110		2.81	2.38	6.89	12.8	14.75	6.47	4.02667	11.34	1.4938	0.000779705	0.0184925	#N/A	#N/A	#N/A	#N/A	#N/A
Mt0021_10359	Medtr7g012860		1.1	0.83	0.69	3.23	1.28	2.52	0.873333	2.34333	1.424	0.000780189	0.0184925	Q	Belongs to the cytochrome P450 family	CYP83A1	GO:0000162,GO:0002376,GO:0003674,GO:0003824,GO:0004497,GO:0005488,GO:0005506,GO:0005575,GO:0005622,GO:0005623,GO:0005737,GO:0005739,GO:0005783,GO:0005789,GO:0005886,GO:0006082,GO:0006520,GO:0006568,GO:0006576,GO:0006586,GO:0006725,GO:0006790,GO:0006807,GO:0006950,GO:0006952,GO:0006955,GO:0007275,GO:0008150,GO:0008152,GO:0008652,GO:0009058,GO:0009072,GO:0009073,GO:0009308,GO:0009309,GO:0009314,GO:…	ko:K00512,ko:K11818,ko:K12156
Mt0012_10321	Medtr5g040940		0.14	1.82	3.71	46.98	9.49	24.91	1.89	27.1267	3.8433	0.000792875	0.0187218	A	Belongs to the RNase T2 family	-	GO:0003674,GO:0003676,GO:0003723,GO:0003824,GO:0004518,GO:0004519,GO:0004521,GO:0004540,GO:0005488,GO:0005575,GO:0005576,GO:0005615,GO:0005618,GO:0005623,GO:0005886,GO:0006139,GO:0006725,GO:0006807,GO:0006950,GO:0007154,GO:0008150,GO:0008152,GO:0009058,GO:0009267,GO:0009605,GO:0009611,GO:0009718,GO:0009812,GO:0009813,GO:0009987,GO:0009991,GO:0016020,GO:0016036,GO:0016070,GO:0016787,GO:0016788,GO:…	ko:K01166
Mt0091_00055	Medtr4g036715		0	0	0	0.09	0.42	0.27	0.001	0.26	8.0224	0.000793051	0.0187218	#N/A	#N/A	#N/A	#N/A	#N/A
Mt0070_10061	Medtr0115s0040		0.48	0.76	0.26	0.03	0.1	0.03	0.5	0.0533333	-3.2288	0.000812906	0.0191008	#N/A	#N/A	#N/A	#N/A	#N/A
Mt0006_20114	Medtr3g064745		1.89	1.69	2.69	0.74	0.38	1.06	2.09	0.726667	-1.5241	0.000814794	0.0191325	#N/A	#N/A	#N/A	#N/A	#N/A
Mt0019_10188	Medtr2g083930		0	0.03	0	0.37	0.1	0.83	0.01	0.433333	5.4374	0.000817321	0.019156	O	Belongs to the peptidase C1 family	-	-	ko:K01365
Mt0022_00209	Medtr7g056450		4.05	3.57	7.06	10.55	11.87	7.27	4.89333	9.89667	1.0161	0.000819658	0.0191955	T	G-type lectin S-receptor-like Serine	-	-	ko:K04733
Mt0086_10008	Medtr7g062950		1.75	1.82	3.41	6.12	5.45	3.52	2.32667	5.03	1.1123	0.000827151	0.0193301	T	L-type lectin-domain containing receptor kinase	-	GO:0000166,GO:0001101,GO:0003674,GO:0003824,GO:0004672,GO:0004674,GO:0005488,GO:0005524,GO:0005575,GO:0005623,GO:0005886,GO:0006464,GO:0006468,GO:0006793,GO:0006796,GO:0006807,GO:0006950,GO:0006952,GO:0007275,GO:0008144,GO:0008150,GO:0008152,GO:0009555,GO:0009605,GO:0009607,GO:0009617,GO:0009719,GO:0009725,GO:0009751,GO:0009987,GO:0010033,GO:0014070,GO:0016020,GO:0016021,GO:0016301,GO:0016310,GO:…	-
Mt0002_10417	Medtr1g017570		0.72	0.86	0.79	1.94	1.28	1.76	0.79	1.66	1.0713	0.000827603	0.0193301	K	Ocs element-binding factor 1-like	-	GO:0000003,GO:0001101,GO:0003006,GO:0003674,GO:0003676,GO:0003677,GO:0003700,GO:0005488,GO:0005575,GO:0005622,GO:0005623,GO:0005634,GO:0006139,GO:0006351,GO:0006355,GO:0006725,GO:0006807,GO:0006950,GO:0006970,GO:0007154,GO:0007165,GO:0007275,GO:0008150,GO:0008152,GO:0009058,GO:0009059,GO:0009414,GO:0009415,GO:0009628,GO:0009651,GO:0009719,GO:0009725,GO:0009737,GO:0009738,GO:0009739,GO:0009743,GO:…	-
Mt0001_00265	Medtr4g129630		2.02	1.65	0.76	3.23	3.27	5.21	1.47667	3.90333	1.4024	0.000831275	0.019403	S	Belongs to the sterol desaturase family	CER3	GO:0000003,GO:0003006,GO:0003674,GO:0003824,GO:0005488,GO:0005506,GO:0005575,GO:0005622,GO:0005623,GO:0005737,GO:0005783,GO:0005789,GO:0005886,GO:0006629,GO:0006723,GO:0007275,GO:0007276,GO:0008150,GO:0008152,GO:0008610,GO:0009058,GO:0009555,GO:0009987,GO:0010025,GO:0010166,GO:0012505,GO:0016020,GO:0016021,GO:0016491,GO:0019953,GO:0022412,GO:0022414,GO:0030154,GO:0031224,GO:0031984,GO:0032501,GO:…	-
Mt0027_10155	Medtr1g096370		0.17	0.17	0.2	0.55	0.55	1.03	0.18	0.71	1.9798	0.000833608	0.0194317	S	Gibberellin regulated protein	-	GO:0001101,GO:0005575,GO:0005576,GO:0007154,GO:0007165,GO:0008150,GO:0009719,GO:0009725,GO:0009739,GO:0009740,GO:0009755,GO:0009987,GO:0010033,GO:0010476,GO:0023052,GO:0032870,GO:0033993,GO:0042221,GO:0050789,GO:0050794,GO:0050896,GO:0051716,GO:0065007,GO:0070887,GO:0071229,GO:0071310,GO:0071370,GO:0071396,GO:0071495,GO:1901700,GO:1901701	-
Mt0041_00236	Medtr4g091680		0.58	0.2	0.39	1.05	1.44	1.09	0.39	1.19333	1.6135	0.000838687	0.0195243	T	G-type lectin S-receptor-like serine threonine-protein kinase	-	GO:0000003,GO:0000166,GO:0003674,GO:0003824,GO:0004672,GO:0004674,GO:0005488,GO:0005515,GO:0005516,GO:0005524,GO:0005575,GO:0005623,GO:0005886,GO:0006464,GO:0006468,GO:0006793,GO:0006796,GO:0006807,GO:0007154,GO:0008037,GO:0008144,GO:0008150,GO:0008152,GO:0009856,GO:0009875,GO:0009987,GO:0016020,GO:0016021,GO:0016301,GO:0016310,GO:0016740,GO:0016772,GO:0016773,GO:0017076,GO:0019538,GO:0022414,GO:…	-
Mt0018_00366	Medtr2g033170		2.5	1.26	2.63	4.49	8.56	3.75	2.13	5.6	1.3946	0.000847621	0.0196817	K	Transcription factor	MYB108	GO:0000981,GO:0000988,GO:0000989,GO:0001067,GO:0001076,GO:0001101,GO:0001134,GO:0001135,GO:0003674,GO:0003676,GO:0003677,GO:0003700,GO:0005488,GO:0005575,GO:0005622,GO:0005623,GO:0005634,GO:0006139,GO:0006351,GO:0006355,GO:0006357,GO:0006725,GO:0006807,GO:0006950,GO:0006952,GO:0006970,GO:0008150,GO:0008152,GO:0009058,GO:0009059,GO:0009605,GO:0009607,GO:0009620,GO:0009628,GO:0009651,GO:0009719,GO:…	ko:K09422
Mt0045_10204	Medtr4g014220		0.17	0.63	0.36	1.45	0.93	1.33	0.386667	1.23667	1.6773	0.000847685	0.0196817	S	NB-ARC domain	-	-	-
Mt0023_00047	Medtr2g015310		0.69	0.99	0.69	1.97	1.73	1.36	0.79	1.68667	1.0943	0.000877064	0.0202836	EPT	Glutamate-gated receptor that probably acts as non- selective cation channel	-	GO:0001101,GO:0003674,GO:0004888,GO:0004970,GO:0005215,GO:0005216,GO:0005230,GO:0005261,GO:0005262,GO:0005575,GO:0005622,GO:0005623,GO:0005737,GO:0005773,GO:0005886,GO:0006810,GO:0006811,GO:0006812,GO:0006816,GO:0007154,GO:0007165,GO:0007166,GO:0007215,GO:0008066,GO:0008150,GO:0008324,GO:0009719,GO:0009987,GO:0010033,GO:0010243,GO:0015075,GO:0015085,GO:0015267,GO:0015276,GO:0015318,GO:0016020,GO:…	ko:K05387
Mt0011_10653	Medtr7g081160		1.44	1.45	0.46	2.71	2.82	4.18	1.11667	3.23667	1.5353	0.000879578	0.0203284	O	E3 ubiquitin-protein ligase	-	-	ko:K16280
Mt0020_00390	Medtr8g479450		1.13	1.82	1.61	4.55	2.28	2.95	1.52	3.26	1.1008	0.000886406	0.020446	S	disease resistance	-	GO:0000166,GO:0003674,GO:0005488,GO:0005524,GO:0006950,GO:0006952,GO:0008144,GO:0008150,GO:0017076,GO:0030554,GO:0032553,GO:0032555,GO:0032559,GO:0035639,GO:0036094,GO:0043167,GO:0043168,GO:0043531,GO:0050896,GO:0097159,GO:0097367,GO:1901265,GO:1901363	ko:K19613
Mt0049_10158	Medtr3g052090		5.04	5.42	4.53	2.22	1.28	3.09	4.99667	2.19667	-1.1857	0.000895632	0.0206183	#N/A	#N/A	#N/A	#N/A	#N/A
Mt0006_00002	Medtr3g089125		57.71	51.15	61.39	28.21	13.56	34.87	56.75	25.5467	-1.1515	0.000900778	0.0207097	U	Mediates both low-affinity uptake and efflux of sugar across the membrane	-	GO:0003674,GO:0005215,GO:0005575,GO:0005622,GO:0005623,GO:0005737,GO:0005783,GO:0005789,GO:0005886,GO:0005887,GO:0006810,GO:0008150,GO:0008643,GO:0009987,GO:0012505,GO:0015144,GO:0016020,GO:0016021,GO:0016043,GO:0022607,GO:0022857,GO:0031224,GO:0031226,GO:0031984,GO:0034219,GO:0042175,GO:0043226,GO:0043227,GO:0043229,GO:0043231,GO:0043933,GO:0044085,GO:0044422,GO:0044424,GO:0044425,GO:0044432,GO:…	ko:K15382
Mt0040_00108	Medtr3g111610		0.62	0.23	0.66	1.54	1.48	1.16	0.503333	1.39333	1.469	0.000907219	0.020817	I	elongation of fatty acids protein	-	-	-
Mt0012_00616	Medtr5g034660		0.48	0.66	1.08	1.42	2.53	1.82	0.74	1.92333	1.378	0.000913911	0.0209433	V	Mitochondrial Rho GTPase	-	GO:0000003,GO:0000166,GO:0000902,GO:0000904,GO:0001882,GO:0001883,GO:0003006,GO:0003674,GO:0003824,GO:0003924,GO:0005488,GO:0005509,GO:0005525,GO:0005575,GO:0005622,GO:0005623,GO:0005737,GO:0005739,GO:0005740,GO:0005741,GO:0006810,GO:0006839,GO:0006915,GO:0006928,GO:0006996,GO:0007005,GO:0007006,GO:0007017,GO:0007018,GO:0007154,GO:0007165,GO:0007275,GO:0008150,GO:0008219,GO:0008637,GO:0009653,GO:…	ko:K07870
Mt0003_11345	Medtr4g081380		0.34	0.86	1.08	7.38	1.31	2.02	0.76	3.57	2.2319	0.000923795	0.0211285	O	Thioredoxin	-	GO:0003674,GO:0003756,GO:0003824,GO:0004791,GO:0005575,GO:0005622,GO:0005623,GO:0005737,GO:0005829,GO:0006662,GO:0006950,GO:0006979,GO:0008150,GO:0008152,GO:0009636,GO:0009987,GO:0015035,GO:0015036,GO:0016209,GO:0016491,GO:0016651,GO:0016667,GO:0016668,GO:0016671,GO:0016853,GO:0016860,GO:0016864,GO:0018904,GO:0019725,GO:0033554,GO:0034599,GO:0042221,GO:0042592,GO:0044281,GO:0044424,GO:0044444,GO:…	ko:K03671
Mt0014_00692	Medtr4g022290		0.34	0.5	1.84	0.12	0.16	0.07	0.893333	0.116667	-2.9368	0.000966889	0.0220387	G	Acetyltransferase	-	-	-
Mt0138_00031	Medtr6g463790		0.27	0.43	0.23	0	0	0.03	0.31	0.01	-4.9542	0.000967346	0.0220387	#N/A	#N/A	#N/A	#N/A	#N/A
Mt0006_11091	Medtr8g007665		0	0	0	0.09	0.29	0.33	0.001	0.236667	7.8867	0.000993685	0.0224789	#N/A	#N/A	#N/A	#N/A	#N/A
Mt0007_10255	Medtr5g096000		0.24	0.1	0.13	1.29	0.48	0.53	0.156667	0.766667	2.2909	0.00100946	0.0227919	U	Belongs to the major facilitator superfamily. Sugar transporter (TC 2.A.1.1) family	-	-	-
Mt0007_10856	Medtr3g105650		0.79	0.99	0.3	2.03	1.51	2.72	0.693333	2.08667	1.5896	0.00101196	0.0228336	S	Domain of unknown function	-	GO:0000323,GO:0001101,GO:0001508,GO:0002027,GO:0002376,GO:0003008,GO:0003012,GO:0003013,GO:0003015,GO:0003205,GO:0003230,GO:0003279,GO:0003283,GO:0003674,GO:0005198,GO:0005200,GO:0005488,GO:0005515,GO:0005575,GO:0005622,GO:0005623,GO:0005737,GO:0005739,GO:0005764,GO:0005768,GO:0005769,GO:0005773,GO:0005829,GO:0005856,GO:0005886,GO:0005911,GO:0006810,GO:0006811,GO:0006812,GO:0006816,GO:0006873,GO:…	-
Mt0068_00055	Medtr2g023010		1.89	1.75	2.1	5.57	3.17	2.82	1.91333	3.85333	1.01	0.00101811	0.0229551	-	-	-	-	-
Mt0011_00506	Medtr7g084800		0.62	0.93	0.62	0.12	0.26	0.17	0.723333	0.183333	-1.9802	0.00101935	0.0229561	G	Belongs to the glyceraldehyde-3-phosphate dehydrogenase family	-	GO:0000166,GO:0003674,GO:0003824,GO:0005488,GO:0005575,GO:0005622,GO:0005623,GO:0005737,GO:0005975,GO:0005996,GO:0006006,GO:0008150,GO:0008152,GO:0009058,GO:0009314,GO:0009416,GO:0009507,GO:0009536,GO:0009628,GO:0009987,GO:0015977,GO:0015979,GO:0016051,GO:0016491,GO:0016620,GO:0016903,GO:0019253,GO:0019318,GO:0019685,GO:0036094,GO:0043226,GO:0043227,GO:0043229,GO:0043231,GO:0043891,GO:0044237,GO:…	ko:K05298
Mt0003_11182	Medtr4g078090		0.51	0.76	0.72	9.23	0.99	1.39	0.663333	3.87	2.5445	0.0010233	0.0230157	Q	Belongs to the cytochrome P450 family	-	GO:0003674,GO:0003824,GO:0004497,GO:0005488,GO:0005506,GO:0005575,GO:0008150,GO:0008152,GO:0009058,GO:0016020,GO:0016021,GO:0016491,GO:0016705,GO:0016709,GO:0019748,GO:0020037,GO:0031224,GO:0043167,GO:0043169,GO:0044425,GO:0044550,GO:0046872,GO:0046906,GO:0046914,GO:0048037,GO:0055114,GO:0097159,GO:1901363	ko:K20556
Mt0046_10107	Medtr8g028225		2.09	2.15	1.44	1.05	0.45	0.66	1.89333	0.72	-1.3949	0.00102824	0.0231121	C	Belongs to the malate synthase family	MS	GO:0003674,GO:0003824,GO:0004474,GO:0005575,GO:0005622,GO:0005623,GO:0005737,GO:0005777,GO:0005975,GO:0006081,GO:0006082,GO:0006091,GO:0006097,GO:0006099,GO:0006101,GO:0008150,GO:0008152,GO:0009060,GO:0009514,GO:0009987,GO:0015980,GO:0016740,GO:0016746,GO:0016999,GO:0017144,GO:0019752,GO:0032787,GO:0042579,GO:0043226,GO:0043227,GO:0043229,GO:0043231,GO:0043436,GO:0044237,GO:0044238,GO:0044262,GO:…	ko:K01638
Mt0041_00236	Medtr4g091780		0.99	0.89	0.43	1.82	1.67	2.12	0.77	1.87	1.2801	0.00103812	0.0233045	T	G-type lectin S-receptor-like serine threonine-protein kinase	-	GO:0000003,GO:0000166,GO:0003674,GO:0003824,GO:0004672,GO:0004674,GO:0005488,GO:0005515,GO:0005516,GO:0005524,GO:0005575,GO:0005623,GO:0005886,GO:0006464,GO:0006468,GO:0006793,GO:0006796,GO:0006807,GO:0007154,GO:0008037,GO:0008144,GO:0008150,GO:0008152,GO:0009856,GO:0009875,GO:0009987,GO:0016020,GO:0016021,GO:0016301,GO:0016310,GO:0016740,GO:0016772,GO:0016773,GO:0017076,GO:0019538,GO:0022414,GO:…	-
Mt0003_00267	Medtr6g465210		2.54	2.15	2.43	0.86	0.48	1.36	2.37333	0.9	-1.3989	0.00104007	0.0233332	#N/A	#N/A	#N/A	#N/A	#N/A
Mt0020_00352	Medtr8g078240		1.37	1.19	0.89	5.45	1.6	2.92	1.15	3.32333	1.531	0.00105749	0.0236638	G	Belongs to the glycosyltransferase 8 family	-	GO:0000139,GO:0000271,GO:0003674,GO:0003824,GO:0005575,GO:0005622,GO:0005623,GO:0005737,GO:0005794,GO:0005975,GO:0005976,GO:0008150,GO:0008152,GO:0008194,GO:0009058,GO:0009059,GO:0009987,GO:0010393,GO:0012505,GO:0016020,GO:0016021,GO:0016043,GO:0016051,GO:0016740,GO:0016757,GO:0016758,GO:0017144,GO:0031090,GO:0031224,GO:0031984,GO:0043170,GO:0043226,GO:0043227,GO:0043229,GO:0043231,GO:0044237,GO:…	ko:K20893
Mt0002_00470	Medtr1g017990		0.93	0.63	1.71	2.89	3.05	2.06	1.09	2.66667	1.2907	0.00106135	0.023705	-	-	-	-	-
Mt0043_00205	Medtr3g029510		54.89	66.51	48.25	35.23	14.78	29.86	56.55	26.6233	-1.0868	0.00107027	0.0238478	#N/A	#N/A	#N/A	#N/A	#N/A
Mt0001_10499	Medtr4g124850		1.92	2.54	3.81	1.57	0.8	0.66	2.75667	1.01	-1.4486	0.00107045	0.0238478	-	-	-	-	-
Mt0043_00069	Medtr3g026050		0.03	0.03	0.26	0.8	0.51	0.7	0.106667	0.67	2.6511	0.00108213	0.0240929	K	transcription factor	-	GO:0003674,GO:0003676,GO:0003677,GO:0003700,GO:0005488,GO:0005575,GO:0005622,GO:0005623,GO:0005634,GO:0006139,GO:0006351,GO:0006355,GO:0006725,GO:0006807,GO:0007275,GO:0008150,GO:0008152,GO:0009058,GO:0009059,GO:0009653,GO:0009889,GO:0009965,GO:0009987,GO:0010016,GO:0010467,GO:0010468,GO:0010556,GO:0016070,GO:0018130,GO:0019219,GO:0019222,GO:0019438,GO:0030154,GO:0031323,GO:0031326,GO:0032501,GO:…	-
Mt0026_00464	Medtr7g076930		0	0.03	0	0.71	0.06	0.5	0.01	0.423333	5.4037	0.00108795	0.0241612	S	Ripening-related protein	-	-	-
Mt0077_10003	Medtr2g070310		2.54	2.74	0.85	19.29	1.73	10.55	2.04333	10.5233	2.3646	0.00112046	0.0248364	S	nicotianamine	-	GO:0003674,GO:0003824,GO:0006082,GO:0006576,GO:0006807,GO:0008150,GO:0008152,GO:0009058,GO:0009308,GO:0009309,GO:0009987,GO:0016053,GO:0016740,GO:0016765,GO:0017144,GO:0018130,GO:0019752,GO:0030410,GO:0030417,GO:0030418,GO:0034641,GO:0042401,GO:0043436,GO:0044106,GO:0044237,GO:0044249,GO:0044271,GO:0044281,GO:0044283,GO:0046394,GO:0046483,GO:0071704,GO:0072350,GO:0072351,GO:1901360,GO:1901362,GO:…	ko:K05953
Mt0073_10114	Medtr2g450040	CP450	11.29	13.05	24.69	38.8	36.43	23.62	16.3433	32.95	1.0116	0.00112661	0.0249413	Q	Cytochrome p450	-	GO:0003674,GO:0003824,GO:0004497,GO:0005488,GO:0005506,GO:0005575,GO:0008150,GO:0008152,GO:0009058,GO:0016020,GO:0016491,GO:0016705,GO:0016709,GO:0019748,GO:0020037,GO:0043167,GO:0043169,GO:0044550,GO:0046872,GO:0046906,GO:0046914,GO:0048037,GO:0055114,GO:0097159,GO:1901363	ko:K07408
Mt0096_00010	Medtr0008s0470		26.52	33.77	17.2	64.4	33.06	67.31	25.83	54.9233	1.0884	0.00115354	0.0254415	K	Encoded by	-	-	ko:K09422
Mt0001_11571	Medtr4g097420		0.51	0.83	0.79	5.63	0.71	2.92	0.71	3.08667	2.1202	0.00115529	0.0254641	#N/A	#N/A	#N/A	#N/A	#N/A
Mt0015_00151	Medtr8g008765		0.48	0.23	0.62	0.06	0.06	0.03	0.443333	0.05	-3.1484	0.00118295	0.0260085	G	Polygalacturonase	-	-	ko:K01184,ko:K01213
Mt0151_00029	Medtr6g472300		3.22	3.73	5.19	12.74	5.39	7.5	4.04667	8.54333	1.0781	0.00118368	0.0260085	O	Toll - interleukin 1 - resistance	-	-	-
Mt0022_10260	Medtr7g064070		0.34	0.63	0.62	1.23	1.38	1.13	0.53	1.24667	1.234	0.00119597	0.0262294	#N/A	#N/A	#N/A	#N/A	#N/A
Mt0026_00475	Medtr7g012340		0.24	0.1	0.23	2.34	0.26	1.06	0.19	1.22	2.6828	0.00122603	0.0267886	S	Ripening-related protein	-	-	-
Mt0045_00148	Medtr4g014790	NCR	13.35	10.08	14.05	5.78	4.23	8.43	12.4933	6.14667	-1.0233	0.00127655	0.0277548	#N/A	#N/A	#N/A	#N/A	#N/A
Mt0002_10958	Medtr5g082380		0	0	0	0.22	0.13	0.27	0.001	0.206667	7.6912	0.00128006	0.0278139	T	Belongs to the protein kinase superfamily. Ser Thr protein kinase family	-	-	-
Mt0003_11103	Medtr4g075750		7.14	5.78	4.73	18.74	6.54	16.02	5.88333	13.7667	1.2265	0.00130965	0.028265	E	Lysine histidine transporter-like	-	GO:0003333,GO:0003674,GO:0005215,GO:0005342,GO:0005575,GO:0005623,GO:0005886,GO:0006810,GO:0006811,GO:0006820,GO:0006865,GO:0008150,GO:0008509,GO:0008514,GO:0015075,GO:0015171,GO:0015318,GO:0015711,GO:0015849,GO:0016020,GO:0016021,GO:0022857,GO:0031224,GO:0034220,GO:0044425,GO:0044464,GO:0046942,GO:0046943,GO:0051179,GO:0051234,GO:0055085,GO:0071702,GO:0071705,GO:0071944,GO:0098656,GO:1903825,GO:…	-
Mt0005_10296	Medtr5g010640		5.32	4.86	22.75	129.53	37.04	46.54	10.9767	71.0367	2.6941	0.00131054	0.0282669	O	Thaumatin family	-	GO:0001906,GO:0005575,GO:0005576,GO:0006950,GO:0006952,GO:0008150,GO:0009605,GO:0009607,GO:0009620,GO:0031640,GO:0035821,GO:0043207,GO:0044364,GO:0044419,GO:0050832,GO:0050896,GO:0051704,GO:0051707,GO:0098542	-
Mt0011_00168	Medtr7g091510		0.21	0.1	0.1	0.46	0.51	0.8	0.136667	0.59	2.1101	0.00131181	0.028277	Q	Methyltransferase	-	GO:0003674,GO:0003824,GO:0005575,GO:0005622,GO:0005623,GO:0005737,GO:0008150,GO:0008152,GO:0008168,GO:0008757,GO:0016740,GO:0016741,GO:0032259,GO:0044424,GO:0044464	-
Mt0048_00070	Medtr2g075610		0	0.03	0.07	0.74	0.22	0.3	0.0333333	0.42	3.6554	0.00132355	0.0284778	K	WRKY transcription factor	-	GO:0001101,GO:0002218,GO:0002252,GO:0002253,GO:0002376,GO:0002682,GO:0002684,GO:0003674,GO:0003676,GO:0003677,GO:0003700,GO:0005488,GO:0005575,GO:0005622,GO:0005623,GO:0005634,GO:0006139,GO:0006351,GO:0006355,GO:0006725,GO:0006807,GO:0006950,GO:0006952,GO:0006955,GO:0007154,GO:0007165,GO:0008150,GO:0008152,GO:0009058,GO:0009059,GO:0009605,GO:0009607,GO:0009617,GO:0009620,GO:0009627,GO:0009682,GO:…	-
Mt0050_00206	Medtr1g054210		0.62	0.69	0.79	0.12	0.26	0.2	0.7	0.193333	-1.8563	0.00132812	0.0285586	O	RING-type zinc-finger	-	GO:0003674,GO:0003824,GO:0004842,GO:0005488,GO:0005515,GO:0005575,GO:0005622,GO:0005623,GO:0005737,GO:0005783,GO:0005789,GO:0006464,GO:0006508,GO:0006515,GO:0006807,GO:0006950,GO:0008150,GO:0008152,GO:0009056,GO:0009057,GO:0009987,GO:0010033,GO:0010243,GO:0010498,GO:0012505,GO:0016020,GO:0016021,GO:0016567,GO:0016740,GO:0019538,GO:0019787,GO:0019899,GO:0030163,GO:0031224,GO:0031984,GO:0032446,GO:…	ko:K10666
Mt0050_10177	Medtr1g053900		0.79	1.29	1.48	8.22	1.57	2.92	1.18667	4.23667	1.836	0.00138223	0.0295598	S	Cotton fibre expressed protein	-	-	-
Mt0012_10727	Medtr5g031840		0	0	0	0.18	0.16	0.23	0.001	0.19	7.5699	0.0014026	0.0299321	CG	Belongs to the UDP-glycosyltransferase family	-	-	ko:K21373
Mt0013_10215	Medtr3g466150		4.53	5.45	5.65	3.78	1.86	1.96	5.21	2.53333	-1.0402	0.00140304	0.0299321	-	-	-	-	-
Mt0093_00004	Medtr4g019720		0.62	0.99	0.92	1.51	3.08	1.66	0.843333	2.08333	1.3047	0.00145733	0.0309217	#N/A	#N/A	#N/A	#N/A	#N/A
Mt0012_10211	Medtr5g043780		0.65	0.79	0.76	1.35	1.76	1.39	0.733333	1.5	1.0324	0.00146359	0.0310358	S	Pentatricopeptide repeat-containing protein	-	-	-
Mt0101_00004	Medtr2g438720		36.54	44.9	37.98	112.76	41.34	89.57	39.8067	81.2233	1.0289	0.00146951	0.0311053	S	Ankyrin repeat-containing protein	-	-	-
Mt0073_10007	Medtr2g055690		1.96	1.78	2.27	1.17	0.42	0.8	2.00333	0.796667	-1.3304	0.0014783	0.031235	Q	LRR receptor-like serine threonine-protein kinase	-	GO:0005575,GO:0005623,GO:0005886,GO:0016020,GO:0016021,GO:0031224,GO:0044425,GO:0044464,GO:0071944	-
Mt0022_10073	Medtr7g059285		2.95	4.13	4.73	2.4	0.96	1.73	3.93667	1.69667	-1.2143	0.00147968	0.0312454	T	Belongs to the protein kinase superfamily. Ser Thr protein kinase family	-	GO:0000166,GO:0003674,GO:0003824,GO:0004672,GO:0004674,GO:0005488,GO:0005524,GO:0005575,GO:0006464,GO:0006468,GO:0006793,GO:0006796,GO:0006807,GO:0008144,GO:0008150,GO:0008152,GO:0009987,GO:0016020,GO:0016021,GO:0016301,GO:0016310,GO:0016740,GO:0016772,GO:0016773,GO:0017076,GO:0019538,GO:0030554,GO:0031224,GO:0032553,GO:0032555,GO:0032559,GO:0035639,GO:0036094,GO:0036211,GO:0043167,GO:0043168,GO:…	-
Mt0002_01345	Medtr1g038560		0.14	0.13	0.1	1.54	0.26	0.53	0.123333	0.776667	2.6547	0.0015004	0.0315883	S	WAT1-related protein	-	GO:0003674,GO:0005215,GO:0005575,GO:0005622,GO:0005623,GO:0005737,GO:0005886,GO:0005887,GO:0005938,GO:0006810,GO:0007154,GO:0007165,GO:0008150,GO:0009719,GO:0009725,GO:0009733,GO:0009734,GO:0009755,GO:0009987,GO:0010033,GO:0016020,GO:0016021,GO:0022857,GO:0023052,GO:0031224,GO:0031226,GO:0032870,GO:0042221,GO:0044424,GO:0044425,GO:0044444,GO:0044459,GO:0044464,GO:0050789,GO:0050794,GO:0050896,GO:…	-
Mt0001_00484	Medtr4g124795		0.14	0.03	1.28	7.02	8.31	5.14	0.483333	6.82333	3.8194	0.00152209	0.0320066	Q	flavin-containing monooxygenase	FMO1	GO:0000166,GO:0001666,GO:0002218,GO:0002253,GO:0002376,GO:0002682,GO:0002684,GO:0003674,GO:0003824,GO:0004497,GO:0004499,GO:0005488,GO:0006950,GO:0006952,GO:0006955,GO:0007154,GO:0007165,GO:0008150,GO:0008152,GO:0008219,GO:0009605,GO:0009607,GO:0009617,GO:0009620,GO:0009626,GO:0009627,GO:0009628,GO:0009814,GO:0009870,GO:0009987,GO:0010204,GO:0012501,GO:0016491,GO:0016705,GO:0016709,GO:0023052,GO:…	ko:K00485
Mt0091_10067	Medtr3g436860		1.03	1.06	3.74	6.15	10.17	3.52	1.94333	6.61333	1.7668	0.001524	0.0320277	S	f-box protein	-	-	-
Mt0007_00247	Medtr3g092890		12.63	9.61	5.38	29.66	13.98	19.47	9.20667	21.0367	1.1922	0.00153962	0.0322974	Q	Belongs to the iron ascorbate-dependent oxidoreductase family	-	GO:0001101,GO:0002229,GO:0002239,GO:0003674,GO:0003824,GO:0004497,GO:0005488,GO:0006082,GO:0006725,GO:0006950,GO:0006952,GO:0007275,GO:0007568,GO:0008150,GO:0008152,GO:0009056,GO:0009058,GO:0009605,GO:0009607,GO:0009617,GO:0009620,GO:0009696,GO:0009719,GO:0009725,GO:0009751,GO:0009812,GO:0009813,GO:0009987,GO:0010033,GO:0010150,GO:0010817,GO:0014070,GO:0016054,GO:0016491,GO:0016705,GO:0016706,GO:…	-
Mt0003_00294	Medtr4g057595		8.99	12.29	18.45	79.04	12.25	38.68	13.2433	43.3233	1.7099	0.00158197	0.0330487	O	Belongs to the peptidase S10 family	-	GO:0003674,GO:0003824,GO:0004180,GO:0004185,GO:0005575,GO:0005576,GO:0005622,GO:0005623,GO:0005737,GO:0005773,GO:0006508,GO:0006807,GO:0008150,GO:0008152,GO:0008233,GO:0008236,GO:0008238,GO:0009056,GO:0009057,GO:0009987,GO:0016787,GO:0017171,GO:0019538,GO:0030163,GO:0043170,GO:0043226,GO:0043227,GO:0043229,GO:0043231,GO:0044237,GO:0044238,GO:0044248,GO:0044257,GO:0044260,GO:0044265,GO:0044267,GO:…	ko:K16298
Mt0043_00026	Medtr7g096610		0.58	0.99	0.62	0.18	0.26	0.17	0.73	0.203333	-1.844	0.00160158	0.0333398	S	LOB domain-containing protein	-	GO:0003674,GO:0005488,GO:0005515,GO:0005575,GO:0005622,GO:0005623,GO:0005634,GO:0007275,GO:0008150,GO:0009653,GO:0009791,GO:0010015,GO:0010101,GO:0010102,GO:0010311,GO:0022622,GO:0032501,GO:0032502,GO:0042802,GO:0042803,GO:0043226,GO:0043227,GO:0043229,GO:0043231,GO:0044424,GO:0044464,GO:0046983,GO:0048364,GO:0048527,GO:0048528,GO:0048646,GO:0048731,GO:0048830,GO:0048856,GO:0090696,GO:0090697,GO:…	ko:K13945
Mt0086_10104	Medtr7g065720		6.48	7.4	15.66	20.55	30.75	15.36	9.84667	22.22	1.1742	0.0016067	0.0334069	O	Belongs to the GST superfamily	-	GO:0001101,GO:0003674,GO:0003824,GO:0004364,GO:0005575,GO:0005622,GO:0005623,GO:0005737,GO:0005829,GO:0006518,GO:0006575,GO:0006749,GO:0006790,GO:0006807,GO:0006950,GO:0008150,GO:0008152,GO:0009056,GO:0009266,GO:0009404,GO:0009407,GO:0009408,GO:0009628,GO:0009636,GO:0009719,GO:0009725,GO:0009733,GO:0009735,GO:0009737,GO:0009739,GO:0009987,GO:0010033,GO:0010035,GO:0010038,GO:0016740,GO:0016765,GO:…	ko:K00799
Mt0010_10850	Medtr4g116260		0.75	0.69	0.79	0.22	0.06	0.3	0.743333	0.193333	-1.9429	0.00162718	0.0337729	S	Plant transposon protein	-	-	-
Mt0012_10792	Medtr5g030420		19.18	13.55	4.04	27.45	38.96	40.44	12.2567	35.6167	1.539	0.00166323	0.0344106	K	transcription factor	-	GO:0001101,GO:0003674,GO:0003676,GO:0003677,GO:0003700,GO:0005488,GO:0005509,GO:0005515,GO:0005575,GO:0005622,GO:0005623,GO:0005634,GO:0006139,GO:0006351,GO:0006355,GO:0006725,GO:0006807,GO:0006950,GO:0006952,GO:0006970,GO:0006972,GO:0008134,GO:0008150,GO:0008152,GO:0009058,GO:0009059,GO:0009628,GO:0009651,GO:0009718,GO:0009719,GO:0009725,GO:0009753,GO:0009812,GO:0009813,GO:0009889,GO:0009891,GO:…	ko:K13422
Mt0018_10155	Medtr2g028330		0.58	0.36	0.66	1.17	1.19	1.29	0.533333	1.21667	1.1898	0.00171235	0.0351431	J	translation elongation factor activity	MEFG	GO:0000166,GO:0000287,GO:0001882,GO:0001883,GO:0003674,GO:0003676,GO:0003723,GO:0003746,GO:0003824,GO:0003924,GO:0005488,GO:0005524,GO:0005525,GO:0005575,GO:0005622,GO:0005623,GO:0005737,GO:0005739,GO:0006412,GO:0006414,GO:0006518,GO:0006807,GO:0008135,GO:0008144,GO:0008150,GO:0008152,GO:0009058,GO:0009059,GO:0009987,GO:0010035,GO:0010038,GO:0010467,GO:0016462,GO:0016787,GO:0016817,GO:0016818,GO:…	ko:K02355
Mt0101_10002	Medtr0062s0020		0	0.03	0.13	0.49	0.51	0.3	0.0533333	0.433333	3.0224	0.00171316	0.0351431	G	Belongs to the glycosyl hydrolase 18 family	-	-	-
Mt0020_10313	Medtr8g077770		1.72	1.78	6.4	6.62	25.53	7.07	3.3	13.0733	1.9861	0.00173209	0.0354077	K	ribonuclease III activity	-	-	ko:K11592
Mt0017_00509	Medtr3g017490		2.3	2.84	1.51	3.48	4.33	6.07	2.21667	4.62667	1.0616	0.0017853	0.0363688	O	Glutaredoxin	-	GO:0003674,GO:0003824,GO:0005575,GO:0005623,GO:0005886,GO:0006091,GO:0008150,GO:0008152,GO:0009055,GO:0009987,GO:0015035,GO:0015036,GO:0016020,GO:0016491,GO:0016667,GO:0019725,GO:0022900,GO:0042592,GO:0044237,GO:0044464,GO:0045454,GO:0050789,GO:0050794,GO:0055114,GO:0065007,GO:0065008,GO:0071944	ko:K17479
Mt0032_00005	Medtr6g040230		0.86	0.76	0.79	2.86	1.09	1.96	0.803333	1.97	1.2941	0.00178717	0.0363713	M	Choline ethanolamine	-	GO:0000166,GO:0003674,GO:0003824,GO:0004103,GO:0004305,GO:0005488,GO:0005524,GO:0005575,GO:0005622,GO:0005623,GO:0005737,GO:0005829,GO:0006629,GO:0006644,GO:0006646,GO:0006650,GO:0006656,GO:0006657,GO:0006793,GO:0006796,GO:0006807,GO:0006950,GO:0008144,GO:0008150,GO:0008152,GO:0008610,GO:0008654,GO:0009058,GO:0009611,GO:0009987,GO:0016301,GO:0016310,GO:0016740,GO:0016772,GO:0016773,GO:0017076,GO:…	ko:K14156
Mt0011_00595	Medtr7g082730		24.05	21.24	11.85	29.75	35.05	55.86	19.0467	40.22	1.0784	0.0017892	0.0363853	-	-	-	-	-
Mt0007_00560	Medtr3g100010		0	0	0	0.22	0.1	0.3	0.001	0.206667	7.6912	0.00179111	0.0364031	V	Belongs to the serpin family	-	GO:0003674,GO:0004857,GO:0004866,GO:0004867,GO:0004869,GO:0005575,GO:0005576,GO:0005615,GO:0005622,GO:0005623,GO:0005737,GO:0008150,GO:0009892,GO:0010466,GO:0010605,GO:0010951,GO:0019222,GO:0030162,GO:0030234,GO:0030414,GO:0031323,GO:0031324,GO:0032268,GO:0032269,GO:0043086,GO:0044092,GO:0044421,GO:0044424,GO:0044464,GO:0045861,GO:0048046,GO:0048519,GO:0048523,GO:0050789,GO:0050790,GO:0050794,GO:…	ko:K13963
Mt0013_10262	Medtr3g031650		0.86	0.66	0.53	0.15	0.26	0.07	0.683333	0.16	-2.0945	0.00179361	0.0364072	#N/A	#N/A	#N/A	#N/A	#N/A
Mt0006_10398	Medtr3g081690		2.68	3.3	6.99	11.17	8.79	7.6	4.32333	9.18667	1.0874	0.00179416	0.0364072	P	Zinc transporter	-	GO:0000041,GO:0003674,GO:0005215,GO:0005385,GO:0005575,GO:0005623,GO:0005886,GO:0006810,GO:0006811,GO:0006812,GO:0006829,GO:0008150,GO:0008324,GO:0015075,GO:0015318,GO:0016020,GO:0016021,GO:0022857,GO:0022890,GO:0030001,GO:0031224,GO:0034220,GO:0044425,GO:0044464,GO:0046873,GO:0046915,GO:0051179,GO:0051234,GO:0055085,GO:0070838,GO:0071577,GO:0071944,GO:0072509,GO:0072511,GO:0098655,GO:0098660,GO:…	ko:K14709
Mt0026_10264	Medtr7g072420		14.86	18.24	31.19	61.91	46.95	26.61	21.43	45.1567	1.0753	0.00179545	0.0364072	#N/A	#N/A	#N/A	#N/A	#N/A
Mt0006_10425	Medtr3g081130		13.55	7.93	34.01	28.43	89.79	57.22	18.4967	58.48	1.6607	0.00180862	0.0366378	E	Plant lipoxygenase may be involved in a number of diverse aspects of plant physiology including growth and development, pest resistance, and senescence or responses to wounding	LOX2	GO:0003674,GO:0003824,GO:0005488,GO:0005575,GO:0005622,GO:0005623,GO:0005737,GO:0006082,GO:0006629,GO:0006631,GO:0006633,GO:0008150,GO:0008152,GO:0008610,GO:0009058,GO:0009987,GO:0016053,GO:0016165,GO:0016491,GO:0016701,GO:0016702,GO:0019752,GO:0031407,GO:0031408,GO:0032787,GO:0043167,GO:0043169,GO:0043436,GO:0044237,GO:0044238,GO:0044249,GO:0044255,GO:0044281,GO:0044283,GO:0044424,GO:0044464,GO:…	ko:K00454,ko:K15718
Mt0009_11004	Medtr8g106245		1.17	1.06	1.44	0.49	0.58	0.46	1.22333	0.51	-1.2622	0.00181235	0.0366865	S	PB1 domain	-	-	-
Mt0104_10025	Medtr8g047160		0.07	0	0	1.11	0.13	0.33	0.0233333	0.523333	4.4873	0.00183879	0.0371151	T	LRR receptor-like kinase family protein	-	-	ko:K04733
Mt0039_10246	Medtr1g086530		1.1	0.93	0.98	2.43	1.35	2.72	1.00333	2.16667	1.1107	0.00184074	0.0371308	K	transcription factor	-	GO:0003674,GO:0003676,GO:0003677,GO:0005488,GO:0005575,GO:0005622,GO:0005623,GO:0005634,GO:0006139,GO:0006351,GO:0006355,GO:0006725,GO:0006807,GO:0008150,GO:0008152,GO:0009058,GO:0009059,GO:0009889,GO:0009987,GO:0010467,GO:0010468,GO:0010556,GO:0016070,GO:0018130,GO:0019219,GO:0019222,GO:0019438,GO:0031323,GO:0031326,GO:0032774,GO:0034641,GO:0034645,GO:0034654,GO:0043170,GO:0043226,GO:0043227,GO:…	ko:K09422
Mt0024_00111	Medtr6g084770		7.93	3.24	0.72	12.31	17.38	19.84	3.96333	16.51	2.0586	0.00185023	0.0372606	Q	Cytochrome p450	-	GO:0000003,GO:0003006,GO:0003674,GO:0003824,GO:0004497,GO:0005488,GO:0005506,GO:0005575,GO:0005622,GO:0005623,GO:0005737,GO:0005783,GO:0005789,GO:0007275,GO:0007568,GO:0008150,GO:0008152,GO:0009058,GO:0009835,GO:0010154,GO:0012505,GO:0016020,GO:0016021,GO:0016491,GO:0016705,GO:0016709,GO:0019748,GO:0020037,GO:0021700,GO:0022414,GO:0031090,GO:0031224,GO:0031984,GO:0032501,GO:0032502,GO:0042175,GO:…	ko:K20562
Mt0014_00348	Medtr5g010510		0.03	0.26	0.23	2.37	0.22	1.23	0.173333	1.27333	2.877	0.00186582	0.0375316	#N/A	#N/A	#N/A	#N/A	#N/A
Mt0038_00245	Medtr8g069915		0.31	0.53	0.85	1.42	1.25	1.43	0.563333	1.36667	1.2786	0.00187651	0.0377252	T	calcium-binding protein	-	GO:0003674,GO:0005488,GO:0005509,GO:0043167,GO:0043169,GO:0046872	ko:K13448
Mt0042_00122	Medtr0119s0010		2.06	2.15	2.46	7.66	3.34	3.38	2.22333	4.79333	1.1083	0.00196626	0.039216	S	Vacuolar iron transporter homolog	-	GO:0000041,GO:0000302,GO:0003674,GO:0005215,GO:0005381,GO:0005384,GO:0005575,GO:0005622,GO:0005623,GO:0005737,GO:0005773,GO:0005774,GO:0006810,GO:0006811,GO:0006812,GO:0006826,GO:0006828,GO:0006873,GO:0006875,GO:0006879,GO:0006880,GO:0006950,GO:0006979,GO:0008150,GO:0008324,GO:0009719,GO:0009723,GO:0009725,GO:0009987,GO:0010033,GO:0010035,GO:0010038,GO:0010039,GO:0015075,GO:0015318,GO:0016020,GO:…	-
Mt0009_10266	Medtr8g089830		0	0.1	0.07	0.46	0.29	0.43	0.0566667	0.393333	2.7952	0.00197468	0.0393618	#N/A	#N/A	#N/A	#N/A	#N/A
Mt0005_10502	Medtr5g015190		13.48	10.14	4.79	12.55	32.74	31.68	9.47	25.6567	1.4379	0.00203195	0.0403208	S	VQ motif-containing protein	-	-	-
Mt0009_00999	Medtr8g106415		0.27	0.1	0.3	0.8	0.61	0.76	0.223333	0.723333	1.6955	0.00204434	0.0405437	S	chromatin binding	-	-	-
Mt0029_00299	Medtr1g115345		2.5	2.08	4.63	6.55	8.05	4.64	3.07	6.41333	1.0628	0.00206084	0.0408317	S	ZINC FINGER protein	-	GO:0003674,GO:0003676,GO:0003700,GO:0005488,GO:0005575,GO:0005622,GO:0005623,GO:0005634,GO:0006139,GO:0006351,GO:0006355,GO:0006725,GO:0006807,GO:0008150,GO:0008152,GO:0009058,GO:0009059,GO:0009889,GO:0009987,GO:0010033,GO:0010035,GO:0010038,GO:0010045,GO:0010200,GO:0010243,GO:0010467,GO:0010468,GO:0010556,GO:0016070,GO:0018130,GO:0019219,GO:0019222,GO:0019438,GO:0031323,GO:0031326,GO:0032774,GO:…	-
Mt0012_20004	Medtr5g047670		3.22	2.41	3.35	1.51	1.06	1.86	2.99333	1.47667	-1.0194	0.00206118	0.0408317	#N/A	#N/A	#N/A	#N/A	#N/A
Mt0041_10217	Medtr4g091740		0.24	0.17	0.3	0.95	0.77	0.5	0.236667	0.74	1.6447	0.00206271	0.0408392	T	G-type lectin S-receptor-like serine threonine-protein kinase	-	GO:0000003,GO:0000166,GO:0003674,GO:0003824,GO:0004672,GO:0004674,GO:0005488,GO:0005515,GO:0005516,GO:0005524,GO:0005575,GO:0005623,GO:0005886,GO:0006464,GO:0006468,GO:0006793,GO:0006796,GO:0006807,GO:0007154,GO:0008037,GO:0008144,GO:0008150,GO:0008152,GO:0009856,GO:0009875,GO:0009987,GO:0016020,GO:0016021,GO:0016301,GO:0016310,GO:0016740,GO:0016772,GO:0016773,GO:0017076,GO:0019538,GO:0022414,GO:…	-
Mt0010_10206	Medtr1g058550		1.03	0.69	0.62	0.18	0.26	0.27	0.78	0.236667	-1.7206	0.00207606	0.0410472	S	Plant invertase/pectin methylesterase inhibitor	-	-	-
Mt0048_00145	Medtr2g073100	NCR	3.81	3.07	2.72	1.51	1.19	2.02	3.2	1.57333	-1.0242	0.00210068	0.0414743	#N/A	#N/A	#N/A	#N/A	#N/A
Mt0019_10526	Medtr2g090755	GRX	1.34	0.99	1.61	1.54	7.44	3.58	1.31333	4.18667	1.6726	0.00210526	0.0415182	O	Glutaredoxin	-	GO:0001101,GO:0003674,GO:0003824,GO:0005488,GO:0005575,GO:0005622,GO:0005623,GO:0005634,GO:0005737,GO:0006091,GO:0007154,GO:0007165,GO:0008150,GO:0008152,GO:0009055,GO:0009719,GO:0009725,GO:0009751,GO:0009753,GO:0009755,GO:0009863,GO:0009867,GO:0009987,GO:0010033,GO:0014070,GO:0015035,GO:0015036,GO:0016491,GO:0016667,GO:0019725,GO:0022900,GO:0023052,GO:0032870,GO:0035690,GO:0042221,GO:0042493,GO:…	ko:K03676
Mt0023_00217	Medtr2g011150		4.94	5.65	3.51	3.17	1.7	1.92	4.7	2.26333	-1.0542	0.00211098	0.0416078	T	Serine threonine-protein kinase	-	-	-
Mt0052_10074	Medtr6g077870		35.51	52.7	62.44	241.81	51.15	112.49	50.2167	135.15	1.4283	0.00211361	0.041613	S	Transporter	-	GO:0003674,GO:0005215,GO:0005575,GO:0005623,GO:0005886,GO:0006810,GO:0008150,GO:0016020,GO:0016021,GO:0022857,GO:0031224,GO:0044425,GO:0044464,GO:0051179,GO:0051234,GO:0055085,GO:0071944	-
Mt0021_00419	Medtr7g014630		0.41	0.66	0.72	2.65	0.93	1.43	0.596667	1.67	1.4849	0.00211924	0.0416773	H	Isoflavonoid malonyl transferase	-	GO:0003674,GO:0003824,GO:0005575,GO:0005622,GO:0005623,GO:0005737,GO:0016740,GO:0016746,GO:0016747,GO:0044424,GO:0044464,GO:0047183,GO:0047634,GO:0102777,GO:0102815	-
Mt0003_01159	Medtr4g077320		0.48	0.53	0.36	0.12	0.1	0.03	0.456667	0.0833333	-2.4542	0.00212504	0.0417213	Z	U4 U6.U5 tri-snRNP-associated protein 2-like	-	GO:0000245,GO:0000375,GO:0000377,GO:0000398,GO:0003674,GO:0003824,GO:0005488,GO:0005575,GO:0005622,GO:0005623,GO:0005634,GO:0005654,GO:0005681,GO:0006139,GO:0006396,GO:0006397,GO:0006464,GO:0006508,GO:0006725,GO:0006807,GO:0007049,GO:0008150,GO:0008152,GO:0008233,GO:0008234,GO:0008270,GO:0008380,GO:0009987,GO:0010467,GO:0016043,GO:0016070,GO:0016071,GO:0016579,GO:0016787,GO:0019538,GO:0019783,GO:…	ko:K12847
Mt0003_10692	Medtr4g066170		0	0	0	0.18	0.13	0.23	0.001	0.18	7.4919	0.00213283	0.0418277	E	Plant lipoxygenase may be involved in a number of diverse aspects of plant physiology including growth and development, pest resistance, and senescence or responses to wounding	-	-	ko:K00454
Mt0006_00073	Medtr3g087930		1.03	1.42	1.05	0.46	0.45	0.53	1.16667	0.48	-1.2813	0.00213659	0.0418781	#N/A	#N/A	#N/A	#N/A	#N/A
Mt0028_10097	Medtr8g018650		32.08	27.89	72.55	100.09	130.33	65.85	44.1733	98.7567	1.1607	0.00214019	0.041902	E	Plant lipoxygenase may be involved in a number of diverse aspects of plant physiology including growth and development, pest resistance, and senescence or responses to wounding	LOX2	-	ko:K00454,ko:K15718
Mt0006_10414	Medtr3g081380		0	0	0	0.43	0.19	0.07	0.001	0.23	7.8455	0.00214628	0.0419979	K	Transcriptional adapter	-	GO:0003674,GO:0003676,GO:0003677,GO:0003682,GO:0003700,GO:0003712,GO:0003713,GO:0005488,GO:0005575,GO:0005622,GO:0005623,GO:0005634,GO:0006139,GO:0006325,GO:0006338,GO:0006351,GO:0006355,GO:0006357,GO:0006464,GO:0006473,GO:0006475,GO:0006725,GO:0006807,GO:0006996,GO:0008150,GO:0008152,GO:0008270,GO:0009058,GO:0009059,GO:0009889,GO:0009891,GO:0009893,GO:0009987,GO:0010467,GO:0010468,GO:0010556,GO:…	ko:K11314
Mt0087_10075	Medtr7g007440		0.79	0.69	0.39	2.22	1.06	1.53	0.623333	1.60333	1.363	0.00214769	0.0420023	S	Nonspecific lipid-transfer protein	-	-	-
Mt0014_00478	Medtr4g027000	NCR	5.76	4.26	9.85	2.98	2.28	3.58	6.62333	2.94667	-1.1685	0.00216312	0.0422102	#N/A	#N/A	#N/A	#N/A	#N/A
Mt0064_00067	Medtr4g009260		1.2	1.32	0.98	0.34	0.48	0.56	1.16667	0.46	-1.3427	0.00224611	0.0435401	K	transcription factor	-	GO:0000160,GO:0003674,GO:0003676,GO:0003677,GO:0003700,GO:0005488,GO:0005575,GO:0005622,GO:0005623,GO:0005634,GO:0006139,GO:0006351,GO:0006355,GO:0006725,GO:0006807,GO:0007154,GO:0007165,GO:0008150,GO:0008152,GO:0009058,GO:0009059,GO:0009719,GO:0009723,GO:0009725,GO:0009755,GO:0009873,GO:0009889,GO:0009987,GO:0010033,GO:0010467,GO:0010468,GO:0010556,GO:0016070,GO:0018130,GO:0019219,GO:0019222,GO:…	-
Mt0009_00124	Medtr8g087425		7.55	8.36	23.77	40.18	34.76	22.16	13.2267	32.3667	1.2911	0.00225251	0.0436402	O	glutathione transferase activity	GSTU6	GO:0003674,GO:0003824,GO:0004364,GO:0005488,GO:0005575,GO:0005622,GO:0005623,GO:0005737,GO:0005829,GO:0005886,GO:0005911,GO:0006518,GO:0006575,GO:0006749,GO:0006790,GO:0006807,GO:0006950,GO:0006979,GO:0008150,GO:0008152,GO:0009056,GO:0009404,GO:0009407,GO:0009506,GO:0009636,GO:0009987,GO:0016020,GO:0016740,GO:0016765,GO:0019748,GO:0030054,GO:0033218,GO:0034641,GO:0042221,GO:0042277,GO:0043167,GO:…	ko:K00799
Mt0086_00014	Medtr7g063270		0	0.03	0	0.86	0.1	0.17	0.01	0.376667	5.2352	0.00232702	0.0448616	Q	Tropinone reductase homolog	-	-	ko:K08081
Mt0018_00455	Medtr2g035120		38.05	35.35	133.21	347.71	143.95	134.75	68.87	208.803	1.6002	0.00234045	0.0450712	S	Major allergen Pru	-	GO:0006950,GO:0006952,GO:0008150,GO:0009607,GO:0050896	-
Mt0007_00215	Medtr3g092400		0.24	0.17	0.23	2.37	0.48	0.46	0.213333	1.10333	2.3707	0.0023598	0.0453943	#N/A	#N/A	#N/A	#N/A	#N/A
Mt0008_00174	Medtr5g055310		3.22	3.34	3.38	10.92	3.3	8.72	3.31333	7.64667	1.2065	0.0023727	0.0455677	T	serine threonine-protein kinase	-	GO:0000166,GO:0001871,GO:0003674,GO:0003824,GO:0004672,GO:0004674,GO:0005488,GO:0005524,GO:0005575,GO:0005623,GO:0005886,GO:0006464,GO:0006468,GO:0006793,GO:0006796,GO:0006807,GO:0007154,GO:0007165,GO:0007166,GO:0008144,GO:0008150,GO:0008152,GO:0009987,GO:0016020,GO:0016021,GO:0016301,GO:0016310,GO:0016740,GO:0016772,GO:0016773,GO:0017076,GO:0019538,GO:0023052,GO:0030246,GO:0030247,GO:0030554,GO:…	ko:K04733
Mt0013_00034	Medtr3g063240		0.17	0.3	0.16	0.83	0.45	0.83	0.21	0.703333	1.7438	0.00241111	0.0461545	EG	WAT1-related protein At3g02690	-	GO:0005575,GO:0005622,GO:0005623,GO:0005737,GO:0005886,GO:0009507,GO:0009526,GO:0009536,GO:0009941,GO:0016020,GO:0016021,GO:0031090,GO:0031224,GO:0031967,GO:0031969,GO:0031975,GO:0042170,GO:0043226,GO:0043227,GO:0043229,GO:0043231,GO:0044422,GO:0044424,GO:0044425,GO:0044434,GO:0044435,GO:0044444,GO:0044446,GO:0044464,GO:0071944	-
Mt0013_10322	Medtr3g464620		0	0	0	0.71	0.06	0.1	0.001	0.29	8.1799	0.00242105	0.0462987	#N/A	#N/A	#N/A	#N/A	#N/A
Mt0002_01151	Medtr7g056140		0.21	0.17	0.16	0	0	0	0.18	0.001	-7.4919	0.002485	0.0473629	#N/A	#N/A	#N/A	#N/A	#N/A
Mt0019_00517	Medtr1g037370		2.37	3.47	2.27	1.38	0.67	1.46	2.70333	1.17	-1.2082	0.00254595	0.0483415	Q	Belongs to the cytochrome P450 family	-	GO:0003674,GO:0003824,GO:0004497,GO:0005488,GO:0005506,GO:0005575,GO:0008150,GO:0008152,GO:0009058,GO:0016020,GO:0016021,GO:0016491,GO:0016705,GO:0016709,GO:0019748,GO:0020037,GO:0031224,GO:0043167,GO:0043169,GO:0044425,GO:0044550,GO:0046872,GO:0046906,GO:0046914,GO:0048037,GO:0055114,GO:0097159,GO:1901363	ko:K20556
Mt0002_00592	Medtr1g021440		1.37	1.52	1.81	0.86	0.51	0.8	1.56667	0.723333	-1.115	0.00260115	0.0492039	K	B3 domain-containing protein	-	GO:0003674,GO:0003676,GO:0003677,GO:0005488,GO:0005575,GO:0005622,GO:0005623,GO:0005634,GO:0006139,GO:0006351,GO:0006355,GO:0006725,GO:0006807,GO:0008150,GO:0008152,GO:0009058,GO:0009059,GO:0009889,GO:0009987,GO:0010467,GO:0010468,GO:0010556,GO:0016070,GO:0018130,GO:0019219,GO:0019222,GO:0019438,GO:0031323,GO:0031326,GO:0032774,GO:0034641,GO:0034645,GO:0034654,GO:0043170,GO:0043226,GO:0043227,GO:…	-
Mt0048_00111	Medtr2g073660		0.14	0.26	0.2	0.62	0.64	0.6	0.2	0.62	1.6323	0.00260402	0.0492319	#N/A	#N/A	#N/A	#N/A	#N/A
Mt0001_11768	Medtr2g461310		0.55	0.4	0.16	0.06	0	0	0.37	0.02	-4.2095	0.00261644	0.049387	S	Polygalacturonase	PGIP2	GO:0005575,GO:0005576,GO:0005618,GO:0005623,GO:0006950,GO:0006952,GO:0008150,GO:0016020,GO:0030312,GO:0044464,GO:0050896,GO:0071944	-
Mt0031_00131	Medtr7g061190		3.53	4.43	6.01	2.37	2.79	1.29	4.65667	2.15	-1.115	0.00261852	0.0493998	K	Floral homeotic protein	-	GO:0000003,GO:0000160,GO:0003002,GO:0003006,GO:0003674,GO:0003676,GO:0003677,GO:0003700,GO:0005488,GO:0005575,GO:0005622,GO:0005623,GO:0005634,GO:0006139,GO:0006351,GO:0006355,GO:0006725,GO:0006807,GO:0007154,GO:0007165,GO:0007275,GO:0007389,GO:0008150,GO:0008152,GO:0009058,GO:0009059,GO:0009653,GO:0009719,GO:0009723,GO:0009725,GO:0009755,GO:0009791,GO:0009873,GO:0009888,GO:0009889,GO:0009908,GO:…	ko:K09284

## Sheet: 10 dpi
Table S1: Annotated list of plant genes that are differentially expressed in nad1-1 nodules relative to wild type nodules.
We considered plant genes to be differentially expressed if the log2-fold change relative to wild type nodules was greater than 1 and if the adjusted P-Value was below 0.05.
Table legend: 'NA' means data not available
Gene ID（Mt20120830-LIPM)	Gene ID (Mt4.0v1-JCVI )	Gene Name	WT-1 (CPM)	WT-2 (CPM)	WT-3 (CPM)	nad1-1-1 (CPM)	nad1-1-2 (CPM)	nad1-1-3(CPM)	WT_mean	nad1-1_mean	log2(fc)	PValue	FDR	COG_category	Description	Preferred_name	GOs	KEGG_ko
Mt0002_01817	Medtr2g072660		159.47	131.25	158.31	5.33	5.22	4.75	149.677	5.1	-4.8752	0	0	#N/A	#N/A	#N/A	#N/A	#N/A
Mt0016_00284	Medtr2g099790		347.94	334.95	367.9	10.66	10.63	9.98	350.263	10.4233	-5.0706	0	0	S	Short calmodulin-binding motif containing conserved Ile and Gln residues.	-	-	-
Mt0017_00062	Medtr3g006380	NCR	163.92	152.89	159.49	5.63	4.39	5.12	158.767	5.04667	-4.9754	0	0	#N/A	#N/A	#N/A	#N/A	#N/A
Mt0003_00738	Medtr4g068000		1053.07	886.27	985.15	36.86	35.55	32.58	974.83	34.9967	-4.7999	0	0	K	RWP-RK domain	-	GO:0003674,GO:0003676,GO:0003677,GO:0003700,GO:0005488,GO:0005575,GO:0005622,GO:0005623,GO:0005634,GO:0006139,GO:0006351,GO:0006355,GO:0006725,GO:0006807,GO:0008150,GO:0008152,GO:0009058,GO:0009059,GO:0009889,GO:0009987,GO:0010467,GO:0010468,GO:0010556,GO:0016070,GO:0018130,GO:0019219,GO:0019222,GO:0019438,GO:0031323,GO:0031326,GO:0032774,GO:0034641,GO:0034645,GO:0034654,GO:0043170,GO:0043226,GO:…	-
Mt0001_11793	Medtr4g094360		324.42	331.7	372.27	7.69	6.42	7.32	342.797	7.14333	-5.5846	0	0	S	WAT1-related protein	-	GO:0003674,GO:0005215,GO:0005575,GO:0005622,GO:0005623,GO:0005737,GO:0005886,GO:0005887,GO:0005938,GO:0006810,GO:0007154,GO:0007165,GO:0008150,GO:0009719,GO:0009725,GO:0009733,GO:0009734,GO:0009755,GO:0009987,GO:0010033,GO:0016020,GO:0016021,GO:0022857,GO:0023052,GO:0031224,GO:0031226,GO:0032870,GO:0042221,GO:0044424,GO:0044425,GO:0044444,GO:0044459,GO:0044464,GO:0050789,GO:0050794,GO:0050896,GO:…	-
Mt0008_10375	Medtr5g061860		490.19	475.96	503.12	31.8	33.56	28.96	489.757	31.44	-3.9614	0	0	P	low affinity sulfate transporter	-	GO:0003674,GO:0005215,GO:0005575,GO:0005623,GO:0005886,GO:0005887,GO:0006810,GO:0006811,GO:0006820,GO:0008150,GO:0008271,GO:0008272,GO:0008509,GO:0015075,GO:0015103,GO:0015116,GO:0015291,GO:0015293,GO:0015318,GO:0015698,GO:0016020,GO:0016021,GO:0022804,GO:0022857,GO:0031224,GO:0031226,GO:0034220,GO:0044425,GO:0044459,GO:0044464,GO:0051179,GO:0051234,GO:0055085,GO:0071944,GO:0072348,GO:0098656,GO:…	ko:K17469
Mt0012_10250	Medtr5g042910		102.24	97.58	101.86	1.62	1.38	1.33	100.56	1.44333	-6.1225	0	0	S	Protein of unknown function (DUF1336)	-	-	-
Mt0024_10153	Medtr6g086060		123.01	109.57	113.17	7.08	6.18	5.93	115.25	6.39667	-4.1713	0	0	S	Serine incorporator	-	GO:0003333,GO:0003674,GO:0005215,GO:0005342,GO:0005575,GO:0005622,GO:0005623,GO:0005737,GO:0005783,GO:0005789,GO:0006629,GO:0006644,GO:0006793,GO:0006796,GO:0006810,GO:0006811,GO:0006812,GO:0006820,GO:0006865,GO:0008150,GO:0008152,GO:0008324,GO:0008509,GO:0008514,GO:0008610,GO:0008654,GO:0009058,GO:0009987,GO:0012505,GO:0015075,GO:0015171,GO:0015175,GO:0015179,GO:0015194,GO:0015318,GO:0015711,GO:…	-
Mt0013_00713	Medtr3g055520	MtCaML1 &3	317.45	302.89	314.64	14.33	16.38	16.23	311.66	15.6467	-4.316	3.76856e-298	1.46128e-294	#N/A	#N/A	#N/A	#N/A	#N/A
Mt0018_00225	Medtr2g029560		2.4	1.57	1.42	161.04	156.81	142.25	1.79667	153.367	6.4155	8.79723e-298	3.07006e-294	Q	Belongs to the peroxidase family. Classical plant (class III) peroxidase subfamily	-	GO:0000902,GO:0002682,GO:0002684,GO:0003674,GO:0003824,GO:0004601,GO:0005488,GO:0005575,GO:0005576,GO:0005618,GO:0005622,GO:0005623,GO:0005737,GO:0005773,GO:0005774,GO:0005794,GO:0006950,GO:0006952,GO:0006970,GO:0006979,GO:0008150,GO:0008152,GO:0009056,GO:0009314,GO:0009416,GO:0009505,GO:0009605,GO:0009607,GO:0009617,GO:0009620,GO:0009628,GO:0009636,GO:0009651,GO:0009653,GO:0009719,GO:0009725,GO:…	ko:K00430
Mt0008_10574	Medtr5g066070		22418.9	25648.1	25511	980.76	1038.56	949.17	24526	989.497	-4.6315	1.42725e-289	4.52802e-286	C	Belongs to the globin family	-	GO:0003674,GO:0005344,GO:0005488,GO:0006082,GO:0006629,GO:0006631,GO:0006638,GO:0006639,GO:0006641,GO:0006810,GO:0008144,GO:0008150,GO:0008152,GO:0008610,GO:0009058,GO:0009877,GO:0009987,GO:0015669,GO:0015671,GO:0015893,GO:0019432,GO:0019752,GO:0019825,GO:0020037,GO:0032787,GO:0036094,GO:0042221,GO:0042493,GO:0043167,GO:0043169,GO:0043436,GO:0044237,GO:0044238,GO:0044249,GO:0044255,GO:0044281,GO:…	ko:K21893
Mt0008_10844	Medtr5g072340		3.74	4.17	2.95	186.88	160.59	154.43	3.62	167.3	5.5303	9.1531e-267	2.28161e-263	T	Belongs to the disease resistance NB-LRR family	-	-	ko:K15078
Mt0008_10398	Medtr5g062510	NCR194-TC40662	213.68	186.41	237.95	9	8.6	8.91	212.68	8.83667	-4.589	2.37874e-260	5.53421e-257	#N/A	#N/A	#N/A	#N/A	#N/A
Mt0027_10015	Medtr1g099310		5.04	3.91	3.64	120.77	109.09	117.45	4.19667	115.77	4.7859	7.90741e-260	1.7247e-256	M	Belongs to the glycosyl hydrolase 18 family	-	GO:0000272,GO:0003674,GO:0003824,GO:0004553,GO:0004568,GO:0005575,GO:0005576,GO:0005615,GO:0005975,GO:0005976,GO:0006022,GO:0006026,GO:0006030,GO:0006032,GO:0006040,GO:0006807,GO:0008150,GO:0008152,GO:0009056,GO:0009057,GO:0009987,GO:0016052,GO:0016787,GO:0016798,GO:0017144,GO:0042737,GO:0043170,GO:0044237,GO:0044238,GO:0044248,GO:0044421,GO:0046348,GO:0071704,GO:1901071,GO:1901072,GO:1901135,GO:…	ko:K01183
Mt0028_10087	Medtr8g018520		12.35	9.8	13.45	638.54	471.3	570.03	11.8667	559.957	5.5603	1.21557e-257	2.49536e-254	E	Plant lipoxygenase may be involved in a number of diverse aspects of plant physiology including growth and development, pest resistance, and senescence or responses to wounding	LOX2	-	ko:K00454,ko:K15718
Mt0020_00264	Medtr8g076190		324.57	294.04	313.84	33.36	28.85	26.33	310.817	29.5133	-3.3966	1.76627e-255	3.4244e-252	Z	Belongs to the TRAFAC class myosin-kinesin ATPase superfamily. Kinesin family	-	GO:0000166,GO:0000226,GO:0000278,GO:0000280,GO:0000775,GO:0003674,GO:0003774,GO:0003777,GO:0003824,GO:0005488,GO:0005515,GO:0005524,GO:0005575,GO:0005622,GO:0005623,GO:0005694,GO:0005737,GO:0005856,GO:0005871,GO:0005874,GO:0005875,GO:0005911,GO:0006928,GO:0006996,GO:0007010,GO:0007017,GO:0007018,GO:0007049,GO:0007051,GO:0007052,GO:0008017,GO:0008092,GO:0008144,GO:0008150,GO:0009506,GO:0009987,GO:…	ko:K11498
Mt0002_00814	Medtr2g042050		95.12	93.15	94.06	7.82	6.88	7.15	94.11	7.28333	-3.6917	2.09806e-254	3.85358e-251	G	Belongs to the glycosyl hydrolase 13 family	-	GO:0000272,GO:0003674,GO:0003824,GO:0004553,GO:0004556,GO:0005488,GO:0005509,GO:0005575,GO:0005576,GO:0005622,GO:0005623,GO:0005737,GO:0005829,GO:0005975,GO:0005976,GO:0005982,GO:0005983,GO:0005984,GO:0005985,GO:0005987,GO:0006073,GO:0008150,GO:0008152,GO:0009056,GO:0009057,GO:0009251,GO:0009311,GO:0009313,GO:0009987,GO:0016052,GO:0016160,GO:0016787,GO:0016798,GO:0043167,GO:0043169,GO:0043170,GO:…	ko:K01176
Mt0041_10165	Medtr4g089155		614.96	622.09	591.22	52.51	54.85	46.82	609.423	51.3933	-3.5678	9.28421e-254	1.62e-250	O	Belongs to the peptidase S10 family	-	GO:0003674,GO:0003824,GO:0004180,GO:0004185,GO:0005575,GO:0005576,GO:0005622,GO:0005623,GO:0005737,GO:0005773,GO:0006508,GO:0006807,GO:0008150,GO:0008152,GO:0008233,GO:0008236,GO:0008238,GO:0009056,GO:0009057,GO:0009987,GO:0016787,GO:0017171,GO:0019538,GO:0030163,GO:0043170,GO:0043226,GO:0043227,GO:0043229,GO:0043231,GO:0044237,GO:0044238,GO:0044248,GO:0044257,GO:0044260,GO:0044265,GO:0044267,GO:…	ko:K16297
Mt0013_00323	Medtr3g464210		161.72	164.11	135.22	3.71	4.33	3.3	153.683	3.78	-5.3454	1.1236e-249	1.86721e-246	S	Molybdate transporter	-	GO:0003674,GO:0005215,GO:0005575,GO:0005622,GO:0005623,GO:0005737,GO:0005739,GO:0005740,GO:0005773,GO:0006810,GO:0006811,GO:0006820,GO:0008150,GO:0008509,GO:0015075,GO:0015098,GO:0015103,GO:0015318,GO:0015689,GO:0015698,GO:0016020,GO:0016021,GO:0022857,GO:0031090,GO:0031224,GO:0031966,GO:0031967,GO:0031975,GO:0034220,GO:0043226,GO:0043227,GO:0043229,GO:0043231,GO:0044422,GO:0044424,GO:0044425,GO:…	-
Mt0048_10030	Medtr1g041555	PEPC	2304.98	2034.48	2284.49	271.83	260.22	277.35	2207.98	269.8	-3.0328	3.34616e-248	5.30793e-245	C	Phosphoenolpyruvate carboxylase	PPC1	GO:0003674,GO:0003824,GO:0004611,GO:0005575,GO:0005576,GO:0005622,GO:0005623,GO:0005737,GO:0005829,GO:0006082,GO:0006091,GO:0006099,GO:0006101,GO:0006950,GO:0007154,GO:0007275,GO:0008150,GO:0008152,GO:0008964,GO:0009060,GO:0009267,GO:0009507,GO:0009536,GO:0009605,GO:0009987,GO:0009991,GO:0015977,GO:0015979,GO:0015980,GO:0016036,GO:0016043,GO:0016829,GO:0016830,GO:0016831,GO:0016999,GO:0017144,GO:…	ko:K01595
Mt0009_00137	Medtr8g087710	MtNip1 (Nodulin 26)	1821.49	2048.92	1904.77	116.15	115.73	99.02	1925.06	110.3	-4.1254	1.62635e-247	2.46767e-244	P	Belongs to the MIP aquaporin (TC 1.A.8) family	-	GO:0001666,GO:0003674,GO:0005215,GO:0005342,GO:0005372,GO:0005575,GO:0005622,GO:0005623,GO:0005737,GO:0005783,GO:0005789,GO:0005886,GO:0005887,GO:0006810,GO:0006811,GO:0006820,GO:0006833,GO:0006855,GO:0006950,GO:0008028,GO:0008150,GO:0008509,GO:0008514,GO:0009628,GO:0009877,GO:0012505,GO:0012506,GO:0015075,GO:0015103,GO:0015105,GO:0015129,GO:0015250,GO:0015267,GO:0015318,GO:0015698,GO:0015700,GO:…	ko:K09874
Mt0013_00715	Medtr3g055490	MtCAML4	102.79	85.33	103.67	3.1	3.04	2.34	97.2633	2.82667	-5.1047	5.92852e-245	8.62057e-242	DTZ	Calcium-binding protein	-	GO:0003674,GO:0005488,GO:0005509,GO:0005575,GO:0005622,GO:0005623,GO:0005634,GO:0005737,GO:0006950,GO:0007275,GO:0008150,GO:0009266,GO:0009409,GO:0009628,GO:0009653,GO:0009888,GO:0009987,GO:0010015,GO:0010053,GO:0010054,GO:0016049,GO:0021700,GO:0022622,GO:0030154,GO:0032501,GO:0032502,GO:0040007,GO:0043167,GO:0043169,GO:0043226,GO:0043227,GO:0043229,GO:0043231,GO:0044424,GO:0044464,GO:0046872,GO:…	ko:K02183
Mt0002_10248	Medtr1g013050		729.51	758.75	798.13	58.68	57.1	60.68	762.13	58.82	-3.6957	1.82979e-244	2.55424e-241	E	Aspartate aminotransferase	-	GO:0003674,GO:0003824,GO:0004069,GO:0005488,GO:0005575,GO:0005622,GO:0005623,GO:0005737,GO:0006082,GO:0006103,GO:0006520,GO:0006531,GO:0006536,GO:0006807,GO:0008144,GO:0008150,GO:0008152,GO:0008483,GO:0009058,GO:0009064,GO:0009066,GO:0009501,GO:0009507,GO:0009536,GO:0009987,GO:0016740,GO:0016769,GO:0019752,GO:0019842,GO:0030170,GO:0036094,GO:0043167,GO:0043168,GO:0043226,GO:0043227,GO:0043229,GO:…	ko:K00811
Mt0016_00230	Medtr2g100710		470.63	473.55	510.4	44.69	42.87	38.17	484.86	41.91	-3.5322	1.70816e-239	2.20782e-236	G	Catalyzes the phosphorylation of D-fructose 6-phosphate to fructose 1,6-bisphosphate by ATP, the first committing step of glycolysis	-	-	ko:K00850
Mt0012_00714	Medtr5g032465		86.82	88.84	88.97	3.51	3.47	2.63	88.21	3.20333	-4.7833	1.78065e-236	2.21932e-233	#N/A	#N/A	#N/A	#N/A	#N/A
Mt0050_10147	Medtr6g090485		464.18	466.13	505.09	31.1	32.97	34.32	478.467	32.7967	-3.8668	1.02851e-231	1.23768e-228	#N/A	#N/A	#N/A	#N/A	#N/A
Mt0046_00224	Medtr1g103050		71.71	67.09	64.8	3.1	2.37	2.11	67.8667	2.52667	-4.7474	2.48782e-228	2.894e-225	O	RING-like zinc finger	-	-	-
Mt0007_00481	Medtr3g098350		1.73	0.99	1.49	83.71	77.75	72.98	1.40333	78.1467	5.7993	1.38098e-223	1.55463e-220	PQ	Respiratory burst oxidase homolog protein	-	-	ko:K13447
Mt0002_01497	Medtr1g042310		242.56	230.43	250.12	28.26	28.03	24.77	241.037	27.02	-3.1572	1.63904e-223	1.78748e-220	E	Protein NRT1 PTR FAMILY 5.2-like	-	GO:0001101,GO:0003674,GO:0005215,GO:0005575,GO:0006810,GO:0006857,GO:0006950,GO:0006952,GO:0006970,GO:0006972,GO:0008150,GO:0009605,GO:0009607,GO:0009611,GO:0009617,GO:0009624,GO:0009628,GO:0009651,GO:0009719,GO:0009725,GO:0009737,GO:0009751,GO:0009753,GO:0010033,GO:0010243,GO:0014070,GO:0015833,GO:0016020,GO:0016021,GO:0022857,GO:0031224,GO:0033993,GO:0035672,GO:0035673,GO:0042221,GO:0042493,GO:…	ko:K14638
Mt0010_00186	Medtr5g081000	MtLb1	4573.54	4716.89	4747.79	185.46	194.12	231.63	4679.41	203.737	-4.5215	3.18133e-223	3.3643e-220	C	Belongs to the globin family	-	GO:0003674,GO:0005344,GO:0005488,GO:0006082,GO:0006629,GO:0006631,GO:0006638,GO:0006639,GO:0006641,GO:0006810,GO:0008144,GO:0008150,GO:0008152,GO:0008610,GO:0009058,GO:0009877,GO:0009987,GO:0015669,GO:0015671,GO:0015893,GO:0019432,GO:0019752,GO:0019825,GO:0020037,GO:0032787,GO:0036094,GO:0042221,GO:0042493,GO:0043167,GO:0043169,GO:0043436,GO:0044237,GO:0044238,GO:0044249,GO:0044255,GO:0044281,GO:…	ko:K21893
Mt0003_00086	Medtr4g052380		531.92	488.76	504.57	90.39	91.39	83.88	508.417	88.5533	-2.5214	2.44646e-222	2.51107e-219	E	Bifunctional nitrilase nitrile hydratase	NIT1	GO:0000257,GO:0003674,GO:0003824,GO:0005575,GO:0005623,GO:0005886,GO:0006807,GO:0008150,GO:0008152,GO:0016020,GO:0016787,GO:0016810,GO:0016815,GO:0016829,GO:0016835,GO:0016836,GO:0044464,GO:0047427,GO:0047558,GO:0071944	ko:K01501,ko:K13035
Mt0013_00713	Medtr3g055570	MtCaML1 &3	437.59	441.38	418.83	25.46	30.08	28.53	432.6	28.0233	-3.9483	5.21792e-221	5.20271e-218	T	Calmodulin mediates the control of a large number of enzymes, ion channels and other proteins by Ca(2 ). Among the enzymes to be stimulated by the calmodulin-Ca(2 ) complex are a number of protein kinases and phosphatases	-	-	ko:K02183
Mt0065_00006	Medtr6g043650	NCR069-TC42901	119.66	115.97	135.88	7.99	7.77	7.44	123.837	7.73333	-4.0012	8.69894e-215	7.98883e-212	#N/A	#N/A	#N/A	#N/A	#N/A
Mt0033_00224	Medtr8g012590		289.8	287.21	300.05	37.84	36.08	32.55	292.353	35.49	-3.0422	1.90257e-213	1.70246e-210	Q	Cytochrome p450	-	GO:0003674,GO:0003824,GO:0004497,GO:0005488,GO:0005506,GO:0005575,GO:0006629,GO:0006720,GO:0006721,GO:0006950,GO:0006952,GO:0008150,GO:0008152,GO:0008299,GO:0008610,GO:0009058,GO:0009987,GO:0010035,GO:0010038,GO:0010039,GO:0016020,GO:0016021,GO:0016114,GO:0016491,GO:0016705,GO:0016709,GO:0019748,GO:0020037,GO:0031224,GO:0042214,GO:0042221,GO:0043167,GO:0043169,GO:0044237,GO:0044238,GO:0044249,GO:…	ko:K17961
Mt0006_00008	Medtr3g089005		1975.37	1955.36	2124.14	33.93	47.2	47.92	2018.29	43.0167	-5.5521	4.64724e-213	4.05449e-210	S	Basic blue protein-like	-	GO:0000003,GO:0003006,GO:0003674,GO:0003824,GO:0005488,GO:0005575,GO:0005576,GO:0005623,GO:0005886,GO:0006091,GO:0007275,GO:0008150,GO:0008152,GO:0009055,GO:0009791,GO:0009856,GO:0009908,GO:0009987,GO:0016020,GO:0016491,GO:0022414,GO:0022900,GO:0031012,GO:0031224,GO:0031225,GO:0031226,GO:0032501,GO:0032502,GO:0043167,GO:0043169,GO:0044237,GO:0044421,GO:0044425,GO:0044459,GO:0044464,GO:0044706,GO:…	-
Mt0026_10298	Medtr7g073430		32.85	33.31	32.9	361.71	301.49	324.05	33.02	329.083	3.317	1.46567e-210	1.24754e-207	K	WRKY transcription factor	-	GO:0001101,GO:0002218,GO:0002252,GO:0002253,GO:0002376,GO:0002682,GO:0002684,GO:0003674,GO:0003676,GO:0003677,GO:0003700,GO:0005488,GO:0005575,GO:0005622,GO:0005623,GO:0005634,GO:0006139,GO:0006351,GO:0006355,GO:0006725,GO:0006807,GO:0006950,GO:0006952,GO:0006955,GO:0007154,GO:0007165,GO:0008150,GO:0008152,GO:0009058,GO:0009059,GO:0009605,GO:0009607,GO:0009617,GO:0009620,GO:0009627,GO:0009682,GO:…	-
Mt0008_00192	Medtr5g055900		2.08	1.1	1.66	96.52	84.69	80.09	1.61333	87.1	5.7546	1.26758e-209	1.05324e-206	Q	Belongs to the iron ascorbate-dependent oxidoreductase family	-	GO:0003674,GO:0003824,GO:0005488,GO:0007275,GO:0007568,GO:0008150,GO:0008152,GO:0010150,GO:0016491,GO:0016679,GO:0016682,GO:0032501,GO:0032502,GO:0043167,GO:0043169,GO:0046872,GO:0048366,GO:0048367,GO:0048731,GO:0048827,GO:0048856,GO:0055114,GO:0090693,GO:0099402	-
Mt0071_00033	Medtr1g041915	NCR	90.24	87.01	106.09	2.83	2.34	2.89	94.4467	2.68667	-5.1356	5.80922e-209	4.71465e-206	#N/A	#N/A	#N/A	#N/A	#N/A
Mt0025_10391	Medtr3g031320	NCR	197	208.64	240.31	5.23	5.38	6.63	215.317	5.74667	-5.2276	1.26986e-208	1.00717e-205	#N/A	#N/A	#N/A	#N/A	#N/A
Mt0005_00718	Medtr5g019870		209.24	166.12	207.61	15.51	13.12	12.85	194.323	13.8267	-3.8129	3.21274e-208	2.49152e-205	U	Belongs to the major facilitator superfamily. Sugar transporter (TC 2.A.1.1) family	-	GO:0003674,GO:0005215,GO:0005351,GO:0005355,GO:0005402,GO:0005575,GO:0006810,GO:0006811,GO:0006812,GO:0008150,GO:0008324,GO:0008643,GO:0008645,GO:0015075,GO:0015077,GO:0015078,GO:0015144,GO:0015145,GO:0015149,GO:0015291,GO:0015293,GO:0015294,GO:0015295,GO:0015318,GO:0015672,GO:0015749,GO:0016020,GO:0016021,GO:0022804,GO:0022857,GO:0022890,GO:0031224,GO:0034219,GO:0034220,GO:0044425,GO:0046323,GO:…	-
Mt0012_10297	Medtr7g110180	Mtlb	1334.84	1298.47	1313.94	37.54	44.19	51.94	1315.75	44.5567	-4.8841	2.20052e-206	1.66943e-203	C	Belongs to the globin family	-	GO:0003674,GO:0005344,GO:0005488,GO:0006082,GO:0006629,GO:0006631,GO:0006638,GO:0006639,GO:0006641,GO:0006810,GO:0008144,GO:0008150,GO:0008152,GO:0008610,GO:0009058,GO:0009877,GO:0009987,GO:0015669,GO:0015671,GO:0015893,GO:0019432,GO:0019752,GO:0019825,GO:0020037,GO:0032787,GO:0036094,GO:0042221,GO:0042493,GO:0043167,GO:0043169,GO:0043436,GO:0044237,GO:0044238,GO:0044249,GO:0044255,GO:0044281,GO:…	ko:K21893
Mt0008_10793	Medtr5g069310	MtAS1ne (second-best homolog VfAS1)	5762.52	6602.64	7121.04	405.66	360.73	360.97	6495.4	375.787	-4.1114	6.09038e-206	4.52217e-203	E	Asparagine synthetase	-	GO:0000166,GO:0003674,GO:0003824,GO:0004066,GO:0005488,GO:0005524,GO:0006082,GO:0006520,GO:0006528,GO:0006529,GO:0006541,GO:0006807,GO:0008144,GO:0008150,GO:0008152,GO:0008652,GO:0009058,GO:0009064,GO:0009066,GO:0009067,GO:0009987,GO:0016053,GO:0016874,GO:0016879,GO:0016884,GO:0017076,GO:0017144,GO:0019752,GO:0030554,GO:0032553,GO:0032555,GO:0032559,GO:0032787,GO:0034641,GO:0035639,GO:0036094,GO:…	ko:K01953
Mt0039_00159	Medtr1g088230		97.6	95.49	93.3	5.23	6.42	5.87	95.4633	5.84	-4.0309	3.9744e-205	2.88956e-202	S	Indole-3-acetic acid-induced protein	-	GO:0000302,GO:0001101,GO:0002831,GO:0005575,GO:0005622,GO:0005623,GO:0005634,GO:0005737,GO:0005739,GO:0005829,GO:0006950,GO:0006952,GO:0006970,GO:0006979,GO:0007154,GO:0007275,GO:0007568,GO:0008150,GO:0009266,GO:0009314,GO:0009409,GO:0009414,GO:0009415,GO:0009416,GO:0009605,GO:0009607,GO:0009611,GO:0009620,GO:0009625,GO:0009628,GO:0009636,GO:0009642,GO:0009646,GO:0009651,GO:0009719,GO:0009723,GO:…	-
Mt0001_11183	Medtr4g107630		162.46	154.68	170.72	21.01	19.91	18.78	162.62	19.9	-3.0307	2.96591e-204	2.11234e-201	S	HPP family	-	-	-
Mt0089_00085	Medtr3g118390	PR-3 / CHIB	14.59	11.26	13.04	266.71	292.51	322.98	12.9633	294.067	4.5036	8.78752e-203	6.13333e-200	S	Endochitinase	-	GO:0000272,GO:0001906,GO:0002376,GO:0003674,GO:0003824,GO:0004553,GO:0004568,GO:0005488,GO:0005575,GO:0005622,GO:0005623,GO:0005737,GO:0005773,GO:0005774,GO:0005829,GO:0005975,GO:0005976,GO:0006022,GO:0006026,GO:0006030,GO:0006032,GO:0006040,GO:0006807,GO:0006950,GO:0006952,GO:0006955,GO:0008061,GO:0008144,GO:0008150,GO:0008152,GO:0008219,GO:0009056,GO:0009057,GO:0009605,GO:0009607,GO:0009620,GO:…	ko:K20547
Mt0017_00231	Medtr3g010490	NCR101-TC37320	342.59	295.4	349.11	33.39	31.96	27.14	329.033	30.83	-3.4158	2.32071e-201	1.58801e-198	#N/A	#N/A	#N/A	#N/A	#N/A
Mt0056_00076	Medtr2g044330	NCR238-TC29155	604.11	648.3	735.93	20	20.5	25	662.78	21.8333	-4.9239	2.44796e-200	1.64287e-197	#N/A	#N/A	#N/A	#N/A	#N/A
Mt0001_11759	Medtr4g094492		22.62	21.09	23.89	201.18	181	183.13	22.5333	188.437	3.0639	3.99947e-200	2.63346e-197	C	Belongs to the oxygen-dependent FAD-linked oxidoreductase family	-	-	ko:K22395
Mt0005_10296	Medtr5g010640		2.24	2.67	3.61	158.04	173.07	172.28	2.84	167.797	5.8847	8.67283e-200	5.6049e-197	O	Thaumatin family	-	GO:0001906,GO:0005575,GO:0005576,GO:0006950,GO:0006952,GO:0008150,GO:0009605,GO:0009607,GO:0009620,GO:0031640,GO:0035821,GO:0043207,GO:0044364,GO:0044419,GO:0050832,GO:0050896,GO:0051704,GO:0051707,GO:0098542	-
Mt0013_10121	Medtr3g467600		558.51	478.34	558.97	39.19	44.65	35.71	531.94	39.85	-3.7386	7.63407e-198	4.84389e-195	Q	Belongs to the peroxidase family. Classical plant (class III) peroxidase subfamily	-	-	ko:K00430
Mt0011_10184	Medtr7g090950		141.5	118.49	122.63	18.38	18.25	16.99	127.54	17.8733	-2.8351	6.16415e-197	3.84136e-194	K	carbonic anhydrase	-	GO:0003674,GO:0003824,GO:0004089,GO:0005488,GO:0005575,GO:0005622,GO:0005623,GO:0005737,GO:0008270,GO:0009507,GO:0009532,GO:0009534,GO:0009535,GO:0009536,GO:0009570,GO:0009579,GO:0016020,GO:0016829,GO:0016835,GO:0016836,GO:0031976,GO:0031984,GO:0034357,GO:0042651,GO:0043167,GO:0043169,GO:0043226,GO:0043227,GO:0043229,GO:0043231,GO:0044422,GO:0044424,GO:0044434,GO:0044435,GO:0044436,GO:0044444,GO:…	ko:K01674
Mt0069_10023	Medtr3g005750		93.35	82.88	88.52	5.7	4.27	3.76	88.25	4.57667	-4.2692	1.19467e-195	7.31429e-193	B	Belongs to the class I-like SAM-binding methyltransferase superfamily. C5-methyltransferase family	-	GO:0003674,GO:0003676,GO:0003677,GO:0003682,GO:0003824,GO:0003886,GO:0005488,GO:0005575,GO:0005622,GO:0005623,GO:0005634,GO:0006139,GO:0006259,GO:0006304,GO:0006305,GO:0006306,GO:0006325,GO:0006351,GO:0006355,GO:0006725,GO:0006807,GO:0006950,GO:0006996,GO:0008150,GO:0008152,GO:0008168,GO:0008757,GO:0009008,GO:0009058,GO:0009059,GO:0009266,GO:0009408,GO:0009628,GO:0009889,GO:0009987,GO:0010426,GO:…	ko:K00558
Mt0013_10547	Medtr3g460850		111.68	109.68	98.57	9.54	10.2	9.06	106.643	9.6	-3.4736	9.97929e-194	6.00443e-191	#N/A	#N/A	#N/A	#N/A	#N/A
Mt0002_00002	Medtr1g004990		1160.42	1164.3	1201.57	90.55	84.48	66.03	1175.43	80.3533	-3.8707	3.8143e-193	2.25613e-190	T	Belongs to the protein kinase superfamily	-	-	ko:K08959,ko:K08960
Mt0003_01524	Medtr4g086020		310.1	338.5	320.78	29.11	30.15	30.04	323.127	29.7667	-3.4403	2.17785e-192	1.26671e-189	P	Ferredoxin-nitrite reductase	NIR	GO:0001101,GO:0003674,GO:0003824,GO:0005488,GO:0005575,GO:0005576,GO:0005622,GO:0005623,GO:0005737,GO:0005739,GO:0006082,GO:0006807,GO:0008150,GO:0008152,GO:0009507,GO:0009532,GO:0009536,GO:0009570,GO:0009987,GO:0010035,GO:0010167,GO:0016020,GO:0016491,GO:0016661,GO:0016662,GO:0016664,GO:0020037,GO:0042126,GO:0042128,GO:0042221,GO:0043167,GO:0043169,GO:0043226,GO:0043227,GO:0043229,GO:0043231,GO:…	ko:K00366
Mt0013_00721	Medtr3g055440	MtNOD25	16036.7	17080.9	17970.6	1412.18	1461.58	1517.7	17029.4	1463.82	-3.5402	2.2783e-192	1.30341e-189	#N/A	#N/A	#N/A	#N/A	#N/A
Mt0001_11797	Medtr4g094342		106.49	112.89	123.57	6.91	6.98	7.09	114.317	6.99333	-4.0309	1.20913e-190	6.80586e-188	S	WAT1-related protein	-	-	-
Mt0034_10149	Medtr8g467170	NCR104-TC38808	233.55	260.23	273.87	10.35	8.05	10.76	255.883	9.72	-4.7184	1.62654e-190	9.01e-188	#N/A	#N/A	#N/A	#N/A	#N/A
Mt0006_00443	Medtr3g079850		697.34	656.02	717.35	107.35	106.54	94.42	690.237	102.77	-2.7477	3.91825e-190	2.13655e-187	T	Cysteine-rich receptor-like protein kinase	-	-	-
Mt0024_10162	Medtr6g086170	SST1 Sulfate transporter	2122.22	2242.5	2490.34	151.7	154.75	167.39	2285.02	157.947	-3.8547	2.85751e-189	1.53418e-186	P	Sulfate transporter	-	GO:0003674,GO:0005215,GO:0005575,GO:0005623,GO:0005886,GO:0005887,GO:0006810,GO:0006811,GO:0006820,GO:0008150,GO:0008271,GO:0008272,GO:0008509,GO:0015075,GO:0015103,GO:0015116,GO:0015291,GO:0015293,GO:0015318,GO:0015698,GO:0016020,GO:0016021,GO:0022804,GO:0022857,GO:0031224,GO:0031226,GO:0034220,GO:0044425,GO:0044459,GO:0044464,GO:0051179,GO:0051234,GO:0055085,GO:0071944,GO:0072348,GO:0098656,GO:…	ko:K17471
Mt0002_10801	Medtr1g027050		5.07	5.78	5.58	107.55	121.81	109.35	5.47667	112.903	4.3656	1.22194e-187	6.46112e-185	T	receptor-like protein kinase	-	-	-
Mt0080_00034	Medtr7g037690	NCR	62.15	54.29	68.93	2.19	1.87	2.08	61.79	2.04667	-4.916	6.75457e-187	3.51822e-184	#N/A	#N/A	#N/A	#N/A	#N/A
Mt0019_10258	Medtr2g084745	NCR	132.25	148.58	167.84	4.89	4.36	5.35	149.557	4.86667	-4.9416	1.89596e-186	9.73015e-184	#N/A	#N/A	#N/A	#N/A	#N/A
Mt0036_00102	Medtr7g113490		172.34	171.32	175.89	14.6	12.2	10.33	173.183	12.3767	-3.8066	2.38503e-186	1.20627e-183	T	Mitogen-activated protein kinase kinase kinase	-	GO:0000165,GO:0000166,GO:0000186,GO:0000226,GO:0001932,GO:0001934,GO:0003674,GO:0003824,GO:0004672,GO:0004674,GO:0004709,GO:0005488,GO:0005524,GO:0005575,GO:0005622,GO:0005623,GO:0005737,GO:0005856,GO:0005874,GO:0006464,GO:0006468,GO:0006793,GO:0006796,GO:0006807,GO:0006950,GO:0006979,GO:0006996,GO:0007010,GO:0007017,GO:0007154,GO:0007165,GO:0007346,GO:0008144,GO:0008150,GO:0008152,GO:0009893,GO:…	ko:K20606
Mt0004_00520	Medtr1g061110	NCR	71.16	70.19	81.55	4.25	3.56	3.44	74.3	3.75	-4.3084	2.73741e-186	1.36472e-183	#N/A	#N/A	#N/A	#N/A	#N/A
Mt0047_10103	Medtr2g048885	NCR	99.76	105.77	115.63	6.37	5.78	6.54	107.053	6.23	-4.103	5.29862e-186	2.60438e-183	#N/A	#N/A	#N/A	#N/A	#N/A
Mt0213_00004	Medtr0111s0050		76.16	81.71	88.03	4.38	3.41	3.7	81.9667	3.83	-4.4196	6.5804e-184	3.14579e-181	#N/A	#N/A	#N/A	#N/A	#N/A
Mt0010_00934	Medtr5g095595	NCR	71.2	62.04	75.1	5.23	5.22	4.8	69.4467	5.08333	-3.7721	4.80919e-181	2.23775e-178	#N/A	#N/A	#N/A	#N/A	#N/A
Mt0041_00068	Medtr6g015865		159.71	153.29	148.6	29.71	27.23	27.66	153.867	28.2	-2.4479	1.9754e-180	9.07071e-178	S	COBRA-like protein 1	-	-	-
Mt0004_10502	Medtr1g059940		418.32	468.21	456.97	35.55	38.26	32.84	447.833	35.55	-3.655	2.12752e-180	9.64236e-178	P	Bifunctional monodehydroascorbate reductase and carbonic anhydrase	-	GO:0003674,GO:0003824,GO:0004089,GO:0005488,GO:0005575,GO:0005622,GO:0005623,GO:0005737,GO:0005783,GO:0008270,GO:0009507,GO:0009532,GO:0009536,GO:0009570,GO:0012505,GO:0016829,GO:0016835,GO:0016836,GO:0043167,GO:0043169,GO:0043226,GO:0043227,GO:0043229,GO:0043231,GO:0044422,GO:0044424,GO:0044434,GO:0044435,GO:0044444,GO:0044446,GO:0044464,GO:0046872,GO:0046914	ko:K01674
Mt0031_10019	Medtr7g098180		287.99	303.07	300.95	40.03	37.7	39.58	297.337	39.1033	-2.9267	9.66175e-175	4.26805e-172	E	Peptide transporter	-	-	ko:K14638
Mt0006_00551	Medtr3g077630		6.73	6.07	5.79	131.8	163.82	161.23	6.19667	152.283	4.6191	2.54671e-174	1.09722e-171	S	isoform X1	-	-	-
Mt0034_00253	Medtr8g464730	NCR	163.68	159.11	191.42	11.74	9.03	8.88	171.403	9.88333	-4.1163	4.01542e-173	1.68832e-170	#N/A	#N/A	#N/A	#N/A	#N/A
Mt0012_10515	Medtr5g036270		69.55	55.9	76	0.57	0.68	0.52	67.15	0.59	-6.8305	6.27519e-171	2.60704e-168	O	Belongs to the peptidase M10A family	-	-	-
Mt0044_10207	Medtr7g031915	NCR	133.04	111.69	151.72	4.86	4.86	5.82	132.15	5.18	-4.6731	6.42697e-170	2.63869e-167	#N/A	#N/A	#N/A	#N/A	#N/A
Mt0001_11660	Medtr4g094882		204.71	186.89	192.88	44.11	38.69	38.05	194.827	40.2833	-2.2739	1.33565e-168	5.29676e-166	Z	Belongs to the TRAFAC class myosin-kinesin ATPase superfamily. Kinesin family	-	GO:0000022,GO:0000070,GO:0000166,GO:0000226,GO:0000278,GO:0000280,GO:0000281,GO:0000819,GO:0000910,GO:0002376,GO:0002478,GO:0002495,GO:0002504,GO:0003674,GO:0003676,GO:0003677,GO:0003774,GO:0003777,GO:0003824,GO:0005488,GO:0005515,GO:0005524,GO:0005575,GO:0005576,GO:0005622,GO:0005623,GO:0005634,GO:0005654,GO:0005694,GO:0005737,GO:0005819,GO:0005829,GO:0005856,GO:0005871,GO:0005874,GO:0005875,GO:…	ko:K10395
Mt0002_11840	Medtr1g049330	MtLB29	1858.94	1765.84	1759.08	169.17	201.37	187.62	1794.62	186.053	-3.2699	5.8352e-167	2.28805e-164	C	Belongs to the globin family	-	GO:0003674,GO:0005344,GO:0005488,GO:0006082,GO:0006629,GO:0006631,GO:0006638,GO:0006639,GO:0006641,GO:0006810,GO:0008144,GO:0008150,GO:0008152,GO:0008610,GO:0009058,GO:0009877,GO:0009987,GO:0015669,GO:0015671,GO:0015893,GO:0019432,GO:0019752,GO:0019825,GO:0020037,GO:0032787,GO:0036094,GO:0042221,GO:0042493,GO:0043167,GO:0043169,GO:0043436,GO:0044237,GO:0044238,GO:0044249,GO:0044255,GO:0044281,GO:…	ko:K21893
Mt0002_10287	Medtr1g013760		1.06	0.48	0.45	118.01	90.38	88.8	0.663333	99.0633	7.2225	8.36021e-167	3.24172e-164	K	WRKY Transcription Factor	-	-	-
Mt0016_10121	Medtr2g103330		292.51	259.57	285.07	59.93	59.46	57.73	279.05	59.04	-2.2408	1.81709e-164	6.96843e-162	S	Embryo-specific protein 3, (ATS3)	-	-	-
Mt0039_00029	Medtr1g090810	Lb	226.66	266.81	282.74	11.7	12.75	13.37	258.737	12.6067	-4.3592	3.30899e-164	1.25519e-161	C	Belongs to the globin family	-	GO:0003674,GO:0005344,GO:0005488,GO:0006082,GO:0006629,GO:0006631,GO:0006638,GO:0006639,GO:0006641,GO:0006810,GO:0008144,GO:0008150,GO:0008152,GO:0008610,GO:0009058,GO:0009987,GO:0015669,GO:0015671,GO:0015893,GO:0019432,GO:0019752,GO:0019825,GO:0020037,GO:0032787,GO:0036094,GO:0042221,GO:0042493,GO:0043167,GO:0043169,GO:0043436,GO:0044237,GO:0044238,GO:0044249,GO:0044255,GO:0044281,GO:0045017,GO:…	ko:K21893
Mt0029_00145	Medtr4g120970		1.14	0.4	0.55	92.58	73.72	78.21	0.696667	81.5033	6.8702	1.52598e-163	5.72619e-161	S	Major allergen Pru	-	-	-
Mt0031_10043	Medtr7g098320		5	6.62	5.51	198.51	232.84	260.8	5.71	230.717	5.3365	6.94602e-161	2.57875e-158	Q	Belongs to the ABC transporter superfamily. ABCG family. PDR (TC 3.A.1.205) subfamily	-	GO:0000166,GO:0000302,GO:0001101,GO:0002229,GO:0002239,GO:0003674,GO:0003824,GO:0005215,GO:0005488,GO:0005524,GO:0005575,GO:0005623,GO:0005886,GO:0006810,GO:0006811,GO:0006812,GO:0006820,GO:0006855,GO:0006869,GO:0006950,GO:0006952,GO:0006979,GO:0008144,GO:0008150,GO:0009605,GO:0009607,GO:0009719,GO:0009723,GO:0009725,GO:0009751,GO:0009753,GO:0010033,GO:0010035,GO:0010193,GO:0010876,GO:0014070,GO:…	-
Mt0011_00137	Medtr7g092230		152.35	145.14	144.61	32.55	31.41	29.72	147.367	31.2267	-2.2386	5.99119e-160	2.20085e-157	T	oligopeptide transporter	-	GO:0003674,GO:0005215,GO:0005575,GO:0005623,GO:0005886,GO:0005887,GO:0006810,GO:0006857,GO:0008104,GO:0008150,GO:0015031,GO:0015833,GO:0016020,GO:0016021,GO:0022857,GO:0031224,GO:0031226,GO:0033036,GO:0035672,GO:0035673,GO:0042886,GO:0042887,GO:0044425,GO:0044459,GO:0044464,GO:0045184,GO:0051179,GO:0051234,GO:0055085,GO:0071702,GO:0071705,GO:0071944,GO:1904680	-
Mt0097_00055	Medtr4g019225		1.42	1.13	2.15	106.27	120.58	130.64	1.56667	119.163	6.2491	1.491e-159	5.4201e-157	Q	Belongs to the multicopper oxidase family	-	GO:0000003,GO:0003006,GO:0003674,GO:0003824,GO:0005488,GO:0005507,GO:0005575,GO:0005576,GO:0006725,GO:0007275,GO:0008150,GO:0008152,GO:0009056,GO:0009698,GO:0009791,GO:0009808,GO:0009987,GO:0010035,GO:0010038,GO:0010228,GO:0016491,GO:0016679,GO:0016682,GO:0016722,GO:0019439,GO:0019748,GO:0022414,GO:0032501,GO:0032502,GO:0042221,GO:0043167,GO:0043169,GO:0044237,GO:0044248,GO:0046271,GO:0046274,GO:…	ko:K05909
Mt0050_10137	Medtr1g053640	NCR	187.76	183.45	244.29	8.77	7.87	9.43	205.167	8.69	-4.5613	1.0618e-158	3.82007e-156	#N/A	#N/A	#N/A	#N/A	#N/A
Mt0008_00261	Medtr5g057460	NCR	61.56	56.63	65.63	5.56	5.38	5.87	61.2733	5.60333	-3.4509	1.80132e-156	6.41453e-154	#N/A	#N/A	#N/A	#N/A	#N/A
Mt0013_00052	Medtr3g449640	NCR	133.47	155.74	183.17	5.77	6.36	5.32	157.46	5.81667	-4.7586	5.20954e-154	1.83639e-151	#N/A	#N/A	#N/A	#N/A	#N/A
Mt0013_00712	Medtr3g055585	MtCaML2	932.5	927.1	766.9	31.16	44.07	36.02	875.5	37.0833	-4.5613	4.98753e-153	1.70642e-150	#N/A	#N/A	#N/A	#N/A	#N/A
Mt0043_10016	Medtr7g096870		157.43	161.59	151.9	26.48	24.12	22.4	156.973	24.3333	-2.6895	5.63906e-152	1.89223e-149	P	Inorganic phosphate transporter	-	GO:0001101,GO:0003674,GO:0005215,GO:0005315,GO:0005575,GO:0005622,GO:0005623,GO:0005634,GO:0005737,GO:0005773,GO:0005794,GO:0005886,GO:0005887,GO:0005911,GO:0006810,GO:0006811,GO:0006817,GO:0006820,GO:0008150,GO:0008509,GO:0009506,GO:0009719,GO:0009725,GO:0009737,GO:0010033,GO:0012505,GO:0015075,GO:0015291,GO:0015293,GO:0015318,GO:0015698,GO:0016020,GO:0016021,GO:0022804,GO:0022857,GO:0030054,GO:…	ko:K08176
Mt0024_10009	Medtr6g081390		60.7	64.23	56.69	5.56	5.68	5.44	60.54	5.56	-3.4447	4.58434e-151	1.52366e-148	V	Belongs to the multi antimicrobial extrusion (MATE) (TC 2.A.66.1) family	-	GO:0003674,GO:0005215,GO:0005575,GO:0005622,GO:0005623,GO:0005737,GO:0005773,GO:0005774,GO:0006810,GO:0006855,GO:0008150,GO:0009605,GO:0009607,GO:0009624,GO:0015238,GO:0015291,GO:0015297,GO:0015893,GO:0016020,GO:0016021,GO:0022804,GO:0022857,GO:0031090,GO:0031224,GO:0042221,GO:0042493,GO:0043207,GO:0043226,GO:0043227,GO:0043229,GO:0043231,GO:0044422,GO:0044424,GO:0044425,GO:0044437,GO:0044444,GO:…	ko:K03327
Mt0433_10001	Medtr0693s0050		557.92	598.76	552.94	24.76	21.94	14.55	569.873	20.4167	-4.8028	2.22921e-150	7.33916e-148	S	Myb/SANT-like DNA-binding domain	-	-	-
Mt0002_10177	Medtr5g080900	MtLb1	1531.29	1519.07	1496.45	47.66	69.17	65.89	1515.6	60.9067	-4.6371	2.74581e-150	8.95546e-148	C	Belongs to the globin family	-	GO:0003674,GO:0005344,GO:0005488,GO:0006082,GO:0006629,GO:0006631,GO:0006638,GO:0006639,GO:0006641,GO:0006810,GO:0008144,GO:0008150,GO:0008152,GO:0008610,GO:0009058,GO:0009877,GO:0009987,GO:0015669,GO:0015671,GO:0015893,GO:0019432,GO:0019752,GO:0019825,GO:0020037,GO:0032787,GO:0036094,GO:0042221,GO:0042493,GO:0043167,GO:0043169,GO:0043436,GO:0044237,GO:0044238,GO:0044249,GO:0044255,GO:0044281,GO:…	ko:K21893
Mt0052_10175	Medtr6g080440		0.83	0.77	1.53	76.46	84.51	87.99	1.04333	82.9867	6.3136	1.64186e-149	5.30534e-147	O	glutathione S-transferase	-	-	ko:K00799
Mt0063_00044	Medtr5g076255		95.12	79.7	112.75	3.2	3.41	3.91	95.8567	3.50667	-4.7727	1.77017e-149	5.66746e-147	#N/A	#N/A	#N/A	#N/A	#N/A
Mt0036_00184	Medtr7g114890	NCR240-TC34386	301.13	268.2	277.37	72.44	72.49	69.5	282.233	71.4767	-1.9813	3.50419e-149	1.11172e-146	-	-	-	-	-
Mt0044_00166	Medtr7g032920	NCR	148.89	176.51	189.37	7.99	6.67	8.56	171.59	7.74	-4.4705	1.51888e-148	4.7753e-146	#N/A	#N/A	#N/A	#N/A	#N/A
Mt0017_00075	Medtr3g006650	NCR	123.72	142.43	172.49	3.47	4.36	4.4	146.213	4.07667	-5.1645	1.11579e-146	3.47668e-144	#N/A	#N/A	#N/A	#N/A	#N/A
Mt0008_00952	Medtr7g046115	NCR	61.21	63.32	64.28	3.41	3.96	4.43	62.9367	3.93333	-4.0001	1.53613e-146	4.74407e-144	#N/A	#N/A	#N/A	#N/A	#N/A
Mt0006_10270	Medtr3g084820	NCR	1064.79	1085.15	1263.8	61.95	73.6	76.65	1137.91	70.7333	-4.0079	4.91001e-146	1.50307e-143	#N/A	#N/A	#N/A	#N/A	#N/A
Mt0011_10203	Medtr7g090570		77.49	61.09	72.01	8.26	8.3	8.3	70.1967	8.28667	-3.0825	1.32135e-145	3.97523e-143	#N/A	#N/A	#N/A	#N/A	#N/A
Mt0026_00227	Medtr7g071840		52.95	65.4	65.53	1.59	1.17	1.65	61.2933	1.47	-5.3818	6.4049e-145	1.91041e-142	S	Wound-induced protein	-	-	-
Mt0015_00069	Medtr8g006775		152.31	156.91	167.12	23.41	22.37	22.86	158.78	22.88	-2.7949	2.97415e-144	8.79593e-142	S	Encoded by	-	-	-
Mt0154_10015	Medtr0003s0130	NCR	221.71	221.22	264.23	13.69	15.49	16.7	235.72	15.2933	-3.9461	4.21422e-144	1.23586e-141	#N/A	#N/A	#N/A	#N/A	#N/A
Mt0011_00592	Medtr7g082810		151.25	160.68	160.98	24.22	21.66	20.69	157.637	22.19	-2.8286	6.37003e-144	1.85251e-141	V	Belongs to the multi antimicrobial extrusion (MATE) (TC 2.A.66.1) family	-	-	ko:K03327
Mt0039_00027	Medtr1g090820		1594.55	1587.69	1592	187.89	218.7	203.97	1591.41	203.52	-2.9671	1.2957e-142	3.73698e-140	C	Belongs to the globin family	-	GO:0003674,GO:0005344,GO:0005488,GO:0006082,GO:0006629,GO:0006631,GO:0006638,GO:0006639,GO:0006641,GO:0006810,GO:0008144,GO:0008150,GO:0008152,GO:0008610,GO:0009058,GO:0009877,GO:0009987,GO:0015669,GO:0015671,GO:0015893,GO:0019432,GO:0019752,GO:0019825,GO:0020037,GO:0032787,GO:0036094,GO:0042221,GO:0042493,GO:0043167,GO:0043169,GO:0043436,GO:0044237,GO:0044238,GO:0044249,GO:0044255,GO:0044281,GO:…	ko:K21893
Mt0011_00807	Medtr7g078060		153.3	157.31	162.99	27.49	25.44	24.07	157.867	25.6667	-2.6207	3.63025e-142	1.03843e-139	S	O-acyltransferase (WSD1-like)	-	-	-
Mt0028_10329	Medtr1g036710		39.49	37.47	35.36	2.16	2.43	1.62	37.44	2.07	-4.1769	1.42883e-141	4.02123e-139	S	ribonuclease H protein	-	-	-
Mt0024_00349	Medtr6g091600	NCR	509.42	490.62	587.64	45.13	49.75	51.33	529.227	48.7367	-3.4408	3.5265e-141	9.84542e-139	#N/A	#N/A	#N/A	#N/A	#N/A
Mt0014_10109	Medtr4g033830	NCR	140.36	170.99	197.56	5.43	6.05	6.42	169.637	5.96667	-4.8294	3.69009e-141	1.02204e-138	#N/A	#N/A	#N/A	#N/A	#N/A
Mt0008_00899	Medtr5g072455	NCR100-TC32805	56.88	62.11	72.74	1.15	1.63	1.71	63.91	1.49667	-5.4162	7.93563e-141	2.16358e-138	#N/A	#N/A	#N/A	#N/A	#N/A
Mt0028_10098	Medtr8g018690		18.65	22.15	17.2	261.82	267.28	238.46	19.3333	255.853	3.7262	1.03392e-140	2.79704e-138	E	Plant lipoxygenase may be involved in a number of diverse aspects of plant physiology including growth and development, pest resistance, and senescence or responses to wounding	LOX2	-	ko:K00454,ko:K15718
Mt0047_00068	Medtr2g047848		108.61	102.04	104.95	24.82	23.08	21.93	105.2	23.2767	-2.1762	1.89408e-140	5.08459e-138	S	F-box FBD LRR-repeat protein	-	-	-
Mt0081_00028	Medtr5g048550		15.77	13.49	16.95	167.79	152.51	177.87	15.4033	166.057	3.4304	8.01853e-140	2.13611e-137	Q	Belongs to the iron ascorbate-dependent oxidoreductase family	-	GO:0003674,GO:0003824,GO:0005488,GO:0007275,GO:0007568,GO:0008150,GO:0008152,GO:0010150,GO:0016491,GO:0016679,GO:0016682,GO:0032501,GO:0032502,GO:0043167,GO:0043169,GO:0046872,GO:0048366,GO:0048367,GO:0048731,GO:0048827,GO:0048856,GO:0055114,GO:0090693,GO:0099402	-
Mt0035_00113	Medtr7g022640		64.24	50.74	62.69	5.83	5.75	4.95	59.2233	5.51	-3.426	2.14264e-139	5.66467e-137	#N/A	#N/A	#N/A	#N/A	#N/A
Mt0008_10876	Medtr5g073020		370.28	373.74	439.04	43.98	40.16	44.36	394.353	42.8333	-3.2027	5.60292e-139	1.47016e-136	Q	Belongs to the cytochrome P450 family	-	GO:0003674,GO:0003824,GO:0004497,GO:0005488,GO:0005506,GO:0005575,GO:0005622,GO:0005623,GO:0005737,GO:0005783,GO:0005789,GO:0006807,GO:0006950,GO:0008150,GO:0008152,GO:0009058,GO:0009266,GO:0009408,GO:0009628,GO:0009987,GO:0010132,GO:0010286,GO:0012505,GO:0016020,GO:0016021,GO:0016137,GO:0016138,GO:0016491,GO:0016705,GO:0016709,GO:0019748,GO:0019756,GO:0020037,GO:0031224,GO:0031984,GO:0034641,GO:…	ko:K00512,ko:K13029
Mt0004_10106	Medtr3g106270		254.2	184.81	251.33	16.19	13.24	16.55	230.113	15.3267	-3.9082	7.03608e-139	1.83243e-136	T	Belongs to the protein kinase superfamily	-	GO:0000166,GO:0003674,GO:0003824,GO:0004672,GO:0004674,GO:0004683,GO:0005488,GO:0005515,GO:0005516,GO:0005524,GO:0005575,GO:0005622,GO:0005623,GO:0005634,GO:0005737,GO:0006464,GO:0006468,GO:0006793,GO:0006796,GO:0006807,GO:0006950,GO:0007154,GO:0007165,GO:0008144,GO:0008150,GO:0008152,GO:0009267,GO:0009314,GO:0009416,GO:0009605,GO:0009628,GO:0009636,GO:0009931,GO:0009987,GO:0009991,GO:0010033,GO:…	ko:K04515,ko:K08794
Mt0020_00191	Medtr8g074890		78.09	73.63	78.74	14.06	13.55	12.27	76.82	13.2933	-2.5308	1.18303e-138	3.05818e-136	E	prolyl 4-hydroxylase	-	GO:0000139,GO:0003674,GO:0003824,GO:0004656,GO:0005488,GO:0005506,GO:0005515,GO:0005575,GO:0005622,GO:0005623,GO:0005737,GO:0005739,GO:0005783,GO:0005788,GO:0005789,GO:0005794,GO:0006082,GO:0006464,GO:0006520,GO:0006575,GO:0006807,GO:0007275,GO:0008150,GO:0008152,GO:0009653,GO:0009888,GO:0009987,GO:0010015,GO:0010053,GO:0010054,GO:0012505,GO:0016020,GO:0016021,GO:0016043,GO:0016222,GO:0016491,GO:…	ko:K00472
Mt0011_00681	Medtr7g080940		113.41	112.57	128.94	9.78	11.55	9.9	118.307	10.41	-3.5065	4.95654e-138	1.27186e-135	CG	Belongs to the UDP-glycosyltransferase family	-	GO:0000302,GO:0001101,GO:0003674,GO:0003824,GO:0005575,GO:0005622,GO:0005623,GO:0005737,GO:0005829,GO:0006082,GO:0006520,GO:0006725,GO:0006807,GO:0006950,GO:0006970,GO:0006972,GO:0006979,GO:0007154,GO:0007275,GO:0008150,GO:0008152,GO:0008194,GO:0009072,GO:0009414,GO:0009415,GO:0009605,GO:0009628,GO:0009636,GO:0009651,GO:0009653,GO:0009696,GO:0009719,GO:0009725,GO:0009737,GO:0009850,GO:0009987,GO:…	ko:K11820,ko:K13691,ko:K21374
Mt0130_10020	Medtr0003s0180		593.56	709.39	774.04	29.81	34.05	36.89	692.33	33.5833	-4.3656	7.6045e-138	1.93709e-135	#N/A	#N/A	#N/A	#N/A	#N/A
Mt0006_00214	Medtr3g084910	NCR193-TC34601	224.77	232.59	300.25	8.7	7.65	10.68	252.537	9.01	-4.8088	2.91936e-137	7.38259e-135	#N/A	#N/A	#N/A	#N/A	#N/A
Mt0005_00131	Medtr5g007717		45.67	47.97	51.9	465.83	510.6	433.22	48.5133	469.883	3.2758	1.61477e-136	4.05411e-134	H	Belongs to the chalcone stilbene synthases family	CHS3	GO:0003674,GO:0003824,GO:0008150,GO:0008152,GO:0009058,GO:0009812,GO:0009813,GO:0016210,GO:0016740,GO:0016746,GO:0016747,GO:0071704,GO:1901576	ko:K00660
Mt0003_00621	Medtr1579s0020		5.86	7.46	7.45	146.78	168.3	181.02	6.92333	165.367	4.5781	4.19813e-136	1.04647e-133	Q	Tropinone reductase homolog At1g07440-like	-	GO:0003674,GO:0003824,GO:0008150,GO:0008152,GO:0016491,GO:0055114	ko:K08081
Mt0010_10133	Medtr5g080400		1244.95	1313.64	1473.98	39.8	51.2	59.17	1344.19	50.0567	-4.747	5.61811e-136	1.3905e-133	C	Belongs to the globin family	-	GO:0003674,GO:0005344,GO:0005488,GO:0006082,GO:0006629,GO:0006631,GO:0006638,GO:0006639,GO:0006641,GO:0006810,GO:0008144,GO:0008150,GO:0008152,GO:0008610,GO:0009058,GO:0009877,GO:0009987,GO:0015669,GO:0015671,GO:0015893,GO:0019432,GO:0019752,GO:0019825,GO:0020037,GO:0032787,GO:0036094,GO:0042221,GO:0042493,GO:0043167,GO:0043169,GO:0043436,GO:0044237,GO:0044238,GO:0044249,GO:0044255,GO:0044281,GO:…	ko:K21893
Mt0013_10465	Medtr3g061750	NCR	89.53	107.48	116.7	1.72	1.81	2.75	104.57	2.09333	-5.6425	6.71832e-135	1.6511e-132	#N/A	#N/A	#N/A	#N/A	#N/A
Mt0139_10026	Medtr1g055035	NCR	73.68	95.68	101.52	2.6	2.86	3.01	90.2933	2.82333	-4.9991	7.9927e-135	1.95055e-132	#N/A	#N/A	#N/A	#N/A	#N/A
Mt0012_10601	Medtr5g034590		538.06	520.46	571.76	116.69	107.61	101.19	543.427	108.497	-2.3244	8.20395e-135	1.9882e-132	P	Potassium transporter	-	-	ko:K03549
Mt0048_00058	Medtr2g076010		165.45	160.64	167.05	22.39	24.8	24.77	164.38	23.9867	-2.7767	2.97875e-134	7.16913e-132	S	Pathogen-related	-	-	-
Mt0014_00055	Medtr6g462060	NCR	261.52	268.42	326.53	27.32	24.8	26.77	285.49	26.2967	-3.4405	6.65586e-134	1.58641e-131	#N/A	#N/A	#N/A	#N/A	#N/A
Mt0013_10763	Medtr3g053600	NCR302-TC35342	70.73	86.86	95.8	3.81	3.35	3.67	84.4633	3.61	-4.5483	6.68238e-134	1.58641e-131	#N/A	#N/A	#N/A	#N/A	#N/A
Mt0010_10239	Medtr5g082480		124.62	107.37	126.9	14.27	14.07	11.05	119.63	13.13	-3.1876	2.14216e-133	5.05115e-131	#N/A	#N/A	#N/A	#N/A	#N/A
Mt0054_10186	Medtr6g461840	NCR	123.17	140.97	166.56	4.55	4.64	5.99	143.567	5.06	-4.8264	9.79116e-133	2.29323e-130	#N/A	#N/A	#N/A	#N/A	#N/A
Mt0011_10569	Medtr7g082820		99.01	94.1	95.52	19.59	18.35	16.2	96.21	18.0467	-2.4145	1.69369e-132	3.94043e-130	K	high mobility group	-	GO:0000785,GO:0003674,GO:0003676,GO:0003677,GO:0003682,GO:0003700,GO:0005198,GO:0005488,GO:0005575,GO:0005622,GO:0005623,GO:0005634,GO:0005694,GO:0005737,GO:0005829,GO:0006325,GO:0006333,GO:0006355,GO:0006996,GO:0008150,GO:0009889,GO:0009987,GO:0010468,GO:0010556,GO:0016043,GO:0019219,GO:0019222,GO:0030527,GO:0031323,GO:0031326,GO:0043226,GO:0043227,GO:0043228,GO:0043229,GO:0043231,GO:0043232,GO:…	ko:K10802,ko:K11296
Mt0035_10081	Medtr7g021850		3.89	2.6	3.33	53.22	59.31	58.59	3.27333	57.04	4.1231	6.74995e-132	1.56e-129	C	reductase	-	GO:0003674,GO:0003824,GO:0008150,GO:0008152,GO:0016491,GO:0055114	-
Mt0010_01019	Medtr5g097010		175.52	161.74	132.2	8.94	10.33	7.09	156.487	8.78667	-4.1546	7.72666e-132	1.77398e-129	M	This protein plays a role in synthesis of starch. It catalyzes the synthesis of the activated glycosyl donor, ADP- glucose from Glc-1-P and ATP	-	GO:0000166,GO:0000271,GO:0003674,GO:0003824,GO:0005488,GO:0005524,GO:0005575,GO:0005622,GO:0005623,GO:0005737,GO:0005975,GO:0005976,GO:0005977,GO:0005978,GO:0005982,GO:0006073,GO:0006091,GO:0006112,GO:0008144,GO:0008150,GO:0008152,GO:0008878,GO:0009058,GO:0009059,GO:0009250,GO:0009501,GO:0009507,GO:0009536,GO:0009987,GO:0015980,GO:0016051,GO:0016740,GO:0016772,GO:0016779,GO:0017076,GO:0019252,GO:…	ko:K00975
Mt0013_10211	Medtr3g466180		4.92	4.61	5.86	66.98	71.85	62.01	5.13	66.9467	3.706	1.38894e-131	3.16806e-129	Q	Belongs to the peroxidase family. Classical plant (class III) peroxidase subfamily	-	GO:0003674,GO:0003824,GO:0004601,GO:0005488,GO:0005575,GO:0005576,GO:0005618,GO:0005622,GO:0005623,GO:0005737,GO:0005794,GO:0005829,GO:0006725,GO:0006950,GO:0006979,GO:0008150,GO:0008152,GO:0009056,GO:0009058,GO:0009636,GO:0009698,GO:0009699,GO:0009808,GO:0009809,GO:0009888,GO:0009889,GO:0009891,GO:0009893,GO:0009987,GO:0010087,GO:0010089,GO:0012505,GO:0016209,GO:0016491,GO:0016684,GO:0016999,GO:…	ko:K00430
Mt0012_10007	Medtr5g048310	NCR	207.54	219.17	257.5	5.36	5.32	8.16	228.07	6.28	-5.1826	1.43497e-131	3.25179e-129	#N/A	#N/A	#N/A	#N/A	#N/A
Mt0008_10384	Medtr4g035760		113.61	113.19	120.38	18.08	19.14	17.56	115.727	18.26	-2.664	2.20222e-131	4.95826e-129	G	Belongs to the glycosyl hydrolase 5 (cellulase A) family	-	GO:0000272,GO:0003674,GO:0003824,GO:0004338,GO:0004553,GO:0005488,GO:0005575,GO:0005576,GO:0005623,GO:0005975,GO:0005976,GO:0006073,GO:0008150,GO:0008152,GO:0008422,GO:0009056,GO:0009057,GO:0009251,GO:0009986,GO:0009987,GO:0015926,GO:0016043,GO:0016052,GO:0016787,GO:0016798,GO:0043167,GO:0043169,GO:0043170,GO:0044042,GO:0044237,GO:0044238,GO:0044260,GO:0044262,GO:0044264,GO:0044464,GO:0045229,GO:…	-
Mt0006_00938	Medtr3g069420		266.08	300.63	251.99	35.85	32.45	31.54	272.9	33.28	-3.0356	2.40916e-131	5.38942e-129	E	Protein NRT1 PTR FAMILY 5.6-like	-	GO:0003674,GO:0005215,GO:0005575,GO:0005623,GO:0005886,GO:0006810,GO:0006857,GO:0008150,GO:0015833,GO:0016020,GO:0016021,GO:0022857,GO:0031224,GO:0042886,GO:0044425,GO:0044464,GO:0051179,GO:0051234,GO:0055085,GO:0071702,GO:0071705,GO:0071944	ko:K14638
Mt0039_10178	Medtr1g088150		58.93	58.97	61.51	8.74	7.1	7.73	59.8033	7.85667	-2.9282	2.24242e-130	4.95291e-128	-	-	-	-	-
Mt0003_00443	Medtr4g060720	NCR	126.23	142.21	149.33	8.77	6.67	9.23	139.257	8.22333	-4.0819	1.12681e-129	2.47317e-127	#N/A	#N/A	#N/A	#N/A	#N/A
Mt0012_10005	Medtr5g048335		52.44	47.56	65.6	2.26	2.43	1.97	55.2	2.22	-4.636	2.24338e-129	4.8931e-127	#N/A	#N/A	#N/A	#N/A	#N/A
Mt0009_10220	Medtr8g089400		43.04	41.68	41.71	6.04	5.62	6.11	42.1433	5.92333	-2.8308	3.2122e-129	6.96269e-127	S	glucan endo-1,3-beta-glucosidase	-	-	-
Mt0003_10253	Medtr4g056320		126.71	139.29	167.12	2.6	4.33	3.59	144.373	3.50667	-5.3636	3.49261e-129	7.52378e-127	#N/A	#N/A	#N/A	#N/A	#N/A
Mt0075_00013	Medtr8g061360		1.73	0.95	1.53	73.32	80.48	102.52	1.40333	85.44	5.928	4.42434e-129	9.47242e-127	E	Aminotransferase	-	GO:0003674,GO:0003824,GO:0004838,GO:0005488,GO:0005575,GO:0005622,GO:0005623,GO:0005737,GO:0005829,GO:0006082,GO:0006520,GO:0006570,GO:0006572,GO:0006725,GO:0006766,GO:0006775,GO:0006807,GO:0008144,GO:0008150,GO:0008152,GO:0008483,GO:0009056,GO:0009058,GO:0009063,GO:0009072,GO:0009074,GO:0009110,GO:0009987,GO:0010189,GO:0016054,GO:0016740,GO:0016769,GO:0018130,GO:0019439,GO:0019752,GO:0019842,GO:…	ko:K00815
Mt0010_10327	Medtr5g084260		149.56	159.8	143.85	15.85	17.12	18.14	151.07	17.0367	-3.1485	5.02482e-129	1.06925e-126	#N/A	#N/A	#N/A	#N/A	#N/A
Mt0006_10908	Medtr3g069830	NCR236-TC40754	49.09	51	66.12	1.01	0.49	0.67	55.4033	0.723333	-6.2592	8.75026e-129	1.85071e-126	#N/A	#N/A	#N/A	#N/A	#N/A
Mt0002_10120	Medtr1g009760		86.82	86.28	74.06	6.27	4.89	3.88	82.3867	5.01333	-4.0386	2.92552e-128	6.15029e-126	P	Plasma membrane ATPase	-	GO:0000166,GO:0003674,GO:0003824,GO:0005215,GO:0005488,GO:0005524,GO:0005575,GO:0005623,GO:0005886,GO:0006810,GO:0006811,GO:0006812,GO:0008144,GO:0008150,GO:0008324,GO:0008553,GO:0015075,GO:0015077,GO:0015078,GO:0015318,GO:0015399,GO:0015405,GO:0015662,GO:0015672,GO:0016020,GO:0016021,GO:0016462,GO:0016787,GO:0016817,GO:0016818,GO:0016887,GO:0017076,GO:0017111,GO:0019829,GO:0022804,GO:0022853,GO:…	ko:K01535
Mt0008_00739	Medtr5g069100	NCR	226.51	251.16	244.54	23.78	27.23	26.13	240.737	25.7133	-3.2269	1.06909e-127	2.20765e-125	#N/A	#N/A	#N/A	#N/A	#N/A
Mt0006_00137	Medtr3g086750		104.24	114.94	110.22	13.12	12.78	13.92	109.8	13.2733	-3.0483	1.26562e-127	2.5981e-125	G	Belongs to the glycosyl hydrolase 5 (cellulase A) family	-	GO:0000272,GO:0003674,GO:0003824,GO:0004338,GO:0004553,GO:0005488,GO:0005575,GO:0005576,GO:0005975,GO:0005976,GO:0008150,GO:0008152,GO:0008422,GO:0009056,GO:0009057,GO:0009987,GO:0015926,GO:0016043,GO:0016052,GO:0016787,GO:0016798,GO:0043167,GO:0043169,GO:0043170,GO:0044238,GO:0045229,GO:0046872,GO:0071554,GO:0071555,GO:0071704,GO:0071840,GO:1901575	-
Mt0011_10306	Medtr7g088470		63.96	53.23	52.49	4.59	3.01	2.95	56.56	3.51667	-4.0075	3.20764e-127	6.54622e-125	G	Alpha-L-arabinofuranosidase	-	GO:0000272,GO:0003674,GO:0003824,GO:0004553,GO:0005575,GO:0005576,GO:0005618,GO:0005622,GO:0005623,GO:0005737,GO:0005773,GO:0005975,GO:0005976,GO:0005996,GO:0008150,GO:0008152,GO:0009044,GO:0009056,GO:0009057,GO:0009505,GO:0009987,GO:0010383,GO:0010410,GO:0016052,GO:0016787,GO:0016798,GO:0019321,GO:0019566,GO:0030312,GO:0043170,GO:0043226,GO:0043227,GO:0043229,GO:0043231,GO:0044036,GO:0044237,GO:…	ko:K01209
Mt0003_01152	Medtr0685s0030		45.2	40.65	47.78	251.73	243.53	244.33	44.5433	246.53	2.4685	2.58352e-126	5.24184e-124	V	Male sterility protein	-	-	-
Mt0134_10017	Medtr2g450150	NCR	34.22	28.08	34.57	1.55	1.91	1.85	32.29	1.77	-4.1893	2.68605e-126	5.41836e-124	#N/A	#N/A	#N/A	#N/A	#N/A
Mt0138_00008	Medtr6g057520		138.31	168.5	174.67	7.15	9.1	8.45	160.493	8.23333	-4.2849	7.30235e-126	1.46458e-123	#N/A	#N/A	#N/A	#N/A	#N/A
Mt0006_00771	Medtr3g072500		12.23	13.75	13.73	116.83	104.85	114.01	13.2367	111.897	3.0796	2.40725e-125	4.77319e-123	S	WAT1-related protein	-	GO:0003333,GO:0003674,GO:0005215,GO:0005342,GO:0005575,GO:0005622,GO:0005623,GO:0005737,GO:0005886,GO:0005887,GO:0005938,GO:0006810,GO:0006811,GO:0006820,GO:0006865,GO:0007154,GO:0007165,GO:0008150,GO:0008509,GO:0008514,GO:0009719,GO:0009725,GO:0009733,GO:0009734,GO:0009755,GO:0009987,GO:0010033,GO:0015075,GO:0015171,GO:0015179,GO:0015318,GO:0015562,GO:0015711,GO:0015807,GO:0015849,GO:0016020,GO:…	-
Mt0093_00032	Medtr6g038320	NCR	46.34	51.22	57.8	1.42	1.51	2.05	51.7867	1.66	-4.9633	2.88909e-125	5.69624e-123	#N/A	#N/A	#N/A	#N/A	#N/A
Mt0259_00001	Medtr0927s0010		2.01	3.25	3.02	73.39	76.52	78.15	2.76	76.02	4.7836	3.75706e-125	7.36594e-123	S	(3S,6E)-nerolidol synthase	NES	GO:0000287,GO:0003674,GO:0003824,GO:0005488,GO:0005575,GO:0005622,GO:0005623,GO:0005737,GO:0005829,GO:0006629,GO:0006720,GO:0006721,GO:0006950,GO:0006952,GO:0008150,GO:0008152,GO:0008299,GO:0008610,GO:0009058,GO:0009507,GO:0009536,GO:0009605,GO:0009607,GO:0009611,GO:0009617,GO:0009987,GO:0010333,GO:0010334,GO:0016101,GO:0016102,GO:0016114,GO:0016829,GO:0016835,GO:0016838,GO:0031347,GO:0034007,GO:…	ko:K14175,ko:K15086
Mt0008_10852	Medtr5g072450	NCR100-TC32805 NCRb	43.7	41.09	57	0.84	1.01	1.16	47.2633	1.00333	-5.5578	8.4864e-125	1.64532e-122	#N/A	#N/A	#N/A	#N/A	#N/A
Mt0177_00008	Medtr1g052005	NCR	185.4	204.55	246.48	8.77	8.45	11.2	212.143	9.47333	-4.485	1.04117e-124	2.00744e-122	#N/A	#N/A	#N/A	#N/A	#N/A
Mt0101_10074	Medtr2g437910		11.64	8.96	9.43	98.04	105.09	113.05	10.01	105.393	3.3963	3.00493e-124	5.76186e-122	T	Vacuolar-sorting receptor	-	GO:0000139,GO:0003674,GO:0005488,GO:0005509,GO:0005575,GO:0005622,GO:0005623,GO:0005737,GO:0005768,GO:0005770,GO:0005794,GO:0006810,GO:0008104,GO:0008150,GO:0010008,GO:0012505,GO:0012506,GO:0015031,GO:0015833,GO:0016020,GO:0016021,GO:0030135,GO:0030136,GO:0030659,GO:0030662,GO:0030665,GO:0031090,GO:0031224,GO:0031410,GO:0031902,GO:0031982,GO:0031984,GO:0033036,GO:0042886,GO:0043167,GO:0043169,GO:…	-
Mt0016_00439	Medtr2g096010		354.75	347.46	347.2	73.42	74.43	63.46	349.803	70.4367	-2.3121	2.538e-123	4.83996e-121	Z	Belongs to the TRAFAC class myosin-kinesin ATPase superfamily. Kinesin family	-	GO:0000166,GO:0000226,GO:0000278,GO:0000281,GO:0000902,GO:0000910,GO:0000911,GO:0003674,GO:0003774,GO:0003777,GO:0003824,GO:0005488,GO:0005515,GO:0005524,GO:0005575,GO:0005622,GO:0005623,GO:0005737,GO:0005819,GO:0005856,GO:0005871,GO:0005874,GO:0005875,GO:0005886,GO:0006928,GO:0006996,GO:0007010,GO:0007017,GO:0007018,GO:0007049,GO:0007051,GO:0007052,GO:0008017,GO:0008092,GO:0008144,GO:0008150,GO:…	ko:K10398
Mt0053_10028	Medtr1g054635		289.56	282.6	335.9	37.1	40.29	37.01	302.687	38.1333	-2.9887	4.91669e-123	9.32515e-121	I	Catalyzes the reduction of fatty acyl-CoA to fatty alcohols	-	GO:0003674,GO:0003824,GO:0005575,GO:0005622,GO:0005623,GO:0005737,GO:0006139,GO:0006163,GO:0006629,GO:0006637,GO:0006725,GO:0006732,GO:0006753,GO:0006790,GO:0006793,GO:0006796,GO:0006807,GO:0007275,GO:0008150,GO:0008152,GO:0009058,GO:0009117,GO:0009150,GO:0009259,GO:0009507,GO:0009536,GO:0009555,GO:0009653,GO:0009698,GO:0009699,GO:0009987,GO:0010208,GO:0010345,GO:0010584,GO:0010927,GO:0016043,GO:…	ko:K13356
Mt0020_10012	Medtr8g070770		121	112.71	103.63	7.39	10.26	8.13	112.447	8.59333	-3.7099	2.63377e-121	4.94157e-119	T	Belongs to the DEFL family	-	GO:0001906,GO:0005575,GO:0005576,GO:0005618,GO:0005623,GO:0005886,GO:0006950,GO:0006952,GO:0008150,GO:0009505,GO:0009605,GO:0009607,GO:0009620,GO:0016020,GO:0030312,GO:0031640,GO:0035821,GO:0043207,GO:0044364,GO:0044419,GO:0044464,GO:0050832,GO:0050896,GO:0051704,GO:0051707,GO:0071944,GO:0098542	-
Mt0008_00245	Medtr5g056735		80.05	78.57	88.41	8.57	9.4	7.2	82.3433	8.39	-3.2949	2.99778e-121	5.59447e-119	#N/A	#N/A	#N/A	#N/A	#N/A
Mt0002_10760	Medtr3g090800		2494.16	2754.91	2788.96	307.58	300.53	344.16	2679.34	317.423	-3.0774	5.29615e-121	9.83112e-119	T	Protein kinase domain	-	-	-
Mt0004_10999	Medtr1g070350		59.01	62.11	64.9	7.62	7.22	6.08	62.0067	6.97333	-3.1525	7.35452e-121	1.35798e-118	S	Zein-binding	-	GO:0005575,GO:0005623,GO:0012505,GO:0016020,GO:0016021,GO:0031224,GO:0044425,GO:0044464	-
Mt0121_00057	Medtr2125s0010	NCR	377.76	398.2	438.66	58.75	56.79	59.43	404.873	58.3233	-2.7953	7.79927e-121	1.43252e-118	#N/A	#N/A	#N/A	#N/A	#N/A
Mt0032_10312	Medtr6g452900		113.96	117.32	135.32	11.8	12.05	13.17	122.2	12.34	-3.3078	1.14934e-120	2.09998e-118	#N/A	#N/A	#N/A	#N/A	#N/A
Mt0017_10651	Medtr3g020980	NCR	109.67	85.95	110.22	10.15	9.22	7.29	101.947	8.88667	-3.52	1.2429e-120	2.2591e-118	#N/A	#N/A	#N/A	#N/A	#N/A
Mt0130_10022	Medtr0003s0210		53.97	55.61	64.73	4.55	4.92	3.91	58.1033	4.46	-3.7035	7.57994e-120	1.37059e-117	#N/A	#N/A	#N/A	#N/A	#N/A
Mt0078_10112	Medtr4g007095		93.39	85.11	95.38	20.24	19.24	18.32	91.2933	19.2667	-2.2444	7.91574e-120	1.42394e-117	I	Catalyzes the second two steps of the methylation pathway of phosphatidylcholine biosynthesis, the SAM-dependent methylation of phosphatidylmonomethylethanolamine (PMME) to phosphatidyldimethylethanolamine (PDME) and of PDME to phosphatidylcholine (PC)	-	-	ko:K00550
Mt0007_00332	Medtr3g094730		34.85	34.44	40.29	2.02	1.69	1.22	36.5267	1.64333	-4.4743	3.13266e-119	5.60634e-117	#N/A	#N/A	#N/A	#N/A	#N/A
Mt0073_10114	Medtr2g450040	CP450	14.08	10.35	10.96	93.32	96.28	95	11.7967	94.8667	3.0075	3.99263e-119	7.10892e-117	Q	Cytochrome p450	-	GO:0003674,GO:0003824,GO:0004497,GO:0005488,GO:0005506,GO:0005575,GO:0008150,GO:0008152,GO:0009058,GO:0016020,GO:0016491,GO:0016705,GO:0016709,GO:0019748,GO:0020037,GO:0043167,GO:0043169,GO:0044550,GO:0046872,GO:0046906,GO:0046914,GO:0048037,GO:0055114,GO:0097159,GO:1901363	ko:K07408
Mt0009_00124	Medtr8g087425		1.77	2.6	1.91	48.16	53.56	54.34	2.09333	52.02	4.6352	7.61635e-119	1.34922e-116	O	glutathione transferase activity	GSTU6	GO:0003674,GO:0003824,GO:0004364,GO:0005488,GO:0005575,GO:0005622,GO:0005623,GO:0005737,GO:0005829,GO:0005886,GO:0005911,GO:0006518,GO:0006575,GO:0006749,GO:0006790,GO:0006807,GO:0006950,GO:0006979,GO:0008150,GO:0008152,GO:0009056,GO:0009404,GO:0009407,GO:0009506,GO:0009636,GO:0009987,GO:0016020,GO:0016740,GO:0016765,GO:0019748,GO:0030054,GO:0033218,GO:0034641,GO:0042221,GO:0042277,GO:0043167,GO:…	ko:K00799
Mt0014_10679	Medtr4g021027		2.79	3.07	3.68	52.58	43.17	49.07	3.18	48.2733	3.9241	1.02398e-118	1.80479e-116	T	TMV resistance protein N-like	-	GO:0000166,GO:0002376,GO:0003674,GO:0005488,GO:0005524,GO:0005575,GO:0005622,GO:0005623,GO:0005737,GO:0006950,GO:0006952,GO:0006955,GO:0007154,GO:0007165,GO:0008144,GO:0008150,GO:0008219,GO:0009626,GO:0009987,GO:0012501,GO:0017076,GO:0023052,GO:0030554,GO:0032553,GO:0032555,GO:0032559,GO:0033554,GO:0034050,GO:0035639,GO:0036094,GO:0043167,GO:0043168,GO:0043531,GO:0044424,GO:0044464,GO:0045087,GO:…	-
Mt0117_10006	Medtr0888s0020	NCR	91.62	96.55	111.82	11.43	10.85	10.47	99.9967	10.9167	-3.1953	2.30006e-118	4.03354e-116	#N/A	#N/A	#N/A	#N/A	#N/A
Mt0003_10554	Medtr4g063600		186.15	171.72	170.44	54.23	51.99	49.6	176.103	51.94	-1.7615	4.32685e-118	7.54992e-116	GM	udp-glucuronic acid decarboxylase	UXS5	GO:0000139,GO:0000166,GO:0003674,GO:0003824,GO:0005488,GO:0005515,GO:0005575,GO:0005622,GO:0005623,GO:0005737,GO:0005794,GO:0005795,GO:0005829,GO:0005886,GO:0005975,GO:0005996,GO:0006139,GO:0006725,GO:0006793,GO:0006807,GO:0008150,GO:0008152,GO:0009058,GO:0009225,GO:0009226,GO:0009987,GO:0012505,GO:0016020,GO:0016021,GO:0016043,GO:0016829,GO:0016830,GO:0016831,GO:0018130,GO:0019321,GO:0019438,GO:…	ko:K08678
Mt0043_10096	Medtr3g026780		104.56	112.46	104.19	17.81	17.36	17.68	107.07	17.6167	-2.6035	5.69988e-118	9.89624e-116	H	Belongs to the precorrin methyltransferase family	-	GO:0000166,GO:0003674,GO:0003824,GO:0004325,GO:0004851,GO:0005488,GO:0006725,GO:0006766,GO:0006767,GO:0006778,GO:0006779,GO:0006783,GO:0006807,GO:0008150,GO:0008152,GO:0008168,GO:0008169,GO:0008757,GO:0009058,GO:0009110,GO:0009235,GO:0009236,GO:0009987,GO:0016491,GO:0016627,GO:0016628,GO:0016740,GO:0016741,GO:0016829,GO:0017144,GO:0018130,GO:0019354,GO:0019438,GO:0032259,GO:0033013,GO:0033014,GO:…	ko:K02303
Mt0031_10022	Medtr7g098220		613.11	568.9	572.56	126.84	123.81	102.84	584.857	117.83	-2.3114	9.53268e-118	1.64611e-115	E	Peptide transporter	-	-	ko:K14638
Mt0010_00934	Medtr5g095590	NCR	689.78	693.78	744.84	84.25	96.49	96.7	709.467	92.48	-2.9395	9.57535e-118	1.64611e-115	#N/A	#N/A	#N/A	#N/A	#N/A
Mt0002_10223	Medtr1g012620		147.4	154.54	156.33	31.06	28.33	28.39	152.757	29.26	-2.3842	9.71361e-118	1.66169e-115	-	-	-	-	-
Mt0008_00429	Medtr5g061800	NCR089-TC36530	724.28	866.56	862.38	45.36	56.51	57.44	817.74	53.1033	-3.9448	1.12426e-116	1.90458e-114	#N/A	#N/A	#N/A	#N/A	#N/A
Mt0069_10024	Medtr2g054830		30.72	27.53	34.5	1.82	1.78	1.36	30.9167	1.65333	-4.2249	2.75717e-116	4.6483e-114	#N/A	#N/A	#N/A	#N/A	#N/A
Mt0020_00191	Medtr8g074880		96.18	101.52	98.15	16.42	17.02	15.08	98.6167	16.1733	-2.6082	4.18454e-116	7.02078e-114	E	prolyl 4-hydroxylase	-	GO:0000139,GO:0003674,GO:0003824,GO:0004656,GO:0005488,GO:0005506,GO:0005515,GO:0005575,GO:0005622,GO:0005623,GO:0005737,GO:0005739,GO:0005783,GO:0005788,GO:0005789,GO:0005794,GO:0006082,GO:0006464,GO:0006520,GO:0006575,GO:0006807,GO:0007275,GO:0008150,GO:0008152,GO:0009653,GO:0009888,GO:0009987,GO:0010015,GO:0010053,GO:0010054,GO:0012505,GO:0016020,GO:0016021,GO:0016043,GO:0016222,GO:0016491,GO:…	ko:K00472
Mt0011_00653	Medtr7g081580		37.65	34.44	34.46	203.47	167.75	171.15	35.5167	180.79	2.3477	1.54165e-115	2.57418e-113	O	Subtilisin-like protease	-	-	-
Mt0008_10833	Medtr5g072070	NCR	82.69	84.05	82.28	9.71	11.09	8.39	83.0067	9.73	-3.0927	9.559e-115	1.58852e-112	#N/A	#N/A	#N/A	#N/A	#N/A
Mt0006_00002	Medtr3g089125		355.41	389.87	449.48	27.72	26.27	18.72	398.253	24.2367	-4.0384	1.16932e-114	1.93398e-112	U	Mediates both low-affinity uptake and efflux of sugar across the membrane	-	GO:0003674,GO:0005215,GO:0005575,GO:0005622,GO:0005623,GO:0005737,GO:0005783,GO:0005789,GO:0005886,GO:0005887,GO:0006810,GO:0008150,GO:0008643,GO:0009987,GO:0012505,GO:0015144,GO:0016020,GO:0016021,GO:0016043,GO:0022607,GO:0022857,GO:0031224,GO:0031226,GO:0031984,GO:0034219,GO:0042175,GO:0043226,GO:0043227,GO:0043229,GO:0043231,GO:0043933,GO:0044085,GO:0044422,GO:0044424,GO:0044425,GO:0044432,GO:…	ko:K15382
Mt0010_10847	Medtr5g095400		371.31	317.33	323.55	57.94	51.87	42.39	337.397	50.7333	-2.7334	1.38425e-114	2.27866e-112	S	function	-	-	-
Mt0020_10227	Medtr8g076340		32.37	29.17	34.05	3.84	3.5	3.3	31.8633	3.54667	-3.1674	5.94071e-114	9.73328e-112	K	Transcriptional activator that specifically binds 5'- GATA-3' or 5'-GAT-3' motifs within gene promoters	-	GO:0000976,GO:0000977,GO:0000981,GO:0001012,GO:0001067,GO:0001085,GO:0001228,GO:0003674,GO:0003676,GO:0003677,GO:0003682,GO:0003690,GO:0003700,GO:0005488,GO:0005515,GO:0005575,GO:0005622,GO:0005623,GO:0005634,GO:0005667,GO:0006139,GO:0006351,GO:0006355,GO:0006357,GO:0006366,GO:0006725,GO:0006807,GO:0008134,GO:0008150,GO:0008152,GO:0008270,GO:0009058,GO:0009059,GO:0009889,GO:0009891,GO:0009893,GO:…	-
Mt0003_01350	Medtr4g081685		8.14	7.53	6.48	53.62	51.16	49.88	7.38333	51.5533	2.8037	1.00329e-113	1.63611e-111	T	divergent subfamily of APPLE domains	-	GO:0000003,GO:0000166,GO:0003674,GO:0003824,GO:0004672,GO:0004674,GO:0005488,GO:0005515,GO:0005516,GO:0005524,GO:0005575,GO:0005623,GO:0005886,GO:0006464,GO:0006468,GO:0006793,GO:0006796,GO:0006807,GO:0007154,GO:0008037,GO:0008144,GO:0008150,GO:0008152,GO:0009856,GO:0009875,GO:0009987,GO:0016020,GO:0016301,GO:0016310,GO:0016740,GO:0016772,GO:0016773,GO:0017076,GO:0019538,GO:0022414,GO:0030246,GO:…	-
Mt0003_00405	Medtr4g059900	NCR140-TC40943	240.12	234.78	258.41	45.09	47.51	41.67	244.437	44.7567	-2.4493	1.14455e-113	1.85779e-111	#N/A	#N/A	#N/A	#N/A	#N/A
Mt0001_00148	Medtr1g050130		58.81	48.7	57.69	7.08	6.98	5.5	55.0667	6.52	-3.0782	1.1681e-113	1.88724e-111	#N/A	#N/A	#N/A	#N/A	#N/A
Mt0054_10215	Medtr6g463200	NCR001-TC35566	2531.14	3070.01	3403.79	95.55	114.13	140.05	3001.65	116.577	-4.6864	2.34493e-113	3.77113e-111	#N/A	#N/A	#N/A	#N/A	#N/A
Mt0024_00349	Medtr6g091605	NCR	48.9	53.19	64.11	1.72	2.34	2.4	55.4	2.15333	-4.6852	2.34629e-112	3.756e-110	#N/A	#N/A	#N/A	#N/A	#N/A
Mt0032_00069	Medtr6g043450		69.71	60.98	70.73	7.93	6.45	5.24	67.14	6.54	-3.3598	3.06477e-112	4.88375e-110	S	function	-	-	-
Mt0137_00014	Medtr2g041100		27.34	27.02	31.27	0.3	0.61	0.58	28.5433	0.496667	-5.8447	6.92848e-112	1.09905e-109	#N/A	#N/A	#N/A	#N/A	#N/A
Mt0002_10160	Medtr1g010310	NCR	69.43	57.76	71.35	8.9	9.07	9.4	66.18	9.12333	-2.8588	2.67476e-111	4.2237e-109	#N/A	#N/A	#N/A	#N/A	#N/A
Mt0003_00435	Medtr4g060660		72.85	97.69	118.02	0.44	0.8	1.07	96.1867	0.77	-6.9648	5.47844e-111	8.61201e-109	#N/A	#N/A	#N/A	#N/A	#N/A
Mt0008_10721	Medtr5g069890		49.88	41.6	47.43	0.37	0.15	0.09	46.3033	0.203333	-7.8311	3.43622e-110	5.37746e-108	#N/A	#N/A	#N/A	#N/A	#N/A
Mt0041_00237	Medtr4g091850		4.13	3.47	3.88	48.53	51.93	40.31	3.82667	46.9233	3.6161	4.3976e-110	6.85122e-108	T	G-type lectin S-receptor-like serine threonine-protein kinase	-	GO:0000003,GO:0000166,GO:0003674,GO:0003824,GO:0004672,GO:0004674,GO:0005488,GO:0005515,GO:0005516,GO:0005524,GO:0005575,GO:0005623,GO:0005886,GO:0006464,GO:0006468,GO:0006793,GO:0006796,GO:0006807,GO:0007154,GO:0008037,GO:0008144,GO:0008150,GO:0008152,GO:0009856,GO:0009875,GO:0009987,GO:0016020,GO:0016021,GO:0016301,GO:0016310,GO:0016740,GO:0016772,GO:0016773,GO:0017076,GO:0019538,GO:0022414,GO:…	-
Mt0153_10022	Medtr4g033290		145.19	119.51	149.78	6.71	9.25	9.52	138.16	8.49333	-4.0239	5.76811e-110	8.94647e-108	#N/A	#N/A	#N/A	#N/A	#N/A
Mt0002_10802	Medtr1g027070		4.01	3.58	4.26	44.72	51.66	50.81	3.95	49.0633	3.6347	5.99853e-110	9.26269e-108	T	receptor-like protein kinase	-	-	-
Mt0010_00402	Medtr5g085420		144.8	149.64	159.42	25.94	26.8	26.27	151.287	26.3367	-2.5221	6.03954e-110	9.28492e-108	S	Protein of unknown function (DUF423)	-	-	-
Mt0013_10063	Medtr3g062820	NCR	128.91	164.63	213.78	3.81	4.3	5.06	169.107	4.39	-5.2676	7.03901e-110	1.0774e-107	#N/A	#N/A	#N/A	#N/A	#N/A
Mt0038_00312	Medtr8g064070		53.34	46.91	68.72	0.37	0.83	0.9	56.3233	0.7	-6.3302	7.16028e-110	1.09118e-107	#N/A	#N/A	#N/A	#N/A	#N/A
Mt0010_00367	Medtr5g084770	GDSL esterase	33.44	28.7	34.71	2.73	2.8	3.18	32.2833	2.90333	-3.475	9.88543e-110	1.49992e-107	I	Belongs to the 'GDSL' lipolytic enzyme family	-	GO:0003674,GO:0003824,GO:0005575,GO:0005576,GO:0006629,GO:0008150,GO:0008152,GO:0009056,GO:0016042,GO:0016787,GO:0016788,GO:0044238,GO:0071704,GO:1901575	-
Mt0048_10128	Medtr2g072780	NCR	50.71	61.57	59.67	5.3	4.82	4.57	57.3167	4.89667	-3.5491	1.57726e-109	2.38282e-107	#N/A	#N/A	#N/A	#N/A	#N/A
Mt0068_10100	Medtr2g022380		16.72	16.27	14.25	173.79	129.19	161.4	15.7467	154.793	3.2972	3.21189e-109	4.8314e-107	O	Belongs to the peptidase A1 family	-	-	-
Mt0099_10008	Medtr6g466410	NCR150-TC35985	490.62	579.75	629.39	17.64	20.44	27.29	566.587	21.79	-4.7006	1.14883e-108	1.71333e-106	#N/A	#N/A	#N/A	#N/A	#N/A
Mt0018_00456	Medtr2g035170		9.28	8.04	10.05	90.08	103.87	106.19	9.12333	100.047	3.455	1.2421e-108	1.84454e-106	S	Major allergen Pru	-	GO:0006950,GO:0006952,GO:0008150,GO:0009607,GO:0050896	-
Mt0040_10298	Medtr3g115450		372.88	384.31	443.06	63.17	54.61	51.48	400.083	56.42	-2.826	2.64925e-108	3.91753e-106	I	Niemann-Pick C1	NPC1	GO:0000323,GO:0003674,GO:0005215,GO:0005319,GO:0005488,GO:0005496,GO:0005575,GO:0005576,GO:0005622,GO:0005623,GO:0005634,GO:0005635,GO:0005737,GO:0005764,GO:0005765,GO:0005768,GO:0005770,GO:0005773,GO:0005774,GO:0005783,GO:0005886,GO:0005887,GO:0006066,GO:0006082,GO:0006464,GO:0006486,GO:0006629,GO:0006807,GO:0006810,GO:0006869,GO:0007034,GO:0007041,GO:0008150,GO:0008152,GO:0008202,GO:0008203,GO:…	ko:K12385
Mt0001_11794	Medtr4g094352		72.74	71.69	79.09	13.76	13.67	12.85	74.5067	13.4267	-2.4723	5.75659e-108	8.47651e-106	S	WAT1-related protein	-	-	-
Mt0007_00451	Medtr3g097010		533.06	483.16	469.73	137.91	139.08	123.67	495.317	133.553	-1.8909	1.21222e-107	1.77749e-105	S	CBS domain-containing protein	-	GO:0005575,GO:0016020,GO:0016021,GO:0031224,GO:0044425	-
Mt0088_10045	Medtr7g016440	NCR	80.8	68.4	94.06	4.22	2.58	4.02	81.0867	3.60667	-4.4907	1.273e-107	1.85879e-105	#N/A	#N/A	#N/A	#N/A	#N/A
Mt0001_10374	Medtr4g127620		136.74	125.4	123.6	25.13	21.94	18.55	128.58	21.8733	-2.5554	1.79949e-107	2.6166e-105	S	Protein of unknown function (DUF630)	-	-	-
Mt0010_10273	Medtr5g083250		40.28	39.74	42.65	6.71	5.81	5.5	40.89	6.00667	-2.7671	3.69522e-107	5.35086e-105	#N/A	#N/A	#N/A	#N/A	#N/A
Mt0044_00029	Medtr7g034345		84.1	71.07	73.3	13.12	14.04	11.31	76.1567	12.8233	-2.5702	4.52922e-107	6.53143e-105	H	Belongs to the precorrin methyltransferase family	-	GO:0000166,GO:0003674,GO:0003824,GO:0004325,GO:0004851,GO:0005488,GO:0006725,GO:0006766,GO:0006767,GO:0006778,GO:0006779,GO:0006783,GO:0006807,GO:0008150,GO:0008152,GO:0008168,GO:0008169,GO:0008757,GO:0009058,GO:0009110,GO:0009235,GO:0009236,GO:0009987,GO:0016491,GO:0016627,GO:0016628,GO:0016740,GO:0016741,GO:0016829,GO:0017144,GO:0018130,GO:0019354,GO:0019438,GO:0032259,GO:0033013,GO:0033014,GO:…	ko:K02303
Mt0050_10186	Medtr0015s0230	NCR	208.96	200.53	221.24	20.88	24.86	26.16	210.243	23.9667	-3.133	4.87246e-107	6.99749e-105	#N/A	#N/A	#N/A	#N/A	#N/A
Mt0031_00055	Medtr7g099260		64.4	65.29	63.21	12.48	10.6	9.87	64.3	10.9833	-2.5495	7.80701e-107	1.11659e-104	-	-	-	-	-
Mt0008_00334	Medtr5g459510	NCR	89.57	90.41	107.93	4.28	5.47	6.28	95.97	5.34333	-4.1668	2.18514e-106	3.11253e-104	#N/A	#N/A	#N/A	#N/A	#N/A
Mt0006_00580	Medtr3g076970		92.92	96.63	86.4	14.77	13.31	11.2	91.9833	13.0933	-2.8125	2.30098e-106	3.26422e-104	T	Belongs to the protein kinase superfamily	-	GO:0000166,GO:0003674,GO:0003824,GO:0004672,GO:0004674,GO:0005488,GO:0005524,GO:0005575,GO:0005622,GO:0005623,GO:0005737,GO:0006464,GO:0006468,GO:0006793,GO:0006796,GO:0006807,GO:0007154,GO:0007165,GO:0008144,GO:0008150,GO:0008152,GO:0009987,GO:0016301,GO:0016310,GO:0016740,GO:0016772,GO:0016773,GO:0017076,GO:0019538,GO:0023052,GO:0030554,GO:0032553,GO:0032555,GO:0032559,GO:0035556,GO:0035639,GO:…	-
Mt0013_00719	Medtr3g055450	MtN22	4592.42	4716.05	5002.62	467.21	573.84	566.15	4770.36	535.733	-3.1545	3.05274e-106	4.31314e-104	#N/A	#N/A	#N/A	#N/A	#N/A
Mt0017_00639	Medtr3g021050	NCR	48.27	42.66	46.15	6.37	7.34	7.09	45.6933	6.93333	-2.7204	3.34417e-106	4.70585e-104	#N/A	#N/A	#N/A	#N/A	#N/A
Mt0068_10103	Medtr2g022330		24.43	27.46	26.73	270.79	238.24	305.33	26.2067	271.453	3.3727	4.57038e-106	6.40551e-104	O	Belongs to the peptidase A1 family	-	-	-
Mt0008_00769	Medtr5g069545	NCR	154.28	157.31	169.79	31.6	31.8	29.2	160.46	30.8667	-2.3781	7.72854e-106	1.07884e-103	#N/A	#N/A	#N/A	#N/A	#N/A
Mt0003_10096	Medtr4g052300		4.68	5.59	5.27	69.41	88.25	77.69	5.18	78.45	3.9207	1.84561e-105	2.56606e-103	Q	Secoisolariciresinol dehydrogenase-like	-	-	-
Mt0017_10296	Medtr3g012130		88.78	81.49	105.99	9.54	7.04	8.25	92.0867	8.27667	-3.4759	5.49097e-105	7.60412e-103	L	function	-	-	-
Mt0023_00001	Medtr2g016530		1.06	0.62	1.01	28.77	34.29	32.55	0.896667	31.87	5.1515	6.21869e-105	8.57786e-103	T	LRR receptor-like serine threonine-protein kinase	-	-	ko:K04733,ko:K13420
Mt0028_00268	Medtr8g023770		9.83	9.72	9.99	94.06	91.76	71.99	9.84667	85.9367	3.1256	7.28709e-105	1.0012e-102	S	inactive purple acid phosphatase	-	GO:0003674,GO:0003824,GO:0003993,GO:0005488,GO:0005575,GO:0005576,GO:0006793,GO:0006796,GO:0008150,GO:0008152,GO:0009987,GO:0016311,GO:0016787,GO:0016788,GO:0016791,GO:0042578,GO:0043167,GO:0043169,GO:0044237,GO:0046872	-
Mt0010_00302	Medtr5g083255	NCR052-TC31686	83.91	59.12	89.52	4.32	3.56	4.72	77.5167	4.2	-4.206	9.53344e-105	1.3047e-102	#N/A	#N/A	#N/A	#N/A	#N/A
Mt0016_10351	Medtr2g098420		125.96	110.66	111.82	22.26	18.59	16.12	116.147	18.99	-2.6126	1.17107e-104	1.59641e-102	-	-	-	-	-
Mt0005_10295	Medtr5g010635		8.26	5.08	6.9	92.75	77.68	75.35	6.74667	81.9267	3.6021	1.18193e-104	1.60494e-102	O	Thaumatin family	-	GO:0001906,GO:0005575,GO:0005576,GO:0006950,GO:0006952,GO:0008150,GO:0009605,GO:0009607,GO:0009620,GO:0031640,GO:0035821,GO:0043207,GO:0044364,GO:0044419,GO:0050832,GO:0050896,GO:0051704,GO:0051707,GO:0098542	-
Mt0007_10712	Medtr3g102660		68.01	76.92	77.35	8.74	8.39	6.8	74.0933	7.97667	-3.2155	1.22777e-104	1.66073e-102	S	Gibberellin regulated protein	-	-	-
Mt0008_10256	Medtr5g058510	NCR	63.18	72.13	73.47	7.35	8.02	7.64	69.5933	7.67	-3.1817	2.9723e-104	4.00492e-102	#N/A	#N/A	#N/A	#N/A	#N/A
Mt0086_10095	Medtr7g065260		5.39	3.88	5.1	49.24	41.45	42.22	4.79	44.3033	3.2093	3.36744e-104	4.51988e-102	O	glutathione s-transferase	-	-	ko:K00799
Mt0035_10305	Medtr7g027060	NCR	54.64	81.89	91.46	0.34	0.8	0.55	75.9967	0.563333	-7.0758	6.47936e-104	8.63041e-102	#N/A	#N/A	#N/A	#N/A	#N/A
Mt0019_10536	Medtr2g090875		66.91	67.41	72.12	11.53	11.68	9.81	68.8133	11.0067	-2.6443	7.16959e-104	9.51347e-102	S	Belongs to the small GTPase superfamily. Rho family	-	GO:0000166,GO:0001882,GO:0001883,GO:0003674,GO:0003824,GO:0003924,GO:0005488,GO:0005525,GO:0005575,GO:0005622,GO:0005623,GO:0005737,GO:0005886,GO:0007154,GO:0007165,GO:0007264,GO:0008150,GO:0009987,GO:0016020,GO:0016462,GO:0016787,GO:0016817,GO:0016818,GO:0017076,GO:0017111,GO:0019001,GO:0023052,GO:0032549,GO:0032550,GO:0032553,GO:0032555,GO:0032561,GO:0035556,GO:0035639,GO:0036094,GO:0043167,GO:…	ko:K04392
Mt0017_10468	Medtr3g015845		26	20.98	26.63	1.38	1.66	1.33	24.5367	1.45667	-4.0742	9.29651e-104	1.2289e-101	#N/A	#N/A	#N/A	#N/A	#N/A
Mt0038_00180	Medtr8g069310	NCR	26.55	28.95	35.19	0.51	0.74	0.67	30.23	0.64	-5.5618	9.99928e-104	1.31681e-101	#N/A	#N/A	#N/A	#N/A	#N/A
Mt0093_00047	Medtr6g038600		148.18	150.15	182.72	18.35	19.61	19.04	160.35	19	-3.0772	1.82764e-103	2.39778e-101	#N/A	#N/A	#N/A	#N/A	#N/A
Mt0088_00051	Medtr7g016720		17.62	16.09	16.75	185.26	249.92	186.03	16.82	207.07	3.6219	1.91838e-103	2.5074e-101	H	Belongs to the chalcone stilbene synthases family	CHS3	GO:0003674,GO:0003824,GO:0008150,GO:0008152,GO:0009058,GO:0009812,GO:0009813,GO:0016210,GO:0016740,GO:0016746,GO:0016747,GO:0071704,GO:1901576	ko:K00660
Mt0013_00116	Medtr3g467360		4.64	2.6	4.26	60.74	57.77	56.89	3.83333	58.4667	3.9309	2.7734e-103	3.61143e-101	S	Senescence-associated carboxylesterase 101-like	-	-	-
Mt0024_00282	Medtr6g088785		3.54	3.73	4.02	60.98	80.36	81.69	3.76333	74.3433	4.3041	3.39563e-103	4.40523e-101	T	Belongs to the protein kinase superfamily. Ser Thr protein kinase family	-	GO:0000166,GO:0003674,GO:0003824,GO:0004672,GO:0004674,GO:0005488,GO:0005524,GO:0005575,GO:0005623,GO:0005886,GO:0006464,GO:0006468,GO:0006793,GO:0006796,GO:0006807,GO:0007275,GO:0008144,GO:0008150,GO:0008152,GO:0009653,GO:0009791,GO:0009987,GO:0010015,GO:0010101,GO:0010102,GO:0010468,GO:0016020,GO:0016021,GO:0016301,GO:0016310,GO:0016740,GO:0016772,GO:0016773,GO:0017076,GO:0019222,GO:0019538,GO:…	ko:K00924
Mt0055_10072	Medtr2g039120		26.16	18.5	22.68	219.69	222.67	263.43	22.4467	235.263	3.3897	7.47799e-103	9.66544e-101	G	beta-galactosidase activity	-	-	-
Mt0012_00478	Medtr5g037630		45.12	36.6	36.02	6.07	5.99	5.53	39.2467	5.86333	-2.7428	1.17925e-102	1.51858e-100	S	TMV resistance protein	-	-	-
Mt0008_10443	Medtr5g063670		102.99	111.25	106.86	22.02	20.62	20.28	107.033	20.9733	-2.3514	4.50306e-102	5.77749e-100	U	Annexin D1-like	-	-	ko:K17098
Mt0085_10026	Medtr7g028020		0.98	1.17	0.55	66.68	43.97	65.37	0.9	58.6733	6.0266	6.39239e-102	8.17148e-100	Q	Belongs to the cytochrome P450 family	-	GO:0003674,GO:0003824,GO:0004497,GO:0005488,GO:0005506,GO:0005575,GO:0005622,GO:0005623,GO:0005737,GO:0005783,GO:0005789,GO:0006725,GO:0008150,GO:0008152,GO:0009058,GO:0009698,GO:0009699,GO:0009717,GO:0009987,GO:0012505,GO:0016020,GO:0016021,GO:0016491,GO:0016705,GO:0016709,GO:0018130,GO:0019438,GO:0019748,GO:0020037,GO:0031090,GO:0031224,GO:0031984,GO:0033770,GO:0033771,GO:0042175,GO:0043167,GO:…	ko:K00512,ko:K07408,ko:K13257
Mt0167_00009	Medtr2g055250		60.66	57	62.48	6.17	7.41	5.18	60.0467	6.25333	-3.2634	6.95201e-102	8.85443e-100	-	-	-	-	-
Mt0004_00517	Medtr1g061100	NCR	499	468.94	608.83	33.73	36.91	44.82	525.59	38.4867	-3.7715	1.1457e-101	1.45391e-99	#N/A	#N/A	#N/A	#N/A	#N/A
Mt0004_11287	Medtr1g076500		107.04	74.43	120.69	5.46	6.12	5.76	100.72	5.78	-4.1231	2.21232e-100	2.7973e-98	S	PDDEXK-like family of unknown function	-	-	-
Mt0025_00068	Medtr6g006275	NCR216-TC34461	113.84	124.37	141.36	8.97	11.55	10.45	126.523	10.3233	-3.6154	2.45196e-100	3.08912e-98	#N/A	#N/A	#N/A	#N/A	#N/A
Mt0051_00061	Medtr3g449540		3.93	3.69	4.54	55.95	46	41.26	4.05333	47.7367	3.5579	2.64887e-100	3.32518e-98	T	LRR receptor-like serine threonine-protein kinase	-	-	ko:K04733,ko:K13420
Mt0017_10316	Medtr3g012380	NCR	739.07	842.07	969.93	94.57	82.08	93.49	850.357	90.0467	-3.2393	4.38828e-100	5.48897e-98	#N/A	#N/A	#N/A	#N/A	#N/A
Mt0043_10167	Medtr3g028440	NCR	74.78	87.89	107.72	2.87	3.56	4.14	90.13	3.52333	-4.677	5.39607e-100	6.72543e-98	#N/A	#N/A	#N/A	#N/A	#N/A
Mt0050_10184	Medtr1g053975	NCR	28.95	27.71	28.43	2.66	2.18	3.1	28.3633	2.64667	-3.4218	1.42695e-99	1.77216e-97	#N/A	#N/A	#N/A	#N/A	#N/A
Mt0003_00809	Medtr2g055940		1.34	0.58	0.94	37.44	45.85	34.58	0.953333	39.29	5.365	1.70862e-99	2.11444e-97	S	Belongs to the class I-like SAM-binding methyltransferase superfamily. Cation-independent O- methyltransferase family	-	GO:0003674,GO:0003824,GO:0005488,GO:0005515,GO:0006725,GO:0008150,GO:0008152,GO:0008168,GO:0008171,GO:0009058,GO:0009698,GO:0009699,GO:0009808,GO:0009809,GO:0009987,GO:0016740,GO:0016741,GO:0019438,GO:0019748,GO:0032259,GO:0044237,GO:0044249,GO:0044550,GO:0046983,GO:0047763,GO:0071704,GO:1901360,GO:1901362,GO:1901576	ko:K13066,ko:K21553
Mt0013_00202	Medtr3g466410		79.3	76.48	73.54	15.99	14.47	16.61	76.44	15.69	-2.2845	2.20515e-99	2.71927e-97	L	Catalytic subunit of a heterodimeric structure-specific endonuclease that resolves DNA secondary structures generated during DNA repair and recombination. Has endonuclease activity towards branched DNA substrates, introducing single-strand cuts in duplex DNA close to junctions with ss-DNA	-	GO:0000228,GO:0000723,GO:0001325,GO:0003674,GO:0003824,GO:0004518,GO:0004519,GO:0004520,GO:0004536,GO:0005488,GO:0005575,GO:0005622,GO:0005623,GO:0005634,GO:0005654,GO:0005694,GO:0006139,GO:0006259,GO:0006281,GO:0006310,GO:0006725,GO:0006807,GO:0006950,GO:0006974,GO:0006996,GO:0008150,GO:0008152,GO:0008821,GO:0009893,GO:0009987,GO:0010604,GO:0010638,GO:0016043,GO:0016787,GO:0016788,GO:0016888,GO:…	ko:K15078
Mt0003_11570	Medtr4g086320		14.04	11.66	13.28	80.64	67.11	73.41	12.9933	73.72	2.5043	2.94531e-99	3.6192e-97	S	Cell number regulator	-	GO:0005575,GO:0008150,GO:0008285,GO:0016020,GO:0016021,GO:0031224,GO:0042127,GO:0044425,GO:0048519,GO:0048523,GO:0050789,GO:0050794,GO:0065007	-
Mt0003_10394	Medtr4g059837	NCR	176.35	186.34	216.49	23.61	23.97	25.58	193.06	24.3867	-2.9849	3.34415e-99	4.09489e-97	#N/A	#N/A	#N/A	#N/A	#N/A
Mt0086_10073	Medtr6g088415		20.49	19.38	23.26	1.28	0.98	0.95	21.0433	1.07	-4.2977	3.86196e-99	4.7124e-97	#N/A	#N/A	#N/A	#N/A	#N/A
Mt0079_10094	Medtr2g021242	MtGS2a	399.39	379.01	379.86	119.96	122.33	116.81	386.087	119.7	-1.6895	7.42159e-99	9.02434e-97	E	glutamine synthetase	GS2	GO:0000166,GO:0003674,GO:0003824,GO:0004356,GO:0005488,GO:0005524,GO:0005575,GO:0005576,GO:0005622,GO:0005623,GO:0005737,GO:0005739,GO:0005829,GO:0005840,GO:0006082,GO:0006520,GO:0006536,GO:0006541,GO:0006542,GO:0006807,GO:0006950,GO:0006970,GO:0007568,GO:0008144,GO:0008150,GO:0008152,GO:0008652,GO:0009058,GO:0009064,GO:0009084,GO:0009507,GO:0009526,GO:0009532,GO:0009534,GO:0009535,GO:0009536,GO:…	ko:K01915
Mt0013_00497	Medtr3g060280		10.19	9.03	11.3	82.19	91.08	93.23	10.1733	88.8333	3.1263	1.96545e-98	2.38161e-96	G	Belongs to the glycosyltransferase 2 family	-	GO:0000139,GO:0000271,GO:0000278,GO:0000281,GO:0000910,GO:0003674,GO:0003824,GO:0005575,GO:0005622,GO:0005623,GO:0005737,GO:0005783,GO:0005794,GO:0005886,GO:0005975,GO:0005976,GO:0006073,GO:0007049,GO:0008150,GO:0008152,GO:0008194,GO:0009058,GO:0009059,GO:0009250,GO:0009832,GO:0009833,GO:0009987,GO:0012505,GO:0016020,GO:0016021,GO:0016043,GO:0016051,GO:0016740,GO:0016757,GO:0016758,GO:0016759,GO:…	-
Mt0077_10063	Medtr2g069320		12.27	8.81	11.72	100.81	111.33	116.9	10.9333	109.68	3.3265	3.83299e-98	4.6285e-96	J	Elongation factor	-	-	ko:K03234
Mt0021_10194	Medtr7g008970	NCR	32.3	24.46	32.56	2.53	2.55	2.26	29.7733	2.44667	-3.6051	4.94616e-98	5.95211e-96	#N/A	#N/A	#N/A	#N/A	#N/A
Mt0026_10224	Medtr7g071310		61.8	64.67	76.9	5.73	6.42	6.68	67.79	6.27667	-3.433	6.32676e-98	7.58733e-96	#N/A	#N/A	#N/A	#N/A	#N/A
Mt0024_10120	Medtr6g084730	NCR191-TC31280	24.7	24.24	28.92	0.44	0.34	0.2	25.9533	0.326667	-6.312	1.13798e-97	1.36004e-95	#N/A	#N/A	#N/A	#N/A	#N/A
Mt0027_10388	Medtr2g078350		3.23	3.95	3.88	60.57	73.2	82.12	3.68667	71.9633	4.2869	1.81335e-97	2.15981e-95	S	Belongs to the Ca(2 ) cation antiporter (CaCA) (TC 2.A.19) family	-	-	-
Mt0002_11486	Medtr1g042200	NCR	30.64	28.55	33.7	3.2	3.32	3.62	30.9633	3.38	-3.1955	2.18939e-97	2.59882e-95	#N/A	#N/A	#N/A	#N/A	#N/A
Mt0005_01094	Medtr5g026850	MtIPD3	524.45	458.74	451.66	141.92	122.73	116.32	478.283	126.99	-1.9132	3.23358e-97	3.82527e-95	S	arbuscular mycorrhizal association	-	GO:0003674,GO:0005488,GO:0005515,GO:0005575,GO:0005622,GO:0005623,GO:0005634,GO:0008150,GO:0009877,GO:0036377,GO:0042802,GO:0042803,GO:0043226,GO:0043227,GO:0043229,GO:0043231,GO:0044403,GO:0044419,GO:0044424,GO:0044464,GO:0046983,GO:0051704	-
Mt0036_10188	Medtr7g114870		296.41	252.22	266.52	47.45	44.13	34.03	271.717	41.87	-2.6981	5.12558e-97	6.04299e-95	S	Protein of unknown function (DUF4005)	-	-	-
Mt0001_01039	Medtr4g112350		83.59	75.64	78.91	8.47	9.5	6.19	79.38	8.05333	-3.3011	1.33777e-96	1.5719e-94	Z	Belongs to the TRAFAC class myosin-kinesin ATPase superfamily. Kinesin family	-	GO:0000166,GO:0000226,GO:0003674,GO:0003774,GO:0003777,GO:0003824,GO:0005488,GO:0005515,GO:0005524,GO:0005575,GO:0005622,GO:0005623,GO:0005737,GO:0005856,GO:0005871,GO:0005874,GO:0005875,GO:0005929,GO:0005930,GO:0006928,GO:0006996,GO:0007010,GO:0007017,GO:0007018,GO:0007019,GO:0008017,GO:0008092,GO:0008144,GO:0008150,GO:0008574,GO:0009987,GO:0010938,GO:0015630,GO:0015631,GO:0016043,GO:0016462,GO:…	ko:K10401
Mt0088_00049	Medtr7g016800		17.11	21.75	20.87	217.37	243.41	201.71	19.91	220.83	3.4714	2.09092e-96	2.44862e-94	H	Belongs to the chalcone stilbene synthases family	CHS3	GO:0003674,GO:0003824,GO:0008150,GO:0008152,GO:0009058,GO:0009812,GO:0009813,GO:0016210,GO:0016740,GO:0016746,GO:0016747,GO:0071704,GO:1901576	ko:K00660
Mt0031_00284	Medtr7g103620		2613	2268.71	2216.33	814.08	774.53	745	2366.01	777.87	-1.6049	2.10952e-96	2.46214e-94	G	phosphopyruvate hydratase activity	-	GO:0000015,GO:0000287,GO:0001101,GO:0003674,GO:0003676,GO:0003677,GO:0003824,GO:0004634,GO:0005488,GO:0005507,GO:0005575,GO:0005576,GO:0005622,GO:0005623,GO:0005634,GO:0005737,GO:0005739,GO:0005740,GO:0005741,GO:0005829,GO:0005886,GO:0005911,GO:0005975,GO:0006082,GO:0006090,GO:0006091,GO:0006096,GO:0006139,GO:0006163,GO:0006164,GO:0006165,GO:0006351,GO:0006355,GO:0006725,GO:0006732,GO:0006733,GO:…	ko:K01689
Mt0016_10125	Medtr2g103307		351.56	368.41	397.4	60.88	67.51	61.63	372.457	63.34	-2.5559	7.52099e-96	8.74891e-94	S	Embryo-specific protein 3, (ATS3)	-	-	-
Mt0022_10204	Medtr7g056500		53.22	47.23	78.25	1.75	2.09	1.82	59.5667	1.88667	-4.9806	8.25055e-96	9.56571e-94	#N/A	#N/A	#N/A	#N/A	#N/A
Mt0005_10430	Medtr5g013440		15.03	15.54	13.7	89.31	84.91	93.78	14.7567	89.3333	2.5978	1.55045e-95	1.79164e-93	S	Belongs to the expansin family	-	GO:0000003,GO:0005575,GO:0005576,GO:0008150,GO:0019953,GO:0022414,GO:0044703,GO:0051704	-
Mt0057_10054	Medtr1g106420	MtLBD1	24.82	18.79	20.59	0.67	0.83	0.38	21.4	0.626667	-5.0938	3.42479e-95	3.9445e-93	S	LOB domain-containing protein	-	-	-
Mt0016_00567	Medtr2g091290		34.89	33.09	28.81	3.71	2.77	2.46	32.2633	2.98	-3.4365	3.77734e-95	4.33624e-93	S	FRIGIDA-like protein	-	-	ko:K10352
Mt0084_10027	Medtr6g445080	NCR	1590.06	1812.05	2106.84	117.16	117.63	152.46	1836.32	129.083	-3.8304	1.20485e-94	1.37858e-92	#N/A	#N/A	#N/A	#N/A	#N/A
Mt0007_10763	Medtr3g103580		2.67	2.96	3.54	140.74	200.36	293.81	3.05667	211.637	6.1135	1.4481e-94	1.65149e-92	E	Belongs to the class-IV pyridoxal-phosphate-dependent aminotransferase family	-	GO:0003674,GO:0003824,GO:0004084,GO:0005575,GO:0005622,GO:0005623,GO:0005737,GO:0005739,GO:0006082,GO:0006520,GO:0006549,GO:0006551,GO:0006552,GO:0006573,GO:0006574,GO:0006807,GO:0008150,GO:0008152,GO:0008483,GO:0008652,GO:0009056,GO:0009058,GO:0009063,GO:0009081,GO:0009082,GO:0009083,GO:0009097,GO:0009098,GO:0009099,GO:0009507,GO:0009536,GO:0009987,GO:0016053,GO:0016054,GO:0016740,GO:0016769,GO:…	ko:K00826
Mt0006_10395	Medtr3g082100		1005.7	894.56	943.89	257.84	237.32	203.19	948.05	232.783	-2.026	2.65941e-94	3.02306e-92	S	36.4 kDa proline-rich	-	-	-
Mt0022_10311	Medtr7g057560		101.53	118.85	122.29	14.54	15.33	13.77	114.223	14.5467	-2.9731	7.52175e-94	8.52253e-92	#N/A	#N/A	#N/A	#N/A	#N/A
Mt0030_10325	Medtr6g464450	NCR	63.22	62.15	71.11	8.47	9.77	9.29	65.4933	9.17667	-2.8353	1.93555e-93	2.18599e-91	#N/A	#N/A	#N/A	#N/A	#N/A
Mt0054_00181	Medtr6g463320	NCR	139.65	146.68	199.12	6.58	7.65	9.29	161.817	7.84	-4.3674	1.94628e-93	2.19101e-91	#N/A	#N/A	#N/A	#N/A	#N/A
Mt0005_10947	Medtr5g025100		805.99	827.55	805	222.93	203.03	184.72	812.847	203.56	-1.9975	3.26303e-93	3.66152e-91	Z	Belongs to the TRAFAC class myosin-kinesin ATPase superfamily. Kinesin family	-	GO:0000166,GO:0000226,GO:0000902,GO:0000904,GO:0001578,GO:0003002,GO:0003674,GO:0003774,GO:0003777,GO:0003779,GO:0003824,GO:0005488,GO:0005509,GO:0005515,GO:0005516,GO:0005524,GO:0005575,GO:0005622,GO:0005623,GO:0005737,GO:0005819,GO:0005856,GO:0005871,GO:0005874,GO:0005875,GO:0005881,GO:0005938,GO:0006928,GO:0006996,GO:0007010,GO:0007017,GO:0007018,GO:0007154,GO:0007267,GO:0007275,GO:0007389,GO:…	-
Mt0017_00056	Medtr6g078980		25.88	23.58	25	112.07	95.57	99.86	24.82	102.5	2.046	4.13482e-93	4.6249e-91	#N/A	#N/A	#N/A	#N/A	#N/A
Mt0054_00018	Medtr6g065570		0.39	0.22	0.45	44.32	68.19	71.7	0.353333	61.4033	7.4411	1.61154e-92	1.79679e-90	S	Miraculin-like	-	GO:0000302,GO:0001101,GO:0002237,GO:0002238,GO:0003674,GO:0004857,GO:0004866,GO:0004867,GO:0005575,GO:0005622,GO:0005623,GO:0005737,GO:0005739,GO:0006950,GO:0006952,GO:0006970,GO:0006979,GO:0008150,GO:0008219,GO:0009605,GO:0009607,GO:0009611,GO:0009617,GO:0009620,GO:0009624,GO:0009625,GO:0009628,GO:0009636,GO:0009651,GO:0009719,GO:0009725,GO:0009751,GO:0009892,GO:0009987,GO:0010033,GO:0010035,GO:…	-
Mt0001_00807	Medtr4g117050		313.76	362.26	379.69	48.36	44.83	50.75	351.903	47.98	-2.8747	2.32605e-92	2.58517e-90	S	Stem-specific protein	-	-	-
Mt0019_00504	Medtr2g090525		56.41	57.25	57.52	6.95	8.67	6.74	57.06	7.45333	-2.9365	4.70764e-92	5.21546e-90	S	Proton pump-interactor	-	-	-
Mt0008_01011	Medtr5g074970		20.42	23.36	25.14	420.63	631.12	676.54	22.9733	576.097	4.6483	4.98838e-92	5.509e-90	Q	Belongs to the peroxidase family. Classical plant (class III) peroxidase subfamily	-	GO:0003674,GO:0003824,GO:0004601,GO:0005488,GO:0005575,GO:0005576,GO:0006950,GO:0006979,GO:0008150,GO:0008152,GO:0009056,GO:0009636,GO:0009987,GO:0016209,GO:0016491,GO:0016684,GO:0016999,GO:0017001,GO:0017144,GO:0020037,GO:0042221,GO:0042737,GO:0042743,GO:0042744,GO:0043167,GO:0043169,GO:0044237,GO:0044248,GO:0046872,GO:0046906,GO:0048037,GO:0050896,GO:0051186,GO:0051187,GO:0051716,GO:0055114,GO:…	ko:K00430
Mt0004_00864	Medtr1g069915		22.82	26.72	21.88	0.84	0.52	0.38	23.8067	0.58	-5.3592	8.90141e-92	9.79942e-90	I	Patellin-4-like	-	GO:0003674,GO:0005488,GO:0005575,GO:0005622,GO:0005623,GO:0005634,GO:0005737,GO:0005829,GO:0005886,GO:0007049,GO:0008150,GO:0008289,GO:0009987,GO:0016020,GO:0043226,GO:0043227,GO:0043229,GO:0043231,GO:0044424,GO:0044444,GO:0044464,GO:0051301,GO:0071944	ko:K19996
Mt0022_10207	Medtr7g056490		239.09	238.37	305.97	18.89	18.1	23.99	261.143	20.3267	-3.6834	1.80711e-91	1.97694e-89	#N/A	#N/A	#N/A	#N/A	#N/A
Mt0002_00773	Medtr1g025340		12.63	13.75	18.93	243.57	303.85	255.76	15.1033	267.727	4.1478	2.05171e-91	2.23752e-89	S	Protein of unknown function (DUF668)	-	-	-
Mt0043_10165	Medtr3g028380	NCR	42.52	45.99	54.3	2.26	3.35	2.6	47.6033	2.73667	-4.1206	3.32355e-91	3.61324e-89	#N/A	#N/A	#N/A	#N/A	#N/A
Mt0001_11329	Medtr4g103800		463.71	446.68	427.88	100.57	111.95	96.3	446.09	102.94	-2.1155	6.29844e-91	6.82618e-89	F	Belongs to the adenylate kinase family	-	GO:0000166,GO:0003674,GO:0003824,GO:0004017,GO:0005488,GO:0005507,GO:0005524,GO:0005575,GO:0005622,GO:0005623,GO:0005737,GO:0005739,GO:0005773,GO:0005774,GO:0006139,GO:0006163,GO:0006725,GO:0006753,GO:0006793,GO:0006796,GO:0006807,GO:0008144,GO:0008150,GO:0008152,GO:0009058,GO:0009117,GO:0009123,GO:0009165,GO:0009507,GO:0009532,GO:0009536,GO:0009570,GO:0009987,GO:0010035,GO:0010038,GO:0016020,GO:…	ko:K00939
Mt0003_11337	Medtr4g081130		492.15	500.53	551.48	59.32	63.12	43.32	514.72	55.2533	-3.2197	1.34122e-90	1.44462e-88	H	Involved in biosynthesis of the thiamine precursor thiazole. Catalyzes the conversion of NAD and glycine to adenosine diphosphate 5-(2-hydroxyethyl)-4-methylthiazole-2-carboxylic acid (ADT), an adenylated thiazole intermediate. The reaction includes an iron-dependent sulfide transfer from a conserved cysteine residue of the protein to a thiazole intermediate. The enzyme can only undergo a single …	THI1	GO:0003674,GO:0005488,GO:0005506,GO:0005575,GO:0005622,GO:0005623,GO:0005737,GO:0005829,GO:0006725,GO:0006766,GO:0006767,GO:0006772,GO:0006790,GO:0006807,GO:0006950,GO:0008150,GO:0008152,GO:0009058,GO:0009110,GO:0009228,GO:0009507,GO:0009536,GO:0009987,GO:0017144,GO:0018130,GO:0018131,GO:0019438,GO:0034641,GO:0042364,GO:0042723,GO:0042724,GO:0043167,GO:0043169,GO:0043226,GO:0043227,GO:0043229,GO:…	ko:K03146
Mt0013_10415	Medtr3g462950		465.28	436.66	449.03	160.6	147.19	136.63	450.323	148.14	-1.604	2.5781e-90	2.76833e-88	O	Radical SAM ThiC family	-	-	ko:K03147
Mt0004_00962	Medtr1g071880	NCR126-TC35500	75.72	77.03	96.42	7.49	8.82	8.22	83.0567	8.17667	-3.3445	2.6663e-90	2.85223e-88	#N/A	#N/A	#N/A	#N/A	#N/A
Mt0094_00045	Medtr6g004520		129.5	117.17	127.11	41.42	39.73	38.92	124.593	40.0233	-1.6383	5.71042e-90	6.07568e-88	G	Belongs to the glucose-6-phosphate 1-epimerase family	-	GO:0003674,GO:0003824,GO:0005488,GO:0005975,GO:0008150,GO:0008152,GO:0016853,GO:0016854,GO:0016857,GO:0030246,GO:0044238,GO:0047938,GO:0071704	ko:K01792
Mt0082_00047	Medtr8g107370		96.1	84.74	82.55	7.52	8.27	4.89	87.7967	6.89333	-3.6709	6.94996e-90	7.35538e-88	I	Phosphoethanolamine N-methyltransferase	-	GO:0000003,GO:0000234,GO:0000902,GO:0000904,GO:0001505,GO:0003006,GO:0003674,GO:0003824,GO:0005575,GO:0005622,GO:0005623,GO:0005737,GO:0005829,GO:0006576,GO:0006629,GO:0006644,GO:0006650,GO:0006656,GO:0006793,GO:0006796,GO:0006807,GO:0006935,GO:0007275,GO:0008150,GO:0008152,GO:0008168,GO:0008170,GO:0008610,GO:0008654,GO:0008757,GO:0009058,GO:0009308,GO:0009309,GO:0009555,GO:0009605,GO:0009653,GO:…	ko:K05929
Mt0058_10143	Medtr7g095860	NCR040-TC33271	188.54	247.72	279	12.61	15.86	14.18	238.42	14.2167	-4.0679	6.95534e-90	7.35538e-88	#N/A	#N/A	#N/A	#N/A	#N/A
Mt0013_00305	Medtr3g464580		7372.17	8052.76	9539.16	186.67	241.19	347.83	8321.36	258.563	-5.0082	1.21614e-89	1.2822e-87	E	Asparagine synthetase	-	GO:0000166,GO:0003674,GO:0003824,GO:0004066,GO:0005488,GO:0005524,GO:0006082,GO:0006520,GO:0006528,GO:0006529,GO:0006541,GO:0006807,GO:0008144,GO:0008150,GO:0008152,GO:0008652,GO:0009058,GO:0009064,GO:0009066,GO:0009067,GO:0009987,GO:0016053,GO:0016874,GO:0016879,GO:0016884,GO:0017076,GO:0017144,GO:0019752,GO:0030554,GO:0032553,GO:0032555,GO:0032559,GO:0032787,GO:0034641,GO:0035639,GO:0036094,GO:…	ko:K01953
Mt0006_00095	Medtr3g087510		61.21	69.46	66.71	9.44	9.96	8.19	65.7933	9.19667	-2.8388	1.3965e-89	1.46792e-87	S	Lipoxygenase homology domain-containing protein	-	GO:0001101,GO:0001965,GO:0003674,GO:0003824,GO:0004096,GO:0004601,GO:0005215,GO:0005216,GO:0005261,GO:0005262,GO:0005488,GO:0005509,GO:0005515,GO:0005575,GO:0005622,GO:0005623,GO:0005737,GO:0005773,GO:0005774,GO:0005783,GO:0005886,GO:0006810,GO:0006811,GO:0006812,GO:0006816,GO:0006950,GO:0006970,GO:0008150,GO:0008152,GO:0008324,GO:0009266,GO:0009409,GO:0009414,GO:0009415,GO:0009507,GO:0009532,GO:…	-
Mt0008_00398	Medtr5g061160	NCR	28.68	28.52	31.97	1.62	2.12	2.46	29.7233	2.06667	-3.8462	1.65304e-89	1.73237e-87	#N/A	#N/A	#N/A	#N/A	#N/A
Mt0001_10499	Medtr4g124850		23.88	19.41	24.62	0.24	0.55	0.23	22.6367	0.34	-6.057	2.09928e-89	2.19343e-87	-	-	-	-	-
Mt0086_10096	Medtr7g065265		1.85	1.43	1.66	33.25	27.59	38.43	1.64667	33.09	4.3288	2.83546e-89	2.95379e-87	O	glutathione s-transferase	-	-	ko:K00799
Mt0061_00168	Medtr4g040330		1.53	1.39	1.84	21.69	20.83	22.43	1.58667	21.65	3.7703	4.03977e-89	4.19583e-87	T	serine threonine-protein kinase	-	GO:0000166,GO:0003002,GO:0003674,GO:0003824,GO:0004672,GO:0004674,GO:0004675,GO:0004888,GO:0005488,GO:0005524,GO:0005575,GO:0005622,GO:0005623,GO:0005737,GO:0005768,GO:0005886,GO:0006464,GO:0006468,GO:0006793,GO:0006796,GO:0006807,GO:0006810,GO:0006897,GO:0006898,GO:0006950,GO:0006952,GO:0007154,GO:0007165,GO:0007166,GO:0007167,GO:0007178,GO:0007275,GO:0007389,GO:0008144,GO:0008150,GO:0008152,GO:…	-
Mt0005_00786	Medtr5g021050		26.28	30.49	29.23	3	2.8	3.01	28.6667	2.93667	-3.2871	6.95846e-89	7.20583e-87	I	phosphatidylinositol phosphatidylcholine transfer protein	-	GO:0000003,GO:0000139,GO:0000226,GO:0003006,GO:0003674,GO:0005215,GO:0005319,GO:0005548,GO:0005575,GO:0005622,GO:0005623,GO:0005628,GO:0005634,GO:0005737,GO:0005794,GO:0005886,GO:0006810,GO:0006811,GO:0006820,GO:0006869,GO:0006996,GO:0007010,GO:0007017,GO:0007049,GO:0008104,GO:0008150,GO:0008525,GO:0008526,GO:0009653,GO:0009987,GO:0010876,GO:0010927,GO:0012505,GO:0015031,GO:0015711,GO:0015748,GO:…	-
Mt0025_00008	Medtr6g004880		2.2	1.94	3.43	70.69	73.75	96.76	2.52333	80.4	4.9938	4.95806e-88	5.11912e-86	S	galactinol--sucrose galactosyltransferase	-	GO:0001101,GO:0003674,GO:0003824,GO:0005575,GO:0005622,GO:0005623,GO:0005737,GO:0005975,GO:0006950,GO:0006979,GO:0008150,GO:0008152,GO:0008378,GO:0009414,GO:0009415,GO:0009507,GO:0009536,GO:0009628,GO:0009719,GO:0009725,GO:0009737,GO:0010033,GO:0010035,GO:0016740,GO:0016757,GO:0016758,GO:0033993,GO:0042221,GO:0043226,GO:0043227,GO:0043229,GO:0043231,GO:0044238,GO:0044424,GO:0044444,GO:0044464,GO:…	ko:K06617
Mt0002_10574	Medtr1g021955		78.05	69.46	71.32	20.4	19.97	20.86	72.9433	20.41	-1.8375	6.4182e-88	6.60715e-86	S	Mitochondrial calcium uniporter	-	-	ko:K20858
Mt0021_00185	Medtr7g007940	NCR	326.86	395.24	429.13	12.34	16.93	20.57	383.743	16.6133	-4.5297	1.72273e-87	1.76659e-85	#N/A	#N/A	#N/A	#N/A	#N/A
Mt0004_10155	Medtr1g080990		10.27	12.72	12.1	203.94	245.25	321.94	11.6967	257.043	4.4578	1.7262e-87	1.76659e-85	-	-	-	-	-
Mt0001_01398	Medtr4g103490		50.51	53.67	68.06	4.15	3.93	2.75	57.4133	3.61	-3.9913	2.10408e-87	2.14702e-85	G	PA domain	-	-	-
Mt0006_10636	Medtr3g076630		47.32	51.51	48.05	7.62	7.71	6.13	48.96	7.15333	-2.7749	2.41241e-87	2.45447e-85	C	Pyruvate dehydrogenase E1 component subunit	-	GO:0000003,GO:0003006,GO:0003674,GO:0003824,GO:0004738,GO:0004739,GO:0005488,GO:0005575,GO:0005622,GO:0005623,GO:0005737,GO:0005975,GO:0006082,GO:0006090,GO:0006091,GO:0006096,GO:0006139,GO:0006163,GO:0006164,GO:0006165,GO:0006629,GO:0006631,GO:0006633,GO:0006725,GO:0006732,GO:0006733,GO:0006753,GO:0006754,GO:0006757,GO:0006793,GO:0006796,GO:0006807,GO:0008150,GO:0008152,GO:0008270,GO:0008610,GO:…	ko:K00162
Mt0113_10014	Medtr0015s0030		5.11	4.94	5.69	37.81	38.81	41.09	5.24667	39.2367	2.9027	5.50291e-87	5.58257e-85	T	L-type lectin-domain containing receptor kinase	-	GO:0000166,GO:0003674,GO:0003824,GO:0004672,GO:0004674,GO:0005488,GO:0005524,GO:0005575,GO:0005623,GO:0005886,GO:0006464,GO:0006468,GO:0006793,GO:0006796,GO:0006807,GO:0008144,GO:0008150,GO:0008152,GO:0009987,GO:0016020,GO:0016021,GO:0016301,GO:0016310,GO:0016740,GO:0016772,GO:0016773,GO:0017076,GO:0019538,GO:0030246,GO:0030554,GO:0031224,GO:0032553,GO:0032555,GO:0032559,GO:0035639,GO:0036094,GO:…	-
Mt0018_10296	Medtr2g031750		151.84	153.44	163.79	38.92	37.09	33.04	156.357	36.35	-2.1048	8.97327e-87	9.07679e-85	E	Amino acid permease	-	-	-
Mt0001_11679	Medtr4g094775		82.88	55.35	80.26	660.56	734.19	690.81	72.83	695.187	3.2548	1.01542e-86	1.02416e-84	Q	Belongs to the cytochrome P450 family	-	GO:0001666,GO:0002213,GO:0002376,GO:0003674,GO:0003824,GO:0004497,GO:0005488,GO:0005506,GO:0005575,GO:0005622,GO:0005623,GO:0005737,GO:0005783,GO:0006082,GO:0006725,GO:0006790,GO:0006807,GO:0006950,GO:0006952,GO:0006955,GO:0008150,GO:0008152,GO:0009058,GO:0009605,GO:0009607,GO:0009617,GO:0009620,GO:0009628,GO:0009682,GO:0009759,GO:0009987,GO:0012505,GO:0016020,GO:0016021,GO:0016043,GO:0016143,GO:…	ko:K00512,ko:K00517,ko:K07418,ko:K13260,ko:K20623
Mt0026_10172	Medtr7g069980		66.64	71.55	78.91	12.38	11.92	11.08	72.3667	11.7933	-2.6174	1.01874e-86	1.02456e-84	P	Stores iron in a soluble, non-toxic, readily available form. Important for iron homeostasis. Iron is taken up in the ferrous form and deposited as ferric hydroxides after oxidation	FER1	GO:0000003,GO:0000041,GO:0000302,GO:0003006,GO:0003674,GO:0003824,GO:0004322,GO:0005488,GO:0005506,GO:0005515,GO:0005575,GO:0005622,GO:0005623,GO:0005737,GO:0005739,GO:0006810,GO:0006811,GO:0006812,GO:0006826,GO:0006873,GO:0006875,GO:0006879,GO:0006880,GO:0006950,GO:0006979,GO:0007275,GO:0008150,GO:0008152,GO:0008199,GO:0009266,GO:0009409,GO:0009507,GO:0009532,GO:0009534,GO:0009535,GO:0009536,GO:…	ko:K00522
Mt0020_00284	Medtr8g076680		5.7	5.08	5.44	40.94	45.17	48.47	5.40667	44.86	3.0526	2.30764e-86	2.31413e-84	I	Bifunctional epoxide hydrolase 2-like	-	-	-
Mt0010_00878	Medtr5g094570	CP450	1.06	0.99	1.25	27.45	35.43	38.63	1.1	33.8367	4.943	2.55196e-86	2.55182e-84	Q	Cytochrome p450	-	GO:0003674,GO:0003824,GO:0004497,GO:0005488,GO:0005506,GO:0005575,GO:0008150,GO:0008152,GO:0009058,GO:0016020,GO:0016491,GO:0016705,GO:0016709,GO:0019748,GO:0020037,GO:0043167,GO:0043169,GO:0044550,GO:0046872,GO:0046906,GO:0046914,GO:0048037,GO:0055114,GO:0097159,GO:1901363	ko:K00512,ko:K07408,ko:K07418
Mt0024_10398	Medtr6g091680		0.75	0.18	0.55	35.21	50.76	43.2	0.493333	43.0567	6.4475	3.29919e-86	3.28958e-84	Q	O-methyltransferase	-	-	ko:K00588
Mt0006_10532	Medtr3g078623		494.67	420.47	471.6	160.33	147.65	152.49	462.247	153.49	-1.5905	3.40385e-86	3.38426e-84	TZ	Belongs to the formin-like family	-	GO:0000902,GO:0003674,GO:0003779,GO:0005488,GO:0005515,GO:0005522,GO:0005575,GO:0005623,GO:0005886,GO:0005911,GO:0006996,GO:0007010,GO:0007015,GO:0008064,GO:0008092,GO:0008150,GO:0009653,GO:0009826,GO:0009932,GO:0009987,GO:0010638,GO:0016020,GO:0016021,GO:0016043,GO:0016049,GO:0030029,GO:0030036,GO:0030054,GO:0030832,GO:0030833,GO:0030838,GO:0031224,GO:0031334,GO:0032271,GO:0032273,GO:0032502,GO:…	-
Mt0033_10121	Medtr6g027155	NCR017-TC38410	65.85	56.78	72.32	10.69	10.51	11	64.9833	10.7333	-2.598	7.68867e-86	7.6227e-84	#N/A	#N/A	#N/A	#N/A	#N/A
Mt0168_10016	Medtr6g071400		3.66	2.85	2.6	58.68	93.23	86.26	3.03667	79.39	4.7084	1.02452e-85	1.01e-83	S	YLS9-like	-	-	-
Mt0007_00327	Medtr3g094630		1.89	2.38	2.43	26.17	27.41	23.99	2.23333	25.8567	3.5333	1.13998e-85	1.11917e-83	Q	Belongs to the peroxidase family. Classical plant (class III) peroxidase subfamily	-	-	ko:K00430
Mt0077_00074	Medtr2g069283		34.46	32.14	34.08	6.71	6.73	7.06	33.56	6.83333	-2.2961	1.14168e-85	1.11917e-83	#N/A	#N/A	#N/A	#N/A	#N/A
Mt0111_00033	Medtr8g059170		0.31	0.66	1.01	35.45	29.75	37.67	0.66	34.29	5.6992	1.65659e-85	1.61937e-83	K	NAC domain-containing protein	-	GO:0003674,GO:0003676,GO:0003677,GO:0005488,GO:0005575,GO:0005622,GO:0005623,GO:0005634,GO:0006139,GO:0006351,GO:0006355,GO:0006725,GO:0006807,GO:0008150,GO:0008152,GO:0009058,GO:0009059,GO:0009889,GO:0009987,GO:0010467,GO:0010468,GO:0010556,GO:0016070,GO:0018130,GO:0019219,GO:0019222,GO:0019438,GO:0031323,GO:0031326,GO:0032774,GO:0034641,GO:0034645,GO:0034654,GO:0043170,GO:0043226,GO:0043227,GO:…	-
Mt0048_10142	Medtr2g073170	NCR	91.15	87.12	101.69	14.13	13.21	15.97	93.32	14.4367	-2.6924	1.70273e-85	1.65982e-83	#N/A	#N/A	#N/A	#N/A	#N/A
Mt0071_10056	Medtr3g437870		33	33.49	31.48	158.41	169.5	173.58	32.6567	167.163	2.3558	2.02508e-85	1.96856e-83	I	ABC transporter A family member	-	-	-
Mt0088_10038	Medtr7g016060		776.68	852.56	940.84	46.31	59.43	70.26	856.693	58.6667	-3.8682	6.1759e-85	5.98685e-83	S	NADH-ubiquinone reductase complex 1 MLRQ subunit	-	-	-
Mt0037_10163	Medtr8g039130	NCR	309.67	323.84	414.29	13.63	12.84	20.72	349.267	15.73	-4.4727	7.97094e-85	7.69585e-83	#N/A	#N/A	#N/A	#N/A	#N/A
Mt0063_10031	Medtr5g075650		4.25	4.28	6.1	101.25	115.73	152.64	4.87667	123.207	4.659	7.98297e-85	7.69585e-83	#N/A	#N/A	#N/A	#N/A	#N/A
Mt0037_10274	Medtr8g041890		1.85	1.54	2.01	25.63	20.37	21.61	1.8	22.5367	3.6462	9.35332e-85	8.99207e-83	T	Cysteine-rich receptor-like protein kinase	-	-	-
Mt0008_00762	Medtr5g069500	NCR	74.23	81.27	89.28	9.38	10.51	10.94	81.5933	10.2767	-2.9891	2.70263e-84	2.59111e-82	#N/A	#N/A	#N/A	#N/A	#N/A
Mt0085_10044	Medtr7g028550	NCR	191.34	151.28	180.46	40.3	42.19	37.88	174.36	40.1233	-2.1196	4.15042e-84	3.96826e-82	#N/A	#N/A	#N/A	#N/A	#N/A
Mt0052_10095	Medtr6g078490		6.49	8.41	5.37	89.31	101.62	94.13	6.75667	95.02	3.8138	6.7034e-84	6.39168e-82	T	TMV resistance protein N-like	-	-	ko:K19613,ko:K22038
Mt0086_10080	Medtr7g065015		179.93	188.94	244.09	9.24	9.77	13.89	204.32	10.9667	-4.2196	1.82324e-83	1.73371e-81	#N/A	#N/A	#N/A	#N/A	#N/A
Mt0001_00779	Medtr4g117610		39.93	52.17	63.45	2.16	2.58	2.23	51.85	2.32333	-4.4801	2.88865e-83	2.73935e-81	Q	amine oxidase	-	GO:0003674,GO:0003824,GO:0005488,GO:0005507,GO:0006807,GO:0008131,GO:0008150,GO:0008152,GO:0009308,GO:0009987,GO:0010035,GO:0016491,GO:0016638,GO:0016641,GO:0042221,GO:0043167,GO:0043169,GO:0046872,GO:0046914,GO:0048037,GO:0048038,GO:0050896,GO:0051716,GO:0052593,GO:0052594,GO:0052595,GO:0052596,GO:0052597,GO:0055114,GO:0070887,GO:0071241,GO:0071704,GO:0097184,GO:0097185,GO:1901564,GO:1901698,GO:…	ko:K00276
Mt0022_00403	Medtr7g052640		147.83	130.88	145.62	13.42	15.21	9.11	141.443	12.58	-3.491	3.67806e-83	3.47851e-81	S	lipid-transfer protein	-	GO:0001101,GO:0002376,GO:0003674,GO:0005488,GO:0005504,GO:0005515,GO:0005575,GO:0005576,GO:0005622,GO:0005623,GO:0005737,GO:0005783,GO:0005911,GO:0006810,GO:0006869,GO:0006950,GO:0006952,GO:0006955,GO:0007154,GO:0007165,GO:0008150,GO:0008270,GO:0008289,GO:0009506,GO:0009605,GO:0009607,GO:0009627,GO:0009719,GO:0009725,GO:0009751,GO:0009814,GO:0009862,GO:0009863,GO:0009987,GO:0010033,GO:0010876,GO:…	-
Mt0007_00328	Medtr3g094670		0.63	0.18	0.28	25.02	24	20.86	0.363333	23.2933	6.0025	5.39154e-83	5.08524e-81	Q	Belongs to the peroxidase family. Classical plant (class III) peroxidase subfamily	-	-	ko:K00430
Mt0006_00440	Medtr3g079860		129.7	106.28	105.23	30.08	28.64	25.67	113.737	28.13	-2.0155	6.18207e-83	5.81515e-81	A	Ribonuclease 3-like protein	-	GO:0003674,GO:0003676,GO:0003723,GO:0003824,GO:0004518,GO:0004519,GO:0004521,GO:0004525,GO:0004540,GO:0005488,GO:0005575,GO:0005622,GO:0005623,GO:0005634,GO:0005737,GO:0006139,GO:0006396,GO:0006725,GO:0006807,GO:0008150,GO:0008152,GO:0009892,GO:0009987,GO:0010033,GO:0010467,GO:0010468,GO:0010605,GO:0010608,GO:0010629,GO:0014070,GO:0016070,GO:0016246,GO:0016441,GO:0016442,GO:0016458,GO:0016787,GO:…	-
Mt0084_10085	Medtr6g055200		41.07	39.3	45	182.96	176.6	168.06	41.79	175.873	2.0733	6.68937e-83	6.2586e-81	Q	Belongs to the multicopper oxidase family	-	GO:0000003,GO:0003006,GO:0003674,GO:0003824,GO:0005488,GO:0005507,GO:0005575,GO:0005576,GO:0006725,GO:0007275,GO:0008150,GO:0008152,GO:0009056,GO:0009698,GO:0009791,GO:0009808,GO:0009987,GO:0010035,GO:0010038,GO:0010228,GO:0016491,GO:0016679,GO:0016682,GO:0016722,GO:0019439,GO:0019748,GO:0022414,GO:0032501,GO:0032502,GO:0042221,GO:0043167,GO:0043169,GO:0044237,GO:0044248,GO:0046271,GO:0046274,GO:…	ko:K05909
Mt0042_10074	Medtr6g071070		1393.97	1609.44	1594.15	284.41	242.33	219.01	1532.52	248.583	-2.6241	6.7843e-83	6.33044e-81	E	glutamine synthetase	-	GO:0000166,GO:0003674,GO:0003824,GO:0004356,GO:0005488,GO:0005524,GO:0005575,GO:0005622,GO:0005623,GO:0005737,GO:0006082,GO:0006520,GO:0006541,GO:0006542,GO:0006807,GO:0008144,GO:0008150,GO:0008152,GO:0008652,GO:0009058,GO:0009064,GO:0009084,GO:0009987,GO:0016053,GO:0016211,GO:0016874,GO:0016879,GO:0016880,GO:0017076,GO:0019752,GO:0030554,GO:0032553,GO:0032555,GO:0032559,GO:0035639,GO:0036094,GO:…	ko:K01915
Mt0001_01653	Medtr4g097570		4.96	4.86	5.93	56.59	42.07	47.69	5.25	48.7833	3.216	1.04855e-82	9.75792e-81	K	transcription factor	-	GO:0000981,GO:0000988,GO:0000989,GO:0001067,GO:0001076,GO:0001101,GO:0001134,GO:0001135,GO:0003674,GO:0003676,GO:0003677,GO:0003700,GO:0005488,GO:0005575,GO:0005622,GO:0005623,GO:0005634,GO:0006139,GO:0006351,GO:0006355,GO:0006357,GO:0006725,GO:0006807,GO:0007275,GO:0008150,GO:0008152,GO:0009058,GO:0009059,GO:0009719,GO:0009725,GO:0009751,GO:0009889,GO:0009987,GO:0010033,GO:0010467,GO:0010468,GO:…	ko:K09422
Mt0008_10351	Medtr7g066220	NCR	37.69	37.44	47.15	4.08	4.43	4.46	40.76	4.32333	-3.2369	1.13351e-82	1.05206e-80	#N/A	#N/A	#N/A	#N/A	#N/A
Mt0002_00540	Medtr1g019440		8.61	4.57	5.03	119.12	136.16	158.51	6.07	137.93	4.5061	1.83475e-82	1.69838e-80	G	Belongs to the glycosyl hydrolase 13 family	-	GO:0001101,GO:0003674,GO:0003824,GO:0004553,GO:0004556,GO:0005488,GO:0005509,GO:0005575,GO:0005576,GO:0005975,GO:0008150,GO:0008152,GO:0009719,GO:0009725,GO:0009737,GO:0009739,GO:0010033,GO:0016160,GO:0016787,GO:0016798,GO:0033993,GO:0042221,GO:0043167,GO:0043169,GO:0044238,GO:0046872,GO:0048046,GO:0050896,GO:0071704,GO:0097305,GO:0103025,GO:1901700	ko:K01176
Mt0019_00259	Medtr2g085065		94.06	100.94	100.96	16.8	13.52	11.55	98.6533	13.9567	-2.8214	1.87872e-82	1.73449e-80	T	Belongs to the protein kinase superfamily	-	-	-
Mt0025_00066	Medtr6g006245	NCR245-TC29401	71.08	84.74	99.99	2.63	3.78	4.4	85.27	3.60333	-4.5646	2.94322e-82	2.71009e-80	#N/A	#N/A	#N/A	#N/A	#N/A
Mt0005_10340	Medtr5g011750		33.79	30.86	35.82	5.26	5.72	4.57	33.49	5.18333	-2.6918	4.65683e-82	4.27668e-80	S	endonuclease activity	-	-	-
Mt0028_10369	Medtr8g027160		46.46	46.69	44.93	176.25	179.21	178.24	46.0267	177.9	1.9505	4.73805e-82	4.33986e-80	P	Belongs to the cation transport ATPase (P-type) (TC 3.A.3) family	ECA2	GO:0000166,GO:0003674,GO:0003824,GO:0005215,GO:0005388,GO:0005488,GO:0005524,GO:0005575,GO:0005622,GO:0005623,GO:0005737,GO:0005783,GO:0005789,GO:0006810,GO:0006811,GO:0006812,GO:0006816,GO:0008144,GO:0008150,GO:0008324,GO:0012505,GO:0015075,GO:0015085,GO:0015318,GO:0015399,GO:0015405,GO:0015662,GO:0016020,GO:0016021,GO:0016462,GO:0016787,GO:0016817,GO:0016818,GO:0016887,GO:0017076,GO:0017111,GO:…	ko:K01537
Mt0043_10241	Medtr3g030420	NCR221-TC42842	30.53	33.78	42.06	1.11	1.29	1.82	35.4567	1.40667	-4.6557	4.8583e-82	4.43835e-80	#N/A	#N/A	#N/A	#N/A	#N/A
Mt0005_00555	Medtr5g016410	AtCYP81F2-like	1.53	0.66	1.04	23.81	27.5	25.26	1.07667	25.5233	4.5672	8.13423e-82	7.41171e-80	Q	Belongs to the cytochrome P450 family	-	GO:0001666,GO:0002213,GO:0002376,GO:0003674,GO:0003824,GO:0004497,GO:0005488,GO:0005506,GO:0005575,GO:0005622,GO:0005623,GO:0005737,GO:0005783,GO:0006082,GO:0006725,GO:0006790,GO:0006807,GO:0006950,GO:0006952,GO:0006955,GO:0008150,GO:0008152,GO:0009058,GO:0009605,GO:0009607,GO:0009617,GO:0009620,GO:0009628,GO:0009682,GO:0009759,GO:0009987,GO:0012505,GO:0016020,GO:0016021,GO:0016043,GO:0016143,GO:…	ko:K00512,ko:K00517,ko:K07418,ko:K13260,ko:K20623
Mt0011_00514	Medtr4g082160		45.63	42.04	43.27	10.56	10.02	8.39	43.6467	9.65667	-2.1763	1.874e-81	1.70309e-79	S	zinc finger	-	-	ko:K10569
Mt0036_10149	Medtr7g114100		45.63	43.43	42.58	11.8	11.4	10.27	43.88	11.1567	-1.9757	2.48634e-81	2.25372e-79	T	BONZAI 3-like	-	GO:0003674,GO:0005488,GO:0005543,GO:0005544,GO:0005575,GO:0005623,GO:0005886,GO:0006950,GO:0006952,GO:0008150,GO:0008289,GO:0009987,GO:0010118,GO:0010941,GO:0016020,GO:0043167,GO:0043168,GO:0044464,GO:0048519,GO:0048523,GO:0050789,GO:0050794,GO:0050896,GO:0060548,GO:0065007,GO:0071944,GO:0090332	-
Mt0057_00033	Medtr1g106785		19.04	20.36	19.24	90.89	91.82	91.84	19.5467	91.5167	2.2271	2.76564e-81	2.49394e-79	S	Somatic embryogenesis receptor kinase	-	GO:0000003,GO:0000166,GO:0003006,GO:0003674,GO:0003824,GO:0004672,GO:0004674,GO:0004675,GO:0004713,GO:0004714,GO:0004888,GO:0005102,GO:0005488,GO:0005515,GO:0005524,GO:0005575,GO:0005622,GO:0005623,GO:0005737,GO:0005783,GO:0005789,GO:0005886,GO:0006464,GO:0006468,GO:0006793,GO:0006796,GO:0006807,GO:0006996,GO:0007030,GO:0007049,GO:0007154,GO:0007165,GO:0007166,GO:0007167,GO:0007178,GO:0007275,GO:…	-
Mt0001_11892	Medtr4g093040		1.22	1.43	1.53	23.88	24.18	29.6	1.39333	25.8867	4.2156	6.38514e-81	5.74301e-79	T	L-type lectin-domain containing receptor kinase IX.1-like	-	-	-
Mt0010_01072	Medtr5g098170		14.95	14.37	16.5	123.54	149.47	162.47	15.2733	145.16	3.2486	8.51252e-81	7.63676e-79	S	Belongs to the class I-like SAM-binding methyltransferase superfamily. Cation-independent O- methyltransferase family	-	-	ko:K13066,ko:K21553
Mt0007_10626	Medtr3g100890		89.02	76.81	80.82	27.69	26.67	24.86	82.2167	26.4067	-1.6385	1.1862e-80	1.06144e-78	H	Catalyzes the epimerization of the S- and R-forms of NAD(P)HX, a damaged form of NAD(P)H that is a result of enzymatic or heat-dependent hydration. This is a prerequisite for the S- specific NAD(P)H-hydrate dehydratase to allow the repair of both epimers of NAD(P)HX	-	GO:0000166,GO:0003674,GO:0003824,GO:0004733,GO:0005488,GO:0005515,GO:0005575,GO:0005576,GO:0005615,GO:0005622,GO:0005623,GO:0005634,GO:0005654,GO:0005737,GO:0005739,GO:0005759,GO:0005829,GO:0005929,GO:0006081,GO:0006139,GO:0006725,GO:0006732,GO:0006733,GO:0006734,GO:0006739,GO:0006753,GO:0006766,GO:0006767,GO:0006793,GO:0006796,GO:0006807,GO:0008150,GO:0008152,GO:0008614,GO:0008615,GO:0009058,GO:…	ko:K00275,ko:K17759
Mt0022_10270	Medtr7g056047		31.04	27.24	29.05	6.31	6.48	5.73	29.11	6.17333	-2.2374	2.16276e-80	1.93033e-78	#N/A	#N/A	#N/A	#N/A	#N/A
Mt0043_10221	Medtr3g030060	NCR103-TC36312	200.62	213.47	227.06	45.06	43.27	46.67	213.717	45	-2.2477	7.98138e-80	7.0694e-78	#N/A	#N/A	#N/A	#N/A	#N/A
Mt0003_01633	Medtr4g088255	NCR116-TC34696	160.06	197.71	206.36	13.46	15.86	18.03	188.043	15.7833	-3.5746	8.03864e-80	7.10208e-78	#N/A	#N/A	#N/A	#N/A	#N/A
Mt0048_00119	Medtr2g073520		3.11	3.95	3.85	35.95	41.88	39.41	3.63667	39.08	3.4257	9.67459e-80	8.52585e-78	T	leucine-rich repeat receptor-like serine threonine-protein kinase	-	GO:0000166,GO:0002376,GO:0002682,GO:0003674,GO:0003824,GO:0004672,GO:0004674,GO:0005488,GO:0005524,GO:0005575,GO:0005623,GO:0005886,GO:0005911,GO:0006464,GO:0006468,GO:0006793,GO:0006796,GO:0006807,GO:0006950,GO:0006952,GO:0006955,GO:0008144,GO:0008150,GO:0008152,GO:0009506,GO:0009605,GO:0009607,GO:0009611,GO:0009814,GO:0009861,GO:0009987,GO:0016020,GO:0016021,GO:0016301,GO:0016310,GO:0016740,GO:…	-
Mt0002_00700	Medtr1g023120		226.07	185.87	208.96	34.57	38.2	27.58	206.967	33.45	-2.6293	1.30697e-79	1.14888e-77	G	beta-galactosidase	-	-	-
Mt0039_10251	Medtr1g086450		6.84	5.3	5.34	35.41	34.54	36.26	5.82667	35.4033	2.6031	1.34706e-79	1.18115e-77	#N/A	#N/A	#N/A	#N/A	#N/A
Mt0014_10545	Medtr6g006350	NCR309-TC42369	63.61	60.14	71.32	5.4	7.31	7.29	65.0233	6.66667	-3.2859	1.6437e-79	1.43764e-77	#N/A	#N/A	#N/A	#N/A	#N/A
Mt0003_00432	Medtr4g060610	NCR	68.72	77.4	86.09	11.43	9.83	11.02	77.4033	10.76	-2.8467	1.69349e-79	1.47749e-77	#N/A	#N/A	#N/A	#N/A	#N/A
Mt0015_10111	Medtr8g007235		791.31	706.72	656.5	245.09	233.6	226.71	718.177	235.133	-1.6109	1.73083e-79	1.50629e-77	F	Nucleoside diphosphate kinase	NDPK1	GO:0000166,GO:0000302,GO:0003674,GO:0003824,GO:0004550,GO:0005488,GO:0005524,GO:0005575,GO:0005622,GO:0005623,GO:0005634,GO:0005737,GO:0005777,GO:0006139,GO:0006163,GO:0006164,GO:0006165,GO:0006183,GO:0006213,GO:0006220,GO:0006221,GO:0006228,GO:0006241,GO:0006725,GO:0006753,GO:0006793,GO:0006796,GO:0006807,GO:0006950,GO:0006979,GO:0008144,GO:0008150,GO:0008152,GO:0009058,GO:0009116,GO:0009117,GO:…	ko:K00940
Mt0011_10721	Medtr7g079720	MtPIN9	42.52	49.9	46.04	2.06	1.35	0.72	46.1533	1.37667	-5.0672	1.78611e-79	1.55054e-77	P	auxin efflux carrier component	-	GO:0003674,GO:0005215,GO:0005575,GO:0005622,GO:0005623,GO:0005737,GO:0005783,GO:0005789,GO:0005886,GO:0006810,GO:0007154,GO:0007165,GO:0007275,GO:0008150,GO:0009555,GO:0009719,GO:0009725,GO:0009733,GO:0009734,GO:0009755,GO:0009914,GO:0009926,GO:0009966,GO:0009987,GO:0010033,GO:0010252,GO:0010315,GO:0010329,GO:0010646,GO:0010817,GO:0010928,GO:0012505,GO:0015562,GO:0016020,GO:0016021,GO:0022857,GO:…	ko:K13947
Mt0007_10826	Medtr3g104990		74.31	38.9	52.56	2.19	2.73	1.85	55.2567	2.25667	-4.6139	2.49119e-79	2.15726e-77	M	Mechanosensitive ion channel protein 10-like	-	GO:0000302,GO:0003674,GO:0005215,GO:0005575,GO:0005623,GO:0005886,GO:0006810,GO:0006811,GO:0006820,GO:0006950,GO:0006979,GO:0007275,GO:0007568,GO:0008150,GO:0008219,GO:0008381,GO:0009581,GO:0009582,GO:0009605,GO:0009612,GO:0009628,GO:0009987,GO:0010150,GO:0012501,GO:0015267,GO:0016020,GO:0016021,GO:0022803,GO:0022836,GO:0022857,GO:0031224,GO:0032501,GO:0032502,GO:0033554,GO:0034599,GO:0034614,GO:…	ko:K22048
Mt0056_00185	Medtr2g041380	NCR	100.63	88.77	127.38	4.62	4.58	7.06	105.593	5.42	-4.2841	3.31199e-79	2.86094e-77	#N/A	#N/A	#N/A	#N/A	#N/A
Mt0011_10056	Medtr7g093600		92.48	94.1	91.39	27.45	26.4	26.33	92.6567	26.7267	-1.7936	4.17108e-79	3.59413e-77	O	E3 ubiquitin-protein ligase that mediates ubiquitination and subsequent proteasomal degradation of target proteins. E3 ubiquitin ligases accept ubiquitin from an E2 ubiquitin- conjugating enzyme in the form of a thioester and then directly transfers the ubiquitin to targeted substrates	-	GO:0003674,GO:0003824,GO:0004842,GO:0005488,GO:0005515,GO:0005575,GO:0005622,GO:0005623,GO:0005634,GO:0005737,GO:0006464,GO:0006508,GO:0006511,GO:0006807,GO:0007275,GO:0008150,GO:0008152,GO:0008270,GO:0009056,GO:0009057,GO:0009894,GO:0009987,GO:0010506,GO:0016241,GO:0016567,GO:0016740,GO:0019222,GO:0019538,GO:0019787,GO:0019941,GO:0030163,GO:0031323,GO:0031329,GO:0032446,GO:0032501,GO:0032502,GO:…	ko:K04506
Mt0013_00714	Medtr3g055510	MtCAML5	221.82	186.05	178	13.86	19.91	19.97	195.29	17.9133	-3.4465	6.80793e-79	5.8518e-77	DTZ	Calcium-binding protein	CMD1	GO:0000003,GO:0000131,GO:0000226,GO:0000331,GO:0000741,GO:0000742,GO:0000746,GO:0000747,GO:0003674,GO:0005488,GO:0005509,GO:0005515,GO:0005575,GO:0005622,GO:0005623,GO:0005737,GO:0005773,GO:0005815,GO:0005816,GO:0005823,GO:0005856,GO:0005933,GO:0005934,GO:0005935,GO:0005937,GO:0006606,GO:0006607,GO:0006629,GO:0006644,GO:0006650,GO:0006661,GO:0006793,GO:0006796,GO:0006810,GO:0006886,GO:0006897,GO:…	ko:K02183,ko:K13448
Mt0058_10136	Medtr7g095970		21.2	21.79	22.5	0.17	0.18	0.2	21.83	0.183333	-6.8957	6.84044e-79	5.8653e-77	T	Belongs to the DEFL family	-	-	-
Mt0045_00148	Medtr4g014790	NCR	32.37	24.82	31.62	2.93	2.24	3.24	29.6033	2.80333	-3.4005	9.75995e-79	8.34811e-77	#N/A	#N/A	#N/A	#N/A	#N/A
Mt0021_00235	Medtr7g009060		283.62	265.6	285.41	63.98	54.7	45.57	278.21	54.75	-2.3452	1.2502e-78	1.06674e-76	Z	Belongs to the histidine acid phosphatase family	-	GO:0000166,GO:0000827,GO:0000828,GO:0000829,GO:0000832,GO:0002376,GO:0002682,GO:0002684,GO:0002831,GO:0002833,GO:0003674,GO:0003824,GO:0005488,GO:0005524,GO:0005575,GO:0005622,GO:0005623,GO:0005634,GO:0005654,GO:0005737,GO:0005829,GO:0005886,GO:0005975,GO:0006020,GO:0006066,GO:0006793,GO:0006796,GO:0006950,GO:0006952,GO:0006955,GO:0008144,GO:0008150,GO:0008152,GO:0009058,GO:0009605,GO:0009607,GO:…	ko:K13024
Mt0018_00234	Medtr2g029850		224.74	207.25	201.58	648.72	615.45	575.44	211.19	613.203	1.5378	1.50074e-78	1.27739e-76	Q	Removal of H(2)O(2), oxidation of toxic reductants, biosynthesis and degradation of lignin, suberization, auxin catabolism, response to environmental stresses such as wounding, pathogen attack and oxidative stress	-	GO:0000902,GO:0002682,GO:0002684,GO:0003674,GO:0003824,GO:0004601,GO:0005488,GO:0005575,GO:0005576,GO:0005618,GO:0005622,GO:0005623,GO:0005737,GO:0005773,GO:0005774,GO:0005794,GO:0006950,GO:0006952,GO:0006970,GO:0006979,GO:0008150,GO:0008152,GO:0009056,GO:0009314,GO:0009416,GO:0009505,GO:0009605,GO:0009607,GO:0009617,GO:0009620,GO:0009628,GO:0009636,GO:0009651,GO:0009653,GO:0009719,GO:0009725,GO:…	ko:K00430
Mt0068_10071	Medtr2g022760		28.21	24.46	25.03	91.3	92.1	89.35	25.9	90.9167	1.8116	2.53833e-78	2.1553e-76	G	Belongs to the glycosyl hydrolase 1 family	-	GO:0003674,GO:0003824,GO:0004553,GO:0005975,GO:0006725,GO:0008150,GO:0008152,GO:0008422,GO:0009058,GO:0009698,GO:0009699,GO:0009808,GO:0009809,GO:0009987,GO:0015926,GO:0016787,GO:0016798,GO:0019438,GO:0019748,GO:0044237,GO:0044238,GO:0044249,GO:0044550,GO:0047782,GO:0071704,GO:0102483,GO:1901135,GO:1901360,GO:1901362,GO:1901576,GO:1901657	ko:K05350
Mt0137_00012	Medtr2g041180		1.34	1.61	2.25	44.86	30.82	39.55	1.73333	38.41	4.4699	2.55702e-78	2.16589e-76	S	Plant protein of unknown function	-	-	-
Mt0072_10041	Medtr2g060950		24.04	19.82	23.44	3.78	3.04	3.21	22.4333	3.34333	-2.7463	3.87297e-78	3.27261e-76	#N/A	#N/A	#N/A	#N/A	#N/A
Mt0010_00331	Medtr5g083860		3.82	2.56	4.13	49.78	67.73	59.9	3.50333	59.1367	4.0773	5.68498e-78	4.79214e-76	Q	Belongs to the peroxidase family. Classical plant (class III) peroxidase subfamily	-	-	ko:K00430
Mt0037_10148	Medtr8g038715	NCR	18.92	20	23.26	1.45	1.23	1.68	20.7267	1.45333	-3.8341	6.54691e-78	5.5054e-76	#N/A	#N/A	#N/A	#N/A	#N/A
Mt0252_10002	Medtr0192s0050	NCR	15.54	15.94	17.2	0.57	0.4	0.84	16.2267	0.603333	-4.7493	7.76579e-78	6.51468e-76	#N/A	#N/A	#N/A	#N/A	#N/A
Mt0004_10695	Medtr1g064090		101.65	126.75	108.52	848.89	991.02	900.53	112.307	913.48	3.0239	8.48475e-78	7.10074e-76	Q	phenylalanine	PAL	GO:0001101,GO:0003674,GO:0003824,GO:0005575,GO:0005622,GO:0005623,GO:0005737,GO:0006082,GO:0006464,GO:0006508,GO:0006511,GO:0006520,GO:0006558,GO:0006559,GO:0006725,GO:0006807,GO:0008150,GO:0008152,GO:0009056,GO:0009057,GO:0009058,GO:0009063,GO:0009072,GO:0009074,GO:0009636,GO:0009698,GO:0009699,GO:0009719,GO:0009725,GO:0009739,GO:0009800,GO:0009803,GO:0009987,GO:0010033,GO:0010243,GO:0014070,GO:…	ko:K10775,ko:K13064
Mt0057_10231	Medtr1g103540		34.66	29.83	28.43	6.91	6.02	5.96	30.9733	6.29667	-2.2984	9.14355e-78	7.63377e-76	S	Folate-biopterin transporter 1	-	GO:0003674,GO:0005215,GO:0005310,GO:0005342,GO:0005575,GO:0005622,GO:0005623,GO:0005737,GO:0006810,GO:0006811,GO:0006820,GO:0006835,GO:0006855,GO:0008150,GO:0008509,GO:0008514,GO:0008517,GO:0009507,GO:0009526,GO:0009536,GO:0009941,GO:0015075,GO:0015231,GO:0015238,GO:0015318,GO:0015350,GO:0015711,GO:0015849,GO:0015884,GO:0015885,GO:0015893,GO:0016020,GO:0016021,GO:0022857,GO:0031090,GO:0031224,GO:…	-
Mt0028_10181	Medtr8g021020		2.44	3.33	5.13	114.53	152.76	159.23	3.63333	142.173	5.2902	1.0406e-77	8.66704e-76	E	Plant lipoxygenase may be involved in a number of diverse aspects of plant physiology including growth and development, pest resistance, and senescence or responses to wounding	LOX2	-	ko:K00454,ko:K15718
Mt0040_00046	Medtr3g110450		21.44	17.58	22.43	134.77	163.66	152.98	20.4833	150.47	2.877	1.15728e-77	9.61593e-76	T	Belongs to the protein kinase superfamily. Ser Thr protein kinase family	-	GO:0000166,GO:0003674,GO:0003824,GO:0004672,GO:0004674,GO:0005488,GO:0005524,GO:0005575,GO:0005623,GO:0005886,GO:0006464,GO:0006468,GO:0006793,GO:0006796,GO:0006807,GO:0008144,GO:0008150,GO:0008152,GO:0009987,GO:0016020,GO:0016021,GO:0016301,GO:0016310,GO:0016740,GO:0016772,GO:0016773,GO:0017076,GO:0019538,GO:0030554,GO:0031224,GO:0032553,GO:0032555,GO:0032559,GO:0035639,GO:0036094,GO:0036211,GO:…	ko:K00924
Mt0006_00315	Medtr3g082700		54.4	50.41	54.47	208.63	218.46	190.02	53.0933	205.703	1.954	1.56421e-77	1.29662e-75	P	Inorganic phosphate transporter	-	GO:0003674,GO:0005215,GO:0005315,GO:0005575,GO:0005623,GO:0005886,GO:0005887,GO:0006810,GO:0006811,GO:0006817,GO:0006820,GO:0006950,GO:0007154,GO:0008150,GO:0008509,GO:0009267,GO:0009605,GO:0009987,GO:0009991,GO:0015075,GO:0015103,GO:0015114,GO:0015291,GO:0015293,GO:0015318,GO:0015698,GO:0016020,GO:0016021,GO:0016036,GO:0022804,GO:0022857,GO:0031224,GO:0031226,GO:0031667,GO:0031668,GO:0031669,GO:…	ko:K08176
Mt0046_10058	Medtr8g028795		81.11	87.74	84.81	15.72	17.52	16.61	84.5533	16.6167	-2.3472	1.62165e-77	1.34105e-75	PQ	Ferric reduction oxidase	-	GO:0000293,GO:0003674,GO:0003824,GO:0005488,GO:0005575,GO:0005622,GO:0005623,GO:0005737,GO:0005739,GO:0005740,GO:0005886,GO:0006810,GO:0006811,GO:0008150,GO:0008152,GO:0009605,GO:0009607,GO:0009617,GO:0015688,GO:0016020,GO:0016021,GO:0016491,GO:0016722,GO:0016723,GO:0031090,GO:0031224,GO:0031966,GO:0031967,GO:0031975,GO:0042592,GO:0043167,GO:0043169,GO:0043207,GO:0043226,GO:0043227,GO:0043229,GO:…	ko:K00521
Mt0003_00556	Medtr4g063770	NCR	124.94	125.62	150.61	14.5	15.7	18.46	133.723	16.22	-3.0434	2.41049e-77	1.98869e-75	#N/A	#N/A	#N/A	#N/A	#N/A
Mt0097_10039	Medtr4g019090		190.55	191.13	175.16	53.25	54.36	52.75	185.613	53.4533	-1.7959	3.21687e-77	2.64769e-75	Z	Tubulin is the major constituent of microtubules. It binds two moles of GTP, one at an exchangeable site on the beta chain and one at a non-exchangeable site on the alpha chain	-	GO:0000166,GO:0001882,GO:0001883,GO:0003674,GO:0003824,GO:0003924,GO:0005198,GO:0005200,GO:0005488,GO:0005525,GO:0005575,GO:0005622,GO:0005623,GO:0005737,GO:0005856,GO:0005874,GO:0006996,GO:0007010,GO:0007017,GO:0008150,GO:0009987,GO:0015630,GO:0016043,GO:0016462,GO:0016787,GO:0016817,GO:0016818,GO:0017076,GO:0017111,GO:0019001,GO:0032549,GO:0032550,GO:0032553,GO:0032555,GO:0032561,GO:0035639,GO:…	ko:K07375
Mt0028_00066	Medtr8g018290		260.38	244.8	237.91	71.23	68.5	57	247.697	65.5767	-1.9173	5.95858e-77	4.89276e-75	P	Belongs to the cation transport ATPase (P-type) (TC 3.A.3) family. Type IV subfamily	-	GO:0000139,GO:0000166,GO:0000287,GO:0003674,GO:0003824,GO:0004012,GO:0005215,GO:0005319,GO:0005488,GO:0005524,GO:0005548,GO:0005575,GO:0005622,GO:0005623,GO:0005737,GO:0005794,GO:0005802,GO:0005886,GO:0006810,GO:0006811,GO:0006820,GO:0006869,GO:0006900,GO:0006996,GO:0008144,GO:0008150,GO:0009987,GO:0010876,GO:0012505,GO:0015711,GO:0015748,GO:0015914,GO:0016020,GO:0016021,GO:0016043,GO:0016050,GO:…	ko:K01530
Mt0014_00762	Medtr4g020520		2.12	2.85	3.54	41.21	35.62	39.32	2.83667	38.7167	3.7707	6.25602e-77	5.12494e-75	T	TMV resistance protein N-like	-	GO:0000166,GO:0002376,GO:0003674,GO:0005488,GO:0005524,GO:0005575,GO:0005622,GO:0005623,GO:0005737,GO:0006950,GO:0006952,GO:0006955,GO:0007154,GO:0007165,GO:0008144,GO:0008150,GO:0008219,GO:0009626,GO:0009987,GO:0012501,GO:0017076,GO:0023052,GO:0030554,GO:0032553,GO:0032555,GO:0032559,GO:0033554,GO:0034050,GO:0035639,GO:0036094,GO:0043167,GO:0043168,GO:0043531,GO:0044424,GO:0044464,GO:0045087,GO:…	-
Mt0020_00127	Medtr8g073335		311.55	318.8	326.92	94.6	94.34	92.65	319.09	93.8633	-1.7653	9.50304e-77	7.76667e-75	U	WD40 repeats	-	GO:0000149,GO:0002791,GO:0003674,GO:0005096,GO:0005488,GO:0005515,GO:0005575,GO:0005622,GO:0005623,GO:0005737,GO:0005829,GO:0005886,GO:0006810,GO:0006887,GO:0008021,GO:0008047,GO:0008104,GO:0008150,GO:0009987,GO:0012505,GO:0012506,GO:0015031,GO:0015833,GO:0016020,GO:0016021,GO:0016192,GO:0017016,GO:0017075,GO:0017137,GO:0017157,GO:0019899,GO:0019905,GO:0030054,GO:0030133,GO:0030141,GO:0030234,GO:…	-
Mt0018_10325	Medtr2g032710		192.75	180.46	191.7	57.47	60.17	58.25	188.303	58.63	-1.6833	1.16401e-76	9.49104e-75	#N/A	#N/A	#N/A	#N/A	#N/A
Mt0005_10464	Medtr5g014150		199.09	206.41	211.77	18.35	14.6	9.35	205.757	14.1	-3.8672	1.73452e-76	1.40771e-74	E	Protein NRT1 PTR FAMILY	-	GO:0001101,GO:0003674,GO:0005215,GO:0005451,GO:0005575,GO:0005623,GO:0005886,GO:0006810,GO:0006811,GO:0006812,GO:0006813,GO:0006820,GO:0007275,GO:0007568,GO:0008150,GO:0008324,GO:0008509,GO:0009987,GO:0010035,GO:0010150,GO:0010167,GO:0015075,GO:0015077,GO:0015078,GO:0015079,GO:0015103,GO:0015112,GO:0015291,GO:0015293,GO:0015297,GO:0015298,GO:0015299,GO:0015318,GO:0015386,GO:0015491,GO:0015672,GO:…	ko:K14638
Mt0003_11601	Medtr4g087100	GA20ox	4.05	3.47	3.85	27.99	32.67	30.87	3.79	30.51	3.009	1.94221e-76	1.5726e-74	Q	Belongs to the iron ascorbate-dependent oxidoreductase family	-	GO:0003674,GO:0003824,GO:0005488,GO:0005575,GO:0005622,GO:0005623,GO:0005737,GO:0008150,GO:0008152,GO:0009058,GO:0009812,GO:0009813,GO:0016491,GO:0016705,GO:0016706,GO:0016740,GO:0019842,GO:0030246,GO:0031406,GO:0031418,GO:0036094,GO:0043167,GO:0043168,GO:0043169,GO:0043177,GO:0044424,GO:0044464,GO:0045486,GO:0046872,GO:0048029,GO:0048037,GO:0050662,GO:0051213,GO:0055114,GO:0071704,GO:1901576	-
Mt0024_10311	Medtr6g088665		31.86	36.96	36.16	213.93	241.04	229.6	34.9933	228.19	2.7051	2.03549e-76	1.64432e-74	Q	Belongs to the iron ascorbate-dependent oxidoreductase family	-	GO:0000166,GO:0003674,GO:0003824,GO:0004672,GO:0004674,GO:0005488,GO:0005524,GO:0005575,GO:0005623,GO:0005886,GO:0006464,GO:0006468,GO:0006793,GO:0006796,GO:0006807,GO:0007275,GO:0008144,GO:0008150,GO:0008152,GO:0009653,GO:0009791,GO:0009987,GO:0010015,GO:0010101,GO:0010102,GO:0010468,GO:0016020,GO:0016021,GO:0016301,GO:0016310,GO:0016740,GO:0016772,GO:0016773,GO:0017076,GO:0019222,GO:0019538,GO:…	-
Mt0003_10440	Medtr4g060730	NCR074= NCRa	83.4	118.52	162.61	1.45	2.21	2.84	121.51	2.16667	-5.8095	3.12116e-76	2.51553e-74	#N/A	#N/A	#N/A	#N/A	#N/A
Mt0088_10100	Medtr7g017630		721.73	719.04	829.23	177.84	178.02	156.11	756.667	170.657	-2.1486	7.19145e-76	5.78265e-74	E	sodium-coupled neutral amino acid transporter	-	GO:0000302,GO:0003333,GO:0003674,GO:0005215,GO:0005342,GO:0005575,GO:0005622,GO:0005623,GO:0005737,GO:0005773,GO:0005774,GO:0006810,GO:0006811,GO:0006820,GO:0006865,GO:0006950,GO:0006979,GO:0008150,GO:0008509,GO:0008514,GO:0009719,GO:0009723,GO:0009725,GO:0009987,GO:0010033,GO:0010035,GO:0010038,GO:0010039,GO:0015075,GO:0015171,GO:0015318,GO:0015711,GO:0015849,GO:0016020,GO:0016021,GO:0022857,GO:…	ko:K14207
Mt0006_10214	Medtr3g086000		199.95	214.13	210.32	55.78	54.45	54.86	208.133	55.03	-1.9192	9.196e-76	7.37752e-74	O	thimet oligopeptidase	-	GO:0003674,GO:0003824,GO:0004175,GO:0004222,GO:0005488,GO:0005575,GO:0005622,GO:0005623,GO:0005737,GO:0005739,GO:0005740,GO:0005758,GO:0005829,GO:0005886,GO:0006109,GO:0006111,GO:0006508,GO:0006518,GO:0006807,GO:0008150,GO:0008152,GO:0008233,GO:0008237,GO:0009889,GO:0009987,GO:0010675,GO:0010830,GO:0010906,GO:0016020,GO:0016202,GO:0016787,GO:0019222,GO:0019538,GO:0031323,GO:0031967,GO:0031970,GO:…	ko:K01392
Mt0054_10110	Medtr6g060570		150.94	154.83	146.1	37.44	39.7	33.54	150.623	36.8933	-2.0295	9.65325e-76	7.72659e-74	G	phosphopyruvate hydratase activity	-	GO:0000015,GO:0000287,GO:0003674,GO:0003824,GO:0004634,GO:0005488,GO:0005575,GO:0005622,GO:0005623,GO:0005737,GO:0005829,GO:0005975,GO:0006082,GO:0006090,GO:0006091,GO:0006096,GO:0006139,GO:0006163,GO:0006164,GO:0006165,GO:0006725,GO:0006732,GO:0006733,GO:0006753,GO:0006754,GO:0006757,GO:0006793,GO:0006796,GO:0006807,GO:0008150,GO:0008152,GO:0009056,GO:0009058,GO:0009108,GO:0009117,GO:0009123,GO:…	ko:K01689
Mt0008_00897	Medtr5g072420	NCR	17.31	20	25.31	0.34	0.43	0.38	20.8733	0.383333	-5.7669	9.80223e-76	7.82788e-74	#N/A	#N/A	#N/A	#N/A	#N/A
Mt0013_10764	Medtr3g053590	NCR	17.51	18.1	23.68	1.05	0.95	0.75	19.7633	0.916667	-4.4303	1.41361e-75	1.12374e-73	#N/A	#N/A	#N/A	#N/A	#N/A
Mt0035_00170	Medtr7g024300		10.27	9.54	10.99	53.46	46.89	45.63	10.2667	48.66	2.2448	2.53054e-75	2.00251e-73	I	Enoyl-CoA hydratase/isomerase	-	GO:0003674,GO:0003824,GO:0004165,GO:0004300,GO:0005575,GO:0005622,GO:0005623,GO:0005737,GO:0005739,GO:0005759,GO:0005777,GO:0006082,GO:0006629,GO:0006631,GO:0006635,GO:0008150,GO:0008152,GO:0009056,GO:0009062,GO:0009987,GO:0016042,GO:0016054,GO:0016829,GO:0016835,GO:0016836,GO:0016853,GO:0016860,GO:0016863,GO:0019395,GO:0019752,GO:0030258,GO:0031974,GO:0032787,GO:0034440,GO:0042579,GO:0043226,GO:…	-
Mt0011_10553	Medtr7g083180		1.49	1.39	2.15	29.75	38.6	39.5	1.67667	35.95	4.4223	2.94316e-75	2.32376e-73	I	acyltransferase-like protein	-	GO:0003674,GO:0003824,GO:0004144,GO:0005575,GO:0005622,GO:0005623,GO:0005737,GO:0006066,GO:0006629,GO:0006638,GO:0006639,GO:0006641,GO:0006720,GO:0006721,GO:0008150,GO:0008152,GO:0008374,GO:0008610,GO:0009058,GO:0009507,GO:0009532,GO:0009536,GO:0009570,GO:0009987,GO:0010287,GO:0016101,GO:0016411,GO:0016740,GO:0016746,GO:0016747,GO:0017144,GO:0019432,GO:0033306,GO:0034308,GO:0043226,GO:0043227,GO:…	-
Mt0002_11501	Medtr1g042850	NCR	223.04	264.91	304.07	7.62	11.74	13.89	264.007	11.0833	-4.5741	5.20135e-75	4.09744e-73	#N/A	#N/A	#N/A	#N/A	#N/A
Mt0050_10137	Medtr1g053625	NCR	28.28	18.79	26.49	2.16	2	2.08	24.52	2.08	-3.5593	7.40713e-75	5.82193e-73	#N/A	#N/A	#N/A	#N/A	#N/A
Mt0039_00097	Medtr1g089865		256.91	250.58	234.76	62.02	66.41	54.23	247.417	60.8867	-2.0227	7.75054e-75	6.07817e-73	L	oxidoreductase, 2OG-Fe(II) oxygenase family protein	-	-	-
Mt0038_00175	Medtr8g095350		17.23	20.73	23.2	1.25	1.26	1.19	20.3867	1.23333	-4.047	1.18027e-74	9.23521e-73	#N/A	#N/A	#N/A	#N/A	#N/A
Mt0018_00366	Medtr2g033170		1.38	1.83	1.63	24.76	19.27	23.76	1.61333	22.5967	3.808	2.16733e-74	1.69207e-72	K	Transcription factor	MYB108	GO:0000981,GO:0000988,GO:0000989,GO:0001067,GO:0001076,GO:0001101,GO:0001134,GO:0001135,GO:0003674,GO:0003676,GO:0003677,GO:0003700,GO:0005488,GO:0005575,GO:0005622,GO:0005623,GO:0005634,GO:0006139,GO:0006351,GO:0006355,GO:0006357,GO:0006725,GO:0006807,GO:0006950,GO:0006952,GO:0006970,GO:0008150,GO:0008152,GO:0009058,GO:0009059,GO:0009605,GO:0009607,GO:0009620,GO:0009628,GO:0009651,GO:0009719,GO:…	ko:K09422
Mt0091_00076	Medtr3g436500		49.96	59.12	73.88	2.16	2.15	3.41	60.9867	2.57333	-4.5668	2.23913e-74	1.74422e-72	#N/A	#N/A	#N/A	#N/A	#N/A
Mt0006_00850	Medtr3g071330	NCR	56.96	66.98	67.54	8.33	8.91	9.46	63.8267	8.9	-2.8423	2.65798e-74	2.06589e-72	#N/A	#N/A	#N/A	#N/A	#N/A
Mt0185_00007	Medtr4g046850	NCR	41.5	51.77	73.88	1.25	1.29	1.94	55.7167	1.49333	-5.2215	3.64652e-74	2.82792e-72	#N/A	#N/A	#N/A	#N/A	#N/A
Mt0085_00117	Medtr7g029275	CP450	1.57	2.19	2.22	30.66	34.36	40.45	1.99333	35.1567	4.1405	3.86879e-74	2.99364e-72	IQ	Cytochrome p450	-	GO:0003674,GO:0003824,GO:0004497,GO:0005488,GO:0005506,GO:0005575,GO:0005622,GO:0005623,GO:0005737,GO:0005783,GO:0005789,GO:0008150,GO:0008152,GO:0012505,GO:0016020,GO:0016021,GO:0016491,GO:0016705,GO:0020037,GO:0031224,GO:0031984,GO:0042175,GO:0043167,GO:0043169,GO:0043226,GO:0043227,GO:0043229,GO:0043231,GO:0044422,GO:0044424,GO:0044425,GO:0044432,GO:0044444,GO:0044446,GO:0044464,GO:0046872,GO:…	ko:K20665
Mt0024_00067	Medtr6g083900		263.33	244.73	262.77	86.98	88.53	79.23	256.943	84.9133	-1.5974	4.77375e-74	3.68572e-72	O	ubiquitin protein ligase activity	-	GO:0003674,GO:0003824,GO:0004842,GO:0005488,GO:0005575,GO:0005622,GO:0005623,GO:0005634,GO:0006464,GO:0006508,GO:0006511,GO:0006807,GO:0008150,GO:0008152,GO:0008270,GO:0009056,GO:0009057,GO:0009987,GO:0010498,GO:0016567,GO:0016740,GO:0019538,GO:0019787,GO:0019941,GO:0030163,GO:0032446,GO:0036211,GO:0043161,GO:0043167,GO:0043169,GO:0043170,GO:0043226,GO:0043227,GO:0043229,GO:0043231,GO:0043412,GO:…	ko:K16276
Mt0030_10061	Medtr3g435430		50.55	50.63	69.34	5.26	4.55	3.47	56.84	4.42667	-3.6826	4.83786e-74	3.72697e-72	S	Pollen allergen	-	GO:0005575,GO:0005576,GO:0005618,GO:0005623,GO:0008150,GO:0009664,GO:0009987,GO:0016020,GO:0016043,GO:0030312,GO:0044464,GO:0045229,GO:0071554,GO:0071555,GO:0071669,GO:0071840,GO:0071944	ko:K20628
Mt0013_10133	Medtr3g467420		1.22	0.69	1.28	47.12	90.77	95.14	1.06333	77.6767	6.1908	5.57227e-74	4.27387e-72	O	Glutathione S-transferase	-	GO:0003674,GO:0003824,GO:0004364,GO:0007154,GO:0007165,GO:0008150,GO:0009719,GO:0009725,GO:0009733,GO:0009734,GO:0009755,GO:0009987,GO:0010033,GO:0016740,GO:0016765,GO:0023052,GO:0032870,GO:0042221,GO:0050789,GO:0050794,GO:0050896,GO:0051716,GO:0065007,GO:0070887,GO:0071310,GO:0071365,GO:0071495	ko:K00799
Mt0021_00098	Medtr7g406840		122.81	129.75	150.33	27.32	24.06	23.47	134.297	24.95	-2.4283	6.20499e-74	4.74872e-72	S	Heparan-alpha-glucosaminide N-acetyltransferase-like	-	-	ko:K10532
Mt0009_10690	Medtr8g099245		169.15	161.66	163.75	45.19	49.6	46.73	164.853	47.1733	-1.8051	8.76151e-74	6.69057e-72	S	Arabinogalactan peptide	-	-	-
Mt0018_10545	Medtr4g052650	NCR	19.35	16.89	22.92	1.45	1.69	1.5	19.72	1.54667	-3.6724	1.08332e-73	8.25451e-72	#N/A	#N/A	#N/A	#N/A	#N/A
Mt0018_00457	Medtr2g035320		16.68	14.37	22.81	226.17	187.48	182.58	17.9533	198.743	3.4686	1.69853e-73	1.2914e-71	S	Major allergen Pru	-	GO:0006950,GO:0006952,GO:0008150,GO:0009607,GO:0050896	-
Mt0078_10111	Medtr4g007090		29.19	23	30.03	4.18	4.12	3.82	27.4067	4.04	-2.7621	3.73097e-73	2.83051e-71	I	Catalyzes the second two steps of the methylation pathway of phosphatidylcholine biosynthesis, the SAM-dependent methylation of phosphatidylmonomethylethanolamine (PMME) to phosphatidyldimethylethanolamine (PDME) and of PDME to phosphatidylcholine (PC)	-	-	ko:K00550
Mt0046_10025	Medtr8g031120		22.46	30.82	26.32	1.79	1.38	1.82	26.5333	1.66333	-3.9957	4.27674e-73	3.23752e-71	S	Ripening-related protein	-	-	-
Mt0066_10077	Medtr8g033010	NCR	99.37	96.63	123.98	6.51	6.18	9.55	106.66	7.41333	-3.8468	4.50686e-73	3.40434e-71	#N/A	#N/A	#N/A	#N/A	#N/A
Mt0101_10003	Medtr2g438760		1.22	1.13	0.94	16.26	14.01	15.22	1.09667	15.1633	3.7894	7.39924e-73	5.57708e-71	#N/A	#N/A	#N/A	#N/A	#N/A
Mt0054_00157	Medtr6g461990	NCR	32.89	33.23	47.08	1.08	1.6	1.88	37.7333	1.52	-4.6337	8.80699e-73	6.62384e-71	#N/A	#N/A	#N/A	#N/A	#N/A
Mt0045_10023	Medtr4g017640		10.9	8.81	10.33	46.14	44.93	46.99	10.0133	46.02	2.2003	1.58309e-72	1.1881e-70	S	Receptor-like protein 12	-	GO:0005575,GO:0005623,GO:0005886,GO:0008150,GO:0009888,GO:0010073,GO:0016020,GO:0016021,GO:0031224,GO:0032501,GO:0032502,GO:0044425,GO:0044464,GO:0048507,GO:0048856,GO:0071944	-
Mt0007_10872	Medtr3g106000		19.63	17.84	19.62	3.07	2.3	2.08	19.03	2.48333	-2.9379	1.714e-72	1.28359e-70	E	Chorismate mutase	CM2	GO:0003674,GO:0003824,GO:0004106,GO:0005575,GO:0005622,GO:0005623,GO:0005737,GO:0005829,GO:0006082,GO:0006520,GO:0006725,GO:0006807,GO:0008150,GO:0008152,GO:0008652,GO:0009058,GO:0009072,GO:0009073,GO:0009987,GO:0016053,GO:0016853,GO:0016866,GO:0019438,GO:0019752,GO:0043436,GO:0043648,GO:0044237,GO:0044238,GO:0044249,GO:0044281,GO:0044283,GO:0044424,GO:0044444,GO:0044464,GO:0046394,GO:0046417,GO:…	ko:K01850
Mt0026_00058	Medtr7g068110		3.42	3.11	4.06	41.11	42.28	55.04	3.53	46.1433	3.7084	2.34935e-72	1.75562e-70	#N/A	#N/A	#N/A	#N/A	#N/A
Mt0005_00766	Medtr5g020760		120.29	104.3	111.99	394.36	427.51	417.02	112.193	412.963	1.88	2.59233e-72	1.93306e-70	DL	Replication factor C subunit	-	-	ko:K10756
Mt0017_10613	Medtr3g020340	PDF1.5 defensin-like	111.84	129.71	154.22	7.62	9.71	11.2	131.923	9.51	-3.7941	3.56121e-72	2.64987e-70	T	Belongs to the DEFL family	-	-	-
Mt0010_10952	Medtr5g098020		56.8	61.27	51.11	1.96	3.5	1.68	56.3933	2.38	-4.5665	4.89738e-72	3.63635e-70	#N/A	#N/A	#N/A	#N/A	#N/A
Mt0044_00047	Medtr7g034060	NCR202-TC41898	12.55	11.22	12.45	0.4	0.37	0.32	12.0733	0.363333	-5.0544	4.92961e-72	3.65252e-70	#N/A	#N/A	#N/A	#N/A	#N/A
Mt0008_10189	Medtr5g056185	NCR	544.12	578.33	658.55	30.66	43.21	50.12	593.667	41.33	-3.8444	5.01443e-72	3.70749e-70	#N/A	#N/A	#N/A	#N/A	#N/A
Mt0035_10295	Medtr7g027180	NCR158-TC35875 MtN31	2349.83	3183.64	3588.48	121.45	159.12	188.83	3040.65	156.467	-4.2805	5.37823e-72	3.96806e-70	#N/A	#N/A	#N/A	#N/A	#N/A
Mt0055_00154	Medtr2g036460		6.69	6.32	6.59	39.8	46.12	46.7	6.53333	44.2067	2.7584	5.74131e-72	4.22701e-70	T	Belongs to the protein kinase superfamily	-	GO:0000003,GO:0000166,GO:0003674,GO:0003824,GO:0004672,GO:0004674,GO:0005488,GO:0005515,GO:0005516,GO:0005524,GO:0005575,GO:0005623,GO:0005886,GO:0006464,GO:0006468,GO:0006793,GO:0006796,GO:0006807,GO:0007154,GO:0008037,GO:0008144,GO:0008150,GO:0008152,GO:0009856,GO:0009875,GO:0009987,GO:0016020,GO:0016021,GO:0016301,GO:0016310,GO:0016740,GO:0016772,GO:0016773,GO:0017076,GO:0019538,GO:0022414,GO:…	ko:K04733
Mt0021_00196	Medtr7g008090	NCR	41.78	38.06	51.14	2.93	3.01	4.2	43.66	3.38	-3.6912	5.92042e-72	4.3497e-70	#N/A	#N/A	#N/A	#N/A	#N/A
Mt0008_10343	Medtr5g061120		29.82	19.52	30.2	1.38	1.51	1.79	26.5133	1.56	-4.0871	5.99248e-72	4.39339e-70	#N/A	#N/A	#N/A	#N/A	#N/A
Mt0023_00010	Medtr2g016230		176.78	193.8	172.11	44.89	45.08	44.27	180.897	44.7467	-2.0153	1.26072e-71	9.20428e-70	#N/A	#N/A	#N/A	#N/A	#N/A
Mt0024_10406	Medtr6g091760		5.39	5.67	4.2	47.28	61.03	56.05	5.08667	54.7867	3.429	1.45198e-71	1.05785e-69	E	1-aminocyclopropane-1-carboxylate synthase	ACS7	GO:0000003,GO:0003006,GO:0003674,GO:0003824,GO:0005488,GO:0005515,GO:0006082,GO:0006520,GO:0006807,GO:0007275,GO:0007568,GO:0008144,GO:0008150,GO:0008152,GO:0008652,GO:0009058,GO:0009692,GO:0009693,GO:0009835,GO:0009987,GO:0010154,GO:0010817,GO:0016053,GO:0016829,GO:0016846,GO:0016847,GO:0018871,GO:0019752,GO:0019842,GO:0021700,GO:0022414,GO:0030170,GO:0032501,GO:0032502,GO:0032787,GO:0036094,GO:…	ko:K01762
Mt0003_01642	Medtr4g088350		139.77	135.85	141.67	42.83	35.77	40.34	139.097	39.6467	-1.8108	1.81696e-71	1.321e-69	EG	Triose phosphate phosphate translocator	-	GO:0003674,GO:0005215,GO:0005342,GO:0005575,GO:0005622,GO:0005623,GO:0005737,GO:0006810,GO:0006811,GO:0006820,GO:0008028,GO:0008150,GO:0008509,GO:0008514,GO:0008643,GO:0009314,GO:0009416,GO:0009507,GO:0009526,GO:0009536,GO:0009628,GO:0009642,GO:0009643,GO:0009941,GO:0015075,GO:0015120,GO:0015144,GO:0015318,GO:0015605,GO:0015711,GO:0015713,GO:0015717,GO:0015718,GO:0015748,GO:0015849,GO:0016020,GO:…	ko:K15283
[truncated: 6,158 more rows]
