# Supplementary material for: Dual RNA-Seq Analysis Pinpoints to a BalancedRegulation between Symbiosis and Immunity in the Medicago truncatula-Sinorhizobium meliloti Symbiotic Interactions
Source: Preprints.org preprint supplement (doi:10.20944/preprints202309.0662.v1), 2023-09-11
Supplement: Supplementary file 2 [file FigS1.docx]

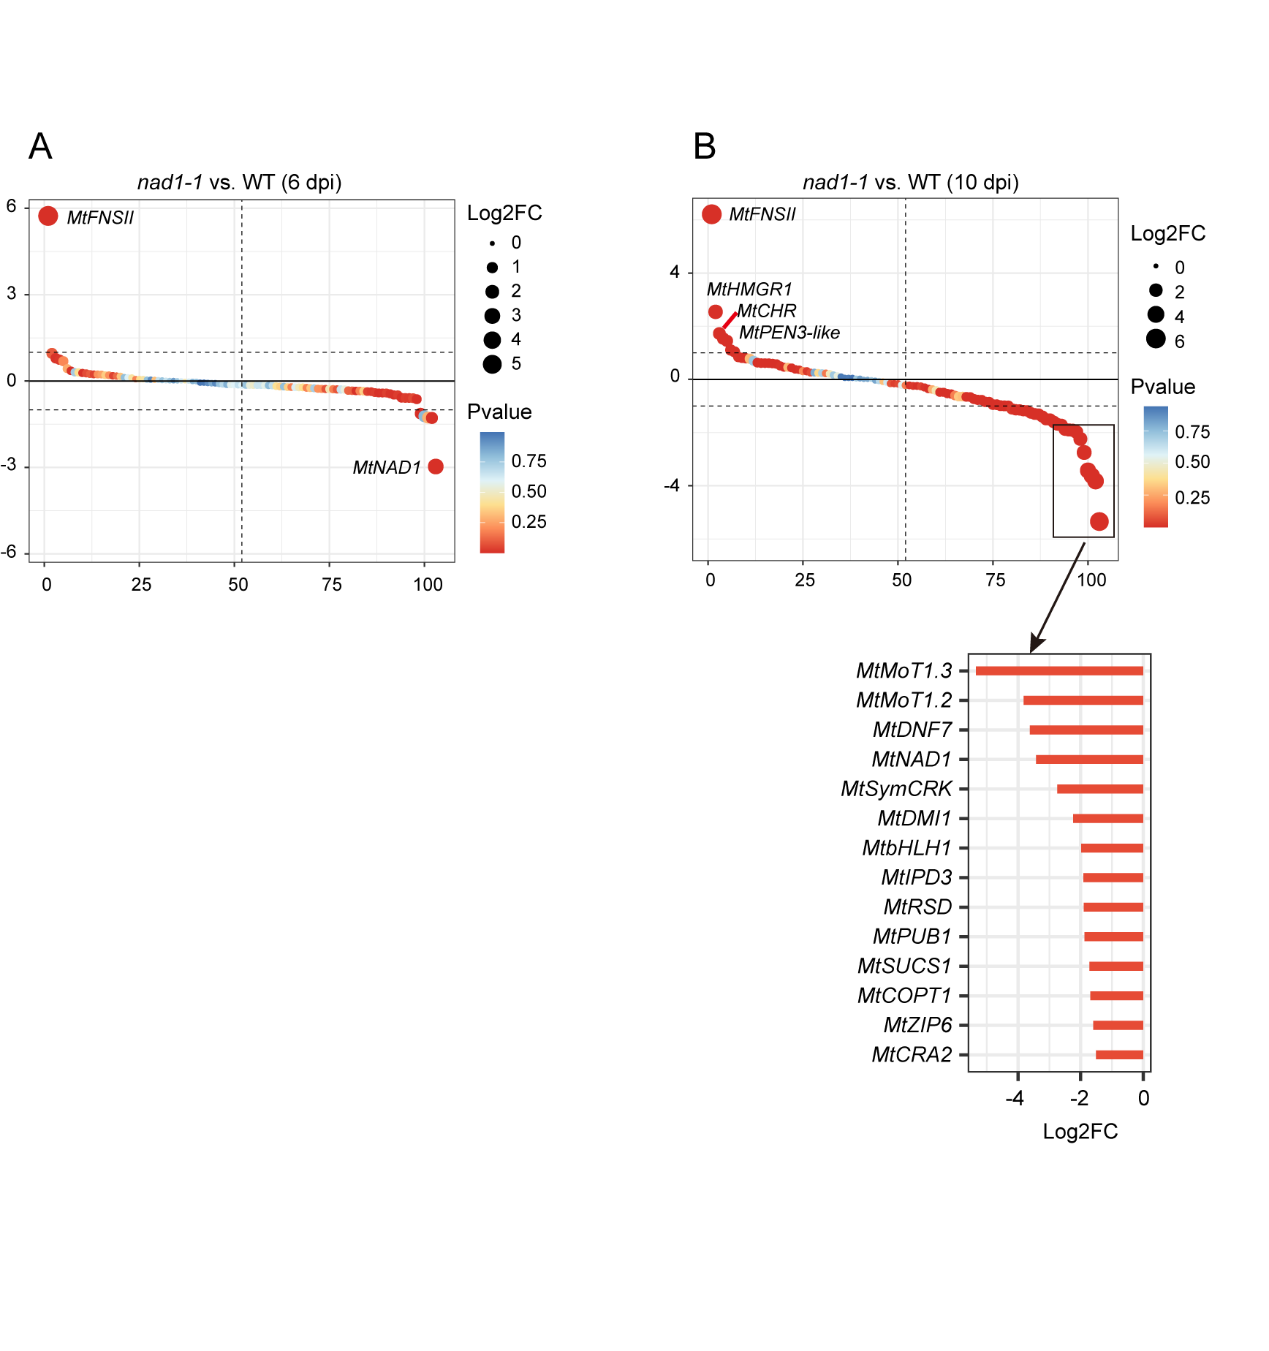


Fig S1. Identification of plant transcriptional responses in symbiotic nitrogen fixation processes. A and B, Gene ranking dotplots showing relative expression levels of genes involved in symbiotic nitrogen fixation between *nad1-1* and WT at 6 dpi (B) and 10 dpi (C) in *Medicago truncatula*.
