# Supplementary material for: Dual RNA-Seq Analysis Pinpoints to a BalancedRegulation between Symbiosis and Immunity in the Medicago truncatula-Sinorhizobium meliloti Symbiotic Interactions
Source: Preprints.org preprint supplement (doi:10.20944/preprints202309.0662.v1), 2023-09-11
Supplement: Supplementary file 4 [file Table S10.xlsx]

## Sheet: 6 dpi
Table S10:Expression of rhizobia genes involved in defence.
Gene ID	Gene Name	Description	WT-6dpi_CPM	WT-6dpi_CPM	WT-6dpi_CPM	nad1-1-6dpi_CPM	nad1-1-6dpi_CPM	nad1-1-6dpi_CPM	Log2FC-1	Log2FC-2	Log2FC-3	Log2FC-mean	Pvalue-mean	FDR
SMc01345	accC	accC; acetyl-CoA carboxylase, biotin carboxylase subunit [EC:6.4.1.2 6.3.4.14]	1352.06	1294.32	1444.33	1197.4	1185.65	1192.3	-0.175254	-0.126516	-0.276653	-0.1943	9.21319e-07	7.17428e-06
SMc02764	accD	accD; acetyl-CoA carboxylase carboxyl transferase subunit beta [EC:6.4.1.2 2.1.3.15]	360.95	344.31	397.38	374.12	412.6	390.78	0.0517021	0.261036	-0.0241626	0.0948	0.0379853	0.099302
SMb21184	ackA	ackA; acetate kinase [EC:2.7.2.1]	19.41	13.52	22.12	76.69	65.83	80	1.98224	2.28365	1.85465	2.0151	7.82457e-18	2.62821e-16
SMc03846	acnA	ACO, acnA; aconitate hydratase [EC:4.2.1.3]	2889.19	2913.34	2824.2	2054.77	2102.18	2189.6	-0.491688	-0.470788	-0.367175	-0.4428	1.64651e-12	2.75038e-11
SMc01640	ACSS1_2	ACSS1_2, acs; acetyl-CoA synthetase [EC:6.2.1.1]	14.31	15.55	16.83	17.32	18.08	18.78	0.275415	0.21748	0.158162	0.2146	0.656025	0.802152
SMa2363	amiE	E3.5.1.4, amiE; amidase [EC:3.5.1.4]	17.25	18.25	24.77	29.41	35.47	26.8	0.76971	0.958703	0.113639	0.6052	0.174302	0.332928
SMc04386	aspB	aspB; aspartate aminotransferase [EC:2.6.1.1]	137.83	181.39	194.53	379.07	299.25	385.89	1.45957	0.722256	0.988197	1.0506	2.5903e-06	1.8433e-05
SMc03879	atoB	ACAT, atoB; acetyl-CoA C-acetyltransferase [EC:2.3.1.9]	251.35	245.61	309.66	453.01	567.91	422.86	0.849845	1.20929	0.449495	0.8399	3.47884e-05	0.000200162
SMb20999	bacA	bacA	1577.14	1734.17	1754.18	2653.75	2384.05	2172.39	0.750722	0.459169	0.308486	0.5093	0.0937747	0.205434
SMc00115	catE	catE; catechol 2,3-dioxygenase [EC:1.13.11.2]	26.47	25.01	24.58	87.41	58.41	64.74	1.72344	1.22371	1.39717	1.469	2.68549e-09	2.95881e-08
SMa0612	ccoN	ccoN; cytochrome c oxidase cbb3-type subunit I [EC:7.1.1.9]	65.68	67.83	81.1	213.59	202.36	191.09	1.70132	1.57693	1.23648	1.5001	2.83952e-19	1.10974e-17
SMa0765	ccoN	ccoN; cytochrome c oxidase cbb3-type subunit I [EC:7.1.1.9]	3260.54	2854.3	2730.81	1353.54	1194.69	1293.81	-1.26837	-1.2565	-1.0777	-1.2031	8.21251e-33	1.04148e-30
SMa0615	ccoO	ccoO; cytochrome c oxidase cbb3-type subunit II	10.39	7.44	15.5	36.83	39.17	38.14	1.82569	2.39637	1.29904	1.7759	4.67018e-10	5.70148e-09
SMa0766	ccoO	ccoO; cytochrome c oxidase cbb3-type subunit II	896.8	797.01	779.64	359.28	301.34	405.26	-1.31968	-1.40321	-0.94396	-1.2145	4.72768e-25	3.41603e-23
SMa0617	ccoP	ccoP; cytochrome c oxidase cbb3-type subunit III	14.9	13.07	17.39	32.99	35.7	35.99	1.14672	1.44966	1.04934	1.2065	1.45961e-05	9.09728e-05
SMa0769	ccoP	ccoP; cytochrome c oxidase cbb3-type subunit III	709.95	613.58	607.98	296.88	328.23	294.95	-1.25784	-0.902544	-1.04355	-1.0699	3.24209e-32	4.02926e-30
SMa1552	cheR	cheR; chemotaxis protein methyltransferase CheR [EC:2.1.1.80]	5.69	5.63	6.24	10.45	10.2	9	0.877002	0.857362	0.528379	0.7557	0.174894	0.333269
SMc00653	cheY	cheY; two-component system, chemotaxis family, chemotaxis protein CheY	26.27	31.32	24.95	33.54	41.26	25.82	0.352466	0.39766	0.0494492	0.2858	0.811273	0.901996
SMc02175	crp	crp; CRP/FNR family transcriptional regulator, cyclic AMP receptor protein	93.33	82.92	84.32	91.81	114.04	99.75	-0.0236896	0.459748	0.242442	0.23	0.493767	0.678971
SMc01983	ctaD	coxA, ctaD; cytochrome c oxidase subunit I [EC:7.1.1.9]	31.17	42.59	54.82	78.34	72.32	77.65	1.32959	0.76388	0.502284	0.8283	0.00473393	0.0165821
SMc00013	ctaE	coxC, ctaE; cytochrome c oxidase subunit III [EC:7.1.1.9]	659.75	641.3	637.47	595.68	649.73	616.1	-0.147382	0.0188409	-0.0491929	-0.0585	0.000292331	0.0013516
SMb21578	ctpA	copA, ctpA, ATP7; P-type Cu+ transporter [EC:7.2.2.8]	83.72	72.78	91.12	263.89	248.72	237.83	1.65629	1.77291	1.38409	1.5996	6.57975e-23	4.21511e-21
SMc02897	CYC	CYC; cytochrome c	1171.68	1159.79	1168.7	905.47	1058.16	988.89	-0.37184	-0.132306	-0.241023	-0.2455	5.27367e-08	4.95024e-07
SMb20172	CYC	CYC; cytochrome c	7.06	7.66	40.46	14.02	55.17	10.76	0.989746	2.84847	-1.91082	0.535	0.847973	0.921852
SMc02255	cydA	cydA; cytochrome bd ubiquinol oxidase subunit I [EC:7.1.1.7]	87.05	84.27	129.88	85.49	114.97	101.51	-0.0260886	0.448166	-0.355557	0.0037	0.0580273	0.140852
SMc02857	dnaK	dnaK, HSPA9; molecular chaperone DnaK	3904.41	4102.65	4565.15	5364.95	4476.26	5442.41	0.45846	0.125738	0.253583	0.2817	0.815461	0.903741
SMb20942	exoB	exoB	46.27	42.36	48.4	65.42	82.52	57.7	0.499655	0.962041	0.253564	0.5856	0.105962	0.227365
SMb20945	exoF1	exoF1	62.54	65.57	73.54	100.88	105	82.15	0.689789	0.679282	0.159731	0.5144	0.181911	0.343585
SMb20951	exoI	exoI	46.27	55.66	60.87	124.25	82.75	84.1	1.4251	0.572118	0.466374	0.8384	0.0041429	0.0146606
SMb20961	exoP	exoP, vpsO; polysaccharide biosynthesis transport protein	100.19	106.81	116.26	177.3	181.27	144.54	0.823454	0.763093	0.314114	0.6382	0.0141895	0.04335
SMb20944	exoQ	exoQ	39.6	34.25	36.68	39.31	48.21	44.4	-0.0106041	0.493228	0.275566	0.2552	0.694778	0.83058
SMb20950	exoT	exoT	22.94	20.96	26.66	42.06	44.97	31.69	0.874583	1.10132	0.249351	0.7506	0.0281619	0.0777424
SMb20948	exoU	exoU	23.53	27.49	35.54	53.88	60.27	43.03	1.19525	1.13253	0.275899	0.8606	0.0039586	0.0140805
SMb20949	exoV	exoV	25.1	27.72	32.52	39.86	45.9	36.18	0.667254	0.727567	0.153865	0.5149	0.285856	0.476897
SMb20947	exoX	exoX	72.35	92.16	80.16	122.87	129.34	100.14	0.764068	0.488956	0.321064	0.5262	0.165133	0.320468
SMb20946	exoY	exoY	76.66	98.47	107	153.11	162.95	113.05	0.998023	0.726673	0.0793502	0.605	0.0703197	0.163291
SMb20943	exoZ	exoZ	15.69	14.2	17.2	19.24	22.48	16.62	0.294263	0.662751	-0.0494882	0.3091	0.925417	0.966258
SMb20941	exsA	exsA	113.52	116.27	122.69	90.71	109.41	110.9	-0.323613	-0.0877343	-0.145758	-0.1805	0.000221149	0.00105466
SMb20940	exsB	exsB,queC	24.51	30.19	26.47	17.87	28.05	23.27	-0.455831	-0.10607	-0.185887	-0.2304	0.00830638	0.0273534
SMb20939	exsC	exsC,queD	1.37	2.03	0.95	1.1	1.39	0.78	-0.316672	-0.546395	-0.284453	-0.4117	0.326229	0.520058
SMb20938	exsD	exsD,queE	9.8	10.82	13.61	9.9	9.5	11.34	0.0146468	-0.187701	-0.263246	-0.1551	0.0945883	0.206847
SMb20937	exsE	exsE	66.27	58.36	72.41	96.48	123.32	101.12	0.541874	1.07936	0.481808	0.7037	0.00761552	0.0252928
SMb20934	exsF	exsF	11.96	12.17	10.4	12.37	11.82	9.19	0.0486281	-0.0420991	-0.178447	-0.0489	0.160136	0.312919
SMb20933	exsG	exsG	28.43	28.39	53.88	57.45	50.07	32.86	1.01489	0.818564	-0.713417	0.3427	0.941176	0.973604
SMb20932	exsH	exsH	15.49	14.42	17.77	19.79	24.11	20.34	0.353434	0.74156	0.194876	0.4301	0.627049	0.782897
SMb20935	exsI	exsI	43.53	45.07	47.45	55.53	67.69	42.25	0.351257	0.586775	-0.167457	0.2824	0.762055	0.873048
SMc03054	flhA	flhA; flagellar biosynthesis protein FlhA	12.35	17.35	18.53	17.32	22.48	16.43	0.487928	0.373706	-0.17353	0.2214	0.664754	0.808531
SMc03018	flhB	flhB; flagellar biosynthetic protein FlhB	18.43	31.77	18.9	22.82	16.69	17.99	0.308243	-0.928681	-0.071191	-0.2651	0.0200117	0.0578024
SMc03037	fliC	fliC; flagellin	39.02	45.52	41.97	53.33	68.38	53	0.450734	0.587074	0.336634	0.4657	0.377654	0.571818
SMc03019	fliG	fliG; flagellar motor switch protein FliG	9.61	14.65	14.75	10.72	17.38	11.34	0.157697	0.246527	-0.379294	0.0158	0.258927	0.444467
SMc03891	fliY	fliY, tcyA; L-cystine transport system substrate-binding protein	172.93	172.38	185.65	232.55	239.68	202.04	0.427353	0.475517	0.122056	0.3447	0.858953	0.929263
SMc03854	ftsY	ftsY; fused signal recognition particle receptor	349.39	338.23	374.13	331.51	351.17	382.96	-0.0757859	0.054165	0.0336541	0.0053	0.00932124	0.030215
SMb21009	glpK	glpK, GK; glycerol kinase [EC:2.7.1.30]	62.94	61.97	83.18	104.46	154.38	99.55	0.730902	1.31684	0.259185	0.7843	0.00565621	0.0193972
SMc02087	gltA	CS, gltA; citrate synthase [EC:2.3.3.1]	22600.5	23040.8	21790	15590.2	12253.1	16161.4	-0.535716	-0.911045	-0.431112	-0.6158	3.82463e-11	5.32876e-10
SMb21566	groEL	groEL, HSPD1; chaperonin GroEL	207.44	194.69	204.74	216.34	158.09	187.37	0.0606063	-0.300433	-0.127903	-0.1113	0.0036025	0.0129548
SMc00538	grx2	grx2	1043.45	1028.87	1057.92	1401.37	1159.22	1207.95	0.425476	0.172094	0.19133	0.2677	0.677751	0.817458
SMc02443	grxC	grxC	228.02	228.26	220.43	614.65	535.22	602.8	1.4306	1.22945	1.45136	1.3729	5.37351e-17	1.62092e-15
SMc00825	gshA	gsh1,gshA	285.27	295.86	286.98	297.15	316.64	316.07	0.0588633	0.0979289	0.139294	0.0991	0.0500977	0.125123
SMc00419	gshB1	gshB1	257.04	270.63	283.38	224.31	219.51	237.83	-0.196499	-0.302035	-0.252807	-0.2508	2.08732e-06	1.51526e-05
SMb21586	gshB2	gshB2	3.33	4.06	3.59	3.57	4.64	3.72	0.100402	0.192645	0.0513188	0.1197	0.645565	0.795618
SMc00914	hcaD	hcaD; 3-phenylpropionate/trans-cinnamate dioxygenase ferredoxin reductase component [EC:1.18.1.3]	366.05	326.06	388.12	356.53	357.67	385.31	-0.0380172	0.133492	-0.0104831	0.0255	0.0157774	0.0473856
SMb20820	hcaD	hcaD; 3-phenylpropionate/trans-cinnamate dioxygenase ferredoxin reductase component [EC:1.18.1.3]	42.74	43.04	44.24	20.62	39.17	27.38	-1.05154	-0.135929	-0.692229	-0.5768	4.36892e-06	2.98335e-05
SMa0387	hisC	hisC; histidinol-phosphate aminotransferase [EC:2.6.1.9]	46.27	52.28	44.05	76.69	78.81	55.16	0.728961	0.59212	0.32448	0.5629	0.162869	0.317089
SMa1191	hmp	hmp	146.46	95.77	118.72	86.59	122.85	91.34	-0.758234	0.359252	-0.378244	-0.2631	0.000415661	0.00186223
SMb21183	htpG	HSP90A, htpG; molecular chaperone HtpG	532.31	484.92	597.02	668.8	763.78	721.91	0.329308	0.65541	0.27404	0.4165	0.390041	0.583465
SMc00819	katA	katC	5397.04	4850.53	5915.34	5024.64	5280.83	5624.7	-0.103148	0.122622	-0.0726849	-0.0209	0.00340621	0.0123262
SMa2379	katB	katG; catalase-peroxidase [EC:1.11.1.21]	116.46	115.82	146.51	160.53	195.64	161.95	0.463008	0.756317	0.144549	0.4519	0.320199	0.512814
SMb20007	katC	lsrA	10.59	13.52	10.4	23.37	13.91	12.91	1.14196	0.0410273	0.311905	0.5404	0.450334	0.640507
SMc00037	lsrA	katE, CAT, catB, srpA; catalase [EC:1.11.1.6]	30.78	31.32	38.75	34.91	41.72	36.97	0.181647	0.413655	-0.0678413	0.1718	0.393706	0.587816
SMc01225	lsrB	lsrB	889.74	878.13	996.48	603.92	634.9	611.6	-0.559026	-0.467905	-0.704252	-0.5791	3.79498e-18	1.33232e-16
SMc04255	manB	E3.2.1.25, MANBA, manB; beta-mannosidase [EC:3.2.1.25]	19.8	15.32	20.42	25.29	29.21	19.75	0.353067	0.931046	-0.0481302	0.4189	0.701429	0.833804
SMc03992	motB	motB; chemotaxis protein MotB	123.52	99.82	120.05	162.73	171.3	161.56	0.397736	0.779124	0.428435	0.5293	0.112061	0.237581
SMb20757	MUT	MUT; methylmalonyl-CoA mutase [EC:5.4.99.2]	44.7	39.43	47.07	90.44	89.94	79.21	1.01669	1.18967	0.750875	0.9845	8.41202e-06	5.49079e-05
SMa1245	nnrR	nnrR	42.94	37.41	37.81	34.36	48.21	42.83	-0.321592	0.365908	0.179854	0.0858	0.181132	0.342739
SMa1194	nnrS	nnrS	37.84	31.55	34.22	14.84	21.33	14.67	-1.35042	-0.564756	-1.22197	-1.0271	3.77228e-11	5.26763e-10
SMa1283	nnrU	nnrU	148.81	110.64	109.65	83.29	81.82	102.49	-0.837256	-0.435348	-0.0974227	-0.4639	5.30275e-06	3.57389e-05
SMa1273	norB	norB	29.61	22.98	21.36	15.39	20.17	24.45	-0.944091	-0.188168	0.194923	-0.3013	0.00890504	0.0290325
SMa1276	norC	norC	5.88	4.06	2.08	3.3	3.25	3.32	-0.83335	-0.32104	0.6746	-0.2843	0.204771	0.376799
SMa1269	norD	norD	30.39	20.28	14.56	16.22	18.08	19.56	-0.905823	-0.165663	0.425896	-0.2763	0.0234936	0.0664495
SMa1279	norE	norE	17.45	15.1	9.45	12.09	11.13	13.3	-0.529413	-0.440095	0.49304	-0.2017	0.0674238	0.158341
SMa1272	norQ	norQ	11.76	8.56	6.43	5.77	10.66	8.61	-1.02724	0.316525	0.421195	-0.0953	0.209334	0.382138
SMc03185	NQO1	NQO1; NAD(P)H dehydrogenase (quinone) [EC:1.6.5.2]	16.08	16.9	18.53	25.56	25.27	24.06	0.66862	0.580402	0.376774	0.5399	0.2919	0.483182
SMa1533	nuoA	nuoA; NADH-quinone oxidoreductase subunit A [EC:7.1.1.2]	10.78	11.94	11.53	52.5	35.47	34.81	2.28396	1.5708	1.59411	1.8419	4.5246e-11	6.24797e-10
SMa1532	nuoB	nuoB; NADH-quinone oxidoreductase subunit B [EC:7.1.1.2]	5.29	3.83	5.1	24.74	15.99	24.84	2.22551	2.06175	2.2841	2.2051	8.55007e-10	1.00625e-08
SMa1531	nuoC	nuoC; NADH-quinone oxidoreductase subunit C [EC:7.1.1.2]	4.9	2.7	4.35	20.34	16.23	21.12	2.05347	2.58763	2.27952	2.2713	8.25266e-10	9.73094e-09
SMa1529	nuoD	nuoD; NADH-quinone oxidoreductase subunit D [EC:7.1.1.2]	8.43	6.99	9.26	45.08	34.31	36.38	2.41888	2.29526	1.97406	2.2298	6.26161e-16	1.61451e-14
SMa1526	nuoE	nuoE; NADH-quinone oxidoreductase subunit E [EC:7.1.1.2]	1.57	1.13	1.32	8.52	5.79	3.52	2.44009	2.35724	1.41504	2.149	0.000738178	0.00310775
SMa1519	nuoI	nuoI; NADH-quinone oxidoreductase subunit I [EC:7.1.1.2]	4.31	4.06	2.84	13.74	9.04	9.78	1.67262	1.15484	1.78394	1.5383	0.000806158	0.00336432
SMa1545	nuoJ	nuoJ; NADH-quinone oxidoreductase subunit J [EC:7.1.1.2]	10.98	11.49	10.21	62.95	44.27	46.55	2.51933	1.94595	2.1888	2.2343	4.61103e-18	1.60972e-16
SMa1536	nuoM	nuoM; NADH-quinone oxidoreductase subunit M [EC:7.1.1.2]	2.94	2.03	3.4	10.45	10.89	11.74	1.82961	2.42345	1.78783	1.9827	8.66228e-06	5.64229e-05
SMc00818	oxyR	oxyR	147.64	159.31	182.24	709.48	457.11	527.69	2.26468	1.5207	1.53385	1.7922	1.10309e-19	4.60041e-18
SMb21640	paaA	paaA; ring-1,2-phenylacetyl-CoA epoxidase subunit PaaA [EC:1.14.13.149]	49.6	65.35	53.88	426.62	200.51	309.61	3.10454	1.61742	2.52263	2.4721	3.43081e-09	3.73363e-08
SMc02562	pckA	E4.1.1.49, pckA; phosphoenolpyruvate carboxykinase (ATP) [EC:4.1.1.49]	617.01	587.22	618.38	663.02	910.04	717.61	0.103759	0.632029	0.214706	0.3298	0.988467	0.994871
SMc00187	petA	UQCRFS1, RIP1, petA; ubiquinol-cytochrome c reductase iron-sulfur subunit [EC:7.1.1.8]	2196.11	2473.04	2295.62	983.54	1055.84	1054.02	-1.15889	-1.22789	-1.12298	-1.1709	7.09402e-43	1.42201e-40
SMc00189	petC	CYC1, CYT1, petC; ubiquinol-cytochrome c reductase cytochrome c1 subunit	3173.49	3140.93	2950.29	1546.78	1548.18	1665.82	-1.0368	-1.02062	-0.824624	-0.9605	6.18457e-29	6.40515e-27
SMc01110	phrR	phrR	472.51	521.65	524.04	916.19	820.34	782.55	0.955302	0.65314	0.578506	0.7305	0.000327212	0.00149122
SMc03239	ppa	ppa; inorganic pyrophosphatase [EC:3.6.1.1]	331.15	396.59	369.97	341.96	337.04	328.39	0.0463427	-0.234728	-0.171998	-0.1239	0.000144479	0.000718808
SMc03895	pyc	PC, pyc; pyruvate carboxylase [EC:6.4.1.1]	638.97	633.86	713.66	701.23	702.58	676.73	0.13414	0.148498	-0.0766566	0.0667	0.0153846	0.0463403
SMa0203	rbsB	rbsB; ribose transport system substrate-binding protein	7.06	9.24	8.32	11.55	16.69	7.82	0.710153	0.853019	-0.0894149	0.5506	0.491361	0.67701
SMa2000	rbsB	rbsB; ribose transport system substrate-binding protein	10.39	7.21	13.42	23.64	32.22	21.12	1.18603	2.15989	0.654225	1.3113	0.000117117	0.000595554
SMb20931	rbsB	rbsB; ribose transport system substrate-binding protein	33.53	38.31	49.53	74.22	95.04	62.98	1.14636	1.31081	0.346591	0.9362	0.000488011	0.00214766
SMb20720	rbsB	rbsB; ribose transport system substrate-binding protein	24.7	27.04	23.25	13.47	20.63	16.62	-0.874761	-0.390351	-0.48431	-0.5641	4.84877e-05	0.000269501
SMb21377	rbsB	rbsB; ribose transport system substrate-binding protein	32.15	30.87	35.35	56.63	54.24	64.94	0.816748	0.813152	0.877397	0.8377	0.00229558	0.00861396
SMb20880	rhlE	rhlE; ATP-dependent RNA helicase RhlE [EC:3.6.4.13]	847.98	859.42	657.13	631.41	741.76	823.23	-0.425453	-0.212411	0.325117	-0.1064	0.0041736	0.0147608
SMc01336	rne	rne; ribonuclease E [EC:3.1.26.12]	2427.86	2355.19	2643.47	2709.55	2610.28	2907.99	0.158368	0.148361	0.137589	0.1478	0.141206	0.282503
SMc03863	rplS	RP-L19, MRPL19, rplS; large subunit ribosomal protein L19	1807.31	1914.89	1667.6	1569.05	1579.48	1611.84	-0.203953	-0.277812	-0.0490647	-0.1792	1.32279e-05	8.34498e-05
SMc00704	rpmB	RP-L28, MRPL28, rpmB; large subunit ribosomal protein L28	1140.89	1261.42	1091.19	838.13	997.89	832.81	-0.444914	-0.338096	-0.389843	-0.3885	2.3421e-10	3.00698e-09
SMc00335	rpsA	RP-S1, rpsA; small subunit ribosomal protein S1	6485.79	6653.65	5935.94	5157.69	4826.74	5641.13	-0.330557	-0.463097	-0.0734923	-0.2878	1.5594e-06	1.17031e-05
SMc02101	rpsB	RP-S2, MRPS2, rpsB; small subunit ribosomal protein S2	2510.2	2466.05	2222.08	2218.33	1685.18	2113.91	-0.178328	-0.549299	-0.0719968	-0.2585	6.08862e-05	0.000331302
SMc04458	secA	secA; preprotein translocase subunit SecA [EC:7.4.2.8]	2714.11	2629.64	2896.42	3120.51	2736.85	3281.37	0.201303	0.0576511	0.180027	0.1493	0.185051	0.348139
SMc01289	secY	secY; preprotein translocase subunit SecY	843.47	798.13	764.14	717.73	681.95	737.56	-0.232896	-0.226958	-0.0510766	-0.1707	3.79627e-05	0.000216422
SMa1325	SMa1325	GST, gst; glutathione S-transferase [EC:2.5.1.18]	2.16	2.25	3.02	3.3	3.01	3.72	0.611435	0.419838	0.300754	0.4329	0.811963	0.902244
SMb20005	SMb20005	GST, gst; glutathione S-transferase [EC:2.5.1.18]	2.55	2.7	1.51	1.37	3.25	2.54	-0.896321	0.26748	0.75028	0.0829	0.692427	0.828626
SMc01443	SMc01443	GST, gst; glutathione S-transferase [EC:2.5.1.18]	50	61.74	62.39	47.28	60.04	53.79	-0.0806981	-0.0402815	-0.213977	-0.1121	0.00632326	0.0213664
SMc00043	sodB	sodB	2464.52	2392.82	2417.18	2284.85	2066.02	2222.07	-0.109207	-0.211858	-0.121421	-0.1463	4.10756e-05	0.000232887
SMc02597	sodC	sodC	36.66	30.42	41.97	34.64	31.06	37.55	-0.0817679	0.0300377	-0.160546	-0.0788	0.036916	0.0969553
SMb20019	sucB	DLST, sucB; 2-oxoglutarate dehydrogenase E2 component (dihydrolipoamide succinyltransferase) [EC:2.3.1.61]	6.67	5.41	6.99	95.94	64.21	70.41	3.84637	3.5691	3.33242	3.5958	1.46509e-42	2.84502e-40
SMc02067	tatA	tatA; sec-independent protein translocase protein TatA	131.36	146.69	171.85	160.26	165.27	150.99	0.286888	0.172054	-0.186697	0.0829	0.0625989	0.149267
SMc02066	tatB	tatB; sec-independent protein translocase protein TatB	142.73	158.18	149.92	215.79	203.06	213.58	0.596339	0.360339	0.510584	0.4883	0.172497	0.331093
SMc02065	tatC	tatC; sec-independent protein translocase protein TatC	130.38	136.78	148.59	195.99	167.82	170.94	0.588057	0.295057	0.202153	0.3631	0.730273	0.852991
SMc02725	trpEG	trpEG; anthranilate synthase [EC:4.1.3.27]	1573.02	1715.69	1660.42	1777.69	1770.94	1857.88	0.176467	0.0457264	0.162109	0.1275	0.0793463	0.179555
SMc03097	trxL		199.79	193.56	202.66	228.16	245.01	231.58	0.191562	0.34006	0.192449	0.2418	0.477949	0.665317
SMc00387	tyrB	tyrB; aromatic-amino-acid transaminase [EC:2.6.1.57]	85.88	88.78	105.49	159.71	179.41	159.21	0.895061	1.01495	0.593825	0.8309	5.60716e-05	0.000306986
SMa1321	virB1	virB1; type IV secretion system protein VirB1	1.57	0.68	1.32	1.1	1.39	0.39	-0.513261	1.03148	-1.75899	-0.3099	0.411515	0.6041
SMc01721	yidC	yidC, spoIIIJ, OXA1, ccfA; YidC/Oxa1 family membrane protein insertase	1582.23	1460.61	1482.33	1271.9	1168.03	1343.69	-0.314974	-0.322494	-0.141666	-0.2582	2.5309e-06	1.8077e-05

## Sheet: 10 dpi
Table S10:Expression of rhizobia genes involved in defence.
Gene ID	Gene Name	Description	WT-10dpi_CPM	WT-10dpi_CPM	WT-10dpi_CPM	nad1-1-10dpi_CPM	nad1-1-10dpi_CPM	nad1-1-10dpi_CPM	Log2FC-1	Log2FC-2	Log2FC-3	Log2FC-mean	Pvalue-mean	FDR
SMc01345	accC	accC; acetyl-CoA carboxylase, biotin carboxylase subunit [EC:6.4.1.2 6.3.4.14]	496.71	1294.32	1294.32	1197.4	1185.65	1192.3	0.844996	1.23645	1.01221	1.023	0.0198965	0.0365396
SMc02764	accD	accD; acetyl-CoA carboxylase carboxyl transferase subunit beta [EC:6.4.1.2 2.1.3.15]	165.57	344.31	344.31	374.12	412.6	390.78	0.999826	1.00466	1.05082	1.0182	0.010905	0.0212565
SMb21184	ackA	ackA; acetate kinase [EC:2.7.2.1]	10.51	13.52	13.52	76.69	65.83	80	3.05785	3.18388	3.14971	3.1307	4.76378e-45	1.14441e-43
SMc03846	acnA	ACO, acnA; aconitate hydratase [EC:4.2.1.3]	9501.83	2913.34	2913.34	2054.77	2102.18	2189.6	-2.11251	-2.4696	-2.47676	-2.3568	1.50884e-190	9.38801e-188
SMc01640	ACSS1_2	ACSS1_2, acs; acetyl-CoA synthetase [EC:6.2.1.1]	9.47	15.55	15.55	17.32	18.08	18.78	1.06042	1.75768	1.78041	1.548	0.00124102	0.00286623
SMa2363	amiE	E3.5.1.4, amiE; amidase [EC:3.5.1.4]	9.73	18.25	18.25	29.41	35.47	26.8	1.39338	1.64085	1.12631	1.4006	0.00778311	0.0156215
SMc04386	aspB	aspB; aspartate aminotransferase [EC:2.6.1.1]	182.31	181.39	181.39	379.07	299.25	385.89	1.49175	1.4069	1.50487	1.468	8.06177e-13	4.76809e-12
SMc03879	atoB	ACAT, atoB; acetyl-CoA C-acetyltransferase [EC:2.3.1.9]	125.99	245.61	245.61	453.01	567.91	422.86	1.77829	1.84737	1.78639	1.8035	1.00197e-22	1.01535e-21
SMb20999	bacA	bacA	285.59	1734.17	1734.17	2653.75	2384.05	2172.39	2.65933	3.37744	2.94592	2.9863	1.4644e-75	7.40772e-74
SMc00115	catE	catE; catechol 2,3-dioxygenase [EC:1.13.11.2]	19.2	25.01	25.01	87.41	58.41	64.74	2.35123	1.82918	2.47982	2.2016	1.35512e-18	1.13633e-17
SMa0612	ccoN	ccoN; cytochrome c oxidase cbb3-type subunit I [EC:7.1.1.9]	104.06	67.83	67.83	213.59	202.36	191.09	1.4017	1.13597	1.16182	1.2353	0.000115221	0.000311292
SMa0765	ccoN	ccoN; cytochrome c oxidase cbb3-type subunit I [EC:7.1.1.9]	5277.47	2854.3	2854.3	1353.54	1194.69	1293.81	-1.09045	-0.917723	-1.12584	-1.0446	1.74682e-86	1.15624e-84
SMa0615	ccoO	ccoO; cytochrome c oxidase cbb3-type subunit II	12.59	7.44	7.44	36.83	39.17	38.14	2.19629	1.80815	2.09184	2.0423	1.70471e-11	9.06555e-11
SMa0766	ccoO	ccoO; cytochrome c oxidase cbb3-type subunit II	1675.29	797.01	797.01	359.28	301.34	405.26	-1.18785	-0.969139	-1.28656	-1.149	2.36024e-80	1.37247e-78
SMa0617	ccoP	ccoP; cytochrome c oxidase cbb3-type subunit III	18.56	13.07	13.07	32.99	35.7	35.99	1.52572	1.49315	1.49581	1.5051	1.22876e-05	3.78859e-05
SMa0769	ccoP	ccoP; cytochrome c oxidase cbb3-type subunit III	1414.61	613.58	613.58	296.88	328.23	294.95	-1.11547	-0.982858	-1.09082	-1.0636	1.13315e-90	8.29463e-89
SMa1552	cheR	cheR; chemotaxis protein methyltransferase CheR [EC:2.1.1.80]	3.11	5.63	5.63	10.45	10.2	9	1.7499	1.95883	1.23008	1.6271	0.0102248	0.0200121
SMc00653	cheY	cheY; two-component system, chemotaxis family, chemotaxis protein CheY	9.21	31.32	31.32	33.54	41.26	25.82	1.87105	1.75768	1.27865	1.6296	8.3286e-05	0.000228889
SMc02175	crp	crp; CRP/FNR family transcriptional regulator, cyclic AMP receptor protein	46.06	82.92	82.92	91.81	114.04	99.75	1.10595	1.17804	1.54112	1.2783	0.000204889	0.000537672
SMc01983	ctaD	coxA, ctaD; cytochrome c oxidase subunit I [EC:7.1.1.9]	244.98	42.59	42.59	78.34	72.32	77.65	-0.870539	-1.24227	-1.15927	-1.0976	5.46854e-40	1.08017e-38
SMc00013	ctaE	coxC, ctaE; cytochrome c oxidase subunit III [EC:7.1.1.9]	207.09	641.3	641.3	595.68	649.73	616.1	0.981596	1.13191	1.23985	1.1126	0.000890639	0.00211349
SMb21578	ctpA	copA, ctpA, ATP7; P-type Cu+ transporter [EC:7.2.2.8]	46.32	72.78	72.78	263.89	248.72	237.83	2.54485	2.16125	2.4382	2.386	7.82054e-35	1.21648e-33
SMc02897	CYC	CYC; cytochrome c	420.15	1159.79	1159.79	905.47	1058.16	988.89	0.956161	1.00124	1.32994	1.087	0.00199842	0.00444555
SMb20172	CYC	CYC; cytochrome c	1.43	7.66	7.66	14.02	55.17	10.76	3.70044	4.12032	4.17975	4.0315	1.07752e-20	9.97665e-20
SMc02255	cydA	cydA; cytochrome bd ubiquinol oxidase subunit I [EC:7.1.1.7]	214.36	84.27	84.27	85.49	114.97	101.51	-1.10698	-1.3838	-1.23284	-1.2435	5.35751e-57	1.81165e-55
SMc02857	dnaK	dnaK, HSPA9; molecular chaperone DnaK	2391.55	4102.65	4102.65	5364.95	4476.26	5442.41	1.06122	1.04324	1.30768	1.1365	1.91318e-05	5.74507e-05
SMb20942	exoB	exoB	12.98	42.36	42.36	65.42	82.52	57.7	1.96655	2.00052	2.21212	2.054	1.81942e-12	1.04144e-11
SMb20945	exoF1	exoF1	26.47	65.57	65.57	100.88	105	82.15	2.08993	2.16022	2.31509	2.191	1.09518e-24	1.22779e-23
SMb20951	exoI	exoI	129.76	55.66	55.66	124.25	82.75	84.1	0.150824	-0.0216336	-0.0985246	0.0053	1.74905e-09	8.01958e-09
SMb20961	exoP	exoP, vpsO; polysaccharide biosynthesis transport protein	65.92	106.81	106.81	177.3	181.27	144.54	1.64126	1.52788	1.7502	1.6401	1.90087e-14	1.232e-13
SMb20944	exoQ	exoQ	13.49	34.25	34.25	39.31	48.21	44.4	1.74794	1.63617	1.98391	1.7919	3.29438e-08	1.34853e-07
SMb20950	exoT	exoT	15.96	20.96	20.96	42.06	44.97	31.69	1.1267	0.951549	0.930532	0.996	0.252431	0.33464
SMb20948	exoU	exoU	35.42	27.49	27.49	53.88	60.27	43.03	0.450741	0.365438	0.531679	0.4497	0.0377975	0.0647512
SMb20949	exoV	exoV	17.65	27.72	27.72	39.86	45.9	36.18	1.14787	1.52895	1.3816	1.3561	0.00126752	0.00292201
SMb20947	exoX	exoX	213.58	92.16	92.16	122.87	129.34	100.14	-0.957535	-1.12078	-1.14546	-1.0852	1.65824e-32	2.3449e-31
SMb20946	exoY	exoY	51.77	98.47	98.47	153.11	162.95	113.05	1.55569	1.55389	2.03977	1.725	4.23379e-13	2.54272e-12
SMb20943	exoZ	exoZ	7.53	14.2	14.2	19.24	22.48	16.62	1.30381	1.65697	2.02903	1.6705	0.0014337	0.0032832
SMb20941	exsA	exsA	45.16	116.27	116.27	90.71	109.41	110.9	1.16779	0.986439	1.21979	1.1276	0.0102561	0.0200672
SMb20940	exsB	exsB,queC	22.84	30.19	30.19	17.87	28.05	23.27	-0.358875	0.325156	0.593795	0.2117	0.0061929	0.0126667
SMb20939	exsC	exsC,queD	0.78	2.03	2.03	1.1	1.39	0.78	1.31451	-0.636309	0.0703893	0.2729	0.540515	0.62604
SMb20938	exsD	exsD,queE	7.79	10.82	10.82	9.9	9.5	11.34	0.669481	0.16396	0.492851	0.4572	0.295464	0.381961
SMb20937	exsE	exsE	26.08	58.36	58.36	96.48	123.32	101.12	1.92084	2.2438	2.13979	2.0994	3.56479e-20	3.1868e-19
SMb20934	exsF	exsF	8.56	12.17	12.17	12.37	11.82	9.19	0.487352	0.691137	0.840573	0.6709	0.714258	0.774641
SMb20933	exsG	exsG	24.78	28.39	28.39	57.45	50.07	32.86	1.50804	1.54594	1.27677	1.4415	1.51379e-05	4.60802e-05
SMb20932	exsH	exsH	15.31	14.42	14.42	19.79	24.11	20.34	0.338605	0.82281	0.603809	0.595	0.41585	0.505472
SMb20935	exsI	exsI	20.24	45.07	45.07	55.53	67.69	42.25	0.751716	1.27129	1.17338	1.07	0.137819	0.199978
SMc03054	flhA	flhA; flagellar biosynthesis protein FlhA	39.97	17.35	17.35	17.32	22.48	16.43	-0.934725	-1.21422	-1.60337	-1.2402	3.80065e-23	3.92818e-22
SMc03018	flhB	flhB; flagellar biosynthetic protein FlhB	78.24	31.77	31.77	22.82	16.69	17.99	-1.7279	-1.87178	-1.5254	-1.7087	6.18946e-49	1.65283e-47
SMc03037	fliC	fliC; flagellin	22.58	45.52	45.52	53.33	68.38	53	0.967368	1.40122	1.31126	1.2229	0.00921911	0.0182215
SMc03019	fliG	fliG; flagellar motor switch protein FliG	43.6	14.65	14.65	10.72	17.38	11.34	-1.0873	-1.39478	-1.04466	-1.176	3.95191e-25	4.49521e-24
SMc03891	fliY	fliY, tcyA; L-cystine transport system substrate-binding protein	56.31	172.38	172.38	232.55	239.68	202.04	1.20405	1.43348	1.44144	1.3635	4.2188e-06	1.37181e-05
SMc03854	ftsY	ftsY; fused signal recognition particle receptor	134.69	338.23	338.23	331.51	351.17	382.96	1.00902	1.14141	1.03761	1.0607	0.00723264	0.0145872
SMb21009	glpK	glpK, GK; glycerol kinase [EC:2.7.1.30]	41.91	61.97	61.97	104.46	154.38	99.55	1.54588	1.52789	1.48753	1.5213	5.93535e-09	2.59521e-08
SMc02087	gltA	CS, gltA; citrate synthase [EC:2.3.3.1]	67529.9	23040.8	23040.8	15590.2	12253.1	16161.4	-1.33947	-1.35668	-1.48351	-1.393	2.18323e-129	3.67137e-127
SMb21566	groEL	groEL, HSPD1; chaperonin GroEL	71.89	194.69	194.69	216.34	158.09	187.37	1.13953	0.803534	1.56516	1.1877	0.00359488	0.0076943
SMc00538	grx2	grx2	467.64	1028.87	1028.87	1401.37	1159.22	1207.95	1.27826	1.30625	1.58137	1.3895	8.67604e-11	4.38168e-10
SMc02443	grxC	grxC	453.63	228.26	228.26	614.65	535.22	602.8	0.231157	0.112133	0.0769967	0.1316	6.88046e-06	2.18978e-05
SMc00825	gshA	gsh1,gshA	158.95	295.86	295.86	297.15	316.64	316.07	0.624974	0.121491	0.75259	0.5	0.029842	0.0525254
SMc00419	gshB1	gshB1	120.54	270.63	270.63	224.31	219.51	237.83	0.810736	0.630902	1.07054	0.8385	0.542506	0.62778
SMb21586	gshB2	gshB2	2.98	4.06	4.06	3.57	4.64	3.72	1.22585	0.7486	0.647162	0.8792	0.795885	0.842641
SMc00914	hcaD	hcaD; 3-phenylpropionate/trans-cinnamate dioxygenase ferredoxin reductase component [EC:1.18.1.3]	141.82	326.06	326.06	356.53	357.67	385.31	1.01674	1.57403	1.37974	1.3209	2.2279e-06	7.5092e-06
SMb20820	hcaD	hcaD; 3-phenylpropionate/trans-cinnamate dioxygenase ferredoxin reductase component [EC:1.18.1.3]	171.93	43.04	43.04	20.62	39.17	27.38	-1.96134	-1.89992	-1.73753	-1.8569	2.24581e-73	1.08321e-71
SMa0387	hisC	hisC; histidinol-phosphate aminotransferase [EC:2.6.1.9]	11.55	52.28	52.28	76.69	78.81	55.16	2.28139	2.35432	2.27023	2.3011	3.21894e-17	2.4849e-16
SMa1191	hmp	hmp	41.52	95.77	95.77	86.59	122.85	91.34	1.69851	1.32103	1.75947	1.5893	4.26458e-09	1.88856e-08
SMb21183	htpG	HSP90A, htpG; molecular chaperone HtpG	249	484.92	484.92	668.8	763.78	721.91	1.32596	1.41937	1.78382	1.5245	6.48531e-10	3.08263e-09
SMc00819	katA	katC	1408.51	4850.53	4850.53	5024.64	5280.83	5624.7	1.69542	1.73472	1.71838	1.7143	8.61618e-13	5.09116e-12
SMa2379	katB	katG; catalase-peroxidase [EC:1.11.1.21]	36.72	115.82	115.82	160.53	195.64	161.95	2.35763	2.06864	2.40997	2.2776	3.82474e-32	5.31195e-31
SMb20007	katC	lsrA	21.28	13.52	13.52	23.37	13.91	12.91	0.369409	0.442657	0.501111	0.44	0.0814201	0.126617
SMc00037	lsrA	katE, CAT, catB, srpA; catalase [EC:1.11.1.6]	24.78	31.32	31.32	34.91	41.72	36.97	0.686851	0.874104	0.832674	0.7988	0.832576	0.873415
SMc01225	lsrB	lsrB	874.69	878.13	878.13	603.92	634.9	611.6	-0.0230099	-0.101015	-0.120935	-0.0812	4.50204e-21	4.23137e-20
SMc04255	manB	E3.2.1.25, MANBA, manB; beta-mannosidase [EC:3.2.1.25]	12.46	15.32	15.32	25.29	29.21	19.75	0.719727	1.61708	1.85474	1.4238	0.00576093	0.0118416
SMc03992	motB	motB; chemotaxis protein MotB	59.95	99.82	99.82	162.73	171.3	161.56	1.16856	1.13045	1.02181	1.1116	0.00725125	0.01462
SMb20757	MUT	MUT; methylmalonyl-CoA mutase [EC:5.4.99.2]	17.13	39.43	39.43	90.44	89.94	79.21	2.44582	2.40385	2.10246	2.3245	1.54693e-22	1.55242e-21
SMa1245	nnrR	nnrR	19.98	37.41	37.41	34.36	48.21	42.83	1.1688	0.644268	1.28433	1.0322	0.14936	0.214524
SMa1194	nnrS	nnrS	12.72	31.55	31.55	14.84	21.33	14.67	1.15217	0.734618	0.733139	0.9032	0.498451	0.585191
SMa1283	nnrU	nnrU	70.72	110.64	110.64	83.29	81.82	102.49	0.531628	0.4057	0.784343	0.5881	0.18361	0.255961
SMa1273	norB	norB	7.92	22.98	22.98	15.39	20.17	24.45	0.553038	0.713344	1.07276	0.8211	0.962935	0.973733
SMa1276	norC	norC	0.91	4.06	4.06	3.3	3.25	3.32	1.09212	1.63048	2.22853	1.7979	0.109335	0.163884
SMa1269	norD	norD	6.49	20.28	20.28	16.22	18.08	19.56	1.42528	0.943513	1.538	1.3226	0.0507399	0.0836301
SMa1279	norE	norE	2.72	15.1	15.1	12.09	11.13	13.3	2.23221	1.00753	3.12785	2.001	0.000745169	0.00178944
SMa1272	norQ	norQ	2.98	8.56	8.56	5.77	10.66	8.61	0.755246	0.452924	1.45329	0.9195	0.784755	0.833233
SMc03185	NQO1	NQO1; NAD(P)H dehydrogenase (quinone) [EC:1.6.5.2]	11.42	16.9	16.9	25.56	25.27	24.06	1.04845	1.06204	1.90725	1.3345	0.0167352	0.0312129
SMa1533	nuoA	nuoA; NADH-quinone oxidoreductase subunit A [EC:7.1.1.2]	15.44	11.94	11.94	52.5	35.47	34.81	1.8325	1.59833	1.58774	1.6687	3.32529e-07	1.23008e-06
SMa1532	nuoB	nuoB; NADH-quinone oxidoreductase subunit B [EC:7.1.1.2]	6.62	3.83	3.83	24.74	15.99	24.84	2.20816	2.04924	1.84869	2.0512	1.67471e-07	6.36533e-07
SMa1531	nuoC	nuoC; NADH-quinone oxidoreductase subunit C [EC:7.1.1.2]	5.84	2.7	2.7	20.34	16.23	21.12	2.01597	1.59683	1.66111	1.7501	9.05535e-05	0.000247441
SMa1529	nuoD	nuoD; NADH-quinone oxidoreductase subunit D [EC:7.1.1.2]	13.75	6.99	6.99	45.08	34.31	36.38	2.06914	1.34147	1.877	1.7676	8.6008e-08	3.38055e-07
SMa1526	nuoE	nuoE; NADH-quinone oxidoreductase subunit E [EC:7.1.1.2]	0.91	1.13	1.13	8.52	5.79	3.52	3.29149	1.40562	1.12703	1.8058	0.0215191	0.0391154
SMa1519	nuoI	nuoI; NADH-quinone oxidoreductase subunit I [EC:7.1.1.2]	5.19	4.06	4.06	13.74	9.04	9.78	1.84072	2.19759	1.75339	1.9478	2.29524e-05	6.82646e-05
SMa1545	nuoJ	nuoJ; NADH-quinone oxidoreductase subunit J [EC:7.1.1.2]	17.91	11.49	11.49	62.95	44.27	46.55	1.8436	1.77586	1.68276	1.7629	2.60824e-09	1.1794e-08
SMa1536	nuoM	nuoM; NADH-quinone oxidoreductase subunit M [EC:7.1.1.2]	3.11	2.03	2.03	10.45	10.89	11.74	2.24279	2.01377	1.69356	1.9812	0.00011522	0.000311292
SMc00818	oxyR	oxyR	129.63	159.31	159.31	709.48	457.11	527.69	2.41721	2.23744	2.44958	2.3623	5.75927e-37	9.73755e-36
SMb21640	paaA	paaA; ring-1,2-phenylacetyl-CoA epoxidase subunit PaaA [EC:1.14.13.149]	243.55	65.35	65.35	426.62	200.51	309.61	1.23852	0.831802	1.09587	1.0467	0.0272396	0.048369
SMc02562	pckA	E4.1.1.49, pckA; phosphoenolpyruvate carboxykinase (ATP) [EC:4.1.1.49]	259.38	587.22	587.22	663.02	910.04	717.61	1.31372	0.731458	1.82403	1.3266	0.000377133	0.000948472
SMc00187	petA	UQCRFS1, RIP1, petA; ubiquinol-cytochrome c reductase iron-sulfur subunit [EC:7.1.1.8]	5076.34	2473.04	2473.04	983.54	1055.84	1054.02	-1.98737	-1.98031	-2.26645	-2.0793	7.35418e-169	2.54209e-166
SMc00189	petC	CYC1, CYT1, petC; ubiquinol-cytochrome c reductase cytochrome c1 subunit	6601.37	3140.93	3140.93	1546.78	1548.18	1665.82	-1.80545	-1.71707	-1.92847	-1.817	1.3221e-172	4.8389e-170
SMc01110	phrR	phrR	582.22	521.65	521.65	916.19	820.34	782.55	0.421743	0.494271	0.592073	0.5038	0.00539706	0.01116
SMc03239	ppa	ppa; inorganic pyrophosphatase [EC:3.6.1.1]	125.09	396.59	396.59	341.96	337.04	328.39	1.1382	1.26104	1.5578	1.3127	2.00288e-06	6.78017e-06
SMc03895	pyc	PC, pyc; pyruvate carboxylase [EC:6.4.1.1]	275.73	633.86	633.86	701.23	702.58	676.73	1.02207	1.09544	1.2209	1.1115	0.00024676	0.000637864
SMa0203	rbsB	rbsB; ribose transport system substrate-binding protein	5.45	9.24	9.24	11.55	16.69	7.82	1.22956	1.91164	1.37163	1.5078	0.0167771	0.0312818
SMa2000	rbsB	rbsB; ribose transport system substrate-binding protein	3.76	7.21	7.21	23.64	32.22	21.12	2.33568	2.14483	2.83898	2.4666	2.753e-09	1.24035e-08
SMb20931	rbsB	rbsB; ribose transport system substrate-binding protein	25.3	38.31	38.31	74.22	95.04	62.98	1.73845	1.77672	1.93263	1.8184	2.14199e-12	1.21934e-11
SMb20720	rbsB	rbsB; ribose transport system substrate-binding protein	117.04	27.04	27.04	13.47	20.63	16.62	-1.9539	-1.88853	-1.94935	-1.9282	3.24197e-66	1.3538e-64
SMb21377	rbsB	rbsB; ribose transport system substrate-binding protein	10.64	30.87	30.87	56.63	54.24	64.94	1.61227	1.93546	2.18664	1.9151	3.48369e-08	1.42321e-07
SMb20880	rhlE	rhlE; ATP-dependent RNA helicase RhlE [EC:3.6.4.13]	243.03	859.42	859.42	631.41	741.76	823.23	1.03837	1.81878	1.5327	1.4685	3.93116e-08	1.59972e-07
SMc01336	rne	rne; ribonuclease E [EC:3.1.26.12]	726.64	2355.19	2355.19	2709.55	2610.28	2907.99	1.63105	2.0678	1.94755	1.8645	6.1964e-17	4.7139e-16
SMc03863	rplS	RP-L19, MRPL19, rplS; large subunit ribosomal protein L19	653.07	1914.89	1914.89	1569.05	1579.48	1611.84	0.992325	1.13723	1.27616	1.1232	0.00245664	0.00538972
SMc00704	rpmB	RP-L28, MRPL28, rpmB; large subunit ribosomal protein L28	363.97	1261.42	1261.42	838.13	997.89	832.81	0.873521	1.10595	1.26193	1.0644	0.0168246	0.0313609
SMc00335	rpsA	RP-S1, rpsA; small subunit ribosomal protein S1	2051.58	6653.65	6653.65	5157.69	4826.74	5641.13	0.894127	1.13645	1.18852	1.0623	0.00743422	0.0149646
SMc02101	rpsB	RP-S2, MRPS2, rpsB; small subunit ribosomal protein S2	776.85	2466.05	2466.05	2218.33	1685.18	2113.91	1.30042	1.49839	1.45193	1.4085	1.13056e-07	4.3773e-07
SMc04458	secA	secA; preprotein translocase subunit SecA [EC:7.4.2.8]	1167.03	2629.64	2629.64	3120.51	2736.85	3281.37	1.33467	1.28386	1.44463	1.3521	7.31587e-10	3.45892e-09
SMc01289	secY	secY; preprotein translocase subunit SecY	263.41	798.13	798.13	717.73	681.95	737.56	1.13319	1.17449	1.37066	1.2202	2.15595e-05	6.44406e-05
SMa1325	SMa1325	GST, gst; glutathione S-transferase [EC:2.5.1.18]	8.95	2.25	2.25	3.3	3.01	3.72	-1.94776	-1.94171	-0.541091	-1.3339	1.49912e-08	6.32373e-08
SMb20005	SMb20005	GST, gst; glutathione S-transferase [EC:2.5.1.18]	12.98	2.7	2.7	1.37	3.25	2.54	-0.818513	-0.790144	-2.66508	-1.2617	1.1789e-09	5.48215e-09
SMc01443	SMc01443	GST, gst; glutathione S-transferase [EC:2.5.1.18]	219.94	61.74	61.74	47.28	60.04	53.79	-1.92075	-1.82676	-1.91368	-1.8853	2.98629e-86	1.95586e-84
SMc00043	sodB	sodB	2099.85	2392.82	2392.82	2284.85	2066.02	2222.07	-0.138838	-0.193209	-0.0463984	-0.1265	3.3086e-26	3.91371e-25
SMc02597	sodC	sodC	41.52	30.42	30.42	34.64	31.06	37.55	-0.129707	-0.264665	-0.485141	-0.2837	8.45359e-10	3.97268e-09
SMb20019	sucB	DLST, sucB; 2-oxoglutarate dehydrogenase E2 component (dihydrolipoamide succinyltransferase) [EC:2.3.1.61]	5.06	5.41	5.41	95.94	64.21	70.41	4.8809	4.65462	5.1945	4.9006	9.7703e-106	9.49856e-104
SMc02067	tatA	tatA; sec-independent protein translocase protein TatA	54.5	146.69	146.69	160.26	165.27	150.99	1.04803	1.53362	1.45564	1.3471	1.46825e-05	4.48475e-05
SMc02066	tatB	tatB; sec-independent protein translocase protein TatB	61.5	158.18	158.18	215.79	203.06	213.58	1.75487	1.97355	1.98047	1.8941	2.53373e-18	2.09361e-17
SMc02065	tatC	tatC; sec-independent protein translocase protein TatC	56.05	136.78	136.78	195.99	167.82	170.94	1.50215	1.6016	1.54102	1.5465	3.52331e-10	1.714e-09
SMc02725	trpEG	trpEG; anthranilate synthase [EC:4.1.3.27]	507.61	1715.69	1715.69	1777.69	1770.94	1857.88	1.34505	1.59379	1.55675	1.4915	2.75709e-12	1.55105e-11
SMc03097	trxL		80.45	193.56	193.56	228.16	245.01	231.58	1.27857	1.32556	1.40755	1.3353	3.2404e-06	1.06959e-05
SMc00387	tyrB	tyrB; aromatic-amino-acid transaminase [EC:2.6.1.57]	56.7	88.78	88.78	159.71	179.41	159.21	1.59392	1.31802	1.51623	1.4785	6.66728e-09	2.89287e-08
SMa1321	virB1	virB1; type IV secretion system protein VirB1	1.43	0.68	0.68	1.1	1.39	0.39	0.440042	-2.3468	-2.0114	-1.0583	0.0212658	0.0386888
SMc01721	yidC	yidC, spoIIIJ, OXA1, ccfA; YidC/Oxa1 family membrane protein insertase	520.45	1460.61	1460.61	1271.9	1168.03	1343.69	0.967453	1.12128	1.17826	1.0823	0.00298626	0.00646954
