# Supplementary material for: Dual RNA-Seq Analysis Pinpoints to a BalancedRegulation between Symbiosis and Immunity in the Medicago truncatula-Sinorhizobium meliloti Symbiotic Interactions
Source: Preprints.org preprint supplement (doi:10.20944/preprints202309.0662.v1), 2023-09-11
Supplement: Supplementary file 5 [file Table S2.xlsx]

## Sheet: 6 dpi
Table S2: Annotated list of rhizobial genes that are differentially expressed in nad1-1 nodules relative to wild type nodules.
We considered rhizobial genes to be differentially expressed if the log2-fold change relative to wild type nodules was greater than 1 and if the adjusted P-Value was below 0.05.
Table legend: 'NA' means data not available
Gene ID	Gene Name	WT-1 (CPM)	WT-2 (CPM)	WT-3 (CPM)	nad1-1-1 (CPM)	nad1-1-2 (CPM)	nad1-1-3(CPM)	WT_mean	nad1-1_mean	log2(fc)	PValue	FDR	COG_category	Description	GOs	KEGG_ko
SMa0817	fixC	3737.17	4692.12	3657.72	235.03	345.84	331.91	4029	304.26	-3.727	1.80385e-157	1.12091e-153	C	FAD dependent oxidoreductase	-	ko:K00313
SMa0822	fixA	6870.46	8643.12	6377.18	351.03	538.93	584.02	7296.92	491.327	-3.8925	1.18895e-131	3.69408e-128	C	Electron transfer flavoprotein domain	GO:0003674,GO:0003824,GO:0005575,GO:0005622,GO:0005623,GO:0005737,GO:0005829,GO:0006091,GO:0008150,GO:0008152,GO:0009055,GO:0009987,GO:0016491,GO:0022900,GO:0044237,GO:0044424,GO:0044444,GO:0044464,GO:0055114	ko:K03521
SMa0827	nifD	6639.5	7093.5	6181.7	348.56	616.58	588.72	6638.23	517.953	-3.6799	3.08437e-126	6.38877e-123	C	protein alpha chain	-	ko:K02586
SMa0819	fixB	4796.89	6216.73	4466.09	247.4	321.04	424.82	5159.9	331.087	-3.9621	3.00752e-122	4.67218e-119	C	Electron transfer flavoprotein FAD-binding domain	GO:0000166,GO:0003674,GO:0003824,GO:0005488,GO:0006082,GO:0006091,GO:0006629,GO:0006631,GO:0006635,GO:0008150,GO:0008152,GO:0009055,GO:0009056,GO:0009062,GO:0009987,GO:0016042,GO:0016054,GO:0016491,GO:0019395,GO:0019752,GO:0022900,GO:0030258,GO:0032787,GO:0033539,GO:0034440,GO:0036094,GO:0043167,GO:0043168,GO:0043436,GO:0044237,GO:0044238,GO:0044242,GO:0044248,GO:0044255,GO:0044281,GO:0044282,GO:…	ko:K03522
SMa0825	nifH	6780.67	8681.2	6234.83	352.4	573.47	606.13	7232.23	510.667	-3.824	2.49235e-118	3.09749e-115	D	The key enzymatic reactions in nitrogen fixation are catalyzed by the nitrogenase complex, which has 2 components the iron protein and the molybdenum-iron protein	-	ko:K02588
SMa0831	nifX	1357.54	1715.46	1249.05	82.74	116.59	137.11	1440.68	112.147	-3.6833	7.38903e-117	7.65257e-114	S	Dinitrogenase iron-molybdenum cofactor	-	ko:K02596
SMb20020		44.51	37.86	46.88	971.72	619.37	812.67	43.0833	801.253	4.2171	4.4031e-111	3.9087e-108	C	Transketolase, pyrimidine binding domain	-	ko:K11381
SMa0816	fixX	547.21	655.5	511.57	40.68	71.63	61.61	571.427	57.9733	-3.3011	1.15177e-104	8.94636e-102	C	Could be a 3Fe-4S cluster-containing protein	-	ko:K03855
SMa0811	fdxN	403.89	465.31	374.88	64.87	61.19	65.52	414.693	63.86	-2.6991	3.10269e-103	2.14224e-100	C	4Fe-4S binding domain	-	-
SMa0830	nifE	3738.74	4276.61	3319.32	201.22	391.97	358.9	3778.22	317.363	-3.5735	3.90936e-100	2.42927e-97	C	cofactor biosynthesis protein nifE	-	ko:K02587
SMa0872		298.02	255.98	296.43	35.74	42.65	48.7	283.477	42.3633	-2.7423	2.34148e-94	1.32272e-91	#N/A	#N/A	#N/A	#N/A
SMa0873	nifN	1080.31	1004.99	1163.97	110.78	141.17	181.11	1083.09	144.353	-2.9075	1.06587e-90	5.51944e-88	C	Nitrogenase component 1 type Oxidoreductase	-	ko:K02592
SMa0829	nifK	3931.27	4065.69	3531.05	197.37	428.36	394.89	3842.67	340.207	-3.4976	5.21089e-86	2.49081e-83	C	This molybdenum-iron protein is part of the nitrogenase complex that catalyzes the key enzymatic reactions in nitrogen fixation	-	ko:K02591
SMa0874	nodN	164.11	149.17	182.62	17.04	23.88	25.62	165.3	22.18	-2.8978	4.98746e-84	2.21372e-81	I	nodulation protein	-	-
SMa0814	nifB	4346.34	4840.17	4099.9	791.12	634.43	857.65	4428.8	761.067	-2.5408	6.39155e-83	2.64781e-80	C	cofactor biosynthesis protein NifB	-	ko:K02585
SMa0838		364.48	416.87	320.63	40.41	46.36	62.78	367.327	49.85	-2.8814	2.2916e-75	8.90001e-73	#N/A	#N/A	#N/A	#N/A
SMa0834	fdxB	90.78	102.3	81.29	6.6	11.36	9	91.4567	8.98667	-3.3472	1.33195e-69	4.86866e-67	C	4Fe-4S dicluster domain	-	-
SMa0875		400.75	399.52	440.67	93.19	101.53	117.74	413.647	104.153	-1.9897	4.17883e-68	1.44262e-65	V	Belongs to the resistance-nodulation-cell division (RND) (TC 2.A.6) family	-	ko:K03296
SMc01513	hmuS	176.46	169.68	183	781.78	799.7	716.24	176.38	765.907	2.1185	9.29474e-64	3.03987e-61	P	Haem utilisation ChuX/HutX	-	ko:K07225
SMa0840	nodD1	463.89	550.04	417.23	67.62	98.05	104.64	477.053	90.1033	-2.4045	5.20855e-61	1.6183e-58	K	transcriptional regulator, lysr family	GO:0006355,GO:0008150,GO:0009889,GO:0010468,GO:0010556,GO:0019219,GO:0019222,GO:0031323,GO:0031326,GO:0050789,GO:0050794,GO:0051171,GO:0051252,GO:0060255,GO:0065007,GO:0080090,GO:1903506,GO:2000112,GO:2001141	ko:K14657
SMa0810	fixU	510.94	547.34	461.47	72.84	58.88	104.83	506.583	78.85	-2.6836	1.55649e-57	4.60574e-55	Q	NifT/FixU protein	-	ko:K02593
SMa0815	nifA	9615.55	10471.7	8793.6	2616.64	2071.35	2663.31	9626.95	2450.43	-1.974	8.13664e-57	2.29823e-54	KT	Sigma-54 interaction domain	-	ko:K02584
SMa0835		316.45	367.29	276.58	68.45	79.74	85.28	320.107	77.8233	-2.0403	8.07669e-55	2.18211e-52	#N/A	#N/A	#N/A	#N/A
SMc06737		22.35	23.89	26.84	204.79	156.7	194.81	24.36	185.433	2.9283	3.80681e-53	9.85646e-51	S	Protein of unknown function (DUF1194)	-	-
SMa0809		149.01	189.28	158.23	35.74	32.22	43.62	165.507	37.1933	-2.1538	1.05876e-48	2.63165e-46	-	-	-	-
SMc01724	msrB1	15.1	16.45	17.39	150.36	111.96	126.74	16.3133	129.687	2.9909	1.38384e-48	3.30739e-46	O	methionine sulfoxide reductase	-	ko:K07305
SMc02521	glpR	26.66	29.07	39.7	253.44	191	208.1	31.81	217.513	2.7736	1.51037e-46	3.47608e-44	K	Transcriptional	-	ko:K02444
SMc00496	MA20_09035	1031.1	950.23	998.37	438.72	438.56	422.86	993.233	433.38	-1.1965	8.21555e-46	1.82326e-43	S	Domain of unknown function (DUF1476)	-	-
SMc01629	eryD	48.23	32.22	57.09	314.47	289.05	270.89	45.8467	291.47	2.6685	9.08758e-46	1.94725e-43	K	Putative sugar-binding domain	-	-
SMb20589	pcaF	19.21	19.15	21.55	173.73	124.01	128.7	19.97	142.147	2.8315	1.07158e-43	2.2196e-41	I	Belongs to the thiolase family	-	ko:K00626,ko:K00632,ko:K07823
SMc00187	petA	2196.11	2473.04	2295.62	983.54	1055.84	1054.02	2321.59	1031.13	-1.1709	7.09402e-43	1.42201e-40	C	Component of the ubiquinol-cytochrome c reductase complex (complex III or cytochrome b-c1 complex), which is a respiratory chain that generates an electrochemical potential coupled to ATP synthesis	-	ko:K00411
SMb20019		6.67	5.41	6.99	95.94	64.21	70.41	6.35667	76.8533	3.5958	1.46509e-42	2.84502e-40	C	e3 binding domain	-	ko:K00658
SMc01820	amaB	319.98	316.59	370.72	1426.11	1197.47	1321.98	335.763	1315.19	1.9698	5.58253e-40	1.05121e-37	E	the allantoate amidohydrolase from Escherichia coli forms a dimer and binds zinc ions for catalytic activity and catalyzes the conversion of allantoate to (S)-ureidoglycolate and ammonia	GO:0003674,GO:0005488,GO:0005515,GO:0042802	ko:K06016
SMc00338		139.79	132.72	135.36	827.13	563.73	652.48	135.957	681.113	2.3247	5.95738e-39	1.0888e-36	S	BA14K-like protein	-	-
SMc01512	hmuT	117.25	96.67	95.47	485.45	419.56	442.42	103.13	449.143	2.1227	5.89326e-38	1.04631e-35	P	ABC-type hemin transport system, periplasmic component	-	ko:K02016
SMc00188	petB	5940.93	5965.71	5633.09	2800.54	2733.83	2819.78	5846.58	2784.72	-1.0701	2.94356e-37	5.08092e-35	C	Component of the ubiquinol-cytochrome c reductase complex (complex III or cytochrome b-c1 complex), which is a respiratory chain that generates an electrochemical potential coupled to ATP synthesis	-	ko:K00410,ko:K00412
SMc04350	macA	281.16	288.2	314.2	1521.22	1085.51	1286.38	294.52	1297.7	2.1395	4.83314e-37	7.99867e-35	M	Belongs to the membrane fusion protein (MFP) (TC 8.A.1) family	-	ko:K02005,ko:K13888
SMa2217		18.63	18.03	28.92	136.34	123.32	131.63	21.86	130.43	2.5769	4.89137e-37	7.99867e-35	H	3-octaprenyl-4-hydroxybenzoate carboxy-lyase	-	-
SMc01144	rph	1105.41	1057.72	1085.52	468.68	563.27	530.04	1082.88	520.663	-1.0565	2.20645e-36	3.51562e-34	J	Phosphorolytic exoribonuclease that removes nucleotide residues following the -CCA terminus of tRNA and adds nucleotides to the ends of RNA molecules by using nucleoside diphosphates as substrates	GO:0006139,GO:0006401,GO:0006725,GO:0006807,GO:0008150,GO:0008152,GO:0009056,GO:0009057,GO:0009987,GO:0016070,GO:0016072,GO:0016075,GO:0019439,GO:0034641,GO:0034655,GO:0034660,GO:0034661,GO:0043170,GO:0044237,GO:0044238,GO:0044248,GO:0044260,GO:0044265,GO:0044270,GO:0046483,GO:0046700,GO:0071704,GO:0090304,GO:1901360,GO:1901361,GO:1901575	ko:K00989
SMb20427	glnQ	142.34	137.68	154.07	655.33	516.45	554.88	144.697	575.553	1.9919	7.98781e-36	1.24091e-33	E	ABC transporter, ATP-binding protein	-	ko:K02028,ko:K09972,ko:K10010
SMa2215	hutC	24.51	25.91	38.57	153.11	158.09	137.11	29.6633	149.437	2.3328	6.69155e-35	1.01418e-32	K	UTRA	-	ko:K05836
SMb20622		86.86	83.82	89.61	26.94	32.22	28.95	86.7633	29.37	-1.5627	8.48519e-35	1.2554e-32	G	ATPases associated with a variety of cellular activities	-	ko:K02056,ko:K10441
SMb20587	catI	7.45	12.39	16.45	129.75	86.69	100.14	12.0967	105.527	3.1249	1.01336e-34	1.46442e-32	I	Coenzyme A transferase	-	ko:K01039
SMc02365	dop	1026.59	1004.09	1171.72	5414.7	3887.49	4033.99	1067.47	4445.39	2.0581	1.31726e-34	1.86032e-32	O	Belongs to the peptidase S1C family	GO:0003674,GO:0003824,GO:0004175,GO:0004252,GO:0005575,GO:0005623,GO:0006508,GO:0006807,GO:0008150,GO:0008152,GO:0008233,GO:0008236,GO:0016787,GO:0017171,GO:0019538,GO:0030288,GO:0030313,GO:0031975,GO:0042597,GO:0043170,GO:0044238,GO:0044464,GO:0070011,GO:0071704,GO:0140096,GO:1901564	ko:K04771
SMa1057		35.49	36.95	41.59	205.34	161.1	166.25	38.01	177.563	2.2239	1.45024e-34	2.00263e-32	P	metal ion binding	-	-
SMa1220	ccoN	2309.24	1863.51	1967.05	875.24	932.53	925.52	2046.6	911.097	-1.1676	1.964e-34	2.65311e-32	C	Belongs to the heme-copper respiratory oxidase family	GO:0005575,GO:0005623,GO:0005886,GO:0006091,GO:0006810,GO:0006811,GO:0006812,GO:0008150,GO:0008152,GO:0009060,GO:0009987,GO:0015672,GO:0015980,GO:0015988,GO:0015990,GO:0016020,GO:0022900,GO:0022904,GO:0034220,GO:0044237,GO:0044464,GO:0045333,GO:0051179,GO:0051234,GO:0055085,GO:0055114,GO:0071944,GO:0098655,GO:0098660,GO:0098662,GO:1902600	ko:K00404
SMc00611	lpiA	165.67	156.61	166.17	680.07	572.31	535.71	162.817	596.03	1.8721	4.87548e-34	6.446e-32	S	Uncharacterised conserved protein (DUF2156)	-	ko:K07027,ko:K14205
SMc04172	cyaH	59.21	57.91	73.73	277.91	239.68	276.95	63.6167	264.847	2.0577	3.5148e-33	4.5502e-31	T	Adenylate cyclase	-	-
SMa0765	ccoN	3260.54	2854.3	2730.81	1353.54	1194.69	1293.81	2948.55	1280.68	-1.2031	8.21251e-33	1.04148e-30	C	Belongs to the heme-copper respiratory oxidase family	GO:0005575,GO:0005623,GO:0005886,GO:0006091,GO:0006810,GO:0006811,GO:0006812,GO:0008150,GO:0008152,GO:0009060,GO:0009987,GO:0015672,GO:0015980,GO:0015988,GO:0015990,GO:0016020,GO:0022900,GO:0022904,GO:0034220,GO:0044237,GO:0044464,GO:0045333,GO:0051179,GO:0051234,GO:0055085,GO:0055114,GO:0071944,GO:0098655,GO:0098660,GO:0098662,GO:1902600	ko:K00404
SMa0769	ccoP	709.95	613.58	607.98	296.88	328.23	294.95	643.837	306.687	-1.0699	3.24209e-32	4.02926e-30	C	C-type cytochrome. Part of the cbb3-type cytochrome c oxidase complex	-	ko:K00406
SMc03099		63.13	63.77	72.97	371.1	251.97	323.5	66.6233	315.523	2.2436	4.41497e-32	5.32792e-30	T	Adenylate cyclase	-	ko:K01768
SMc00276		54.51	68.95	68.06	272.41	243.39	228.84	63.84	248.213	1.959	4.45851e-32	5.32792e-30	P	metal ion binding	-	-
SMa0771		342.92	319.75	331.21	145.96	107.79	129.48	331.293	127.743	-1.3749	8.54637e-32	1.00202e-29	#N/A	#N/A	#N/A	#N/A
SMc03900	ndvA	307.62	322.9	285.09	1638.32	1127.93	1198.56	305.203	1321.6	2.1144	1.03419e-31	1.19008e-29	V	Involved in beta-(1-- 2)glucan export. Transmembrane domains (TMD) form a pore in the inner membrane and the ATP- binding domain (NBD) is responsible for energy generation	GO:0003674,GO:0003824,GO:0005215,GO:0005319,GO:0006810,GO:0006869,GO:0008150,GO:0010876,GO:0015399,GO:0015405,GO:0016462,GO:0016787,GO:0016817,GO:0016818,GO:0016887,GO:0017111,GO:0022804,GO:0022857,GO:0033036,GO:0034040,GO:0042623,GO:0042626,GO:0043492,GO:0051179,GO:0051234,GO:0055085,GO:0071702	ko:K06147
SMc01511	hmuU	63.33	63.09	56.53	258.12	221.37	239.2	60.9833	239.563	1.9739	2.63389e-31	2.97581e-29	P	Belongs to the binding-protein-dependent transport system permease family. FecCD subfamily	-	ko:K02015
SMc02704	MA20_44650	43.72	46.64	48.77	181.42	169.44	181.9	46.3767	177.587	1.9371	3.22051e-31	3.57361e-29	S	conserved protein (some members contain a von Willebrand factor type A (vWA) domain)	-	-
SMc02703	moxR	175.08	147.59	178.27	613.55	536.15	594.39	166.98	581.363	1.7998	7.9285e-30	8.64346e-28	S	ATPase associated with various cellular activities	GO:0005575,GO:0005618,GO:0005623,GO:0030312,GO:0044464,GO:0071944	ko:K03924
SMa1176		881.89	602.99	616.49	246.85	243.62	266.78	700.457	252.417	-1.4725	9.07803e-30	9.72602e-28	K	Acetyltransferase (GNAT) family	-	-
SMb20428	ehuB	129.4	129.79	152.75	650.11	459.66	525.54	137.313	545.103	1.9891	8.27155e-29	8.29023e-27	ET	Bacterial periplasmic substrate-binding proteins	-	ko:K02030
SMc00563		25.29	27.72	29.49	158.06	111.73	126.94	27.5	132.243	2.2657	1.16553e-28	1.14962e-26	EGP	Major facilitator superfamily	-	-
SMa5036	antA	342.13	391.4	296.43	15.94	26.89	36.18	343.32	26.3367	-3.7044	6.57024e-28	6.37929e-26	P	Phenylpropionate dioxygenase and related ring-hydroxylating dioxygenases, large terminal subunit	-	ko:K00479
SMa2219	ubiX	4.12	4.06	6.62	42.06	41.49	43.62	4.93333	42.39	3.1031	9.01965e-28	8.62278e-26	H	Flavoprotein	-	ko:K03186
SMb21207		8.43	7.44	10.21	71.75	57.02	48.7	8.69333	59.1567	2.7666	1.09049e-27	1.02672e-25	M	secretion protein	-	ko:K01993
SMc01464		14.7	13.75	11.72	87.69	64.9	80.97	13.39	77.8533	2.5396	1.51751e-27	1.40743e-25	T	diguanylate cyclase	-	-
SMb20588	catJ	4.12	6.08	8.13	59.65	42.42	53.4	6.11	51.8233	3.0844	2.49195e-27	2.2772e-25	I	Coenzyme A transferase	-	ko:K01040
SMa2211		22.16	21.18	30.44	100.61	111.26	102.88	24.5933	104.917	2.0929	2.75803e-27	2.48383e-25	EH	Thiamine pyrophosphate enzyme, central domain	-	ko:K01652
SMc01586		382.32	411.01	347.28	1878.02	1290.19	1374.2	380.203	1514.14	1.9937	4.02696e-27	3.52444e-25	S	BA14K-like protein	-	-
SMc04351	macB	201.55	209.11	236.12	722.68	625.16	664.8	215.593	670.88	1.6377	5.50271e-27	4.74915e-25	V	Non-canonical ABC transporter that contains transmembrane domains (TMD), which form a pore in the inner membrane, and an ATP-binding domain (NBD), which is responsible for energy generation. Confers resistance against macrolides	-	ko:K05685,ko:K09810
SMa0833	msi338	215.08	271.53	212.11	12.37	22.25	27.97	232.907	20.8633	-3.4807	1.01415e-26	8.51614e-25	S	Evidence 4 Homologs of previously reported genes of	-	-
SMa2213		25.88	33.12	45.94	158.33	163.88	138.28	34.98	153.497	2.1336	1.17102e-26	9.70227e-25	C	Belongs to the aldehyde dehydrogenase family	-	ko:K00128
SMb21206	ybhF	14.9	14.87	18.72	98.68	77.42	71.39	16.1633	82.4967	2.3516	2.12812e-26	1.74002e-24	V	ABC transporter, ATP-binding protein	GO:0003674,GO:0005215,GO:0005575,GO:0005623,GO:0005886,GO:0006810,GO:0006855,GO:0008150,GO:0015562,GO:0015893,GO:0016020,GO:0022857,GO:0042221,GO:0042493,GO:0044464,GO:0050896,GO:0051179,GO:0051234,GO:0055085,GO:0071944	ko:K01990
SMa1128	degP4	502.32	404.02	409.1	202.59	236.2	201.06	438.48	213.283	-1.0397	5.35906e-26	4.32483e-24	O	Trypsin-like serine proteases, typically periplasmic, contain C-terminal PDZ domain	-	ko:K04772
SMa0841		24.51	35.15	27.6	2.2	1.39	5.28	29.0867	2.95667	-3.2983	7.75468e-26	6.09969e-24	L	Transposase	-	ko:K07497
SMc03799		49.41	57.46	82.05	295.78	293.46	212.8	62.9733	267.347	2.0859	8.27413e-26	6.42693e-24	S	Cobalamin synthesis protein cobW C-terminal domain	-	-
SMa1120		180.38	153.9	138.76	65.97	54.01	63.57	157.68	61.1833	-1.3658	1.26246e-25	9.6851e-24	V	ATPases associated with a variety of cellular activities	-	ko:K02003,ko:K05685
SMc03058		50.39	41.24	36.86	185	162.72	161.95	42.83	169.89	1.9879	1.30401e-25	9.88183e-24	M	Glycosyltransferase like family 2	-	ko:K16556
SMc02645	cfa	237.63	244.94	288.87	853.25	733.41	770.81	257.147	785.823	1.6116	2.10832e-25	1.57844e-23	M	cyclopropane-fatty-acyl-phospholipid synthase	GO:0003674,GO:0003824,GO:0005575,GO:0005622,GO:0005623,GO:0005737,GO:0005829,GO:0006629,GO:0008150,GO:0008152,GO:0008168,GO:0008757,GO:0008825,GO:0009987,GO:0016740,GO:0016741,GO:0030258,GO:0032259,GO:0044237,GO:0044238,GO:0044255,GO:0044424,GO:0044444,GO:0044464,GO:0071704	ko:K00574
SMc04244	znuC	91.76	95.32	131.96	379.89	392.43	318.03	106.347	363.45	1.773	3.4085e-25	2.49181e-23	P	Part of the ABC transporter complex ZnuABC involved in zinc import. Responsible for energy coupling to the transport system	-	ko:K09817
SMa0766	ccoO	896.8	797.01	779.64	359.28	301.34	405.26	824.483	355.293	-1.2145	4.72768e-25	3.41603e-23	C	cytochrome C oxidase mono-heme subunit FixO	-	ko:K00405
SMc00800		45.68	44.62	66.73	298.25	204.91	210.26	52.3433	237.807	2.1837	5.76972e-25	4.12104e-23	-	-	-	-
SMc01666	mdeA	77.05	72.11	76.94	311.45	233.19	286.34	75.3667	276.993	1.8779	6.90469e-25	4.87565e-23	E	methionine gamma-lyase	-	ko:K01739,ko:K01761
SMc01145		180.18	182.97	170.33	78.07	94.57	91.34	177.827	87.9933	-1.015	4.5235e-24	3.15832e-22	E	bleomycin resistance protein	-	-
SMc00886		483.89	451.79	459.2	1591.59	1276.75	1435.42	464.96	1434.59	1.6255	5.5522e-24	3.83349e-22	H	Trimethylamine methyltransferase (MTTB)	-	ko:K14083
SMc02428		246.45	255.08	237.26	69.27	121.23	107.77	246.263	99.4233	-1.3085	1.2754e-23	8.6145e-22	CE	Rieske [2Fe-2S] domain	-	-
SMb21208		28.23	22.31	29.11	148.44	111.03	97.79	26.55	119.087	2.1652	1.47704e-23	9.7642e-22	K	Domain of unknown function (DUF1956)	-	-
SMc01175		26.08	27.94	32.33	163.56	108.25	115.59	28.7833	129.133	2.1656	1.86907e-23	1.22257e-21	IQ	Belongs to the short-chain dehydrogenases reductases (SDR) family	-	-
SMc00141	MA20_43500	155.48	176.89	146.13	671.82	503	495.81	159.5	556.877	1.8038	6.21687e-23	4.02413e-21	M	Belongs to the ompA family	-	-
SMb21578	actP	83.72	72.78	91.12	263.89	248.72	237.83	82.54	250.147	1.5996	6.57975e-23	4.21511e-21	P	Cation transport ATPase	-	ko:K17686
SMb20432	eutB	67.05	62.19	71.27	255.92	201.2	217.49	66.8367	224.87	1.7504	7.77695e-23	4.93122e-21	E	threonine dehydratase	-	ko:K01754
SMc00277		230.57	207.53	196.23	782.6	608.7	764.55	211.443	718.617	1.765	8.99779e-23	5.64771e-21	E	Aminotransferase class-V	-	-
SMc04243	znuB	38.62	41.24	48.96	152.56	140.24	135.74	42.94	142.847	1.7341	1.59884e-22	9.93516e-21	P	ABC-type Mn2 Zn2 transport systems, permease components	GO:0000006,GO:0000041,GO:0003674,GO:0005215,GO:0005385,GO:0005575,GO:0005623,GO:0005886,GO:0006810,GO:0006811,GO:0006812,GO:0006829,GO:0008150,GO:0008324,GO:0010035,GO:0010038,GO:0010043,GO:0015075,GO:0015318,GO:0016020,GO:0022857,GO:0022890,GO:0030001,GO:0034220,GO:0042221,GO:0044464,GO:0046873,GO:0046915,GO:0050896,GO:0051179,GO:0051234,GO:0055085,GO:0070838,GO:0071577,GO:0071944,GO:0072509,GO:…	ko:K09816
SMc03125	oppD	71.96	71.21	76	22.82	31.76	32.47	73.0567	29.0167	-1.3321	2.14057e-22	1.30407e-20	P	Belongs to the ABC transporter superfamily	-	ko:K02031
SMc03824		34.31	34.03	34.78	110.5	117.52	113.64	34.3733	113.887	1.7282	2.26849e-22	1.36858e-20	K	helix_turn_helix multiple antibiotic resistance protein	-	-
SMc01266		66.07	69.63	86.58	338.93	228.55	286.54	74.0933	284.673	1.9419	2.58346e-22	1.54362e-20	S	Belongs to the UPF0229 family	-	ko:K09786
SMa1138	ompR	60	53.63	58.61	19.24	20.86	24.06	57.4133	21.3867	-1.4247	3.82073e-22	2.25368e-20	T	Transcriptional regulatory protein	-	ko:K02483
SMa2257		55.09	55.88	72.97	268.29	194.94	216.52	61.3133	226.583	1.8858	3.84439e-22	2.25368e-20	L	Belongs to the 'phage' integrase family	-	-
SMa1403		4.71	7.21	8.13	39.03	42.88	40.88	6.68333	40.93	2.6145	4.35879e-22	2.52365e-20	C	Aldo/keto reductase family	-	ko:K00064
SMc00129	feuQ	61.96	72.33	78.08	247.67	213.02	211.04	70.79	223.91	1.6613	4.38613e-22	2.52365e-20	T	Histidine kinase	-	-
SMb20429	ehuC	47.25	46.64	56.34	161.36	170.84	138.87	50.0767	157.023	1.6488	4.88053e-22	2.78235e-20	E	ABC transporter permease	-	ko:K02029
SMa2223		9.21	8.34	11.91	55.25	46.13	59.85	9.82	53.7433	2.4523	6.60615e-22	3.69825e-20	E	FAD dependent oxidoreductase	-	-
SMa1231		1194.03	969.16	967.74	455.49	450.15	560.94	1043.64	488.86	-1.0941	7.037e-22	3.90428e-20	T	Universal stress protein UspA and related nucleotide-binding proteins	-	-
SMa1761		40.39	36.73	38.75	134.97	128.42	116.18	38.6233	126.523	1.7119	8.22849e-22	4.52494e-20	E	Belongs to the class-III pyridoxal-phosphate-dependent aminotransferase family	-	-
SMc02705	MA20_44655	170.58	165.62	191.51	554.17	467.77	521.44	175.903	514.46	1.5483	9.1108e-22	4.96618e-20	S	Aerotolerance regulator N-terminal	-	-
SMc00252		21.17	21.63	19.66	151.19	84.14	92.71	20.82	109.347	2.3929	1.00205e-21	5.41453e-20	-	-	-	-
SMc01489		17.65	18.25	19.85	87.96	67.92	77.26	18.5833	77.7133	2.0642	2.46665e-21	1.29896e-19	DTZ	EF hand	-	-
SMb20032		30.78	29.97	33.84	115.45	143.72	90.95	31.53	116.707	1.8881	4.00616e-21	2.07452e-19	S	amine dehydrogenase activity	-	-
SMc01514		77.25	79.09	62.95	262.79	241.07	209.08	73.0967	237.647	1.7009	4.27544e-21	2.19567e-19	-	-	-	-
SMc02429		143.71	150.3	141.22	59.1	80.9	75.11	145.077	71.7033	-1.0167	4.38961e-21	2.23582e-19	K	LysR substrate binding domain	-	-
SMc02430		83.33	91.03	83.18	34.36	43.11	40.68	85.8467	39.3833	-1.1242	4.79034e-21	2.4201e-19	L	High confidence in function and specificity	-	ko:K07481
SMa1136		161.16	125.74	147.08	64.6	67.69	73.54	144.66	68.61	-1.0762	5.337e-21	2.65313e-19	-	-	-	-
SMa0806		114.31	137.23	112.86	51.4	55.86	61.02	121.467	56.0933	-1.1147	7.96439e-21	3.92783e-19	L	Transposase, IS3 IS911 family protein	-	ko:K07497
SMb20846	xdhB	55.49	45.97	62.58	164.66	176.17	165.86	54.68	168.897	1.6271	9.69186e-21	4.74214e-19	F	Xanthine dehydrogenase	-	ko:K13482
SMc03825		38.62	38.08	48.4	157.78	130.04	135.15	41.7	140.99	1.7575	1.90035e-20	9.15411e-19	EGP	Sugar (and other) transporter	-	ko:K07552
SMc02507	sitC	296.06	317.72	348.42	906.85	804.34	848.26	320.733	853.15	1.4114	2.40284e-20	1.14856e-18	P	ABC-type Mn2 Zn2 transport systems, permease components	-	ko:K11605
SMa2221		3.53	4.73	4.92	31.89	29.21	33.05	4.39333	31.3833	2.8366	3.06511e-20	1.44293e-18	E	flavin adenine dinucleotide binding	-	-
SMc02367	ragB	59.6	59.94	65.41	197.37	175.01	173.29	61.65	181.89	1.5609	3.71898e-20	1.72461e-18	T	Histidine kinase	-	-
SMb20772	pdxA_2	39.02	41.91	61.63	191.87	167.13	153.14	47.52	170.713	1.845	3.88997e-20	1.77832e-18	H	Pyridoxal phosphate biosynthetic protein PdxA	-	ko:K00097
SMc03126	MA20_13260	61.17	75.94	65.6	17.87	29.9	27.97	67.57	25.2467	-1.4203	4.23242e-20	1.91972e-18	P	Belongs to the ABC transporter superfamily	-	ko:K02032
SMc01725		65.29	59.71	70.7	211.11	191.47	175.05	65.2333	192.543	1.5615	5.21561e-20	2.33164e-18	S	Anti-sigma-K factor rskA	-	-
SMc01488		44.7	55.88	57.85	208.64	170.14	153.54	52.81	177.44	1.7484	5.45271e-20	2.42022e-18	S	Protein of unknown function (DUF983)	-	-
SMa1213	ccoP	850.13	618.54	703.07	288.36	401.94	371.03	723.913	353.777	-1.033	5.85393e-20	2.56171e-18	C	C-type cytochrome. Part of the cbb3-type cytochrome c oxidase complex	-	ko:K00406
SMc02421		108.82	114.24	111.92	37.11	54.7	56.72	111.66	49.51	-1.1733	5.92748e-20	2.57576e-18	F	Amidohydrolase family	-	-
SMb21135		38.82	25.46	36.68	167.41	112.42	166.64	33.6533	148.823	2.1448	5.98752e-20	2.58378e-18	ET	belongs to the bacterial solute-binding protein 3 family	-	ko:K02030
SMc03959	ligD	72.74	71.21	82.8	279.28	208.39	247.81	75.5833	245.16	1.6976	7.65211e-20	3.25686e-18	L	DNA ligase	-	ko:K01971
SMc03127	MA20_13265	49.21	44.62	46.88	11.27	21.09	16.23	46.9033	16.1967	-1.534	8.10289e-20	3.42526e-18	P	Binding-protein-dependent transport system inner membrane component	-	ko:K02033
SMc00818	oxyR	147.64	159.31	182.24	709.48	457.11	527.69	163.063	564.76	1.7922	1.10309e-19	4.60041e-18	K	Transcriptional regulator	-	ko:K04761
SMc01267	prkA	457.61	486.95	533.31	1881.04	1270.49	1619.66	492.623	1590.4	1.6908	1.14658e-19	4.74991e-18	T	Serine protein kinase	GO:0003674,GO:0003824,GO:0004672,GO:0006464,GO:0006468,GO:0006793,GO:0006796,GO:0006807,GO:0006950,GO:0006995,GO:0007154,GO:0008150,GO:0008152,GO:0009267,GO:0009605,GO:0009987,GO:0009991,GO:0016301,GO:0016310,GO:0016740,GO:0016772,GO:0016773,GO:0019538,GO:0031667,GO:0031668,GO:0031669,GO:0033554,GO:0036211,GO:0042594,GO:0043170,GO:0043412,GO:0043562,GO:0044237,GO:0044238,GO:0044260,GO:0044267,GO:…	ko:K07180
SMa0687		77.05	63.77	69.76	33.26	27.35	29.73	70.1933	30.1133	-1.2209	1.18163e-19	4.86268e-18	-	-	-	-
SMc02874	murQ	112.74	88.56	109.27	297.15	299.02	344.62	103.523	313.597	1.599	2.22587e-19	8.98154e-18	S	Specifically catalyzes the cleavage of the D-lactyl ether substituent of MurNAc 6-phosphate, producing GlcNAc 6- phosphate and D-lactate. Together with AnmK, is also required for the utilization of anhydro-N-acetylmuramic acid (anhMurNAc) either imported from the medium or derived from its own cell wall murein, and thus plays a role in cell wall recycling	-	ko:K07106
SMc04246		317.03	310.51	267.13	1211.42	920.01	798.58	298.223	976.67	1.7115	2.289e-19	9.17667e-18	S	Nickel/cobalt transporter regulator	-	-
SMc01982	coxM	53.33	62.64	89.23	232	228.79	222.97	68.4	227.92	1.7365	2.53382e-19	1.00931e-17	C	cytochrome C oxidase	GO:0005575,GO:0005623,GO:0005886,GO:0005887,GO:0006091,GO:0006119,GO:0006139,GO:0006163,GO:0006725,GO:0006753,GO:0006793,GO:0006796,GO:0006807,GO:0008150,GO:0008152,GO:0009117,GO:0009123,GO:0009126,GO:0009141,GO:0009144,GO:0009150,GO:0009161,GO:0009167,GO:0009199,GO:0009205,GO:0009259,GO:0009319,GO:0009987,GO:0015980,GO:0016020,GO:0016021,GO:0016310,GO:0017144,GO:0019637,GO:0019693,GO:0022900,GO:…	ko:K02275
SMc02424		86.86	91.49	94.34	35.46	46.59	47.33	90.8967	43.1267	-1.0756	2.59601e-19	1.02749e-17	P	Belongs to the ABC transporter superfamily	-	ko:K02032
SMc02118	aapJ	545.25	531.34	577.73	1341.99	1330.52	1228.88	551.44	1300.46	1.2377	2.81229e-19	1.10605e-17	ET	ABC-type amino acid transport signal transduction systems, periplasmic component domain	GO:0005575,GO:0005623,GO:0042597,GO:0044464	ko:K09969
SMa0612		65.68	67.83	81.1	213.59	202.36	191.09	71.5367	202.347	1.5001	2.83952e-19	1.10974e-17	C	Belongs to the heme-copper respiratory oxidase family	-	ko:K00404
SMc00722		461.73	492.8	535.76	1413.46	1203.96	1316.69	496.763	1311.37	1.4004	3.64923e-19	1.41727e-17	E	Domain of unknown function (DUF4175)	-	-
SMc00817	dlhH	49.21	50.25	54.26	183.9	144.64	153.54	51.24	160.693	1.649	8.79517e-19	3.29236e-17	Q	dienelactone hydrolase	-	ko:K01061
SMb20928		18.23	23.43	19.09	98.96	68.61	83.91	20.25	83.8267	2.0495	9.94809e-19	3.70164e-17	M	Tricorn protease homolog	-	ko:K03797,ko:K08676
SMc01705		69.01	59.49	66.36	204.79	177.79	196.37	64.9533	192.983	1.571	1.1327e-18	4.18964e-17	S	Aminoacyl-tRNA editing domain	-	ko:K19055
SMc01463		7.45	9.01	11.15	58.28	39.64	46.55	9.20333	48.1567	2.3875	1.36547e-18	5.02071e-17	S	Phosphoribosyl transferase domain	-	ko:K07100
SMa1174		81.95	67.83	72.22	21.99	27.58	35.99	74	28.52	-1.3756	1.40087e-18	5.12058e-17	L	Integrase core domain	-	ko:K00986
SMc03112	metH	838.17	705.97	929.55	1926.4	2404.91	2241.04	824.563	2190.78	1.4097	1.48886e-18	5.41041e-17	E	Methionine synthase	GO:0000096,GO:0000097,GO:0003674,GO:0003824,GO:0005488,GO:0005575,GO:0005622,GO:0005623,GO:0005737,GO:0005829,GO:0006082,GO:0006464,GO:0006479,GO:0006520,GO:0006555,GO:0006575,GO:0006725,GO:0006730,GO:0006732,GO:0006760,GO:0006790,GO:0006807,GO:0008144,GO:0008150,GO:0008152,GO:0008168,GO:0008172,GO:0008213,GO:0008270,GO:0008276,GO:0008652,GO:0008705,GO:0009058,GO:0009066,GO:0009067,GO:0009086,GO:…	ko:K00548
SMc00769		33.13	45.74	50.29	195.17	136.53	149.04	43.0533	160.247	1.8961	1.90438e-18	6.88014e-17	K	transcriptional	-	ko:K07110
SMc02177		35.68	35.38	35.35	120.67	107.09	103.66	35.47	110.473	1.639	2.55552e-18	9.17919e-17	S	FecR protein	-	-
SMa1545		10.98	11.49	10.21	62.95	44.27	46.55	10.8933	51.2567	2.2343	4.61103e-18	1.60972e-16	C	Belongs to the complex I subunit 6 family	-	ko:K00339
SMc04245	znuA	127.83	129.79	193.02	466.48	647.65	400.17	150.213	504.767	1.7486	4.74885e-18	1.64857e-16	P	ABC-type Zn2 transport system, periplasmic component surface adhesin	-	ko:K09815
SMa0661		72.35	68.5	64.09	28.86	25.96	33.84	68.3133	29.5533	-1.2088	6.41495e-18	2.19025e-16	-	-	-	-
SMc01265		63.52	74.81	85.07	296.88	201.43	268.74	74.4667	255.683	1.7797	6.79062e-18	2.30584e-16	S	SpoVR family	GO:0006950,GO:0006974,GO:0008150,GO:0009987,GO:0033554,GO:0050896,GO:0051716	ko:K06415
SMb21184	ackA	19.41	13.52	22.12	76.69	65.83	80	18.35	74.1733	2.0151	7.82457e-18	2.62821e-16	C	Catalyzes the formation of acetyl phosphate from acetate and ATP. Can also catalyze the reverse reaction	-	ko:K00925
SMa0689		104.5	76.61	88.29	44.81	42.42	40.29	89.8	42.5067	-1.079	8.24072e-18	2.75311e-16	N	Protein of unknown function (DUF2950)	-	-
SMa1259		111.95	85.18	91.12	42.06	50.76	46.55	96.0833	46.4567	-1.0484	1.06829e-17	3.54992e-16	O	Belongs to the heme-copper respiratory oxidase family	-	-
SMc01583	yliI	51.96	55.43	63.52	180.33	162.95	146.69	56.97	163.323	1.5195	1.35504e-17	4.47883e-16	G	Glucose sorbosone	GO:0003674,GO:0003824,GO:0005488,GO:0005509,GO:0005575,GO:0005623,GO:0008150,GO:0008152,GO:0016491,GO:0016614,GO:0016901,GO:0019842,GO:0030288,GO:0030313,GO:0031406,GO:0031975,GO:0036094,GO:0042597,GO:0043167,GO:0043168,GO:0043169,GO:0043177,GO:0044464,GO:0046872,GO:0048037,GO:0048038,GO:0055114,GO:0070968,GO:0097159,GO:1901363	ko:K00117,ko:K21430
SMa0773		747.79	699.21	623.1	383.47	279.55	368.29	690.033	343.77	-1.0052	1.60938e-17	5.29137e-16	L	DNA restriction-modification system	-	-
SMc02420		96.86	99.6	103.41	30.79	57.95	45.77	99.9567	44.8367	-1.1566	2.20539e-17	7.10066e-16	F	Cytosine deaminase and related metal-dependent	-	ko:K01485
SMb20331		81.17	89.68	79.59	379.34	234.58	261.89	83.48	291.937	1.8062	2.46712e-17	7.90241e-16	S	SPW repeat	-	-
SMc01456		60.78	63.32	58.79	197.92	162.49	173.68	60.9633	178.03	1.5461	2.55141e-17	8.13048e-16	S	Domain of unknown function (DUF1772)	-	-
SMc02508	sitB	437.42	494.16	523.67	1347.49	1144.85	1332.54	485.083	1274.96	1.3941	2.78547e-17	8.83109e-16	P	ABC-type Mn Zn transport systems, ATPase component	-	ko:K11607
SMc02227	fadJ	164.5	183.87	167.88	393.64	518.07	414.25	172.083	441.987	1.3609	3.50975e-17	1.10709e-15	I	3-hydroxyacyl-CoA dehydrogenase	-	ko:K01782
SMc01904	clpX	1124.23	1125.99	1212.18	3040.79	2657.57	2607.57	1154.13	2768.64	1.2624	4.69938e-17	1.45461e-15	O	ATP-dependent specificity component of the Clp protease. It directs the protease to specific substrates. Can perform chaperone functions in the absence of ClpP	GO:0000166,GO:0003674,GO:0003824,GO:0004176,GO:0005488,GO:0005524,GO:0006508,GO:0006807,GO:0008144,GO:0008150,GO:0008152,GO:0008233,GO:0009056,GO:0009057,GO:0009987,GO:0016462,GO:0016787,GO:0016817,GO:0016818,GO:0016887,GO:0017076,GO:0017111,GO:0019538,GO:0030163,GO:0030554,GO:0032553,GO:0032555,GO:0032559,GO:0035639,GO:0036094,GO:0042623,GO:0043167,GO:0043168,GO:0043170,GO:0044238,GO:0051301,GO:…	ko:K03544
SMa2253		21.96	25.01	27.22	87.69	77.19	79.41	24.73	81.43	1.7193	5.18179e-17	1.57841e-15	S	PIN domain	-	-
SMc02443	grxC	228.02	228.26	220.43	614.65	535.22	602.8	225.57	584.223	1.3729	5.37351e-17	1.62092e-15	O	Has a glutathione-disulfide oxidoreductase activity in the presence of NADPH and glutathione reductase. Reduces low molecular weight disulfides and proteins	GO:0003674,GO:0003824,GO:0005488,GO:0005575,GO:0005622,GO:0005623,GO:0005737,GO:0005829,GO:0008150,GO:0008152,GO:0015035,GO:0015036,GO:0016491,GO:0016667,GO:0033218,GO:0042277,GO:0043167,GO:0043168,GO:0043295,GO:0044424,GO:0044444,GO:0044464,GO:0048037,GO:0055114,GO:0072341,GO:1900750,GO:1901681	ko:K03676
SMc03744	MA20_05375	258.61	245.61	287.92	760.06	625.39	698.25	264.047	694.567	1.3953	5.40795e-17	1.62343e-15	S	protein conserved in bacteria	-	ko:K09806
SMc02506	sitD	249.59	259.36	304.18	748.24	646.25	743.62	271.043	712.703	1.3948	5.43602e-17	1.62401e-15	P	ABC-type Mn2 Zn2 transport systems, permease components	-	ko:K02075,ko:K11606,ko:K11708,ko:K11709
SMc02416		65.29	70.08	64.47	17.04	27.58	32.86	66.6133	25.8267	-1.3669	8.31177e-17	2.42485e-15	F	Amidohydrolase family	-	-
SMb21456		57.05	51.6	51.99	301.28	154.15	196.96	53.5467	217.463	2.0219	8.42149e-17	2.44538e-15	S	Evidence 4 Homologs of previously reported genes of	-	-
SMa0824		45.49	43.49	42.91	18.69	18.31	19.36	43.9633	18.7867	-1.2266	9.51707e-17	2.73792e-15	K	bacterial-type RNA polymerase transcriptional activator activity, sequence-specific DNA binding	-	-
SMc00080	ydfF	73.52	79.99	82.43	214.69	216.5	180.33	78.6467	203.84	1.374	1.08779e-16	3.10071e-15	K	transcriptional regulator	GO:0003674,GO:0003676,GO:0003677,GO:0003700,GO:0005488,GO:0006355,GO:0008150,GO:0009889,GO:0010035,GO:0010038,GO:0010288,GO:0010468,GO:0010556,GO:0019219,GO:0019222,GO:0031323,GO:0031326,GO:0032791,GO:0042221,GO:0043167,GO:0043169,GO:0046686,GO:0046870,GO:0046872,GO:0046914,GO:0050789,GO:0050794,GO:0050896,GO:0051171,GO:0051252,GO:0060255,GO:0065007,GO:0080090,GO:0097063,GO:0097159,GO:0140110,GO:…	-
SMa1195	ytfE	53.92	36.73	45.94	17.59	16.46	18.58	45.53	17.5433	-1.3759	1.5865e-16	4.44078e-15	D	Di-iron-containing protein involved in the repair of iron-sulfur clusters	-	ko:K07322
SMa1450	atoB	11.37	16	13.42	52.23	52.62	51.05	13.5967	51.9667	1.9343	1.6919e-16	4.71455e-15	I	Belongs to the thiolase family	-	ko:K00626
SMc03922	glgB	201.95	206.41	237.82	487.65	528.73	491.12	215.393	502.5	1.2221	2.03416e-16	5.59305e-15	G	Catalyzes the formation of the alpha-1,6-glucosidic linkages in glycogen by scission of a 1,4-alpha-linked oligosaccharide from growing alpha-1,4-glucan chains and the subsequent attachment of the oligosaccharide to the alpha-1,6 position	-	ko:K00700
SMc02509	sitA	1479.69	1606.18	1616.37	4185.96	3534.23	4171.1	1567.41	3963.76	1.3385	2.20594e-16	6.01216e-15	P	Belongs to the bacterial solute-binding protein 9 family	-	ko:K02077,ko:K09815,ko:K11604
SMa6007		21.57	24.79	24.77	99.78	72.78	77.26	23.71	83.2733	1.8124	2.61109e-16	7.05449e-15	#N/A	#N/A	#N/A	#N/A
SMc02878	nagA	63.52	66.7	77.7	175.1	186.13	179.94	69.3067	180.39	1.3801	2.8053e-16	7.51385e-15	G	Belongs to the metallo-dependent hydrolases superfamily. NagA family	GO:0003674,GO:0003824,GO:0005488,GO:0006040,GO:0006044,GO:0006046,GO:0006054,GO:0006082,GO:0008150,GO:0008152,GO:0008270,GO:0008448,GO:0009056,GO:0009987,GO:0016043,GO:0016054,GO:0016787,GO:0016810,GO:0016811,GO:0016999,GO:0017001,GO:0017144,GO:0019213,GO:0019262,GO:0019752,GO:0022607,GO:0042737,GO:0043167,GO:0043169,GO:0043436,GO:0043933,GO:0044085,GO:0044237,GO:0044248,GO:0044281,GO:0044282,GO:…	ko:K01443
SMc00397		98.03	91.03	111.73	279.83	247.33	279.49	100.263	268.883	1.4232	3.44097e-16	9.09881e-15	M	FR47-like protein	-	-
SMa0025		36.86	27.94	38.94	109.13	102.92	115.98	34.58	109.343	1.6609	3.52054e-16	9.26976e-15	E	Transglutaminase/protease-like homologues	-	-
SMc01515		74.31	75.49	63.14	212.76	202.13	175.25	70.98	196.713	1.4706	3.58394e-16	9.39688e-15	M	Gram-negative bacterial TonB protein C-terminal	-	ko:K03832
SMb20375	MA20_28005	12.35	15.77	16.64	68.45	49.6	60.24	14.92	59.43	1.9939	4.27901e-16	1.11722e-14	K	FCD	-	ko:K05799
SMa1529	nuoD2	8.43	6.99	9.26	45.08	34.31	36.38	8.22667	38.59	2.2298	6.26161e-16	1.61451e-14	C	NDH-1 shuttles electrons from NADH, via FMN and iron- sulfur (Fe-S) centers, to quinones in the respiratory chain. The immediate electron acceptor for the enzyme in this species is believed to be ubiquinone. Couples the redox reaction to proton translocation (for every two electrons transferred, four hydrogen ions are translocated across the cytoplasmic membrane), and thus conserves the redox ene…	-	ko:K00333
SMc02262	aruH	39.02	47.09	53.5	129.47	134.44	128.5	46.5367	130.803	1.491	6.6543e-16	1.70164e-14	E	Cys/Met metabolism PLP-dependent enzyme	-	ko:K00812,ko:K12252
SMc03211	hppD	373.11	414.16	483.21	1141.88	989.55	1107.22	423.493	1079.55	1.35	7.71733e-16	1.95737e-14	E	4-hydroxyphenylpyruvate dioxygenase	GO:0001897,GO:0001906,GO:0001907,GO:0003674,GO:0003824,GO:0003868,GO:0006082,GO:0006520,GO:0006570,GO:0006572,GO:0006725,GO:0006807,GO:0008150,GO:0008152,GO:0009056,GO:0009063,GO:0009072,GO:0009074,GO:0009987,GO:0016054,GO:0016491,GO:0016701,GO:0016702,GO:0019439,GO:0019752,GO:0019835,GO:0019836,GO:0031640,GO:0035821,GO:0043436,GO:0044003,GO:0044004,GO:0044179,GO:0044237,GO:0044238,GO:0044248,GO:…	ko:K00457
SMa1760		32.15	32.67	36.68	115.73	92.95	103.66	33.8333	104.113	1.6216	7.77192e-16	1.9632e-14	S	Phosphotransferase enzyme family	-	-
SMa0520		78.43	63.54	64.65	212.21	192.62	175.25	68.8733	193.36	1.4893	8.21411e-16	2.0665e-14	K	Helix-turn-helix domain, rpiR family	-	-
SMc01159		23.92	22.76	34.6	99.23	96.43	76.87	27.0933	90.8433	1.7454	8.97821e-16	2.24059e-14	O	Thioredoxin reductase	-	-
SMb20433	eutC	55.49	52.73	66.73	203.42	151.36	172.12	58.3167	175.633	1.5906	9.82362e-16	2.44176e-14	E	ornithine cyclodeaminase	-	ko:K01750
SMc01821	dht	43.33	52.05	69.76	161.36	171.53	154.91	55.0467	162.6	1.5626	9.95955e-16	2.44698e-14	F	Dihydroorotase and related cyclic amidohydrolases	-	ko:K01464
SMc02423		59.8	64.45	68.25	25.29	37.78	31.49	64.1667	31.52	-1.0256	9.96276e-16	2.44698e-14	P	Belongs to the ABC transporter superfamily	-	ko:K02031
SMc02263	ilvB1	39.41	43.49	46.88	138.27	114.74	124.78	43.26	125.93	1.5415	1.0205e-15	2.49661e-14	EH	Thiamine pyrophosphate enzyme, central domain	-	ko:K01652
SMc01628		50.19	62.64	98.87	258.94	275.84	201.26	70.5667	245.347	1.7978	1.10401e-15	2.67982e-14	G	Bacterial extracellular solute-binding protein	-	ko:K02027
SMc00809		12.74	12.62	11.34	66.25	44.51	46.16	12.2333	52.3067	2.0962	1.2394e-15	2.97361e-14	-	-	-	-
SMc02875		28.63	22.31	28.92	88.51	79.51	87.62	26.62	85.2133	1.6786	1.34827e-15	3.22236e-14	G	N-acetylglucosamine kinase	-	ko:K18676
SMb20761	phnI	4.9	4.06	6.05	32.99	25.03	27.77	5.00333	28.5967	2.5149	1.917e-15	4.54666e-14	P	Phosphonate	GO:0003674,GO:0003824,GO:0005575,GO:0006793,GO:0008150,GO:0008152,GO:0009056,GO:0009987,GO:0016740,GO:0016772,GO:0016780,GO:0019634,GO:0019637,GO:0019700,GO:0032991,GO:0044237,GO:0046434,GO:0061693,GO:0061694,GO:0061695,GO:0071704,GO:1901575,GO:1902494,GO:1904176,GO:1990234	ko:K06164
SMc02442	MA20_39720	448.4	479.06	516.1	1232.31	1068.13	1185.46	481.187	1161.97	1.2719	2.27866e-15	5.38386e-14	S	Nitrilase cyanide hydratase and apolipoprotein	-	ko:K11206
SMa0662	fixK	27.84	26.36	27.03	9.62	7.65	10.17	27.0767	9.14667	-1.5657	2.30896e-15	5.43479e-14	K	Transcriptional regulator	-	ko:K01420,ko:K15861
SMa0678	potE	67.25	59.94	65.22	38.21	28.05	26.21	64.1367	30.8233	-1.0571	5.45139e-15	1.25929e-13	E	Amino acid permease	-	ko:K03756,ko:K03759
SMc03970		52.35	54.31	48.02	180.87	130.73	157.45	51.56	156.35	1.6005	7.45347e-15	1.69655e-13	S	Zn-dependent hydrolases of the beta-lactamase fold	-	-
SMa1602		24.9	25.46	32.89	84.39	82.75	83.52	27.75	83.5533	1.5902	7.53012e-15	1.70774e-13	K	LysR substrate binding domain	-	-
SMc02366	ragA	53.33	52.28	70.14	160.26	160.4	148.06	58.5833	156.24	1.4152	9.61141e-15	2.17183e-13	T	Response regulators consisting of a CheY-like receiver domain and a winged-helix DNA-binding domain	GO:0000160,GO:0003674,GO:0003676,GO:0003677,GO:0005488,GO:0005515,GO:0006355,GO:0007154,GO:0007165,GO:0008150,GO:0009889,GO:0009893,GO:0009987,GO:0010035,GO:0010038,GO:0010468,GO:0010556,GO:0010604,GO:0010628,GO:0019219,GO:0019222,GO:0023052,GO:0031323,GO:0031326,GO:0035556,GO:0042221,GO:0042802,GO:0046688,GO:0048518,GO:0050789,GO:0050794,GO:0050896,GO:0051171,GO:0051252,GO:0051716,GO:0060255,GO:…	ko:K02483
SMa0670		66.47	52.28	55.01	26.39	28.05	29.53	57.92	27.99	-1.0492	1.338e-14	3.01244e-13	S	Polyphosphate kinase 2 (PPK2)	-	ko:K22468
SMc03780	rsfS	1130.11	1203.96	1212.56	3257.95	2615.38	2695	1182.21	2856.11	1.2726	1.36288e-14	3.05737e-13	J	Functions as a ribosomal silencing factor. Interacts with ribosomal protein L14 (rplN), blocking formation of intersubunit bridge B8. Prevents association of the 30S and 50S ribosomal subunits and the formation of functional ribosomes, thus repressing translation	-	ko:K09710
SMc00198		9.21	10.14	10.78	61.3	35.93	40.88	10.0433	46.0367	2.1965	1.42801e-14	3.19196e-13	#N/A	#N/A	#N/A	#N/A
SMb20431	eutA	50.19	44.39	57.66	172.63	132.13	139.65	50.7467	148.137	1.5455	1.45298e-14	3.23614e-13	Q	Asp Glu hydantoin racemase	-	ko:K01799
SMa0675		38.23	33.57	32.14	13.74	15.53	14.08	34.6467	14.45	-1.2616	1.46811e-14	3.25816e-13	P	Sodium/calcium exchanger protein	-	ko:K07300
SMc03137		18.82	17.8	18.15	59.1	61.89	54.18	18.2567	58.39	1.6773	1.63522e-14	3.60327e-13	S	PIN domain	-	-
SMc00562		5.29	9.01	11.72	51.13	37.09	36.57	8.67333	41.5967	2.2618	2.73051e-14	5.81074e-13	K	helix_turn_helix multiple antibiotic resistance protein	-	ko:K06075
SMb20896	gbpR	12.16	16.45	24.58	70.1	71.86	56.52	17.73	66.16	1.8998	3.55429e-14	7.51237e-13	K	Transcriptional regulator	-	ko:K02623
SMc02418		65.09	63.77	69.76	23.09	42.88	29.53	66.2067	31.8333	-1.0564	3.67913e-14	7.70041e-13	P	Binding-protein-dependent transport system inner membrane component	-	ko:K02033
SMc04315		38.04	49.57	44.99	126.17	120.54	114.03	44.2	120.247	1.4439	3.68043e-14	7.70041e-13	K	LysR substrate binding domain	-	-
SMc04459	ftsH	2907.04	2922.13	3209.86	7032.41	6351.51	6928.49	3013.01	6770.8	1.1681	3.948e-14	8.2325e-13	O	Acts as a processive, ATP-dependent zinc metallopeptidase for both cytoplasmic and membrane proteins. Plays a role in the quality control of integral membrane proteins	-	ko:K03798
SMc02229	MA20_19860	397.42	401.32	354.47	851.6	918.39	982.83	384.403	917.607	1.2553	5.74132e-14	1.18922e-12	I	acyl-CoA dehydrogenase	-	ko:K00249
SMb20369		49.8	44.39	53.5	129.2	126.1	131.43	49.23	128.91	1.3888	5.96848e-14	1.23216e-12	M	MacB-like periplasmic core domain	-	ko:K09808
SMc01645		174.5	164.94	196.8	456.04	398.69	439.09	178.747	431.273	1.2707	6.29599e-14	1.29547e-12	P	Belongs to the ABC transporter superfamily	-	ko:K02031,ko:K02032
SMc03128	MA20_13270	40	42.59	43.86	12.09	21.09	20.54	42.15	17.9067	-1.235	6.41441e-14	1.31116e-12	P	Binding-protein-dependent transport system inner membrane component	-	ko:K02034
SMc02888		87.44	67.37	68.81	212.76	205.61	179.94	74.54	199.437	1.4198	6.65941e-14	1.35677e-12	K	helix_turn_helix, arabinose operon control protein	-	-
SMc04023	galU	180.57	184.77	184.13	533.28	416.54	428.53	183.157	459.45	1.3268	6.90478e-14	1.40217e-12	M	UTP-glucose-1-phosphate uridylyltransferase	-	ko:K00963
SMa1452		19.61	18.48	17.2	87.96	57.02	58.87	18.43	67.95	1.8824	7.33279e-14	1.48042e-12	IQ	Belongs to the short-chain dehydrogenases reductases (SDR) family	-	-
SMc02844		20.19	17.13	23.63	93.74	57.95	72.95	20.3167	74.88	1.8819	7.52787e-14	1.51386e-12	K	Bacterial regulatory proteins, tetR family	-	-
SMc03096	tamB	582.31	520.52	649.76	1360.14	1296.91	1427.2	584.197	1361.42	1.2206	8.43924e-14	1.69166e-12	S	protein conserved in bacteria	-	ko:K09800
SMc00519	MA20_09420	67.84	65.8	88.29	195.44	186.13	188.35	73.9767	189.973	1.3607	8.62348e-14	1.71751e-12	H	MobA-like NTP transferase domain	-	ko:K07141
SMc01510	hmuV	33.33	27.04	24.77	90.99	90.4	76.08	28.38	85.8233	1.5965	8.95789e-14	1.77841e-12	P	Part of the ABC transporter complex HmuTUV involved in hemin import. Responsible for energy coupling to the transport system	-	ko:K02013
SMc01549	MA20_08580	29.8	26.59	29.87	111.05	75.33	91.34	28.7533	92.5733	1.6869	1.12468e-13	2.20466e-12	-	-	-	-
SMc02419		62.35	57.01	62.39	14.02	32.22	28.75	60.5833	24.9967	-1.2772	1.13232e-13	2.21265e-12	P	ABC transporter permease	-	ko:K02034
SMc02414		68.03	75.04	69.19	24.74	46.82	31.49	70.7533	34.35	-1.0425	1.20254e-13	2.33518e-12	F	Cytosine deaminase and related metal-dependent hydrolases	-	-
SMc02876		12.16	14.87	20.04	49.48	57.25	55.55	15.69	54.0933	1.7856	1.58629e-13	3.06124e-12	K	transcriptional	-	ko:K03710
SMc04460	glgP	526.04	483.34	532.93	1048.14	1150.42	1087.27	514.103	1095.28	1.0912	1.65525e-13	3.17461e-12	G	Phosphorylase is an important allosteric enzyme in carbohydrate metabolism. Enzymes from different sources differ in their regulatory mechanisms and in their natural substrates. However, all known phosphorylases share catalytic and structural properties	GO:0000272,GO:0003674,GO:0003824,GO:0004645,GO:0005488,GO:0005575,GO:0005622,GO:0005623,GO:0005737,GO:0005975,GO:0005976,GO:0005977,GO:0005980,GO:0006073,GO:0006091,GO:0006112,GO:0008144,GO:0008150,GO:0008152,GO:0008184,GO:0009056,GO:0009057,GO:0009251,GO:0009987,GO:0015980,GO:0016052,GO:0016740,GO:0016757,GO:0016758,GO:0019842,GO:0030170,GO:0036094,GO:0043167,GO:0043168,GO:0043170,GO:0044042,GO:…	ko:K00688
SMb20039	norG	28.23	32.45	42.91	120.13	98.28	94.66	34.53	104.357	1.5956	1.81484e-13	3.46998e-12	K	COG1167 Transcriptional regulators containing a DNA-binding HTH domain and an aminotransferase domain (MocR family) and their eukaryotic orthologs	-	-
SMc04397	ALDH2C	28.43	29.52	27.98	78.34	83.68	75.11	28.6433	79.0433	1.4644	2.21902e-13	4.21681e-12	C	belongs to the aldehyde dehydrogenase family	GO:0001523,GO:0001654,GO:0001758,GO:0002138,GO:0003674,GO:0003824,GO:0004029,GO:0004030,GO:0005488,GO:0005515,GO:0005575,GO:0005622,GO:0005623,GO:0005634,GO:0005737,GO:0005829,GO:0005886,GO:0006081,GO:0006082,GO:0006629,GO:0006720,GO:0006721,GO:0006725,GO:0007275,GO:0007423,GO:0008150,GO:0008152,GO:0008299,GO:0008610,GO:0009058,GO:0009653,GO:0009698,GO:0009699,GO:0009790,GO:0009887,GO:0009987,GO:…	ko:K00128,ko:K00130
SMc04025		96.46	103.43	116.08	249.32	243.62	243.51	105.323	245.483	1.2208	2.60356e-13	4.91749e-12	S	protein conserved in bacteria	-	ko:K09795
SMc00065		16.27	16	15.5	55.25	54.01	45.57	15.9233	51.61	1.6965	2.66802e-13	5.02397e-12	-	-	-	-
SMa1960		18.43	21.41	29.3	78.62	70.7	68.26	23.0467	72.5267	1.654	3.11134e-13	5.82921e-12	K	HxlR-like helix-turn-helix	-	-
SMc02386	amn	219.4	209.33	227.24	525.03	474.49	475.67	218.657	491.73	1.1692	3.11442e-13	5.82921e-12	F	Catalyzes the hydrolysis of the N-glycosidic bond of AMP to form adenine and ribose 5-phosphate. Involved in regulation of AMP concentrations	GO:0003674,GO:0003824,GO:0005575,GO:0005622,GO:0005623,GO:0005737,GO:0005829,GO:0008714,GO:0016787,GO:0016798,GO:0016799,GO:0044424,GO:0044444,GO:0044464	ko:K01241
SMc03985	cyaF	81.76	86.98	102.09	198.47	230.87	211.04	90.2767	213.46	1.2415	3.59455e-13	6.64778e-12	T	Adenylate cyclase	-	ko:K01768
SMc04004	MA20_05980	54.51	53.4	52.56	141.02	136.99	121.85	53.49	133.287	1.3172	3.98829e-13	7.31307e-12	S	FOG TPR repeat	-	-
SMc01227	nemA	143.71	170.8	158.99	420.03	350.48	386.09	157.833	385.533	1.2885	3.98959e-13	7.31307e-12	C	NADH flavin oxidoreductases, Old Yellow Enzyme family	GO:0005575,GO:0005622,GO:0005623,GO:0008150,GO:0008152,GO:0044464,GO:0055114	ko:K10680
SMc01817		34.7	35.83	40.27	106.93	92.95	100.92	36.9333	100.267	1.4408	4.34512e-13	7.91805e-12	K	Transcriptional regulator	-	-
SMc03280		16.08	21.18	16.83	56.08	56.1	61.22	18.03	57.8	1.6807	4.40294e-13	7.99452e-12	S	PFAM transposase IS66	-	ko:K07484
SMc02520	glpD	71.37	63.54	104.35	209.46	299.25	199.5	79.7533	236.07	1.5656	4.43663e-13	8.01432e-12	C	Belongs to the FAD-dependent glycerol-3-phosphate dehydrogenase family	-	ko:K00111,ko:K21054
SMa6537		12.55	16.67	15.69	56.9	49.14	45.18	14.97	50.4067	1.7515	5.26115e-13	9.36755e-12	D	Antitoxin component of a toxin-antitoxin (TA) module	-	-
SMc00458	feuP	71.96	73.01	81.67	211.66	169.68	204.98	75.5467	195.44	1.3713	7.50206e-13	1.30217e-11	T	Response regulators consisting of a CheY-like receiver domain and a winged-helix DNA-binding domain	-	ko:K02483
SMa2297		23.92	23.43	17.96	95.11	64.44	66.11	21.77	75.22	1.7888	8.37629e-13	1.44184e-11	T	protein with a bacterial SH3 domain	-	-
SMa1979		16.08	16.22	20.61	54.7	67.69	47.14	17.6367	56.51	1.6799	9.18256e-13	1.57191e-11	K	LysR substrate binding domain	-	-
SMa1757	fixR	8.43	9.46	10.78	39.03	37.09	31.49	9.55667	35.87	1.9082	1.02165e-12	1.73932e-11	IQ	Dehydrogenases with different specificities (related to short-chain alcohol dehydrogenases)	-	ko:K00059
SMa2225		20.98	21.63	27.6	64.6	68.38	76.67	23.4033	69.8833	1.5782	1.22436e-12	2.07306e-11	C	BFD-like [2Fe-2S] binding domain	-	-
SMc00032		18.43	20.51	20.8	57.73	66.53	52.03	19.9133	58.7633	1.5612	1.75107e-12	2.9094e-11	S	Short repeat of unknown function (DUF308)	-	-
SMc02644	tex	157.24	153	167.31	369.72	345.61	337.58	159.183	350.97	1.1407	1.79557e-12	2.97538e-11	K	Transcriptional accessory protein	GO:0005575,GO:0005622,GO:0005623,GO:0005737,GO:0005829,GO:0008150,GO:0009314,GO:0009628,GO:0010212,GO:0044424,GO:0044444,GO:0044464,GO:0050896	ko:K06959
SMb20760	phnH	4.31	4.28	3.21	20.89	21.56	20.54	3.93333	20.9967	2.4163	2.161e-12	3.56192e-11	P	Carbon-phosphorus lyase	GO:0003674,GO:0005488,GO:0005515,GO:0005575,GO:0006793,GO:0008150,GO:0008152,GO:0009056,GO:0009987,GO:0019634,GO:0019637,GO:0019700,GO:0032991,GO:0042802,GO:0044237,GO:0046434,GO:0061694,GO:0061695,GO:0071704,GO:1901575,GO:1902494,GO:1904176,GO:1990234	ko:K06165
SMc04032		30.98	35.6	41.21	123.7	86.92	110.7	35.93	107.107	1.5758	2.24105e-12	3.67952e-11	K	Autoinducer binding domain	-	ko:K07782
SMc00810	ppx	195.08	201.67	213.25	469.23	430.22	437.33	203.333	445.593	1.1319	2.24418e-12	3.67952e-11	FP	Exopolyphosphatase	-	ko:K01524
SMc02706	MA20_44660	99.8	92.61	99.63	234.2	216.73	255.24	97.3467	235.39	1.2738	2.59906e-12	4.20588e-11	S	membrane	-	-
SMc02522		86.46	82.25	118.53	231.73	247.33	223.56	95.7467	234.207	1.2905	3.20788e-12	5.13756e-11	IQ	KR domain	-	ko:K00059
SMc00041	MA20_15750	240.77	255.53	232.34	541.8	530.59	503.05	242.88	525.147	1.1125	3.95954e-12	6.32509e-11	-	-	-	-
SMc02893		43.33	40.56	42.35	108.31	109.41	96.42	42.08	104.713	1.3152	4.14755e-12	6.60843e-11	K	transcriptional regulator	-	-
SMc04399		18.63	22.53	25.9	66.8	73.71	55.74	22.3533	65.4167	1.5492	4.5855e-12	7.26896e-11	I	CoA transferase having broad substrate specificity for short-chain acyl-CoA thioesters with the activity decreasing when the length of the carboxylic acid chain exceeds four carbons	-	ko:K01026
SMb20990	nfeD	25.1	20.96	20.42	62.4	66.99	61.81	22.16	63.7333	1.5241	5.03938e-12	7.9479e-11	O	NfeD-like C-terminal, partner-binding	-	ko:K07403
SMc01819	rutR	107.64	111.77	126.85	253.17	260.31	248.2	115.42	253.893	1.1373	5.53071e-12	8.63513e-11	K	transcriptional regulator	GO:0006355,GO:0008150,GO:0009889,GO:0009890,GO:0009891,GO:0009892,GO:0009893,GO:0010468,GO:0010556,GO:0010557,GO:0010558,GO:0010604,GO:0010605,GO:0010628,GO:0010629,GO:0019219,GO:0019222,GO:0031323,GO:0031324,GO:0031325,GO:0031326,GO:0031327,GO:0031328,GO:0045892,GO:0045893,GO:0045934,GO:0045935,GO:0048518,GO:0048519,GO:0048522,GO:0048523,GO:0050789,GO:0050794,GO:0051171,GO:0051172,GO:0051173,GO:…	ko:K09017
SMa0592		28.82	20.96	23.44	94.01	73.02	63.76	24.4067	76.93	1.6563	5.6156e-12	8.7457e-11	S	HipA-like C-terminal domain	-	ko:K07154
SMc03207		85.09	82.7	90.55	185.82	198.42	204.78	86.1133	196.34	1.189	7.93255e-12	1.21711e-10	Q	hydrolase	-	ko:K16171
SMa0160		16.47	26.14	39.89	87.96	137.22	82.73	27.5	102.637	1.9	8.10426e-12	1.23734e-10	K	FCD	-	-
SMc02085	exbB	218.22	197.39	195.48	472.53	453.4	418.17	203.697	448.033	1.1372	8.19966e-12	1.24884e-10	U	Biopolymer transport proteins	-	ko:K03561
SMc01614	tpiA1	24.51	25.69	30.63	92.09	67.22	78.63	26.9433	79.3133	1.5576	8.50088e-12	1.29155e-10	G	triose-phosphate isomerase	-	ko:K01803,ko:K21910
SMb20430	ehuD	29.41	31.55	36.86	91.54	88.55	76.67	32.6067	85.5867	1.3922	9.27953e-12	1.40382e-10	E	ABC transporter permease	-	ko:K02029
SMb20368		80.19	96.67	98.87	220.18	206.53	215.34	91.91	214.017	1.2194	9.87988e-12	1.49014e-10	M	HlyD membrane-fusion protein of T1SS	-	-
SMc02441	MA20_39715	38.43	41.69	51.8	114.63	109.87	109.72	43.9733	111.407	1.3411	1.01432e-11	1.52614e-10	S	protein conserved in bacteria	-	-
SMa1294		36.66	29.07	27.98	14.02	13.44	14.28	31.2367	13.9133	-1.1668	1.16725e-11	1.73523e-10	-	-	-	-
SMc04289		31.76	29.07	30.81	93.46	81.13	72.95	30.5467	82.5133	1.4336	1.22198e-11	1.81226e-10	Q	Part of the tripartite ATP-independent periplasmic (TRAP) transport system	-	-
SMc01643		143.13	146.69	160.88	339.21	330.54	297.29	150.233	322.347	1.1014	1.31574e-11	1.94667e-10	P	permease	-	ko:K02033
SMc01169	ald	1094.82	1013.1	1158.11	2094.91	2396.57	2480.83	1088.68	2324.1	1.0941	1.37373e-11	2.02764e-10	E	Belongs to the AlaDH PNT family	-	ko:K00259
SMc01644		83.72	70.53	86.21	200.67	185.67	177.2	80.1533	187.847	1.2287	1.38475e-11	2.03906e-10	P	ABC transporter (Permease	-	ko:K02034
SMa1507		53.13	62.87	73.35	153.66	151.13	155.3	63.1167	153.363	1.2809	1.61621e-11	2.36309e-10	S	ABC transporter substrate-binding protein PnrA-like	-	ko:K02058
SMc02854		30.98	30.65	36.11	85.21	86.23	78.04	32.58	83.16	1.3519	1.69121e-11	2.46694e-10	-	-	-	-
SMc03989		337.23	308.93	329.32	747.14	668.28	692.77	325.16	702.73	1.1118	1.70966e-11	2.48561e-10	S	Protein of unknown function (DUF1465)	-	ko:K13592
SMc00118	sufE	154.5	141.06	158.42	358.45	318.95	329.96	151.327	335.787	1.1499	2.05652e-11	2.97884e-10	S	SufE protein probably involved in Fe-S center assembly	-	ko:K02426
SMc02845		32.55	38.98	38.19	118.48	91.79	87.62	36.5733	99.2967	1.441	2.62571e-11	3.75084e-10	E	Glyoxalase/Bleomycin resistance protein/Dioxygenase superfamily	-	-
SMa1505		78.03	71.88	82.24	178.4	174.08	170.94	77.3833	174.473	1.1729	2.89421e-11	4.10974e-10	K	PFAM regulatory protein GntR HTH	-	-
SMb21525		17.45	17.35	26.28	60.75	58.41	65.33	20.36	61.4967	1.5948	2.89679e-11	4.10974e-10	K	helix_turn_helix gluconate operon transcriptional repressor	-	ko:K00375
SMa1050		2.94	2.25	2.65	17.87	14.84	16.43	2.61333	16.38	2.648	2.98182e-11	4.22074e-10	S	Sulfite exporter TauE/SafE	-	ko:K07090
SMc01410		46.27	53.85	50.29	162.73	108.71	156.27	50.1367	142.57	1.5077	3.20941e-11	4.53256e-10	I	Outer membrane lipoprotein	-	ko:K06077
SMc01977		33.53	35.83	65.79	131.67	182.43	118.13	45.05	144.077	1.6772	3.46422e-11	4.88133e-10	G	ABC-type sugar transport system, periplasmic component	-	ko:K02027
SMc02021		13.53	15.32	19.28	55.53	50.07	43.42	16.0433	49.6733	1.6305	3.47786e-11	4.88947e-10	G	Periplasmic binding protein domain	-	ko:K02058,ko:K10439
SMa1194	nnrS	37.84	31.55	34.22	14.84	21.33	14.67	34.5367	16.9467	-1.0271	3.77228e-11	5.26763e-10	P	protein involved in response to NO	-	ko:K07234
SMc03129	glpQ	26.66	25.69	22.69	9.35	10.89	11.74	25.0133	10.66	-1.2305	4.48506e-11	6.22102e-10	C	Glycerophosphoryl diester phosphodiesterase family	-	ko:K01126
SMa1053		3.53	4.06	3.97	22.82	15.76	22.3	3.85333	20.2933	2.3968	4.50951e-11	6.241e-10	S	transporter component	-	ko:K07112
SMa1533	nuoA2	10.78	11.94	11.53	52.5	35.47	34.81	11.4167	40.9267	1.8419	4.5246e-11	6.24797e-10	C	NDH-1 shuttles electrons from NADH, via FMN and iron- sulfur (Fe-S) centers, to quinones in the respiratory chain. The immediate electron acceptor for the enzyme in this species is believed to be ubiquinone. Couples the redox reaction to proton translocation (for every two electrons transferred, four hydrogen ions are translocated across the cytoplasmic membrane), and thus conserves the redox ene…	-	ko:K00330
SMa1056	bigR	2.35	2.25	1.89	16.77	14.14	13.69	2.16333	14.8667	2.7808	4.70216e-11	6.46443e-10	K	helix_turn_helix, Arsenical Resistance Operon Repressor	-	-
SMb20510	dgoD	30.59	31.55	39.32	86.04	85.07	87.82	33.82	86.31	1.3517	5.82821e-11	7.90753e-10	M	Galactonate dehydratase	-	ko:K01684
SMc02784	smrA	55.49	55.88	63.33	127.55	139.77	130.65	58.2333	132.657	1.1878	6.34362e-11	8.56941e-10	S	protein conserved in bacteria	-	-
SMa0664		54.31	45.52	49.15	155.31	110.1	136.13	49.66	133.847	1.4304	6.39999e-11	8.62679e-10	S	Adenylate cyclase	-	-
SMc04194		43.33	56.56	43.86	177.58	107.79	142.78	47.9167	142.717	1.5746	7.58358e-11	1.02001e-09	#N/A	#N/A	#N/A	#N/A
SMa0621	rdxI	13.33	12.84	19.66	48.38	47.06	46.55	15.2767	47.33	1.6314	8.01359e-11	1.0732e-09	P	Nitrogen fixation protein FixI	-	ko:K01533
SMc02381	yybR	14.9	21.18	20.23	56.35	56.79	49.29	18.77	54.1433	1.5284	9.27244e-11	1.23646e-09	K	transcriptional	-	-
SMc01814	preT	166.26	146.69	181.11	337.01	361.61	355.19	164.687	351.27	1.0929	1.09144e-10	1.44611e-09	E	dihydropyrimidine dehydrogenase	-	ko:K17722
SMc01143	hrcA	393.11	376.08	476.78	806.79	926.04	876.04	415.323	869.623	1.0662	1.14161e-10	1.50935e-09	K	Negative regulator of class I heat shock genes (grpE- dnaK-dnaJ and groELS operons). Prevents heat-shock induction of these operons	-	ko:K03705
SMc00949	hspQ	1446.95	1480.22	1553.79	3679.07	2875.23	3368.99	1493.65	3307.76	1.147	1.28655e-10	1.69019e-09	S	DNA-binding protein	-	ko:K11940
SMb20758	phnF	14.7	9.01	13.04	50.3	35	44.99	12.25	43.43	1.8259	1.3039e-10	1.70938e-09	K	transcriptional regulator	-	ko:K02043
SMc00564		30	25.91	21.36	97.58	68.84	68.26	25.7567	78.2267	1.6027	1.43506e-10	1.87737e-09	V	secretion protein	-	ko:K03543
SMc00591		95.29	101.17	123.64	363.95	253.82	228.05	106.7	281.94	1.4018	1.44411e-10	1.88523e-09	#N/A	#N/A	#N/A	#N/A
SMc02769	MA20_04040	355.27	390.73	508.73	933.51	996.5	828.51	418.243	919.507	1.1365	1.66622e-10	2.17063e-09	S	Protein of unknown function (DUF2852)	-	-
SMb20426		115.29	109.96	136.12	256.74	264.02	252.7	120.457	257.82	1.0978	1.71002e-10	2.22303e-09	K	transcriptional regulator	-	-
SMa2255		8.23	8.56	13.61	34.91	34.31	36.38	10.1333	35.2	1.7965	1.7747e-10	2.2975e-09	-	-	-	-
SMc01102	rmuC	124.7	122.36	121.75	288.08	250.11	277.15	122.937	271.78	1.1445	2.59781e-10	3.31844e-09	S	protein conserved in bacteria	-	ko:K09760
SMc03091	rocF	65.49	75.04	86.21	169.6	172.69	164.68	75.58	168.99	1.1609	2.7206e-10	3.45722e-09	E	Belongs to the arginase family	-	ko:K01476
SMb21379		51.76	41.46	44.99	146.24	103.38	118.33	46.07	122.65	1.4126	2.92349e-10	3.70262e-09	S	Domain of unknown function (DUF427)	-	-
SMb21355		8.43	8.34	9.26	31.06	30.83	27.38	8.67667	29.7567	1.778	2.92563e-10	3.70262e-09	S	Oxidoreductase family, C-terminal alpha/beta domain	-	-
SMc01706		9.02	10.59	11.72	38.48	32.68	32.27	10.4433	34.4767	1.723	2.94958e-10	3.72535e-09	-	-	-	-
SMb20149		13.53	16.22	23.06	55.8	62.82	43.62	17.6033	54.08	1.6192	3.13939e-10	3.94902e-09	S	protein conserved in bacteria	-	ko:K22129
SMb21638	paaI	4.51	10.14	7.94	44.81	24.34	30.9	7.53	33.35	2.147	3.3843e-10	4.2314e-09	S	Phenylacetic acid catabolic protein	-	ko:K02611
SMb20759	phnG	5.69	3.61	3.4	21.99	17.62	21.32	4.23333	20.31	2.2623	3.72275e-10	4.62664e-09	P	Phosphonate metabolism	GO:0005575,GO:0006793,GO:0008150,GO:0008152,GO:0009056,GO:0009987,GO:0019634,GO:0019637,GO:0019700,GO:0032991,GO:0044237,GO:0046434,GO:0061694,GO:0061695,GO:0071704,GO:1901575,GO:1902494,GO:1904176,GO:1990234	ko:K06166
SMc03845	MA20_43790	121.76	128.67	129.12	323.82	254.51	281.45	126.517	286.593	1.1797	3.87491e-10	4.79655e-09	S	secreted protein	-	-
SMa1252	nnrS	38.04	33.35	31.57	14.29	16.46	20.15	34.32	16.9667	-1.0163	4.29371e-10	5.2909e-09	P	NnrS protein	-	ko:K07234
SMb20590	acyP	9.21	11.94	12.67	42.06	38.25	30.32	11.2733	36.8767	1.7098	4.29981e-10	5.2909e-09	C	acylphosphatase	GO:0003674,GO:0003824,GO:0003998,GO:0016787,GO:0016817,GO:0016818	ko:K01512
SMc03809	lolA	58.23	63.77	79.21	183.07	160.64	138.28	67.07	160.663	1.2603	4.41013e-10	5.41592e-09	M	Participates in the translocation of lipoproteins from the inner membrane to the outer membrane. Only forms a complex with a lipoprotein if the residue after the N-terminal Cys is not an aspartate (The Asp acts as a targeting signal to indicate that the lipoprotein should stay in the inner membrane)	-	-
SMa0615		10.39	7.44	15.5	36.83	39.17	38.14	11.11	38.0467	1.7759	4.67018e-10	5.70148e-09	C	cytochrome C oxidase mono-heme subunit FixO	-	ko:K00405
SMb20230		59.8	88.11	113.24	254.54	238.29	200.48	87.05	231.103	1.4086	4.76619e-10	5.80727e-09	K	helix_turn _helix lactose operon repressor	-	-
SMc00370	ycaN	56.86	52.95	64.28	148.16	128.18	127.91	58.03	134.75	1.2154	4.89435e-10	5.94013e-09	K	transcriptional regulator	GO:0003674,GO:0003676,GO:0003677,GO:0003700,GO:0005488,GO:0006139,GO:0006351,GO:0006355,GO:0006725,GO:0006807,GO:0008150,GO:0008152,GO:0009058,GO:0009059,GO:0009889,GO:0009987,GO:0010467,GO:0010468,GO:0010556,GO:0016070,GO:0018130,GO:0019219,GO:0019222,GO:0019438,GO:0031323,GO:0031326,GO:0032774,GO:0034641,GO:0034645,GO:0034654,GO:0043170,GO:0043565,GO:0044237,GO:0044238,GO:0044249,GO:0044260,GO:…	-
SMc02589	ynjB	49.02	61.07	69.38	152.29	132.59	150.6	59.8233	145.16	1.2789	4.93418e-10	5.96948e-09	S	Bacterial extracellular solute-binding protein	-	ko:K02055,ko:K05777
SMc04444	fdsA	180.77	181.17	226.67	409.31	415.38	404.87	196.203	409.853	1.0628	5.11788e-10	6.17524e-09	C	formate dehydrogenase	-	ko:K00123
SMc01642		484.28	465.99	530.85	1077.55	951.76	1128.93	493.707	1052.75	1.0924	6.13209e-10	7.37037e-09	E	ABC-type dipeptide transport system, periplasmic component	-	ko:K02035
SMc02646		44.7	45.74	48.59	102.53	107.32	107.57	46.3433	105.807	1.191	6.68214e-10	7.95456e-09	C	glycerophosphoryl diester phosphodiesterase	-	ko:K01126
SMa0015		19.41	18.48	29.49	65.7	58.88	68.26	22.46	64.28	1.517	6.86141e-10	8.15235e-09	J	Elongation factor SelB, winged helix	-	ko:K03833
SMa1531	nuoC2	4.9	2.7	4.35	20.34	16.23	21.12	3.98333	19.23	2.2713	8.25266e-10	9.73094e-09	C	NDH-1 shuttles electrons from NADH, via FMN and iron- sulfur (Fe-S) centers, to quinones in the respiratory chain. The immediate electron acceptor for the enzyme in this species is believed to be ubiquinone. Couples the redox reaction to proton translocation (for every two electrons transferred, four hydrogen ions are translocated across the cytoplasmic membrane), and thus conserves the redox ene…	-	ko:K00332
SMa1532		5.29	3.83	5.1	24.74	15.99	24.84	4.74	21.8567	2.2051	8.55007e-10	1.00625e-08	C	NDH-1 shuttles electrons from NADH, via FMN and iron- sulfur (Fe-S) centers, to quinones in the respiratory chain. The immediate electron acceptor for the enzyme in this species is believed to be ubiquinone. Couples the redox reaction to proton translocation (for every two electrons transferred, four hydrogen ions are translocated across the cytoplasmic membrane), and thus conserves the redox ene…	-	ko:K00331
SMc04382	ndvB	807.98	775.37	963.77	1792.53	1683.55	1679.51	849.04	1718.53	1.0173	8.99166e-10	1.05423e-08	G	carbohydrate binding	GO:0003674,GO:0003824,GO:0016740,GO:0016757	ko:K13688,ko:K18786
SMb21636	paaK	10.2	15.1	11.34	54.98	31.29	43.81	12.2133	43.36	1.8279	1.02793e-09	1.19171e-08	C	Oxidoreductase NAD-binding domain	-	ko:K02613,ko:K21832
SMc00612	acvB	10.2	12.17	10.02	40.13	37.09	28.16	10.7967	35.1267	1.702	1.06684e-09	1.2314e-08	U	Type IV secretory pathway, VirJ component	-	-
SMc03794		186.46	184.55	185.46	380.72	370.18	389.61	185.49	380.17	1.0353	1.07888e-09	1.24151e-08	-	-	-	-
SMc02877		71.56	67.83	77.51	153.11	162.03	148.06	72.3	154.4	1.0946	1.12913e-09	1.29693e-08	M	glucosamine-fructose-6-phosphate aminotransferase	-	ko:K00820
SMc01815	preA	117.83	135.2	165.04	285.61	340.28	281.25	139.357	302.38	1.1176	1.19328e-09	1.36557e-08	C	Dehydrogenase	GO:0003674,GO:0003824,GO:0003954,GO:0006139,GO:0006206,GO:0006208,GO:0006725,GO:0006807,GO:0008150,GO:0008152,GO:0009056,GO:0009112,GO:0009987,GO:0016491,GO:0016651,GO:0034641,GO:0044237,GO:0044238,GO:0044248,GO:0044270,GO:0044281,GO:0046113,GO:0046483,GO:0046700,GO:0055086,GO:0055114,GO:0071704,GO:0072527,GO:0072529,GO:1901360,GO:1901361,GO:1901564,GO:1901565,GO:1901575	ko:K17723
SMb21346		23.33	11.72	13.42	54.15	50.53	54.96	16.1567	53.2133	1.7197	1.40207e-09	1.59862e-08	K	Periplasmic binding protein-like domain	-	ko:K02529
SMc06135		5.49	10.37	7.56	28.59	29.21	25.82	7.80667	27.8733	1.8361	1.90906e-09	2.14518e-08	#N/A	#N/A	#N/A	#N/A
SMa1052		3.14	2.93	1.89	19.24	12.75	13.5	2.65333	15.1633	2.5147	2.50414e-09	2.78866e-08	S	transporter component	-	ko:K07112
SMc03781	rlmH	229.79	249.67	295.67	541.53	515.52	559.97	258.377	539.007	1.0608	2.52986e-09	2.80268e-08	J	Specifically methylates the pseudouridine at position 1915 (m3Psi1915) in 23S rRNA	-	ko:K00783
SMc02228	fadA	134.7	155.25	130.63	255.37	391.97	324.28	140.193	323.873	1.208	2.60911e-09	2.87976e-08	I	Belongs to the thiolase family	GO:0003674,GO:0003824,GO:0003988,GO:0005575,GO:0005618,GO:0005623,GO:0005886,GO:0006082,GO:0006629,GO:0006631,GO:0006635,GO:0006725,GO:0006805,GO:0006950,GO:0006974,GO:0008150,GO:0008152,GO:0009056,GO:0009062,GO:0009404,GO:0009407,GO:0009410,GO:0009636,GO:0009850,GO:0009852,GO:0009987,GO:0010124,GO:0010817,GO:0016020,GO:0016042,GO:0016054,GO:0016408,GO:0016740,GO:0016746,GO:0016747,GO:0019395,GO:…	ko:K00626
SMc00115		26.47	25.01	24.58	87.41	58.41	64.74	25.3533	70.1867	1.469	2.68549e-09	2.95881e-08	S	Glyoxalase/Bleomycin resistance protein/Dioxygenase superfamily	-	ko:K07104
SMc04400	afr	13.33	18.48	18.34	40.68	50.76	49.68	16.7167	47.04	1.4926	2.84345e-09	3.12177e-08	S	Oxidoreductase family, C-terminal alpha/beta domain	-	ko:K19181
SMb20359		23.92	24.56	37.81	93.74	83.45	62.78	28.7633	79.99	1.4756	2.95047e-09	3.23355e-08	-	-	-	-
SMc01256	sdaA	330.37	349.27	372.62	760.88	665.73	836.92	350.753	754.51	1.1051	2.97424e-09	3.25386e-08	E	L-serine dehydratase	GO:0003674,GO:0003824,GO:0003941,GO:0006082,GO:0006520,GO:0006807,GO:0008150,GO:0008152,GO:0009056,GO:0009063,GO:0009987,GO:0016054,GO:0016829,GO:0016840,GO:0016841,GO:0019752,GO:0043436,GO:0044237,GO:0044238,GO:0044248,GO:0044281,GO:0044282,GO:0046395,GO:0071704,GO:1901564,GO:1901565,GO:1901575	ko:K01752
SMb21640	paaA	49.6	65.35	53.88	426.62	200.51	309.61	56.2767	312.247	2.4721	3.43081e-09	3.73363e-08	S	phenylacetic acid degradation protein	-	ko:K02609
SMc00098	ohrR	45.68	45.74	47.26	101.71	111.96	93.88	46.2267	102.517	1.1491	3.54587e-09	3.84538e-08	K	transcriptional regulator	GO:0001067,GO:0003674,GO:0003676,GO:0003677,GO:0005488,GO:0005575,GO:0005622,GO:0005623,GO:0005737,GO:0006355,GO:0008150,GO:0009889,GO:0010468,GO:0010556,GO:0019219,GO:0019222,GO:0031323,GO:0031326,GO:0044212,GO:0044424,GO:0044464,GO:0050789,GO:0050794,GO:0051171,GO:0051252,GO:0060255,GO:0065007,GO:0080090,GO:0097159,GO:1901363,GO:1903506,GO:2000112,GO:2001141	-
SMc04092		145.09	139.93	149.54	328.76	279.09	315.68	144.853	307.843	1.0876	3.69446e-09	3.99955e-08	S	Protein of unknown function (DUF1674)	-	-
SMc02873		206.85	211.14	272.99	438.99	576.95	452.59	230.327	489.51	1.0877	4.05979e-09	4.37219e-08	G	Sugar ABC transporter, substrate-binding protein	-	ko:K10117
SMb20771		15.29	17.13	24.77	59.93	50.76	49.68	19.0633	53.4567	1.4876	5.45217e-09	5.79142e-08	S	Tripartite tricarboxylate transporter family receptor	-	-
SMc04385	alh	322.72	405.15	445.21	964.57	750.8	950.75	391.027	888.707	1.1844	5.63819e-09	5.97879e-08	C	Belongs to the aldehyde dehydrogenase family	-	ko:K00128
SMa0011	selA	15.29	9.69	20.04	42.06	46.36	49.87	15.0067	46.0967	1.6191	6.14487e-09	6.49392e-08	E	L-seryl-tRNA selenium transferase	-	ko:K01042
SMb20668	MA20_16450	12.35	11.27	11.91	34.91	41.49	29.53	11.8433	35.31	1.576	6.17176e-09	6.51126e-08	I	NAD-binding of NADP-dependent 3-hydroxyisobutyrate dehydrogenase	-	ko:K08319
SMc04299		34.7	29.52	32.89	83.29	73.71	75.69	32.37	77.5633	1.2607	7.13833e-09	7.43008e-08	S	TIGRFAM HAD-superfamily hydrolase, subfamily IIB	-	-
SMc04055		43.92	48.9	47.26	103.36	102.92	103.27	46.6933	103.183	1.1439	7.78091e-09	8.07189e-08	K	Transcriptional regulator	GO:0006139,GO:0006351,GO:0006725,GO:0006807,GO:0008150,GO:0008152,GO:0009058,GO:0009059,GO:0009314,GO:0009628,GO:0009987,GO:0010212,GO:0010467,GO:0016070,GO:0018130,GO:0019438,GO:0032774,GO:0034641,GO:0034645,GO:0034654,GO:0043170,GO:0044237,GO:0044238,GO:0044249,GO:0044260,GO:0044271,GO:0046483,GO:0050896,GO:0071704,GO:0090304,GO:0097659,GO:1901360,GO:1901362,GO:1901576	-
SMc02261	betI	43.92	44.17	41.21	98.41	96.66	93.88	43.1	96.3167	1.1601	9.44758e-09	9.73587e-08	K	Transcriptional regulator	-	ko:K02167
SMc01976	mdeA	17.65	18.25	34.97	63.5	82.29	62.39	23.6233	69.3933	1.5546	9.80231e-09	1.00847e-07	E	Cystathionine beta-lyases cystathionine	-	-
SMc00938		108.62	115.6	120.61	234.48	226.93	244.88	114.943	235.43	1.0344	1.09834e-08	1.1244e-07	-	-	-	-
SMc01600		48.23	45.74	62.2	107.48	174.08	109.33	52.0567	130.297	1.3236	1.24833e-08	1.27166e-07	E	N-formylglutamate amidohydrolase	-	-
SMc02525	fdsB	71.56	61.07	81.67	156.14	152.76	154.91	71.4333	154.603	1.1139	1.31526e-08	1.33111e-07	C	NADH ubiquinone oxidoreductase, NADH-binding (51 kD) subunit	-	ko:K00124,ko:K00335
SMa2259		9.21	11.49	10.96	32.16	33.15	28.95	10.5533	31.42	1.574	1.31999e-08	1.33373e-07	-	-	-	-
SMa1961		35.68	35.6	44.99	91.81	84.14	96.62	38.7567	90.8567	1.2291	1.46634e-08	1.46023e-07	Q	de-polymerase	-	-
SMa6099		15.88	16.22	18.9	52.78	45.43	39.31	17	45.84	1.4311	1.66528e-08	1.65041e-07	D	Antitoxin component of a toxin-antitoxin (TA) module	-	-
SMc00453		78.03	77.74	91.69	180.33	163.42	183.85	82.4867	175.867	1.0922	1.84242e-08	1.82016e-07	S	Belongs to the UPF0061 (SELO) family	-	ko:K08997
SMc03835	ligT	98.82	89.91	111.73	191.32	275.14	192.26	100.153	219.573	1.1325	1.96381e-08	1.937e-07	J	Hydrolyzes RNA 2',3'-cyclic phosphodiester to an RNA 2'- phosphomonoester	-	ko:K01975
SMa1141		23.92	26.36	24.01	14.02	7.65	13.1	24.7633	11.59	-1.0953	2.14559e-08	2.1096e-07	K	family. transcriptional regulator	-	ko:K01420
SMc02785	mltA	303.11	300.14	367.7	684.19	606.62	707.05	323.65	665.953	1.041	2.17933e-08	2.1394e-07	M	membrane-bound lytic murein transglycosylase	-	ko:K08304
SMc00876	mrp	295.27	326.28	333.67	685.57	588.77	638.01	318.407	637.45	1.0014	2.22278e-08	2.1786e-07	D	Binds and transfers iron-sulfur (Fe-S) clusters to target apoproteins. Can hydrolyze ATP	-	ko:K03593
SMc01625		9.61	9.24	14.56	36.28	32.92	31.49	11.1367	33.5633	1.5916	2.42368e-08	2.36804e-07	G	ATPases associated with a variety of cellular activities	-	ko:K10112
SMc01613	rpiB	24.9	25.46	26.66	72.02	57.49	59.65	25.6733	63.0533	1.2963	2.83771e-08	2.75955e-07	G	isomerase	-	ko:K01808,ko:K21911
SMb20509		37.25	32.67	39.7	86.04	78.81	87.43	36.54	84.0933	1.2025	2.86039e-08	2.77293e-07	K	FCD	-	-
SMb21205	ybhS	5.1	4.73	12.1	31.34	33.15	21.51	7.31	28.6667	1.9714	3.04541e-08	2.94274e-07	V	ABC-2 family transporter protein	GO:0003674,GO:0005215,GO:0005575,GO:0005623,GO:0005886,GO:0005887,GO:0006810,GO:0006855,GO:0008150,GO:0015562,GO:0015893,GO:0016020,GO:0016021,GO:0022857,GO:0031224,GO:0031226,GO:0042221,GO:0042493,GO:0044425,GO:0044459,GO:0044464,GO:0050896,GO:0051179,GO:0051234,GO:0055085,GO:0071944	ko:K01992
SMc04163		36.47	45.52	52.93	107.48	106.16	92.51	44.9733	102.05	1.1821	3.04977e-08	2.94274e-07	K	LysR substrate binding domain	-	-
SMb20670		20.19	21.18	21.93	56.63	51	48.9	21.1	52.1767	1.3062	3.44096e-08	3.29971e-07	S	Putative sugar-binding N-terminal domain	-	ko:K21948
SMc00019	MA20_18155	103.72	90.81	121.18	229.25	234.35	192.85	105.237	218.817	1.0561	3.57425e-08	3.41699e-07	K	Belongs to the UPF0301 (AlgH) family	-	ko:K07735
SMa0751		86.66	93.96	86.21	173.45	195.64	168.4	88.9433	179.163	1.0103	3.80539e-08	3.62124e-07	P	Ring hydroxylating alpha subunit (catalytic domain)	-	ko:K00479
SMc01813		138.62	142.19	197.93	327.11	351.64	320.37	159.58	333.04	1.0614	3.8981e-08	3.69947e-07	L	Endonuclease/Exonuclease/phosphatase family	-	-
SMc00286		69.41	67.15	59.36	194.34	135.83	137.11	65.3067	155.76	1.254	3.92657e-08	3.71947e-07	Q	COG2931 RTX toxins and related Ca2 -binding proteins	-	-
SMc01967	speB	96.27	97.79	116.08	222.66	201.66	210.65	103.38	211.657	1.0338	4.40463e-08	4.15281e-07	E	Belongs to the arginase family	-	ko:K01480
SMa0002	fdhA1	50.19	61.29	79.59	174.55	133.75	145.52	63.69	151.273	1.248	4.41078e-08	4.15281e-07	C	Molydopterin dinucleotide binding domain	-	ko:K00123
SMc00518	MA20_09415	27.25	29.07	36.49	70.65	70.47	75.5	30.9367	72.2067	1.2228	5.50702e-08	5.1565e-07	O	XdhC CoxF family	-	ko:K07402
SMa1677		23.92	21.63	42.35	76.97	79.51	77.45	29.3	77.9767	1.4121	5.51e-08	5.1565e-07	Q	Amidohydrolase family	-	-
SMb20167	MA20_34470	49.21	36.73	60.68	118.75	118.91	103.86	48.8733	113.84	1.2199	5.56757e-08	5.20254e-07	S	Sulfur oxidation protein SoxY	-	ko:K17226
SMc02086		30.98	35.6	31.95	86.59	74.18	68.26	32.8433	76.3433	1.2169	6.17785e-08	5.74688e-07	S	membrane metal-binding protein	-	ko:K02238
SMc01160		15.88	26.36	24.77	72.02	71.16	44.01	22.3367	62.3967	1.4821	7.19938e-08	6.65729e-07	K	transcriptional regulator	-	-
SMc05008		419.97	484.02	483.59	2743.64	1377.81	1703.96	462.527	1941.8	2.0698	8.88986e-08	8.14773e-07	#N/A	#N/A	#N/A	#N/A
SMc00225	tam	91.76	84.27	130.44	206.16	232.96	227.47	102.157	222.197	1.1211	1.01405e-07	9.25302e-07	S	Catalyzes the S-adenosylmethionine monomethyl esterification of trans-aconitate	-	ko:K00598
SMb20072		29.41	32	39.7	77.52	94.11	64.54	33.7033	78.7233	1.2239	1.08313e-07	9.81132e-07	G	Periplasmic binding proteins and sugar binding domain of LacI family	-	ko:K10439,ko:K17213
SMb20674		31.96	45.52	58.61	123.7	136.99	86.06	45.3633	115.583	1.3493	1.10911e-07	1.00175e-06	K	helix_turn _helix lactose operon repressor	-	ko:K02529
SMc00799		21.17	25.01	17.77	57.73	51.23	51.83	21.3167	53.5967	1.3302	1.13205e-07	1.02098e-06	S	MgtC family	-	ko:K07507
SMc01610		45.09	36.5	38.19	86.86	91.1	86.06	39.9267	88.0067	1.1403	1.21282e-07	1.08908e-06	K	Bacterial regulatory helix-turn-helix proteins, AraC family	-	ko:K07506
SMb21222		16.27	11.04	13.23	32.16	41.49	38.14	13.5133	37.2633	1.4634	1.29269e-07	1.15413e-06	GK	ROK family	-	-
SMc01459		49.6	53.18	54.82	106.93	129.81	96.03	52.5333	110.923	1.0783	1.34532e-07	1.19597e-06	S	Putative cyclase	-	-
SMa0009	fdhE	30.19	27.27	30.81	61.57	71.86	65.13	29.4233	66.1867	1.1696	1.34764e-07	1.19632e-06	O	Necessary for formate dehydrogenase activity	-	ko:K02380
SMa5030		16.27	17.35	20.98	50.03	42.88	44.59	18.2	45.8333	1.3325	1.41549e-07	1.25148e-06	K	Bacterial regulatory proteins, tetR family	-	-
SMb21010	bdhA2	62.54	51.38	68.06	156.41	114.51	147.67	60.66	139.53	1.2018	1.55843e-07	1.36781e-06	IQ	Dehydrogenases with different specificities (related to short-chain alcohol dehydrogenases)	-	ko:K00019
SMc01615	gatR	67.64	83.37	65.6	201.77	141.4	156.08	72.2033	166.417	1.2047	1.7733e-07	1.54548e-06	K	DeoR C terminal sensor domain	-	-
SMb20762	phnJ	2.94	4.73	5.29	19.52	16.23	14.86	4.32	16.87	1.9654	1.78486e-07	1.54912e-06	P	Catalyzes the breakage of the C-P bond in alpha-D-ribose 1-methylphosphonate 5-phosphate (PRPn) forming alpha-D-ribose	GO:0003674,GO:0003824,GO:0005488,GO:0005575,GO:0006793,GO:0008150,GO:0008152,GO:0009056,GO:0009987,GO:0016829,GO:0018835,GO:0019634,GO:0019637,GO:0019700,GO:0032991,GO:0044237,GO:0046434,GO:0048037,GO:0051536,GO:0051539,GO:0051540,GO:0071704,GO:0098848,GO:1901575,GO:1902494,GO:1904176	ko:K06163
SMc00022		84.31	79.32	87.15	170.7	159.94	178.96	83.5933	169.867	1.0229	1.78495e-07	1.54912e-06	S	Protein of unknown function (DUF721)	-	-
SMc03210		14.51	16.22	18.34	39.03	43.58	40.29	16.3567	40.9667	1.3246	1.81985e-07	1.57721e-06	K	helix_turn_helix ASNC type	-	-
SMc02150	MA20_20850	71.17	77.51	72.22	132.5	168.75	147.47	73.6333	149.573	1.0224	1.91366e-07	1.64971e-06	S	2-nitropropane dioxygenase	-	ko:K00459
SMa1538	nuoL3	8.82	6.76	8.13	26.11	26.66	20.54	7.90333	24.4367	1.6285	2.24016e-07	1.91477e-06	CP	Formate hydrogenlyase subunit 3 Multisubunit Na H antiporter, MnhD subunit	-	ko:K05568
SMc00879	kdgR	31.37	33.8	44.05	86.31	97.82	67.67	36.4067	83.9333	1.205	2.24684e-07	1.91784e-06	K	transcriptional regulator	-	ko:K13641
SMc01747	hemP	9.41	13.75	10.4	34.64	28.74	31.49	11.1867	31.6233	1.4992	2.81142e-07	2.37949e-06	P	Hemin uptake protein	-	-
SMa1525	nuoF2	3.53	2.93	2.65	16.77	10.2	14.47	3.03667	13.8133	2.1855	2.86924e-07	2.41919e-06	C	NDH-1 shuttles electrons from NADH, via FMN and iron- sulfur (Fe-S) centers, to quinones in the respiratory chain	-	ko:K00335
SMb20956	exoL	64.31	63.99	64.47	148.16	128.42	121.07	64.2567	132.55	1.0446	2.89377e-07	2.43657e-06	M	transferase activity, transferring glycosyl groups	GO:0005575,GO:0005622,GO:0005623,GO:0005737,GO:0044424,GO:0044464	ko:K16558
SMc03791	MA20_43655	151.17	148.72	163.91	319.69	276.77	346.97	154.6	314.477	1.0244	2.97526e-07	2.49841e-06	S	Zincin-like metallopeptidase	-	ko:K00930
SMa1755	MA20_01570	18.63	18.93	18.34	50.3	49.84	37.75	18.6333	45.9633	1.3026	2.99255e-07	2.50954e-06	E	Bacterial extracellular solute-binding protein	-	ko:K02055
SMb20664		23.53	25.01	28.17	57.45	68.61	50.46	25.57	58.84	1.2023	3.34388e-07	2.78537e-06	K	FCD	-	-
SMc03836	tesA	76.46	74.13	80.72	158.06	145.11	173.88	77.1033	159.017	1.0443	3.3792e-07	2.8079e-06	E	Lysophospholipase L1 and related esterases	-	ko:K10804
SMa1959		25.1	26.14	24.95	66.8	56.1	53.59	25.3967	58.83	1.2119	3.99302e-07	3.28644e-06	EGP	Sugar (and other) transporter	-	-
SMa0792		12.94	16.67	20.23	37.93	56.56	36.97	16.6133	43.82	1.3992	5.09506e-07	4.1495e-06	I	Alpha/beta hydrolase family	-	-
SMc01658	fhuF	35.88	31.32	29.87	78.34	70.47	67.67	32.3567	72.16	1.1571	5.18034e-07	4.20792e-06	S	ferric iron reductase	-	ko:K13255
SMa0570		40.39	45.52	40.08	94.84	86.46	86.06	41.9967	89.12	1.0855	5.34748e-07	4.33237e-06	T	Adenylyl- / guanylyl cyclase, catalytic domain	-	-
SMb21212		29.41	32.22	33.65	75.87	73.94	59.65	31.76	69.82	1.1364	5.67924e-07	4.58918e-06	-	-	-	-
SMa1625		21.57	22.76	28.17	55.53	78.81	45.38	24.1667	59.9067	1.3097	6.29383e-07	5.03993e-06	K	LysR substrate binding domain	-	-
SMa0064		18.04	19.38	25.9	53.33	54.01	43.81	21.1067	50.3833	1.2552	6.92894e-07	5.49996e-06	M	mandelate racemase muconate lactonizing	-	-
SMb21493		43.72	64.67	68.25	138.27	126.33	120.48	58.88	128.36	1.1243	6.93027e-07	5.49996e-06	K	helix_turn_helix ASNC type	-	-
SMc04384		145.28	211.81	179.41	421.13	324.29	427.16	178.833	390.86	1.128	7.35192e-07	5.81972e-06	C	FAD linked oxidases, C-terminal domain	-	-
SMc02727		22.94	29.74	25.71	70.65	56.56	55.74	26.13	60.9833	1.2227	7.52662e-07	5.95043e-06	S	protein conserved in bacteria	-	-
SMb20581	hpd	14.7	15.1	17.77	36.56	39.87	39.9	15.8567	38.7767	1.2901	7.70796e-07	6.07834e-06	EG	Hydroxyphenylpyruvate dioxygenase, HPPD, N-terminal	-	ko:K00457
SMb20667		13.14	14.42	17.39	40.96	38.71	33.25	14.9833	37.64	1.3289	7.89677e-07	6.21146e-06	K	helix_turn _helix lactose operon repressor	-	ko:K06145
SMb21136		1.76	1.58	4.16	9.9	14.84	11.74	2.5	12.16	2.2821	7.99578e-07	6.28138e-06	E	Binding-protein-dependent transport system inner membrane component	-	ko:K02029
SMc04081	sqdD	14.12	14.42	20.23	40.13	47.06	35.21	16.2567	40.8	1.3275	8.23325e-07	6.45163e-06	M	glycosyl transferase	-	-
SMb20148		12.16	13.97	23.82	43.98	57.02	36.38	16.65	45.7933	1.4596	9.05946e-07	7.0723e-06	K	Transcriptional regulator	-	ko:K05799
SMc00880	fabG1	104.11	102.98	171.47	239.7	362.76	260.13	126.187	287.53	1.1882	9.83557e-07	7.63978e-06	IQ	reductase	-	ko:K22185,ko:K22215
SMa1641		20.98	17.58	23.44	48.11	50.07	45.77	20.6667	47.9833	1.2152	9.91395e-07	7.69104e-06	EGP	Major Facilitator Superfamily	-	-
SMa1725		10.78	8.11	11.15	28.86	27.82	25.82	10.0133	27.5	1.4575	1.11096e-06	8.56518e-06	K	DJ-1/PfpI family	-	-
SMc04389	ttuD2	30.39	27.72	31.19	63.5	67.69	60.44	29.7667	63.8767	1.1016	1.12595e-06	8.66999e-06	G	hydroxypyruvate reductase	-	ko:K11529
SMb20256		43.13	37.18	45.56	88.51	88.55	83.32	41.9567	86.7933	1.0487	1.14015e-06	8.76844e-06	S	Polyketide cyclase / dehydrase and lipid transport	-	-
SMa2163	mmsR	7.65	9.24	8.51	26.94	22.02	24.06	8.46667	24.34	1.5235	1.14556e-06	8.79916e-06	K	sequence-specific DNA binding	-	ko:K02529,ko:K02854,ko:K13652
SMc00811	ftsJ	78.03	77.97	81.67	176.48	137.92	194.81	79.2233	169.737	1.0993	1.22037e-06	9.33911e-06	J	Specifically methylates the uridine in position 2552 of 23S rRNA at the 2'-O position of the ribose in the fully assembled 50S ribosomal subunit	-	ko:K02427
SMb21336		5.49	4.73	6.24	21.72	16.23	17.02	5.48667	18.3233	1.7397	1.22577e-06	9.36891e-06	K	helix_turn_helix, arabinose operon control protein	-	ko:K07506
SMb21294		64.9	71.43	68.62	165.21	127.95	131.24	68.3167	141.467	1.0502	1.24814e-06	9.51831e-06	O	Belongs to the small heat shock protein (HSP20) family	GO:0003674,GO:0005488,GO:0005515,GO:0005575,GO:0005622,GO:0005623,GO:0005634,GO:0005737,GO:0006457,GO:0006950,GO:0006986,GO:0008150,GO:0009266,GO:0009408,GO:0009628,GO:0009987,GO:0010033,GO:0033554,GO:0034605,GO:0034620,GO:0035966,GO:0035967,GO:0042221,GO:0042802,GO:0043226,GO:0043227,GO:0043229,GO:0043231,GO:0044424,GO:0044464,GO:0050896,GO:0051082,GO:0051716,GO:0051788,GO:0061077,GO:0070887,GO:…	ko:K13993
SMb20478		12.94	14.87	13.99	28.04	42.65	36.57	13.9333	35.7533	1.3595	1.25192e-06	9.53365e-06	P	ATPases associated with a variety of cellular activities	-	ko:K02031,ko:K02034,ko:K12371
SMc04882	gcvA	48.62	60.61	69.95	122.87	130.5	112.46	59.7267	121.943	1.0298	1.38354e-06	1.04845e-05	K	Transcriptional regulator	-	ko:K03566
SMc00073		36.86	36.5	45.56	94.01	75.33	89.77	39.64	86.37	1.1236	1.39665e-06	1.0571e-05	CO	to be involved in C-type cytochrome biogenesis	-	-
SMb20958	exoM	18.23	18.25	25.14	52.23	50.53	42.44	20.54	48.4	1.2366	1.46035e-06	1.10397e-05	M	Glycosyl transferase family 2	GO:0005575,GO:0005623,GO:0005886,GO:0016020,GO:0044464,GO:0071944	ko:K16556
SMa1765		31.57	28.84	39.89	87.41	81.13	59.46	33.4333	76	1.1847	1.52076e-06	1.14268e-05	S	Bacterial protein of unknown function (DUF937)	-	-
SMa1255		10.98	8.56	10.78	4.4	3.48	4.11	10.1067	3.99667	-1.3384	1.64018e-06	1.22354e-05	S	Iron-sulfur cluster assembly protein	-	-
SMa1933		22.55	20.05	19.47	51.13	45.43	46.94	20.69	47.8333	1.2091	1.81755e-06	1.33977e-05	K	LysR substrate binding domain	-	-
SMb20957	exoA	21.37	27.49	34.41	68.17	71.86	52.61	27.7567	64.2133	1.21	1.86156e-06	1.36896e-05	M	Succinoglycan biosynthesis protein	GO:0005575,GO:0005623,GO:0005886,GO:0016020,GO:0044464,GO:0071944	ko:K16557
SMb20161		14.7	19.38	22.69	49.48	47.06	39.51	18.9233	45.35	1.2609	1.98296e-06	1.44752e-05	-	-	-	-
SMb20773		26.86	18.48	23.25	58.55	50.76	51.24	22.8633	53.5167	1.227	1.98469e-06	1.44752e-05	K	FCD	-	ko:K11475
SMb21494	arcB	98.42	87.43	70.7	170.98	170.6	239.59	85.5167	193.723	1.1797	2.05976e-06	1.497e-05	E	ornithine cyclodeaminase	-	ko:K01750
SMa0796	dhaS	34.51	41.24	36.49	75.32	81.59	75.11	37.4133	77.34	1.0477	2.13634e-06	1.54543e-05	C	belongs to the aldehyde dehydrogenase family	-	ko:K00128
SMc01557		155.48	184.55	138.01	916.19	497.9	502.66	159.347	638.917	2.0035	2.16985e-06	1.56784e-05	-	-	-	-
SMb21649	agpT	32.94	36.28	34.22	71.75	71.39	72.17	34.48	71.77	1.0576	2.27057e-06	1.63113e-05	K	AraC family transcriptional regulator	-	-
SMb21639	paaB	3.14	4.51	2.84	13.74	12.75	13.3	3.49667	13.2633	1.9234	2.2782e-06	1.63473e-05	Q	Phenylacetic acid degradation	-	ko:K02610
SMc04386	aatB	137.83	181.39	194.53	379.07	299.25	385.89	171.25	354.737	1.0506	2.5903e-06	1.8433e-05	E	DegT/DnrJ/EryC1/StrS aminotransferase family	-	ko:K00812
SMc02519	glpS	39.41	36.05	59.36	89.06	181.73	85.86	44.94	118.883	1.4035	2.62598e-06	1.8649e-05	P	Belongs to the ABC transporter superfamily	-	ko:K17324
SMb20612	dctB	41.37	34.25	41.21	84.12	78.58	79.41	38.9433	80.7033	1.0513	2.98477e-06	2.10049e-05	T	Signal transduction histidine kinase regulating C4-dicarboxylate transport system	GO:0005575,GO:0005623,GO:0005886,GO:0016020,GO:0044464,GO:0071944	ko:K10125
SMc00926	glcF	61.76	58.14	78.08	153.94	133.05	117.94	65.9933	134.977	1.0323	3.04109e-06	2.13771e-05	C	Glycolate oxidase, iron-sulfur subunit	-	ko:K11473
SMa1591		13.92	16.9	13.8	42.33	33.15	35.01	14.8733	36.83	1.3082	3.19462e-06	2.23804e-05	T	Adenylate	-	-
SMc01516		32.94	25.91	25.9	68.17	68.84	52.61	28.25	63.2067	1.1618	3.32498e-06	2.32412e-05	M	Uncharacterized protein conserved in bacteria (DUF2325)	-	-
SMc00195		3.92	4.51	4.35	21.44	12.75	12.71	4.26	15.6333	1.8757	3.4023e-06	2.37283e-05	M	Sulfatase	-	-
SMc01504	phyR	63.13	84.73	121.37	243.27	177.79	194.61	89.7433	205.223	1.1933	3.6084e-06	2.50812e-05	T	response regulator	-	-
SMc02638		14.51	12.62	15.31	36.01	35.23	31.49	14.1467	34.2433	1.2754	3.65902e-06	2.53763e-05	S	Activator of Hsp90 ATPase homolog 1-like protein	-	-
SMc01757		221.16	206.41	222.51	494.24	351.87	469.41	216.693	438.507	1.0169	4.00721e-06	2.76368e-05	P	Rhodanese Homology Domain	-	-
SMa2357		17.84	14.87	13.42	43.43	32.92	38.92	15.3767	38.4233	1.3212	4.07012e-06	2.80396e-05	T	Adenylate cyclase	-	ko:K01768
SMb20009		17.84	18.03	19.09	43.71	43.11	38.14	18.32	41.6533	1.185	4.08849e-06	2.81349e-05	K	LysR substrate binding domain	-	-
SMc01620	eryB	13.72	16.22	19.47	46.18	34.54	40.1	16.47	40.2733	1.29	4.18742e-06	2.87521e-05	C	C-terminal domain of alpha-glycerophosphate oxidase	-	ko:K00111,ko:K21054
SMc00084		26.66	32.45	42.91	89.61	69.54	70.8	34.0067	76.65	1.1725	4.33708e-06	2.96487e-05	-	-	-	-
SMc00337		5.88	3.61	6.62	18.14	15.76	18.39	5.37	17.43	1.6986	4.54287e-06	3.08518e-05	-	-	-	-
SMb20959	exoO	19.8	22.76	29.49	51.95	57.72	49.87	24.0167	53.18	1.1468	4.96987e-06	3.35682e-05	M	Succinoglycan biosynthesis protein ExoO	GO:0005575,GO:0005622,GO:0005623,GO:0005737,GO:0044424,GO:0044464	ko:K16555
SMa1428	MA20_16910	16.27	20.05	17.2	44.26	38.94	40.1	17.84	41.1	1.204	5.98079e-06	4.0005e-05	K	Bacterial regulatory proteins, tetR family	-	-
SMb20723		29.61	29.97	34.22	67.62	66.29	59.85	31.2667	64.5867	1.0466	6.00726e-06	4.01388e-05	P	Iron ABC transporter	-	ko:K02012
SMa1285	ubiX	12.94	10.37	9.64	4.67	6.03	4.11	10.9833	4.93667	-1.1537	6.01887e-06	4.01732e-05	H	Flavin prenyltransferase that catalyzes the synthesis of the prenylated FMN cofactor (prenyl-FMN) for 4-hydroxy-3- polyprenylbenzoic acid decarboxylase UbiD. The prenyltransferase is metal-independent and links a dimethylallyl moiety from dimethylallyl monophosphate (DMAP) to the flavin N5 and C6 atoms of FMN	-	ko:K03186
SMc01506	sigH	69.41	82.7	116.26	227.06	162.95	193.24	89.4567	194.417	1.1199	6.52509e-06	4.34121e-05	K	Belongs to the sigma-70 factor family. ECF subfamily	-	ko:K03088
SMa1409		4.71	7.21	6.81	18.42	20.4	16.82	6.24333	18.5467	1.5708	6.639e-06	4.40756e-05	I	Malonate decarboxylase, alpha subunit, transporter	-	ko:K01026
SMa5004		2.74	5.41	4.16	0.27	0.23	0	4.10333	0.166667	-4.6218	7.84515e-06	5.16417e-05	L	PFAM Integrase catalytic region	-	ko:K07497
SMb21481		26.66	37.41	41.02	109.95	65.37	74.71	35.03	83.3433	1.2505	7.8952e-06	5.19162e-05	S	Domain in cystathionine beta-synthase and other proteins.	-	-
SMb20257		16.08	11.94	12.1	33.54	32.68	32.08	13.3733	32.7667	1.2929	7.90519e-06	5.19269e-05	T	Adenylate cyclase	-	ko:K01768
SMa1536	nuoM3	2.94	2.03	3.4	10.45	10.89	11.74	2.79	11.0267	1.9827	8.66228e-06	5.64229e-05	C	Oxidoreductase	-	ko:K00342
SMb21579	hmrR	12.55	12.39	16.07	30.51	40.8	28.56	13.67	33.29	1.2841	9.28379e-06	6.00307e-05	K	Transcriptional regulator	-	ko:K19591
SMb20370		9.61	9.69	15.12	32.16	28.28	27.58	11.4733	29.34	1.3546	1.02102e-05	6.56113e-05	V	ATPases associated with a variety of cellular activities	-	ko:K02003,ko:K05685,ko:K09810
SMc01521	vapC	28.82	29.97	34.03	63.22	65.14	60.44	30.94	62.9333	1.0244	1.07554e-05	6.89719e-05	S	Toxic component of a toxin-antitoxin (TA) module. An RNase	-	ko:K18828
SMc02516	MA20_44780	30.78	36.95	60.12	89.89	151.36	77.45	42.6167	106.233	1.3177	1.09584e-05	7.02013e-05	P	ABC-type sugar transport system, permease component	-	ko:K17323
SMc04398		4.71	3.61	2.46	13.47	12.98	12.13	3.59333	12.86	1.8395	1.1845e-05	7.55695e-05	I	Enoyl-CoA hydratase/isomerase	-	-
SMc03155		33.72	33.57	45.75	73.94	77.65	79.41	37.68	77	1.0311	1.20486e-05	7.67898e-05	S	CHAD	-	-
SMa1400		1.96	2.48	0.57	11.27	7.65	7.24	1.67	8.72	2.3845	1.31307e-05	8.30053e-05	I	Acyl-CoA dehydrogenase, C-terminal domain	-	-
SMb20360		10.98	9.01	14.18	31.89	33.84	22.49	11.39	29.4067	1.3684	1.35118e-05	8.48964e-05	S	PeriplasmiC protein	-	-
SMb20203	cbbR	32.94	38.76	36.86	76.14	79.74	62.78	36.1867	72.8867	1.0102	1.41763e-05	8.86234e-05	K	LysR substrate binding domain	-	ko:K21703
SMa0617		14.9	13.07	17.39	32.99	35.7	35.99	15.12	34.8933	1.2065	1.45961e-05	9.09728e-05	C	C-type cytochrome. Part of the cbb3-type cytochrome c oxidase complex	-	ko:K00406
SMc00233	yjbB	35.1	31.55	37.05	63.22	75.57	69.04	34.5667	69.2767	1.003	1.49721e-05	9.29439e-05	P	Phosphate	-	ko:K03324
SMb20901	xylR	34.9	30.87	28.92	69.27	80.2	53	31.5633	67.49	1.0964	1.55971e-05	9.65343e-05	GK	ROK family	-	-
SMa1720		17.25	13.75	18.15	41.78	34.31	37.75	16.3833	37.9467	1.2117	1.56182e-05	9.65687e-05	K	LysR substrate binding domain	-	-
SMc03209		7.45	8.79	11.53	27.76	31.29	17.6	9.25667	25.55	1.4648	1.57731e-05	9.74294e-05	K	helix_turn_helix multiple antibiotic resistance protein	-	-
SMc01623	eryA	15.49	21.41	18.9	48.11	40.33	38.14	18.6	42.1933	1.1817	1.62282e-05	0.000100042	G	FGGY family of carbohydrate kinases, C-terminal domain	-	ko:K00862
SMb21287	xdhB	72.94	63.77	103.79	131.12	216.5	167.03	80.1667	171.55	1.0976	1.66822e-05	0.000102739	F	Aldehyde oxidase and xanthine dehydrogenase, a/b hammerhead domain	-	ko:K13482
SMa1547	pcm3	28.82	28.39	32.89	63.5	59.8	60.05	30.0333	61.1167	1.025	1.71068e-05	0.000104937	O	Catalyzes the methyl esterification of L-isoaspartyl residues in peptides and proteins that result from spontaneous decomposition of normal L-aspartyl and L-asparaginyl residues. It plays a role in the repair and or degradation of damaged proteins	-	ko:K00573
SMa1789		20.39	20.28	19.66	51.13	39.17	44.01	20.11	44.77	1.1546	1.82165e-05	0.000111087	T	AAA ATPase domain	-	-
SMa1406	ttuD	2.94	3.83	2.08	9.62	11.13	12.52	2.95	11.09	1.9105	1.83856e-05	0.000111789	G	MOFRL family	-	ko:K11529
SMa2347		5.1	6.53	8.89	17.87	22.72	17.6	6.84	19.3967	1.5037	1.8957e-05	0.00011515	Q	Methyltransferase domain	-	ko:K15256
SMc02401		14.51	19.38	22.31	60.2	39.17	37.55	18.7333	45.64	1.2847	1.94717e-05	0.000118046	S	BA14K-like protein	-	-
SMb20277		30.59	24.34	34.22	68.72	64.44	54.18	29.7167	62.4467	1.0714	2.07938e-05	0.000125693	H	Aminotransferase class-III	-	-
SMc00766		13.33	16.45	29.11	57.18	50.53	39.51	19.63	49.0733	1.3219	2.19206e-05	0.000131736	K	Transcriptional regulator	-	-
SMa0981	vapC	20.78	24.34	22.12	51.95	44.04	47.92	22.4133	47.97	1.0978	2.42799e-05	0.000144378	S	Toxic component of a toxin-antitoxin (TA) module. An RNase	-	ko:K18828
SMb21286	xdhA	74.7	53.63	83.94	105.28	207.46	163.12	70.7567	158.62	1.1646	2.4924e-05	0.000148067	F	Xanthine dehydrogenase	-	ko:K13481
SMa0142		8.43	7.44	10.21	23.92	22.72	20.73	8.69333	22.4567	1.3692	2.49554e-05	0.000148111	O	Subtilase family	-	-
SMb21530	xsc	5.88	5.18	3.97	14.29	18.54	13.3	5.01	15.3767	1.6179	2.71966e-05	0.000160289	EH	Thiamine pyrophosphate enzyme, central domain	-	ko:K03852
SMa0220		17.84	22.31	24.77	52.23	44.51	43.81	21.64	46.85	1.1143	2.81197e-05	0.000165313	C	Aldehyde dehydrogenase family	-	ko:K00128
SMb20536		15.49	15.1	17.01	34.36	44.51	29.73	15.8667	36.2	1.19	2.86335e-05	0.000167857	S	protein conserved in bacteria	-	-
SMa1523	nuoG2	10.98	10.37	13.99	29.14	25.5	31.1	11.78	28.58	1.2787	2.87375e-05	0.000168308	C	Belongs to the complex I 75 kDa subunit family	-	ko:K00336
SMa0956	atrB	16.27	17.8	19.47	39.58	41.26	35.4	17.8467	38.7467	1.1184	3.01748e-05	0.000175732	H	Belongs to the class-III pyridoxal-phosphate-dependent aminotransferase family	-	ko:K01845
SMa0953		9.02	7.21	8.32	20.07	24.11	19.56	8.18333	21.2467	1.3765	3.16312e-05	0.000183697	E	Part of the ABC transporter complex PotABCD involved in spermidine putrescine import. Responsible for energy coupling to the transport system	-	ko:K02052,ko:K11080
SMa2009		16.08	24.34	29.49	67.62	55.63	41.27	23.3033	54.84	1.2347	3.28718e-05	0.000190546	S	Glyoxalase/Bleomycin resistance protein/Dioxygenase superfamily	-	ko:K04750
SMc01659		94.11	87.43	67.11	175.93	148.81	174.86	82.8833	166.533	1.0067	3.36936e-05	0.000194765	P	Periplasmic binding protein	-	ko:K02016
SMb20365	afuA1	21.37	23.43	23.63	47.56	51.46	42.83	22.81	47.2833	1.0517	3.41325e-05	0.000196752	P	ABC-type Fe3 transport system, periplasmic component	-	ko:K02012,ko:K11081
SMc01822		19.02	18.7	24.39	44.53	53.08	37.36	20.7033	44.99	1.1197	3.42394e-05	0.000197186	G	Cupin	-	-
SMb21288	xdhC	22.35	16.67	27.41	43.43	52.39	49.29	22.1433	48.37	1.1272	3.51925e-05	0.00020174	O	Xanthine and CO dehydrogenases maturation factor, XdhC CoxF family	-	ko:K07402
SMb21637	paaD	2.16	5.63	3.59	17.32	15.99	8.41	3.79333	13.9067	1.8742	3.53571e-05	0.000202497	S	Iron-sulfur cluster assembly protein	-	ko:K02612
SMa0005	fdxH	14.7	13.75	16.07	34.64	34.07	30.9	14.84	33.2033	1.1618	3.72619e-05	0.000212817	C	4Fe-4S dicluster domain	-	ko:K00124
SMb21204	ybhR	15.1	13.52	14.56	37.38	29.9	31.49	14.3933	32.9233	1.1937	4.2292e-05	0.000238694	V	ABC-2 family transporter protein	GO:0003674,GO:0005215,GO:0005575,GO:0005623,GO:0005886,GO:0005887,GO:0006810,GO:0006855,GO:0006950,GO:0006974,GO:0008150,GO:0009987,GO:0015562,GO:0015893,GO:0016020,GO:0016021,GO:0022857,GO:0031224,GO:0031226,GO:0033554,GO:0042221,GO:0042493,GO:0044425,GO:0044459,GO:0044464,GO:0050896,GO:0051179,GO:0051234,GO:0051716,GO:0055085,GO:0071944	ko:K01992
SMc00181		29.41	23.43	24.77	47.83	68.61	48.7	25.87	55.0467	1.0894	4.30603e-05	0.000242151	-	-	-	-
SMb21357		13.92	11.94	14.37	49.75	22.95	33.45	13.41	35.3833	1.3998	4.38024e-05	0.000245657	S	Predicted membrane protein (DUF2231)	-	-
SMb21169		36.86	50.25	50.48	112.15	83.91	85.08	45.8633	93.7133	1.0309	4.50459e-05	0.000251271	K	helix_turn_helix, Arsenical Resistance Operon Repressor	-	-
SMa6522	MA20_04240	0.78	0.45	1.32	5.77	5.33	5.67	0.85	5.59	2.7173	4.90054e-05	0.000272136	C	NAD(FAD)-dependent	-	-
SMb20586	pcaR	3.92	4.73	5.86	17.04	13.44	13.3	4.83667	14.5933	1.5932	4.9285e-05	0.0002732	K	Transcriptional regulator	-	ko:K02624,ko:K20539
SMc04404		20	15.55	22.5	39.58	47.98	37.94	19.35	41.8333	1.1123	5.3316e-05	0.000293388	E	efflux protein	-	-
SMb21516		26.08	26.36	22.12	71.2	46.59	48.11	24.8533	55.3	1.1538	5.34127e-05	0.000293463	S	L,D-transpeptidase catalytic domain	-	-
SMc01560		10.98	10.59	15.5	44.26	23.88	27.97	12.3567	32.0367	1.3744	5.45652e-05	0.000299266	S	Protein of unknown function (DUF1428)	-	-
SMa2209		7.45	10.14	12.86	26.11	27.82	21.51	10.15	25.1467	1.3089	5.6553e-05	0.000309349	E	Bacterial extracellular solute-binding protein	-	ko:K02055
SMa1652		4.31	6.99	6.43	17.59	21.09	12.52	5.91	17.0667	1.53	6.12261e-05	0.00033286	E	Hydantoin racemase	-	ko:K16841
SMb21419		14.9	16.45	18.15	34.91	38.25	33.25	16.5	35.47	1.1041	6.70032e-05	0.00036205	K	AraC-like ligand binding domain	-	-
SMc04401		29.21	39.21	42.16	70.65	95.04	61.22	36.86	75.6367	1.037	7.19805e-05	0.000387597	K	helix_turn _helix lactose operon repressor	-	ko:K02529
SMa0226		11.76	11.94	12.48	33.54	26.89	24.25	12.06	28.2267	1.2268	7.40961e-05	0.000396925	G	Glucose / Sorbosone dehydrogenase	-	-
SMb20117		23.92	30.19	31.76	62.95	52.62	58.87	28.6233	58.1467	1.0225	7.70199e-05	0.000412232	M	Glycosyltransferase Family 4	-	ko:K12995
SMc04181		7.06	6.53	7.75	16.22	23.88	16.23	7.11333	18.7767	1.4003	8.50449e-05	0.000450912	-	-	-	-
SMc00881	dgoK	63.72	84.73	129.12	167.13	233.19	178.38	92.5233	192.9	1.06	8.76116e-05	0.000461763	G	2-dehydro-3-deoxygalactonokinase	GO:0003674,GO:0003824,GO:0005975,GO:0006082,GO:0006793,GO:0006796,GO:0008150,GO:0008152,GO:0008671,GO:0009056,GO:0009987,GO:0016052,GO:0016054,GO:0016301,GO:0016310,GO:0016740,GO:0016772,GO:0016773,GO:0019200,GO:0019520,GO:0019583,GO:0019584,GO:0019752,GO:0032787,GO:0034192,GO:0034194,GO:0043436,GO:0044237,GO:0044238,GO:0044248,GO:0044262,GO:0044275,GO:0044281,GO:0044282,GO:0046176,GO:0046395,GO:…	ko:K00883
SMa1386		6.86	6.53	5.1	19.79	15.99	15.06	6.16333	16.9467	1.4592	8.81168e-05	0.000464032	E	FAD dependent oxidoreductase	-	-
SMb20477		11.37	9.46	13.23	25.84	25.03	28.95	11.3533	26.6067	1.2287	8.82689e-05	0.000464046	EP	Binding-protein-dependent transport system inner membrane component	-	ko:K02033
SMb21224	cysC	30.78	24.56	30.06	56.9	53.31	62.59	28.4667	57.6	1.0168	8.89274e-05	0.00046706	P	Belongs to the TRAFAC class translation factor GTPase superfamily. Classic translation factor GTPase family. CysN NodQ subfamily	-	ko:K00955
SMb20888	MA20_32430	20.19	18.93	31.95	49.2	51.92	50.07	23.69	50.3967	1.0891	9.52664e-05	0.000495385	E	Transglutaminase-like	-	-
SMc01626		8.82	9.24	10.96	26.66	25.27	18.78	9.67333	23.57	1.2849	9.68733e-05	0.00050248	G	Binding-protein-dependent transport system inner membrane component	-	ko:K02026
SMc01570		15.29	21.41	24.58	45.36	42.65	42.05	20.4267	43.3533	1.0857	0.000101501	0.000524731	K	transcriptional regulator, lysr family	-	-
SMb20597		5.29	6.76	6.99	18.97	18.31	13.89	6.34667	17.0567	1.4263	0.000104503	0.00053889	S	SURF4 family	-	ko:K15977
SMa1651	nikA	6.67	8.56	11.91	22.54	34.07	16.43	9.04667	24.3467	1.4283	0.000104587	0.00053889	E	Bacterial extracellular solute-binding proteins, family 5 Middle	-	ko:K15584
SMb21635	paaN	11.76	17.13	13.04	40.96	27.35	30.12	13.9767	32.81	1.2311	0.000109148	0.000559607	CI	MaoC like domain	-	ko:K02618
SMb20077		16.27	12.62	14.18	36.01	28.51	32.27	14.3567	32.2633	1.1682	0.000109746	0.000562208	T	Histidine kinase	-	-
SMc00806	MA20_15015	11.18	11.94	10.4	27.21	25.03	24.84	11.1733	25.6933	1.2013	0.000111088	0.000568616	T	Protein of unknown function (DUF1236)	-	-
SMa2000		10.39	7.21	13.42	23.64	32.22	21.12	10.34	25.66	1.3113	0.000117117	0.000595554	G	ABC transporter substrate-binding protein	-	ko:K10439
SMc02222		17.06	15.55	15.5	34.64	41.49	28.56	16.0367	34.8967	1.1217	0.00012156	0.000616127	L	nuclease	-	-
SMb20925		22.55	18.03	27.6	54.98	44.04	44.79	22.7267	47.9367	1.0767	0.000129899	0.000654128	S	Peptidase family M50	-	ko:K06402
SMc01619		6.08	7.89	9.26	20.07	20.86	17.41	7.74333	19.4467	1.3285	0.000131328	0.000660251	IQ	Class II Aldolase and Adducin N-terminal domain	-	-
SMa0620		8.04	7.44	10.59	22.27	21.09	20.15	8.69	21.17	1.2846	0.000135068	0.000677957	S	Predicted integral membrane protein (DUF2189)	-	-
SMa1541	nuoL2	7.25	7.21	7.18	19.52	19.01	16.23	7.21333	18.2533	1.3394	0.000137066	0.000685222	CP	NADH-Ubiquinone oxidoreductase (complex I), chain 5 N-terminus	-	ko:K00341,ko:K05568
SMa0793	ntaB	18.04	29.74	20.61	41.51	60.5	45.77	22.7967	49.26	1.1116	0.000146111	0.000725187	K	Conserved protein domain typically associated with flavoprotein oxygenases, DIM6 NTAB family	-	-
SMa1916		11.37	13.52	11.34	26.11	25.73	29.73	12.0767	27.19	1.1709	0.000157173	0.000775755	P	Di- and tricarboxylate transporters	-	-
SMc01718	merA_1	12.16	11.72	11.91	28.59	28.97	22.88	11.93	26.8133	1.1684	0.000161788	0.000794741	S	SNARE associated Golgi protein	-	-
SMc01165	iolC	52.94	66.25	83.56	116.28	213.95	106.4	67.5833	145.543	1.1067	0.000166997	0.000817745	G	Uncharacterized protein conserved in bacteria (DUF2090)	-	ko:K03338
SMa1493		9.8	6.99	13.04	21.72	27.82	22.49	9.94333	24.01	1.2718	0.000172771	0.00084336	K	Transcriptional regulator	-	-
SMc03085	fdhD	20.39	22.76	26.66	47.01	41.03	58.09	23.27	48.71	1.0657	0.000179842	0.000873076	C	Required for formate dehydrogenase (FDH) activity. Acts as a sulfur carrier protein that transfers sulfur from IscS to the molybdenum cofactor prior to its insertion into FDH	-	ko:K02379
SMa0626		15.69	16.22	16.83	43.16	31.29	31.49	16.2467	35.3133	1.1201	0.000182139	0.000883536	M	Predicted periplasmic protein (DUF2092)	-	-
SMc02851		45.49	48	41.97	113.8	74.41	82.73	45.1533	90.3133	1.0001	0.000200591	0.000968511	K	transcriptional regulator	-	ko:K06075
SMc01622		6.86	8.79	12.48	26.66	23.64	18.78	9.37667	23.0267	1.2962	0.00020384	0.00098191	EH	D-isomer specific 2-hydroxyacid dehydrogenase, catalytic domain	-	ko:K00058
SMc01624		16.67	11.94	14.56	34.09	30.83	29.34	14.39	31.42	1.1266	0.000206578	0.000992021	G	Belongs to the ABC transporter superfamily	-	ko:K10112
SMa1653		2.55	2.03	1.89	6.6	9.74	7.82	2.15667	8.05333	1.9008	0.000209844	0.00100537	S	Flavin reductase like domain	-	-
SMc04267		14.51	16.22	21.55	37.38	40.56	32.27	17.4267	36.7367	1.0759	0.000214982	0.0010292	S	Stf0 sulphotransferase	-	-
SMc03136		16.86	14.2	17.96	33.26	42.19	29.14	16.34	34.8633	1.0933	0.000218964	0.00104745	D	Antitoxin component of a toxin-antitoxin (TA) module	-	-
SMc04335		2.35	3.83	2.27	7.97	11.82	8.8	2.81667	9.53	1.7585	0.000219948	0.00105135	#N/A	#N/A	#N/A	#N/A
SMc02387		8.43	8.34	7.75	21.17	18.08	19.95	8.17333	19.7333	1.2716	0.000223974	0.00106649	S	UPF0060 membrane protein	-	ko:K09771
SMa0576		19.21	24.34	26.47	51.95	44.51	44.4	23.34	46.9533	1.0084	0.000231101	0.00109456	E	Receptor family ligand binding region	-	ko:K01999
SMc02699		12.35	11.72	16.07	26.66	33.84	27.19	13.38	29.23	1.1274	0.000233798	0.00110649	S	small metal-binding protein	-	-
SMb20128		6.47	5.18	10.02	14.84	34.07	14.47	7.22333	21.1267	1.5483	0.000235152	0.00111036	F	Amidohydrolase family	-	ko:K01485
SMb21138	glnQ	1.76	2.48	4.54	8.25	10.66	10.95	2.92667	9.95333	1.7659	0.000237502	0.0011206	E	ATPases associated with a variety of cellular activities	-	ko:K02028,ko:K09972,ko:K10010
SMc01460		10.78	9.01	13.99	23.37	27.82	25.43	11.26	25.54	1.1816	0.000238664	0.00112438	S	Antioxidant protein with alkyl hydroperoxidase activity. Required for the reduction of the AhpC active site cysteine residues and for the regeneration of the AhpC enzyme activity	-	-
SMb20838		22.35	21.86	19.09	62.95	44.51	33.25	21.1	46.9033	1.1524	0.000239002	0.00112512	Q	COG2931 RTX toxins and related Ca2 -binding proteins	-	-
SMb21284	pucL	141.36	88.33	124.58	166.58	350.02	233.14	118.09	249.913	1.0815	0.000254621	0.00119232	G	OHCU decarboxylase	-	ko:K00365,ko:K01452
SMa1604		3.33	1.58	3.4	10.17	9.27	8.61	2.77	9.35	1.7551	0.000315633	0.00144642	C	NADH:flavin oxidoreductase / NADH oxidase family	-	-
SMc01618		15.29	12.84	13.23	28.59	29.44	29.92	13.7867	29.3167	1.0884	0.000338113	0.00153697	G	FGGY family of carbohydrate kinases, C-terminal domain	-	ko:K00854
SMa0846		4.9	10.59	6.62	2.2	4.87	2.54	7.37	3.20333	-1.2021	0.000360977	0.00163373	#N/A	#N/A	#N/A	#N/A
SMa2197		11.76	16.45	15.12	31.61	31.06	28.75	14.4433	30.4733	1.0771	0.000367807	0.00166101	E	acid ABC transporter	-	ko:K02029
SMb20144		17.65	15.77	28.74	43.98	62.82	32.47	20.72	46.4233	1.1638	0.000465758	0.00206141	E	ABC-type dipeptide transport system, periplasmic component	-	ko:K02035
SMa0950	attC	3.73	3.15	4.35	11	11.82	9.78	3.74333	10.8667	1.5375	0.000467951	0.00206964	E	ABC transporter substrate-binding protein	-	ko:K11077
SMc01505		1.96	4.06	5.86	15.12	8.81	12.91	3.96	12.28	1.6327	0.000468747	0.00207169	-	-	-	-
SMb21654	lacG	6.67	7.89	5.86	3.3	2.78	3.52	6.80667	3.2	-1.0889	0.000471619	0.0020829	G	Binding-protein-dependent transport system inner membrane component	-	ko:K10190
SMc01651		14.7	13.97	17.96	35.19	34.07	27.58	15.5433	32.28	1.0543	0.000484364	0.00213312	K	transcriptional regulator	-	-
SMc02568	hisE	6.47	5.86	7.18	3.57	3.25	2.54	6.50333	3.12	-1.0596	0.000523476	0.00228593	E	Phosphoribosyl-ATP	-	ko:K01523
SMa0594		8.43	6.31	6.24	17.04	19.93	14.47	6.99333	17.1467	1.2939	0.000562656	0.00243818	K	sequence-specific DNA binding	-	-
SMb20147	MA20_26935	8.04	8.11	11.53	21.44	22.25	19.17	9.22667	20.9533	1.1833	0.000599508	0.00258837	C	alcohol dehydrogenase	-	-
SMa1676		6.08	7.21	7.75	16.49	18.54	15.26	7.01333	16.7633	1.2571	0.000599816	0.00258837	S	AI-2E family transporter	-	-
SMc01590		26.66	31.55	31.19	81.37	46.59	55.35	29.8	61.1033	1.0359	0.000603857	0.00260039	T	protein with a bacterial SH3 domain	-	-
SMc04180		16.27	15.1	16.26	30.51	30.6	35.6	15.8767	32.2367	1.0218	0.000678746	0.00289282	-	-	-	-
SMc01508		7.45	5.18	8.51	19.24	16.23	15.84	7.04667	17.1033	1.2793	0.000731083	0.0030918	-	-	-	-
SMa1526	nuoE2	1.57	1.13	1.32	8.52	5.79	3.52	1.34	5.94333	2.149	0.000738178	0.00310775	C	oxidoreductase	-	ko:K00334
SMa2303		9.02	9.46	8.51	16.22	25.96	19.36	8.99667	20.5133	1.1891	0.000772008	0.00323483	GK	ROK family	-	-
SMa1519	nuoI2	4.31	4.06	2.84	13.74	9.04	9.78	3.73667	10.8533	1.5383	0.000806158	0.00336432	C	NDH-1 shuttles electrons from NADH, via FMN and iron- sulfur (Fe-S) centers, to quinones in the respiratory chain. The immediate electron acceptor for the enzyme in this species is believed to be ubiquinone. Couples the redox reaction to proton translocation (for every two electrons transferred, four hydrogen ions are translocated across the cytoplasmic membrane), and thus conserves the redox ene…	-	ko:K00338
SMa0013		8.82	6.08	11.15	21.99	22.95	16.23	8.68333	20.39	1.2315	0.0008426	0.00349761	S	Sel1 repeat	-	ko:K07126
SMa0347		14.51	11.72	11.72	24.19	26.43	29.53	12.65	26.7167	1.0786	0.000856937	0.00355237	K	Bacterial regulatory helix-turn-helix protein, lysR family	-	-
SMa1535	nuoN2	6.27	4.06	6.43	18.97	13.44	11.54	5.58667	14.65	1.3908	0.000890353	0.00367618	C	NDH-1 shuttles electrons from NADH, via FMN and iron- sulfur (Fe-S) centers, to quinones in the respiratory chain. The immediate electron acceptor for the enzyme in this species is believed to be ubiquinone. Couples the redox reaction to proton translocation (for every two electrons transferred, four hydrogen ions are translocated across the cytoplasmic membrane), and thus conserves the redox ene…	-	ko:K00343
SMc00597		4.51	5.41	5.67	14.57	12.29	12.71	5.19667	13.19	1.3438	0.000919655	0.00378459	S	Conserved protein containing a Zn-ribbon-like motif, possibly RNA-binding	-	-
SMa0952		1.76	3.61	3.59	6.6	12.05	9.19	2.98667	9.28	1.6356	0.00092724	0.00381328	E	Binding-protein-dependent transport system inner membrane component	-	ko:K11079
SMc03949	ntrP	7.84	7.44	9.07	17.04	21.79	16.62	8.11667	18.4833	1.1873	0.000940234	0.00386416	S	SpoVT / AbrB like domain	-	ko:K18829
SMb20764	phnL	6.08	5.86	7.18	17.32	14.37	14.47	6.37333	15.3867	1.2716	0.000945123	0.00388169	P	ABC transporter	GO:0005575,GO:0006793,GO:0008150,GO:0008152,GO:0009056,GO:0009987,GO:0019634,GO:0019637,GO:0019700,GO:0032991,GO:0044237,GO:0046434,GO:0061694,GO:0061695,GO:0071704,GO:1901575,GO:1902494,GO:1990234	ko:K05780
SMa0198		4.9	3.15	3.4	12.37	9.97	9.97	3.81667	10.77	1.4966	0.0009797	0.00401309	G	Belongs to the binding-protein-dependent transport system permease family	-	ko:K10440
SMb20136		7.65	10.14	10.21	15.67	29.9	19.17	9.33333	21.58	1.2092	0.00103217	0.00420583	H	Belongs to the UbiD family	-	ko:K03182,ko:K16874
SMc04242	zur	3.33	4.73	6.05	11.55	12.98	12.13	4.70333	12.22	1.3775	0.00115561	0.00464486	P	Ferric uptake regulator family	-	ko:K09823
SMb21225	cysQ	12.35	10.82	10.59	23.09	22.95	25.04	11.2533	23.6933	1.0741	0.00119547	0.0047865	P	3'(2'),5'-bisphosphate nucleotidase	-	ko:K01082
SMc04291	sndH	12.16	10.59	11.53	22.82	22.25	27.38	11.4267	24.15	1.0796	0.0011997	0.00480036	G	Glucose / Sorbosone dehydrogenase	-	-
SMc00694		15.69	13.07	13.04	29.41	31.76	24.25	13.9333	28.4733	1.0311	0.00127875	0.0050937	S	ParE toxin of type II toxin-antitoxin system, parDE	-	ko:K19092
SMb20989		7.65	10.82	10.78	22.82	19.93	20.73	9.75	21.16	1.1179	0.00128747	0.00512512	O	SPFH domain / Band 7 family	-	-
SMc02314		11.57	13.29	14.75	26.66	31.06	23.27	13.2033	26.9967	1.0319	0.00129785	0.00515986	T	Catalyzes the ATP- as well as the pyrophosphate- dependent phosphorylation of a specific serine residue in HPr, a phosphocarrier protein of the phosphoenolpyruvate-dependent sugar phosphotransferase system (PTS). HprK P also catalyzes the pyrophosphate-producing, inorganic phosphate-dependent dephosphorylation (phosphorolysis) of seryl-phosphorylated HPr (P- Ser-HPr). The two antagonistic activit…	-	-
SMa2023		6.67	8.56	11.53	25.84	22.72	14.28	8.92	20.9467	1.2316	0.00134124	0.00532214	S	Serine hydrolase	-	-
SMa1413		6.27	5.63	7.94	12.09	18.31	16.62	6.61333	15.6733	1.2449	0.0014289	0.00564473	K	Bacterial antitoxin of ParD toxin-antitoxin type II system and RHH	-	ko:K07746
SMc02319		14.12	12.17	17.2	26.39	35.23	26.6	14.4967	29.4067	1.0204	0.00144446	0.00569867	-	-	-	-
SMa1759		5.1	4.06	3.97	10.45	13.21	10.56	4.37667	11.4067	1.382	0.00145831	0.00574221	K	FCD	-	-
SMa0958	atrC	13.72	14.42	18.72	25.01	39.64	30.51	15.62	31.72	1.022	0.00146754	0.00576804	EH	Belongs to the TPP enzyme family	-	ko:K01652
SMc01621	fucA	5.49	6.99	6.81	14.84	16.69	13.5	6.43	15.01	1.223	0.00154484	0.00605654	G	Class II Aldolase and Adducin N-terminal domain	-	ko:K01628
SMb20355		8.23	10.59	11.34	24.46	21.09	19.17	10.0533	21.5733	1.1016	0.001573	0.00615143	U	Protein of unknown function (DUF3365)	-	-
SMb20276		6.67	7.21	8.13	17.87	15.53	16.43	7.33667	16.61	1.1789	0.00159241	0.0062156	K	SIS domain	-	-
SMc01975		17.25	21.18	39.51	52.5	62.59	45.96	25.98	53.6833	1.0471	0.00166326	0.00645565	K	FCD	-	-
SMc02389		0.78	2.93	1.89	7.15	7.65	5.09	1.86667	6.63	1.8285	0.00168611	0.00652804	-	-	-	-
SMb20483	rbtR	15.29	12.39	11.53	24.46	31.29	24.64	13.07	26.7967	1.0358	0.00170267	0.00658802	K	helix_turn _helix lactose operon repressor	-	ko:K02529,ko:K03435
SMb20129		12.16	15.55	15.12	28.31	32.92	24.45	14.2767	28.56	1.0003	0.00172963	0.00667159	K	Transcriptional regulator	-	-
SMa1688		2.55	2.03	2.08	7.42	6.95	6.85	2.22	7.07333	1.6718	0.00173419	0.00668503	T	response regulator	-	-
SMa0063		8.63	21.41	21.93	42.33	51.92	25.43	17.3233	39.8933	1.2034	0.00180394	0.00691101	K	FCD	-	-
SMb20145		7.45	9.01	18.72	25.01	37.32	20.54	11.7267	27.6233	1.2361	0.00182305	0.00696379	G	BNR repeat-like domain	-	-
SMc02173	fucU	12.94	8.11	9.07	20.62	25.73	19.17	10.04	21.84	1.1212	0.00200234	0.00761478	G	RbsD / FucU transport protein family	-	ko:K02431
SMc04388	MA20_09775	53.13	52.28	125.91	221.83	325.45	187.57	77.1067	244.95	1.6676	0.00208989	0.00792346	E	Belongs to the class-III pyridoxal-phosphate-dependent aminotransferase family	-	ko:K00822
SMb20673		15.88	28.39	29.49	58.28	59.11	34.23	24.5867	50.54	1.0395	0.00215482	0.00814977	G	ATPases associated with a variety of cellular activities	-	ko:K10441
SMb20669	MA20_16445	5.69	7.21	9.45	16.49	19.47	14.47	7.45	16.81	1.174	0.00227849	0.00856537	G	Belongs to the hyi family	-	ko:K01816,ko:K22131
SMa1521		4.31	3.61	2.84	7.97	11.13	9.78	3.58667	9.62667	1.4244	0.0024896	0.00928035	S	Domain in cystathionine beta-synthase and other proteins.	-	-
SMb21046		5.69	5.63	6.99	2.47	2.09	4.5	6.10333	3.02	-1.015	0.00250319	0.00931985	L	Transposase and inactivated	-	-
SMb20765		8.23	8.34	6.62	18.97	17.15	15.06	7.73	17.06	1.1421	0.00258535	0.00958553	S	#NAME?	-	ko:K00638
SMc03092		8.43	9.69	12.29	18.97	24.8	19.75	10.1367	21.1733	1.0627	0.0026354	0.00975365	K	Transcriptional	-	-
SMc01824		5.88	8.34	9.45	16.49	17.62	17.6	7.89	17.2367	1.1274	0.00268494	0.00991337	K	Acetyltransferase (GNAT) domain	-	-
SMb20574	treY	5.49	8.11	10.78	23.37	15.3	16.82	8.12667	18.4967	1.1865	0.00288522	0.0106133	G	Alpha amylase, catalytic domain	-	ko:K06044
SMa1754		5.88	5.18	5.29	15.12	13.21	10.56	5.45	12.9633	1.2501	0.00308258	0.0112545	E	Part of the ABC transporter complex PotABCD involved in spermidine putrescine import. Responsible for energy coupling to the transport system	-	ko:K02052
SMa0062		10.2	9.69	9.26	23.64	16.92	20.54	9.71667	20.3667	1.0677	0.00345729	0.0124977	K	FCD	-	-
SMb20608		9.61	16.67	10.4	23.37	24.8	26.99	12.2267	25.0533	1.035	0.00346425	0.0125156	K	helix_turn_helix, Arsenical Resistance Operon Repressor	-	-
SMc01522		9.61	17.35	19.28	35.46	39.41	22.1	15.4133	32.3233	1.0684	0.00363668	0.0130626	K	Bacterial regulatory proteins, tetR family	-	-
SMa1440	kdgD	6.27	11.04	16.07	21.17	34.31	19.36	11.1267	24.9467	1.1648	0.00366068	0.0131412	EM	Belongs to the DapA family	-	ko:K01707
SMc01530		4.12	6.31	4.16	2.2	2.55	2.35	4.86333	2.36667	-1.0391	0.00374917	0.0134278	L	Transposase	-	ko:K07493
SMa0663		3.92	2.48	4.35	1.92	0.23	1.76	3.58333	1.30333	-1.4591	0.00383476	0.0137107	-	-	-	-
SMb20021		8.43	10.37	13.04	18.42	29.9	18.39	10.6133	22.2367	1.0671	0.00426331	0.0150438	K	helix_turn_helix ASNC type	-	ko:K05800
SMc01627		16.47	14.2	16.64	30.79	42.42	21.51	15.77	31.5733	1.0015	0.00453403	0.0159178	G	Binding-protein-dependent transport system inner membrane component	-	ko:K02025
SMc00812		10	6.99	9.07	23.92	18.31	14.28	8.68667	18.8367	1.1167	0.00475474	0.0166456	E	Glyoxalase/Bleomycin resistance protein/Dioxygenase superfamily	-	-
SMc00147		35.88	28.39	22.87	106.38	49.84	83.71	29.0467	79.9767	1.4612	0.00483761	0.0168787	S	Serine aminopeptidase, S33	-	-
SMb21569		10.59	10.59	6.62	15.12	31.06	16.23	9.26667	20.8033	1.1667	0.00512914	0.0177464	S	Dimethlysulfonioproprionate lyase	-	-
SMb20206	pqqC	4.51	7.89	14.93	24.74	26.19	13.89	9.11	21.6067	1.246	0.00530251	0.018303	H	Ring cyclization and eight-electron oxidation of 3a-(2- amino-2-carboxyethyl)-4,5-dioxo-4,5,6,7,8,9-hexahydroquinoline- 7,9-dicarboxylic-acid to PQQ	-	ko:K06136,ko:K06137,ko:K06138
SMb20392	nanR	10	10.59	12.48	22.54	27.58	16.82	11.0233	22.3133	1.0173	0.00530475	0.018303	K	FCD	-	-
SMa1898		6.08	4.73	7.37	14.57	12.05	13.89	6.06	13.5033	1.1559	0.00599182	0.0204017	O	OsmC-like protein	-	ko:K06889,ko:K07397
SMc01985	coxP	7.06	7.21	10.78	14.29	17.85	20.54	8.35	17.56	1.0724	0.00605594	0.0205749	C	oxidase, subunit	-	ko:K02276,ko:K02299
SMb20681	gcl	5.29	3.83	3.59	8.25	10.89	11.54	4.23667	10.2267	1.2713	0.00651967	0.0219465	S	Thiamine pyrophosphate enzyme, central domain	-	ko:K01608
SMa0791		14.51	35.6	39.51	78.34	94.34	66.3	29.8733	79.66	1.415	0.00751861	0.024995	S	Amino acid synthesis	-	-
SMa1208	fixS	2.74	2.25	1.89	0.55	0.7	0.98	2.29333	0.743333	-1.6254	0.00842359	0.0276807	P	cytochrome oxidase maturation protein	-	-
SMb21137	glnM	1.57	1.8	3.97	6.87	5.33	8.61	2.44667	6.93667	1.5034	0.00877474	0.0286528	E	ABC transporter permease	-	ko:K02029
SMa1397	MA20_16880	1.18	0.68	1.13	2.47	5.33	3.72	0.996667	3.84	1.9459	0.00906414	0.0295047	EM	Protein of unknown function (DUF993)	-	-
SMb20344		38.23	33.12	93.2	150.36	167.36	135.54	54.85	151.087	1.4618	0.00977847	0.0314023	K	AraC-type transcriptional regulator N-terminus	-	-
SMc02642		8.04	12.17	10.78	28.31	16.23	18.58	10.33	21.04	1.0263	0.0102016	0.0325786	-	-	-	-
SMa0171		8.43	6.31	6.05	17.32	14.37	12.32	6.93	14.67	1.0819	0.0106494	0.0337803	S	Serine aminopeptidase, S33	-	ko:K06889
SMb20746	gstI	8.43	8.56	6.81	15.12	21.33	12.71	7.93333	16.3867	1.0465	0.0111357	0.0350542	S	Protein of unknown function (DUF2735)	-	-
SMb20254		2.55	2.48	3.97	9.62	6.95	6.45	3	7.67333	1.3549	0.0116518	0.0364205	-	-	-	-
SMa1639		4.12	4.51	3.78	8.8	11.59	8.21	4.13667	9.53333	1.2045	0.0119337	0.0372083	L	Metal-sensitive transcriptional repressor	-	ko:K07807
SMa0674		2.55	2.93	3.02	1.1	1.16	1.37	2.83333	1.21	-1.2275	0.0120697	0.037569	S	VIT family	-	-
SMa0622	fixS	1.37	1.8	1.89	5.22	5.33	4.5	1.68667	5.01667	1.5726	0.012103	0.0376416	P	cytochrome oxidase maturation protein	-	-
SMa2269		4.31	4.73	3.4	0.55	3.25	2.35	4.14667	2.05	-1.0163	0.0124733	0.0386772	L	DNA primase small subunit	-	-
SMb21315	aprE	5.88	6.76	6.81	14.02	15.3	11.15	6.48333	13.49	1.0571	0.0126262	0.0390732	M	type I secretion membrane fusion protein	-	ko:K02022
SMb21538	phnA	4.12	6.31	6.81	11.82	11.59	13.3	5.74667	12.2367	1.0904	0.0128563	0.039726	S	Type I phosphodiesterase / nucleotide pyrophosphatase	-	ko:K19670
SMa1606		4.9	2.93	4.35	9.62	8.58	9.97	4.06	9.39	1.2096	0.0133608	0.0410401	GM	epimerase	-	-
SMc02518	MA20_44790	24.51	26.14	47.45	64.6	149.51	61.02	32.7	91.71	1.4878	0.0142222	0.0434285	G	Belongs to the ABC transporter superfamily	-	ko:K17325
SMb20349		8.04	6.31	8.7	14.02	33.15	8.02	7.68333	18.3967	1.2596	0.0142816	0.0435671	G	Periplasmic binding protein-like domain	-	ko:K17202
SMa1478		7.45	5.63	6.81	11.27	15.76	13.89	6.63	13.64	1.0408	0.0144594	0.0440229	H	Trimethylamine methyltransferase (MTTB)	-	ko:K14083
SMc02517	MA20_44785	25.1	31.55	52.18	73.12	148.81	64.94	36.2767	95.6233	1.3983	0.0146503	0.044495	P	ABC-type sugar transport systems, permease components	-	ko:K17322
SMa2165		5.69	4.51	6.24	13.47	10.2	11.54	5.48	11.7367	1.0988	0.014946	0.0452606	IQ	Enoyl-(Acyl carrier protein) reductase	-	-
SMb21218		6.86	4.96	8.32	14.02	16.92	11.15	6.71333	14.03	1.0634	0.0150126	0.0454289	M	sugar isomerase	-	-
SMc04456	csaA	10.59	9.01	5.86	17.32	18.08	15.65	8.48667	17.0167	1.0037	0.0153181	0.0461846	J	tRNA-binding protein	GO:0000049,GO:0003674,GO:0003676,GO:0003723,GO:0005488,GO:0005575,GO:0005622,GO:0005623,GO:0005737,GO:0006082,GO:0006139,GO:0006399,GO:0006412,GO:0006418,GO:0006518,GO:0006520,GO:0006725,GO:0006807,GO:0008150,GO:0008152,GO:0009058,GO:0009059,GO:0009987,GO:0010467,GO:0016070,GO:0017101,GO:0017102,GO:0019538,GO:0019752,GO:0032991,GO:0034641,GO:0034645,GO:0034660,GO:0043038,GO:0043039,GO:0043043,GO:…	ko:K06878
SMa0224		2.74	3.15	3.4	7.97	8.11	6.45	3.09667	7.51	1.2781	0.0153738	0.04633	EGP	Major facilitator superfamily	-	-
SMa1410	dkgB	4.9	3.15	5.29	7.97	11.82	10.17	4.44667	9.98667	1.1673	0.0158155	0.0474772	S	Aldo/keto reductase family	-	ko:K06222
SMb20031		0.98	0.9	1.51	5.22	3.48	2.93	1.13	3.87667	1.7785	0.0159586	0.0478144	S	amine dehydrogenase activity	-	-
SMa2027		7.84	5.86	6.62	14.29	13.21	13.69	6.77333	13.73	1.0194	0.0164099	0.0488603	K	Transcriptional regulator	-	-

## Sheet: 10 dpi
Table S2: Annotated list of rhizobial genes that are differentially expressed in nad1-1 nodules relative to wild type nodules.
We considered rhizobial genes to be differentially expressed if the log2-fold change relative to wild type nodules was greater than 1 and if the adjusted P-Value was below 0.05.
Table legend: 'NA' means data not available
Gene ID	Gene Name	WT-1 (CPM)	WT-2 (CPM)	WT-3 (CPM)	nad1-1-1 (CPM)	nad1-1-2 (CPM)	nad1-1-3(CPM)	WT_mean	nad1-1_mean	log2(fc)	PValue	FDR	COG_category	Description	GOs	KEGG_ko
SMc02365	dop	205.53	177.36	169.8	5217.37	5762.84	5613.95	184.23	5531.39	4.9081	0	0	O	Belongs to the peptidase S1C family	GO:0003674,GO:0003824,GO:0004175,GO:0004252,GO:0005575,GO:0005623,GO:0006508,GO:0006807,GO:0008150,GO:0008152,GO:0008233,GO:0008236,GO:0016787,GO:0017171,GO:0019538,GO:0030288,GO:0030313,GO:0031975,GO:0042597,GO:0043170,GO:0044238,GO:0044464,GO:0070011,GO:0071704,GO:0140096,GO:1901564	ko:K04771
SMb20020		39.58	50.26	51.65	1249.26	1152.02	1180.4	47.1633	1193.89	4.6619	1.83e-227	5.68e-224	C	Transketolase, pyrimidine binding domain	-	ko:K11381
SMc00561	dnaB	2076.37	2780.03	2644.63	239.32	243.21	284.9	2500.34	255.81	-3.289	1.11e-218	2.3e-215	L	it exhibits DNA-dependent ATPase activity and contains distinct active sites for ATP binding, DNA binding, and interaction with DnaC protein, primase, and other prepriming proteins	-	ko:K02314
SMc04350	macA	100.56	103.65	86.04	1444.82	1672.06	1587.04	96.75	1567.97	4.0185	2.3e-217	3.57e-214	M	Belongs to the membrane fusion protein (MFP) (TC 8.A.1) family	-	ko:K02005,ko:K13888
SMb20428	ehuB	36.98	39.59	36.8	625.4	678.5	689.04	37.79	664.313	4.1358	9.84e-210	1.22e-206	ET	Bacterial periplasmic substrate-binding proteins	-	ko:K02030
SMc05008		253.16	232.96	225.46	2636.76	2968.25	2830.82	237.193	2811.94	3.5674	2.22e-201	2.3e-198	#N/A	#N/A	#N/A	#N/A
SMa0822	fixA	31355.6	29290.5	31470.3	2907.06	4316.95	3122.63	30705.4	3448.88	-3.1543	1.52e-198	1.35e-195	C	Electron transfer flavoprotein domain	GO:0003674,GO:0003824,GO:0005575,GO:0005622,GO:0005623,GO:0005737,GO:0005829,GO:0006091,GO:0008150,GO:0008152,GO:0009055,GO:0009987,GO:0016491,GO:0022900,GO:0044237,GO:0044424,GO:0044444,GO:0044464,GO:0055114	ko:K03521
SMc01513	hmuS	58.13	57.17	54.32	754.74	749.43	753.04	56.54	752.403	3.7342	2.76e-194	2.15e-191	P	Haem utilisation ChuX/HutX	-	ko:K07225
SMa0811	fdxN	1183.64	1195.14	1128.64	247.84	288.35	276.12	1169.14	270.77	-2.1103	3.68e-191	2.54e-188	C	4Fe-4S binding domain	-	-
SMc03846	acnA	9501.83	11460.6	11167.7	2197.24	2069.11	2006.24	10710	2090.86	-2.3568	1.51e-190	9.39e-188	C	Catalyzes the isomerization of citrate to isocitrate via cis-aconitate	GO:0003674,GO:0003676,GO:0003723,GO:0003729,GO:0003730,GO:0003824,GO:0003994,GO:0005488,GO:0006082,GO:0006091,GO:0006099,GO:0006101,GO:0006629,GO:0006631,GO:0008150,GO:0008152,GO:0009060,GO:0009987,GO:0015980,GO:0016829,GO:0016835,GO:0016836,GO:0016999,GO:0017144,GO:0019541,GO:0019679,GO:0019752,GO:0032787,GO:0043436,GO:0044237,GO:0044238,GO:0044255,GO:0044281,GO:0045333,GO:0046459,GO:0047456,GO:…	ko:K01681
SMa0825	nifH	41751	38632.7	42781.4	3253.26	5242.34	4166.22	41055.1	4220.61	-3.282	1.47e-189	8.34e-187	D	The key enzymatic reactions in nitrogen fixation are catalyzed by the nitrogenase complex, which has 2 components the iron protein and the molybdenum-iron protein	-	ko:K02588
SMa0810	fixU	1459.37	1489.7	1457.79	333.81	379.55	379.03	1468.95	364.13	-2.0123	6.13e-185	3.18e-182	Q	NifT/FixU protein	-	ko:K02593
SMc01629	eryD	16.22	16.54	16.59	357.43	386.92	432.37	16.45	392.24	4.5756	3.28e-180	1.57e-177	K	Putative sugar-binding domain	-	-
SMa0814	nifB	12154.3	11476	11224.4	3049.18	3466.18	2992.1	11618.2	3169.15	-1.8742	5.06e-179	2.25e-176	C	cofactor biosynthesis protein NifB	-	ko:K02585
SMb21456		15.7	17.58	19.67	462.37	435.29	394.09	17.65	430.583	4.6086	2.32e-176	9.61e-174	S	Evidence 4 Homologs of previously reported genes of	-	-
SMb20204	pqqA	30.36	25.78	25.96	474.38	479.05	441.79	27.3667	465.073	4.087	3.51e-173	1.37e-170	S	Required for coenzyme pyrroloquinoline quinone (PQQ) biosynthesis. PQQ is probably formed by cross-linking a specific glutamate to a specific tyrosine residue and excising these residues from the peptide	-	-
SMc00189	petC	6601.37	6487.6	6977.47	1888.6	1973.3	1833.04	6688.81	1898.31	-1.817	1.32e-172	4.84e-170	C	Cytochrome c1	-	ko:K00413
SMc00187	petA	5076.34	5332.56	5860.48	1280.24	1351.46	1218.05	5423.13	1283.25	-2.0793	7.35e-169	2.54e-166	C	Component of the ubiquinol-cytochrome c reductase complex (complex III or cytochrome b-c1 complex), which is a respiratory chain that generates an electrochemical potential coupled to ATP synthesis	-	ko:K00411
SMb20508	araF	1654.4	1668.75	1943.9	289.66	310	356.44	1755.68	318.7	-2.4618	1.19e-168	3.88e-166	G	L-arabinose-binding periplasmic protein	GO:0003674,GO:0003824,GO:0005215,GO:0005488,GO:0005575,GO:0005623,GO:0006810,GO:0008150,GO:0008643,GO:0015144,GO:0015145,GO:0015399,GO:0015405,GO:0015407,GO:0015749,GO:0016462,GO:0016787,GO:0016817,GO:0016818,GO:0016887,GO:0017111,GO:0022804,GO:0022857,GO:0030246,GO:0030288,GO:0030313,GO:0031975,GO:0034219,GO:0036094,GO:0042597,GO:0042623,GO:0042626,GO:0043211,GO:0043492,GO:0044464,GO:0048029,GO:…	ko:K10537
SMc00188	petB	11938	11944.9	13390.5	3287.72	3310.49	3129.53	12424.5	3242.58	-1.938	1.22e-167	3.79e-165	C	Component of the ubiquinol-cytochrome c reductase complex (complex III or cytochrome b-c1 complex), which is a respiratory chain that generates an electrochemical potential coupled to ATP synthesis	-	ko:K00410,ko:K00412
SMa0815	nifA	24712.2	25753.8	24950.3	6563.05	7705.28	6722.81	25138.7	6997.05	-1.8451	2.01e-167	5.96e-165	KT	Sigma-54 interaction domain	-	ko:K02584
SMa0819	fixB	21783.6	20485.5	21892	2153.86	3445.91	2566.63	21387	2722.13	-2.9739	6.03e-164	1.71e-161	C	Electron transfer flavoprotein FAD-binding domain	GO:0000166,GO:0003674,GO:0003824,GO:0005488,GO:0006082,GO:0006091,GO:0006629,GO:0006631,GO:0006635,GO:0008150,GO:0008152,GO:0009055,GO:0009056,GO:0009062,GO:0009987,GO:0016042,GO:0016054,GO:0016491,GO:0019395,GO:0019752,GO:0022900,GO:0030258,GO:0032787,GO:0033539,GO:0034440,GO:0036094,GO:0043167,GO:0043168,GO:0043436,GO:0044237,GO:0044238,GO:0044242,GO:0044248,GO:0044255,GO:0044281,GO:0044282,GO:…	ko:K03522
SMc01586		205.53	180.61	173.14	2338.19	2053.45	2508.27	186.427	2299.97	3.6249	7.82e-162	2.12e-159	S	BA14K-like protein	-	-
SMa0817	fixC	15314.9	14824.7	15884	1908.74	2895.01	2411	15341.2	2404.92	-2.6734	2.29e-158	5.93e-156	C	FAD dependent oxidoreductase	-	ko:K00313
SMa0827	nifD	31231	30183.5	32281	3257.13	5267.21	4223.95	31231.8	4249.43	-2.8777	1.57e-155	3.91e-153	C	protein alpha chain	-	ko:K02586
SMa0816	fixX	2147.08	2182.72	2130.96	297.41	447.26	344.52	2153.59	363.063	-2.5684	3.54e-153	8.48e-151	C	Could be a 3Fe-4S cluster-containing protein	-	ko:K03855
SMc01557		91.87	115.63	80.01	1518.01	1384.63	1490.4	95.8367	1464.35	3.9335	1.15e-151	2.66e-149	-	-	-	-
SMc03900	ndvA	152.72	133.73	110.92	1688.01	1613.56	1853.12	132.457	1718.23	3.6973	1.57e-150	3.49e-148	V	Involved in beta-(1-- 2)glucan export. Transmembrane domains (TMD) form a pore in the inner membrane and the ATP- binding domain (NBD) is responsible for energy generation	GO:0003674,GO:0003824,GO:0005215,GO:0005319,GO:0006810,GO:0006869,GO:0008150,GO:0010876,GO:0015399,GO:0015405,GO:0016462,GO:0016787,GO:0016817,GO:0016818,GO:0016887,GO:0017111,GO:0022804,GO:0022857,GO:0033036,GO:0034040,GO:0042623,GO:0042626,GO:0043492,GO:0051179,GO:0051234,GO:0055085,GO:0071702	ko:K06147
SMc04351	macB	65.53	53.78	54.99	653.28	697.84	692.8	58.1	681.307	3.5517	4.27e-146	9.16e-144	V	Non-canonical ABC transporter that contains transmembrane domains (TMD), which form a pore in the inner membrane, and an ATP-binding domain (NBD), which is responsible for energy generation. Confers resistance against macrolides	-	ko:K05685,ko:K09810
SMb20507	araG	653.71	684.82	789.04	116.56	122.53	146.84	709.19	128.643	-2.4628	3.37e-143	6.99e-141	P	Part of the ABC transporter complex AraFGH involved in arabinose import. Responsible for energy coupling to the transport system	-	ko:K10539
SMa5036	antA	1522.44	1459.88	1471.98	196.33	297.1	284.27	1484.77	259.233	-2.5179	2.38e-142	4.78e-140	P	Phenylpropionate dioxygenase and related ring-hydroxylating dioxygenases, large terminal subunit	-	ko:K00479
SMc01450	MA20_02250	4386.56	5074.34	5226.24	1205.5	1326.13	1376.19	4895.71	1302.61	-1.9101	9.06e-138	1.76e-135	S	protein conserved in bacteria	-	ko:K09985
SMa0830	nifE	17582.9	18124.4	18069.5	2591.06	4001.42	3241.86	17925.6	3278.11	-2.4511	5.99e-136	1.13e-133	C	cofactor biosynthesis protein nifE	-	ko:K02587
SMa0833	msi338	939.44	1001.25	983.73	135.54	208.2	188.26	974.807	177.333	-2.4587	2.5e-133	4.57e-131	S	Evidence 4 Homologs of previously reported genes of	-	-
SMa0840	nodD1	1667.63	1490.74	1554	350.07	456.94	428.61	1570.79	411.873	-1.9312	3.58e-132	6.36e-130	K	transcriptional regulator, lysr family	GO:0006355,GO:0008150,GO:0009889,GO:0010468,GO:0010556,GO:0019219,GO:0019222,GO:0031323,GO:0031326,GO:0050789,GO:0050794,GO:0051171,GO:0051252,GO:0060255,GO:0065007,GO:0080090,GO:1903506,GO:2000112,GO:2001141	ko:K14657
SMc02703	moxR	78.76	77.22	67.7	734.22	681.72	704.1	74.56	706.68	3.2446	5.02e-130	8.68e-128	S	ATPase associated with various cellular activities	GO:0005575,GO:0005618,GO:0005623,GO:0030312,GO:0044464,GO:0071944	ko:K03924
SMc02087	gltA	67529.9	65293.6	69318.7	26685.5	25495.9	24789.6	67380.7	25657	-1.393	2.18e-129	3.67e-127	C	Belongs to the citrate synthase family	-	ko:K01647
SMc01774		324	248.07	255.03	3067.77	2977.92	2780.62	275.7	2942.1	3.4157	5.61e-129	9.18e-127	-	-	-	-
SMa6189	MA20_28940	199.83	216.16	216.49	23.62	23.49	30.75	210.827	25.9533	-3.0221	9.44e-128	1.51e-125	H	Belongs to the pyridoxine kinase family	-	ko:K00868
SMc00800		30.75	31.38	28.9	410.48	419.63	350.79	30.3433	393.633	3.6974	1.39e-126	2.17e-124	-	-	-	-
SMc01512	hmuT	43.21	38.28	33.32	460.82	473.06	429.24	38.27	454.373	3.5696	2.15e-126	3.26e-124	P	ABC-type hemin transport system, periplasmic component	-	ko:K02016
SMc00611	lpiA	46.71	38.81	32.78	547.95	749.43	678.37	39.4333	658.583	4.0619	8.88e-126	1.32e-123	S	Uncharacterised conserved protein (DUF2156)	-	ko:K07027,ko:K14205
SMa0831	nifX	6285.55	6147.34	6419.78	892.6	1440.36	1155.3	6284.22	1162.75	-2.4342	1.92e-122	2.78e-120	S	Dinitrogenase iron-molybdenum cofactor	-	ko:K02596
SMa0126		337.76	436.36	402.75	63.51	75.54	77.81	392.29	72.2867	-2.4401	5.98e-119	8.45e-117	K	Cold shock	-	ko:K03704
SMc02705	MA20_44655	67.73	67.32	63.42	567.32	564.26	561.02	66.1567	564.2	3.0922	1.41e-118	1.95e-116	S	Aerotolerance regulator N-terminal	-	-
SMb20427	glnQ	51.25	64.59	52.45	605.65	756.34	726.06	56.0967	696.017	3.6331	4.42e-117	5.97e-115	E	ABC transporter, ATP-binding protein	-	ko:K02028,ko:K09972,ko:K10010
SMc02593		436.11	537.67	557.83	110.75	97.19	92.25	510.537	100.063	-2.3511	8.56e-117	1.13e-114	-	-	-	-
SMc03841	clpP1	184.25	181.13	194.28	23.23	26.26	31.38	186.553	26.9567	-2.7909	1.71e-114	2.21e-112	OU	Cleaves peptides in various proteins in a process that requires ATP hydrolysis. Has a chymotrypsin-like activity. Plays a major role in the degradation of misfolded proteins	-	ko:K01358
SMa0829	nifK	17333.2	16581.3	17648.9	2309.15	3884.89	3153.37	17187.8	3115.8	-2.4637	4.96e-114	6.3e-112	C	This molybdenum-iron protein is part of the nitrogenase complex that catalyzes the key enzymatic reactions in nitrogen fixation	-	ko:K02591
SMc02508	sitB	151.04	116.81	119.09	1618.3	1322.91	1369.29	128.98	1436.83	3.4777	4.53e-113	5.63e-111	P	ABC-type Mn Zn transport systems, ATPase component	-	ko:K11607
SMa0838		1193.37	1131.47	1146.03	220.73	332.11	267.33	1156.96	273.39	-2.0813	5.96e-113	7.28e-111	#N/A	#N/A	#N/A	#N/A
SMc02406_AA.1273		708.86	881.84	816.07	194.4	230.31	218.38	802.257	214.363	-1.904	1.28e-112	1.53e-110	#N/A	#N/A	#N/A	#N/A
SMa0835		1095.02	948.38	985.2	194.78	285.59	249.13	1009.53	243.167	-2.0537	2.08e-111	2.44e-109	#N/A	#N/A	#N/A	#N/A
SMb20718		332.57	394.43	391.64	77.06	89.36	91.62	372.88	86.0133	-2.1161	7.55e-111	8.7e-109	G	ABC transporter	-	ko:K10441
SMc02874	murQ	46.06	45.58	46.97	460.05	430.68	420.45	46.2033	437.06	3.2418	1.11e-110	1.26e-108	S	Specifically catalyzes the cleavage of the D-lactyl ether substituent of MurNAc 6-phosphate, producing GlcNAc 6- phosphate and D-lactate. Together with AnmK, is also required for the utilization of anhydro-N-acetylmuramic acid (anhMurNAc) either imported from the medium or derived from its own cell wall murein, and thus plays a role in cell wall recycling	-	ko:K07106
SMb21655	lacZ	178.55	193.11	214.09	25.95	28.1	26.98	195.25	27.01	-2.8538	4.29e-110	4.77e-108	G	Belongs to the glycosyl hydrolase 2 family	-	ko:K01190
SMa0824		181.79	187.9	183.18	29.82	36.85	32	184.29	32.89	-2.4863	4.73e-110	5.16e-108	K	bacterial-type RNA polymerase transcriptional activator activity, sequence-specific DNA binding	-	-
SMc04246		95.89	68.49	61.82	954.17	1138.2	1229.35	75.4	1107.24	3.8763	5.36e-110	5.75e-108	S	Nickel/cobalt transporter regulator	-	-
SMc01828		2404.78	2944.88	2853.1	860.46	864.59	923.73	2734.25	882.927	-1.6308	1.65e-109	1.73e-107	M	Belongs to the membrane fusion protein (MFP) (TC 8.A.1) family	-	ko:K02005
SMc04043	MA20_06380	2502.1	2836.02	3067.72	852.72	748.97	877.92	2801.95	826.537	-1.7613	4.24e-109	4.39e-107	E	N-formylglutamate amidohydrolase	-	ko:K01458
SMc02507	sitC	86.68	74.22	79.35	1029.69	786.74	848.43	80.0833	888.287	3.4715	1.1e-108	1.12e-106	P	ABC-type Mn2 Zn2 transport systems, permease components	-	ko:K11605
SMa1223		1971	2182.98	2142.6	810.12	849.85	784.42	2098.86	814.797	-1.3651	1.98e-108	1.98e-106	S	Pyridoxamine 5'-phosphate oxidase	-	ko:K07005
SMc01451		217.08	227.75	232.15	46.86	51.59	55.85	225.66	51.4333	-2.1334	1.61e-106	1.59e-104	S	Domain of unknown function (DUF4169)	-	-
SMb20019		5.06	5.34	4.01	149.09	134.5	146.84	4.80333	143.477	4.9006	9.77e-106	9.5e-104	C	e3 binding domain	-	ko:K00658
SMc02514	MA20_44770	77.85	66.15	60.48	628.5	787.2	807.64	68.16	741.113	3.4427	1.95e-104	1.87e-102	G	ABC transporter substrate-binding protein	-	ko:K17321
SMc02088		2745.39	2308.64	2542.54	783.01	942.43	920.6	2532.19	882.013	-1.5215	8.86e-104	8.35e-102	L	GIY-YIG catalytic domain	-	ko:K07461
SMc02052		1135.11	1093.05	1142.42	446.88	483.19	484.46	1123.53	471.51	-1.2527	3.08e-103	2.86e-101	S	Domain of unknown function (DUF1127)	-	-
SMb20589	pcaF	10.38	11.07	10.04	174.65	167.67	168.81	10.4967	170.377	4.0207	2.12e-102	1.94e-100	I	Belongs to the thiolase family	-	ko:K00626,ko:K00632,ko:K07823
SMc02509	sitA	558.86	478.16	406.5	4676.39	4027.68	4232.74	481.173	4312.27	3.1638	1.2e-101	1.09e-99	P	Belongs to the bacterial solute-binding protein 9 family	-	ko:K02077,ko:K09815,ko:K11604
SMc03015		414.31	531.03	496.55	90.62	98.57	126.13	480.63	105.107	-2.1931	1.26e-101	1.12e-99	K	helix_turn_helix, Lux Regulon	-	-
SMc01902		570.15	743.94	711.84	145.99	148.78	184.5	675.31	159.757	-2.0797	1.39e-101	1.22e-99	#N/A	#N/A	#N/A	#N/A
SMb20818	mocD	481.53	610.59	629.81	120.82	140.95	149.35	573.977	137.04	-2.0664	4.41e-98	3.81e-96	I	Fatty acid desaturase	-	-
SMc03244		394.85	499.13	507.65	117.72	117	120.49	467.21	118.403	-1.9804	7.87e-98	6.71e-96	S	KTSC domain	-	-
SMa0125	groS	182.44	209.91	221.58	33.3	41	39.53	204.643	37.9433	-2.4312	1.32e-97	1.11e-95	O	Binds to Cpn60 in the presence of Mg-ATP and suppresses the ATPase activity of the latter	-	ko:K04078
SMc01789		247.19	364.22	353.24	43.76	50.21	53.97	321.55	49.3133	-2.705	2.33e-97	1.93e-95	-	-	-	-
SMb20432	eutB	18.3	20.97	19.13	214.15	249.66	230.31	19.4667	231.373	3.5711	1.06e-95	8.7e-94	E	threonine dehydratase	-	ko:K01754
SMc01628		32.44	27.22	31.04	301.66	356.06	399.11	30.2333	352.277	3.5425	4.71e-95	3.81e-93	G	Bacterial extracellular solute-binding protein	-	ko:K02027
SMb21654	lacG	133.52	137.25	150.13	12	12.44	21.34	140.3	15.26	-3.2007	3.41e-94	2.72e-92	G	Binding-protein-dependent transport system inner membrane component	-	ko:K10190
SMc01511	hmuU	21.8	24.22	19.4	238.93	233.07	231.56	21.8067	234.52	3.4269	2.5e-93	1.97e-91	P	Belongs to the binding-protein-dependent transport system permease family. FecCD subfamily	-	ko:K02015
SMc01452	MA20_02235	455.32	523.61	553.41	142.12	143.25	168.81	510.78	151.393	-1.7544	4.56e-93	3.55e-91	S	protein related to arylsulfate sulfotransferase involved in siderophore biosynthesis	-	-
SMb21653	lacF	168.42	173.97	204.85	21.3	26.72	35.14	182.413	27.72	-2.7182	5.38e-93	4.13e-91	G	Binding-protein-dependent transport system inner membrane component	-	ko:K10189
SMc04310		195.15	289.08	259.98	35.24	43.3	33.89	248.07	37.4767	-2.7267	3.64e-92	2.76e-90	-	-	-	-
SMc01514		15.83	18.1	15.12	187.04	237.22	236.58	16.35	220.28	3.752	3.36e-91	2.52e-89	-	-	-	-
SMb20347		109.64	125.92	111.99	798.89	906.04	935.66	115.85	880.197	2.9256	4.5e-91	3.33e-89	K	transcriptional regulator	-	-
SMa0769	ccoP	1414.61	1321.84	1396.78	652.9	668.82	655.78	1377.74	659.167	-1.0636	1.13e-90	8.29e-89	C	C-type cytochrome. Part of the cbb3-type cytochrome c oxidase complex	-	ko:K00406
SMc01829	MA20_39335	2922.38	3866.7	3725.63	1052.92	1137.74	1170.98	3504.9	1120.55	-1.6452	1.27e-90	9.2e-89	V	Belongs to the resistance-nodulation-cell division (RND) (TC 2.A.6) family	-	ko:K03296
SMa0834	fdxB	388.49	352.76	374.52	54.6	99.49	69.03	371.923	74.3733	-2.3221	1.68e-89	1.2e-87	C	4Fe-4S dicluster domain	-	-
SMa2393		492.3	593.66	605.33	172.71	187.47	180.73	563.763	180.303	-1.6447	2.18e-89	1.54e-87	K	Belongs to the ParB family	-	ko:K03497
SMc02089	lpxB	1825.03	1689.06	1831.37	682.72	809.31	782.54	1781.82	758.19	-1.2327	2e-88	1.4e-86	M	Condensation of UDP-2,3-diacylglucosamine and 2,3- diacylglucosamine-1-phosphate to form lipid A disaccharide, a precursor of lipid A, a phosphorylated glycolipid that anchors the lipopolysaccharide to the outer membrane of the cell	GO:0003674,GO:0005488,GO:0005543,GO:0005575,GO:0005622,GO:0005623,GO:0005737,GO:0005829,GO:0005975,GO:0006629,GO:0006643,GO:0006644,GO:0006664,GO:0006793,GO:0006796,GO:0008150,GO:0008152,GO:0008289,GO:0008610,GO:0008654,GO:0009058,GO:0009245,GO:0009247,GO:0009311,GO:0009312,GO:0009987,GO:0016051,GO:0019637,GO:0043167,GO:0043168,GO:0044237,GO:0044238,GO:0044249,GO:0044255,GO:0044424,GO:0044444,GO:…	ko:K00748
SMa0771		946.96	774.54	857.01	323.74	357.9	328.83	859.503	336.823	-1.3515	4.98e-88	3.44e-86	#N/A	#N/A	#N/A	#N/A
SMc02051		1294.06	1319.89	1353.96	361.3	502.08	465.01	1322.64	442.797	-1.5787	1.07e-87	7.33e-86	S	Domain of unknown function (DUF1127)	-	-
SMc01175		18.81	19.01	18.46	190.14	203.13	206.46	18.76	199.91	3.4136	1.25e-87	8.43e-86	IQ	Belongs to the short-chain dehydrogenases reductases (SDR) family	-	-
SMc03840	pat	375.13	384.66	376.93	158.38	141.87	138.69	378.907	146.313	-1.3728	5.96e-87	3.99e-85	M	Sortase and related acyltransferases	-	ko:K03823
SMa0765	ccoN	5277.47	5072.26	5492.92	2478.38	2684.97	2517.05	5280.88	2560.13	-1.0446	1.75e-86	1.16e-84	C	Belongs to the heme-copper respiratory oxidase family	GO:0005575,GO:0005623,GO:0005886,GO:0006091,GO:0006810,GO:0006811,GO:0006812,GO:0008150,GO:0008152,GO:0009060,GO:0009987,GO:0015672,GO:0015980,GO:0015988,GO:0015990,GO:0016020,GO:0022900,GO:0022904,GO:0034220,GO:0044237,GO:0044464,GO:0045333,GO:0051179,GO:0051234,GO:0055085,GO:0055114,GO:0071944,GO:0098655,GO:0098660,GO:0098662,GO:1902600	ko:K00404
SMc01443		219.94	250.02	257.71	58.09	70.48	68.4	242.557	65.6567	-1.8853	2.99e-86	1.96e-84	O	Glutathione S-transferase, N-terminal domain	-	ko:K00799
SMa0191		279.76	312.78	298.25	92.16	102.26	109.19	296.93	101.203	-1.5529	1.3e-85	8.45e-84	S	Activator of Hsp90 ATPase homolog 1-like protein	-	-
SMc02162	fadD	2201.19	2419.06	2394.96	893.76	1000.93	1080.62	2338.4	991.77	-1.2374	2.33e-85	1.5e-83	IQ	Acyl-CoA synthetases (AMP-forming) AMP-acid ligases II	GO:0001676,GO:0003674,GO:0003824,GO:0004467,GO:0005488,GO:0005504,GO:0005575,GO:0005622,GO:0005623,GO:0005737,GO:0005829,GO:0005886,GO:0006082,GO:0006139,GO:0006163,GO:0006629,GO:0006631,GO:0006635,GO:0006637,GO:0006644,GO:0006725,GO:0006732,GO:0006753,GO:0006790,GO:0006793,GO:0006796,GO:0006807,GO:0008150,GO:0008152,GO:0008289,GO:0008610,GO:0008654,GO:0009056,GO:0009058,GO:0009062,GO:0009117,GO:…	ko:K01897
SMa0809		448.96	394.3	441.42	142.89	163.98	166.92	428.227	157.93	-1.4391	6.35e-85	4.03e-83	-	-	-	-
SMc02372		572.88	639.5	642.53	233.9	259.79	227.8	618.303	240.497	-1.3623	1.34e-84	8.41e-83	EGP	Major Facilitator Superfamily	-	-
SMc03287		570.67	579.99	642.26	187.43	225.24	230.31	597.64	214.327	-1.4795	3.73e-84	2.32e-82	C	Common central domain of tyrosinase	-	-
SMc01444	thyA	592.08	699.92	700.46	220.73	231.23	259.8	664.153	237.253	-1.4851	1.12e-83	6.93e-82	F	Catalyzes the reductive methylation of 2'-deoxyuridine- 5'-monophosphate (dUMP) to 2'-deoxythymidine-5'-monophosphate (dTMP) while utilizing 5,10-methylenetetrahydrofolate (mTHF) as the methyl donor and reductant in the reaction, yielding dihydrofolate (DHF) as a by-product. This enzymatic reaction provides an intracellular de novo source of dTMP, an essential precursor for DNA biosynthesis	-	ko:K00560
SMc06990		8111.35	8441.13	8378.4	4349.16	4018.47	3826.09	8310.29	4064.57	-1.0318	3.06e-83	1.87e-81	M	Phosphoribosylglycinamide synthetase, ATP-grasp (A) domain	-	-
SMb21652	lacE	452.85	488.97	534.41	70.87	120.68	119.86	492.077	103.803	-2.245	4.2e-83	2.54e-81	G	Bacterial extracellular solute-binding protein	-	ko:K10188
SMc04245	znuA	61.37	51.7	53.52	408.93	473.52	511.44	55.53	464.63	3.0647	2.4e-82	1.43e-80	P	ABC-type Zn2 transport system, periplasmic component surface adhesin	-	ko:K09815
SMc04382	ndvB	308.17	261.09	250.75	1708.14	1663.77	1673.01	273.337	1681.64	2.6211	7.15e-81	4.24e-79	G	carbohydrate binding	GO:0003674,GO:0003824,GO:0016740,GO:0016757	ko:K13688,ko:K18786
SMa0520		21.67	19.79	19.4	192.07	246.89	257.92	20.2867	232.293	3.5173	1.03e-80	6.05e-79	K	Helix-turn-helix domain, rpiR family	-	-
SMa0766	ccoO	1675.29	1452.71	1631.87	735.38	742.06	668.95	1586.62	715.463	-1.149	2.36e-80	1.37e-78	C	cytochrome C oxidase mono-heme subunit FixO	-	ko:K00405
SMb20506	araH	166.09	167.46	203.52	33.69	42.84	38.91	179.023	38.48	-2.218	3.42e-80	1.97e-78	G	Belongs to the binding-protein-dependent transport system permease family	GO:0005575,GO:0005623,GO:0005886,GO:0016020,GO:0016021,GO:0031224,GO:0044425,GO:0044464,GO:0071944	ko:K10538
SMc02704	MA20_44650	22.06	17.97	17.26	188.59	201.29	198.93	19.0967	196.27	3.3614	5.6e-80	3.19e-78	S	conserved protein (some members contain a von Willebrand factor type A (vWA) domain)	-	-
SMc00338		143.51	139.59	155.75	947.2	910.19	972.06	146.283	943.15	2.6887	8.67e-80	4.9e-78	S	BA14K-like protein	-	-
SMc06992		3115.2	3484.51	3515.56	1608.62	1591.45	1679.92	3371.76	1626.66	-1.0516	1.63e-78	9.15e-77	O	L-proline 3-hydroxylase, C-terminal	-	ko:K21614
SMb20539		407.96	434.28	485.44	135.15	156.15	166.92	442.56	152.74	-1.5348	2.52e-78	1.4e-76	T	Tetratricopeptide repeat	-	ko:K01768
SMb20345	ttgB	186.72	205.74	192.68	1158.64	1100.89	1184.16	195.047	1147.9	2.5571	7.18e-78	3.95e-76	V	Belongs to the resistance-nodulation-cell division (RND) (TC 2.A.6) family	-	-
SMa6103		136.11	156.26	153.61	34.85	35.93	38.91	148.66	36.5633	-2.0235	7.58e-78	4.13e-76	#N/A	#N/A	#N/A	#N/A
SMb20717	cytR	373.18	462.27	444.63	144.06	129.9	156.88	426.693	143.613	-1.571	1.21e-77	6.54e-76	K	transcriptional	GO:0000976,GO:0001067,GO:0003674,GO:0003676,GO:0003677,GO:0003690,GO:0005488,GO:0005575,GO:0005622,GO:0005623,GO:0005737,GO:0005829,GO:0006355,GO:0008150,GO:0009889,GO:0009890,GO:0009892,GO:0010468,GO:0010556,GO:0010558,GO:0010605,GO:0010629,GO:0019219,GO:0019222,GO:0031323,GO:0031324,GO:0031326,GO:0031327,GO:0043565,GO:0044212,GO:0044424,GO:0044444,GO:0044464,GO:0045892,GO:0045934,GO:0048519,GO:…	ko:K02529,ko:K05499
SMb20719		122.1	153.53	148.66	26.33	23.95	30.75	141.43	27.01	-2.3885	1.73e-77	9.29e-76	G	Belongs to the binding-protein-dependent transport system permease family	GO:0003674,GO:0005215,GO:0005575,GO:0005623,GO:0005886,GO:0006810,GO:0008150,GO:0008643,GO:0015144,GO:0015145,GO:0015749,GO:0016020,GO:0016021,GO:0022857,GO:0031224,GO:0034219,GO:0044425,GO:0044464,GO:0051119,GO:0051179,GO:0051234,GO:0055085,GO:0071702,GO:0071944	ko:K10440
SMc02506	sitD	88.62	63.68	66.9	772.94	647.17	622.52	73.0667	680.877	3.2201	5.98e-77	3.18e-75	P	ABC-type Mn2 Zn2 transport systems, permease components	-	ko:K02075,ko:K11606,ko:K11708,ko:K11709
SMc03112	metH	219.94	302.63	218.77	2222.41	1946.59	2109.15	247.113	2092.72	3.0821	1.08e-76	5.68e-75	E	Methionine synthase	GO:0000096,GO:0000097,GO:0003674,GO:0003824,GO:0005488,GO:0005575,GO:0005622,GO:0005623,GO:0005737,GO:0005829,GO:0006082,GO:0006464,GO:0006479,GO:0006520,GO:0006555,GO:0006575,GO:0006725,GO:0006730,GO:0006732,GO:0006760,GO:0006790,GO:0006807,GO:0008144,GO:0008150,GO:0008152,GO:0008168,GO:0008172,GO:0008213,GO:0008270,GO:0008276,GO:0008652,GO:0008705,GO:0009058,GO:0009066,GO:0009067,GO:0009086,GO:…	ko:K00548
SMc02905	dnaX	3818.22	4438.88	4445.5	2008.26	1917.57	1957.29	4234.2	1961.04	-1.1105	1.56e-76	8.14e-75	L	DNA polymerase III is a complex, multichain enzyme responsible for most of the replicative synthesis in bacteria. This DNA polymerase also exhibits 3' to 5' exonuclease activity	-	ko:K02343
SMa2297		10.12	11.59	8.83	139.8	127.13	155	10.18	140.643	3.7882	1.71e-76	8.88e-75	T	protein with a bacterial SH3 domain	-	-
SMc01278	sugE	231.49	283.75	329.83	67.77	69.55	67.77	281.69	68.3633	-2.0428	2.25e-76	1.16e-74	P	Small multidrug resistance protein	GO:0005575,GO:0005623,GO:0005886,GO:0005887,GO:0006810,GO:0008150,GO:0015893,GO:0016020,GO:0016021,GO:0031224,GO:0031226,GO:0042221,GO:0042493,GO:0044425,GO:0044459,GO:0044464,GO:0046618,GO:0050896,GO:0051179,GO:0051234,GO:0055085,GO:0071944	ko:K11741
SMa1077		60.73	45.71	73.46	640.12	870.58	768.73	59.9667	759.81	3.6634	4.9e-76	2.5e-74	M	Four repeated domains in the Fasciclin I family of proteins, present in many other contexts.	-	-
SMb20999	bacA	285.59	207.7	245.13	1804.18	2158.47	1888.89	246.14	1950.51	2.9863	1.46e-75	7.41e-74	I	ABC-type long-chain fatty acid transport system, fused permease and ATPase	GO:0003674,GO:0005215,GO:0005575,GO:0005623,GO:0005886,GO:0005887,GO:0006810,GO:0006855,GO:0008150,GO:0015238,GO:0015291,GO:0015638,GO:0015833,GO:0015893,GO:0016020,GO:0016021,GO:0019534,GO:0022804,GO:0022857,GO:0031224,GO:0031226,GO:0042221,GO:0042493,GO:0042884,GO:0042885,GO:0042886,GO:0042887,GO:0042891,GO:0042895,GO:0044425,GO:0044459,GO:0044464,GO:0046677,GO:0050896,GO:0051179,GO:0051234,GO:…	ko:K17938
SMc01724	msrB1	18.81	24.35	21.81	238.93	214.65	205.83	21.6567	219.803	3.3433	1.91e-75	9.56e-74	O	methionine sulfoxide reductase	-	ko:K07305
SMc00563		25.43	26.56	24.89	213.37	219.72	208.34	25.6267	213.81	3.0606	1.71e-74	8.46e-73	EGP	Major facilitator superfamily	-	-
SMc02730		375.65	411.23	406.63	168.06	175.04	181.99	397.837	175.03	-1.1846	8.3e-74	4.07e-72	-	-	-	-
SMa0190	MA20_20735	137.28	161.86	148.92	36.01	38.69	44.56	149.353	39.7533	-1.9096	1.23e-73	5.97e-72	K	Bacterial regulatory proteins, tetR family	-	-
SMb20820	mocF	171.93	187.38	202.98	44.15	50.21	60.87	187.43	51.7433	-1.8569	2.25e-73	1.08e-71	S	Reductase C-terminal	-	ko:K00529
SMc02813		241.48	299.63	323.67	83.65	82.45	67.77	288.26	77.9567	-1.8866	6.59e-73	3.15e-71	V	Aminoglycoside 3-N-acetyltransferase	-	ko:K00662
SMc02118	aapJ	228.11	218.12	205.92	1169.48	1132.67	1263.86	217.383	1188.67	2.451	7.58e-73	3.6e-71	ET	ABC-type amino acid transport signal transduction systems, periplasmic component domain	GO:0005575,GO:0005623,GO:0042597,GO:0044464	ko:K09969
SMb20426		31.01	32.16	27.56	239.71	240.44	229.05	30.2433	236.4	2.9665	2.83e-72	1.33e-70	K	transcriptional regulator	-	-
SMc03243	MA20_25290	317.64	403.29	429.51	89.45	95.35	124.25	383.48	103.017	-1.8963	3.07e-72	1.44e-70	P	PhoD-like phosphatase	-	ko:K01113
SMc02900		178.8	197.54	221.04	46.86	59.42	58.99	199.127	55.09	-1.8538	1.09e-71	5.04e-70	S	Domain of unknown function (DUF1127)	-	-
SMc02366	ragA	17.91	16.41	15.92	152.96	163.06	168.18	16.7467	161.4	3.2687	6.65e-71	3.07e-69	T	Response regulators consisting of a CheY-like receiver domain and a winged-helix DNA-binding domain	GO:0000160,GO:0003674,GO:0003676,GO:0003677,GO:0005488,GO:0005515,GO:0006355,GO:0007154,GO:0007165,GO:0008150,GO:0009889,GO:0009893,GO:0009987,GO:0010035,GO:0010038,GO:0010468,GO:0010556,GO:0010604,GO:0010628,GO:0019219,GO:0019222,GO:0023052,GO:0031323,GO:0031326,GO:0035556,GO:0042221,GO:0042802,GO:0046688,GO:0048518,GO:0050789,GO:0050794,GO:0050896,GO:0051171,GO:0051252,GO:0051716,GO:0060255,GO:…	ko:K02483
SMc01904	clpX	557.05	601.35	551	2838.9	3145.13	3267.59	569.8	3083.87	2.4362	8.93e-71	4.09e-69	O	ATP-dependent specificity component of the Clp protease. It directs the protease to specific substrates. Can perform chaperone functions in the absence of ClpP	GO:0000166,GO:0003674,GO:0003824,GO:0004176,GO:0005488,GO:0005524,GO:0006508,GO:0006807,GO:0008144,GO:0008150,GO:0008152,GO:0008233,GO:0009056,GO:0009057,GO:0009987,GO:0016462,GO:0016787,GO:0016817,GO:0016818,GO:0016887,GO:0017076,GO:0017111,GO:0019538,GO:0030163,GO:0030554,GO:0032553,GO:0032555,GO:0032559,GO:0035639,GO:0036094,GO:0042623,GO:0043167,GO:0043168,GO:0043170,GO:0044238,GO:0051301,GO:…	ko:K03544
SMc02789	dnaQ	676.68	833.66	861.7	300.89	309.08	327.57	790.68	312.513	-1.3392	3.98e-69	1.81e-67	L	DNA polymerase III is a complex, multichain enzyme responsible for most of the replicative synthesis in bacteria. The epsilon subunit contain the editing function and is a proofreading 3'-5' exonuclease	GO:0003674,GO:0003824,GO:0004518,GO:0004527,GO:0005575,GO:0005622,GO:0005623,GO:0005737,GO:0005829,GO:0006139,GO:0006259,GO:0006260,GO:0006261,GO:0006281,GO:0006725,GO:0006807,GO:0006950,GO:0006974,GO:0008150,GO:0008152,GO:0008408,GO:0009058,GO:0009059,GO:0009360,GO:0009987,GO:0016787,GO:0016788,GO:0032991,GO:0033554,GO:0034641,GO:0034645,GO:0042575,GO:0043170,GO:0044237,GO:0044238,GO:0044249,GO:…	ko:K02342
SMc02201		147.27	138.81	142.23	45.7	49.29	42.67	142.77	45.8867	-1.6375	5.27e-69	2.37e-67	K	genomic island protein Bartonella henselae str. Houston-1 gi 49238468 emb CAF27697.1	-	-
SMb21168		162.84	176.97	179.56	60.02	50.67	60.24	173.123	56.9767	-1.6034	6.37e-69	2.85e-67	EGP	Major Facilitator Superfamily	-	-
SMc03251		17884.6	21656.6	20122.5	10036.6	8993.18	8699.55	19887.9	9243.13	-1.1054	7.13e-69	3.17e-67	S	Domain of unknown function (DUF1611_N) Rossmann-like domain	-	-
SMa0232		122.36	155.09	150.66	32.53	30.86	38.91	142.703	34.1	-2.0652	2.4e-68	1.06e-66	#N/A	#N/A	#N/A	#N/A
SMc01657	fct	117.69	112.9	88.04	671.1	705.67	686.53	106.21	687.767	2.695	6.22e-68	2.73e-66	P	receptor	-	ko:K02014
SMc00529	nifS	639.57	634.29	522.91	3211.82	3116.57	3208.6	598.923	3179	2.4081	1.37e-67	5.95e-66	E	Cysteine sulfinate desulfinase cysteine desulfurase and related enzymes	GO:0000096,GO:0003674,GO:0003824,GO:0005488,GO:0005515,GO:0005575,GO:0005622,GO:0005623,GO:0005634,GO:0005654,GO:0005737,GO:0005739,GO:0005759,GO:0005829,GO:0006082,GO:0006139,GO:0006163,GO:0006464,GO:0006520,GO:0006725,GO:0006732,GO:0006753,GO:0006790,GO:0006793,GO:0006796,GO:0006807,GO:0008150,GO:0008152,GO:0009058,GO:0009116,GO:0009117,GO:0009119,GO:0009141,GO:0009144,GO:0009150,GO:0009199,GO:…	ko:K04487
SMb21186	gabT	79.02	72.27	61.01	458.11	518.66	456.85	70.7667	477.873	2.7555	2.27e-67	9.76e-66	E	Belongs to the class-III pyridoxal-phosphate-dependent aminotransferase family	GO:0001505,GO:0003674,GO:0003824,GO:0003867,GO:0003992,GO:0005488,GO:0005575,GO:0005622,GO:0005623,GO:0005737,GO:0005829,GO:0006082,GO:0006520,GO:0006525,GO:0006526,GO:0006576,GO:0006591,GO:0006595,GO:0006598,GO:0006807,GO:0008144,GO:0008150,GO:0008152,GO:0008483,GO:0008652,GO:0009056,GO:0009058,GO:0009063,GO:0009064,GO:0009084,GO:0009308,GO:0009310,GO:0009445,GO:0009447,GO:0009448,GO:0009450,GO:…	ko:K00823,ko:K07250
SMc01237	nrdJ	3513.16	3397.52	3824.78	1512.58	1766.02	1840.57	3578.49	1706.39	-1.0684	2.52e-67	1.08e-65	F	Catalyzes the reduction of ribonucleotides to deoxyribonucleotides. May function to provide a pool of deoxyribonucleotide precursors for DNA repair during oxygen limitation and or for immediate growth after restoration of oxygen	-	ko:K00525
SMc00079		762.84	760.86	812.72	399.64	384.16	338.24	778.807	374.013	-1.0582	4.32e-67	1.83e-65	S	HAD-hyrolase-like	-	-
SMb20720		117.04	141.55	128.45	30.21	38.23	33.26	129.013	33.9	-1.9282	3.24e-66	1.35e-64	G	ABC transporter substrate-binding protein	-	ko:K10439
SMc01515		20.89	23.05	19.27	166.13	193	195.16	21.07	184.763	3.1324	8.65e-66	3.59e-64	M	Gram-negative bacterial TonB protein C-terminal	-	ko:K03832
SMc01118	yeaZ	926.2	1334.48	1152.32	412.42	430.68	435.51	1137.67	426.203	-1.4165	4.73e-65	1.95e-63	O	COG1214 Inactive homolog of metal-dependent proteases	-	ko:K01409,ko:K14742
SMc00784	futA1	122.1	90.5	84.97	692.4	742.06	716.65	99.19	717.037	2.8538	6.35e-65	2.6e-63	P	ABC-type Fe3 transport system, periplasmic component	-	ko:K02012
SMc03250		412.24	541.84	449.85	194.78	189.32	173.2	467.977	185.767	-1.3329	2.5e-64	1.02e-62	L	Transposase	-	ko:K07483
SMc02250	mscL	619.46	781.83	803.22	277.66	212.81	274.23	734.837	254.9	-1.5275	4.35e-64	1.76e-62	M	Channel that opens in response to stretch forces in the membrane lipid bilayer. May participate in the regulation of osmotic pressure changes within the cell	GO:0003674,GO:0005215,GO:0005575,GO:0006810,GO:0006811,GO:0006884,GO:0008150,GO:0008361,GO:0008381,GO:0009987,GO:0009992,GO:0015267,GO:0016020,GO:0016021,GO:0016043,GO:0019725,GO:0022803,GO:0022836,GO:0022857,GO:0030104,GO:0031224,GO:0032535,GO:0042592,GO:0044425,GO:0048878,GO:0051179,GO:0051234,GO:0055082,GO:0055085,GO:0065007,GO:0065008,GO:0071840,GO:0090066	ko:K03282
SMa0160		4.67	3.52	5.35	85.19	84.29	89.74	4.51333	86.4067	4.2589	6.12e-64	2.46e-62	K	FCD	-	-
SMb20433	eutC	19.07	24.61	17.39	176.2	190.24	191.4	20.3567	185.947	3.1913	1.01e-63	3.98e-62	E	ornithine cyclodeaminase	-	ko:K01750
SMc02367	ragB	22.19	22.14	19.27	181.62	205.9	165.04	21.2	184.187	3.119	1.19e-63	4.69e-62	T	Histidine kinase	-	-
SMc03839	ybhL	16159.6	18441.1	21789.4	6786.1	7170.04	8294.16	18796.7	7416.77	-1.3416	1.69e-62	6.57e-61	S	Belongs to the BI1 family	-	ko:K06890
SMb21648		114.06	145.71	133.67	33.3	37.31	37.02	131.147	35.8767	-1.8701	2.72e-62	1.05e-60	G	COG1486 Alpha-galactosidases 6-phospho-beta-glucosidases, family 4 of glycosyl hydrolases	-	ko:K07406
SMc03989		145.72	141.94	144.51	726.86	812.54	872.9	144.057	804.1	2.4807	3.41e-62	1.31e-60	S	Protein of unknown function (DUF1465)	-	ko:K13592
SMc01442	folA	150.52	151.18	152.4	58.09	55.74	60.87	151.367	58.2333	-1.3781	3.61e-62	1.38e-60	H	Key enzyme in folate metabolism. Catalyzes an essential reaction for de novo glycine and purine synthesis, and for DNA precursor synthesis	-	ko:K00287
SMc02171	frcB	126.64	113.81	117.48	927.84	1195.31	782.54	119.31	968.563	3.0211	9.59e-62	3.64e-60	G	ABC-type sugar transport system, periplasmic component	-	ko:K10552
SMc02085	exbB	73.7	69.15	54.73	403.12	433.45	447.43	65.86	428	2.7001	4.21e-61	1.59e-59	U	Biopolymer transport proteins	-	ko:K03561
SMc03922	glgB	82.14	72.66	75.33	418.61	433.91	456.22	76.71	436.247	2.5077	5.24e-61	1.97e-59	G	Catalyzes the formation of the alpha-1,6-glucosidic linkages in glycogen by scission of a 1,4-alpha-linked oligosaccharide from growing alpha-1,4-glucan chains and the subsequent attachment of the oligosaccharide to the alpha-1,6 position	-	ko:K00700
SMb20431	eutA	16.87	17.45	16.99	143.28	172.27	143.08	17.1033	152.877	3.16	6.29e-60	2.34e-58	Q	Asp Glu hydantoin racemase	-	ko:K01799
SMb20716		94.98	122.54	105.3	26.33	28.1	25.1	107.607	26.51	-2.0212	9.16e-60	3.39e-58	EG	EamA-like transporter family	-	-
SMb20002		74.48	81.91	81.49	9.29	17.04	10.67	79.2933	12.3333	-2.6846	9.69e-60	3.57e-58	P	Belongs to the ABC transporter superfamily	-	ko:K10111,ko:K10191
SMb20346		114.7	128.79	129.79	664.13	695.54	713.51	124.427	691.06	2.4735	2.09e-59	7.63e-58	M	Belongs to the membrane fusion protein (MFP) (TC 8.A.1) family	-	-
SMc02989		176.08	257.31	236.83	59.25	66.79	69.66	223.407	65.2333	-1.776	2.99e-59	1.09e-57	-	-	-	-
SMa0229	rnk	152.72	176.97	185.72	48.02	61.72	61.5	171.803	57.08	-1.5897	6.51e-59	2.35e-57	K	Necessary for efficient RNA polymerase transcription elongation past template-encoded arresting sites. The arresting sites in DNA have the property of trapping a certain fraction of elongating RNA polymerases that pass through, resulting in locked ternary complexes. Cleavage of the nascent transcript by cleavage factors such as GreA or GreB allows the resumption of elongation from the new 3'termi…	-	ko:K03624,ko:K06140
SMc04172	cyaH	52.16	56.38	53.92	308.64	321.05	325.69	54.1533	318.46	2.556	1.25e-58	4.48e-57	T	Adenylate cyclase	-	-
SMc02755	ahcY	556.27	578.04	482.5	2503.16	2678.52	2566.63	538.937	2582.77	2.2607	2.3e-58	8.16e-57	H	May play a key role in the regulation of the intracellular concentration of adenosylhomocysteine	GO:0000096,GO:0003674,GO:0003824,GO:0004013,GO:0005575,GO:0005622,GO:0005623,GO:0005737,GO:0005829,GO:0006082,GO:0006139,GO:0006520,GO:0006534,GO:0006555,GO:0006575,GO:0006725,GO:0006732,GO:0006790,GO:0006807,GO:0008150,GO:0008152,GO:0009066,GO:0009069,GO:0009116,GO:0009119,GO:0009987,GO:0016787,GO:0016801,GO:0016802,GO:0017144,GO:0019752,GO:0033353,GO:0034641,GO:0042278,GO:0043436,GO:0044237,GO:…	ko:K01251
SMa0453	vapC	266.13	294.03	303.47	126.63	134.04	139.31	287.877	133.327	-1.1105	2.67e-58	9.45e-57	S	Toxic component of a toxin-antitoxin (TA) module. An RNase	-	ko:K07062
SMc00252		18.3	20.18	24.35	190.53	169.05	210.85	20.9433	190.143	3.1825	6.69e-58	2.35e-56	-	-	-	-
SMb21163	hutU	16.48	16.15	14.58	139.41	128.51	137.43	15.7367	135.117	3.102	8.92e-58	3.12e-56	E	Catalyzes the conversion of urocanate to 4-imidazolone- 5-propionate	-	ko:K01712
SMb20429	ehuC	17.26	17.58	14.85	132.05	140.49	153.12	16.5633	141.887	3.0987	1.89e-57	6.55e-56	E	ABC transporter permease	-	ko:K02029
SMc01427		229.54	233.61	227.47	97.2	115.16	83.46	230.207	98.6067	-1.2232	2.28e-57	7.88e-56	#N/A	#N/A	#N/A	#N/A
SMc01583	yliI	29.84	25.26	24.62	181.62	206.36	192.65	26.5733	193.543	2.8646	4.27e-57	1.47e-55	G	Glucose sorbosone	GO:0003674,GO:0003824,GO:0005488,GO:0005509,GO:0005575,GO:0005623,GO:0008150,GO:0008152,GO:0016491,GO:0016614,GO:0016901,GO:0019842,GO:0030288,GO:0030313,GO:0031406,GO:0031975,GO:0036094,GO:0042597,GO:0043167,GO:0043168,GO:0043169,GO:0043177,GO:0044464,GO:0046872,GO:0048037,GO:0048038,GO:0055114,GO:0070968,GO:0097159,GO:1901363	ko:K00117,ko:K21430
SMb20434	eutD	31.01	26.69	32.65	216.47	210.5	249.76	30.1167	225.577	2.905	4.96e-57	1.7e-55	E	Creatinase/Prolidase N-terminal domain	-	ko:K01271,ko:K15783
SMb20819		73.57	85.03	87.37	14.72	18.89	11.3	81.99	14.97	-2.4534	5.15e-57	1.75e-55	P	Rieske-like [2Fe-2S] domain	-	ko:K05710,ko:K14578,ko:K18248
SMc02255	cydA	214.36	250.02	253.69	99.52	95.81	107.94	239.357	101.09	-1.2435	5.36e-57	1.81e-55	C	oxidase, subunit	-	ko:K00425
SMb23377		390.31	475.95	477.95	180.07	197.61	215.25	448.07	197.643	-1.1808	1.46e-56	4.89e-55	-	-	-	-
SMb21445	MA20_25110	168.55	201.84	197.09	64.28	76.92	77.81	189.16	73.0033	-1.3736	5.91e-56	1.97e-54	L	Topoisomerase IB	-	ko:K03168
SMa0873	nifN	957.22	727.14	805.5	379.5	436.67	404.13	829.953	406.767	-1.0288	3.04e-55	1.01e-53	C	Nitrogenase component 1 type Oxidoreductase	-	ko:K02592
SMc02267		149.35	150.53	170.6	56.15	64.95	59.62	156.827	60.24	-1.3804	6.58e-55	2.15e-53	K	Transcriptional regulator	-	-
SMc02845		10.64	8.46	12.31	104.94	143.71	123	10.47	123.883	3.5646	7.59e-55	2.46e-53	E	Glyoxalase/Bleomycin resistance protein/Dioxygenase superfamily	-	-
SMc01226		292.73	351.85	328.49	111.53	146.94	148.73	324.357	135.733	-1.2568	8.29e-55	2.67e-53	K	transcriptional regulators	-	-
SMa1668		153.63	164.07	180.37	48.79	60.8	69.66	166.023	59.75	-1.4744	2.86e-54	9.16e-53	E	amino acid	-	ko:K03294,ko:K03758,ko:K03759
SMb20231		288.97	348.33	371.97	146.77	139.57	146.22	336.423	144.187	-1.2223	4.45e-54	1.42e-52	G	Bacterial extracellular solute-binding protein	-	ko:K02027
SMb21521		88.88	101.05	99.01	29.43	24.87	30.75	96.3133	28.35	-1.7644	5.16e-54	1.64e-52	-	-	-	-
SMc02706	MA20_44660	38.28	34.77	26.76	238.93	228.93	229.68	33.27	232.513	2.805	5.54e-54	1.75e-52	S	membrane	-	-
SMb20043		199.44	254.97	244.59	89.45	100.42	87.23	233	92.3667	-1.3349	7.73e-54	2.43e-52	-	-	-	-
SMa0157	MA20_30160	5.71	5.86	6.42	72.03	93.97	87.23	5.99667	84.41	3.8152	1.47e-53	4.58e-52	G	Bacterial extracellular solute-binding protein, family 7	-	-
SMa0498		135.99	150.4	136.08	54.6	60.8	60.87	140.823	58.7567	-1.2611	1.69e-53	5.24e-52	K	LysR substrate binding domain	-	-
SMc01506	sigH	41.91	39.98	37.73	235.06	228.93	246.62	39.8733	236.87	2.5706	2.32e-53	7.14e-52	K	Belongs to the sigma-70 factor family. ECF subfamily	-	ko:K03088
SMc00490		277.16	396.38	345.88	117.34	110.09	143.08	339.807	123.503	-1.4602	3.08e-53	9.43e-52	K	Transcriptional regulators containing a DNA-binding HTH domain and an aminotransferase domain (MocR family) and their eukaryotic orthologs	-	-
SMc00564		14.92	14.98	12.31	121.6	144.64	116.09	14.07	127.443	3.1792	3.17e-53	9.66e-52	V	secretion protein	-	ko:K03543
SMc01611		196.58	220.98	202.04	99.52	94.43	106.68	206.533	100.21	-1.0433	1.6e-52	4.85e-51	P	receptor	-	ko:K02014
SMc03058		23.23	28.91	22.48	166.9	206.82	202.69	24.8733	192.137	2.9495	2.81e-52	8.45e-51	M	Glycosyltransferase like family 2	-	ko:K16556
SMa0990		93.17	121.49	104.9	26.72	35.47	29.49	106.52	30.56	-1.8014	4.82e-52	1.43e-50	#N/A	#N/A	#N/A	#N/A
SMb20821		76.04	82.95	88.18	22.46	22.11	15.69	82.39	20.0867	-2.0362	7.12e-52	2.11e-50	H	Ketopantoate hydroxymethyltransferase	-	ko:K00606
SMc01464		9.6	11.59	10.84	93.71	117.46	112.96	10.6767	108.043	3.3391	1.17e-51	3.44e-50	T	diguanylate cyclase	-	-
SMc02844		9.21	10.81	10.7	94.88	117.46	101.03	10.24	104.457	3.3506	1.64e-51	4.81e-50	K	Bacterial regulatory proteins, tetR family	-	-
SMc03751		142.6	163.03	139.96	53.44	66.79	63.38	148.53	61.2033	-1.2791	1.65e-51	4.83e-50	L	IS66 Orf2 like protein	-	ko:K07484
SMc03958	tolQ	59.04	54.3	47.77	284.24	319.67	326.95	53.7033	310.287	2.5305	3.1e-51	9.02e-50	U	Biopolymer transport proteins	GO:0005575,GO:0005623,GO:0005886,GO:0005887,GO:0006810,GO:0008104,GO:0008150,GO:0015031,GO:0015833,GO:0016020,GO:0016021,GO:0017038,GO:0031224,GO:0031226,GO:0033036,GO:0042886,GO:0044425,GO:0044459,GO:0044464,GO:0045184,GO:0051179,GO:0051234,GO:0071702,GO:0071705,GO:0071944	ko:K03562
SMc01184		132.22	173.97	137.95	51.5	55.27	55.22	148.047	53.9967	-1.4551	3.19e-51	9.22e-50	S	Protein of unknown function (DUF1214)	-	-
SMb20592		72.01	79.04	82.02	21.3	19.35	17.57	77.69	19.4067	-2.0012	4.23e-51	1.22e-49	K	Belongs to the sigma-70 factor family. ECF subfamily	-	ko:K03088
SMc01504	phyR	43.73	36.72	31.85	237.38	244.13	234.7	37.4333	238.737	2.673	7.02e-51	2.01e-49	T	response regulator	-	-
SMc03825		30.62	31.77	31.31	208.73	189.32	192.65	31.2333	196.9	2.6563	7.83e-51	2.23e-49	EGP	Sugar (and other) transporter	-	ko:K07552
SMc00768	aceA	19.07	19.4	18.06	171.16	128.51	184.5	18.8433	161.39	3.0984	2.43e-50	6.85e-49	C	Isocitrate lyase	-	ko:K01637
SMb20712	mglB	29.84	29.95	31.31	197.5	203.13	178.85	30.3667	193.16	2.6692	9.07e-50	2.53e-48	G	ABC-type sugar transport system, periplasmic component	-	ko:K10439,ko:K17213
SMc03016	agrR	88.88	110.43	110.66	32.92	32.7	26.98	103.323	30.8667	-1.743	9.78e-50	2.72e-48	K	transcriptional regulator	-	-
SMb21647	agpA	118.08	148.58	137.82	46.86	44.68	56.48	134.827	49.34	-1.4503	1.01e-49	2.79e-48	E	ABC-type dipeptide transport system, periplasmic component	GO:0005575,GO:0005623,GO:0042597,GO:0044464	ko:K02035
SMb21135		46.97	48.7	44.16	244.35	277.76	301.85	46.61	274.653	2.5589	1.36e-49	3.72e-48	ET	belongs to the bacterial solute-binding protein 3 family	-	ko:K02030
SMb20170	adhI	5.32	4.43	5.75	73.96	67.25	100.41	5.16667	80.54	3.9624	1.53e-49	4.19e-48	C	Zinc-binding dehydrogenase	GO:0005575,GO:0005622,GO:0005623,GO:0005737,GO:0006066,GO:0008150,GO:0008152,GO:0015945,GO:0034308,GO:0044281,GO:0044424,GO:0044464,GO:0071704,GO:1901615	ko:K00121
SMc01425		193.34	195.46	201.78	85.97	106.4	96.01	196.86	96.1267	-1.0342	1.71e-49	4.64e-48	E	LysE type translocator	-	-
SMb21543		110.16	126.96	139.42	36.79	37.77	50.2	125.513	41.5867	-1.5936	1.94e-49	5.25e-48	Q	Zinc-dependent metalloprotease	-	-
SMc00491		58.78	85.16	76.4	13.55	13.36	11.3	73.4467	12.7367	-2.5277	4.2e-49	1.13e-47	S	Domain of unknown function (DUF1127)	-	-
SMc03096	tamB	301.42	287.13	292.23	1423.13	1254.73	1304.65	293.593	1327.5	2.1768	4.37e-49	1.17e-47	S	protein conserved in bacteria	-	ko:K09800
SMc03018	flhB	78.24	91.02	79.48	23.62	24.87	27.61	82.9133	25.3667	-1.7087	6.19e-49	1.65e-47	N	Required for formation of the rod structure in the basal body of the flagellar apparatus. Together with FliI and FliH, may constitute the export apparatus of flagellin	-	ko:K02401
SMb21300	deoC	172.58	211.21	196.16	66.61	76.46	94.76	193.317	79.2767	-1.286	1.39e-48	3.71e-47	F	Catalyzes a reversible aldol reaction between acetaldehyde and D-glyceraldehyde 3-phosphate to generate 2-deoxy- D-ribose 5-phosphate	-	ko:K01619
SMc00275		177.51	201.32	178.49	89.84	88.9	99.15	185.773	92.63	-1.004	1.98e-48	5.22e-47	K	LysR substrate binding domain	-	ko:K03566
SMa1670	arcA	95.24	95.19	114.8	28.27	32.24	36.4	101.743	32.3033	-1.6552	2.09e-48	5.48e-47	E	Arginine	-	ko:K01478
SMc00810	ppx	87.98	75.14	58.47	436.04	453.25	448.06	73.8633	445.783	2.5934	5.03e-48	1.31e-46	FP	Exopolyphosphatase	-	ko:K01524
SMc01765	MA20_36685	53.98	58.47	57.8	284.63	332.57	334.48	56.75	317.227	2.4828	5.37e-48	1.4e-46	S	membrane protein domain	-	-
SMc02146	pstS	46.58	56.12	49.37	376.4	293.42	443.67	50.69	371.163	2.8723	7.51e-48	1.95e-46	P	ABC-type phosphate transport system, periplasmic component	-	ko:K02040
SMb20593	MA20_42090	62.93	62.77	58.07	12	16.12	10.67	61.2567	12.93	-2.2441	9.65e-48	2.49e-46	S	Domain of unknown function (DUF4142)	-	ko:K08995
SMb21207		10.64	14.06	11.11	110.75	100.42	106.05	11.9367	105.74	3.147	2.76e-47	7.11e-46	M	secretion protein	-	ko:K01993
SMc00885		318.42	323.72	291.69	1567.96	1424.7	1318.46	311.277	1437.04	2.2068	4.13e-47	1.05e-45	S	PRC-barrel domain	-	-
SMc00141	MA20_43500	125.86	102.22	89.65	552.21	600.65	652.64	105.91	601.833	2.5065	6.64e-47	1.69e-45	M	Belongs to the ompA family	-	-
SMc01411		171.41	191.29	204.18	84.81	83.37	94.76	188.96	87.6467	-1.1083	7.75e-47	1.96e-45	-	-	-	-
SMa2395		466.99	614.11	595.43	245.9	254.26	294.94	558.843	265.033	-1.0763	1.63e-46	4.11e-45	D	Cellulose biosynthesis protein BcsQ	-	-
SMc00932	mutL	432.61	633.12	572.15	252.48	215.57	230.31	545.96	232.787	-1.2298	4.57e-46	1.14e-44	L	This protein is involved in the repair of mismatches in DNA. It is required for dam-dependent methyl-directed DNA mismatch repair. May act as a molecular matchmaker , a protein that promotes the formation of a stable complex between two or more DNA-binding proteins in an ATP-dependent manner without itself being part of a final effector complex	GO:0003674,GO:0003676,GO:0003677,GO:0003697,GO:0003824,GO:0005488,GO:0005575,GO:0005622,GO:0005623,GO:0006139,GO:0006259,GO:0006281,GO:0006298,GO:0006725,GO:0006807,GO:0006950,GO:0006974,GO:0008150,GO:0008152,GO:0009987,GO:0016462,GO:0016787,GO:0016817,GO:0016818,GO:0016887,GO:0017111,GO:0032300,GO:0032991,GO:0033554,GO:0034641,GO:0043170,GO:0044237,GO:0044238,GO:0044260,GO:0044424,GO:0044464,GO:…	ko:K03572
SMc00822		237.58	360.05	287.14	123.14	117.46	102.92	294.923	114.507	-1.3649	6.5e-46	1.62e-44	S	HigB_toxin, RelE-like toxic component of a toxin-antitoxin system	-	ko:K19166
SMc02822	tadC	117.82	160.43	147.18	46.47	54.81	55.22	141.81	52.1667	-1.4428	6.97e-46	1.73e-44	NU	type II secretion system protein	-	ko:K12511
SMc02439		67.73	78.78	80.55	20.14	21.19	23.85	75.6867	21.7267	-1.8006	8.76e-46	2.15e-44	H	RibD C-terminal domain	-	-
SMb20435	eutE	38.28	35.42	32.25	194.01	222.02	201.44	35.3167	205.823	2.543	1.08e-45	2.65e-44	S	succinylglutamate desuccinylase aspartoacylase	-	ko:K06987,ko:K15784
SMc02875		12.72	14.06	13.65	110.37	104.1	103.54	13.4767	106.003	2.9756	2.66e-45	6.49e-44	G	N-acetylglucosamine kinase	-	ko:K18676
SMc04023	galU	116.91	108.08	111.99	528.2	488.72	550.35	112.327	522.423	2.2175	2.89e-45	7.03e-44	M	UTP-glucose-1-phosphate uridylyltransferase	-	ko:K00963
SMb20333		185.55	205.74	223.85	94.49	95.81	106.68	205.047	98.9933	-1.0505	3.48e-45	8.39e-44	M	Belongs to the BCCT transporter (TC 2.A.15) family	-	ko:K02168
SMb21184	ackA	10.51	10.29	9.9	87.52	93.51	87.86	10.2333	89.63	3.1307	4.76e-45	1.14e-43	C	Catalyzes the formation of acetyl phosphate from acetate and ATP. Can also catalyze the reverse reaction	-	ko:K00925
SMc00519	MA20_09420	31.53	35.68	29.84	213.76	178.72	206.46	32.35	199.647	2.6256	4.99e-45	1.19e-43	H	MobA-like NTP transferase domain	-	ko:K07141
SMb21010	bdhA2	24.65	22.92	23.15	138.25	159.84	161.9	23.5733	153.33	2.7014	5.38e-45	1.28e-43	IQ	Dehydrogenases with different specificities (related to short-chain alcohol dehydrogenases)	-	ko:K00019
SMa0872		318.16	200.02	239.24	85.19	105.94	89.11	252.473	93.4133	-1.4344	6.27e-45	1.48e-43	#N/A	#N/A	#N/A	#N/A
SMc01725		38.8	42.58	31.71	282.3	211.89	271.72	37.6967	255.303	2.7597	6.95e-45	1.64e-43	S	Anti-sigma-K factor rskA	-	-
SMc00562		6.75	4.82	5.62	72.42	86.6	61.5	5.73	73.5067	3.6813	1.97e-44	4.62e-43	K	helix_turn_helix multiple antibiotic resistance protein	-	ko:K06075
SMc01453		102.9	144.02	146.65	42.21	42.38	45.81	131.19	43.4667	-1.5937	2.34e-44	5.48e-43	L	FOG Transposase and inactivated derivatives	-	ko:K07495
SMc02901		78.89	79.43	84.43	24.78	31.78	26.98	80.9167	27.8467	-1.5389	2.86e-44	6.66e-43	E	glyoxalase	-	-
SMc04197		67.21	68.36	69.58	17.43	18.89	25.1	68.3833	20.4733	-1.7399	3.26e-44	7.56e-43	L	Bacterial dnaA protein helix-turn-helix domain	-	ko:K02313
SMb20902	xylF	105.49	61.46	66.23	593.26	608.02	545.33	77.7267	582.203	2.905	5.77e-44	1.33e-42	G	ABC transporter	GO:0003674,GO:0005488,GO:0005575,GO:0005623,GO:0005975,GO:0005996,GO:0006810,GO:0008150,GO:0008152,GO:0008643,GO:0015749,GO:0015750,GO:0015753,GO:0019321,GO:0030246,GO:0030288,GO:0030313,GO:0031975,GO:0034219,GO:0036094,GO:0042597,GO:0042732,GO:0044238,GO:0044281,GO:0044464,GO:0048029,GO:0051179,GO:0051234,GO:0055085,GO:0071702,GO:0071704	ko:K10543
SMb21208		39.97	35.16	39.34	206.79	222.02	207.71	38.1567	212.173	2.4752	1.31e-43	3e-42	K	Domain of unknown function (DUF1956)	-	-
SMc02888		31.66	30.99	27.83	172.71	171.35	171.95	30.16	172.003	2.5117	2.5e-43	5.65e-42	K	helix_turn_helix, arabinose operon control protein	-	-
SMb20003	proC	65.79	79.43	76.27	18.98	21.19	26.36	73.83	22.1767	-1.7352	2.7e-43	6.09e-42	E	NADP oxidoreductase coenzyme F420-dependent	-	ko:K00286
SMc03762		272.23	372.55	358.19	151.8	156.15	161.28	334.323	156.41	-1.0959	2.93e-43	6.58e-42	#N/A	#N/A	#N/A	#N/A
SMc04311		301.55	407.19	375.99	176.58	179.64	182.61	361.577	179.61	-1.0094	2.96e-43	6.62e-42	E	ABC-type proline glycine betaine transport systems, periplasmic components	-	ko:K02002
SMc00591		99	120.32	120.56	548.34	638.88	616.24	113.293	601.153	2.4077	3.01e-43	6.71e-42	#N/A	#N/A	#N/A	#N/A
SMa0985		63.71	87.38	77.61	14.72	17.5	25.73	76.2333	19.3167	-1.9806	4.32e-43	9.58e-42	K	Transcriptional regulator	-	-
SMc04196		64.88	65.89	65.3	17.43	19.35	23.22	65.3567	20	-1.7083	4.69e-43	1.03e-41	-	-	-	-
SMc02521	glpR	40.09	58.47	47.37	294.31	300.33	352.05	48.6433	315.563	2.6976	9.79e-43	2.15e-41	K	Transcriptional	-	ko:K02444
SMb20587	catI	12.72	15.76	15.25	121.98	100.42	126.13	14.5767	116.177	2.9946	1.06e-42	2.32e-41	I	Coenzyme A transferase	-	ko:K01039
SMc03100		62.41	57.43	42.42	317.15	310.46	306.87	54.0867	311.493	2.5259	1.08e-42	2.36e-41	S	Glycine-zipper domain	-	-
SMa1454		112.5	133.08	116.01	44.92	58.04	54.6	120.53	52.52	-1.1985	2.02e-42	4.38e-41	K	Arabinose-binding domain of AraC transcription regulator, N-term	-	-
SMc02520	glpD	52.16	57.69	51.78	252.48	295.72	300.59	53.8767	282.93	2.3927	3.53e-42	7.66e-41	C	Belongs to the FAD-dependent glycerol-3-phosphate dehydrogenase family	-	ko:K00111,ko:K21054
SMb20846	xdhB	29.07	30.34	34.92	182.39	204.98	184.5	31.4433	190.623	2.5999	3.73e-42	8.06e-41	F	Xanthine dehydrogenase	-	ko:K13482
SMc01185		104.32	126.44	103.16	50.34	46.52	40.79	111.307	45.8833	-1.2785	4.93e-42	1.06e-40	S	Protein of unknown function (DUF1254)	-	-
SMc01165	iolC	31.4	32.55	33.72	185.1	173.65	192.65	32.5567	183.8	2.4971	6.24e-42	1.33e-40	G	Uncharacterized protein conserved in bacteria (DUF2090)	-	ko:K03338
SMc00286		47.49	42.58	43.22	248.22	215.57	266.7	44.43	243.497	2.4543	7.41e-42	1.58e-40	Q	COG2931 RTX toxins and related Ca2 -binding proteins	-	-
SMc02177		27.77	28.26	28.63	154.51	173.19	164.41	28.22	164.037	2.5392	8.72e-42	1.85e-40	S	FecR protein	-	-
SMb20436	narK	92.91	100.66	107.44	37.95	35.47	47.69	100.337	40.37	-1.3135	1.66e-41	3.52e-40	P	Transporter	-	ko:K02575
SMb20032		14.4	11.07	12.85	92.94	122.06	102.92	12.7733	105.973	3.0525	1.69e-41	3.57e-40	S	amine dehydrogenase activity	-	-
SMc04314	MA20_35940	96.8	120.58	113.73	44.15	48.83	42.67	110.37	45.2167	-1.2874	1.84e-41	3.88e-40	S	Tautomerase enzyme	-	ko:K01821
SMa2257		49.96	49.74	40.41	247.06	243.21	235.33	46.7033	241.867	2.3726	3.93e-41	8.18e-40	L	Belongs to the 'phage' integrase family	-	-
SMc04459	ftsH	1778.83	1975.67	1817.99	7027.75	7226.7	7457.65	1857.5	7237.37	1.9621	4.61e-41	9.57e-40	O	Acts as a processive, ATP-dependent zinc metallopeptidase for both cytoplasmic and membrane proteins. Plays a role in the quality control of integral membrane proteins	-	ko:K03798
SMa0775		164.01	126.83	134.87	68.16	65.41	67.77	141.903	67.1133	-1.0802	5.36e-41	1.1e-39	#N/A	#N/A	#N/A	#N/A
SMb20899	idhA	16.61	14.58	16.73	121.6	101.8	133.67	15.9733	119.023	2.8975	5.56e-41	1.14e-39	S	2-dehydrogenase	-	ko:K00010
SMb21357		7.01	8.59	7.09	73.96	76.92	68.4	7.56333	73.0933	3.2726	1.05e-40	2.14e-39	S	Predicted membrane protein (DUF2231)	-	-
SMb20521		76.43	96.49	94.73	30.21	34.55	30.75	89.2167	31.8367	-1.4866	1.08e-40	2.18e-39	S	NADPH-dependent FMN reductase	-	-
SMc04243	znuB	27.12	28.65	23.68	143.28	173.19	166.92	26.4833	161.13	2.6051	1.46e-40	2.95e-39	P	ABC-type Mn2 Zn2 transport systems, permease components	GO:0000006,GO:0000041,GO:0003674,GO:0005215,GO:0005385,GO:0005575,GO:0005623,GO:0005886,GO:0006810,GO:0006811,GO:0006812,GO:0006829,GO:0008150,GO:0008324,GO:0010035,GO:0010038,GO:0010043,GO:0015075,GO:0015318,GO:0016020,GO:0022857,GO:0022890,GO:0030001,GO:0034220,GO:0042221,GO:0044464,GO:0046873,GO:0046915,GO:0050896,GO:0051179,GO:0051234,GO:0055085,GO:0070838,GO:0071577,GO:0071944,GO:0072509,GO:…	ko:K09816
SMc03842		56.05	51.31	55.13	8.13	12.9	16.94	54.1633	12.6567	-2.0974	1.48e-40	2.96e-39	J	glyoxalase III activity	-	-
SMc03254		67.73	66.8	69.85	25.56	22.57	21.34	68.1267	23.1567	-1.5568	1.48e-40	2.96e-39	-	-	-	-
SMb20914		76.69	100.27	94.87	22.46	35.01	30.75	90.61	29.4067	-1.6235	1.58e-40	3.15e-39	C	Putative MetA-pathway of phenol degradation	-	-
SMc02902		89.66	94.93	97.14	41.44	41	40.79	93.91	41.0767	-1.193	1.89e-40	3.75e-39	K	transcriptional regulator	-	-
SMc00612	acvB	3.63	2.86	2.94	47.63	55.74	50.2	3.14333	51.19	4.0255	1.98e-40	3.93e-39	U	Type IV secretory pathway, VirJ component	-	-
SMc01983	coxN	244.98	289.87	336.38	133.99	122.53	150.61	290.41	135.71	-1.0976	5.47e-40	1.08e-38	C	Cytochrome c oxidase is the component of the respiratory chain that catalyzes the reduction of oxygen to water. Subunits 1- 3 form the functional core of the enzyme complex. CO I is the catalytic subunit of the enzyme. Electrons originating in cytochrome c are transferred via the copper A center of subunit 2 and heme A of subunit 1 to the bimetallic center formed by heme A3 and copper B	GO:0005575,GO:0005623,GO:0005886,GO:0006091,GO:0006810,GO:0006811,GO:0006812,GO:0008150,GO:0008152,GO:0009060,GO:0009987,GO:0015672,GO:0015980,GO:0015988,GO:0015990,GO:0016020,GO:0022900,GO:0022904,GO:0034220,GO:0044237,GO:0044464,GO:0045333,GO:0051179,GO:0051234,GO:0055085,GO:0055114,GO:0071944,GO:0098655,GO:0098660,GO:0098662,GO:1902600	ko:K02274
SMc03843		61.76	63.68	64.63	20.91	22.11	18.83	63.3567	20.6167	-1.6197	5.6e-40	1.1e-38	K	transcriptional	-	-
SMc02654	acpS	145.72	172.02	143.17	56.93	83.83	56.48	153.637	65.7467	-1.2245	6.47e-40	1.27e-38	I	Transfers the 4'-phosphopantetheine moiety from coenzyme A to a Ser of acyl-carrier-protein	-	ko:K00997
SMb21440		59.82	46.49	45.23	274.17	259.79	315.02	50.5133	282.993	2.486	7.04e-40	1.38e-38	S	Domain of unknown function (DUF4168)	-	-
SMc02877		39.19	40.63	35.32	188.2	203.59	210.22	38.38	200.67	2.3864	7.78e-40	1.52e-38	M	glucosamine-fructose-6-phosphate aminotransferase	-	ko:K00820
SMa2213		26.34	27.35	30.51	158	163.98	193.91	28.0667	171.963	2.6152	8.2e-40	1.6e-38	C	Belongs to the aldehyde dehydrogenase family	-	ko:K00128
SMc03999		320.89	281.79	275.5	1174.52	1343.63	1491.03	292.727	1336.39	2.1907	8.83e-40	1.71e-38	S	Protein of unknown function (DUF465)	-	-
SMc04206		107.05	111.21	126.98	44.92	52.05	55.22	115.08	50.73	-1.1817	1.05e-39	2.04e-38	Q	calcium- and calmodulin-responsive adenylate cyclase activity	-	-
SMc02170	frcC	70.59	67.71	61.01	355.88	387.38	296.2	66.4367	346.487	2.3827	1.08e-39	2.08e-38	G	Belongs to the binding-protein-dependent transport system permease family	-	ko:K10553
SMc00769		38.93	38.81	39.61	187.43	220.18	214.62	39.1167	207.41	2.4066	1.73e-39	3.31e-38	K	transcriptional	-	ko:K07110
SMc00458	feuP	49.18	39.72	40.81	218.02	227.09	260.43	43.2367	235.18	2.4434	2.12e-39	4.03e-38	T	Response regulators consisting of a CheY-like receiver domain and a winged-helix DNA-binding domain	-	ko:K02483
SMa2233		64.23	99.23	86.3	21.69	25.79	23.22	83.2533	23.5667	-1.8208	2.14e-39	4.06e-38	#N/A	#N/A	#N/A	#N/A
SMc01590		19.59	18.49	21.68	137.09	119.76	131.16	19.92	129.337	2.6988	2.17e-39	4.11e-38	T	protein with a bacterial SH3 domain	-	-
SMc01266		80.97	90.63	90.05	425.58	380.47	426.73	87.2167	410.927	2.2362	4.16e-39	7.83e-38	S	Belongs to the UPF0229 family	-	ko:K09786
SMb20151		39.45	72.14	64.49	3.49	2.3	2.51	58.6933	2.76667	-4.407	5.92e-39	1.1e-37	T	Dual specificity phosphatase, catalytic domain	-	-
SMc02981		97.97	114.59	103.83	46.86	53.43	40.16	105.463	46.8167	-1.1716	8.16e-39	1.52e-37	E	Lysine exporter protein	GO:0003333,GO:0003674,GO:0005215,GO:0005342,GO:0005575,GO:0005623,GO:0005886,GO:0006810,GO:0006811,GO:0006820,GO:0006865,GO:0008150,GO:0008509,GO:0008514,GO:0015075,GO:0015171,GO:0015175,GO:0015179,GO:0015318,GO:0015711,GO:0015804,GO:0015807,GO:0015849,GO:0016020,GO:0022857,GO:0034220,GO:0042968,GO:0042970,GO:0044464,GO:0046942,GO:0046943,GO:0051179,GO:0051234,GO:0055085,GO:0071702,GO:0071705,GO:…	-
SMa0791		9.99	8.07	7.89	78.22	79.23	70.28	8.65	75.91	3.1335	9.54e-39	1.77e-37	S	Amino acid synthesis	-	-
SMc01708		119.9	159.13	135.28	54.99	65.87	65.89	138.103	62.25	-1.1496	9.96e-39	1.84e-37	UW	YadA-like membrane anchor domain	-	ko:K19232,ko:K21449
SMc06737		45.29	49.61	53.39	271.46	241.83	259.17	49.43	257.487	2.381	1.06e-38	1.95e-37	S	Protein of unknown function (DUF1194)	-	-
SMc06985		164.27	221.5	222.25	93.71	94.43	92.88	202.673	93.6733	-1.1134	1.24e-38	2.26e-37	L	transposase activity	-	ko:K07497
SMc00084		13.75	15.11	13.11	112.3	88.44	109.82	13.99	103.52	2.8874	1.52e-38	2.76e-37	-	-	-	-
SMc00024	smc	65.14	52.22	55.8	297.02	291.57	271.1	57.72	286.563	2.3117	1.68e-38	3.05e-37	D	Required for chromosome condensation and partitioning	-	ko:K03529
SMa2107		115.74	141.42	130.19	46.86	59.42	67.77	129.117	58.0167	-1.1541	1.98e-38	3.58e-37	K	LysR substrate binding domain	-	-
SMc04388	MA20_09775	41.39	47.01	36.66	255.97	211.43	222.78	41.6867	230.06	2.4644	2.09e-38	3.78e-37	E	Belongs to the class-III pyridoxal-phosphate-dependent aminotransferase family	-	ko:K00822
SMc00477		99.13	101.31	94.47	48.79	43.76	51.46	98.3033	48.0033	-1.0341	3.03e-38	5.45e-37	S	Protein of unknown function (DUF1254)	-	-
SMb20150		38.02	68.1	54.86	2.71	4.15	2.51	53.66	3.12333	-4.1027	3.71e-38	6.64e-37	G	inositol mono-phosphatase	-	ko:K01092
SMc01216		2.98	1.95	2.81	41.05	52.51	47.69	2.58	47.0833	4.1898	5.75e-38	1.02e-36	-	-	-	-
SMc02078	exoR	58.65	49.35	47.63	285.4	252.88	249.13	51.8767	262.47	2.339	6.31e-38	1.12e-36	S	Exopolysaccharide production negative regulator	-	ko:K07126
SMc02021		18.68	19.79	19.54	113.46	122.53	121.11	19.3367	119.033	2.622	8.18e-38	1.44e-36	G	Periplasmic binding protein domain	-	ko:K02058,ko:K10439
SMb21196	oppA	59.95	64.98	64.09	279.98	290.65	311.26	63.0067	293.963	2.2221	8.85e-38	1.56e-36	E	ABC transporter substrate-binding protein	-	ko:K02035,ko:K15580
SMc04431		85.38	123.84	108.78	39.5	37.77	42.67	106	39.98	-1.4067	9.47e-38	1.66e-36	S	Ribonuclease toxin, BrnT, of type II toxin-antitoxin system	-	ko:K09803
SMc04340		99.39	128.66	126.44	49.95	51.13	53.34	118.163	51.4733	-1.1989	1.18e-37	2.06e-36	E	Methylenetetrahydrofolate reductase	-	-
SMa1078		2.6	4.56	4.55	44.53	81.53	74.68	3.90333	66.9133	4.0995	1.19e-37	2.08e-36	S	Domain of unknown function (DUF378)	-	ko:K09779
SMc02656		64.88	70.84	90.72	21.3	21.19	26.36	75.48	22.95	-1.7176	1.43e-37	2.49e-36	S	Protein of unknown function (DUF3563)	-	-
SMc01813		66.18	62.77	67.44	284.63	346.39	317.53	65.4633	316.183	2.272	1.47e-37	2.56e-36	L	Endonuclease/Exonuclease/phosphatase family	-	-
SMb20072		16.61	13.93	15.52	116.56	93.51	135.55	15.3533	115.207	2.9076	2.12e-37	3.64e-36	G	Periplasmic binding proteins and sugar binding domain of LacI family	-	ko:K10439,ko:K17213
SMc00525	MA20_30770	97.97	85.81	88.85	402.74	375.41	414.17	90.8767	397.44	2.1288	3.28e-37	5.63e-36	S	Protein of unknown function	-	-
SMb20152		102.51	164.86	139.42	12	8.29	16.32	135.597	12.2033	-3.474	3.6e-37	6.15e-36	S	Calcineurin-like phosphoesterase	-	-
SMc02878	nagA	44.51	41.8	36.66	215.7	191.62	222.15	40.99	209.823	2.3558	3.96e-37	6.75e-36	G	Belongs to the metallo-dependent hydrolases superfamily. NagA family	GO:0003674,GO:0003824,GO:0005488,GO:0006040,GO:0006044,GO:0006046,GO:0006054,GO:0006082,GO:0008150,GO:0008152,GO:0008270,GO:0008448,GO:0009056,GO:0009987,GO:0016043,GO:0016054,GO:0016787,GO:0016810,GO:0016811,GO:0016999,GO:0017001,GO:0017144,GO:0019213,GO:0019262,GO:0019752,GO:0022607,GO:0042737,GO:0043167,GO:0043169,GO:0043436,GO:0043933,GO:0044085,GO:0044237,GO:0044248,GO:0044281,GO:0044282,GO:…	ko:K01443
SMc00470		58.13	50.79	47.37	253.26	262.09	237.84	52.0967	251.063	2.2688	4.34e-37	7.38e-36	NU	Flagellar biosynthesis protein, FliO	-	-
SMb21286	xdhA	22.58	30.99	20.07	162.26	152.47	165.67	24.5467	160.133	2.7057	4.97e-37	8.42e-36	F	Xanthine dehydrogenase	-	ko:K13481
SMc00818	oxyR	129.63	174.75	151.87	692.4	824.05	829.6	152.083	782.017	2.3623	5.76e-37	9.74e-36	K	Transcriptional regulator	-	ko:K04761
SMc04337		53.2	61.2	57	17.81	17.04	20.08	57.1333	18.31	-1.6417	5.93e-37	1e-35	S	Virulence factor	-	-
SMa2217		24	28.52	27.03	149.09	143.71	168.18	26.5167	153.66	2.5348	7.08e-37	1.19e-35	H	3-octaprenyl-4-hydroxybenzoate carboxy-lyase	-	-
SMb21432		41.65	35.55	32.51	181.23	196.69	195.79	36.57	191.237	2.3866	7.41e-37	1.24e-35	P	ABC-type Fe3 -hydroxamate transport system, periplasmic component	-	ko:K02016
SMb21494	arcB	31.01	30.73	30.37	159.55	154.31	180.73	30.7033	164.863	2.4248	7.41e-37	1.24e-35	E	ornithine cyclodeaminase	-	ko:K01750
SMc01659		24.26	18.49	21.01	127.4	140.03	125.51	21.2533	130.98	2.6236	9.46e-37	1.58e-35	P	Periplasmic binding protein	-	ko:K02016
SMc00811	ftsJ	29.97	22.01	24.22	176.97	155.69	141.82	25.4	158.16	2.6385	1.32e-36	2.18e-35	J	Specifically methylates the uridine in position 2552 of 23S rRNA at the 2'-O position of the ribose in the fully assembled 50S ribosomal subunit	-	ko:K02427
SMa1403		4.8	6.25	4.95	56.15	54.35	64.64	5.33333	58.38	3.4524	1.73e-36	2.86e-35	C	Aldo/keto reductase family	-	ko:K00064
SMc03131		40.09	32.42	29.84	178.13	182.41	207.09	34.1167	189.21	2.4714	1.76e-36	2.9e-35	ET	Bacterial periplasmic substrate-binding proteins	-	ko:K02030
SMa0101		13.75	10.68	10.17	85.19	81.99	97.9	11.5333	88.36	2.9376	2.72e-36	4.47e-35	S	Amidohydrolase family	-	-
SMb20901	xylR	5.58	4.43	6.56	51.5	67.25	68.4	5.52333	62.3833	3.4975	4.26e-36	6.97e-35	GK	ROK family	-	-
SMc02513		63.71	73.96	69.44	303.21	316.45	349.54	69.0367	323.067	2.2264	4.98e-36	8.13e-35	F	Permease family	-	ko:K03458
SMa2219	ubiX	6.62	4.56	4.28	55.76	59.88	55.85	5.15333	57.1633	3.4715	5.03e-36	8.2e-35	H	Flavoprotein	-	ko:K03186
SMc02710	fic	58.78	63.68	68.78	12.78	24.87	20.71	63.7467	19.4533	-1.7123	5.39e-36	8.76e-35	D	Fic/DOC family	-	ko:K04095
SMc01905	lon	1726.15	1780.6	1576.34	5855.94	6580.91	6733.47	1694.36	6390.11	1.9151	8.54e-36	1.38e-34	O	ATP-dependent serine protease that mediates the selective degradation of mutant and abnormal proteins as well as certain short-lived regulatory proteins. Required for cellular homeostasis and for survival from DNA damage and developmental changes induced by stress. Degrades polypeptides processively to yield small peptide fragments that are 5 to 10 amino acids long. Binds to DNA in a double-stran…	-	ko:K01338
SMa1332		43.08	61.33	52.45	14.72	10.59	10.67	52.2867	11.9933	-2.1242	1.64e-35	2.62e-34	S	Phosphoenolpyruvate hydrolase-like	-	-
SMc02361	cycH	70.85	64.85	56.47	310.18	307.23	275.49	64.0567	297.633	2.2161	1.72e-35	2.74e-34	O	biogenesis protein	-	ko:K02200
SMb21284	pucL	32.31	45.58	29.17	216.08	220.64	292.43	35.6867	243.05	2.7678	1.8e-35	2.86e-34	G	OHCU decarboxylase	-	ko:K00365,ko:K01452
SMc04432		109.77	150.4	133.4	62.73	52.97	63.38	131.19	59.6933	-1.136	2.04e-35	3.24e-34	S	BrnA antitoxin of type II toxin-antitoxin system	-	-
SMb21433		39.97	29.82	31.71	170.78	243.21	219.01	33.8333	211	2.6407	3.24e-35	5.1e-34	Q	Methyltransferase	-	-
SMc00949	hspQ	1024.04	1034.97	900.63	3495.28	3495.66	3635.32	986.547	3542.09	1.8441	4.61e-35	7.25e-34	S	DNA-binding protein	-	ko:K11940
SMc04460	glgP	242.26	237	237.9	874.4	887.16	886.71	239.053	882.757	1.8847	4.96e-35	7.78e-34	G	Phosphorylase is an important allosteric enzyme in carbohydrate metabolism. Enzymes from different sources differ in their regulatory mechanisms and in their natural substrates. However, all known phosphorylases share catalytic and structural properties	GO:0000272,GO:0003674,GO:0003824,GO:0004645,GO:0005488,GO:0005575,GO:0005622,GO:0005623,GO:0005737,GO:0005975,GO:0005976,GO:0005977,GO:0005980,GO:0006073,GO:0006091,GO:0006112,GO:0008144,GO:0008150,GO:0008152,GO:0008184,GO:0009056,GO:0009057,GO:0009251,GO:0009987,GO:0015980,GO:0016052,GO:0016740,GO:0016757,GO:0016758,GO:0019842,GO:0030170,GO:0036094,GO:0043167,GO:0043168,GO:0043170,GO:0044042,GO:…	ko:K00688
SMa1334		54.76	72.79	67.97	19.36	14.28	26.36	65.1733	20	-1.7043	5.05e-35	7.89e-34	S	Uncharacterised protein family (UPF0261)	-	-
SMc00045	cycF	58.65	52.09	50.04	231.19	261.63	252.27	53.5933	248.363	2.2123	5.5e-35	8.58e-34	C	Cytochrome c556	-	-
SMb21578	actP	46.32	51.18	54.19	270.3	228.93	293.69	50.5633	264.307	2.386	7.82e-35	1.22e-33	P	Cation transport ATPase	-	ko:K17686
SMc00147		13.24	19.92	11.24	101.07	161.22	142.45	14.8	134.913	3.1884	9.36e-35	1.45e-33	S	Serine aminopeptidase, S33	-	-
SMc04191		42.69	58.21	54.46	12	14.28	13.81	51.7867	13.3633	-1.9543	9.46e-35	1.46e-33	-	-	-	-
SMa2051		15.83	13.67	14.99	89.84	99.03	102.29	14.83	97.0533	2.7103	9.51e-35	1.46e-33	I	Fatty acid hydroxylase superfamily	-	-
SMb20758	phnF	4.67	6.51	5.49	51.89	64.03	58.36	5.55667	58.0933	3.3861	1.22e-34	1.88e-33	K	transcriptional regulator	-	ko:K02043
SMc01510	hmuV	8.3	13.02	9.77	84.42	87.52	78.44	10.3633	83.46	3.0096	1.24e-34	1.9e-33	P	Part of the ABC transporter complex HmuTUV involved in hemin import. Responsible for energy coupling to the transport system	-	ko:K02013
SMb21185	gabD	19.2	18.62	19.4	117.72	117.92	104.17	19.0733	113.27	2.5701	1.26e-34	1.93e-33	C	Belongs to the aldehyde dehydrogenase family	-	ko:K00135
SMc04085	gdhB	392.77	360.83	343.74	1522.65	1343.63	1369.29	365.78	1411.86	1.9485	2.12e-34	3.24e-33	E	NAD-specific glutamate dehydrogenase	GO:0003674,GO:0003824,GO:0004352,GO:0004353,GO:0008150,GO:0008152,GO:0016491,GO:0016638,GO:0016639,GO:0055114	ko:K15371
SMb20230		58.13	51.05	53.92	243.19	280.06	240.35	54.3667	254.533	2.2271	3.28e-34	4.98e-33	K	helix_turn _helix lactose operon repressor	-	-
SMb21287	xdhB	32.57	35.16	35.46	177.75	163.98	210.22	34.3967	183.983	2.4192	4.07e-34	6.16e-33	F	Aldehyde oxidase and xanthine dehydrogenase, a/b hammerhead domain	-	ko:K13482
SMc00861	MA20_42300	394.2	391.7	350.43	1499.8	1383.71	1361.76	378.777	1415.09	1.9015	4.23e-34	6.39e-33	M	FOG TPR repeat	-	-
SMb20772	pdxA_2	37.76	43.1	50.58	228.86	247.81	229.68	43.8133	235.45	2.426	4.4e-34	6.63e-33	H	Pyridoxal phosphate biosynthetic protein PdxA	-	ko:K00097
SMc02876		6.23	7.03	7.76	71.25	64.03	56.48	7.00667	63.92	3.1895	5.77e-34	8.67e-33	K	transcriptional	-	ko:K03710
SMc00809		15.57	13.15	14.85	100.3	85.68	104.17	14.5233	96.7167	2.7354	7e-34	1.05e-32	-	-	-	-
SMa1960		10.9	9.25	9.63	68.54	94.89	75.3	9.92667	79.5767	3.003	1.03e-33	1.53e-32	K	HxlR-like helix-turn-helix	-	-
SMa0025		27.9	27.48	27.56	145.6	140.03	138.69	27.6467	141.44	2.355	2.52e-33	3.72e-32	E	Transglutaminase/protease-like homologues	-	-
SMc00879	kdgR	12.98	11.2	10.84	75.51	86.6	81.58	11.6733	81.23	2.7988	4.26e-33	6.25e-32	K	transcriptional regulator	-	ko:K13641
SMc02172	frcR	18.56	22.66	19.4	121.21	168.13	116.09	20.2067	135.143	2.7416	4.85e-33	7.09e-32	GK	ROK family	-	-
SMc01874	ftsZ	129.5	107.3	101.56	451.92	519.58	562.9	112.787	511.467	2.181	5.39e-33	7.86e-32	D	Essential cell division protein that forms a contractile ring structure (Z ring) at the future cell division site. The regulation of the ring assembly controls the timing and the location of cell division. One of the functions of the FtsZ ring is to recruit other cell division proteins to the septum to produce a new cell wall between the dividing cells. Binds GTP and shows GTPase activity	-	ko:K03531
SMc03169		123.66	119.41	100.35	550.66	462.93	480.07	114.473	497.887	2.1208	5.88e-33	8.51e-32	K	Transcriptional regulator	-	-
SMa1329		39.97	58.21	47.37	11.62	10.13	14.43	48.5167	12.06	-2.0083	5.9e-33	8.52e-32	E	Creatinase/Prolidase N-terminal domain	-	-
SMb22009	acpP	85.25	89.07	98.88	41.05	45.14	47.69	91.0667	44.6267	-1.029	6.44e-33	9.25e-32	IQ	Carrier of the growing fatty acid chain in fatty acid biosynthesis	-	ko:K02078
SMc01764	ate	60.47	59.51	58.87	279.2	248.28	254.15	59.6167	260.543	2.1277	6.7e-33	9.6e-32	O	May conjugate Arg from its aminoacyl-tRNA to the N- termini of proteins containing an N-terminal aspartate or glutamate	GO:0003674,GO:0003824,GO:0004057,GO:0005575,GO:0005622,GO:0005623,GO:0005737,GO:0006464,GO:0006508,GO:0006511,GO:0006807,GO:0008150,GO:0008152,GO:0009056,GO:0009057,GO:0009987,GO:0016598,GO:0016740,GO:0016746,GO:0016755,GO:0019538,GO:0019941,GO:0030163,GO:0036211,GO:0043170,GO:0043412,GO:0043632,GO:0044237,GO:0044238,GO:0044248,GO:0044257,GO:0044260,GO:0044265,GO:0044267,GO:0044424,GO:0044464,GO:…	ko:K21420
SMb20153		38.02	55.73	52.32	9.29	11.52	13.81	48.69	11.54	-2.077	8.71e-33	1.24e-31	P	Na+/Pi-cotransporter	-	ko:K03324
SMb21061		60.47	65.5	73.32	25.56	24.87	29.49	66.43	26.64	-1.3182	1.28e-32	1.82e-31	Q	C-methyltransferase C-terminal domain	-	-
SMb20947	exoX	213.58	270.46	322.07	109.98	124.37	145.59	268.703	126.647	-1.0852	1.66e-32	2.34e-31	S	Exopolysaccharide production repressor	-	ko:K16565
SMa6007		14.66	17.32	17.8	94.1	115.62	106.05	16.5933	105.257	2.6652	1.8e-32	2.54e-31	#N/A	#N/A	#N/A	#N/A
SMc00926	glcF	32.7	32.29	33.58	149.48	183.33	167.55	32.8567	166.787	2.3437	2.19e-32	3.08e-31	C	Glycolate oxidase, iron-sulfur subunit	-	ko:K11473
SMc01600		23.75	27.74	26.23	139.02	131.28	171.32	25.9067	147.207	2.5064	2.25e-32	3.16e-31	E	N-formylglutamate amidohydrolase	-	-
SMa0233	otsA	42.95	56.12	66.23	12.78	16.12	15.06	55.1	14.6533	-1.9108	3.68e-32	5.13e-31	G	Probably involved in the osmoprotection via the biosynthesis of trehalose. Catalyzes the transfer of glucose from UDP-glucose (UDP-Glc) to D-glucose 6-phosphate (Glc-6-P) to form trehalose-6-phosphate. Acts with retention of the anomeric configuration of the UDP-sugar donor	-	ko:K00697
SMc01265		72.14	82.56	77.34	372.53	339.94	314.4	77.3467	342.29	2.1458	3.68e-32	5.13e-31	S	SpoVR family	GO:0006950,GO:0006974,GO:0008150,GO:0009987,GO:0033554,GO:0050896,GO:0051716	ko:K06415
SMa2379	katG	36.72	39.2	33.18	188.2	164.44	176.34	36.3667	176.327	2.2776	3.82e-32	5.31e-31	P	Bifunctional enzyme with both catalase and broad- spectrum peroxidase activity	GO:0000302,GO:0003674,GO:0003824,GO:0004096,GO:0004601,GO:0005488,GO:0005575,GO:0005576,GO:0005622,GO:0005623,GO:0005737,GO:0005829,GO:0006950,GO:0006979,GO:0008150,GO:0008152,GO:0009056,GO:0009636,GO:0009987,GO:0010035,GO:0016209,GO:0016491,GO:0016684,GO:0016999,GO:0017001,GO:0017144,GO:0020037,GO:0033554,GO:0034599,GO:0034614,GO:0035690,GO:0042221,GO:0042493,GO:0042542,GO:0042737,GO:0042743,GO:…	ko:K03782
SMa0841		111.46	88.55	101.29	31.75	53.43	46.44	100.433	43.8733	-1.1948	4.39e-32	6.08e-31	L	Transposase	-	ko:K07497
SMc00065		9.6	8.99	8.16	64.28	64.49	80.95	8.91667	69.9067	2.9709	4.87e-32	6.73e-31	-	-	-	-
SMc02982		148.83	226.84	191.34	91.78	87.52	97.9	189.003	92.4	-1.0324	6.32e-32	8.7e-31	S	Acetyltransferase (GNAT) domain	-	-
SMa0374		6.88	5.73	7.49	54.21	76	58.36	6.7	62.8567	3.2298	6.57e-32	9.02e-31	E	dioxygenase	-	ko:K15975
SMb20077		84.99	99.62	118.02	46.47	34.55	45.81	100.877	42.2767	-1.2547	7.45e-32	1.02e-30	T	Histidine kinase	-	-
SMb20103		57.22	48.83	58.47	16.26	23.49	18.83	54.84	19.5267	-1.4898	2.19e-31	2.98e-30	P	flavoprotein involved in K transport	-	ko:K07222
SMc00129	feuQ	56.31	64.2	60.48	260.62	258.87	256.04	60.33	258.51	2.0993	4.38e-31	5.95e-30	T	Histidine kinase	-	-
SMc02855	sam	174.65	227.88	240.58	91	128.05	92.88	214.37	103.977	-1.0438	1.2e-30	1.62e-29	EG	Permeases of the drug metabolite transporter (DMT) superfamily	-	ko:K15270
SMc00795		29.45	23.83	25.29	143.67	131.28	130.53	26.19	135.16	2.3676	1.99e-30	2.67e-29	S	Glycine zipper 2TM domain	-	-
SMc04244	znuC	90.57	98.58	99.55	367.5	397.06	398.49	96.2333	387.683	2.0103	2e-30	2.67e-29	P	Part of the ABC transporter complex ZnuABC involved in zinc import. Responsible for energy coupling to the transport system	-	ko:K09817
SMc04339		39.45	63.42	63.02	12	14.74	16.94	55.2967	14.56	-1.9252	2.43e-30	3.23e-29	E	Methylene-tetrahydrofolate reductase C terminal	-	-
SMc01467		33.87	37.24	36.66	188.98	164.44	164.41	35.9233	172.61	2.2645	2.65e-30	3.53e-29	#N/A	#N/A	#N/A	#N/A
SMc01666	mdeA	72.66	86.86	74.93	393.05	314.6	350.79	78.15	352.813	2.1746	3.32e-30	4.41e-29	E	methionine gamma-lyase	-	ko:K01739,ko:K01761
SMc02829	yejF	23.75	19.79	22.35	126.24	111.47	117.35	21.9633	118.353	2.4299	3.94e-30	5.22e-29	P	Belongs to the ABC transporter superfamily	GO:0000166,GO:0003674,GO:0003824,GO:0005215,GO:0005488,GO:0005524,GO:0005575,GO:0005623,GO:0005886,GO:0006810,GO:0006857,GO:0008144,GO:0008150,GO:0015399,GO:0015405,GO:0015833,GO:0015893,GO:0016020,GO:0016462,GO:0016787,GO:0016817,GO:0016818,GO:0016887,GO:0017076,GO:0017111,GO:0022804,GO:0022857,GO:0030554,GO:0032553,GO:0032555,GO:0032559,GO:0035639,GO:0035672,GO:0036094,GO:0042221,GO:0042493,GO:…	ko:K02031,ko:K02032,ko:K10823,ko:K13896,ko:K15583
SMb21483		21.41	18.23	22.61	117.72	128.51	106.05	20.75	117.427	2.5006	4.26e-30	5.63e-29	T	Protein of unknown function (DUF1236)	-	-
SMc00190		792.42	620.88	599.44	3080.93	2674.83	2653.85	670.913	2803.2	2.0629	6.24e-30	8.21e-29	D	Apolipoprotein A1/A4/E domain	-	-
SMb20368		74.87	65.63	66.5	283.85	267.62	303.1	69	284.857	2.0456	1.18e-29	1.54e-28	M	HlyD membrane-fusion protein of T1SS	-	-
SMc01754	cumA	19.85	20.18	18.33	108.04	108.25	97.9	19.4533	104.73	2.4286	1.3e-29	1.7e-28	Q	Multicopper oxidase	-	-
SMa1505		38.93	41.8	36.39	188.2	169.97	171.95	39.04	176.707	2.1783	2.05e-29	2.68e-28	K	PFAM regulatory protein GntR HTH	-	-
SMa6099		97.19	114.46	141.16	56.15	46.52	59.62	117.603	54.0967	-1.1203	2.36e-29	3.07e-28	D	Antitoxin component of a toxin-antitoxin (TA) module	-	-
SMb20831	kpsE	73.44	62.37	64.89	277.66	284.66	264.82	66.9	275.713	2.0431	2.39e-29	3.1e-28	M	COG3524 Capsule polysaccharide export protein	-	ko:K10107
SMc01420		60.6	68.76	56.33	30.21	27.64	24.47	61.8967	27.44	-1.1736	2.54e-29	3.28e-28	K	transmembrane transcriptional regulator (Anti-sigma factor)	-	-
SMc00817	dlhH	39.06	44.93	37.6	170.39	199.91	192.03	40.53	187.443	2.2094	3.81e-29	4.9e-28	Q	dienelactone hydrolase	-	ko:K01061
SMb21481		24.65	18.62	22.35	127.02	121.14	110.45	21.8733	119.537	2.4502	4.08e-29	5.24e-28	S	Domain in cystathionine beta-synthase and other proteins.	-	-
SMc01488		53.33	52.22	57.13	228.86	222.02	260.43	54.2267	237.103	2.1284	5.1e-29	6.51e-28	S	Protein of unknown function (DUF983)	-	-
SMc01842	arsR	106.01	142.33	106.64	493.74	558.27	528.39	118.327	526.8	2.1545	8.74e-29	1.11e-27	KQ	arsR family	-	-
SMc02363	ccmF	77.85	70.58	69.85	316.77	300.79	271.72	72.76	296.427	2.0265	9.09e-29	1.15e-27	O	Cytochrome c-type biogenesis protein	-	ko:K02198
SMb21181	gcdH	45.29	48.96	40.68	216.08	181.49	210.85	44.9767	202.807	2.1729	1.61e-28	2.02e-27	I	acyl-CoA dehydrogenase	-	ko:K00252
SMa0134		8.3	8.46	10.44	71.64	73.24	56.48	9.06667	67.12	2.8881	2.33e-28	2.91e-27	S	Cation transport regulator	-	-
SMc02516	MA20_44780	22.45	20.44	16.99	97.97	111.47	134.92	19.96	114.787	2.5238	4.46e-28	5.56e-27	P	ABC-type sugar transport system, permease component	-	ko:K17323
SMc01605		28.81	32.03	27.43	133.6	151.08	134.92	29.4233	139.867	2.249	6.45e-28	8.01e-27	P	ABC-type Fe3 transport system, periplasmic component	-	ko:K02055
SMc03744	MA20_05375	196.71	228.27	202.85	725.7	796.88	819.56	209.277	780.713	1.8994	6.56e-28	8.13e-27	S	protein conserved in bacteria	-	ko:K09806
SMc00019	MA20_18155	48.4	53	38.13	257.52	194.38	247.88	46.51	233.26	2.3263	9.09e-28	1.12e-26	K	Belongs to the UPF0301 (AlgH) family	-	ko:K07735
SMa0218		39.58	46.1	39.07	13.55	11.98	17.57	41.5833	14.3667	-1.5333	1.26e-27	1.56e-26	G	Periplasmic binding protein domain	-	ko:K02058
SMc02602		43.08	53.52	50.18	19.75	17.04	20.08	48.9267	18.9567	-1.3679	1.53e-27	1.88e-26	#N/A	#N/A	#N/A	#N/A
SMa0217		30.36	32.81	34.79	7.36	7.83	10.04	32.6533	8.41	-1.9571	8.89e-27	1.08e-25	G	Branched-chain amino acid transport system / permease component	-	ko:K02057
SMb20430	ehuD	14.79	14.19	14.99	79.39	93.51	78.44	14.6567	83.78	2.515	1.11e-26	1.34e-25	E	ABC transporter permease	-	ko:K02029
SMb21516		12.98	12.24	10.04	66.99	79.23	72.79	11.7533	73.0033	2.6349	1.18e-26	1.42e-25	S	L,D-transpeptidase catalytic domain	-	-
SMc01169	ald	601.68	635.59	598.37	1930.42	1979.29	2063.97	611.88	1991.23	1.7023	1.93e-26	2.3e-25	E	Belongs to the AlaDH PNT family	-	ko:K00259
SMc00604	ropB	162.59	126.44	126.58	515.81	548.6	599.3	138.537	554.57	2.0011	2.45e-26	2.91e-25	M	OmpA-like transmembrane domain	GO:0005575,GO:0005623,GO:0009279,GO:0016020,GO:0019867,GO:0030312,GO:0030313,GO:0031975,GO:0044462,GO:0044464,GO:0071944	ko:K16079
SMa0792		5.45	4.69	4.42	36.79	53.43	47.07	4.85333	45.7633	3.2371	4.31e-26	5.07e-25	I	Alpha/beta hydrolase family	-	-
SMa1761		24.52	25	23.01	108.04	115.62	121.74	24.1767	115.133	2.2516	4.44e-26	5.23e-25	E	Belongs to the class-III pyridoxal-phosphate-dependent aminotransferase family	-	-
SMc03249		43.6	50.79	47.1	18.2	23.49	14.43	47.1633	18.7067	-1.3341	4.83e-26	5.66e-25	L	Transposase	-	ko:K07483
SMc02854		22.71	23.83	25.82	108.04	132.2	121.11	24.12	120.45	2.3201	5.02e-26	5.87e-25	-	-	-	-
SMc01946	livK	210.47	169.15	179.03	650.96	703.37	752.42	186.217	702.25	1.915	5.43e-26	6.32e-25	E	ABC-type branched-chain amino acid transport systems, periplasmic component	-	ko:K01999
SMc01342		91.48	88.81	80.82	327.22	322.44	308.75	87.0367	319.47	1.876	6.93e-26	8.04e-25	O	DSBA-like thioredoxin domain	-	-
SMc01768	mucS	43.08	53.26	43.35	19.75	15.66	20.71	46.5633	18.7067	-1.3156	7.12e-26	8.25e-25	K	Transcriptional	-	-
SMa2109		39.45	45.97	51.25	16.65	17.04	18.83	45.5567	17.5067	-1.3798	1.38e-25	1.6e-24	GM	NmrA-like family	-	-
SMc00057	mrpG	43.86	50.13	53.25	22.85	15.66	21.96	49.08	20.1567	-1.2839	2.1e-25	2.41e-24	P	Na+/H+ antiporter subunit	-	ko:K05571
SMc02264		88.1	83.99	79.61	315.99	344.08	291.18	83.9	317.083	1.9181	2.18e-25	2.51e-24	-	-	-	-
SMb20989		58	69.28	75.2	30.98	31.78	37.02	67.4933	33.26	-1.021	2.67e-25	3.06e-24	O	SPFH domain / Band 7 family	-	-
SMc00722		384.6	449.77	443.69	1641.15	1483.66	1524.92	426.02	1549.91	1.8632	3.39e-25	3.86e-24	E	Domain of unknown function (DUF4175)	-	-
SMc03019	fliG	43.6	52.09	47.9	20.52	19.81	23.22	47.8633	21.1833	-1.176	3.95e-25	4.5e-24	N	flagellar motor switch protein	GO:0006935,GO:0008150,GO:0009605,GO:0040011,GO:0042221,GO:0042330,GO:0044403,GO:0044419,GO:0050896,GO:0051701,GO:0051704,GO:0052116,GO:0052126,GO:0052127,GO:0052143,GO:0052192,GO:0052195,GO:0052216,GO:0052243	ko:K02410
SMc00862	ispE	30.62	29.43	31.58	141.73	128.05	138.06	30.5433	135.947	2.1541	4.34e-25	4.93e-24	I	Catalyzes the phosphorylation of the position 2 hydroxy group of 4-diphosphocytidyl-2C-methyl-D-erythritol	GO:0003674,GO:0003824,GO:0006793,GO:0006796,GO:0008150,GO:0008152,GO:0009987,GO:0016301,GO:0016310,GO:0016740,GO:0016772,GO:0016773,GO:0044237,GO:0050515	ko:K00919
SMb20771		16.48	14.06	14.05	82.48	73.24	94.13	14.8633	83.2833	2.4863	6.92e-25	7.83e-24	S	Tripartite tricarboxylate transporter family receptor	-	-
SMc01160		15.18	13.02	14.32	68.16	106.4	90.37	14.1733	88.31	2.6394	7.71e-25	8.69e-24	K	transcriptional regulator	-	-
SMc03099		74.22	98.05	98.61	398.48	366.19	409.15	90.2933	391.273	2.1155	1.01e-24	1.13e-23	T	Adenylate cyclase	-	ko:K01768
SMb20945	exoF	26.47	26.69	26.23	112.69	119.3	130.53	26.4633	120.84	2.191	1.1e-24	1.23e-23	M	Polysaccharide biosynthesis/export protein	-	ko:K16552
SMb20004	gstR	38.54	37.63	46.56	14.33	17.04	13.81	40.91	15.06	-1.4417	1.22e-24	1.37e-23	K	transcriptional regulator	-	-
SMa2337		19.07	24.74	17.93	104.94	99.03	124.88	20.58	109.617	2.4132	1.26e-24	1.41e-23	EGP	Acetyl-coenzyme A transporter 1	-	ko:K08218
SMc04882	gcvA	29.2	26.69	27.3	119.66	125.29	124.25	27.73	123.067	2.1499	1.63e-24	1.82e-23	K	Transcriptional regulator	-	ko:K03566
SMc03091	rocF	33.22	42.97	38.4	153.74	187.01	195.79	38.1967	178.847	2.2272	1.71e-24	1.91e-23	E	Belongs to the arginase family	-	ko:K01476
SMc02784	smrA	31.92	33.34	33.72	131.28	159.38	147.47	32.9933	146.043	2.1462	1.91e-24	2.13e-23	S	protein conserved in bacteria	-	-
SMb20144		7.92	6.38	6.56	47.63	54.35	48.95	6.95333	50.31	2.8551	2.5e-24	2.76e-23	E	ABC-type dipeptide transport system, periplasmic component	-	ko:K02035
SMa0376		1.56	2.08	2.41	30.59	29.48	27.61	2.01667	29.2267	3.8572	2.87e-24	3.16e-23	Q	Isochorismatase family	-	-
SMa1625		8.43	5.73	5.75	42.6	54.81	64.64	6.63667	54.0167	3.0249	3.22e-24	3.53e-23	K	LysR substrate binding domain	-	-
SMb20232		45.54	46.62	55.13	19.75	16.58	26.98	49.0967	21.1033	-1.2182	3.35e-24	3.67e-23	G	Binding-protein-dependent transport system inner membrane component	-	ko:K02025
SMb21165	hutH	18.17	19.53	19.67	95.65	95.35	90.99	19.1233	93.9967	2.2973	3.6e-24	3.93e-23	E	histidine	-	ko:K01745
SMc04259		9.47	11.07	12.71	60.41	70.94	87.23	11.0833	72.86	2.7167	4.17e-24	4.55e-23	G	ABC-type sugar transport system, periplasmic component	-	ko:K17315
SMc01159		22.19	28.52	31.04	128.57	149.7	133.04	27.25	137.103	2.3309	4.48e-24	4.87e-23	O	Thioredoxin reductase	-	-
SMb20760	phnH	2.85	2.73	3.08	31.75	31.78	34.51	2.88667	32.68	3.5009	4.84e-24	5.25e-23	P	Carbon-phosphorus lyase	GO:0003674,GO:0005488,GO:0005515,GO:0005575,GO:0006793,GO:0008150,GO:0008152,GO:0009056,GO:0009987,GO:0019634,GO:0019637,GO:0019700,GO:0032991,GO:0042802,GO:0044237,GO:0046434,GO:0061694,GO:0061695,GO:0071704,GO:1901575,GO:1902494,GO:1904176,GO:1990234	ko:K06165
SMc02037		38.54	35.94	39.47	12.78	15.2	16.94	37.9833	14.9733	-1.343	4.84e-24	5.25e-23	IQ	KR domain	-	ko:K00059,ko:K18337
SMc02515		4.02	4.56	5.89	37.95	46.06	43.93	4.82333	42.6467	3.1443	4.93e-24	5.34e-23	S	Small integral membrane protein	-	-
SMc04010		270.41	237.78	232.28	815.15	876.56	801.37	246.823	831.027	1.7514	6.72e-24	7.23e-23	NU	protein conserved in bacteria	-	-
SMc03925	pgm	91.74	65.11	65.3	333.03	327.04	296.83	74.05	318.967	2.1068	6.77e-24	7.28e-23	G	Phosphoglucomutase	GO:0000271,GO:0003674,GO:0003824,GO:0004614,GO:0005575,GO:0005576,GO:0005622,GO:0005623,GO:0005737,GO:0005829,GO:0005975,GO:0005976,GO:0005977,GO:0005978,GO:0005982,GO:0005996,GO:0006006,GO:0006012,GO:0006073,GO:0006091,GO:0006112,GO:0006950,GO:0008150,GO:0008152,GO:0009056,GO:0009058,GO:0009059,GO:0009250,GO:0009266,GO:0009409,GO:0009507,GO:0009526,GO:0009532,GO:0009536,GO:0009570,GO:0009581,GO:…	ko:K01835
SMa0082		6.88	7.03	5.75	47.63	45.6	50.2	6.55333	47.81	2.867	7.52e-24	8.06e-23	ET	Bacterial periplasmic substrate-binding proteins	-	ko:K02030
SMa0064		9.73	7.42	7.09	48.79	66.79	55.22	8.08	56.9333	2.8168	1.05e-23	1.12e-22	M	mandelate racemase muconate lactonizing	-	-
SMb20588	catJ	9.6	6.64	7.09	63.12	50.67	51.46	7.77667	55.0833	2.8244	1.16e-23	1.23e-22	I	Coenzyme A transferase	-	ko:K01040
SMc02645	cfa	191	252.49	207.26	810.51	797.34	872.9	216.917	826.917	1.9306	1.41e-23	1.5e-22	M	cyclopropane-fatty-acyl-phospholipid synthase	GO:0003674,GO:0003824,GO:0005575,GO:0005622,GO:0005623,GO:0005737,GO:0005829,GO:0006629,GO:0008150,GO:0008152,GO:0008168,GO:0008757,GO:0008825,GO:0009987,GO:0016740,GO:0016741,GO:0030258,GO:0032259,GO:0044237,GO:0044238,GO:0044255,GO:0044424,GO:0044444,GO:0044464,GO:0071704	ko:K00574
SMb21206	ybhF	27.51	34.64	27.83	159.16	139.57	124.88	29.9933	141.203	2.2351	1.43e-23	1.52e-22	V	ABC transporter, ATP-binding protein	GO:0003674,GO:0005215,GO:0005575,GO:0005623,GO:0005886,GO:0006810,GO:0006855,GO:0008150,GO:0015562,GO:0015893,GO:0016020,GO:0022857,GO:0042221,GO:0042493,GO:0044464,GO:0050896,GO:0051179,GO:0051234,GO:0055085,GO:0071944	ko:K01990
SMc03959	ligD	91.22	97.27	90.59	325.29	322.44	331.97	93.0267	326.567	1.8117	1.45e-23	1.54e-22	L	DNA ligase	-	ko:K01971
SMc02072		176.21	151.44	129.12	564.61	552.75	562.9	152.257	560.087	1.8791	1.7e-23	1.79e-22	S	Sporulation related domain	-	-
SMc02252	galE	33.09	34.38	29.84	9.68	10.13	13.81	32.4367	11.2067	-1.5333	1.78e-23	1.87e-22	M	Belongs to the NAD(P)-dependent epimerase dehydratase family	-	ko:K01784,ko:K12448
SMc03824		32.44	36.33	30.91	148.32	153.85	129.27	33.2267	143.813	2.1138	1.81e-23	1.9e-22	K	helix_turn_helix multiple antibiotic resistance protein	-	-
SMc06389		49.31	52.48	57.4	28.27	23.95	26.98	53.0633	26.4	-1.0072	1.89e-23	1.97e-22	#N/A	#N/A	#N/A	#N/A
SMa0045	acaP	9.21	6.38	6.02	53.83	47.44	54.6	7.20333	51.9567	2.8506	2.24e-23	2.34e-22	P	Eukaryotic-type carbonic anhydrase	-	ko:K01674
SMc03280		9.73	11.2	10.57	60.8	59.88	66.52	10.5	62.4	2.5712	2.98e-23	3.1e-22	S	PFAM transposase IS66	-	ko:K07484
SMa1179	nosR	85.77	86.99	90.05	354.72	292.49	354.56	87.6033	333.923	1.9305	3.34e-23	3.47e-22	CK	FMN_bind	-	ko:K19339
SMc03054	flhA	39.97	41.67	45.76	20.91	17.96	15.06	42.4667	17.9767	-1.2402	3.8e-23	3.93e-22	N	Required for formation of the rod structure of the flagellar apparatus. Together with FliI and FliH, may constitute the export apparatus of flagellin	-	ko:K02400
SMb20754	pccR	23.49	26.43	26.49	142.89	108.25	116.72	25.47	122.62	2.2673	6e-23	6.16e-22	K	transcriptional	-	ko:K21686
SMb20454	MA20_15015	27.38	27.48	27.3	154.51	130.82	107.31	27.3867	130.88	2.2567	6.16e-23	6.31e-22	T	Protein of unknown function (DUF1236)	-	-
SMc00186	abcT3	166.35	145.45	163.11	527.04	695.08	604.95	158.303	609.023	1.9438	6.56e-23	6.71e-22	V	ABC transporter	GO:0003674,GO:0003824,GO:0005215,GO:0005319,GO:0006810,GO:0006869,GO:0008150,GO:0010876,GO:0015399,GO:0015405,GO:0016462,GO:0016787,GO:0016817,GO:0016818,GO:0016887,GO:0017111,GO:0022804,GO:0022857,GO:0033036,GO:0034040,GO:0042623,GO:0042626,GO:0043492,GO:0051179,GO:0051234,GO:0055085,GO:0071702	ko:K06147,ko:K18893
SMc02558	ygfZ	137.67	131	119.22	453.08	417.32	450.57	129.297	440.323	1.7679	7.33e-23	7.49e-22	S	Belongs to the GcvT family	-	ko:K06980
SMc03137		8.69	10.94	9.63	54.6	64.95	60.87	9.75333	60.14	2.6244	7.38e-23	7.52e-22	S	PIN domain	-	-
SMc02518	MA20_44790	17	17.97	14.32	80.16	83.83	84.09	16.43	82.6933	2.3314	8.63e-23	8.77e-22	G	Belongs to the ABC transporter superfamily	-	ko:K17325
SMc03879	phbA	125.99	113.03	110.79	432.17	406.73	382.17	116.603	407.023	1.8035	1e-22	1.02e-21	I	Belongs to the thiolase family	GO:0005575,GO:0005622,GO:0005623,GO:0005737,GO:0044424,GO:0044464	ko:K00626
SMc00878		55.15	52.48	48.04	204.47	184.25	208.34	51.89	199.02	1.9394	1.1e-22	1.11e-21	K	Autoinducer binding domain	-	-
SMb20896	gbpR	14.66	13.15	16.19	77.06	80.61	74.05	14.6667	77.24	2.3968	1.55e-22	1.55e-21	K	Transcriptional regulator	-	ko:K02623
SMb20757	bhbA	17.13	17.32	17.39	93.33	91.66	74.68	17.28	86.5567	2.3245	1.55e-22	1.55e-21	I	Methylmalonyl-CoA mutase	-	ko:K01847
SMa0799		22.32	13.02	16.46	91	116.54	93.5	17.2667	100.347	2.5389	1.62e-22	1.62e-21	E	Bacterial extracellular solute-binding protein	-	ko:K02055
SMc01788		23.49	27.22	31.31	6.97	6.45	6.9	27.34	6.77333	-2.0131	1.98e-22	1.97e-21	-	-	-	-
SMa0104		19.33	16.67	14.72	84.42	81.07	87.23	16.9067	84.24	2.3169	2.5e-22	2.47e-21	E	Bacterial extracellular solute-binding proteins, family 5 Middle	-	ko:K02035
SMb20761	phnI	2.72	4.82	5.49	38.72	43.3	37.65	4.34333	39.89	3.1992	3.17e-22	3.12e-21	P	Phosphonate	GO:0003674,GO:0003824,GO:0005575,GO:0006793,GO:0008150,GO:0008152,GO:0009056,GO:0009987,GO:0016740,GO:0016772,GO:0016780,GO:0019634,GO:0019637,GO:0019700,GO:0032991,GO:0044237,GO:0046434,GO:0061693,GO:0061694,GO:0061695,GO:0071704,GO:1901575,GO:1902494,GO:1904176,GO:1990234	ko:K06164
SMb21008	MA20_01010	25.04	36.85	36.93	6.2	8.75	13.18	32.94	9.37667	-1.8127	3.39e-22	3.33e-21	K	Transcriptional regulator	-	-
SMc03115		41.78	54.69	45.76	18.2	25.79	21.34	47.41	21.7767	-1.1224	3.81e-22	3.74e-21	L	Transposase	-	ko:K07493
SMc01658	fhuF	9.86	8.33	7.76	51.12	57.12	53.34	8.65	53.86	2.6384	4.68e-22	4.59e-21	S	ferric iron reductase	-	ko:K13255
SMc02322	rhaD	24.39	26.56	20.87	98.36	117.46	114.84	23.94	110.22	2.2029	4.7e-22	4.59e-21	IQ	Short chain dehydrogenase	-	-
SMc01757		161.29	169.67	156.15	505.36	539.85	544.07	162.37	529.76	1.7061	5.04e-22	4.93e-21	P	Rhodanese Homology Domain	-	-
SMb20505		36.98	42.06	45.09	16.26	22.11	11.92	41.3767	16.7633	-1.3035	5.29e-22	5.16e-21	S	Phosphotransferase enzyme family	-	-
SMc02873		143.9	148.06	144.51	517.36	479.05	641.97	145.49	546.127	1.9083	5.46e-22	5.32e-21	G	Sugar ABC transporter, substrate-binding protein	-	ko:K10117
SMb21346		11.42	12.63	11.24	65.83	59.42	70.28	11.7633	65.1767	2.4701	6.6e-22	6.39e-21	K	Periplasmic binding protein-like domain	-	ko:K02529
SMb20953		30.88	36.46	34.12	12.78	7.83	16.94	33.82	12.5167	-1.434	1.3e-21	1.26e-20	#N/A	#N/A	#N/A	#N/A
SMa0793	ntaB	8.69	5.47	8.16	50.73	59.42	45.81	7.44	51.9867	2.8048	1.31e-21	1.26e-20	K	Conserved protein domain typically associated with flavoprotein oxygenases, DIM6 NTAB family	-	-
SMc03234	lapB	61.12	50.13	48.7	200.59	211.43	200.18	53.3167	204.067	1.9364	1.61e-21	1.54e-20	S	HemY protein N-terminus	-	ko:K02498
SMb23123		40.61	46.23	45.09	20.91	24.87	16.32	43.9767	20.7	-1.0871	1.83e-21	1.75e-20	-	-	-	-
SMc02769	MA20_04040	308.56	329.58	321	965.79	1087.07	1191.07	319.713	1081.31	1.7579	1.86e-21	1.77e-20	S	Protein of unknown function (DUF2852)	-	-
SMc00023	MA20_42440	181.01	160.69	147.99	602.94	586.83	512.7	163.23	567.49	1.7977	2.36e-21	2.24e-20	O	COG1651 Protein-disulfide isomerase	-	-
SMa0146		19.59	24.87	23.95	3.1	4.61	5.02	22.8033	4.24333	-2.426	2.36e-21	2.24e-20	#N/A	#N/A	#N/A	#N/A
SMc04133	MA20_16885	26.99	30.86	29.04	8.91	9.67	11.3	28.9633	9.96	-1.54	2.41e-21	2.29e-20	S	oxidoreductase	-	-
SMa0461		20.76	25.78	22.48	5.42	3.22	5.02	23.0067	4.55333	-2.3371	2.47e-21	2.34e-20	L	Transposase	-	ko:K07493
SMa2223		9.86	10.68	8.96	61.18	52.05	58.36	9.83333	57.1967	2.5402	3.04e-21	2.88e-20	E	FAD dependent oxidoreductase	-	-
SMa1672		26.47	30.86	29.3	8.52	5.07	13.81	28.8767	9.13333	-1.6607	3.31e-21	3.12e-20	S	Protein of unknown function (DUF1269)	-	-
SMc00032		9.86	12.24	9.1	58.09	55.27	70.91	10.4	61.4233	2.5622	4.63e-21	4.35e-20	S	Short repeat of unknown function (DUF308)	-	-
SMc02144	pstC	28.55	27.61	22.08	122.76	101.34	133.04	26.08	119.047	2.1905	4.97e-21	4.66e-20	P	probably responsible for the translocation of the substrate across the membrane	-	ko:K02037
SMb20465	MA20_44035	34	42.58	47.5	18.2	15.2	18.83	41.36	17.41	-1.2483	5.23e-21	4.89e-20	GK	carbohydrate kinase activity	-	-
SMc02169	frcA	34.13	29.17	29.44	146.38	124.37	121.74	30.9133	130.83	2.0814	5.36e-21	5e-20	G	ABC transporter	-	ko:K10554
SMa0794		12.59	7.42	8.83	59.64	66.33	55.22	9.61333	60.3967	2.6514	5.37e-21	5e-20	C	Luciferase-like monooxygenase	-	-
SMc02084	exbD	19.2	16.8	16.86	79	87.52	82.83	17.62	83.1167	2.2379	6.25e-21	5.8e-20	U	Biopolymer transport protein	-	ko:K03559,ko:K03560
SMb20172	cy2	1.43	1.43	1.87	18.59	24.87	33.89	1.57667	25.7833	4.0315	1.08e-20	9.98e-20	C	Cytochrome c	-	ko:K08738
SMc04169		47.1	33.6	32.92	165.74	168.13	155	37.8733	162.957	2.1052	1.08e-20	1e-19	K	Transcriptional regulator containing an amidase domain and an AraC-type DNA-binding HTH domain	-	ko:K21826
SMa1182	nosZ	115.74	142.72	111.06	539.82	406.73	573.57	123.173	506.707	2.0405	1.41e-20	1.3e-19	C	Nitrous-oxide reductase is part of a bacterial respiratory system which is activated under anaerobic conditions in the presence of nitrate or nitrous oxide	-	ko:K00376
SMb20249		4.41	5.08	5.49	39.5	41	33.89	4.99333	38.13	2.9329	1.69e-20	1.54e-19	I	Myo-inositol-1-phosphate synthase	-	ko:K01858
SMc02785	mltA	212.54	226.97	207.13	695.49	713.5	646.36	215.547	685.117	1.6683	1.83e-20	1.67e-19	M	membrane-bound lytic murein transglycosylase	-	ko:K08304
SMc00518	MA20_09415	11.68	12.24	12.04	63.51	57.12	73.42	11.9867	64.6833	2.432	1.85e-20	1.68e-19	O	XdhC CoxF family	-	ko:K07402
SMc02265	secD	438.58	372.42	360.2	1228.35	1210.97	1302.14	390.4	1247.15	1.6756	1.88e-20	1.71e-19	U	Part of the Sec protein translocase complex. Interacts with the SecYEG preprotein conducting channel. SecDF uses the proton motive force (PMF) to complete protein translocation after the ATP-dependent function of SecA	-	ko:K03072,ko:K12257
SMc01457	acrD	179.71	174.62	184.78	551.05	599.73	581.73	179.703	577.503	1.6842	2.28e-20	2.07e-19	V	Belongs to the resistance-nodulation-cell division (RND) (TC 2.A.6) family	-	ko:K03296,ko:K18138
SMc04199		36.33	30.99	35.99	10.07	16.58	16.32	34.4367	14.3233	-1.2656	2.3e-20	2.08e-19	#N/A	#N/A	#N/A	#N/A
SMb20759	phnG	1.3	2.73	4.15	27.49	36.85	32.63	2.72667	32.3233	3.5674	2.4e-20	2.17e-19	P	Phosphonate metabolism	GO:0005575,GO:0006793,GO:0008150,GO:0008152,GO:0009056,GO:0009987,GO:0019634,GO:0019637,GO:0019700,GO:0032991,GO:0044237,GO:0046434,GO:0061694,GO:0061695,GO:0071704,GO:1901575,GO:1902494,GO:1904176,GO:1990234	ko:K06166
SMa0796	dhaS	16.87	8.59	11.51	72.42	80.61	71.54	12.3233	74.8567	2.6027	2.48e-20	2.24e-19	C	belongs to the aldehyde dehydrogenase family	-	ko:K00128
SMc01624		8.3	9.12	8.16	43.76	55.27	58.99	8.52667	52.6733	2.627	2.54e-20	2.3e-19	G	Belongs to the ABC transporter superfamily	-	ko:K10112
SMb20369		39.84	41.54	36.26	157.61	143.25	149.98	39.2133	150.28	1.9382	2.97e-20	2.67e-19	M	MacB-like periplasmic core domain	-	ko:K09808
SMc03799		64.75	76.31	73.99	255.58	287.89	251.64	71.6833	265.037	1.8865	3.02e-20	2.71e-19	S	Cobalamin synthesis protein cobW C-terminal domain	-	-
SMb21577		8.17	8.07	7.23	65.44	42.84	47.07	7.82333	51.7833	2.7266	3.31e-20	2.97e-19	#N/A	#N/A	#N/A	#N/A
SMb20937	exsE	26.08	22.27	24.35	98.75	105.48	107.31	24.2333	103.847	2.0994	3.56e-20	3.19e-19	S	ABC transporter	-	ko:K02471
SMc02650	arsH	42.3	60.94	48.97	23.23	28.56	23.22	50.7367	25.0033	-1.0209	3.98e-20	3.55e-19	S	Arsenical resistance protein	GO:0000166,GO:0003674,GO:0003824,GO:0005488,GO:0008150,GO:0008152,GO:0009987,GO:0010035,GO:0010038,GO:0010181,GO:0016043,GO:0016491,GO:0016645,GO:0016646,GO:0022607,GO:0032553,GO:0036094,GO:0042221,GO:0043167,GO:0043168,GO:0043933,GO:0044085,GO:0048037,GO:0050662,GO:0050896,GO:0051259,GO:0051260,GO:0051262,GO:0051289,GO:0052873,GO:0055114,GO:0065003,GO:0071840,GO:0097159,GO:0097367,GO:1901265,GO:…	ko:K11811
SMc02893		30.23	28.65	25.02	105.72	122.99	122.37	27.9667	117.027	2.0651	4.06e-20	3.61e-19	K	transcriptional regulator	-	-
SMb21587	ytfQ	1.43	2.34	2.81	20.52	31.78	32.63	2.19333	28.31	3.6901	4.3e-20	3.82e-19	G	ABC transporter	GO:0003674,GO:0005215,GO:0005488,GO:0005534,GO:0005575,GO:0005623,GO:0005886,GO:0006810,GO:0008150,GO:0008643,GO:0008645,GO:0015144,GO:0015145,GO:0015749,GO:0015757,GO:0016020,GO:0016021,GO:0022857,GO:0030246,GO:0030288,GO:0030313,GO:0031224,GO:0031975,GO:0034219,GO:0036094,GO:0042597,GO:0044425,GO:0044464,GO:0048029,GO:0051119,GO:0051179,GO:0051234,GO:0055085,GO:0071702,GO:0071944	ko:K02058,ko:K10439,ko:K17213
SMc03233		88.75	89.72	76.4	283.08	280.98	318.16	84.9567	294.073	1.7914	5.22e-20	4.6e-19	DZ	transferase activity, transferring acyl groups other than amino-acyl groups	-	-
SMc03809	lolA	48.4	45.32	47.37	160.32	218.8	187.63	47.03	188.917	2.0061	5.63e-20	4.96e-19	M	Participates in the translocation of lipoproteins from the inner membrane to the outer membrane. Only forms a complex with a lipoprotein if the residue after the N-terminal Cys is not an aspartate (The Asp acts as a targeting signal to indicate that the lipoprotein should stay in the inner membrane)	-	-
SMc02512		20.37	22.4	24.62	104.56	89.82	115.47	22.4633	103.283	2.201	7.16e-20	6.29e-19	F	Permease family	-	ko:K03458
SMc00609	MA20_38000	112.11	97.27	94.2	349.68	333.03	335.73	101.193	339.48	1.7462	7.33e-20	6.43e-19	C	Belongs to the prokaryotic molybdopterin-containing oxidoreductase family	-	-
SMa6086		29.97	31.12	34.25	10.84	8.75	18.2	31.78	12.5967	-1.3351	9.14e-20	8.01e-19	#N/A	#N/A	#N/A	#N/A
SMb20388		35.81	64.2	48.7	20.91	23.03	15.69	49.57	19.8767	-1.3184	9.38e-20	8.21e-19	C	Zinc-binding dehydrogenase	-	ko:K00344
SMa1586		23.62	24.48	21.41	87.52	118.84	106.05	23.17	104.137	2.1681	1.38e-19	1.21e-18	L	Transposase	-	ko:K07497
SMa1750		20.89	16.67	13.38	91.78	85.68	75.3	16.98	84.2533	2.3109	1.89e-19	1.64e-18	-	-	-	-
SMb20203	cbbR	17.78	17.32	17.66	71.25	90.28	85.35	17.5867	82.2933	2.2263	2.1e-19	1.82e-18	K	LysR substrate binding domain	-	ko:K21703
SMc02828	MA20_04115	21.8	16.41	16.19	82.87	82.45	89.11	18.1333	84.81	2.2256	2.28e-19	1.98e-18	EH	2-hydroxyacid dehydrogenase	-	ko:K12972
SMc04216		27.12	32.29	28.23	10.84	11.98	11.92	29.2133	11.58	-1.335	2.34e-19	2.03e-18	S	Protein of unknown function (DUF1289)	-	ko:K06938
SMc02726	hmuR	123.79	113.16	95	359.75	376.79	416.06	110.65	384.2	1.7959	2.43e-19	2.1e-18	P	Outer membrane receptor proteins, mostly Fe transport	-	ko:K02014,ko:K16087,ko:K16092
SMc02832	MA20_18500	71.24	78.78	68.64	255.2	245.05	246.62	72.8867	248.957	1.7722	2.9e-19	2.5e-18	E	ABC-type oligopeptide transport system, periplasmic component	-	ko:K02035,ko:K13893
SMb21000		17.52	21.75	16.06	98.36	76	90.99	18.4433	88.45	2.2618	3.64e-19	3.14e-18	EGP	Permeases of the major facilitator superfamily	-	-
SMa0063		5.45	4.82	4.15	33.69	39.61	33.89	4.80667	35.73	2.894	3.97e-19	3.42e-18	K	FCD	-	-
SMc01458		117.3	130.09	121.23	384.92	444.96	397.23	122.873	409.037	1.7351	4.06e-19	3.49e-18	M	Belongs to the membrane fusion protein (MFP) (TC 8.A.1) family	-	-
SMc01761	parC	122.23	103.78	97.54	414.35	342.7	380.29	107.85	379.113	1.8136	4.12e-19	3.54e-18	L	Topoisomerase IV is essential for chromosome segregation. It relaxes supercoiled DNA. Performs the decatenation events required during the replication of a circular DNA molecule	-	ko:K02621
SMb20481	asnO	20.63	16.41	18.06	84.42	89.36	77.19	18.3667	83.6567	2.1874	4.4e-19	3.77e-18	E	Asparagine synthase	-	ko:K01953
SMb20903	xylH	34.39	22.4	20.74	122.76	129.9	116.09	25.8433	122.917	2.2498	4.43e-19	3.79e-18	G	Belongs to the binding-protein-dependent transport system permease family	GO:0003674,GO:0005215,GO:0005575,GO:0005623,GO:0005886,GO:0006810,GO:0008150,GO:0008643,GO:0015144,GO:0015145,GO:0015749,GO:0016020,GO:0016021,GO:0022857,GO:0031224,GO:0034219,GO:0044425,GO:0044464,GO:0051119,GO:0051179,GO:0051234,GO:0055085,GO:0071702,GO:0071944	ko:K10544
SMa2400	ectB	19.98	23.31	19.8	99.91	81.53	131.16	21.03	104.2	2.3088	4.9e-19	4.18e-18	E	diaminobutyrate-pyruvate transaminase activity	-	ko:K00836
SMc03923	glgC	41.78	38.02	38.4	134.37	164.44	154.37	39.4	151.06	1.9389	5.74e-19	4.89e-18	H	Catalyzes the synthesis of ADP-glucose, a sugar donor used in elongation reactions on alpha-glucans	-	ko:K00975
SMa1760		22.19	23.83	25.29	95.26	113.77	97.27	23.77	102.1	2.1028	6.95e-19	5.89e-18	S	Phosphotransferase enzyme family	-	-
SMa5002		8.04	5.47	6.15	53.05	43.3	36.4	6.55333	44.25	2.7554	8.46e-19	7.16e-18	-	-	-	-
SMc00115		19.2	27.74	19.8	97.97	98.57	110.45	22.2467	102.33	2.2016	1.36e-18	1.14e-17	S	Glyoxalase/Bleomycin resistance protein/Dioxygenase superfamily	-	ko:K07104
SMb20423		18.04	15.89	16.59	79	74.62	74.05	16.84	75.89	2.172	1.45e-18	1.21e-17	E	Belongs to the class-III pyridoxal-phosphate-dependent aminotransferase family	-	ko:K15785
SMc03924	glgA	49.05	41.8	41.48	158.38	172.73	155	44.11	162.037	1.8771	1.86e-18	1.55e-17	G	Synthesizes alpha-1,4-glucan chains using ADP-glucose	GO:0000271,GO:0003674,GO:0003824,GO:0005575,GO:0005622,GO:0005623,GO:0005737,GO:0005829,GO:0005975,GO:0005976,GO:0005977,GO:0005978,GO:0006073,GO:0006091,GO:0006112,GO:0008150,GO:0008152,GO:0009058,GO:0009059,GO:0009250,GO:0009987,GO:0015980,GO:0016051,GO:0016740,GO:0016757,GO:0016758,GO:0033692,GO:0034637,GO:0034645,GO:0043170,GO:0044042,GO:0044237,GO:0044238,GO:0044249,GO:0044260,GO:0044262,GO:…	ko:K00703
SMc01161	coaBC	28.68	33.21	28.5	122.76	114.23	118.6	30.13	118.53	1.976	1.91e-18	1.59e-17	H	Catalyzes two steps in the biosynthesis of coenzyme A. In the first step cysteine is conjugated to 4'-phosphopantothenate to form 4-phosphopantothenoylcysteine, in the latter compound is decarboxylated to form 4'-phosphopantotheine	-	ko:K13038,ko:K21977
SMc01493		95.5	81.39	70.65	300.89	278.68	289.29	82.5133	289.62	1.8115	1.97e-18	1.64e-17	K	HxlR-like helix-turn-helix	-	-
SMc02694	clpS	43.47	43.36	45.63	149.48	163.98	193.91	44.1533	169.123	1.9375	2.08e-18	1.73e-17	S	Involved in the modulation of the specificity of the ClpAP-mediated ATP-dependent protein degradation	-	ko:K06891
SMc03133		22.19	22.79	20.47	88.68	89.82	94.13	21.8167	90.8767	2.0585	2.28e-18	1.89e-17	E	Binding-protein-dependent transport system inner membrane component	-	ko:K02029
SMc02066	tatB	61.5	48.44	47.23	207.56	190.24	186.38	52.39	194.727	1.8941	2.53e-18	2.09e-17	U	Part of the twin-arginine translocation (Tat) system that transports large folded proteins containing a characteristic twin-arginine motif in their signal peptide across membranes. Together with TatC, TatB is part of a receptor directly interacting with Tat signal peptides. TatB may form an oligomeric binding site that transiently accommodates folded Tat precursor proteins before their translocat…	GO:0003674,GO:0005215	ko:K03117
SMb20713		31.66	37.76	32.78	133.99	122.99	141.2	34.0667	132.727	1.962	2.76e-18	2.28e-17	G	Part of an ABC transporter complex involved in carbohydrate import. Could be involved in ribose, galactose and or methyl galactoside import. Responsible for energy coupling to the transport system	-	ko:K17215
SMc02737	proX	137.93	129.31	113.47	437.98	385.54	417.31	126.903	413.61	1.7045	2.9e-18	2.39e-17	E	ABC-type proline glycine betaine transport systems, periplasmic components	-	ko:K02002
SMb20239	rmlB	7.53	7.42	6.69	51.12	41	39.53	7.21333	43.8833	2.6049	3.81e-18	3.13e-17	GM	dTDP-glucose 4-6-dehydratase	-	ko:K08678
SMc02378		153.63	151.7	136.75	429.46	495.63	469.4	147.36	464.83	1.6574	4.09e-18	3.36e-17	E	ABC-type proline glycine betaine transport systems, periplasmic components	-	ko:K02002
SMb20568	livJ	18.3	17.32	16.46	66.22	84.29	98.52	17.36	83.01	2.2575	4.61e-18	3.78e-17	E	ABC transporter substrate-binding protein	-	ko:K01999
SMc04352		23.49	20.31	16.32	94.1	92.59	80.95	20.04	89.2133	2.1544	4.67e-18	3.82e-17	S	Bacterial transglutaminase-like cysteine proteinase BTLCP	-	-
SMc02401		12.98	13.93	17.39	76.29	73.7	66.52	14.7667	72.17	2.2891	5.13e-18	4.18e-17	S	BA14K-like protein	-	-
SMb20257		6.62	7.16	7.49	40.27	46.06	42.04	7.09	42.79	2.5934	5.41e-18	4.4e-17	T	Adenylate cyclase	-	ko:K01768
SMa1641		10.9	9.25	8.56	48.79	51.13	54.6	9.57	51.5067	2.4282	6.33e-18	5.13e-17	EGP	Major Facilitator Superfamily	-	-
SMc02603	MA20_42180	90.31	100.14	99.95	360.53	301.71	331.34	96.8	331.193	1.7746	6.46e-18	5.23e-17	EGP	Permeases of the major facilitator superfamily	-	-
SMc01727		24.65	22.4	17.13	91.78	95.81	90.37	21.3933	92.6533	2.1147	6.55e-18	5.3e-17	G	Phosphoenolpyruvate phosphomutase	-	-
SMc01652	ydcS	17.39	25.91	20.87	92.94	163.06	101.66	21.39	119.22	2.4786	7.27e-18	5.87e-17	E	Spermidine putrescine ABC transporter substrate-binding protein	GO:0005575,GO:0005623,GO:0006810,GO:0008150,GO:0008152,GO:0009058,GO:0009290,GO:0009292,GO:0009294,GO:0009987,GO:0015931,GO:0030288,GO:0030313,GO:0031975,GO:0042597,GO:0042618,GO:0042619,GO:0044464,GO:0044764,GO:0050657,GO:0051027,GO:0051179,GO:0051234,GO:0051704,GO:0071702,GO:0071704,GO:0071705,GO:0098657,GO:1901440,GO:1901441,GO:1901576	ko:K02055
SMc02586	hrpB	30.88	26.17	24.22	109.59	105.94	107.94	27.09	107.823	1.9928	8.13e-18	6.55e-17	L	ATP-dependent helicase	-	ko:K03579
SMa2253		22.84	18.36	22.35	88.29	89.36	94.13	21.1833	90.5933	2.0965	8.52e-18	6.86e-17	S	PIN domain	-	-
SMa0988		14.27	22.53	22.08	4.26	3.68	1.88	19.6267	3.27333	-2.584	9.28e-18	7.45e-17	#N/A	#N/A	#N/A	#N/A
SMc03138	frlD	14.27	12.76	13.65	58.86	65.87	69.66	13.56	64.7967	2.2566	9.42e-18	7.56e-17	G	pfkB family carbohydrate kinase	-	ko:K10710
SMb20670		12.85	11.46	10.44	61.57	56.2	55.22	11.5833	57.6633	2.3156	9.86e-18	7.89e-17	S	Putative sugar-binding N-terminal domain	-	ko:K21948
SMc02841	ada	48.4	52.87	48.7	171.16	169.51	183.87	49.99	174.847	1.8064	1e-17	8.03e-17	KL	Methyltransferase	-	ko:K10778
SMc00876	mrp	282.35	307.45	286.61	870.53	855.84	867.88	292.137	864.75	1.5656	1.03e-17	8.23e-17	D	Binds and transfers iron-sulfur (Fe-S) clusters to target apoproteins. Can hydrolyze ATP	-	ko:K03593
SMb22015	yybE	22.06	35.94	30.64	12	10.59	8.79	29.5467	10.46	-1.4981	1.06e-17	8.43e-17	K	DNA-binding transcription factor activity	-	ko:K09681
SMb21595		33.35	35.16	40.41	18.2	20.27	15.69	36.3067	18.0533	-1.008	1.15e-17	9.12e-17	G	ABC-type sugar transport system, periplasmic component	-	ko:K02027
SMc03888	ispG	197.75	208.09	194.42	583.58	589.14	631.93	200.087	601.55	1.5881	1.16e-17	9.25e-17	I	Converts 2C-methyl-D-erythritol 2,4-cyclodiphosphate (ME-2,4cPP) into 1-hydroxy-2-methyl-2-(E)-butenyl 4-diphosphate	GO:0003674,GO:0003824,GO:0006081,GO:0006082,GO:0006090,GO:0006629,GO:0006644,GO:0006720,GO:0006793,GO:0006796,GO:0008150,GO:0008152,GO:0008299,GO:0008610,GO:0008654,GO:0009058,GO:0009240,GO:0009987,GO:0016491,GO:0016725,GO:0019288,GO:0019637,GO:0019682,GO:0019752,GO:0032787,GO:0043436,GO:0044237,GO:0044238,GO:0044249,GO:0044255,GO:0044281,GO:0046429,GO:0046490,GO:0052592,GO:0055114,GO:0071704,GO:…	ko:K03526
SMb20171	fghA	3.11	3.13	3.48	25.56	23.95	43.3	3.24	30.9367	3.2553	1.17e-17	9.31e-17	S	Serine hydrolase involved in the detoxification of formaldehyde	-	ko:K01070
SMb20476		36.98	26.3	28.77	118.11	144.17	122.37	30.6833	128.217	2.0631	1.17e-17	9.32e-17	E	Bacterial extracellular solute-binding proteins, family 5 Middle	-	ko:K02035
SMc00198		10.51	6.51	6.56	50.34	40.53	58.36	7.86	49.7433	2.6619	1.25e-17	9.93e-17	#N/A	#N/A	#N/A	#N/A
SMc04461	tolB	122.49	109.25	106.51	369.82	390.15	334.48	112.75	364.817	1.694	1.48e-17	1.17e-16	U	Involved in the TonB-independent uptake of proteins	-	ko:K03641
SMb20375	MA20_28005	20.89	18.23	21.68	104.17	90.28	76.56	20.2667	90.3367	2.1562	1.54e-17	1.22e-16	K	FCD	-	ko:K05799
SMa0851		132.74	113.81	113.6	374.08	370.8	422.96	120.05	389.28	1.6972	1.57e-17	1.24e-16	S	Sulfotransferase domain	-	-
SMb21005		29.45	36.59	37.33	10.46	20.73	14.43	34.4567	15.2067	-1.1801	1.85e-17	1.45e-16	S	Domain of unknown function (DU1801)	-	-
SMc02517	MA20_44785	18.43	21.75	18.33	80.16	78.77	97.27	19.5033	85.4	2.1305	2.19e-17	1.71e-16	P	ABC-type sugar transport systems, permease components	-	ko:K17322
SMc00048		79.54	84.25	76.8	243.19	279.6	266.7	80.1967	263.163	1.7143	2.59e-17	2.01e-16	T	Universal stress protein family	-	-
SMb20960	galU	26.86	27.48	25.16	104.56	106.4	97.27	26.5	102.743	1.955	2.68e-17	2.08e-16	M	UTP-glucose-1-phosphate uridylyltransferase	-	ko:K00963
SMa1961		27.51	27.22	28.9	103.78	111.93	107.31	27.8767	107.673	1.9495	2.97e-17	2.3e-16	Q	de-polymerase	-	-
SMa0387	hisC1	11.55	11.98	13.92	56.15	61.26	67.15	12.4833	61.52	2.3011	3.22e-17	2.48e-16	E	Belongs to the class-II pyridoxal-phosphate-dependent aminotransferase family. Histidinol-phosphate aminotransferase subfamily	-	ko:K00817
SMa1507		48.92	48.44	44.16	174.26	153.39	167.55	47.1733	165.067	1.807	3.24e-17	2.5e-16	S	ABC transporter substrate-binding protein PnrA-like	-	ko:K02058
SMb21540		21.02	27.48	26.36	8.91	10.13	8.79	24.9533	9.27667	-1.4276	4.27e-17	3.27e-16	P	Bacterial extracellular solute-binding protein	-	ko:K02012
SMa0009	fdhE	15.18	18.23	16.73	69.32	76.92	75.93	16.7133	74.0567	2.1476	4.67e-17	3.58e-16	O	Necessary for formate dehydrogenase activity	-	ko:K02380
SMc03236	guaA2	21.8	20.31	18.73	91	76.92	86.6	20.28	84.84	2.0647	4.72e-17	3.61e-16	F	glutamine amidotransferase	-	ko:K01951
SMa2410		42.04	31.51	33.58	123.53	172.27	146.84	35.71	147.547	2.0468	4.84e-17	3.7e-16	Q	IucA / IucC family	-	ko:K03895
SMb21690	exoW	27.9	26.43	21.14	93.33	107.32	104.8	25.1567	101.817	2.017	5.59e-17	4.27e-16	M	Succinoglycan biosynthesis protein	GO:0005575,GO:0005623,GO:0005886,GO:0016020,GO:0044464,GO:0071944	ko:K16562
SMc00451	mpp	195.02	159.78	139.69	576.22	543.07	533.41	164.83	550.9	1.7408	5.86e-17	4.47e-16	S	Belongs to the peptidase M16 family	-	-
SMc01336	rne	726.64	528.03	484.5	2250.68	2213.75	1868.81	579.723	2111.08	1.8645	6.2e-17	4.71e-16	J	Endoribonuclease that plays a central role in RNA processing and decay. Required for the maturation of 5S and 16S rRNAs and the majority of tRNAs. Also involved in the degradation of most mRNAs	-	ko:K08300
SMb20756	pccA	19.2	16.67	20.34	81.32	94.43	72.79	18.7367	82.8467	2.1446	6.2e-17	4.71e-16	I	propionyl-CoA carboxylase	GO:0003674,GO:0003824,GO:0004658,GO:0005488,GO:0005515,GO:0005575,GO:0005622,GO:0005623,GO:0005737,GO:0005739,GO:0005759,GO:0005829,GO:0006082,GO:0006732,GO:0006766,GO:0006767,GO:0006768,GO:0006790,GO:0006807,GO:0008144,GO:0008150,GO:0008152,GO:0009374,GO:0009987,GO:0016421,GO:0016874,GO:0016885,GO:0017144,GO:0019752,GO:0019842,GO:0019899,GO:0031406,GO:0031974,GO:0032787,GO:0033218,GO:0033293,GO:…	ko:K01965
SMc00559	azlC	30.1	29.3	28.37	12	16.58	13.18	29.2567	13.92	-1.0716	6.74e-17	5.12e-16	E	AzlC protein	-	-
SMc04389	ttuD2	13.75	14.19	12.58	55.76	68.63	65.89	13.5067	63.4267	2.2314	7.26e-17	5.51e-16	G	hydroxypyruvate reductase	-	ko:K11529
SMb20233		29.2	34.51	37.73	12.39	18.42	18.2	33.8133	16.3367	-1.0495	7.71e-17	5.85e-16	P	ABC-type sugar transport system, permease component	-	ko:K02026,ko:K10190
SMc02553	MA20_42060	34.77	36.46	33.99	129.73	127.13	123	35.0733	126.62	1.8521	8.44e-17	6.38e-16	S	Belongs to the SOS response-associated peptidase family	-	-
SMc00063		10.38	8.07	8.16	46.47	48.83	47.07	8.87	47.4567	2.4196	9.12e-17	6.86e-16	-	-	-	-
SMb20359		24.13	23.83	26.23	88.68	100.42	120.49	24.73	103.197	2.0611	9.79e-17	7.34e-16	-	-	-	-
SMc01625		7.4	5.99	7.49	36.01	40.07	53.97	6.96	43.35	2.6389	1.05e-16	7.89e-16	G	ATPases associated with a variety of cellular activities	-	ko:K10112
SMa2221		4.15	4.17	4.68	27.88	28.1	45.18	4.33333	33.72	2.9601	1.15e-16	8.59e-16	E	flavin adenine dinucleotide binding	-	-
SMa0567	acsA1	17.78	19.92	19	5.03	4.15	6.9	18.9	5.36	-1.8181	1.15e-16	8.6e-16	I	Acyl-coenzyme A synthetases AMP-(fatty) acid ligases	-	ko:K01907
SMc01267	prkA	811.37	863.61	871.46	2498.13	2418.73	2419.78	848.813	2445.55	1.5266	1.27e-16	9.45e-16	T	Serine protein kinase	GO:0003674,GO:0003824,GO:0004672,GO:0006464,GO:0006468,GO:0006793,GO:0006796,GO:0006807,GO:0006950,GO:0006995,GO:0007154,GO:0008150,GO:0008152,GO:0009267,GO:0009605,GO:0009987,GO:0009991,GO:0016301,GO:0016310,GO:0016740,GO:0016772,GO:0016773,GO:0019538,GO:0031667,GO:0031668,GO:0031669,GO:0033554,GO:0036211,GO:0042594,GO:0043170,GO:0043412,GO:0043562,GO:0044237,GO:0044238,GO:0044260,GO:0044267,GO:…	ko:K07180
SMc01509		12.98	10.29	10.84	51.12	60.8	56.48	11.37	56.1333	2.3036	1.34e-16	1e-15	S	Bacterial protein of unknown function (DUF883)	-	-
SMc02260	aotP	102.51	94.54	80.55	345.81	287.43	301.85	92.5333	311.697	1.7521	1.66e-16	1.24e-15	E	ABC-type histidine transport system, ATPase component	-	ko:K02028
SMc02578		50.99	50.13	54.19	176.2	177.34	173.83	51.77	175.79	1.7637	1.91e-16	1.42e-15	M	Protein of unknown function (DUF1402)	-	-
SMb21254		32.57	28.13	25.16	104.56	106.4	122.37	28.62	111.11	1.9569	2.26e-16	1.67e-15	S	Beta-lactamase superfamily domain	-	-
SMb20229	ndiB	7.4	7.16	7.23	49.57	36.39	40.16	7.26333	42.04	2.5331	2.29e-16	1.69e-15	S	Protein of unknown function (DUF3618)	-	-
SMc04399		15.57	17.06	17.39	77.45	64.49	77.81	16.6733	73.25	2.1353	2.47e-16	1.82e-15	I	CoA transferase having broad substrate specificity for short-chain acyl-CoA thioesters with the activity decreasing when the length of the carboxylic acid chain exceeds four carbons	-	ko:K01026
SMc02086		26.99	25	24.62	92.55	98.11	103.54	25.5367	98.0667	1.9412	2.83e-16	2.08e-15	S	membrane metal-binding protein	-	ko:K02238
SMc00657	MA20_11245	184.77	140.77	141.97	539.05	568.41	475.05	155.837	527.503	1.7591	2.89e-16	2.12e-15	S	Protein of unknown function (DUF1153)	-	-
SMc03132	MA20_08305	30.36	31.9	25.96	113.08	105.48	112.96	29.4067	110.507	1.9099	2.92e-16	2.14e-15	E	FAD dependent oxidoreductase	-	ko:K04755,ko:K09471
SMb20590	acyP	6.23	6.12	7.23	35.63	40.07	40.79	6.52667	38.83	2.5728	2.99e-16	2.19e-15	C	acylphosphatase	GO:0003674,GO:0003824,GO:0003998,GO:0016787,GO:0016817,GO:0016818	ko:K01512
SMc01976	mdeA	14.14	14.84	15.79	62.35	70.48	66.52	14.9233	66.45	2.1547	3.01e-16	2.2e-15	E	Cystathionine beta-lyases cystathionine	-	-
SMc02856	pbpC	31.92	26.43	26.23	98.36	115.16	113.58	28.1933	109.033	1.9513	3.21e-16	2.34e-15	M	penicillin-binding protein	-	ko:K05366
SMc01507		149.61	156.26	148.79	460.44	430.22	471.28	151.553	453.98	1.5828	3.23e-16	2.36e-15	T	HWE histidine kinase	-	-
SMb20362		25.82	25.65	25.69	11.62	13.82	6.9	25.72	10.78	-1.2545	3.27e-16	2.38e-15	G	Inositol monophosphatase	-	ko:K01092
SMb21330		3.63	5.34	3.88	33.3	35.47	25.1	4.28333	31.29	2.8689	3.49e-16	2.54e-15	S	Belongs to the UPF0337 (CsbD) family	-	-
SMc02119	aapQ	94.46	86.99	93.26	321.8	273.61	293.69	91.57	296.367	1.6944	3.6e-16	2.6e-15	P	ABC-type amino acid transport system, permease component	GO:0005575,GO:0005623,GO:0005886,GO:0016020,GO:0044464,GO:0071944	ko:K09970
SMa6038	MA20_30170	1.04	2.08	1.47	18.59	18.42	21.34	1.53	19.45	3.6682	5.78e-16	4.17e-15	G	Tripartite ATP-independent periplasmic transporter, DctM component	-	-
SMc00044		23.36	26.17	26.36	8.13	11.52	13.81	25.2967	11.1533	-1.1815	6.52e-16	4.67e-15	E	threonine efflux protein	-	-
SMc02120	aapM	45.8	42.84	44.69	145.6	150.62	160.02	44.4433	152.08	1.7748	6.81e-16	4.88e-15	P	ABC-type amino acid transport system, permease component	GO:0005575,GO:0005623,GO:0005886,GO:0005887,GO:0016020,GO:0016021,GO:0031224,GO:0031226,GO:0044425,GO:0044459,GO:0044464,GO:0071944	ko:K09971
SMc02292	hsdR	37.5	35.16	30.64	125.47	120.22	124.88	34.4333	123.523	1.8429	7.29e-16	5.21e-15	V	Subunit R is required for both nuclease and ATPase activities, but not for modification	-	ko:K01153
SMb20064		25.43	34.12	40.68	12	17.5	15.06	33.41	14.8533	-1.1695	7.35e-16	5.24e-15	L	leucine-zipper of insertion element IS481	-	ko:K07497
SMb21466	prsD	37.89	34.51	33.32	114.24	135.42	133.67	35.24	127.777	1.8583	7.77e-16	5.54e-15	V	ABC-type protease lipase transport system, ATPase and permease components	GO:0005575,GO:0005623,GO:0005886,GO:0006810,GO:0008150,GO:0016020,GO:0044464,GO:0046903,GO:0051179,GO:0051234,GO:0071944	ko:K06148,ko:K12539
SMa1769		24	38.67	29.04	15.1	13.82	8.16	30.57	12.36	-1.3064	8.59e-16	6.11e-15	-	-	-	-
SMa2414		56.7	63.81	39.34	216.86	190.24	213.99	53.2833	207.03	1.9581	8.78e-16	6.24e-15	P	TonB-dependent Receptor Plug Domain	-	ko:K02014
SMa0592		17.78	22.01	18.06	69.32	94.89	88.48	19.2833	84.23	2.127	9.37e-16	6.65e-15	S	HipA-like C-terminal domain	-	ko:K07154
SMb21355		8.43	10.81	8.43	54.21	43.3	47.07	9.22333	48.1933	2.3855	9.44e-16	6.69e-15	S	Oxidoreductase family, C-terminal alpha/beta domain	-	-
SMc04032		24.39	34.25	31.58	115.01	126.21	118.6	30.0733	119.94	1.9958	9.67e-16	6.84e-15	K	Autoinducer binding domain	-	ko:K07782
SMb21127		45.54	45.58	45.89	140.57	164.44	170.69	45.67	158.567	1.7958	1.27e-15	8.95e-15	S	Protein of unknown function (DUF2384)	-	-
SMc01645		80.19	72.27	88.58	255.2	268.54	282.39	80.3467	268.71	1.7417	1.36e-15	9.57e-15	P	Belongs to the ABC transporter superfamily	-	ko:K02031,ko:K02032
SMc00233	yjbB	22.84	19.66	19	86.36	74.62	87.86	20.5	82.9467	2.0166	1.49e-15	1.04e-14	P	Phosphate	-	ko:K03324
SMc01591		63.71	75.14	66.5	201.37	259.79	265.45	68.45	242.203	1.8231	1.5e-15	1.05e-14	-	-	-	-
SMc03970		63.97	66.41	64.23	194.01	211.43	240.97	64.87	215.47	1.7319	1.7e-15	1.19e-14	S	Zn-dependent hydrolases of the beta-lactamase fold	-	-
SMc02160		53.98	51.05	50.04	167.68	168.13	171.32	51.69	169.043	1.7094	1.73e-15	1.2e-14	S	permease	-	-
SMc04264		12.72	13.8	15.12	57.31	64.49	65.89	13.88	62.5633	2.1723	1.77e-15	1.23e-14	K	Helix-turn-helix domain	-	-
SMc00067	lppA	25.43	31.12	15.79	112.69	125.29	100.41	24.1133	112.797	2.2258	1.93e-15	1.34e-14	M	COG4520 Surface antigen	-	-
SMc00232	glmU	40.61	38.81	31.31	143.28	125.75	130.53	36.91	133.187	1.8514	2.15e-15	1.49e-14	M	Catalyzes the last two sequential reactions in the de novo biosynthetic pathway for UDP-N-acetylglucosamine (UDP- GlcNAc). The C-terminal domain catalyzes the transfer of acetyl group from acetyl coenzyme A to glucosamine-1-phosphate (GlcN-1-P) to produce N-acetylglucosamine-1-phosphate (GlcNAc-1-P), which is converted into UDP-GlcNAc by the transfer of uridine 5- monophosphate (from uridine 5-tr…	-	ko:K04042,ko:K11528
SMc03961	sqdB	96.15	109.9	93.13	304.38	324.74	303.73	99.7267	310.95	1.6406	2.17e-15	1.5e-14	GM	dehydratase	GO:0003674,GO:0003824,GO:0005488,GO:0005515,GO:0005575,GO:0005622,GO:0005623,GO:0005737,GO:0006629,GO:0006643,GO:0006664,GO:0006950,GO:0007154,GO:0008146,GO:0008150,GO:0008152,GO:0008270,GO:0008610,GO:0009058,GO:0009247,GO:0009267,GO:0009507,GO:0009532,GO:0009536,GO:0009570,GO:0009605,GO:0009987,GO:0009991,GO:0016036,GO:0016740,GO:0016782,GO:0019899,GO:0019904,GO:0031667,GO:0031668,GO:0031669,GO:…	ko:K06118
SMc04344		4.67	2.6	3.75	34.08	28.1	23.22	3.67333	28.4667	2.9541	2.21e-15	1.53e-14	-	-	-	-
SMc03956	tolA	28.03	22.14	19.13	87.13	105.48	92.25	23.1	94.9533	2.0393	2.24e-15	1.55e-14	S	domain, Protein	-	-
SMc02467	msrA_2	40.74	40.89	40.14	140.57	128.05	165.67	40.59	144.763	1.8345	2.53e-15	1.74e-14	O	Has an important function as a repair enzyme for proteins that have been inactivated by oxidation. Catalyzes the reversible oxidation-reduction of methionine sulfoxide in proteins to methionine	-	ko:K07304
SMa1677		19.85	23.44	21.27	91.78	77.85	88.48	21.52	86.0367	1.9993	2.56e-15	1.77e-14	Q	Amidohydrolase family	-	-
SMc00781	mmsA	184.51	194.03	190.67	656.38	531.1	578.59	189.737	588.69	1.6335	2.74e-15	1.89e-14	C	Methylmalonate-semialdehyde dehydrogenase	GO:0003674,GO:0005488,GO:0005507,GO:0005575,GO:0005622,GO:0005623,GO:0005737,GO:0005739,GO:0006950,GO:0006979,GO:0008150,GO:0043167,GO:0043169,GO:0043226,GO:0043227,GO:0043229,GO:0043231,GO:0044424,GO:0044444,GO:0044464,GO:0046872,GO:0046914,GO:0050896	ko:K00140
SMc02307	hisD	144.81	123.71	122.3	411.64	373.1	416.06	130.273	400.267	1.6194	2.74e-15	1.89e-14	E	Catalyzes the sequential NAD-dependent oxidations of L- histidinol to L-histidinaldehyde and then to L-histidine	GO:0000105,GO:0003674,GO:0003824,GO:0004399,GO:0005575,GO:0005622,GO:0005623,GO:0005737,GO:0005829,GO:0006082,GO:0006520,GO:0006547,GO:0006725,GO:0006807,GO:0008150,GO:0008152,GO:0008652,GO:0009058,GO:0009987,GO:0016053,GO:0016491,GO:0016614,GO:0016616,GO:0018130,GO:0019438,GO:0019752,GO:0034641,GO:0043436,GO:0044237,GO:0044238,GO:0044249,GO:0044281,GO:0044283,GO:0044424,GO:0044444,GO:0044464,GO:…	ko:K00013
SMb20696		75	89.59	73.19	261.39	255.65	250.39	79.26	255.81	1.6904	2.87e-15	1.97e-14	S	Protein of unknown function (DUF2384)	-	-
SMc01593	petR	32.57	35.16	32.38	116.56	114.23	123.62	33.37	118.137	1.8238	3.21e-15	2.2e-14	T	Response regulators consisting of a CheY-like receiver domain and a winged-helix DNA-binding domain	-	ko:K07659
SMc00098	ohrR	29.71	34.51	35.46	121.21	117	125.51	33.2267	121.24	1.8675	4.22e-15	2.88e-14	K	transcriptional regulator	GO:0001067,GO:0003674,GO:0003676,GO:0003677,GO:0005488,GO:0005575,GO:0005622,GO:0005623,GO:0005737,GO:0006355,GO:0008150,GO:0009889,GO:0010468,GO:0010556,GO:0019219,GO:0019222,GO:0031323,GO:0031326,GO:0044212,GO:0044424,GO:0044464,GO:0050789,GO:0050794,GO:0051171,GO:0051252,GO:0060255,GO:0065007,GO:0080090,GO:0097159,GO:1901363,GO:1903506,GO:2000112,GO:2001141	-
SMc02827		58.65	54.04	45.09	185.49	168.13	179.48	52.5933	177.7	1.7565	4.31e-15	2.94e-14	M	Cell wall-associated hydrolases (invasion-associated proteins)	-	-
SMb20998		5.84	4.69	6.42	35.24	37.77	30.12	5.65	34.3767	2.6051	5.78e-15	3.93e-14	G	polysaccharide deacetylase	-	-
SMc01134	ihfB	76.04	80.87	69.58	240.48	226.17	240.97	75.4967	235.873	1.6435	5.86e-15	3.98e-14	K	This protein is one of the two subunits of integration host factor, a specific DNA-binding protein that functions in genetic recombination as well as in transcriptional and translational control	-	ko:K05788
SMc03802	lonD	77.08	73.7	75.33	261	215.11	254.15	75.37	243.42	1.6914	5.96e-15	4.05e-14	S	to the N-terminal domain of Lon protease	-	ko:K01338,ko:K07157
SMc00767		7.66	7.29	7.63	43.37	35.01	43.3	7.52667	40.56	2.43	5.99e-15	4.06e-14	-	-	-	-
SMc01969	aspC4	21.67	20.7	17.53	79	81.07	75.93	19.9667	78.6667	1.9782	6.63e-15	4.47e-14	E	Aspartate tyrosine aromatic aminotransferase	-	-
SMc02831	yejB	26.73	23.96	25.42	100.3	93.51	89.74	25.37	94.5167	1.8974	7.12e-15	4.79e-14	P	ABC transporter	GO:0003674,GO:0005215,GO:0005575,GO:0005623,GO:0005886,GO:0006810,GO:0006857,GO:0008150,GO:0015833,GO:0015893,GO:0016020,GO:0022857,GO:0035672,GO:0042221,GO:0042493,GO:0042884,GO:0042886,GO:0042891,GO:0044464,GO:0050896,GO:0051179,GO:0051234,GO:0055085,GO:0071702,GO:0071705,GO:0071944	ko:K13894
SMc04331	mtbC	80.19	88.94	81.75	251.32	251.96	295.57	83.6267	266.283	1.6709	7.78e-15	5.21e-14	S	B12 binding domain	-	ko:K00548
SMa1602		26.47	28.78	29.7	113.46	91.2	126.76	28.3167	110.473	1.964	8.13e-15	5.43e-14	K	LysR substrate binding domain	-	-
SMc03105	dxr	32.83	28.39	29.44	110.75	130.36	97.9	30.22	113.003	1.9028	8.71e-15	5.81e-14	I	Catalyzes the NADP-dependent rearrangement and reduction of 1-deoxy-D-xylulose-5-phosphate (DXP) to 2-C-methyl-D-erythritol 4-phosphate (MEP)	GO:0000166,GO:0003674,GO:0003824,GO:0005488,GO:0006081,GO:0006082,GO:0006090,GO:0006629,GO:0006644,GO:0006720,GO:0006721,GO:0006793,GO:0006796,GO:0008150,GO:0008152,GO:0008299,GO:0008610,GO:0008654,GO:0009058,GO:0009240,GO:0009987,GO:0016114,GO:0016491,GO:0016614,GO:0016616,GO:0019288,GO:0019637,GO:0019682,GO:0019752,GO:0030145,GO:0030604,GO:0032787,GO:0036094,GO:0043167,GO:0043168,GO:0043169,GO:…	ko:K00099
SMc01728	ada	24.39	18.1	23.15	91.39	85.22	85.97	21.88	87.5267	2.0001	9.84e-15	6.54e-14	FL	Methyltransferase	-	ko:K00567,ko:K10778
SMa2061		11.29	10.29	9.23	46.86	47.9	51.46	10.27	48.74	2.2467	1.02e-14	6.75e-14	T	GvpD gas vesicle protein	-	ko:K08482
SMb20928		34	41.54	37.73	123.14	134.5	152.49	37.7567	136.71	1.8563	1.04e-14	6.91e-14	M	Tricorn protease homolog	-	ko:K03797,ko:K08676
SMc01623	eryA	11.03	10.94	11.11	44.92	53.43	57.73	11.0267	52.0267	2.2383	1.11e-14	7.32e-14	G	FGGY family of carbohydrate kinases, C-terminal domain	-	ko:K00862
SMc02579	p450	36.98	39.72	35.86	129.73	119.76	139.94	37.52	129.81	1.7907	1.15e-14	7.58e-14	Q	cytochrome P450	-	-
SMc01747	hemP	3.63	3.91	2.54	18.59	32.24	32	3.36	27.61	3.0387	1.16e-14	7.62e-14	P	Hemin uptake protein	-	-
SMc00402	irpA	142.47	118.11	115.47	383.37	374.95	384.68	125.35	381	1.6038	1.19e-14	7.81e-14	P	Iron-regulated protein	-	ko:K07231
SMc02522		78.63	81.52	75.6	251.32	243.21	229.05	78.5833	241.193	1.6179	1.23e-14	8.07e-14	IQ	KR domain	-	ko:K00059
SMa0123		26.73	37.24	25.96	12.39	16.12	16.32	29.9767	14.9433	-1.0043	1.26e-14	8.24e-14	-	-	-	-
SMc00137	usg	21.15	15.37	18.87	77.06	72.32	79.07	18.4633	76.15	2.0442	1.54e-14	1.01e-13	E	Usg protein	-	-
SMc00332	MA20_24185	93.04	67.84	73.06	290.05	246.43	262.31	77.98	266.263	1.7717	1.58e-14	1.03e-13	S	Protein of unknown function (FYDLN_acid)	-	-
SMc00897	pmbA	149.87	152.75	116.14	437.98	412.26	463.75	139.587	437.997	1.6498	1.59e-14	1.04e-13	S	Modulator of DNA gyrase	GO:0005575,GO:0005622,GO:0005623,GO:0005737,GO:0005829,GO:0006508,GO:0006807,GO:0008150,GO:0008152,GO:0019538,GO:0043170,GO:0044238,GO:0044424,GO:0044444,GO:0044464,GO:0071704,GO:1901564	ko:K03592
SMb21484	ecfR	12.46	10.03	10.84	52.67	46.98	55.22	11.11	51.6233	2.2162	1.76e-14	1.14e-13	K	Belongs to the sigma-70 factor family. ECF subfamily	-	ko:K03088
SMb20961	exoP	65.92	66.93	62.49	205.63	193	210.22	65.1133	202.95	1.6401	1.9e-14	1.23e-13	D	protein involved in exopolysaccharide biosynthesis	-	ko:K16554
SMc01000	MA20_31625	15.31	23.7	19.94	7.74	5.53	6.28	19.65	6.51667	-1.5923	1.95e-14	1.26e-13	S	PAS domain	-	-
SMc00242	MA20_34830	100.69	76.44	75.47	293.92	294.34	256.04	84.2	281.433	1.7409	1.97e-14	1.27e-13	S	ABC-type transport system, periplasmic component surface lipoprotein	-	ko:K02058
SMb20806		67.21	63.94	65.03	196.33	199.45	222.78	65.3933	206.187	1.6567	1.98e-14	1.28e-13	M	glycosyl transferase family 8	-	-
SMc01329	azoR	9.73	8.99	7.89	35.24	51.59	53.97	8.87	46.9333	2.4036	2e-14	1.29e-13	I	Catalyzes the reductive cleavage of azo bond in aromatic azo compounds to the corresponding amines. Requires NADH, but not NADPH, as an electron donor for its activity	-	ko:K01118
SMc00891		27.12	35.29	29.44	19.36	16.12	10.04	30.6167	15.1733	-1.0128	2.06e-14	1.33e-13	L	'Paired box' domain	-	ko:K07499
SMc01705		79.02	94.54	91.12	287.72	270.39	282.39	88.2267	280.167	1.667	2.14e-14	1.37e-13	S	Aminoacyl-tRNA editing domain	-	ko:K19055
SMc01200		159.73	146.76	128.85	403.12	456.02	448.69	145.113	435.943	1.587	2.15e-14	1.38e-13	S	L,D-transpeptidase catalytic domain	-	-
SMc00397		119.38	114.72	123.9	357.43	340.4	371.5	119.333	356.443	1.5787	2.27e-14	1.46e-13	M	FR47-like protein	-	-
SMc00858	yfiC	8.17	8.59	8.16	43.37	39.61	42.04	8.30667	41.6733	2.3268	2.29e-14	1.46e-13	S	Methyltransferase	-	ko:K15460
SMc03061	aglE	79.54	67.58	66.77	223.83	255.65	211.48	71.2967	230.32	1.6917	2.75e-14	1.76e-13	G	Alpha-glucoside ABC transporter substrate-binding protein	-	ko:K10232
SMc00433	iolE	31.14	30.86	29.57	109.2	111.93	99.78	30.5233	106.97	1.8092	2.89e-14	1.84e-13	G	Sugar phosphate isomerases epimerases	-	ko:K03335
SMa1698		27.25	26.3	24.49	89.84	89.82	112.33	26.0133	97.33	1.9036	3.2e-14	2.04e-13	L	Transposase, IS3 IS911 family protein	-	ko:K07497
SMc01597		75.26	76.18	82.82	229.64	263.02	246.62	78.0867	246.427	1.658	3.6e-14	2.29e-13	E	amino acid	-	-
SMa0015		15.96	14.71	15.92	65.44	67.25	58.99	15.53	63.8933	2.0406	3.75e-14	2.39e-13	J	Elongation factor SelB, winged helix	-	ko:K03833
SMb21334		16.09	10.94	17.53	70.09	65.41	66.52	14.8533	67.34	2.1807	4.34e-14	2.75e-13	M	Protein of unknown function (DUF1236)	-	-
SMb20425		21.02	19.66	21.68	80.16	84.29	74.05	20.7867	79.5	1.9353	4.81e-14	3.04e-13	K	helix_turn_helix ASNC type	-	ko:K15782
SMc01489		27.77	31.64	30.24	115.01	98.57	108.56	29.8833	107.38	1.8453	4.87e-14	3.07e-13	DTZ	EF hand	-	-
SMc02296	hsdM	56.05	45.45	49.51	172.71	188.39	151.24	50.3367	170.78	1.7625	4.91e-14	3.09e-13	V	COG0286 Type I restriction-modification system methyltransferase subunit	-	ko:K03427
SMa0244		6.23	6.38	5.75	29.43	37.77	37.02	6.12	34.74	2.505	5.08e-14	3.2e-13	C	FAD FMN-containing dehydrogenases	-	-
SMa2037		21.54	20.57	15.79	70.48	80.61	80.32	19.3	77.1367	1.9988	5.11e-14	3.21e-13	C	Aldehyde oxidase and xanthine dehydrogenase	-	-
SMc01769		274.44	217.46	223.59	699.75	710.28	705.98	238.497	705.337	1.5643	5.15e-14	3.23e-13	S	protein conserved in bacteria	-	ko:K21470,ko:K21572
SMa2412		11.94	9.12	9.5	41.82	50.67	54.6	10.1867	49.03	2.267	6.1e-14	3.82e-13	K	helix_turn_helix, arabinose operon control protein	-	-
SMc02362	ccmE	11.03	10.94	12.04	52.28	61.72	43.3	11.3367	52.4333	2.2095	6.36e-14	3.97e-13	O	Heme chaperone required for the biogenesis of c-type cytochromes. Transiently binds heme delivered by CcmC and transfers the heme to apo-cytochromes in a process facilitated by CcmF and CcmH	GO:0003674,GO:0003824,GO:0008150,GO:0009987,GO:0016043,GO:0017004,GO:0022607,GO:0034622,GO:0043933,GO:0044085,GO:0065003,GO:0071840	ko:K02197
SMc02121	aapP	203.33	157.17	157.89	579.71	526.49	509.56	172.797	538.587	1.6401	7.2e-14	4.49e-13	E	ABC-type polar amino acid transport system, ATPase component	-	ko:K02028,ko:K09972,ko:K10010
SMc01334	mrcA	218.64	186.08	158.02	580.48	565.18	570.43	187.58	572.03	1.6086	7.46e-14	4.65e-13	M	penicillin-binding protein	-	ko:K05366
SMc03878	phbB	53.46	54.04	55.66	170.78	182.87	165.04	54.3867	172.897	1.6686	8.41e-14	5.23e-13	IQ	Acetoacetyl-CoA reductase	GO:0005575,GO:0005622,GO:0005623,GO:0005737,GO:0044424,GO:0044464	ko:K00023
SMc02122	fpr	353.46	350.55	339.73	885.63	999.55	1033.55	347.913	972.91	1.4836	8.79e-14	5.47e-13	C	Flavodoxin reductases (ferredoxin-NADPH reductases) family 1	-	ko:K00528
SMa2347		3.76	4.95	4.15	29.82	26.72	26.36	4.28667	27.6333	2.6885	9.24e-14	5.74e-13	Q	Methyltransferase domain	-	ko:K15256
SMc01653	ydcT	5.84	8.2	7.89	30.59	43.3	55.85	7.31	43.2467	2.5646	9.46e-14	5.86e-13	P	Belongs to the ABC transporter superfamily	-	ko:K02052
SMb21007	MA20_01005	21.28	26.96	32.11	13.17	13.36	11.3	26.7833	12.61	-1.0868	9.76e-14	6.04e-13	S	Polyketide cyclase / dehydrase and lipid transport	-	-
SMc00245	MA20_34815	51.77	42.58	39.2	161.87	146.48	144.33	44.5167	150.893	1.7611	9.81e-14	6.07e-13	S	ABC transporter	-	ko:K02056
SMc00601	pgsA	94.46	89.2	85.23	281.92	249.2	274.86	89.63	268.66	1.5837	1.03e-13	6.38e-13	I	Belongs to the CDP-alcohol phosphatidyltransferase class-I family	-	ko:K00995,ko:K08744
SMb20892	gguC	16.48	16.93	14.45	60.41	64.03	69.03	15.9533	64.49	2.0152	1.15e-13	7.11e-13	S	protein conserved in bacteria	-	-
SMc02323	ulaR	19.46	24.09	18.46	70.48	84.29	93.5	20.67	82.7567	2.0013	1.44e-13	8.83e-13	K	Transcriptional regulators of sugar metabolism	-	ko:K03477
SMc00946	nnrD	34.9	37.24	31.31	122.37	123.91	106.68	34.4833	117.653	1.7706	2.02e-13	1.24e-12	G	Bifunctional enzyme that catalyzes the epimerization of the S- and R-forms of NAD(P)HX and the dehydration of the S-form of NAD(P)HX at the expense of ADP, which is converted to AMP. This allows the repair of both epimers of NAD(P)HX, a damaged form of NAD(P)H that is a result of enzymatic or heat-dependent hydration	-	-
SMc02525	fdsB	56.83	64.59	61.68	192.07	180.1	210.22	61.0333	194.13	1.6694	2.57e-13	1.57e-12	C	NADH ubiquinone oxidoreductase, NADH-binding (51 kD) subunit	-	ko:K00124,ko:K00335
SMb20477		5.19	3.78	2.94	25.17	29.48	25.1	3.97	26.5833	2.7433	2.62e-13	1.6e-12	EP	Binding-protein-dependent transport system inner membrane component	-	ko:K02033
SMb21046		19.07	17.97	17.26	6.58	9.67	4.39	18.1	6.88	-1.3955	2.62e-13	1.6e-12	L	Transposase and inactivated	-	-
SMb20503	rbsA	19.33	22.01	22.88	8.13	10.13	11.92	21.4067	10.06	-1.0894	2.74e-13	1.67e-12	G	Part of an ABC transporter complex involved in carbohydrate import. Could be involved in ribose, galactose and or methyl galactoside import. Responsible for energy coupling to the transport system	-	ko:K10441
SMc01977		38.15	42.45	40.81	128.57	131.28	140.57	40.47	133.473	1.7216	2.85e-13	1.73e-12	G	ABC-type sugar transport system, periplasmic component	-	ko:K02027
SMc04444	fdsA	156.88	164.47	169.4	491.8	445.88	476.93	163.583	471.537	1.5273	3.03e-13	1.84e-12	C	formate dehydrogenase	-	ko:K00123
SMc00040	ohr	30.1	22.92	29.7	99.91	101.8	101.03	27.5733	100.913	1.8718	3.25e-13	1.97e-12	O	organic hydroperoxide resistance	-	-
SMc00731	yvqK	41.78	43.75	41.61	135.92	131.74	142.45	42.38	136.703	1.6896	3.25e-13	1.97e-12	S	adenosyltransferase	-	ko:K00798
SMc02843	nth	12.85	12.63	13.38	47.63	57.58	62.13	12.9533	55.78	2.1064	3.83e-13	2.31e-12	L	DNA repair enzyme that has both DNA N-glycosylase activity and AP-lyase activity. The DNA N-glycosylase activity releases various damaged pyrimidines from DNA by cleaving the N- glycosidic bond, leaving an AP (apurinic apyrimidinic) site. The AP-lyase activity cleaves the phosphodiester bond 3' to the AP site by a beta-elimination, leaving a 3'-terminal unsaturated sugar and a product with a term…	-	ko:K10773
SMb21222		7.01	8.85	7.63	35.24	41	41.42	7.83	39.22	2.3245	4e-13	2.41e-12	GK	ROK family	-	-
SMb20006		18.81	18.88	19.67	9.68	5.99	8.79	19.12	8.15333	-1.2296	4.08e-13	2.46e-12	S	Pyridoxamine 5'-phosphate oxidase	-	ko:K07006
SMb20612	dctB	18.04	19.01	13.92	71.25	60.8	73.42	16.99	68.49	2.0112	4.15e-13	2.5e-12	T	Signal transduction histidine kinase regulating C4-dicarboxylate transport system	GO:0005575,GO:0005623,GO:0005886,GO:0016020,GO:0044464,GO:0071944	ko:K10125
SMc01641	caiD	7.53	7.81	7.36	37.18	34.55	42.04	7.56667	37.9233	2.3254	4.17e-13	2.51e-12	I	Belongs to the enoyl-CoA hydratase isomerase family	-	ko:K08299
SMb20946	exoY	51.77	52.87	47.77	152.19	155.23	196.42	50.8033	167.947	1.725	4.23e-13	2.54e-12	M	Exopolysaccharide production protein	GO:0005575,GO:0005623,GO:0005886,GO:0016020,GO:0044464,GO:0071944	ko:K00996,ko:K16566
SMc00080	ydfF	80.45	95.32	82.42	249.77	280.98	257.92	86.0633	262.89	1.611	4.9e-13	2.94e-12	K	transcriptional regulator	GO:0003674,GO:0003676,GO:0003677,GO:0003700,GO:0005488,GO:0006355,GO:0008150,GO:0009889,GO:0010035,GO:0010038,GO:0010288,GO:0010468,GO:0010556,GO:0019219,GO:0019222,GO:0031323,GO:0031326,GO:0032791,GO:0042221,GO:0043167,GO:0043169,GO:0046686,GO:0046870,GO:0046872,GO:0046914,GO:0050789,GO:0050794,GO:0050896,GO:0051171,GO:0051252,GO:0060255,GO:0065007,GO:0080090,GO:0097063,GO:0097159,GO:0140110,GO:…	-
SMc02830	yejE	13.49	15.76	14.99	55.76	59.88	65.26	14.7467	60.3	2.0318	5.43e-13	3.25e-12	P	ABC transporter permease	GO:0005575,GO:0005623,GO:0005886,GO:0006810,GO:0006857,GO:0008150,GO:0015833,GO:0015893,GO:0016020,GO:0035672,GO:0042221,GO:0042493,GO:0042884,GO:0042886,GO:0042891,GO:0044464,GO:0050896,GO:0051179,GO:0051234,GO:0055085,GO:0071702,GO:0071705,GO:0071944	ko:K13895
SMa2402		22.06	19.01	16.46	66.22	79.69	77.19	19.1767	74.3667	1.9553	6.16e-13	3.67e-12	E	decarboxylase	-	-
SMb21486	MA20_40020	64.62	63.42	61.15	197.88	193.92	180.1	63.0633	190.633	1.5959	6.28e-13	3.74e-12	EGP	Permeases of the major facilitator superfamily	-	-
SMc01549	MA20_08580	40.48	42.19	42.42	136.7	130.82	134.92	41.6967	134.147	1.6858	6.38e-13	3.8e-12	-	-	-	-
SMc03963	sqdC	15.18	13.41	12.18	58.86	57.58	51.46	13.59	55.9667	2.042	6.46e-13	3.84e-12	GM	NAD(P)H-binding	-	-
SMc03957	tolR	8.56	9.38	6.82	37.18	42.84	40.16	8.25333	40.06	2.2791	7.35e-13	4.37e-12	U	Biopolymer transport protein	-	ko:K03559,ko:K03560
SMb21166	hutI	41.26	53.39	47.5	159.93	164.9	148.73	47.3833	157.853	1.7361	7.37e-13	4.37e-12	Q	imidazolonepropionase activity	-	ko:K01468
SMa0664		56.57	63.55	59.54	184.33	185.17	181.99	59.8867	183.83	1.6181	7.91e-13	4.69e-12	S	Adenylate cyclase	-	-
SMa5034		5.45	4.69	4.95	32.53	32.24	23.22	5.03	29.33	2.5437	8.03e-13	4.76e-12	S	ChrR Cupin-like domain	-	-
SMc04386	aatB	182.31	177.88	167.39	512.71	471.68	475.05	175.86	486.48	1.468	8.06e-13	4.77e-12	E	DegT/DnrJ/EryC1/StrS aminotransferase family	-	ko:K00812
SMc00819	katA	1408.51	1090.19	1015.3	4561.76	3628.32	3341.01	1171.33	3843.7	1.7143	8.62e-13	5.09e-12	P	serves to protect cells from the toxic effects of hydrogen peroxide	GO:0005575,GO:0005623,GO:0042597,GO:0044464	ko:K03781
SMb21555	kefB	39.32	38.81	41.88	123.14	138.19	131.16	40.0033	130.83	1.7095	8.85e-13	5.23e-12	P	Belongs to the monovalent cation proton antiporter 2 (CPA2) transporter (TC 2.A.37) family	-	ko:K03455,ko:K11745,ko:K11747
SMc02109	clpA	1715.64	1888.03	1567.78	4553.24	4529.76	4925.54	1723.82	4669.51	1.4377	8.96e-13	5.28e-12	O	Belongs to the ClpA ClpB family	GO:0000166,GO:0003674,GO:0003824,GO:0004176,GO:0005488,GO:0005524,GO:0005575,GO:0005622,GO:0005623,GO:0005737,GO:0005829,GO:0006508,GO:0006807,GO:0006950,GO:0006979,GO:0008144,GO:0008150,GO:0008152,GO:0008233,GO:0009987,GO:0016462,GO:0016787,GO:0016817,GO:0016818,GO:0016887,GO:0017076,GO:0017111,GO:0019538,GO:0030554,GO:0032553,GO:0032555,GO:0032559,GO:0035639,GO:0036094,GO:0042623,GO:0043167,GO:…	ko:K03694
SMc02189		19.2	25.39	25.56	12.78	8.75	12.55	23.3833	11.36	-1.0415	9.07e-13	5.34e-12	#N/A	#N/A	#N/A	#N/A
SMc00675		81.62	66.41	57.94	218.41	219.26	219.01	68.6567	218.893	1.6728	9.11e-13	5.35e-12	E	Aminotransferase	-	-
SMa1158		120.28	133.73	111.19	371.76	327.5	422.96	121.733	374.073	1.6196	9.18e-13	5.39e-12	T	Universal stress protein family	-	-
SMa5027		10.9	8.2	8.3	39.11	44.68	45.18	9.13333	42.99	2.2348	9.4e-13	5.52e-12	#N/A	#N/A	#N/A	#N/A
SMc04448		25.43	25.91	26.23	81.71	91.66	108.56	25.8567	93.9767	1.8618	9.81e-13	5.75e-12	I	Phospholipase D. Active site motifs.	-	ko:K06132
SMb21199		12.72	8.2	8.43	42.98	53.89	43.93	9.78333	46.9333	2.2622	1.01e-12	5.9e-12	P	Belongs to the ABC transporter superfamily	-	ko:K02031,ko:K02032,ko:K10823,ko:K13896,ko:K15583
SMc02231		18.3	19.14	17.53	7.74	8.29	8.16	18.3233	8.06333	-1.1842	1.07e-12	6.24e-12	DM	FOG TPR repeat, SEL1 subfamily	-	ko:K07126,ko:K13582
SMb20263		31.66	29.82	24.62	96.04	99.03	102.92	28.7	99.33	1.7912	1.2e-12	6.98e-12	ET	ABC-type amino acid transport signal transduction systems, periplasmic component domain	-	ko:K02030
SMc00471	cckA	86.94	83.08	79.21	256.36	231.69	240.97	83.0767	243.007	1.5485	1.21e-12	7.05e-12	T	Histidine kinase	-	ko:K13587
SMc00896	suhB2	72.92	64.33	67.57	220.34	199.45	200.18	68.2733	206.657	1.5978	1.32e-12	7.68e-12	G	Inositol monophosphatase	-	ko:K01092
SMa0995		14.01	13.15	14.58	4.65	2.76	5.02	13.9133	4.14333	-1.7476	1.33e-12	7.73e-12	L	Transposase	-	ko:K07493
SMb20422		10.12	10.55	8.56	38.34	52.05	44.56	9.74333	44.9833	2.2069	1.39e-12	8e-12	C	Zinc-binding dehydrogenase	-	ko:K00001
SMb20424	gabD6	18.43	16.67	17.93	63.9	76.46	63.38	17.6767	67.9133	1.9418	1.41e-12	8.12e-12	C	Dehydrogenase	-	ko:K00135,ko:K15786
SMc02049	gcvP	304.15	232.83	235.76	825.61	798.26	706.61	257.58	776.827	1.5926	1.69e-12	9.69e-12	E	The glycine cleavage system catalyzes the degradation of glycine. The P protein binds the alpha-amino group of glycine through its pyridoxal phosphate cofactor	-	ko:K00281,ko:K00283
SMc02492		17.26	18.23	17.8	7.74	9.67	3.77	17.7633	7.06	-1.3312	1.79e-12	1.02e-11	S	Protein of unknown function (DUF560)	-	-
SMb20942	exoB	12.98	13.93	10.97	50.73	55.74	50.83	12.6267	52.4333	2.054	1.82e-12	1.04e-11	M	UDP-glucose 4-epimerase	-	ko:K01784,ko:K12448
SMb20380		18.81	19.01	20.34	7.74	11.05	8.16	19.3867	8.98333	-1.1097	1.92e-12	1.1e-11	E	Part of the ABC transporter complex PotABCD involved in spermidine putrescine import. Responsible for energy coupling to the transport system	-	ko:K02052
SMb23127		12.07	13.02	12.85	3.87	2.76	2.51	12.6467	3.04667	-2.0535	1.98e-12	1.13e-11	#N/A	#N/A	#N/A	#N/A
SMb20245		14.4	15.89	13.25	66.61	53.89	55.22	14.5133	58.5733	2.0129	1.99e-12	1.13e-11	M	GDP-mannose 4,6 dehydratase	-	ko:K01784,ko:K08678,ko:K12454,ko:K17947
SMc04231	uvrB	235.51	236.61	205.39	602.94	610.32	621.26	225.837	611.507	1.4371	2.04e-12	1.16e-11	L	damaged site, the DNA wraps around one UvrB monomer. DNA wrap is dependent on ATP binding by UvrB and probably causes local melting of the DNA helix, facilitating insertion of UvrB beta-hairpin between the DNA strands. Then UvrB probes one DNA strand for the presence of a lesion. If a lesion is found the UvrA subunits dissociate and the UvrB-DNA preincision complex is formed. This complex is subs…	-	ko:K03702
SMb20931		25.3	29.17	26.63	84.42	99.95	101.66	27.0333	95.3433	1.8184	2.14e-12	1.22e-11	G	sugar ABC transporter substrate-binding protein	-	ko:K10439
SMc04309	cobQ	60.34	45.19	41.48	167.68	169.51	156.26	49.0033	164.483	1.747	2.38e-12	1.35e-11	H	Catalyzes amidations at positions B, D, E, and G on adenosylcobyrinic A,C-diamide. NH(2) groups are provided by glutamine, and one molecule of ATP is hydrogenolyzed for each amidation	-	ko:K02232
SMc00776	pdhS	163.75	172.15	148.66	484.06	468.45	419.82	161.52	457.443	1.5019	2.54e-12	1.44e-11	T	Histidine kinase	-	-
SMc02552		12.33	8.72	8.96	46.08	46.52	42.67	10.0033	45.09	2.1723	2.56e-12	1.45e-11	#N/A	#N/A	#N/A	#N/A
SMc04325	yitJ	344.5	428.03	356.19	1168.32	1069.1	1036.06	376.24	1091.16	1.5361	2.59e-12	1.46e-11	E	Homocysteine S-methyltransferase	-	ko:K00544,ko:K00548
SMc02725	trpE	507.61	411.88	405.29	1289.53	1243.22	1192.32	441.593	1241.69	1.4915	2.76e-12	1.55e-11	EH	component I	-	ko:K13503
SMc01213		36.33	33.34	29.7	118.88	104.56	107.31	33.1233	110.25	1.7349	2.94e-12	1.65e-11	S	zinc protease	-	ko:K07054
SMc00248	ccdA	27.9	30.73	25.69	91.39	101.8	94.76	28.1067	95.9833	1.7719	3.05e-12	1.71e-11	O	Cytochrome c biogenesis protein	-	ko:K06196
SMc00960	tldD	248.61	249.11	226.53	615.72	652.7	673.35	241.417	647.257	1.4228	3.3e-12	1.85e-11	S	modulator of DNA gyrase	GO:0005575,GO:0005622,GO:0005623,GO:0005737,GO:0005829,GO:0044424,GO:0044444,GO:0044464	ko:K03568
SMc01592	petP	36.46	32.55	28.9	110.75	100.88	117.35	32.6367	109.66	1.7485	3.44e-12	1.93e-11	K	Transcriptional regulator	-	-
SMc02727		16.22	15.89	15.92	55.38	71.86	60.87	16.01	62.7033	1.9696	3.46e-12	1.93e-11	S	protein conserved in bacteria	-	-
SMc03186		16.22	13.15	14.32	59.64	53.43	60.87	14.5633	57.98	1.9932	3.47e-12	1.94e-11	K	Transcriptional regulator	-	-
SMa2369		4.28	2.73	3.08	24.01	21.65	22.59	3.36333	22.75	2.7579	3.52e-12	1.96e-11	S	Belongs to the binding-protein-dependent transport system permease family	-	ko:K02057
SMb20078		17.91	16.54	18.6	8.52	3.68	10.04	17.6833	7.41333	-1.2542	3.62e-12	2.02e-11	T	helix_turn_helix, Lux Regulon	-	ko:K02479,ko:K07684
SMb21164	hutG	5.06	4.43	3.88	24.01	30.4	25.1	4.45667	26.5033	2.5721	3.83e-12	2.12e-11	E	N-formylglutamate amidohydrolase	-	ko:K01479
SMc01718	merA_1	7.01	6.38	8.03	30.21	36.39	43.3	7.14	36.6333	2.3592	3.89e-12	2.16e-11	S	SNARE associated Golgi protein	-	-
SMa0869	nodA	16.61	11.72	9.63	58.47	48.37	62.75	12.6533	56.53	2.1595	3.92e-12	2.17e-11	S	N-acyltransferase required for nodulation. Acts in the production of a small, heat-stable compound (Nod) that stimulates mitosis in various plant protoplasts	-	ko:K14658
SMc00371		20.37	17.19	20.2	75.9	66.79	72.17	19.2533	71.62	1.8953	4.21e-12	2.33e-11	S	Domain of unknown function (DUF892)	-	-
SMa1933		8.69	10.16	6.96	45.31	38.23	37.65	8.60333	40.3967	2.2313	4.31e-12	2.38e-11	K	LysR substrate binding domain	-	-
SMb20834		36.72	28.65	31.31	113.08	108.71	103.54	32.2267	108.443	1.7506	5.1e-12	2.81e-11	M	Capsule polysaccharide biosynthesis protein	-	-
SMc02173	fucU	4.15	3.39	2.81	24.4	21.19	22.59	3.45	22.7267	2.7197	5.14e-12	2.83e-11	G	RbsD / FucU transport protein family	-	ko:K02431
SMc02352		9.34	8.59	8.96	38.34	38.69	45.18	8.96333	40.7367	2.1842	5.27e-12	2.9e-11	E	Glutamine synthetase N-terminal domain	-	ko:K01915
SMb20895	chvE	96.02	71.88	88.58	247.84	273.61	283.02	85.4933	268.157	1.6492	5.53e-12	3.03e-11	G	ABC-type xylose transport system, periplasmic component	GO:0005575,GO:0005623,GO:0042597,GO:0044464	ko:K02058,ko:K10546
SMb20280		35.81	29.43	31.31	103.78	105.48	111.7	32.1833	106.987	1.733	5.54e-12	3.03e-11	P	oxidoreductase	-	-
SMb20145		5.84	4.56	5.08	27.11	29.48	28.87	5.16	28.4867	2.4648	5.62e-12	3.07e-11	G	BNR repeat-like domain	-	-
SMb20956	exoL	48.27	59.12	54.06	160.71	174.12	171.32	53.8167	168.717	1.6485	6.42e-12	3.5e-11	M	transferase activity, transferring glycosyl groups	GO:0005575,GO:0005622,GO:0005623,GO:0005737,GO:0044424,GO:0044464	ko:K16558
SMb21523	minD	25.69	25.39	21.14	83.26	87.98	79.7	24.0733	83.6467	1.7969	6.94e-12	3.78e-11	D	Belongs to the ParA family	-	ko:K03609
SMb20668	MA20_16450	7.27	7.42	4.55	34.85	33.16	31.38	6.41333	33.13	2.369	7.77e-12	4.22e-11	I	NAD-binding of NADP-dependent 3-hydroxyisobutyrate dehydrogenase	-	ko:K08319
SMc01849		45.8	44.8	33.05	134.37	129.43	145.59	41.2167	136.463	1.7272	7.8e-12	4.24e-11	V	Beta-lactamase class C and other penicillin binding proteins	-	-
SMc06500		32.05	37.11	23.15	109.2	118.38	104.8	30.77	110.793	1.8483	8.65e-12	4.69e-11	-	-	-	-
SMa1178		6.88	7.29	6.29	32.92	28.1	45.18	6.82	35.4	2.3759	8.66e-12	4.69e-11	S	Rubrerythrin	-	-
SMc04381	opgC	10.25	12.37	13.51	48.79	52.51	50.2	12.0433	50.5	2.068	8.93e-12	4.83e-11	S	OpgC protein	-	-
SMc00170	sinR	153.5	138.94	157.62	403.51	421.93	448.69	150.02	424.71	1.5013	9.1e-12	4.91e-11	K	Autoinducer binding domain	-	ko:K19733
SMb20091		7.14	5.73	6.82	32.14	35.47	30.75	6.56333	32.7867	2.3206	9.42e-12	5.07e-11	S	Domain of unknown function (DUF892)	-	-
SMc01875	lpxC	174.91	144.02	114.94	489.48	427.46	444.3	144.623	453.747	1.6496	9.63e-12	5.18e-11	M	Catalyzes the hydrolysis of UDP-3-O-myristoyl-N- acetylglucosamine to form UDP-3-O-myristoylglucosamine and acetate, the committed step in lipid A biosynthesis	-	ko:K02535
SMa1990		83.69	74.75	83.23	235.83	264.4	220.89	80.5567	240.373	1.5772	1.08e-11	5.82e-11	S	HicB family	-	-
SMb21004		16.22	22.14	22.08	7.74	11.98	8.79	20.1467	9.50333	-1.084	1.1e-11	5.91e-11	S	Domain of unknown function (DU1801)	-	-
SMc01832	ureE	36.98	35.81	28.1	112.3	108.25	112.33	33.63	110.96	1.7222	1.1e-11	5.92e-11	O	Involved in urease metallocenter assembly. Binds nickel. Probably functions as a nickel donor during metallocenter assembly	-	ko:K03187
SMa1635		16.35	13.15	14.45	51.12	87.52	55.22	14.65	64.62	2.1411	1.14e-11	6.13e-11	#N/A	#N/A	#N/A	#N/A
SMa0216		12.2	16.93	16.32	4.26	2.3	9.41	15.15	5.32333	-1.5089	1.27e-11	6.8e-11	G	ABC-type sugar transport system, ATPase component	-	ko:K02056
SMc01335	amiC	31.14	25.52	28.5	92.55	93.97	101.03	28.3867	95.85	1.7556	1.27e-11	6.81e-11	M	N-acetylmuramoyl-L-alanine amidase	-	ko:K01448
SMc01620	eryB	10.12	11.46	12.44	52.67	44.22	46.44	11.34	47.7767	2.0749	1.38e-11	7.39e-11	C	C-terminal domain of alpha-glycerophosphate oxidase	-	ko:K00111,ko:K21054
SMa1079	tspO	27.51	21.36	23.95	83.26	98.57	77.81	24.2733	86.5467	1.8341	1.48e-11	7.88e-11	T	TspO/MBR family	-	ko:K05770
SMa2269		12.46	14.71	13.78	4.26	6.45	2.51	13.65	4.40667	-1.6311	1.53e-11	8.13e-11	L	DNA primase small subunit	-	-
SMa0615		12.59	12.89	14.72	57.7	45.14	62.75	13.4	55.1967	2.0423	1.7e-11	9.07e-11	C	cytochrome C oxidase mono-heme subunit FixO	-	ko:K00405
SMb20536		5.71	5.99	7.09	27.49	45.14	28.87	6.26333	33.8333	2.4334	1.83e-11	9.71e-11	S	protein conserved in bacteria	-	-
SMa2071		4.67	4.95	4.28	27.49	23.03	27.61	4.63333	26.0433	2.4908	2.07e-11	1.09e-10	#N/A	#N/A	#N/A	#N/A
SMa2041	xdhB	12.46	11.2	11.77	42.6	62.18	45.81	11.81	50.1967	2.0876	2.08e-11	1.1e-10	C	Aerobic-type carbon monoxide dehydrogenase, middle subunit CoxM	-	ko:K03519
SMc00487	MA20_09125	104.71	99.88	90.18	282.69	257.03	302.47	98.2567	280.73	1.5146	2.1e-11	1.11e-10	T	Belongs to the BolA IbaG family	-	-
SMc01959		11.94	12.63	15.25	3.1	5.07	5.02	13.2733	4.39667	-1.594	2.22e-11	1.17e-10	L	Transposase	-	ko:K07483
SMb20206	pqqC	5.45	4.95	5.62	26.33	28.1	30.75	5.34	28.3933	2.4106	2.24e-11	1.18e-10	H	Ring cyclization and eight-electron oxidation of 3a-(2- amino-2-carboxyethyl)-4,5-dioxo-4,5,6,7,8,9-hexahydroquinoline- 7,9-dicarboxylic-acid to PQQ	-	ko:K06136,ko:K06137,ko:K06138
SMc01814	preT	179.97	182.44	176.35	499.55	450.49	565.41	179.587	505.15	1.492	2.27e-11	1.19e-10	E	dihydropyrimidine dehydrogenase	-	ko:K17722
SMc02445	bioC	50.73	59.25	49.11	147.54	172.27	175.08	53.03	164.963	1.6373	2.29e-11	1.2e-10	Q	(SAM)-dependent	-	-
SMa1734		18.17	17.84	17.13	8.52	8.75	8.79	17.7133	8.68667	-1.028	2.47e-11	1.3e-10	S	Amidohydrolase	-	-
SMa0011	selA	9.73	13.28	10.97	45.31	46.52	50.83	11.3267	47.5533	2.0698	2.75e-11	1.43e-10	E	L-seryl-tRNA selenium transferase	-	ko:K01042
SMa0977	tnp1	10.9	14.98	11.91	4.26	4.15	2.51	12.5967	3.64	-1.791	2.78e-11	1.45e-10	L	Transposase for insertion sequence element IS1086	-	ko:K07482
SMc01833	MA20_18330	30.49	29.04	24.49	90.23	91.66	97.27	28.0067	93.0533	1.7323	2.87e-11	1.5e-10	S	Antibiotic biosynthesis monooxygenase	-	-
SMb20076		2.98	3	2.54	21.69	22.57	15.06	2.84	19.7733	2.7996	2.88e-11	1.5e-10	S	Belongs to the short-chain dehydrogenases reductases (SDR) family	-	-
SMb20478		8.95	7.03	6.29	39.11	30.86	36.4	7.42333	35.4567	2.2559	2.91e-11	1.52e-10	P	ATPases associated with a variety of cellular activities	-	ko:K02031,ko:K02034,ko:K12371
SMb20888	MA20_32430	13.49	10.55	13.38	46.08	53.43	53.34	12.4733	50.95	2.0302	2.94e-11	1.53e-10	E	Transglutaminase-like	-	-
SMc01903	clpP	663.06	740.42	670.49	1693.04	1880.26	1939.09	691.323	1837.46	1.4103	3.03e-11	1.57e-10	OU	Cleaves peptides in various proteins in a process that requires ATP hydrolysis. Has a chymotrypsin-like activity. Plays a major role in the degradation of misfolded proteins	-	ko:K01358
SMc01127	olsB	100.56	110.29	101.82	267.59	306.31	335.1	104.223	303	1.5396	3.16e-11	1.64e-10	S	Hemolysin	-	ko:K22310
SMc00783		34.9	31.77	27.43	103.78	121.14	91.62	31.3667	105.513	1.7501	3.24e-11	1.68e-10	O	Peptidase family M48	-	-
SMc04163		45.54	45.58	39.2	142.12	129.9	128.65	43.44	133.557	1.6204	3.29e-11	1.7e-10	K	LysR substrate binding domain	-	-
SMb20664		15.83	14.71	16.19	54.99	64.49	56.48	15.5767	58.6533	1.9128	3.69e-11	1.91e-10	K	FCD	-	-
SMb20035		11.94	13.41	14.72	5.03	4.61	4.39	13.3567	4.67667	-1.514	4.25e-11	2.19e-10	G	Permease	-	ko:K21393
SMb21221		24.26	21.75	25.16	77.06	101.34	75.93	23.7233	84.7767	1.8374	4.29e-11	2.21e-10	G	Bacterial extracellular solute-binding protein	-	ko:K02027
SMc00195		2.72	1.3	1.34	14.72	17.04	16.32	1.78667	16.0267	3.1651	4.68e-11	2.4e-10	M	Sulfatase	-	-
SMc04406	lpxE	17.91	16.93	16.99	63.12	57.58	67.77	17.2767	62.8233	1.8625	5.22e-11	2.67e-10	I	PAP2 superfamily	-	ko:K19302
SMc01531	kdgK	32.18	30.47	28.9	97.2	91.66	107.94	30.5167	98.9333	1.6969	5.24e-11	2.68e-10	G	Sugar kinases, ribokinase family	GO:0000166,GO:0003674,GO:0003824,GO:0005488,GO:0005524,GO:0005975,GO:0006793,GO:0006796,GO:0008144,GO:0008150,GO:0008152,GO:0008673,GO:0009987,GO:0016301,GO:0016310,GO:0016740,GO:0016772,GO:0016773,GO:0017076,GO:0019200,GO:0030554,GO:0032553,GO:0032555,GO:0032559,GO:0035639,GO:0036094,GO:0043167,GO:0043168,GO:0044237,GO:0044238,GO:0044262,GO:0046835,GO:0071704,GO:0097159,GO:0097367,GO:1901265,GO:…	ko:K00874
SMc02259	hisJ	61.76	50.26	44.82	157.22	173.19	158.14	52.28	162.85	1.6392	5.29e-11	2.7e-10	ET	ABC-type amino acid transport signal transduction systems, periplasmic component domain	-	ko:K02030
SMa2371	codA	10.51	8.07	8.56	42.21	37.31	38.91	9.04667	39.4767	2.1255	5.33e-11	2.73e-10	F	Amidohydrolase family	-	ko:K01485
SMc01224	trxB	246.93	228.4	188.8	638.57	567.95	688.41	221.377	631.643	1.5126	5.42e-11	2.77e-10	C	Belongs to the class-II pyridine nucleotide-disulfide oxidoreductase family	-	ko:K00384
SMb21558		18.43	12.76	14.85	4.65	6.45	8.16	15.3467	6.42	-1.2573	5.77e-11	2.94e-10	C	[2Fe-2S] binding domain	-	ko:K13483
SMb20613	dctD	5.58	9.51	6.82	38.34	29.48	42.04	7.30333	36.62	2.326	6.54e-11	3.33e-10	T	Response regulator containing CheY-like receiver, AAA-type ATPase, and DNA-binding domains	-	ko:K10126
SMc03808	ftsK	35.94	37.5	34.12	110.37	106.4	119.23	35.8533	112	1.6433	7.12e-11	3.61e-10	D	DNA segregation ATPase FtsK SpoIIIE and related proteins	-	ko:K03466
SMb20826		12.07	12.76	10.44	47.24	58.04	39.53	11.7567	48.27	2.0376	7.39e-11	3.74e-10	L	Helix-turn-helix domain	-	ko:K07483
SMc00812		3.76	4.43	2.27	19.75	23.03	23.85	3.48667	22.21	2.6713	8.08e-11	4.09e-10	E	Glyoxalase/Bleomycin resistance protein/Dioxygenase superfamily	-	-
SMa1163	cadA	23.62	24.87	22.48	96.04	72.32	77.81	23.6567	82.0567	1.7944	8.4e-11	4.25e-10	P	E1-E2 ATPase	-	-
SMc00538	grlA	467.64	496.39	439.95	1134.24	1227.56	1316.57	467.993	1226.12	1.3895	8.68e-11	4.38e-10	O	Belongs to the glutaredoxin family. Monothiol subfamily	-	ko:K07390
SMc02095	rseP	113.93	111.86	87.37	290.05	298.02	308.75	104.387	298.94	1.5179	8.8e-11	4.44e-10	M	zinc metalloprotease	-	ko:K11749
SMb20890	ilvD2	27.12	20.31	23.42	72.42	85.22	94.13	23.6167	83.9233	1.8293	9.28e-11	4.68e-10	EG	Belongs to the IlvD Edd family	-	ko:K13875
SMb21285	uraH	11.03	13.54	11.11	46.86	47.9	47.07	11.8933	47.2767	1.991	9.49e-11	4.78e-10	S	Belongs to the transthyretin family. 5-hydroxyisourate hydrolase subfamily	-	ko:K07127
SMa1979		10.77	12.11	12.71	54.99	37.77	57.73	11.8633	50.1633	2.0801	9.59e-11	4.83e-10	K	LysR substrate binding domain	-	-
SMb20149		18.17	17.32	16.73	65.06	56.2	65.89	17.4067	62.3833	1.8415	1.23e-10	6.16e-10	S	protein conserved in bacteria	-	ko:K22129
SMc03085	fdhD	18.04	18.23	16.86	61.96	58.96	68.4	17.71	63.1067	1.8332	1.24e-10	6.23e-10	C	Required for formate dehydrogenase (FDH) activity. Acts as a sulfur carrier protein that transfers sulfur from IscS to the molybdenum cofactor prior to its insertion into FDH	-	ko:K02379
SMc00156		11.81	14.45	13.51	57.7	49.75	47.07	13.2567	51.5067	1.958	1.33e-10	6.65e-10	S	Glutathione-dependent formaldehyde-activating enzyme	-	-
SMc00925		42.43	35.94	33.45	122.76	120.22	107.94	37.2733	116.973	1.65	1.34e-10	6.67e-10	S	ErfK YbiS YcfS YnhG family protein	-	-
SMb22017		54.24	47.79	44.16	140.18	168.59	138.69	48.73	149.153	1.6139	1.51e-10	7.5e-10	K	lacI family	-	ko:K02529
SMb20243		7.01	5.21	6.56	37.56	28.1	26.98	6.26	30.88	2.3024	1.65e-10	8.18e-10	M	Glycosyl transferase 4-like domain	-	-
SMc00488	purL	336.33	282.05	246.73	898.8	746.67	824.58	288.37	823.35	1.5136	1.66e-10	8.24e-10	F	Part of the phosphoribosylformylglycinamidine synthase complex involved in the purines biosynthetic pathway. Catalyzes the ATP-dependent conversion of formylglycinamide ribonucleotide (FGAR) and glutamine to yield formylglycinamidine ribonucleotide (FGAM) and glutamate. The FGAM synthase complex is composed of three subunits. PurQ produces an ammonia molecule by converting glutamine to glutamate.…	-	ko:K01952
SMb20707	cyaG2	40.87	38.81	41.75	117.34	117.92	149.98	40.4767	128.413	1.6656	1.71e-10	8.48e-10	T	Adenylate cyclase	-	ko:K01768
SMa2259		7.27	5.86	8.16	36.01	27.64	38.28	7.09667	33.9767	2.2593	1.75e-10	8.64e-10	-	-	-	-
SMc02942	pal	65.79	58.21	45.89	177.75	183.79	161.9	56.63	174.48	1.6234	1.75e-10	8.65e-10	M	Belongs to the ompA family	-	ko:K03640
SMc04330	mttB2	70.85	71.88	63.16	206.79	181.49	200.18	68.63	196.153	1.5151	1.84e-10	9.1e-10	H	Trimethylamine methyltransferase	-	ko:K14083
SMc01120	MA20_23830	30.23	29.69	28.5	90.62	86.6	115.47	29.4733	97.5633	1.7269	1.95e-10	9.63e-10	T	Universal stress protein	-	-
SMa2299		1.43	0.65	1.34	12.39	11.98	13.18	1.14	12.5167	3.4567	2.03e-10	1e-09	-	-	-	-
SMc01992		23.23	19.53	22.08	65.06	80.15	80.95	21.6133	75.3867	1.8024	2.14e-10	1.06e-09	E	COG1063 Threonine dehydrogenase and related Zn-dependent dehydrogenases	-	ko:K05351
SMb20755	pccB	21.15	18.36	18.73	62.35	79.23	64.01	19.4133	68.53	1.8197	2.33e-10	1.14e-09	I	Acetyl-CoA carboxylase, carboxyltransferase component (subunits alpha and beta)	GO:0003674,GO:0003824,GO:0005575,GO:0005622,GO:0005623,GO:0005737,GO:0005739,GO:0005759,GO:0006082,GO:0006629,GO:0006631,GO:0008150,GO:0008152,GO:0009056,GO:0009062,GO:0009987,GO:0016042,GO:0016054,GO:0016421,GO:0016874,GO:0016885,GO:0019752,GO:0031974,GO:0032787,GO:0043226,GO:0043227,GO:0043229,GO:0043231,GO:0043233,GO:0043436,GO:0044237,GO:0044238,GO:0044242,GO:0044248,GO:0044255,GO:0044281,GO:…	ko:K01966
SMc02276	pncB	56.44	45.19	43.35	154.12	145.56	141.2	48.3267	146.96	1.6045	2.42e-10	1.19e-09	F	Catalyzes the synthesis of beta-nicotinate D- ribonucleotide from nicotinate and 5-phospho-D-ribose 1-phosphate at the expense of ATP	-	ko:K00763
SMa0310		19.2	15.89	18.2	10.84	10.13	5.65	17.7633	8.87333	-1.0014	3.01e-10	1.47e-09	K	transcriptional regulator	GO:0003674,GO:0003676,GO:0003677,GO:0003700,GO:0005488,GO:0006139,GO:0006351,GO:0006355,GO:0006725,GO:0006807,GO:0008150,GO:0008152,GO:0009058,GO:0009059,GO:0009889,GO:0009987,GO:0010467,GO:0010468,GO:0010556,GO:0016070,GO:0018130,GO:0019219,GO:0019222,GO:0019438,GO:0031323,GO:0031326,GO:0032774,GO:0034641,GO:0034645,GO:0034654,GO:0043170,GO:0043565,GO:0044237,GO:0044238,GO:0044249,GO:0044260,GO:…	-
SMc00228	recG	26.47	27.48	23.95	90.23	77.85	85.35	25.9667	84.4767	1.7019	3.14e-10	1.54e-09	L	Critical role in recombination and DNA repair. Helps process Holliday junction intermediates to mature products by catalyzing branch migration. Has a DNA unwinding activity characteristic of a DNA helicase with a 3'- to 5'- polarity. Unwinds branched duplex DNA (Y-DNA)	GO:0003674,GO:0003678,GO:0003724,GO:0003824,GO:0004003,GO:0004004,GO:0004386,GO:0005575,GO:0005622,GO:0005623,GO:0005737,GO:0005829,GO:0006139,GO:0006725,GO:0006807,GO:0006996,GO:0008026,GO:0008094,GO:0008150,GO:0008152,GO:0008186,GO:0009314,GO:0009379,GO:0009628,GO:0009987,GO:0010501,GO:0016043,GO:0016070,GO:0016462,GO:0016787,GO:0016817,GO:0016818,GO:0016887,GO:0017111,GO:0032392,GO:0032508,GO:…	ko:K03655
SMc00882	dgoA	34.13	35.29	26.23	109.98	92.12	110.45	31.8833	104.183	1.7083	3.27e-10	1.59e-09	G	Aldolase	GO:0003674,GO:0003824,GO:0005975,GO:0006082,GO:0008150,GO:0008152,GO:0008674,GO:0009056,GO:0009987,GO:0016052,GO:0016054,GO:0016829,GO:0016830,GO:0016832,GO:0019520,GO:0019583,GO:0019584,GO:0019752,GO:0032787,GO:0034192,GO:0034194,GO:0043436,GO:0044237,GO:0044238,GO:0044248,GO:0044262,GO:0044275,GO:0044281,GO:0044282,GO:0046176,GO:0046395,GO:0071704,GO:0072329,GO:1901575	ko:K01631
SMc02065	tatC	56.05	48.57	51.11	158.77	147.4	148.73	51.91	151.633	1.5465	3.52e-10	1.71e-09	U	Part of the twin-arginine translocation (Tat) system that transports large folded proteins containing a characteristic twin-arginine motif in their signal peptide across membranes. Together with TatB, TatC is part of a receptor directly interacting with Tat signal peptides	-	ko:K03118
SMb20294		14.01	14.19	13.11	44.92	57.58	53.34	13.77	51.9467	1.9155	3.71e-10	1.8e-09	K	FCD	-	ko:K22104
SMa1765		25.17	27.09	29.3	87.13	89.82	87.86	27.1867	88.27	1.699	3.72e-10	1.8e-09	S	Bacterial protein of unknown function (DUF937)	-	-
SMc01163		11.68	13.02	11.11	54.6	39.15	48.32	11.9367	47.3567	1.9882	3.76e-10	1.82e-09	S	oxidoreductase	-	-
SMc04403	dcp	120.54	101.57	100.89	313.28	272.69	323.18	107.667	303.05	1.493	3.86e-10	1.87e-09	E	peptidyl-dipeptidase Dcp	GO:0003674,GO:0003824,GO:0004180,GO:0005575,GO:0005622,GO:0005623,GO:0005737,GO:0005829,GO:0006508,GO:0006807,GO:0008150,GO:0008152,GO:0008233,GO:0008238,GO:0016787,GO:0019538,GO:0030288,GO:0030313,GO:0031975,GO:0042597,GO:0043170,GO:0044238,GO:0044424,GO:0044444,GO:0044464,GO:0070011,GO:0071704,GO:0140096,GO:1901564	ko:K01284
SMc04284	cobA	38.93	32.55	33.32	110.75	107.79	104.8	34.9333	107.78	1.6254	3.93e-10	1.9e-09	H	Belongs to the precorrin methyltransferase family	-	ko:K02302,ko:K02303
SMc00533	sufS	954.1	983.93	898.63	2460.95	2394.77	2245.96	945.553	2367.23	1.324	3.98e-10	1.92e-09	E	Belongs to the class-V pyridoxal-phosphate-dependent aminotransferase family	-	ko:K11717
SMc02353		14.14	10.94	9.63	50.34	48.37	40.16	11.57	46.29	2.0003	4.01e-10	1.93e-09	K	Helix-turn-helix domain, rpiR family	-	-
SMc00651	MA20_46305	15.44	15.76	12.98	46.86	55.27	65.26	14.7267	55.7967	1.9217	4.18e-10	2.01e-09	S	Protein of unknown function (DUF1134)	-	-
SMb20370		8.69	7.55	8.3	38.72	30.86	37.02	8.18	35.5333	2.119	4.19e-10	2.02e-09	V	ATPases associated with a variety of cellular activities	-	ko:K02003,ko:K05685,ko:K09810
SMc02846	pfkB	63.84	50.79	48.97	160.32	160.3	165.67	54.5333	162.097	1.5716	4.47e-10	2.15e-09	G	Sugar kinases, ribokinase family	-	ko:K00847,ko:K00856
SMb21128		44.77	47.01	41.61	130.5	129.43	131.78	44.4633	130.57	1.5541	4.5e-10	2.16e-09	S	RES	-	-
SMc01944		7.53	10.42	6.96	36.79	47.9	29.49	8.30333	38.06	2.1965	4.59e-10	2.2e-09	I	Serine aminopeptidase, S33	-	ko:K00433
SMc00294	aatC	175.69	163.29	137.28	441.46	426.54	417.94	158.753	428.647	1.433	4.98e-10	2.39e-09	E	Aminotransferase	GO:0003674,GO:0003824,GO:0004021,GO:0006082,GO:0006090,GO:0006520,GO:0006522,GO:0006523,GO:0006807,GO:0008150,GO:0008152,GO:0008483,GO:0008652,GO:0009058,GO:0009078,GO:0009079,GO:0009987,GO:0016053,GO:0016740,GO:0016769,GO:0019272,GO:0019752,GO:0030632,GO:0032787,GO:0042851,GO:0042852,GO:0043436,GO:0044237,GO:0044238,GO:0044249,GO:0044281,GO:0044283,GO:0046144,GO:0046145,GO:0046394,GO:0046416,GO:…	ko:K14261
SMb20108	gsiB	9.34	8.07	8.83	27.49	41.92	54.6	8.74667	41.3367	2.2406	5.57e-10	2.66e-09	E	ABC-type dipeptide transport system, periplasmic component	-	ko:K02035
SMb20838		36.85	37.63	30.24	110.75	99.03	117.35	34.9067	109.043	1.6433	5.66e-10	2.7e-09	Q	COG2931 RTX toxins and related Ca2 -binding proteins	-	-
SMc02167	frcK	18.81	16.15	14.32	54.6	59.42	62.75	16.4267	58.9233	1.8428	5.89e-10	2.81e-09	H	Phosphoribulokinase / Uridine kinase family	-	-
SMc01012		58.39	47.27	47.37	152.96	143.25	156.88	51.01	151.03	1.566	6.2e-10	2.95e-09	C	nitroreductase	-	-
SMb21183	htpG	249	238.69	247.67	624.24	638.42	852.82	245.12	705.16	1.5245	6.49e-10	3.08e-09	O	Molecular chaperone. Has ATPase activity	-	ko:K04079
SMc04404		7.4	9.64	7.23	30.21	35.93	42.04	8.09	36.06	2.1562	6.89e-10	3.27e-09	E	efflux protein	-	-
SMc01461	uvrD	214.88	197.41	167.39	523.94	495.17	531.52	193.227	516.877	1.4195	6.9e-10	3.27e-09	L	DNA helicase	-	ko:K03657
SMc01166	iolD	67.86	70.06	63.42	180.46	181.49	203.32	67.1133	188.423	1.4893	6.99e-10	3.31e-09	E	Belongs to the TPP enzyme family	-	ko:K03336
SMc04458	secA	1167.03	1093.05	974.76	2943.46	2661.47	2653.23	1078.28	2752.72	1.3521	7.32e-10	3.46e-09	U	Part of the Sec protein translocase complex. Interacts with the SecYEG preprotein conducting channel. Has a central role in coupling the hydrolysis of ATP to the transfer of proteins into and across the cell membrane, serving both as a receptor for the preprotein-SecB complex and as an ATP-driven molecular motor driving the stepwise translocation of polypeptide chains across the membrane	GO:0000166,GO:0002790,GO:0003674,GO:0003824,GO:0005215,GO:0005488,GO:0005524,GO:0005575,GO:0005622,GO:0005623,GO:0005737,GO:0005829,GO:0005886,GO:0005887,GO:0006810,GO:0008104,GO:0008144,GO:0008150,GO:0008320,GO:0008565,GO:0009306,GO:0009987,GO:0015031,GO:0015399,GO:0015405,GO:0015440,GO:0015450,GO:0015462,GO:0015627,GO:0015628,GO:0015833,GO:0016020,GO:0016021,GO:0016462,GO:0016787,GO:0016817,GO:…	ko:K03070
SMc00860	ispB	130.41	116.55	95.67	310.57	322.44	324.44	114.21	319.15	1.4825	7.68e-10	3.62e-09	H	Belongs to the FPP GGPP synthase family	GO:0003674,GO:0003824,GO:0004659,GO:0005488,GO:0005515,GO:0005575,GO:0005622,GO:0005623,GO:0005737,GO:0005829,GO:0006066,GO:0006629,GO:0006720,GO:0006732,GO:0006733,GO:0006743,GO:0006744,GO:0008150,GO:0008152,GO:0008299,GO:0008610,GO:0009058,GO:0009108,GO:0009987,GO:0016093,GO:0016094,GO:0016740,GO:0016765,GO:0042180,GO:0042181,GO:0042802,GO:0044237,GO:0044238,GO:0044249,GO:0044255,GO:0044281,GO:…	ko:K02523
SMb21265	redB	17.91	18.49	16.19	58.86	68.63	55.85	17.53	61.1133	1.8017	7.78e-10	3.67e-09	M	Glycosyl transferases group 1	-	-
SMc03880	phaR	148.7	150.66	141.3	414.74	391.53	359.58	146.887	388.617	1.4036	7.84e-10	3.69e-09	S	synthesis repressor, PhaR	-	-
SMc03136		7.4	6.9	6.02	23.62	37.31	35.77	6.77333	32.2333	2.2506	8.87e-10	4.16e-09	D	Antitoxin component of a toxin-antitoxin (TA) module	-	-
SMc04398		3.89	2.6	3.35	16.26	20.73	23.85	3.28	20.28	2.6283	8.89e-10	4.17e-09	I	Enoyl-CoA hydratase/isomerase	-	-
SMa1675		15.83	14.58	18.73	6.2	11.98	5.02	16.38	7.73333	-1.0828	9.05e-10	4.24e-09	S	Short repeat of unknown function (DUF308)	-	-
SMc02867	acrF	979.14	995.26	1038.72	2437.33	2488.28	2662.64	1004.37	2529.42	1.3325	1e-09	4.69e-09	V	efflux pump	-	ko:K18138
SMc01582	mdh1	53.46	46.88	49.91	132.83	146.02	181.36	50.0833	153.403	1.6149	1.09e-09	5.1e-09	C	alcohol dehydrogenase	-	ko:K00001,ko:K00043
SMb20005	gstA	12.98	13.54	15.92	7.36	7.83	2.51	14.1467	5.9	-1.2617	1.18e-09	5.48e-09	O	Glutathione S-transferase	GO:0003674,GO:0003824,GO:0004364,GO:0005488,GO:0005515,GO:0005575,GO:0006950,GO:0008150,GO:0009635,GO:0009636,GO:0016740,GO:0016765,GO:0032991,GO:0042221,GO:0042802,GO:0042803,GO:0046983,GO:0050896	ko:K00799
SMa1720		10.12	8.2	10.17	39.5	32.24	49.58	9.49667	40.44	2.0903	1.2e-09	5.59e-09	K	LysR substrate binding domain	-	-
SMb21667		12.98	11.2	17.66	6.2	6.45	4.39	13.9467	5.68	-1.296	1.2e-09	5.59e-09	#N/A	#N/A	#N/A	#N/A
SMa1243	pazS	213.71	233.22	218.5	599.84	537.09	722.3	221.81	619.743	1.4823	1.26e-09	5.83e-09	C	pseudoazurin	GO:0005575,GO:0005623,GO:0042597,GO:0044464	-
SMc00804		19.33	23.44	20.07	73.19	75.54	62.75	20.9467	70.4933	1.7508	1.29e-09	5.95e-09	KT	RESPONSE REGULATOR receiver	-	-
SMc02879	cutC	26.34	22.14	26.63	94.88	74.16	80.95	25.0367	83.33	1.7348	1.3e-09	6.02e-09	P	Participates in the control of copper homeostasis	-	ko:K06201
SMa2404		33.61	34.38	24.35	112.3	124.83	80.95	30.78	106.027	1.7844	1.34e-09	6.19e-09	Q	IucA / IucC family	-	ko:K03894
SMc00996	dac	57.61	54.04	48.17	150.64	157.53	146.84	53.2733	151.67	1.5095	1.39e-09	6.43e-09	M	Belongs to the peptidase S11 family	-	ko:K01286
SMc02519	glpS	36.85	43.23	38.8	111.14	124.37	122.37	39.6267	119.293	1.59	1.42e-09	6.55e-09	P	Belongs to the ABC transporter superfamily	-	ko:K17324
SMa0117		9.99	13.41	10.97	3.1	5.99	3.14	11.4567	4.07667	-1.4907	1.58e-09	7.27e-09	K	MerR HTH family regulatory protein	-	ko:K18997
SMc00384	MA20_19890	24.91	19.01	19.27	77.45	68.17	67.77	21.0633	71.13	1.7557	1.7e-09	7.8e-09	K	MarR family	-	-
SMc00367		122.23	127.61	135.68	310.57	384.62	387.82	128.507	361.003	1.4902	1.72e-09	7.88e-09	S	Putative lumazine-binding	-	-
SMc04176	kefA	46.19	45.45	38.94	120.82	139.57	124.25	43.5267	128.213	1.5586	1.72e-09	7.9e-09	M	mechanosensitive ion channel	-	ko:K05802
SMc00021	ccrM	19.07	19.79	19	63.9	59.42	72.17	19.2867	65.1633	1.7565	1.79e-09	8.19e-09	L	Belongs to the N(4) N(6)-methyltransferase family	-	ko:K13581
SMb21136		6.23	5.73	7.09	24.01	32.7	32.63	6.35	29.78	2.2295	1.95e-09	8.92e-09	E	Binding-protein-dependent transport system inner membrane component	-	ko:K02029
SMc00074	MA20_18100	149.74	141.03	133.4	366.72	346.85	400.37	141.39	371.313	1.393	1.97e-09	9e-09	T	Sensory box GGDEF family protein	-	ko:K13245
SMc01622		5.97	5.21	7.09	24.78	32.7	28.87	6.09	28.7833	2.2407	2.11e-09	9.62e-09	EH	D-isomer specific 2-hydroxyacid dehydrogenase, catalytic domain	-	ko:K00058
SMc03139	frlB	30.88	30.86	27.83	82.87	115.62	90.37	29.8567	96.2867	1.6893	2.14e-09	9.76e-09	M	SIS domain	-	ko:K19510
SMb20259		18.43	18.23	17.93	53.05	64.49	72.79	18.1967	63.4433	1.8018	2.19e-09	9.97e-09	EM	Belongs to the DapA family	-	ko:K21062
SMb20773		18.04	18.1	18.87	57.7	64.49	64.01	18.3367	62.0667	1.7591	2.22e-09	1.01e-08	K	FCD	-	ko:K11475
SMc02149		32.83	33.21	23.95	105.72	87.98	96.01	29.9967	96.57	1.6868	2.29e-09	1.04e-08	-	-	-	-
SMc04194		86.29	88.42	85.23	237.38	223.86	233.44	86.6467	231.56	1.4182	2.31e-09	1.05e-08	#N/A	#N/A	#N/A	#N/A
SMb20988		12.98	11.85	14.85	5.81	4.15	8.16	13.2267	6.04	-1.1308	2.48e-09	1.13e-08	L	NUDIX hydrolase	-	-
SMb20277		14.66	14.84	13.38	47.24	69.09	45.18	14.2933	53.8367	1.9132	2.51e-09	1.14e-08	H	Aminotransferase class-III	-	-
SMa1545		17.91	20.31	22.48	64.28	69.55	72.17	20.2333	68.6667	1.7629	2.61e-09	1.18e-08	C	Belongs to the complex I subunit 6 family	-	ko:K00339
SMb20122		6.88	7.94	10.17	1.16	0.92	1.88	8.33	1.32	-2.6578	2.73e-09	1.23e-08	#N/A	#N/A	#N/A	#N/A
SMc01762		32.57	35.03	33.72	96.04	96.73	122.37	33.7733	105.047	1.6371	2.73e-09	1.23e-08	K	DNA-binding transcription factor activity	-	-
SMa2000		3.76	6.25	5.35	18.98	27.64	38.28	5.12	28.3	2.4666	2.75e-09	1.24e-08	G	ABC transporter substrate-binding protein	-	ko:K10439
SMb20762	phnJ	4.67	3.26	3.35	17.81	21.19	24.47	3.76	21.1567	2.4923	2.77e-09	1.25e-08	P	Catalyzes the breakage of the C-P bond in alpha-D-ribose 1-methylphosphonate 5-phosphate (PRPn) forming alpha-D-ribose	GO:0003674,GO:0003824,GO:0005488,GO:0005575,GO:0006793,GO:0008150,GO:0008152,GO:0009056,GO:0009987,GO:0016829,GO:0018835,GO:0019634,GO:0019637,GO:0019700,GO:0032991,GO:0044237,GO:0046434,GO:0048037,GO:0051536,GO:0051539,GO:0051540,GO:0071704,GO:0098848,GO:1901575,GO:1902494,GO:1904176	ko:K06163
SMa5004		15.7	10.68	11.24	4.65	5.53	5.65	12.54	5.27667	-1.2488	2.89e-09	1.3e-08	L	PFAM Integrase catalytic region	-	ko:K07497
SMa6097		11.55	13.41	12.31	3.49	7.83	4.39	12.4233	5.23667	-1.2463	2.96e-09	1.33e-08	#N/A	#N/A	#N/A	#N/A
SMb20684		13.24	15.37	16.73	48.02	58.5	58.36	15.1133	54.96	1.8626	3e-09	1.35e-08	S	protein, possibly involved in glyoxylate utilization	-	ko:K14977
SMb20875		21.93	19.66	22.88	69.7	69.55	71.54	21.49	70.2633	1.7091	3.18e-09	1.43e-08	G	deacetylase	GO:0000003,GO:0000272,GO:0003006,GO:0005575,GO:0005618,GO:0005619,GO:0005623,GO:0005631,GO:0005975,GO:0005976,GO:0006022,GO:0006026,GO:0006030,GO:0006032,GO:0006037,GO:0006039,GO:0006040,GO:0006807,GO:0007049,GO:0008150,GO:0008152,GO:0009056,GO:0009057,GO:0009272,GO:0009277,GO:0009653,GO:0009987,GO:0010383,GO:0010927,GO:0016043,GO:0016052,GO:0016998,GO:0017144,GO:0019953,GO:0022402,GO:0022411,GO:…	ko:K00365,ko:K01452
SMb21167		12.59	15.24	12.71	6.97	5.99	6.28	13.5133	6.41333	-1.0752	3.4e-09	1.52e-08	L	reverse transcriptase	-	ko:K15342
SMa2211		35.03	38.81	39.07	106.88	106.4	134.29	37.6367	115.857	1.6221	3.51e-09	1.57e-08	EH	Thiamine pyrophosphate enzyme, central domain	-	ko:K01652
SMa0789		35.03	27.35	35.99	99.91	110.09	100.41	32.79	103.47	1.6579	3.52e-09	1.57e-08	K	FCD	-	-
SMb20464		9.86	12.76	12.98	6.2	3.22	4.39	11.8667	4.60333	-1.3662	3.52e-09	1.57e-08	#N/A	#N/A	#N/A	#N/A
SMc04296	ftsZ1	87.07	85.94	74.39	218.41	220.64	224.66	82.4667	221.237	1.4237	3.73e-09	1.66e-08	D	Essential cell division protein that forms a contractile ring structure (Z ring) at the future cell division site. The regulation of the ring assembly controls the timing and the location of cell division. One of the functions of the FtsZ ring is to recruit other cell division proteins to the septum to produce a new cell wall between the dividing cells. Binds GTP and shows GTPase activity	-	ko:K03531
SMb20402		2.47	3.26	3.21	19.75	18.89	15.06	2.98	17.9	2.5866	3.78e-09	1.68e-08	C	Cytochrome C oxidase, cbb3-type, subunit III	-	-
SMc01187	rlpA	46.45	38.54	41.75	122.76	135.88	115.47	42.2467	124.703	1.5616	3.86e-09	1.72e-08	M	Lytic transglycosylase with a strong preference for naked glycan strands that lack stem peptides	-	ko:K03642
SMc00517	MA20_09410	3.89	2.73	4.15	18.98	18.89	23.22	3.59	20.3633	2.5039	3.88e-09	1.72e-08	O	XdhC CoxI family protein	-	-
SMa0522		4.02	3.78	4.15	20.52	21.19	21.34	3.98333	21.0167	2.3995	4.03e-09	1.79e-08	P	Bacterial extracellular solute-binding protein	-	-
SMb20522	MA20_07315	12.46	15.5	12.98	6.2	6.91	6.9	13.6467	6.67	-1.0328	4.23e-09	1.87e-08	S	PRC-barrel domain	-	-
SMa1191	hmp	41.52	44.8	34.66	134.76	111.93	117.35	40.3267	121.347	1.5893	4.26e-09	1.89e-08	C	Is involved in NO detoxification in an aerobic process, termed nitric oxide dioxygenase (NOD) reaction that utilizes O(2) and NAD(P)H to convert NO to nitrate, which protects the bacterium from various noxious nitrogen compounds. Therefore, plays a central role in the inducible response to nitrosative stress	-	ko:K02613,ko:K05916
SMb20285		38.41	33.34	36.8	106.11	105.94	109.82	36.1833	107.29	1.5681	4.48e-09	1.98e-08	K	transcriptional regulator	-	-
SMb21600	ampC	55.93	54.95	40.81	166.13	160.3	131.78	50.5633	152.737	1.5949	4.62e-09	2.04e-08	V	beta-lactamase	-	ko:K01467
SMc00799		20.76	25.52	21.14	74.74	80.61	65.26	22.4733	73.5367	1.7102	4.63e-09	2.04e-08	S	MgtC family	-	ko:K07507
SMa1156		67.34	63.94	63.02	175.42	169.97	184.5	64.7667	176.63	1.4474	4.69e-09	2.07e-08	C	alcohol dehydrogenase	-	-
SMc00966	MA20_18575	18.43	14.84	12.44	56.93	59.42	47.69	15.2367	54.68	1.8435	4.71e-09	2.07e-08	I	Belongs to the thiolase family	-	ko:K00626,ko:K00632
SMc04397	ALDH2C	30.1	27.48	31.44	92.55	84.75	97.9	29.6733	91.7333	1.6283	4.97e-09	2.19e-08	C	belongs to the aldehyde dehydrogenase family	GO:0001523,GO:0001654,GO:0001758,GO:0002138,GO:0003674,GO:0003824,GO:0004029,GO:0004030,GO:0005488,GO:0005515,GO:0005575,GO:0005622,GO:0005623,GO:0005634,GO:0005737,GO:0005829,GO:0005886,GO:0006081,GO:0006082,GO:0006629,GO:0006720,GO:0006721,GO:0006725,GO:0007275,GO:0007423,GO:0008150,GO:0008152,GO:0008299,GO:0008610,GO:0009058,GO:0009653,GO:0009698,GO:0009699,GO:0009790,GO:0009887,GO:0009987,GO:…	ko:K00128,ko:K00130
SMa0151	matA	2.85	2.73	2.54	18.59	17.04	14.43	2.70667	16.6867	2.6241	5.03e-09	2.21e-08	G	Malonyl-CoA decarboxylase	-	ko:K01578
SMc00764		43.86	46.36	44.96	124.31	121.6	150.61	45.06	132.173	1.5525	5.27e-09	2.32e-08	#N/A	#N/A	#N/A	#N/A
SMb21187		30.88	30.6	32.78	100.68	87.52	98.52	31.42	95.5733	1.6049	5.32e-09	2.34e-08	K	Transcriptional regulator	-	-
SMa1550		6.1	8.33	6.29	29.04	31.32	30.12	6.90667	30.16	2.1266	5.57e-09	2.44e-08	K	response regulator	-	-
SMb21091	lysM	15.18	14.84	10.84	65.83	42.38	48.32	13.62	52.1767	1.9377	5.61e-09	2.46e-08	M	Glycosyl hydrolases family 25	-	ko:K07273
SMb20724		124.83	100.66	104.63	302.83	303.09	283.02	110.04	296.313	1.4291	5.69e-09	2.49e-08	S	protein conserved in bacteria	-	ko:K07795
SMb21009	glpK	41.91	42.97	39.61	122.37	123.91	111.07	41.4967	119.117	1.5213	5.94e-09	2.6e-08	C	Key enzyme in the regulation of glycerol uptake and metabolism. Catalyzes the phosphorylation of glycerol to yield sn- glycerol 3-phosphate	GO:0003674,GO:0003824,GO:0004370,GO:0005975,GO:0006066,GO:0006071,GO:0006793,GO:0006796,GO:0008150,GO:0008152,GO:0009987,GO:0016301,GO:0016310,GO:0016740,GO:0016772,GO:0016773,GO:0019400,GO:0019751,GO:0044237,GO:0044238,GO:0044262,GO:0044281,GO:0071704,GO:1901615	ko:K00864
SMb21245		13.62	10.03	11.64	46.08	41.92	43.93	11.7633	43.9767	1.9024	5.98e-09	2.61e-08	M	SLBB domain	-	ko:K16552
SMc01654	ydcU	4.28	4.43	4.01	19.36	17.5	34.51	4.24	23.79	2.4882	6.12e-09	2.67e-08	E	spermidine putrescine	GO:0005575,GO:0005623,GO:0005886,GO:0016020,GO:0044464,GO:0071944	ko:K02054
SMc04005	pyk	141.56	142.59	134.07	343.1	355.14	365.23	139.407	354.49	1.3464	6.19e-09	2.7e-08	G	Belongs to the pyruvate kinase family	-	ko:K00873
SMc01282	msrQ	25.95	21.75	21.27	71.25	72.78	75.93	22.99	73.32	1.6732	6.21e-09	2.7e-08	C	Part of the MsrPQ system that repairs oxidized periplasmic proteins containing methionine sulfoxide residues (Met-O), using respiratory chain electrons. Thus protects these proteins from oxidative-stress damage caused by reactive species of oxygen and chlorine generated by the host defense mechanisms. MsrPQ is essential for the maintenance of envelope integrity under bleach stress, rescuing a wid…	-	ko:K17247
SMc00432	iolB	16.61	16.28	16.99	60.02	55.74	52.71	16.6267	56.1567	1.756	6.3e-09	2.74e-08	G	enzyme involved in inositol metabolism	-	ko:K03337
SMc03168	vceA	1347.91	1359.09	1184.97	3563.83	3038.72	3196.67	1297.32	3266.41	1.3322	6.35e-09	2.76e-08	V	Multidrug resistance efflux pump	GO:0006950,GO:0006974,GO:0008150,GO:0009987,GO:0033554,GO:0042221,GO:0046677,GO:0050896,GO:0051716	ko:K03543
SMc00387	tatA	56.7	59.12	56.6	171.16	147.4	161.9	57.4733	160.153	1.4785	6.67e-09	2.89e-08	E	Aminotransferase	-	ko:K00832
SMb20128		2.21	3.39	3.21	17.81	17.96	16.94	2.93667	17.57	2.5809	6.84e-09	2.96e-08	F	Amidohydrolase family	-	ko:K01485
SMc01281	msrP	46.32	48.7	47.1	126.63	129.9	151.24	47.3733	135.923	1.5206	7.7e-09	3.34e-08	S	Part of the MsrPQ system that repairs oxidized periplasmic proteins containing methionine sulfoxide residues (Met-O), using respiratory chain electrons. Thus protects these proteins from oxidative-stress damage caused by reactive species of oxygen and chlorine generated by the host defense mechanisms. MsrPQ is essential for the maintenance of envelope integrity under bleach stress, rescuing a wid…	-	ko:K07147
SMb20959	exoO	19.72	19.27	19.8	66.22	57.12	70.28	19.5967	64.54	1.7196	7.81e-09	3.38e-08	M	Succinoglycan biosynthesis protein ExoO	GO:0005575,GO:0005622,GO:0005623,GO:0005737,GO:0044424,GO:0044464	ko:K16555
SMc00270	tktB	12.33	13.28	9.63	5.03	5.99	3.77	11.7467	4.93	-1.2526	7.94e-09	3.43e-08	G	Transketolase	-	ko:K00615
SMa2303		4.15	3.26	2.68	17.43	17.96	21.96	3.36333	19.1167	2.5069	8.02e-09	3.46e-08	GK	ROK family	-	-
SMc04144		9.21	8.85	8.3	30.21	40.07	35.77	8.78667	35.35	2.0083	8.27e-09	3.57e-08	EG	Belongs to the IlvD Edd family	-	ko:K01687
SMa0621	rdxI	12.46	14.84	19.94	54.99	59.42	60.87	15.7467	58.4267	1.8916	9.08e-09	3.91e-08	P	Nitrogen fixation protein FixI	-	ko:K01533
SMa0214	kduI	13.36	10.16	10.17	4.26	3.68	6.28	11.23	4.74	-1.2444	9.36e-09	4.02e-08	G	Catalyzes the isomerization of 5-dehydro-4-deoxy-D- glucuronate to 3-deoxy-D-glycero-2,5-hexodiulosonate	-	ko:K01815
SMb20518		8.3	9.38	8.96	1.16	3.22	3.77	8.88	2.71667	-1.7087	9.42e-09	4.04e-08	S	chitinase	-	ko:K03791
SMc00296	phbC	120.54	133.73	133.13	359.75	314.14	358.32	129.133	344.07	1.4138	1e-08	4.29e-08	I	Poly-beta-hydroxybutyrate polymerase	GO:0005575,GO:0005622,GO:0005623,GO:0005737,GO:0044424,GO:0044464	ko:K03821
SMc00556	radA	48.66	48.57	42.01	125.08	144.17	126.76	46.4133	132.003	1.508	1.05e-08	4.49e-08	O	DNA-dependent ATPase involved in processing of recombination intermediates, plays a role in repairing DNA breaks. Stimulates the branch migration of RecA-mediated strand transfer reactions, allowing the 3' invading strand to extend heteroduplex DNA faster. Binds ssDNA in the presence of ADP but not other nucleotides, has ATPase activity that is stimulated by ssDNA and various branched DNA structu…	-	ko:K04485
SMc01188	dacC	16.87	14.58	12.71	54.6	57.58	43.3	14.72	51.8267	1.8159	1.07e-08	4.56e-08	M	Belongs to the peptidase S11 family	-	ko:K07258
SMc00148	MA20_21430	31.14	29.56	26.49	85.19	89.82	86.6	29.0633	87.2033	1.5852	1.17e-08	5.01e-08	S	flavin-nucleotide-binding protein structurally related to pyridoxine 5'-phosphate oxidase	-	ko:K07006
SMc02677	proC	48.53	47.66	48.04	122.76	140.49	144.96	48.0767	136.07	1.5009	1.23e-08	5.24e-08	E	Catalyzes the reduction of 1-pyrroline-5-carboxylate (PCA) to L-proline	GO:0003674,GO:0003824,GO:0004735,GO:0006082,GO:0006520,GO:0006560,GO:0006561,GO:0006807,GO:0008150,GO:0008152,GO:0008652,GO:0009058,GO:0009064,GO:0009084,GO:0009987,GO:0016053,GO:0016491,GO:0016645,GO:0016646,GO:0018130,GO:0019752,GO:0043436,GO:0044237,GO:0044238,GO:0044249,GO:0044281,GO:0044283,GO:0046394,GO:0046483,GO:0055114,GO:0071704,GO:1901360,GO:1901362,GO:1901564,GO:1901566,GO:1901576,GO:…	ko:K00286
SMc01594	glnA2	64.1	53.26	62.35	156.06	166.75	192.65	59.9033	171.82	1.5202	1.3e-08	5.53e-08	E	glutamine synthetase	-	ko:K01915
SMb21361		5.06	3.39	3.88	17.43	25.33	21.96	4.11	21.5733	2.392	1.3e-08	5.53e-08	-	-	-	-
SMb20809	kdsD	21.41	22.66	20.2	60.02	71.4	76.56	21.4233	69.3267	1.6942	1.34e-08	5.69e-08	M	Belongs to the SIS family. GutQ KpsF subfamily	-	ko:K06041
SMb20954		45.93	49.22	53.66	128.18	143.25	182.61	49.6033	151.347	1.6093	1.4e-08	5.95e-08	I	Acyltransferase family	GO:0005575,GO:0005623,GO:0005886,GO:0016020,GO:0044464,GO:0071944	ko:K16560
SMc00353	exoD	33.22	29.04	25.96	86.74	86.6	94.13	29.4067	89.1567	1.6002	1.41e-08	5.97e-08	S	ABC-type transport system, permease components	-	-
SMc00022		60.08	60.03	64.09	173.1	169.97	160.65	61.4	167.907	1.4513	1.44e-08	6.1e-08	S	Protein of unknown function (DUF721)	-	-
SMa1428	MA20_16910	14.66	16.28	12.58	53.83	44.68	53.97	14.5067	50.8267	1.8089	1.44e-08	6.1e-08	K	Bacterial regulatory proteins, tetR family	-	-
SMb20763	phnK	5.19	3.91	3.75	17.81	23.49	24.47	4.28333	21.9233	2.3557	1.5e-08	6.32e-08	P	phosphonate C-P lyase system protein PhnK	GO:0005575,GO:0006793,GO:0008150,GO:0008152,GO:0009056,GO:0009987,GO:0019634,GO:0019637,GO:0019700,GO:0032991,GO:0044237,GO:0046434,GO:0071704,GO:1901575,GO:1902494,GO:1904176	ko:K05781
SMa1325	bphK	8.95	12.37	10.04	2.32	3.22	6.9	10.4533	4.14667	-1.3339	1.5e-08	6.32e-08	O	Glutathione S-transferase, N-terminal domain	-	ko:K00799
SMb20173	mxaF	118.6	146.89	145.98	375.63	348.23	485.71	137.157	403.19	1.5556	1.55e-08	6.54e-08	G	PQQ-like domain	-	ko:K00114
SMc00414	pmtA	155.84	154.7	137.55	375.24	366.19	387.19	149.363	376.207	1.3327	1.67e-08	7.02e-08	I	Ribosomal RNA adenine dimethylase	-	ko:K00570
SMc02257	occM	8.69	9.38	8.7	35.24	35.01	33.26	8.92333	34.5033	1.9511	1.7e-08	7.14e-08	E	Binding-protein-dependent transport system inner membrane component	-	ko:K02029
SMc03135	glnQ	7.14	7.16	5.08	23.62	31.32	30.75	6.46	28.5633	2.1446	1.81e-08	7.57e-08	E	ABC transporter	-	ko:K02028,ko:K09972,ko:K10010
SMc00302		120.28	126.96	112.13	288.11	315.53	322.55	119.79	308.73	1.3658	1.83e-08	7.67e-08	S	FeS assembly SUF system protein	-	-
SMa2163	mmsR	7.79	7.68	6.29	28.27	26.72	37.65	7.25333	30.88	2.09	1.85e-08	7.73e-08	K	sequence-specific DNA binding	-	ko:K02529,ko:K02854,ko:K13652
SMc02240		21.15	25.91	21.81	71.25	72.32	73.42	22.9567	72.33	1.6557	1.85e-08	7.73e-08	S	Uncharacterised 5xTM membrane BCR, YitT family COG1284	-	-
SMa0866	nodC	21.8	17.45	16.46	70.87	51.13	68.4	18.57	63.4667	1.773	1.89e-08	7.91e-08	M	Chitin synthase	GO:0000271,GO:0003674,GO:0003824,GO:0005575,GO:0005623,GO:0005886,GO:0005887,GO:0005975,GO:0005976,GO:0006022,GO:0006023,GO:0006024,GO:0006082,GO:0006807,GO:0007155,GO:0008150,GO:0008152,GO:0008194,GO:0009058,GO:0009059,GO:0009987,GO:0016020,GO:0016021,GO:0016043,GO:0016051,GO:0016053,GO:0016740,GO:0016757,GO:0016758,GO:0019752,GO:0022607,GO:0022610,GO:0030198,GO:0030203,GO:0030212,GO:0030213,GO:…	ko:K00752,ko:K14666
SMc01465	creA	161.81	183.22	169.66	425.2	457.4	429.24	171.563	437.28	1.3498	1.95e-08	8.15e-08	S	CreA protein	GO:0005575,GO:0005622,GO:0005623,GO:0005737,GO:0005829,GO:0044424,GO:0044444,GO:0044464	ko:K05805
SMc01588	ssdA	65.66	71.88	62.89	175.42	173.19	193.91	66.81	180.84	1.4366	2e-08	8.36e-08	C	belongs to the aldehyde dehydrogenase family	-	-
SMa0150	matB	5.19	4.82	4.95	27.11	24.87	18.2	4.98667	23.3933	2.2299	2.03e-08	8.45e-08	IQ	Catalyzes the formation of malonyl-CoA from malonate and CoA	-	ko:K18661
SMc00652	chpT	22.32	17.71	19.27	68.16	53.89	78.44	19.7667	66.83	1.7574	2.03e-08	8.47e-08	S	Histidine phosphotransferase C-terminal domain	-	ko:K13588
SMb20765		3.24	2.86	4.28	15.1	22.11	20.71	3.46	19.3067	2.4803	2.3e-08	9.54e-08	S	#NAME?	-	ko:K00638
SMb20832	kpsT	6.23	5.73	5.49	22.07	27.64	28.24	5.81667	25.9833	2.1593	2.34e-08	9.68e-08	GM	ATP-binding protein	-	ko:K09689
SMc04282	cobB	16.09	13.15	16.46	50.73	52.97	52.71	15.2333	52.1367	1.7751	2.35e-08	9.75e-08	H	Catalyzes the ATP-dependent amidation of the two carboxylate groups at positions a and c of hydrogenobyrinate, using either L-glutamine or ammonia as the nitrogen source	-	ko:K02224
SMa2020		52.03	44.93	49.78	144.83	136.8	128.65	48.9133	136.76	1.4833	2.79e-08	1.15e-07	K	helix_turn_helix multiple antibiotic resistance protein	-	-
SMc04385	alh	533.69	528.69	496.68	1310.05	1177.35	1277.67	519.687	1255.02	1.272	3.11e-08	1.28e-07	C	Belongs to the aldehyde dehydrogenase family	-	ko:K00128
SMc02263	ilvB1	41.78	43.88	37.33	109.2	116.08	123.62	40.9967	116.3	1.5043	3.22e-08	1.32e-07	EH	Thiamine pyrophosphate enzyme, central domain	-	ko:K01652
SMb20482	cphA	11.29	12.11	13.65	41.44	50.21	41.42	12.35	44.3567	1.8446	3.22e-08	1.32e-07	HJK	FR47-like protein	-	-
SMc00349	lepA	270.54	198.19	187.86	643.99	595.12	571.69	218.863	603.6	1.4636	3.23e-08	1.32e-07	M	Required for accurate and efficient protein synthesis under certain stress conditions. May act as a fidelity factor of the translation reaction, by catalyzing a one-codon backward translocation of tRNAs on improperly translocated ribosomes. Back- translocation proceeds from a post-translocation (POST) complex to a pre-translocation (PRE) complex, thus giving elongation factor G a second chance to…	-	ko:K03596
SMb21243		20.76	17.58	20.47	60.41	69.55	59.62	19.6033	63.1933	1.6887	3.26e-08	1.34e-07	S	Sulfotransferase domain	-	-
SMb20944	exoQ	13.49	13.93	12.85	45.31	43.3	50.83	13.4233	46.48	1.7919	3.29e-08	1.35e-07	M	O-Antigen ligase	GO:0005575,GO:0005623,GO:0005886,GO:0016020,GO:0044464,GO:0071944	ko:K16567
SMc00175	yrbF	24.26	20.18	21.27	76.29	70.94	60.24	21.9033	69.1567	1.6587	3.34e-08	1.37e-07	Q	ABC-type transport system involved in resistance to organic solvents, ATPase component	-	ko:K02065
SMb21202	mhqO	3.89	3.13	2.54	13.94	20.73	19.45	3.18667	18.04	2.5011	3.34e-08	1.37e-07	E	dioxygenase	-	ko:K15975
SMb21377		10.64	11.2	8.96	32.53	42.84	40.79	10.2667	38.72	1.9151	3.48e-08	1.42e-07	G	Periplasmic binding protein-like domain	-	ko:K10439
SMc00174	MA20_08115	78.5	70.32	65.83	188.2	196.22	184.5	71.55	189.64	1.4062	3.51e-08	1.43e-07	Q	ABC-type transport system involved in resistance to organic solvents, permease component	-	ko:K02066
SMc01820	amaB	733.13	771.8	739.13	1740.28	1747.6	1961.05	748.02	1816.31	1.2799	3.68e-08	1.5e-07	E	the allantoate amidohydrolase from Escherichia coli forms a dimer and binds zinc ions for catalytic activity and catalyzes the conversion of allantoate to (S)-ureidoglycolate and ammonia	GO:0003674,GO:0005488,GO:0005515,GO:0042802	ko:K06016
SMb20880	rhlE	243.03	195.46	196.29	499.16	689.55	567.92	211.593	585.543	1.4685	3.93e-08	1.6e-07	L	RNA helicase	-	ko:K11927
SMc00728	etfA	100.69	99.88	88.44	238.54	244.13	262.94	96.3367	248.537	1.3673	3.97e-08	1.61e-07	C	Electron transfer flavoprotein, alpha subunit	-	ko:K03522
SMc04396		43.21	43.62	40.41	107.27	118.84	139.94	42.4133	122.017	1.5245	4.14e-08	1.68e-07	G	Extracellular solute-binding protein	-	ko:K17315
SMc02559	MA20_42120	55.02	55.73	45.63	144.83	137.73	147.47	52.1267	143.343	1.4594	4.27e-08	1.73e-07	S	hydrolases of HD superfamily	-	ko:K06952
SMc01327	rlmB	55.28	50.65	45.63	148.7	125.29	149.98	50.52	141.323	1.4841	4.36e-08	1.77e-07	J	Belongs to the class IV-like SAM-binding methyltransferase superfamily. RNA methyltransferase TrmH family	-	ko:K03218
SMc00971		75.52	82.82	80.42	222.28	220.64	192.65	79.5867	211.857	1.4125	4.49e-08	1.81e-07	S	Belongs to the pirin family	-	ko:K06911
SMb21182		31.92	32.29	31.58	85.97	96.27	96.01	31.93	92.75	1.5384	4.85e-08	1.96e-07	C	carnitine dehydratase	-	-
SMc01619		4.93	6.51	4.68	24.4	26.72	21.34	5.37333	24.1533	2.1683	4.92e-08	1.98e-07	IQ	Class II Aldolase and Adducin N-terminal domain	-	-
SMb21006		5.84	10.16	10.44	2.32	2.76	3.14	8.81333	2.74	-1.6855	5.08e-08	2.05e-07	-	-	-	-
SMc01831	ureF	29.71	32.16	26.63	93.33	84.29	83.46	29.5	87.0267	1.5607	5.09e-08	2.05e-07	O	Required for maturation of urease via the functional incorporation of the urease nickel metallocenter	-	ko:K03188
SMc04402		28.03	25.65	26.76	79.39	81.99	77.19	26.8133	79.5233	1.5684	5.3e-08	2.13e-07	EM	Protein of unknown function (DUF993)	-	-
SMc01332		60.21	61.33	59.28	166.9	173.65	146.22	60.2733	162.257	1.4287	5.38e-08	2.16e-07	-	-	-	-
SMc01410		81.49	85.42	89.11	232.35	208.66	235.95	85.34	225.653	1.4028	5.69e-08	2.28e-07	I	Outer membrane lipoprotein	-	ko:K06077
SMc02682	MA20_05390	22.58	15.63	12.44	64.67	54.81	59.62	16.8833	59.7	1.8221	5.73e-08	2.3e-07	S	Putative S-adenosyl-L-methionine-dependent methyltransferase	-	ko:K00574,ko:K18164
SMc00801		9.34	8.2	7.09	33.3	35.93	26.98	8.21	32.07	1.9658	5.92e-08	2.37e-07	-	-	-	-
SMc01975		11.29	15.37	14.99	45.31	47.9	53.34	13.8833	48.85	1.815	6.19e-08	2.47e-07	K	FCD	-	-
SMc02047	gcvT	165.57	157.69	120.02	437.59	370.8	387.82	147.76	398.737	1.4322	6.22e-08	2.48e-07	E	Glycine cleavage system T protein	GO:0001505,GO:0003674,GO:0003824,GO:0004047,GO:0005575,GO:0005622,GO:0005623,GO:0005737,GO:0005960,GO:0006082,GO:0006520,GO:0006544,GO:0006546,GO:0006807,GO:0008150,GO:0008152,GO:0008168,GO:0008483,GO:0009056,GO:0009063,GO:0009069,GO:0009071,GO:0009987,GO:0016054,GO:0016740,GO:0016741,GO:0016769,GO:0017144,GO:0019464,GO:0019752,GO:0032259,GO:0032991,GO:0042133,GO:0042135,GO:0042737,GO:0043436,GO:…	ko:K00605
SMc02544	yvdD	34.52	29.43	27.3	96.42	87.52	84.72	30.4167	89.5533	1.5579	6.45e-08	2.57e-07	S	Belongs to the LOG family	-	ko:K06966
SMb21266	redA	14.4	13.8	11.64	41.44	54.81	42.67	13.28	46.3067	1.802	6.53e-08	2.6e-07	S	glycosyl transferase	-	-
SMa0953		4.15	4.17	4.15	22.85	17.5	20.08	4.15667	20.1433	2.2768	6.56e-08	2.61e-07	E	Part of the ABC transporter complex PotABCD involved in spermidine putrescine import. Responsible for energy coupling to the transport system	-	ko:K02052,ko:K11080
SMb21498		22.06	21.49	22.35	80.93	70.48	56.48	21.9667	69.2967	1.6575	7.04e-08	2.8e-07	V	efflux pump	-	-
SMb21192		64.88	59.25	62.49	171.94	162.6	160.65	62.2067	165.063	1.4079	7.42e-08	2.94e-07	G	catalyzes the reversible aldol condensation of dihydroxyacetonephosphate and glyceraldehyde 3-phosphate in the Calvin cycle, glycolysis and gluconeogenesis	-	ko:K01624
SMc01952	cysQ	28.55	19.66	18.2	73.58	69.09	73.42	22.1367	72.03	1.7022	7.72e-08	3.05e-07	P	3'(2'),5'-bisphosphate nucleotidase	-	ko:K01082
SMa0800		12.2	7.29	8.83	36.01	41.46	32.63	9.44	36.7	1.9589	7.88e-08	3.11e-07	E	Binding-protein-dependent transport system inner membrane component	-	ko:K02054
SMc00073		28.29	35.29	34.39	88.68	103.64	100.41	32.6567	97.5767	1.5792	7.95e-08	3.14e-07	CO	to be involved in C-type cytochrome biogenesis	-	-
SMc02510	fur	6.1	7.03	5.35	25.17	24.41	28.87	6.16	26.15	2.0858	7.99e-08	3.15e-07	K	Belongs to the Fur family	-	ko:K03711
SMc02174		27.77	21.23	23.28	72.42	70.01	80.95	24.0933	74.46	1.6278	8.09e-08	3.19e-07	S	membrane	GO:0005575,GO:0005623,GO:0005886,GO:0016020,GO:0044464,GO:0071944	ko:K15977
SMc03837	ybbA	162.84	170.98	155.35	384.54	407.19	411.66	163.057	401.13	1.2987	8.57e-08	3.37e-07	Q	ABC transporter	GO:0000166,GO:0003674,GO:0005488,GO:0005524,GO:0008144,GO:0017076,GO:0030554,GO:0032553,GO:0032555,GO:0032559,GO:0035639,GO:0036094,GO:0043167,GO:0043168,GO:0097159,GO:0097367,GO:1901265,GO:1901363	ko:K02003
SMa1529	nuoD2	13.75	17.45	16.06	57.7	44.22	58.99	15.7533	53.6367	1.7676	8.6e-08	3.38e-07	C	NDH-1 shuttles electrons from NADH, via FMN and iron- sulfur (Fe-S) centers, to quinones in the respiratory chain. The immediate electron acceptor for the enzyme in this species is believed to be ubiquinone. Couples the redox reaction to proton translocation (for every two electrons transferred, four hydrogen ions are translocated across the cytoplasmic membrane), and thus conserves the redox ene…	-	ko:K00333
SMc00081		35.29	33.6	34.92	95.65	105.02	94.13	34.6033	98.2667	1.5058	8.67e-08	3.41e-07	S	Hydrolase	-	ko:K01560,ko:K07025
SMc00532	sufD	1551.24	1683.98	1528.31	3925.52	3761.9	3625.28	1587.84	3770.9	1.2478	8.93e-08	3.5e-07	O	ABC-type transport system involved in Fe-S cluster assembly, permease component	-	ko:K09015
SMc00554	purF	524.74	492.49	452.52	1229.51	1093.52	1259.47	489.917	1194.17	1.2854	9.03e-08	3.54e-07	F	Catalyzes the formation of phosphoribosylamine from phosphoribosylpyrophosphate (PRPP) and glutamine	GO:0005575,GO:0005622,GO:0005623,GO:0005737,GO:0009507,GO:0009536,GO:0043226,GO:0043227,GO:0043229,GO:0043231,GO:0044424,GO:0044444,GO:0044464	ko:K00764
SMa0952		1.56	1.04	0.8	7.74	9.67	13.81	1.13333	10.4067	3.1989	9.07e-08	3.55e-07	E	Binding-protein-dependent transport system inner membrane component	-	ko:K11079
SMc01264		23.1	23.05	21.68	67.38	67.25	70.28	22.61	68.3033	1.595	9.22e-08	3.61e-07	-	-	-	-
SMc04226		16.87	13.41	14.85	49.95	47.9	52.09	15.0433	49.98	1.7322	9.37e-08	3.66e-07	S	Kazal type serine protease inhibitors	-	-
SMa1400		1.43	1.04	0.94	7.36	11.98	11.3	1.13667	10.2133	3.1676	9.42e-08	3.68e-07	I	Acyl-CoA dehydrogenase, C-terminal domain	-	-
SMb20874		4.67	4.17	4.82	21.69	22.57	18.83	4.55333	21.03	2.2075	9.52e-08	3.71e-07	S	OHCU decarboxylase	-	-
SMc00183		4.93	8.72	6.69	25.56	24.41	45.81	6.78	31.9267	2.2354	9.58e-08	3.74e-07	S	NADPH-dependent FMN reductase	-	-
SMb20205	pqqB	7.79	10.29	8.83	27.49	39.15	38.91	8.97	35.1833	1.9717	9.86e-08	3.84e-07	S	May be involved in the transport of PQQ or its precursor to the periplasm	-	ko:K06136
SMb22003		9.73	11.98	10.84	5.03	4.61	6.28	10.85	5.30667	-1.0318	1.03e-07	4e-07	L	transposition	-	-
SMc04081	sqdD	11.03	12.76	12.04	36.4	41.92	49.58	11.9433	42.6333	1.8358	1.05e-07	4.06e-07	M	glycosyl transferase	-	-
SMc02068	fbpC	37.37	41.54	35.19	103.39	105.02	112.33	38.0333	106.913	1.4911	1.07e-07	4.13e-07	P	Belongs to the ABC transporter superfamily	-	ko:K02010
SMc02101	rpsB	776.85	602.91	566.12	1913.38	1703.38	1548.76	648.627	1721.84	1.4085	1.13e-07	4.38e-07	J	Belongs to the universal ribosomal protein uS2 family	GO:0003674,GO:0003735,GO:0005198,GO:0005575,GO:0005622,GO:0005623,GO:0005737,GO:0005829,GO:0005840,GO:0006412,GO:0006518,GO:0006807,GO:0008150,GO:0008152,GO:0009058,GO:0009059,GO:0009987,GO:0010467,GO:0015935,GO:0019538,GO:0022626,GO:0022627,GO:0032991,GO:0034641,GO:0034645,GO:0043043,GO:0043170,GO:0043226,GO:0043228,GO:0043229,GO:0043232,GO:0043603,GO:0043604,GO:0044237,GO:0044238,GO:0044249,GO:…	ko:K02967
SMc02147	phoR	23.36	30.47	24.75	80.16	81.53	75.93	26.1933	79.2067	1.5964	1.16e-07	4.5e-07	T	Histidine kinase	-	ko:K07636
SMc04400	afr	18.81	16.15	16.06	50.73	48.37	79.7	17.0067	59.6	1.8092	1.2e-07	4.63e-07	S	Oxidoreductase family, C-terminal alpha/beta domain	-	ko:K19181
SMb21188		7.14	8.07	6.56	28.66	25.79	32.63	7.25667	29.0267	2	1.2e-07	4.64e-07	I	Acyltransferase family	-	-
SMb21382		8.43	8.59	8.03	4.65	2.76	0	8.35	2.47	-1.7573	1.22e-07	4.72e-07	-	-	-	-
SMc01717	merA	14.66	15.5	13.51	52.28	50.67	41.42	14.5567	48.1233	1.7251	1.26e-07	4.83e-07	C	Belongs to the class-I pyridine nucleotide-disulfide oxidoreductase family	-	-
SMc00701	cobT	345.02	313.44	324.47	801.99	795.95	759.32	327.643	785.753	1.262	1.29e-07	4.95e-07	H	Cobalamin biosynthesis protein CobT	-	ko:K09883
SMc01626		6.49	7.16	7.49	29.82	25.79	28.87	7.04667	28.16	1.9986	1.31e-07	5.05e-07	G	Binding-protein-dependent transport system inner membrane component	-	ko:K02026
SMc03995	enhC	65.27	56.78	53.92	164.58	154.77	149.98	58.6567	156.443	1.4153	1.4e-07	5.36e-07	S	FOG TPR repeat, SEL1 subfamily	-	ko:K07126
SMc00086	cycG	46.06	48.57	46.56	130.89	141.41	114.84	47.0633	129.047	1.4552	1.4e-07	5.36e-07	C	Cytochrome c, mono- and diheme variants	GO:0005575,GO:0005623,GO:0005886,GO:0016020,GO:0044464,GO:0071944	-
SMc01575		128.59	117.07	109.85	316.77	277.29	306.87	118.503	300.31	1.3415	1.41e-07	5.4e-07	M	ErfK YbiS YcfS YnhG family protein	-	-
SMc02082	tolC	232.52	199.88	151.33	544.08	497.47	540.31	194.577	527.287	1.4382	1.42e-07	5.44e-07	MU	Outer membrane efflux protein	-	ko:K12340,ko:K12543
SMc00243	MA20_34820	19.46	17.58	15.79	48.02	59.42	64.64	17.61	57.36	1.7037	1.46e-07	5.56e-07	S	Belongs to the binding-protein-dependent transport system permease family	-	ko:K02057
SMc01242		40.09	31.25	31.31	99.14	100.42	96.01	34.2167	98.5233	1.5258	1.47e-07	5.6e-07	S	protein conserved in bacteria	-	ko:K09796
SMc00806	MA20_15015	7.92	9.9	10.44	39.11	31.32	35.14	9.42	35.19	1.9014	1.59e-07	6.07e-07	T	Protein of unknown function (DUF1236)	-	-
SMc00965	yhfT	38.15	30.08	32.11	106.49	94.89	89.11	33.4467	96.83	1.5336	1.67e-07	6.35e-07	IQ	AMP-binding enzyme C-terminal domain	-	ko:K01897
SMa1532		6.62	6.12	5.75	30.59	25.33	20.71	6.16333	25.5433	2.0512	1.67e-07	6.37e-07	C	NDH-1 shuttles electrons from NADH, via FMN and iron- sulfur (Fe-S) centers, to quinones in the respiratory chain. The immediate electron acceptor for the enzyme in this species is believed to be ubiquinone. Couples the redox reaction to proton translocation (for every two electrons transferred, four hydrogen ions are translocated across the cytoplasmic membrane), and thus conserves the redox ene…	-	ko:K00331
SMb20906		11.03	8.2	9.1	2.71	4.15	5.65	9.44333	4.17	-1.1792	1.71e-07	6.51e-07	#N/A	#N/A	#N/A	#N/A
SMc01651		9.86	5.99	7.36	31.37	30.4	30.12	7.73667	30.63	1.9852	1.78e-07	6.74e-07	K	transcriptional regulator	-	-
SMc01516		22.97	21.75	19.27	58.47	62.64	80.32	21.33	67.1433	1.6544	1.78e-07	6.74e-07	M	Uncharacterized protein conserved in bacteria (DUF2325)	-	-
SMc02060	nlpD	51.9	42.84	39.2	113.46	136.8	127.39	44.6467	125.883	1.4955	1.84e-07	6.95e-07	DM	Lysin motif	-	ko:K06194
SMc03876	hslR	16.74	15.11	15.66	44.15	56.66	54.6	15.8367	51.8033	1.7098	1.93e-07	7.31e-07	J	Ribosome-associated heat shock protein implicated in the recycling of the 50S subunit	-	ko:K04762
SMb20893	gguB	18.3	19.79	20.07	54.99	65.41	60.87	19.3867	60.4233	1.64	2.01e-07	7.57e-07	G	Belongs to the binding-protein-dependent transport system permease family	GO:0005575,GO:0005623,GO:0005886,GO:0005975,GO:0005996,GO:0008150,GO:0008152,GO:0016020,GO:0016021,GO:0019321,GO:0031224,GO:0042732,GO:0044238,GO:0044281,GO:0044425,GO:0044464,GO:0071704,GO:0071944	ko:K10547
SMc02560	chvI	98.49	93.63	91.25	217.25	245.97	266.08	94.4567	243.1	1.3638	2.06e-07	7.77e-07	T	Response regulators consisting of a CheY-like receiver domain and a winged-helix DNA-binding domain	GO:0000976,GO:0001067,GO:0001130,GO:0001216,GO:0003674,GO:0003676,GO:0003677,GO:0003690,GO:0003700,GO:0005488,GO:0005575,GO:0006355,GO:0008150,GO:0009889,GO:0009891,GO:0009893,GO:0010468,GO:0010556,GO:0010557,GO:0010604,GO:0010628,GO:0019219,GO:0019222,GO:0031323,GO:0031325,GO:0031326,GO:0031328,GO:0032991,GO:0032993,GO:0043565,GO:0044212,GO:0045893,GO:0045935,GO:0048518,GO:0048522,GO:0050789,GO:…	ko:K14981
SMa0062		4.41	6.51	4.68	20.91	29.02	20.08	5.2	23.3367	2.166	2.11e-07	7.95e-07	K	FCD	-	-
SMa0105		3.76	3.52	2.14	16.65	15.66	17.57	3.14	16.6267	2.4047	2.14e-07	8.06e-07	EP	Binding-protein-dependent transport system inner membrane component	-	ko:K02033
SMb20537	purR	2.6	4.04	3.61	19.36	21.19	12.55	3.41667	17.7	2.3731	2.16e-07	8.14e-07	K	Bacterial regulatory proteins, lacI family	-	-
SMc02141	phoU	34.65	35.68	31.18	96.04	90.74	97.27	33.8367	94.6833	1.4845	2.33e-07	8.76e-07	P	Plays a role in the regulation of phosphate uptake	GO:0003674,GO:0005488,GO:0005515,GO:0005575,GO:0005622,GO:0005623,GO:0005737,GO:0008150,GO:0009892,GO:0010563,GO:0010966,GO:0019220,GO:0019222,GO:0031323,GO:0031324,GO:0032879,GO:0034762,GO:0034763,GO:0034765,GO:0034766,GO:0042802,GO:0042803,GO:0043269,GO:0043271,GO:0044070,GO:0044424,GO:0044464,GO:0045936,GO:0046983,GO:0048519,GO:0048523,GO:0050789,GO:0050794,GO:0051049,GO:0051051,GO:0051174,GO:…	ko:K02039
SMa1331		4.67	8.59	5.62	0.77	0.92	0.63	6.29333	0.773333	-3.0247	2.52e-07	9.42e-07	G	Cupin	-	-
SMc00881	dgoK	75.52	97.01	90.99	245.9	230.77	229.05	87.84	235.24	1.4212	2.53e-07	9.45e-07	G	2-dehydro-3-deoxygalactonokinase	GO:0003674,GO:0003824,GO:0005975,GO:0006082,GO:0006793,GO:0006796,GO:0008150,GO:0008152,GO:0008671,GO:0009056,GO:0009987,GO:0016052,GO:0016054,GO:0016301,GO:0016310,GO:0016740,GO:0016772,GO:0016773,GO:0019200,GO:0019520,GO:0019583,GO:0019584,GO:0019752,GO:0032787,GO:0034192,GO:0034194,GO:0043436,GO:0044237,GO:0044238,GO:0044248,GO:0044262,GO:0044275,GO:0044281,GO:0044282,GO:0046176,GO:0046395,GO:…	ko:K00883
SMa0163	cpaC	6.23	7.42	6.15	29.43	27.18	22.59	6.6	26.4	2	2.54e-07	9.5e-07	U	Bacterial type II and III secretion system protein	-	ko:K02280
SMc01698		19.46	16.28	16.06	54.6	50.21	59.62	17.2667	54.81	1.6664	2.56e-07	9.56e-07	IQ	Dehydrogenases with different specificities (related to short-chain alcohol dehydrogenases)	-	-
SMc04236		133.52	131.52	98.48	334.97	335.79	290.55	121.173	320.437	1.403	2.57e-07	9.59e-07	O	unfolded protein binding	-	ko:K18481
SMb20767		33.48	28.65	25.82	80.55	83.37	91.62	29.3167	85.18	1.5388	2.78e-07	1.04e-06	G	Dak2	-	ko:K00863
SMc03926	glgX	43.08	42.71	37.6	112.3	117	106.05	41.13	111.783	1.4424	2.79e-07	1.04e-06	G	Belongs to the glycosyl hydrolase 13 family	-	ko:K02438
SMa1493		7.92	10.03	7.76	28.66	31.32	37.65	8.57	32.5433	1.925	2.8e-07	1.04e-06	K	Transcriptional regulator	-	-
SMb20115	MA20_39205	6.36	6.9	7.89	18.59	34.55	40.16	7.05	31.1	2.1412	3.13e-07	1.16e-06	EG	Belongs to the IlvD Edd family	-	ko:K01687,ko:K22186
SMa0113		53.46	46.62	44.96	139.02	129.9	121.11	48.3467	130.01	1.4271	3.23e-07	1.2e-06	T	HWE histidine kinase	-	-
SMa1533	nuoA2	15.44	17.19	19	54.99	52.05	57.11	17.21	54.7167	1.6687	3.33e-07	1.23e-06	C	NDH-1 shuttles electrons from NADH, via FMN and iron- sulfur (Fe-S) centers, to quinones in the respiratory chain. The immediate electron acceptor for the enzyme in this species is believed to be ubiquinone. Couples the redox reaction to proton translocation (for every two electrons transferred, four hydrogen ions are translocated across the cytoplasmic membrane), and thus conserves the redox ene…	-	ko:K00330
SMc03203	bkdB	44.38	50.92	52.18	128.95	140.03	132.41	49.16	133.797	1.4445	3.62e-07	1.34e-06	C	Dihydrolipoamide acetyltransferase component of pyruvate dehydrogenase complex	-	ko:K09699
SMb20682	iclR	12.46	10.81	8.96	36.79	43.3	33.26	10.7433	37.7833	1.8143	3.65e-07	1.35e-06	K	helix_turn_helix isocitrate lyase regulation	-	ko:K13641,ko:K19333
SMb20127		3.76	3.78	4.95	15.88	27.18	17.57	4.16333	20.21	2.2793	3.67e-07	1.35e-06	S	ABC-type transport system, periplasmic component surface lipoprotein	-	ko:K02058
SMc02100	tsf	163.75	130.35	118.28	407	348.69	338.24	137.46	364.643	1.4075	3.73e-07	1.37e-06	J	Associates with the EF-Tu.GDP complex and induces the exchange of GDP to GTP. It remains bound to the aminoacyl-tRNA.EF- Tu.GTP complex up to the GTP hydrolysis stage on the ribosome	GO:0003674,GO:0003676,GO:0003723,GO:0003746,GO:0005488,GO:0006412,GO:0006414,GO:0006518,GO:0006807,GO:0008135,GO:0008150,GO:0008152,GO:0009058,GO:0009059,GO:0009987,GO:0010467,GO:0019538,GO:0034641,GO:0034645,GO:0043043,GO:0043170,GO:0043603,GO:0043604,GO:0044237,GO:0044238,GO:0044249,GO:0044260,GO:0044267,GO:0044271,GO:0071704,GO:0097159,GO:1901363,GO:1901564,GO:1901566,GO:1901576	ko:K02357
SMb20701		7.66	12.76	10.04	4.65	6.45	1.88	10.1533	4.32667	-1.2306	3.87e-07	1.42e-06	GM	NmrA-like family	-	-
SMc03853	ispZ	73.57	62.9	59.28	182.39	160.76	171.32	65.25	171.49	1.3941	3.97e-07	1.46e-06	D	probably involved in intracellular septation	-	ko:K06190
SMc02561		17.91	15.5	15.79	43.76	51.59	69.03	16.4	54.7933	1.7403	3.98e-07	1.46e-06	S	protein tyrosine phosphatase	-	-
SMc05012		8.69	7.16	7.89	1.55	5.07	1.88	7.91333	2.83333	-1.4818	4.03e-07	1.48e-06	L	transposition	-	ko:K07497
SMc00415	dnaN	151.43	137.9	125.11	353.17	323.82	346.4	138.147	341.13	1.3041	4.12e-07	1.51e-06	L	Confers DNA tethering and processivity to DNA polymerases and other proteins. Acts as a clamp, forming a ring around DNA (a reaction catalyzed by the clamp-loading complex) which diffuses in an ATP-independent manner freely and bidirectionally along dsDNA. Initially characterized for its ability to contact the catalytic subunit of DNA polymerase III (Pol III), a complex, multichain enzyme respons…	-	ko:K02338
SMa1188	nosX	18.3	22.27	17.93	70.87	47.44	72.17	19.5	63.4933	1.7031	4.18e-07	1.53e-06	H	Flavin transferase that catalyzes the transfer of the FMN moiety of FAD and its covalent binding to the hydroxyl group of a threonine residue in a target flavoprotein	-	ko:K03734
SMb20574	treY	7.53	7.81	10.44	34.46	30.86	31.38	8.59333	32.2333	1.9073	4.24e-07	1.55e-06	G	Alpha amylase, catalytic domain	-	ko:K06044
SMc02880	nagK	25.69	32.16	28.63	87.9	81.53	80.95	28.8267	83.46	1.5337	4.24e-07	1.55e-06	GK	ROK family	-	ko:K00884,ko:K00885
SMc01547		31.27	30.47	28.9	93.71	73.24	94.76	30.2133	87.2367	1.5297	4.3e-07	1.57e-06	-	-	-	-
SMc01871	ddl	34.65	35.03	32.78	85.19	92.12	120.49	34.1533	99.2667	1.5393	4.61e-07	1.68e-06	M	Belongs to the D-alanine--D-alanine ligase family	-	ko:K00075,ko:K01921
SMc03801	trxA2	184.9	199.23	151.6	441.46	430.68	475.05	178.577	449.063	1.3304	4.65e-07	1.69e-06	O	Thioredoxin	-	ko:K03671,ko:K05838
SMb20667		7.53	10.03	7.23	31.75	29.94	30.75	8.26333	30.8133	1.8988	4.87e-07	1.77e-06	K	helix_turn _helix lactose operon repressor	-	ko:K06145
SMc02620		31.66	28.26	27.16	88.68	73.7	87.23	29.0267	83.2033	1.5193	4.88e-07	1.77e-06	K	Cro/C1-type HTH DNA-binding domain	-	-
SMc02275	pncA	62.93	57.04	53.66	171.55	130.36	172.57	57.8767	158.16	1.4503	4.92e-07	1.78e-06	Q	Isochorismatase family	-	ko:K08281
SMc02824	MA20_18455	6.23	7.68	4.82	27.49	22.57	26.36	6.24333	25.4733	2.0286	4.99e-07	1.8e-06	U	COG0457 FOG TPR repeat	-	-
SMa0155		0.78	0.91	1.2	7.74	11.52	6.9	0.963333	8.72	3.1782	5.07e-07	1.83e-06	G	Tripartite ATP-independent periplasmic transporters, DctQ component	-	-
SMc01125	mutS	34	26.3	28.23	83.65	83.83	86.6	29.51	84.6933	1.521	5.16e-07	1.86e-06	L	that it carries out the mismatch recognition step. This protein has a weak ATPase activity	GO:0003674,GO:0003676,GO:0003677,GO:0003684,GO:0003690,GO:0003824,GO:0005488,GO:0005575,GO:0005622,GO:0005623,GO:0006139,GO:0006259,GO:0006281,GO:0006298,GO:0006725,GO:0006807,GO:0006950,GO:0006974,GO:0008094,GO:0008150,GO:0008152,GO:0009987,GO:0016462,GO:0016787,GO:0016817,GO:0016818,GO:0016887,GO:0017111,GO:0030983,GO:0032300,GO:0032991,GO:0033554,GO:0034641,GO:0042623,GO:0043170,GO:0044237,GO:…	ko:K03555
SMa1185	nosY	16.09	19.66	18.33	74.35	42.84	65.26	18.0267	60.8167	1.7543	5.26e-07	1.89e-06	S	ABC-2 family transporter protein	-	ko:K01992,ko:K19341
SMc01236	MA20_09500	63.71	57.17	49.51	149.09	148.32	151.24	56.7967	149.55	1.3967	5.34e-07	1.92e-06	S	Protein of unknown function DUF72	-	-
SMb20146	pdxA	6.75	5.47	5.49	20.14	26.72	26.36	5.90333	24.4067	2.0477	5.36e-07	1.93e-06	H	Belongs to the PdxA family	-	ko:K00097,ko:K22024
SMc02698	apt	24.78	22.92	22.88	63.51	69.55	74.05	23.5267	69.0367	1.5531	5.55e-07	1.99e-06	F	Catalyzes a salvage reaction resulting in the formation of AMP, that is energically less costly than de novo synthesis	-	ko:K00759
SMc03209		8.17	6.9	5.75	22.07	34.55	26.98	6.94	27.8667	2.0055	5.75e-07	2.06e-06	K	helix_turn_helix multiple antibiotic resistance protein	-	-
SMc04327		30.62	32.81	27.43	87.52	76.46	96.01	30.2867	86.6633	1.5167	5.77e-07	2.07e-06	S	YheO-like PAS domain	-	ko:K21829
SMc00514	MA20_04755	37.37	41.28	32.11	103.39	101.8	100.41	36.92	101.867	1.4642	5.83e-07	2.09e-06	S	Flavin reductase like domain	-	ko:K00484,ko:K09024,ko:K13786
SMb21158		21.54	18.49	20.34	65.44	62.64	53.97	20.1233	60.6833	1.5924	5.9e-07	2.11e-06	K	Helix-turn-helix domain, rpiR family	-	-
SMc02354		18.56	20.7	16.73	60.02	52.51	58.99	18.6633	57.1733	1.6151	5.94e-07	2.12e-06	E	N-formylglutamate amidohydrolase	-	-
SMc02619		5.32	4.17	3.48	21.3	18.89	18.2	4.32333	19.4633	2.1705	6.03e-07	2.15e-06	-	-	-	-
SMc00351		10.25	9.9	8.16	30.98	40.53	30.12	9.43667	33.8767	1.8439	6.1e-07	2.17e-06	K	Cro/C1-type HTH DNA-binding domain	-	-
SMc02117	metC	34.77	36.72	33.18	90.23	99.03	97.9	34.89	95.72	1.456	6.6e-07	2.35e-06	E	cystathionine beta-lyase	GO:0000096,GO:0000098,GO:0000724,GO:0000725,GO:0003674,GO:0003824,GO:0004121,GO:0006082,GO:0006090,GO:0006139,GO:0006259,GO:0006281,GO:0006302,GO:0006310,GO:0006520,GO:0006534,GO:0006725,GO:0006790,GO:0006807,GO:0006950,GO:0006974,GO:0008150,GO:0008152,GO:0009056,GO:0009063,GO:0009069,GO:0009071,GO:0009093,GO:0009987,GO:0016054,GO:0016829,GO:0016846,GO:0019448,GO:0019450,GO:0019752,GO:0032787,GO:…	ko:K01760
SMc01617		4.02	3.65	2.68	15.88	17.04	17.57	3.45	16.83	2.2864	6.71e-07	2.38e-06	G	Haloacid dehalogenase-like hydrolase	-	-
SMc02306	MA20_21100	70.85	71.88	70.11	191.3	176.42	171.95	70.9467	179.89	1.3423	6.99e-07	2.48e-06	S	Protein of unknown function (DUF2948)	-	-
SMb21288	xdhC	12.33	13.54	12.85	46.08	37.77	43.3	12.9067	42.3833	1.7154	7.13e-07	2.52e-06	O	Xanthine and CO dehydrogenases maturation factor, XdhC CoxF family	-	ko:K07402
SMb21293	guaD1	58.39	55.86	59.68	158	145.56	147.47	57.9767	150.343	1.3747	7.19e-07	2.55e-06	F	Amidohydrolase family	-	ko:K01487
SMc00904	rluB	231.75	212.39	181.57	545.24	551.83	465.63	208.57	520.9	1.3205	7.4e-07	2.62e-06	J	Belongs to the pseudouridine synthase RsuA family	-	ko:K06178
SMa0956	atrB	10.25	10.29	8.83	35.63	34.09	32	9.79	33.9067	1.7922	7.69e-07	2.72e-06	H	Belongs to the class-III pyridoxal-phosphate-dependent aminotransferase family	-	ko:K01845
SMa1846	ttuC	3.11	2.47	2.14	17.04	12.44	12.55	2.57333	14.01	2.4447	7.91e-07	2.79e-06	CE	Tartrate dehydrogenase	-	ko:K07246
SMc00505		13.49	13.54	14.45	49.57	42.38	41.42	13.8267	44.4567	1.6849	8.45e-07	2.98e-06	S	Alpha beta hydrolase	-	ko:K07002
SMc02181	putA	659.55	672.45	617.5	1458.76	1591.91	1455.89	649.833	1502.19	1.2089	8.48e-07	2.99e-06	CE	Oxidizes proline to glutamate for use as a carbon and nitrogen source	-	ko:K13821
SMc02475		146.5	160.04	118.15	371.76	373.1	335.73	141.563	360.197	1.3473	8.64e-07	3.04e-06	M	Protease inhibitor Inh	-	-
SMb20241		4.54	4.69	4.68	18.98	19.81	21.34	4.63667	20.0433	2.112	9.03e-07	3.18e-06	S	Glycosyl transferases group 1	-	-
SMa2367		4.67	3.52	4.42	20.14	16.58	20.08	4.20333	18.9333	2.1713	9.12e-07	3.21e-06	S	Belongs to the binding-protein-dependent transport system permease family	-	ko:K02057
SMc01965		30.49	34.9	32.51	87.52	87.52	97.27	32.6333	90.77	1.4759	9.6e-07	3.37e-06	E	Part of the ABC transporter complex potABCD involved in spermidine putrescine import. Responsible for energy coupling to the transport system	-	ko:K02052
SMc04254		3.11	1.3	2.14	13.17	9.21	18.83	2.18333	13.7367	2.6534	9.77e-07	3.43e-06	G	Sugar phosphate isomerases epimerases	-	-
SMc00493	purQ	178.93	177.75	158.96	418.23	388.3	427.35	171.88	411.293	1.2588	9.8e-07	3.44e-06	F	Part of the phosphoribosylformylglycinamidine synthase complex involved in the purines biosynthetic pathway. Catalyzes the ATP-dependent conversion of formylglycinamide ribonucleotide (FGAR) and glutamine to yield formylglycinamidine ribonucleotide (FGAM) and glutamate. The FGAM synthase complex is composed of three subunits. PurQ produces an ammonia molecule by converting glutamine to glutamate.…	GO:0005575,GO:0005622,GO:0005623,GO:0005737,GO:0044424,GO:0044464	ko:K01952
SMa2327	kdpD	19.98	25.13	19.67	68.93	62.18	62.13	21.5933	64.4133	1.5768	1e-06	3.51e-06	T	Histidine kinase	-	ko:K07646
SMc01560		20.5	19.53	21.01	57.31	62.18	61.5	20.3467	60.33	1.5681	1.01e-06	3.54e-06	S	Protein of unknown function (DUF1428)	-	-
SMb20025		39.32	31.38	34.66	85.19	121.14	98.52	35.12	101.617	1.5328	1.03e-06	3.62e-06	S	protein conserved in bacteria	-	-
SMc02563		12.33	9.51	7.36	37.95	33.63	32.63	9.73333	34.7367	1.8355	1.04e-06	3.62e-06	J	RF-1 domain	-	ko:K15034
SMc02595	metB	32.83	28.78	25.82	85.19	82.91	77.19	29.1433	81.7633	1.4883	1.09e-06	3.81e-06	E	methionine gamma-lyase	-	ko:K01739
SMb21408		7.01	13.67	10.84	5.03	6.91	2.51	10.5067	4.81667	-1.1252	1.13e-06	3.95e-06	K	DNA-binding transcription factor activity	-	ko:K19735
SMb21572		48.79	48.18	42.01	109.59	193.92	121.74	46.3267	141.75	1.6134	1.14e-06	3.98e-06	E	ABC transporter substrate-binding protein	-	ko:K02002
SMc00246	qor	21.67	18.62	18.87	61.18	49.75	70.91	19.72	60.6133	1.62	1.15e-06	4.02e-06	C	NADPH quinone reductase	GO:0003674,GO:0003676,GO:0003723,GO:0003824,GO:0003960,GO:0005488,GO:0005575,GO:0005622,GO:0005623,GO:0005737,GO:0005829,GO:0006950,GO:0006979,GO:0008150,GO:0008152,GO:0009987,GO:0016491,GO:0016651,GO:0016655,GO:0017091,GO:0033554,GO:0034599,GO:0042221,GO:0044424,GO:0044444,GO:0044464,GO:0050896,GO:0051716,GO:0055114,GO:0070887,GO:0097159,GO:1901363	ko:K00344
SMc03877	mgpS	738.58	668.54	580.71	1617.14	1532.49	1555.04	662.61	1568.22	1.2429	1.16e-06	4.05e-06	L	Superfamily II DNA and RNA helicases	-	ko:K17675
SMc02635	recO	42.17	42.71	39.07	101.85	114.69	113.58	41.3167	110.04	1.4132	1.18e-06	4.09e-06	L	Involved in DNA repair and RecF pathway recombination	-	ko:K03584
SMc03092		4.41	3.91	3.61	15.49	17.5	21.96	3.97667	18.3167	2.2035	1.21e-06	4.22e-06	K	Transcriptional	-	-
SMc03253		6.1	6.64	5.62	1.55	2.3	1.26	6.12	1.70333	-1.8452	1.23e-06	4.26e-06	O	L-proline 3-hydroxylase, C-terminal	-	ko:K21614
SMc00370	ycaN	63.71	72.66	71.32	163.81	184.71	190.14	69.23	179.553	1.3749	1.23e-06	4.27e-06	K	transcriptional regulator	GO:0003674,GO:0003676,GO:0003677,GO:0003700,GO:0005488,GO:0006139,GO:0006351,GO:0006355,GO:0006725,GO:0006807,GO:0008150,GO:0008152,GO:0009058,GO:0009059,GO:0009889,GO:0009987,GO:0010467,GO:0010468,GO:0010556,GO:0016070,GO:0018130,GO:0019219,GO:0019222,GO:0019438,GO:0031323,GO:0031326,GO:0032774,GO:0034641,GO:0034645,GO:0034654,GO:0043170,GO:0043565,GO:0044237,GO:0044238,GO:0044249,GO:0044260,GO:…	-
SMb20244	rfbE	9.21	9.51	8.7	42.98	31.78	24.47	9.14	33.0767	1.8555	1.26e-06	4.36e-06	M	Male sterility protein	-	ko:K12454
SMb20088	pcm	10.9	12.5	13.25	41.44	42.84	36.4	12.2167	40.2267	1.7193	1.27e-06	4.39e-06	O	Catalyzes the methyl esterification of L-isoaspartyl residues in peptides and proteins that result from spontaneous decomposition of normal L-aspartyl and L-asparaginyl residues. It plays a role in the repair and or degradation of damaged proteins	-	ko:K00573
SMb20286		32.83	26.56	21.41	81.71	75.08	80.32	26.9333	79.0367	1.5531	1.29e-06	4.48e-06	C	NAD/NADP octopine/nopaline dehydrogenase, alpha-helical domain	-	ko:K04940
SMb20392	nanR	4.8	4.69	4.15	17.81	20.27	20.71	4.54667	19.5967	2.1077	1.29e-06	4.48e-06	K	FCD	-	-
SMb21465	prsE	18.81	18.1	15.39	53.44	46.52	62.13	17.4333	54.03	1.6319	1.3e-06	4.51e-06	M	secretion protein	-	ko:K02022,ko:K12540
SMc00176		58.78	53.91	47.1	142.51	146.94	128.02	53.2633	139.157	1.3855	1.31e-06	4.54e-06	Q	ABC-type transport system involved in resistance to organic solvents, periplasmic component	-	ko:K02067
SMc03890		46.71	68.1	44.42	154.12	145.1	153.75	53.0767	150.99	1.5083	1.32e-06	4.56e-06	K	DeoR C terminal sensor domain	-	-
SMb20186	gfa	47.36	48.44	53.25	122.37	125.29	197.05	49.6833	148.237	1.5771	1.34e-06	4.61e-06	E	Catalyzes the condensation of formaldehyde and glutathione to S-hydroxymethylglutathione	-	ko:K03396
SMa1377		3.76	2.08	3.08	15.1	13.36	17.57	2.97333	15.3433	2.3675	1.34e-06	4.62e-06	J	Belongs to the amidase family	-	ko:K02433
SMc00883		67.34	69.28	62.75	166.9	166.75	166.3	66.4567	166.65	1.3263	1.36e-06	4.69e-06	G	gluconolactonase	-	ko:K13874,ko:K22217
SMa1065		7.4	7.03	6.29	2.71	2.76	1.88	6.90667	2.45	-1.4952	1.39e-06	4.78e-06	I	long-chain fatty acid transport protein	-	-
SMa1674		6.88	5.86	7.63	0.77	2.76	3.77	6.79	2.43333	-1.4805	1.39e-06	4.78e-06	#N/A	#N/A	#N/A	#N/A
SMb20284		43.47	45.45	42.01	115.79	109.17	119.23	43.6433	114.73	1.3944	1.41e-06	4.86e-06	E	Bacterial extracellular solute-binding protein	-	ko:K11069
SMc02642		8.82	9.25	8.96	41.05	23.95	33.89	9.01	32.9633	1.8713	1.43e-06	4.9e-06	-	-	-	-
SMa0868	nodB	6.88	5.73	4.68	22.85	19.35	28.87	5.76333	23.69	2.0393	1.43e-06	4.9e-06	G	deacetylase	GO:0005575,GO:0005622,GO:0005623,GO:0005737,GO:0044424,GO:0044464	ko:K14659
SMc01873	ftsA	34.39	29.3	26.63	82.48	79.69	91.62	30.1067	84.5967	1.4905	1.45e-06	4.99e-06	D	Cell division protein that is involved in the assembly of the Z ring. May serve as a membrane anchor for the Z ring	-	ko:K03590
SMc01950	livM	65.4	52.35	49.51	158	138.65	146.84	55.7533	147.83	1.4068	1.52e-06	5.21e-06	E	Belongs to the binding-protein-dependent transport system permease family	-	ko:K01998
SMb20360		10.25	12.89	13.92	31.37	47.9	52.09	12.3533	43.7867	1.8256	1.66e-06	5.67e-06	S	PeriplasmiC protein	-	-
SMb20466		22.71	17.19	15.92	52.28	62.18	57.11	18.6067	57.19	1.6199	1.71e-06	5.82e-06	G	M42 glutamyl aminopeptidase	-	-
SMc04285	cobE	38.67	40.76	38.67	92.16	111.01	118.6	39.3667	107.257	1.446	1.75e-06	5.96e-06	H	Cobalamin synthesis G C-terminus	-	ko:K02189,ko:K05934
SMb21473		1.17	2.86	2.54	12.39	12.9	13.18	2.19	12.8233	2.5498	1.77e-06	6.03e-06	-	-	-	-
SMc01529	dppFch3	23.1	19.66	18.46	59.64	68.63	53.34	20.4067	60.5367	1.5688	1.79e-06	6.08e-06	EP	ABC transporter	-	ko:K02032
SMc01233	ssb	218.51	202.62	156.15	470.12	460.16	528.39	192.427	486.223	1.3373	1.87e-06	6.34e-06	L	Plays an important role in DNA replication, recombination and repair. Binds to ssDNA and to an array of partner proteins to recruit them to their sites of action during DNA metabolism	GO:0006950,GO:0006974,GO:0007154,GO:0008150,GO:0009432,GO:0009605,GO:0009987,GO:0009991,GO:0031668,GO:0033554,GO:0050896,GO:0051716,GO:0071496	ko:K03111
SMc00114	ptrB	173.35	128.53	128.85	359.36	360.21	375.27	143.577	364.947	1.3459	1.91e-06	6.49e-06	E	Protease II	GO:0003674,GO:0003824,GO:0004175,GO:0004252,GO:0005575,GO:0005622,GO:0005623,GO:0005737,GO:0006508,GO:0006807,GO:0008150,GO:0008152,GO:0008233,GO:0008236,GO:0016787,GO:0017171,GO:0019538,GO:0043170,GO:0044238,GO:0044424,GO:0044464,GO:0070011,GO:0070012,GO:0071704,GO:0140096,GO:1901564	ko:K01354
SMa1725		9.08	8.85	8.7	27.88	32.24	33.26	8.87667	31.1267	1.8101	1.92e-06	6.53e-06	K	DJ-1/PfpI family	-	-
SMb21642		8.56	12.76	8.96	7.74	3.22	3.77	10.0933	4.91	-1.0396	1.94e-06	6.58e-06	S	Protein of unknown function (DUF992)	-	-
SMc03889	mosC	56.7	51.31	49.51	133.6	125.29	151.86	52.5067	136.917	1.3827	1.97e-06	6.66e-06	G	Major facilitator superfamily	-	-
SMc03239	ppa	125.09	107.82	97.41	275.33	258.41	286.78	110.107	273.507	1.3127	2e-06	6.78e-06	C	Catalyzes the hydrolysis of inorganic pyrophosphate (PPi) forming two phosphate ions	-	ko:K01507
SMc01595	envZ	38.02	37.89	37.33	106.11	104.1	90.99	37.7467	100.4	1.4113	2.14e-06	7.21e-06	T	Signal transduction histidine kinase	-	ko:K07638
SMc00914		141.82	114.33	120.82	286.95	340.4	314.4	125.657	313.917	1.3209	2.23e-06	7.51e-06	C	Reductase C-terminal	-	ko:K00529
SMa2361		31.53	29.56	26.36	84.42	82.91	73.42	29.15	80.25	1.461	2.28e-06	7.69e-06	S	ABC transporter substrate-binding protein PnrA-like	-	-
SMb20083		6.1	6.51	6.15	22.46	25.33	23.85	6.25333	23.88	1.9331	2.29e-06	7.71e-06	#N/A	#N/A	#N/A	#N/A
SMb20711		5.32	4.3	5.08	19.75	17.96	23.85	4.9	20.52	2.0662	2.3e-06	7.73e-06	G	Xylose isomerase-like TIM barrel	-	ko:K06606
SMb21599		6.23	3.65	6.42	23.23	18.42	27.61	5.43333	23.0867	2.0872	2.33e-06	7.85e-06	-	-	-	-
SMa2365	rbsA4	8.3	9.38	8.7	39.5	31.32	23.22	8.79333	31.3467	1.8338	2.47e-06	8.27e-06	S	ATPases associated with a variety of cellular activities	-	ko:K02056
SMc03181	phaD	25.3	26.17	25.16	72.8	72.78	67.77	25.5433	71.1167	1.4772	2.51e-06	8.39e-06	CP	Formate hydrogenlyase subunit 3 Multisubunit Na H antiporter, MnhD subunit	-	ko:K05561
SMc02732		53.46	45.84	44.42	123.14	127.59	121.74	47.9067	124.157	1.3739	2.58e-06	8.62e-06	S	protein conserved in bacteria	-	-
SMc01126	tme	156.88	132.04	117.35	349.68	329.81	325.69	135.423	335.06	1.3069	2.59e-06	8.64e-06	C	malic enzyme	-	ko:K00029
SMa1413		3.89	5.73	4.82	17.43	21.19	22.59	4.81333	20.4033	2.0837	2.63e-06	8.79e-06	K	Bacterial antitoxin of ParD toxin-antitoxin type II system and RHH	-	ko:K07746
SMa1086		42.43	35.68	34.12	99.52	92.12	114.21	37.41	101.95	1.4464	2.65e-06	8.83e-06	S	hyperosmotic response	-	-
SMa0247	MA20_14845	43.08	32.16	33.05	96.04	95.81	107.31	36.0967	99.72	1.466	2.66e-06	8.88e-06	S	Fumarylacetoacetate (FAA) hydrolase family	-	-
SMb21506		9.86	8.46	9.77	32.14	31.78	32	9.36333	31.9733	1.7718	2.66e-06	8.88e-06	M	G-rich domain on putative tyrosine kinase	-	-
SMc04046		35.94	34.38	38.4	104.94	89.36	99.78	36.24	98.0267	1.4356	2.71e-06	9.02e-06	S	Glutathione-dependent formaldehyde-activating enzyme	-	-
SMc00780		44.64	40.76	40.54	121.21	105.48	104.17	41.98	110.287	1.3935	2.84e-06	9.43e-06	K	Transcriptional regulator	-	-
SMb21541		6.62	8.33	9.63	3.1	4.15	4.39	8.19333	3.88	-1.0784	2.89e-06	9.59e-06	E	ATPases associated with a variety of cellular activities	-	ko:K02010,ko:K02052
SMc03060	aglR	16.61	16.15	13.51	53.05	48.83	40.16	15.4233	47.3467	1.6181	2.95e-06	9.8e-06	K	transcriptional	-	ko:K02529
SMc00679		48.14	55.99	49.64	135.54	123.91	139.31	51.2567	132.92	1.3747	3.05e-06	1.01e-05	K	Transcriptional regulator	-	-
SMc01968		14.66	18.23	13.78	45.7	48.83	49.58	15.5567	48.0367	1.6266	3.08e-06	1.02e-05	K	LysR substrate binding domain	-	ko:K03566
SMc03097	tamA	80.45	67.45	69.31	195.17	169.05	183.87	72.4033	182.697	1.3353	3.24e-06	1.07e-05	M	Membrane	-	ko:K07278
SMb21043		7.92	10.81	7.23	5.03	3.22	4.39	8.65333	4.21333	-1.0383	3.24e-06	1.07e-05	E	Tripartite tricarboxylate transporter family receptor	-	-
SMc01180		37.24	33.86	33.32	82.87	93.97	109.19	34.8067	95.3433	1.4538	3.28e-06	1.08e-05	-	-	-	-
SMc01471	senC	48.14	58.99	44.02	121.98	138.19	143.08	50.3833	134.417	1.4157	3.43e-06	1.13e-05	S	protein SCO1 SenC PrrC, involved in biogenesis of respiratory and photosynthetic systems	-	ko:K07152
SMb21002	map2	49.96	48.31	39.47	109.2	143.71	117.98	45.9133	123.63	1.429	3.45e-06	1.13e-05	E	Methionine aminopeptidase	-	ko:K01265
SMc00075	rimJ	28.03	33.6	28.37	76.29	84.29	88.48	30	83.02	1.4685	3.53e-06	1.16e-05	J	Acetyltransferases, including N-acetylases of ribosomal proteins	-	ko:K03790
SMb20681	gcl	3.63	4.43	4.68	15.88	19.81	19.45	4.24667	18.38	2.1137	3.54e-06	1.16e-05	S	Thiamine pyrophosphate enzyme, central domain	-	ko:K01608
SMa2331	kdpB	3.37	2.6	2.54	12.39	11.52	20.08	2.83667	14.6633	2.3699	3.72e-06	1.22e-05	P	Part of the high-affinity ATP-driven potassium transport (or Kdp) system, which catalyzes the hydrolysis of ATP coupled with the electrogenic transport of potassium into the cytoplasm. This subunit is responsible for energy coupling to the transport system	-	ko:K01547
SMc02142	pstB	48.66	51.18	44.02	124.31	127.59	116.72	47.9533	122.873	1.3575	3.72e-06	1.22e-05	P	Part of the ABC transporter complex PstSACB involved in phosphate import. Responsible for energy coupling to the transport system	-	ko:K02036
SMa2255		6.88	8.72	7.36	27.88	29.02	25.1	7.65333	27.3333	1.8365	3.75e-06	1.23e-05	-	-	-	-
SMc01610		29.45	29.3	34.52	79.39	92.12	87.23	31.09	86.2467	1.472	3.8e-06	1.24e-05	K	Bacterial regulatory helix-turn-helix proteins, AraC family	-	ko:K07506
SMc02262	aruH	49.05	43.36	41.48	113.85	115.62	116.09	44.63	115.187	1.3679	3.97e-06	1.3e-05	E	Cys/Met metabolism PLP-dependent enzyme	-	ko:K00812,ko:K12252
SMc02557		117.04	104.04	109.85	282.3	254.26	263.57	110.31	266.71	1.2737	3.99e-06	1.3e-05	-	-	-	-
SMc00557	alr	51.25	41.93	35.86	105.72	118.38	126.13	43.0133	116.743	1.4405	4.07e-06	1.33e-05	E	Catalyzes the interconversion of L-alanine and D- alanine. May also act on other amino acids	-	ko:K01775
SMc02368	glnE	106.4	113.68	108.51	265.26	274.99	249.13	109.53	263.127	1.2644	4.14e-06	1.35e-05	OT	Involved in the regulation of glutamine synthetase GlnA, a key enzyme in the process to assimilate ammonia. When cellular nitrogen levels are high, the C-terminal adenylyl transferase (AT) inactivates GlnA by covalent transfer of an adenylyl group from ATP to specific tyrosine residue of GlnA, thus reducing its activity. Conversely, when nitrogen levels are low, the N-terminal adenylyl removase (…	GO:0000820,GO:0003674,GO:0003824,GO:0005575,GO:0005622,GO:0005623,GO:0005737,GO:0005829,GO:0006521,GO:0008150,GO:0008882,GO:0010565,GO:0016740,GO:0016772,GO:0016779,GO:0019222,GO:0031323,GO:0033238,GO:0044424,GO:0044444,GO:0044464,GO:0050789,GO:0050794,GO:0051171,GO:0062012,GO:0065007,GO:0070566,GO:0080090	ko:K00982
SMc00774	acsA1	112.37	124.49	119.35	278.82	277.29	304.36	118.737	286.823	1.2724	4.16e-06	1.36e-05	I	Acyl-coenzyme A synthetases AMP-(fatty) acid ligases	-	ko:K01907
SMa0958	atrC	9.47	9.51	9.63	33.3	32.7	29.49	9.53667	31.83	1.7388	4.17e-06	1.36e-05	EH	Belongs to the TPP enzyme family	-	ko:K01652
SMc02644	tex	125.86	157.95	132.47	323.74	352.38	350.79	138.76	342.303	1.3027	4.21e-06	1.37e-05	K	Transcriptional accessory protein	GO:0005575,GO:0005622,GO:0005623,GO:0005737,GO:0005829,GO:0008150,GO:0009314,GO:0009628,GO:0010212,GO:0044424,GO:0044444,GO:0044464,GO:0050896	ko:K06959
SMc03891	tcyA	56.31	60.03	52.45	129.73	162.14	142.45	56.2633	144.773	1.3635	4.22e-06	1.37e-05	ET	belongs to the bacterial solute-binding protein 3 family	-	ko:K02424
SMc00513		34.77	36.07	26.63	99.14	86.6	82.83	32.49	89.5233	1.4623	4.36e-06	1.41e-05	E	ABC-type branched-chain amino acid transport systems, periplasmic component	-	ko:K01999
SMc01966		62.02	78.26	67.3	171.94	170.89	188.89	69.1933	177.24	1.357	4.43e-06	1.44e-05	E	Bacterial extracellular solute-binding protein	-	ko:K02055
SMc00265	MA20_29430	17	11.85	12.71	37.18	51.13	45.81	13.8533	44.7067	1.6903	4.8e-06	1.55e-05	G	Bacterial extracellular solute-binding protein, family 7	-	-
SMc01128	barA	38.8	40.89	33.45	115.01	97.65	90.37	37.7133	101.01	1.4214	4.89e-06	1.58e-05	T	Histidine kinase	-	-
SMc00689		99.91	106.78	103.16	241.25	241.83	263.57	103.283	248.883	1.2689	5.01e-06	1.62e-05	S	protein conserved in bacteria	-	-
SMb20140		1.56	3	3.61	12	16.12	14.43	2.72333	14.1833	2.3808	5.19e-06	1.68e-05	EM	Belongs to the DapA family	-	ko:K01714
SMc01606		10.77	9.77	11.11	34.46	34.55	33.89	10.55	34.3	1.701	5.59e-06	1.8e-05	P	transport system permease	-	ko:K02054
SMc04251	smoM	208.78	175.27	178.23	415.9	449.11	474.42	187.427	446.477	1.2523	5.63e-06	1.81e-05	Q	Part of the tripartite ATP-independent periplasmic (TRAP) transport system	GO:0003674,GO:0005488,GO:0005515,GO:0005575,GO:0005623,GO:0006810,GO:0008150,GO:0031317,GO:0032991,GO:0036094,GO:0042802,GO:0042803,GO:0043167,GO:0043169,GO:0043177,GO:0044464,GO:0046872,GO:0046983,GO:0051179,GO:0051234,GO:0071702,GO:1990351	-
SMc01587	ycbL	82.4	60.16	57.27	178.52	176.42	168.81	66.61	174.583	1.3901	5.64e-06	1.82e-05	S	Zn-dependent hydrolases, including glyoxylases	GO:0003674,GO:0003824,GO:0004416,GO:0005575,GO:0005622,GO:0005623,GO:0005737,GO:0005829,GO:0006081,GO:0006082,GO:0006089,GO:0008150,GO:0008152,GO:0009056,GO:0009438,GO:0009987,GO:0016787,GO:0016788,GO:0016790,GO:0019243,GO:0019752,GO:0032787,GO:0042180,GO:0042182,GO:0043436,GO:0044237,GO:0044248,GO:0044281,GO:0044282,GO:0044424,GO:0044444,GO:0044464,GO:0046185,GO:0051596,GO:0061727,GO:0071704,GO:…	-
SMc02256	hipO	24.26	17.19	14.58	56.93	55.27	58.99	18.6767	57.0633	1.6113	5.85e-06	1.88e-05	S	amidohydrolase	-	ko:K01451
SMb20095		3.5	4.56	3.21	17.04	13.36	20.08	3.75667	16.8267	2.1632	5.98e-06	1.92e-05	EH	Belongs to the TPP enzyme family	-	ko:K00156,ko:K00158
SMc03295		4.02	5.6	4.82	0.77	1.38	0.63	4.81333	0.926667	-2.3769	6.1e-06	1.96e-05	L	Transposase	-	ko:K07483
SMa1186	nosL	9.6	11.46	9.9	35.63	28.56	38.91	10.32	34.3667	1.7356	6.17e-06	1.98e-05	C	NosL	-	ko:K19342
SMb20904	xylG	28.29	21.1	19.13	84.42	60.8	60.24	22.84	68.4867	1.5843	6.25e-06	2e-05	G	ABC transporter, ATP-binding protein	-	ko:K10545
SMb20830	kdsD	15.44	14.71	13.78	47.24	42.38	42.67	14.6433	44.0967	1.5904	6.26e-06	2e-05	M	Belongs to the SIS family. GutQ KpsF subfamily	-	ko:K06041
SMb20609	MA20_23075	31.53	30.6	32.65	80.93	101.8	76.56	31.5933	86.43	1.4519	6.51e-06	2.08e-05	T	Histidine kinase	-	ko:K20971
SMc00650		39.58	33.08	30.91	98.36	88.44	89.74	34.5233	92.18	1.4169	6.53e-06	2.08e-05	S	Transposase	-	-
SMb21463		16.74	18.49	16.59	49.57	52.97	48.95	17.2733	50.4967	1.5476	6.58e-06	2.1e-05	G	Family 4 glycosyl hydrolase	-	ko:K01222
SMa0081		2.08	1.82	2.14	8.91	12.44	12.55	2.01333	11.3	2.4887	6.87e-06	2.19e-05	E	Binding-protein-dependent transport system inner membrane component	-	ko:K02029
SMc01576		29.45	31.9	30.24	92.94	72.32	84.09	30.53	83.1167	1.4449	7.07e-06	2.25e-05	E	Oxidoreductase	-	-
SMb21013		4.54	6.38	3.88	15.1	19.35	30.12	4.93333	21.5233	2.1253	7.08e-06	2.25e-05	E	Glyoxalase/Bleomycin resistance protein/Dioxygenase superfamily	-	-
SMb20708	ogt	19.46	19.92	17.53	46.47	56.2	66.52	18.97	56.3967	1.5719	7.2e-06	2.29e-05	L	Cysteine methyltransferase	-	ko:K00567
SMc03195	ung	35.16	38.41	33.18	89.07	90.74	102.29	35.5833	94.0333	1.402	7.57e-06	2.4e-05	L	Excises uracil residues from the DNA which can arise as a result of misincorporation of dUMP residues by DNA polymerase or due to deamination of cytosine	-	ko:K03648
SMa1297		4.8	7.16	7.23	23.62	22.57	26.36	6.39667	24.1833	1.9186	7.63e-06	2.42e-05	S	membrane	-	-
SMc01338		5.45	4.95	4.55	0.77	1.84	1.26	4.98333	1.29	-1.9497	7.71e-06	2.44e-05	L	Transposase and inactivated	-	ko:K07494
SMb20177		3.11	4.3	3.48	16.65	12.44	20.08	3.63	16.39	2.1748	7.79e-06	2.47e-05	S	Protein of unknown function (DUF2380)	-	-
SMa1515		6.62	6.12	5.89	1.94	4.15	0.63	6.21	2.24	-1.4711	8.17e-06	2.58e-05	S	Evidence 4 Homologs of previously reported genes of	-	-
SMb21198	oppC	4.93	3.91	2.81	15.88	16.58	18.2	3.88333	16.8867	2.1205	8.21e-06	2.59e-05	EP	ABC-type dipeptide oligopeptide nickel transport systems, permease components	GO:0005575,GO:0005623,GO:0005886,GO:0016020,GO:0044464,GO:0071944	ko:K15582
SMc01449		82.66	85.03	78.14	173.87	212.81	230.93	81.9433	205.87	1.329	8.25e-06	2.6e-05	S	Protein of unknown function (DUF2853)	-	-
SMa1755	MA20_01570	18.43	18.1	16.73	51.12	58.5	45.18	17.7533	51.6	1.5393	8.31e-06	2.62e-05	E	Bacterial extracellular solute-binding protein	-	ko:K02055
SMb20094		4.93	7.29	6.02	26.33	21.65	20.71	6.08	22.8967	1.913	8.42e-06	2.65e-05	I	Phospholipase D. Active site motifs.	-	ko:K01115
SMa2215	hutC	58.65	80.61	69.18	176.58	170.89	196.42	69.48	181.297	1.3837	8.44e-06	2.66e-05	K	UTRA	-	ko:K05836
SMc02320		25.56	21.49	22.35	63.51	84.29	53.97	23.1333	67.2567	1.5397	8.57e-06	2.69e-05	S	Transglycosylase associated protein	-	-
SMc00146		19.59	17.97	14.18	50.73	51.13	50.2	17.2467	50.6867	1.5553	8.94e-06	2.81e-05	K	helix_turn_helix multiple antibiotic resistance protein	-	-
SMc01235	uvrA	366.69	329.97	308.28	733.83	777.07	781.91	334.98	764.27	1.19	9.25e-06	2.9e-05	L	The UvrABC repair system catalyzes the recognition and processing of DNA lesions. UvrA is an ATPase and a DNA-binding protein. A damage recognition complex composed of 2 UvrA and 2 UvrB subunits scans DNA for abnormalities. When the presence of a lesion has been verified by UvrB, the UvrA molecules dissociate	-	ko:K03701
SMc04112	cpaB	7.27	6.12	6.15	20.52	23.49	28.24	6.51333	24.0833	1.8866	9.28e-06	2.91e-05	U	Pilus assembly protein CpaB	-	ko:K02279
SMa1153		69.81	54.69	52.18	147.54	137.27	183.87	58.8933	156.227	1.4075	9.28e-06	2.91e-05	S	bacterial OsmY and nodulation domain	-	-
SMc02326		31.01	36.72	30.11	83.65	89.82	87.23	32.6133	86.9	1.4139	9.43e-06	2.95e-05	-	-	-	-
SMa0142		5.58	4.56	3.21	24.78	15.2	16.32	4.45	18.7667	2.0763	9.44e-06	2.95e-05	O	Subtilase family	-	-
SMc01827	thiY	62.93	55.34	59.68	143.28	144.64	154.37	59.3167	147.43	1.3135	9.87e-06	3.08e-05	P	ABC-type nitrate sulfonate bicarbonate transport systems, periplasmic components	-	ko:K02051
SMc01723		11.42	9.25	11.24	33.69	31.32	38.91	10.6367	34.64	1.7034	9.91e-06	3.09e-05	S	membrane	-	-
SMc02241	MA20_22060	16.35	15.89	15.25	51.89	43.3	44.56	15.83	46.5833	1.5572	1.02e-05	3.19e-05	S	Methyltransferase	-	-
SMc00026		38.28	36.59	39.34	97.59	101.34	96.01	38.07	98.3133	1.3687	1.03e-05	3.22e-05	S	Protein of unknown function (DUF1499)	-	-
SMb21316	wgdA	6.1	4.69	2.54	20.52	18.42	17.57	4.44333	18.8367	2.0838	1.04e-05	3.23e-05	V	ABC-type protease lipase transport system, ATPase and permease components	-	ko:K06148,ko:K12539,ko:K16299
SMb21497		17.39	19.66	23.95	56.93	58.04	64.64	20.3333	59.87	1.558	1.07e-05	3.32e-05	M	Belongs to the membrane fusion protein (MFP) (TC 8.A.1) family	-	ko:K03585
SMc03086	fdsD	2.98	2.21	3.21	13.17	14.28	12.55	2.8	13.3333	2.2515	1.11e-05	3.46e-05	S	NADH-dependant formate dehydrogenase delta subunit FdsD	-	ko:K00126
SMb21191	msbA	8.95	7.68	8.03	25.95	25.79	33.26	8.22	28.3333	1.7853	1.13e-05	3.5e-05	V	ABC transporter	-	ko:K06147,ko:K11085
SMc01627		11.94	15.24	13.38	36.01	38.69	56.48	13.52	43.7267	1.6934	1.13e-05	3.51e-05	G	Binding-protein-dependent transport system inner membrane component	-	ko:K02025
SMc00495	purC	245.24	178.79	180.23	538.27	486.88	475.05	201.42	500.067	1.3119	1.13e-05	3.51e-05	F	Belongs to the SAICAR synthetase family	-	ko:K01923
SMc02587	ynjD	11.55	13.54	9.5	35.24	35.01	40.16	11.53	36.8033	1.6744	1.15e-05	3.55e-05	S	ATPases associated with a variety of cellular activities	-	ko:K05779
SMb20723		19.85	19.92	18.87	64.28	52.97	49.58	19.5467	55.61	1.5084	1.16e-05	3.58e-05	P	Iron ABC transporter	-	ko:K02012
SMa0617		18.56	18.49	17.8	53.44	52.05	50.2	18.2833	51.8967	1.5051	1.23e-05	3.79e-05	C	C-type cytochrome. Part of the cbb3-type cytochrome c oxidase complex	-	ko:K00406
SMb21461		8.17	9.12	8.83	27.88	24.87	37.02	8.70667	29.9233	1.7811	1.24e-05	3.82e-05	G	Bacterial extracellular solute-binding protein	-	ko:K02027,ko:K10236
SMc04305	cobP	244.85	215.25	211.68	484.83	526.03	540.31	223.927	517.057	1.2073	1.25e-05	3.85e-05	H	Catalyzes ATP-dependent phosphorylation of adenosylcobinamide and addition of GMP to adenosylcobinamide phosphate	-	ko:K02231
SMa0708		3.24	3	2.68	10.84	16.58	14.43	2.97333	13.95	2.2301	1.28e-05	3.94e-05	M	Mandelate racemase muconate lactonizing enzyme	-	ko:K01684
SMb20105		18.3	17.06	19.13	47.63	55.74	53.97	18.1633	52.4467	1.5298	1.28e-05	3.94e-05	K	Transcriptional regulator	-	ko:K22293
SMb20764	phnL	5.06	6.25	3.88	20.14	23.03	16.32	5.06333	19.83	1.9695	1.31e-05	4.02e-05	P	ABC transporter	GO:0005575,GO:0006793,GO:0008150,GO:0008152,GO:0009056,GO:0009987,GO:0019634,GO:0019637,GO:0019700,GO:0032991,GO:0044237,GO:0046434,GO:0061694,GO:0061695,GO:0071704,GO:1901575,GO:1902494,GO:1990234	ko:K05780
SMa0620		10.12	10.16	7.76	28.66	28.56	36.4	9.34667	31.2067	1.7393	1.36e-05	4.18e-05	S	Predicted integral membrane protein (DUF2189)	-	-
SMc00287	MA20_30235	177.77	150.27	136.61	376.02	360.67	365.85	154.883	367.513	1.2466	1.38e-05	4.22e-05	S	ETC complex I subunit conserved region	-	ko:K00329
SMc04052		5.71	4.95	3.88	18.98	20.27	17.57	4.84667	18.94	1.9664	1.4e-05	4.28e-05	K	Transcriptional regulator	-	-
SMb20106		6.75	5.73	5.22	24.01	18.42	23.22	5.9	21.8833	1.891	1.4e-05	4.29e-05	K	Transcriptional regulator	-	-
SMc03207		83.3	82.17	70.78	214.92	175.5	189.52	78.75	193.313	1.2956	1.45e-05	4.42e-05	Q	hydrolase	-	ko:K16171
SMc02067	tatA	54.5	48.05	45.76	112.69	139.11	125.51	49.4367	125.77	1.3471	1.47e-05	4.48e-05	U	Part of the twin-arginine translocation (Tat) system that transports large folded proteins containing a characteristic twin-arginine motif in their signal peptide across membranes. TatA could form the protein-conducting channel of the Tat system	GO:0003674,GO:0005215	ko:K03116
SMc01049	hflX	572.49	435.71	451.45	1169.87	1202.68	1093.17	486.55	1155.24	1.2475	1.48e-05	4.52e-05	S	GTPase that associates with the 50S ribosomal subunit and may have a role during protein synthesis or ribosome biogenesis	GO:0000166,GO:0001882,GO:0001883,GO:0003674,GO:0003676,GO:0003723,GO:0003824,GO:0003924,GO:0005488,GO:0005524,GO:0005525,GO:0005575,GO:0005622,GO:0005623,GO:0005737,GO:0005829,GO:0006412,GO:0006414,GO:0006417,GO:0006464,GO:0006468,GO:0006518,GO:0006793,GO:0006796,GO:0006807,GO:0006950,GO:0006996,GO:0008144,GO:0008150,GO:0008152,GO:0009058,GO:0009059,GO:0009266,GO:0009408,GO:0009628,GO:0009889,GO:…	ko:K03665
SMc02556		59.82	60.16	55.13	138.63	133.58	166.3	58.37	146.17	1.3243	1.48e-05	4.53e-05	-	-	-	-
SMb21429	fecE	7.53	4.43	5.89	21.69	21.65	23.85	5.95	22.3967	1.9123	1.49e-05	4.54e-05	HP	ABC transporter	-	ko:K02013
SMb20933	exsG	24.78	24.61	27.97	70.48	71.86	67.77	25.7867	70.0367	1.4415	1.51e-05	4.61e-05	T	HWE histidine kinase	-	-
SMc01656	prr	14.53	9.12	12.18	37.56	34.55	43.3	11.9433	38.47	1.6875	1.67e-05	5.07e-05	C	Belongs to the aldehyde dehydrogenase family	-	ko:K00137
SMa2165		4.8	5.73	4.95	18.98	19.81	20.08	5.16	19.6233	1.9271	1.7e-05	5.14e-05	IQ	Enoyl-(Acyl carrier protein) reductase	-	-
SMa1894	msrB	7.53	7.29	10.84	29.04	29.02	30.12	8.55333	29.3933	1.7809	1.7e-05	5.14e-05	O	methionine sulfoxide reductase	-	ko:K07305
SMc03259		305.58	214.99	225.06	554.15	649.94	657.66	248.543	620.583	1.3201	1.74e-05	5.24e-05	EM	Belongs to the DapA family	-	ko:K01714,ko:K21062
SMa2333	kdpA	4.41	4.3	5.35	22.46	16.12	16.94	4.68667	18.5067	1.9814	1.74e-05	5.25e-05	P	Part of the high-affinity ATP-driven potassium transport (or Kdp) system, which catalyzes the hydrolysis of ATP coupled with the electrogenic transport of potassium into the cytoplasm. This subunit binds and transports the potassium across the cytoplasmic membrane	GO:0003674,GO:0003824,GO:0005215,GO:0005488,GO:0005575,GO:0005623,GO:0005886,GO:0006810,GO:0006811,GO:0006812,GO:0006813,GO:0008150,GO:0008324,GO:0008556,GO:0009987,GO:0015075,GO:0015077,GO:0015079,GO:0015318,GO:0015399,GO:0015405,GO:0015662,GO:0015672,GO:0016020,GO:0016462,GO:0016787,GO:0016817,GO:0016818,GO:0016887,GO:0017111,GO:0019829,GO:0022804,GO:0022853,GO:0022857,GO:0022890,GO:0030001,GO:…	ko:K01546
SMc01131	rlmI	39.45	43.88	34.12	95.26	114.69	96.64	39.15	102.197	1.3843	1.77e-05	5.34e-05	J	Belongs to the methyltransferase superfamily	-	ko:K06969
SMc00238	moeA	33.87	26.82	29.3	82.87	81.07	75.3	29.9967	79.7467	1.4106	1.79e-05	5.41e-05	H	molybdopterin	GO:0003674,GO:0003824,GO:0005488,GO:0005515,GO:0005575,GO:0005622,GO:0005623,GO:0005737,GO:0005829,GO:0006139,GO:0006163,GO:0006464,GO:0006725,GO:0006732,GO:0006753,GO:0006777,GO:0006793,GO:0006796,GO:0006807,GO:0008150,GO:0008152,GO:0009058,GO:0009108,GO:0009116,GO:0009117,GO:0009119,GO:0009141,GO:0009144,GO:0009150,GO:0009199,GO:0009205,GO:0009259,GO:0009987,GO:0016740,GO:0016772,GO:0016779,GO:…	ko:K03750
SMc00429		21.15	18.75	19.27	56.93	55.74	52.09	19.7233	54.92	1.4774	1.86e-05	5.59e-05	K	AraC-like ligand binding domain	-	-
SMb20138	MA20_05990	12.85	12.11	16.32	29.04	60.8	52.09	13.76	47.31	1.7817	1.88e-05	5.66e-05	S	Amidohydrolase	-	ko:K07045
SMc00964	bioY	75.78	71.75	63.56	200.98	152.01	175.08	70.3633	176.023	1.3229	1.9e-05	5.71e-05	S	BioY family	-	ko:K03523
SMc02483	sucB	974.08	758.91	688.82	2050.47	2017.98	1780.32	807.27	1949.59	1.272	1.9e-05	5.71e-05	C	The 2-oxoglutarate dehydrogenase complex catalyzes the overall conversion of 2-oxoglutarate to succinyl-CoA and CO(2)	-	ko:K00658
SMc02857	dnaK	2391.55	2338.59	2128.95	4990.44	4819.49	5270.06	2286.36	5026.66	1.1365	1.91e-05	5.75e-05	O	Heat shock 70 kDa protein	-	ko:K04043
SMa0137		20.24	14.98	14.58	47.24	49.75	48.95	16.6	48.6467	1.5512	2.01e-05	6.02e-05	T	Diguanylate cyclase	-	-
SMb20261		18.68	19.79	20.74	56.54	50.67	59.62	19.7367	55.61	1.4945	2.01e-05	6.03e-05	C	Belongs to the LDH2 MDH2 oxidoreductase family	-	ko:K13609
SMa6522	MA20_04240	0.52	0.65	0.54	8.52	3.68	5.02	0.57	5.74	3.332	2.15e-05	6.43e-05	C	NAD(FAD)-dependent	-	-
SMc01289	secY	263.41	231.01	205.79	577.77	521.42	532.15	233.403	543.78	1.2202	2.16e-05	6.44e-05	U	The central subunit of the protein translocation channel SecYEG. Consists of two halves formed by TMs 1-5 and 6-10. These two domains form a lateral gate at the front which open onto the bilayer between TMs 2 and 7, and are clamped together by SecE at the back. The channel is closed by both a pore ring composed of hydrophobic SecY resides and a short helix (helix 2A) on the extracellular side of …	-	ko:K03076
SMc02308		26.73	27.74	28.5	77.06	84.29	62.13	27.6567	74.4933	1.4295	2.16e-05	6.44e-05	S	Belongs to the UPF0262 family	-	-
SMc01217		15.31	16.15	17.26	40.66	42.84	70.28	16.24	51.26	1.6583	2.17e-05	6.47e-05	EGP	Sugar (and other) transporter	-	-
SMc00599	moaE	13.49	10.68	12.31	37.56	36.39	37.65	12.16	37.2	1.6132	2.17e-05	6.47e-05	H	molybdopterin	-	ko:K03635
SMa0097		6.75	9.25	6.96	25.17	29.02	24.47	7.65333	26.22	1.7765	2.18e-05	6.5e-05	K	Transcriptional regulator	-	ko:K21645
SMc00380	pecS	33.35	33.21	26.63	71.25	84.75	96.01	31.0633	84.0033	1.4352	2.26e-05	6.72e-05	K	transcriptional regulator	GO:0005575,GO:0005622,GO:0005623,GO:0005737,GO:0044424,GO:0044464	-
SMc00236	trpC	54.24	37.63	38.67	129.34	121.6	99.78	43.5133	116.907	1.4258	2.27e-05	6.77e-05	E	Belongs to the TrpC family	GO:0003674,GO:0003824,GO:0004425,GO:0016829,GO:0016830,GO:0016831	ko:K01609,ko:K13498
SMa1519	nuoI2	5.19	4.82	4.28	18.59	22.11	14.43	4.76333	18.3767	1.9478	2.3e-05	6.83e-05	C	NDH-1 shuttles electrons from NADH, via FMN and iron- sulfur (Fe-S) centers, to quinones in the respiratory chain. The immediate electron acceptor for the enzyme in this species is believed to be ubiquinone. Couples the redox reaction to proton translocation (for every two electrons transferred, four hydrogen ions are translocated across the cytoplasmic membrane), and thus conserves the redox ene…	-	ko:K00338
SMc04091	htpX	210.47	231.01	211.14	466.24	508.07	517.72	217.54	497.343	1.193	2.34e-05	6.95e-05	O	Belongs to the peptidase M48B family	-	ko:K03799
SMc00857	sohB	193.08	210.3	172.74	435.26	418.24	506.42	192.04	453.307	1.2391	2.34e-05	6.95e-05	OU	Periplasmic serine proteases (ClpP class)	-	ko:K04773,ko:K04774
SMa0013		4.67	5.08	7.09	23.23	18.89	21.34	5.61333	21.1533	1.914	2.34e-05	6.96e-05	S	Sel1 repeat	-	ko:K07126
SMa2339	vbsA	22.06	18.23	20.2	59.64	53.43	55.22	20.1633	56.0967	1.4762	2.4e-05	7.13e-05	J	Siderophore biosynthesis protein domain	-	ko:K03896
SMb21464		7.92	8.99	8.3	27.49	26.72	28.87	8.40333	27.6933	1.7205	2.43e-05	7.21e-05	K	UTRA	-	ko:K03710
SMc02152		169.46	160.56	141.7	396.54	376.79	331.97	157.24	368.433	1.2284	2.48e-05	7.35e-05	L	SNF2 family N-terminal domain	-	-
SMb20669	MA20_16445	4.28	3.91	4.95	17.81	18.89	15.06	4.38	17.2533	1.9779	2.53e-05	7.5e-05	G	Belongs to the hyi family	-	ko:K01816,ko:K22131
SMc00194		46.32	47.01	43.49	124.69	105.48	111.7	45.6067	113.957	1.3212	2.55e-05	7.54e-05	O	secreted Zn-dependent protease	-	-
SMc02143	pstA	21.93	23.7	32.51	82.87	73.7	67.77	26.0467	74.78	1.5216	2.56e-05	7.56e-05	P	Phosphate transport system permease	-	ko:K02038
SMb20479		4.02	4.04	2.68	14.72	17.5	13.18	3.58	15.1333	2.0797	2.59e-05	7.66e-05	E	ATPases associated with a variety of cellular activities	-	ko:K02032
SMc01208	ppiB	124.7	93.5	88.44	266.04	237.22	258.55	102.213	253.937	1.3129	2.62e-05	7.73e-05	O	PPIases accelerate the folding of proteins. It catalyzes the cis-trans isomerization of proline imidic peptide bonds in oligopeptides	-	ko:K01802,ko:K03767,ko:K03768,ko:K09565
SMc02273	rkpA	538.23	411.23	376.66	1130.37	1061.73	1004.69	442.04	1065.6	1.2694	2.66e-05	7.85e-05	Q	Acyl transferase domain in polyketide synthase (PKS) enzymes.	-	-
SMc00558		18.94	23.18	21.54	52.67	68.17	58.36	21.22	59.7333	1.4931	2.67e-05	7.88e-05	K	transcriptional regulator	-	ko:K07506
SMa0380		7.79	9.9	8.03	29.82	30.86	23.85	8.57333	28.1767	1.7166	2.68e-05	7.89e-05	S	metal-dependent hydrolase with the TIM-barrel fold	-	-
SMc02818		47.23	61.72	56.2	169.61	122.06	144.33	55.05	145.333	1.4006	2.71e-05	7.97e-05	I	Serine aminopeptidase, S33	-	-
SMc00229	MA20_12960	21.15	20.31	20.61	62.73	49.75	59.62	20.69	57.3667	1.4713	2.73e-05	8.03e-05	S	Protein of unknown function (DUF502)	-	-
SMb20666	MA20_16455	15.57	15.24	20.2	51.12	51.59	46.44	17.0033	49.7167	1.5479	2.74e-05	8.07e-05	G	Class II Aldolase and Adducin N-terminal domain	-	ko:K22130
SMb20867		3.24	4.3	5.35	1.55	0.92	0	4.29667	0.823333	-2.3837	2.77e-05	8.14e-05	#N/A	#N/A	#N/A	#N/A
SMa1184	nosF	19.2	26.69	22.75	76.29	54.35	65.89	22.88	65.51	1.5176	2.84e-05	8.32e-05	V	AAA domain, putative AbiEii toxin, Type IV TA system	-	ko:K01990,ko:K19340
SMa5011		3.11	2.34	2.41	16.26	9.67	11.3	2.62	12.41	2.2439	2.84e-05	8.33e-05	C	Aerobic-type carbon monoxide dehydrogenase small subunit CoxS	-	ko:K03518
SMc01409		51.38	56.38	54.86	127.79	135.42	136.18	54.2067	133.13	1.2963	2.86e-05	8.39e-05	S	Adenylate cyclase	-	-
SMb21261		67.21	64.98	65.97	158	151.54	166.3	66.0533	158.613	1.2638	2.87e-05	8.41e-05	E	ABC-type dipeptide transport system, periplasmic component	-	ko:K02035
SMb20256		37.63	44.14	44.29	99.52	105.48	121.74	42.02	108.913	1.374	2.92e-05	8.54e-05	S	Polyketide cyclase / dehydrase and lipid transport	-	-
SMc00396		14.27	15.76	13.51	44.53	38.69	43.93	14.5133	42.3833	1.5461	3.09e-05	9e-05	Q	protein, possibly involved in aromatic compounds catabolism	-	-
SMa1629		4.41	5.21	5.89	1.55	2.3	1.88	5.17	1.91	-1.4366	3.13e-05	9.11e-05	IQ	short-chain dehydrogenase	-	-
SMc00775	sfuB	67.73	62.24	64.36	158	157.53	149.98	64.7767	155.17	1.2603	3.13e-05	9.11e-05	P	ABC-type Fe3 transport system, permease component	-	ko:K02011
SMb20749	uxuB	38.93	36.2	33.05	94.88	90.74	88.48	36.06	91.3667	1.3413	3.2e-05	9.3e-05	G	Mannitol dehydrogenase	GO:0003674,GO:0003824,GO:0008150,GO:0008152,GO:0016491,GO:0016614,GO:0016616,GO:0055114	ko:K00040,ko:K00045
SMa0091		5.58	4.17	4.01	19.36	15.66	18.2	4.58667	17.74	1.9515	3.41e-05	9.87e-05	S	BA14K-like protein	-	-
SMc03965	ruvB	31.79	35.55	30.91	84.81	83.83	83.46	32.75	84.0333	1.3595	3.42e-05	9.9e-05	L	The RuvA-RuvB complex in the presence of ATP renatures cruciform structure in supercoiled DNA with palindromic sequence, indicating that it may promote strand exchange reactions in homologous recombination. RuvAB is a helicase that mediates the Holliday junction migration by localized denaturation and reannealing	GO:0006950,GO:0006974,GO:0007154,GO:0008150,GO:0009432,GO:0009605,GO:0009987,GO:0009991,GO:0031668,GO:0033554,GO:0050896,GO:0051716,GO:0071496	ko:K03551
SMc02738	proW	34.26	25.52	26.63	86.74	70.48	75.3	28.8033	77.5067	1.4281	3.53e-05	0.000101975	E	glycine betaine transport system, permease	GO:0003674,GO:0005215,GO:0005575,GO:0005623,GO:0005886,GO:0006810,GO:0006811,GO:0006812,GO:0006836,GO:0008150,GO:0015695,GO:0015696,GO:0015871,GO:0016020,GO:0044464,GO:0051179,GO:0051234,GO:0071702,GO:0071705,GO:0071944	ko:K02001
SMc01949	braF	47.1	32.68	30.91	96.42	108.71	92.88	36.8967	99.3367	1.4288	3.61e-05	0.000104169	E	ABC-type branched-chain amino acid transport systems, ATPase component	GO:0003333,GO:0006810,GO:0006811,GO:0006812,GO:0006820,GO:0006855,GO:0006865,GO:0008150,GO:0015711,GO:0015803,GO:0015804,GO:0015807,GO:0015808,GO:0015818,GO:0015829,GO:0015849,GO:0015893,GO:0032328,GO:0034220,GO:0042221,GO:0042493,GO:0042940,GO:0042941,GO:0043090,GO:0046942,GO:0050896,GO:0051179,GO:0051234,GO:0055085,GO:0071702,GO:0071705,GO:0089718,GO:0098655,GO:0098656,GO:0098657,GO:0098739,GO:…	ko:K01995,ko:K15783
SMa0992		6.75	7.81	4.68	3.87	1.84	3.14	6.41333	2.95	-1.1204	3.65e-05	0.000105205	L	conjugal transfer protein traA	-	-
SMc00684	p47K	114.58	104.83	111.86	268.36	249.66	251.64	110.423	256.553	1.2162	3.69e-05	0.000106336	S	cobalamin synthesis protein	-	-
SMb22022		5.58	6.25	5.35	2.71	2.76	1.88	5.72667	2.45	-1.2249	3.72e-05	0.00010735	T	Response regulator, receiver	-	ko:K13589
SMc01618		9.47	9.9	10.04	27.49	30.86	35.14	9.80333	31.1633	1.6685	3.74e-05	0.000107618	G	FGGY family of carbohydrate kinases, C-terminal domain	-	ko:K00854
SMb20334		21.28	22.27	20.47	56.15	61.26	55.85	21.34	57.7533	1.4363	3.75e-05	0.000108066	S	Sulfatase-modifying factor enzyme 1	-	-
SMb21292	MA20_17625	43.08	54.3	54.32	127.4	116.08	153.75	50.5667	132.41	1.3888	3.8e-05	0.000109291	S	Urate oxidase N-terminal	-	-
SMc03827		33.09	33.47	28.37	78.61	86.6	79.07	31.6433	81.4267	1.3636	3.91e-05	0.000112327	E	PFAM Lysine exporter protein (LYSE YGGA)	-	-
SMb20808		17.39	14.32	14.72	44.53	46.98	41.42	15.4767	44.31	1.5175	3.94e-05	0.000113126	-	-	-	-
SMa1630		4.41	4.82	4.95	1.16	1.38	2.51	4.72667	1.68333	-1.4895	4.05e-05	0.000116306	S	SnoaL-like domain	-	-
SMc01167	dnaA	205.79	173.45	175.55	436.04	435.29	401.62	184.93	424.317	1.1982	4.11e-05	0.000117906	L	it binds specifically double-stranded DNA at a 9 bp consensus (dnaA box) 5'-TTATC CA A CA A-3'. DnaA binds to ATP and to acidic phospholipids	GO:0003674,GO:0003676,GO:0003677,GO:0003688,GO:0003690,GO:0005488,GO:0005575,GO:0005622,GO:0005623,GO:0005737,GO:0005886,GO:0006139,GO:0006259,GO:0006260,GO:0006261,GO:0006270,GO:0006725,GO:0006807,GO:0008150,GO:0008152,GO:0009058,GO:0009059,GO:0009987,GO:0016020,GO:0034641,GO:0034645,GO:0043170,GO:0043565,GO:0044237,GO:0044238,GO:0044249,GO:0044260,GO:0044424,GO:0044464,GO:0046483,GO:0071704,GO:…	ko:K02313
SMb21579	hmrR	9.99	5.6	7.23	22.07	29.02	28.87	7.60667	26.6533	1.809	4.13e-05	0.000118325	K	Transcriptional regulator	-	ko:K19591
SMc03851	ccmG	18.43	15.24	14.18	43.76	47.9	45.18	15.95	45.6133	1.5159	4.13e-05	0.000118381	CO	Thiol disulfide interchange protein	GO:0005575,GO:0005623,GO:0042597,GO:0044464	ko:K02199
SMb20242		2.47	2.6	3.08	19.36	6.45	14.43	2.71667	13.4133	2.3038	4.15e-05	0.000118819	S	Glycosyl transferases group 1	-	-
SMa0067		4.02	4.43	3.35	15.88	16.58	14.43	3.93333	15.63	1.9905	4.38e-05	0.000125066	G	Periplasmic binding protein domain	-	ko:K02058
SMc01522		8.69	7.42	8.03	23.62	40.07	20.08	8.04667	27.9233	1.795	4.54e-05	0.000129415	K	Bacterial regulatory proteins, tetR family	-	-
SMb21430		16.35	11.2	10.97	41.05	36.85	38.91	12.84	38.9367	1.6005	4.55e-05	0.000129676	P	Belongs to the binding-protein-dependent transport system permease family. FecCD subfamily	GO:0005575,GO:0005623,GO:0005886,GO:0016020,GO:0044464,GO:0071944	ko:K02015
SMc06520		55.41	67.32	53.92	134.37	140.03	170.69	58.8833	148.363	1.3332	4.63e-05	0.000131776	#N/A	#N/A	#N/A	#N/A
SMa0748		7.66	7.68	9.5	25.56	26.72	29.49	8.28	27.2567	1.7189	4.68e-05	0.000132895	K	Transcriptional regulator	-	-
SMa1007		5.97	7.94	5.35	2.32	4.15	3.14	6.42	3.20333	-1.003	4.96e-05	0.000140776	Q	Domain of unknown function (DUF4396)	-	ko:K22348
SMa2225		27.77	35.68	31.58	80.93	85.22	81.58	31.6767	82.5767	1.3823	5.16e-05	0.000146193	C	BFD-like [2Fe-2S] binding domain	-	-
SMa1963	tcmP	5.84	6.12	8.83	27.11	22.57	22.59	6.93	24.09	1.7975	5.24e-05	0.000148332	Q	Leucine carboxyl methyltransferase	-	-
SMb21399		4.02	4.56	5.22	0.39	3.22	0.63	4.6	1.41333	-1.7025	5.26e-05	0.000148678	#N/A	#N/A	#N/A	#N/A
SMc01103	rbsK	43.08	53.91	49.37	131.66	113.77	121.74	48.7867	122.39	1.3269	5.63e-05	0.000158806	H	Catalyzes the phosphorylation of ribose at O-5 in a reaction requiring ATP and magnesium. The resulting D-ribose-5- phosphate can then be used either for sythesis of nucleotides, histidine, and tryptophan, or as a component of the pentose phosphate pathway	-	ko:K00852
SMb20404		5.71	4.95	4.68	19.36	19.35	16.94	5.11333	18.55	1.8591	5.64e-05	0.000159119	C	Molybdopterin-binding domain of aldehyde dehydrogenase	-	-
SMa1896	msrA	11.94	11.72	11.37	31.37	33.16	42.04	11.6767	35.5233	1.6051	5.72e-05	0.000161263	O	Has an important function as a repair enzyme for proteins that have been inactivated by oxidation. Catalyzes the reversible oxidation-reduction of methionine sulfoxide in proteins to methionine	-	ko:K07304
SMb20784		1.04	1.04	1.34	9.29	6.91	5.65	1.14	7.28333	2.6756	5.73e-05	0.000161393	E	ABC transporter	GO:0000166,GO:0003333,GO:0003674,GO:0005215,GO:0005304,GO:0005342,GO:0005488,GO:0005524,GO:0006810,GO:0006811,GO:0006812,GO:0006820,GO:0006855,GO:0006865,GO:0008144,GO:0008150,GO:0008324,GO:0008509,GO:0008514,GO:0015075,GO:0015171,GO:0015175,GO:0015179,GO:0015188,GO:0015238,GO:0015318,GO:0015658,GO:0015711,GO:0015801,GO:0015803,GO:0015804,GO:0015807,GO:0015818,GO:0015823,GO:0015829,GO:0015849,GO:…	ko:K01996
SMc01214		77.98	79.82	81.35	195.17	179.64	186.38	79.7167	187.063	1.2306	5.87e-05	0.000165191	E	Glucose dehydrogenase C-terminus	-	-
SMc00833	glcE	24.39	22.66	23.95	73.19	52.05	67.77	23.6667	64.3367	1.4428	5.89e-05	0.000165553	C	Glycolate oxidase subunit	-	ko:K11472
SMc00820	dgdR	144.68	142.59	124.84	311.73	310	311.89	137.37	311.207	1.1798	5.92e-05	0.000166381	K	Transcriptional regulator	-	-
SMc00051	mrpA	117.56	109.51	102.9	267.97	237.22	255.41	109.99	253.533	1.2048	6.02e-05	0.000168875	CP	NADH ubiquinone oxidoreductase subunit 5 (Chain L) multisubunit Na H antiporter, MnhA subunit	GO:0003674,GO:0005215,GO:0005451,GO:0006810,GO:0006811,GO:0006812,GO:0006814,GO:0008150,GO:0008324,GO:0015075,GO:0015077,GO:0015078,GO:0015081,GO:0015291,GO:0015297,GO:0015298,GO:0015299,GO:0015318,GO:0015385,GO:0015491,GO:0015672,GO:0022804,GO:0022857,GO:0022890,GO:0030001,GO:0034220,GO:0035725,GO:0046873,GO:0051179,GO:0051234,GO:0055085,GO:0098655,GO:0098660,GO:0098662,GO:0099516,GO:1902600	ko:K05565
SMb21085		35.81	28.65	28.1	77.45	88.44	74.68	30.8533	80.19	1.378	6.04e-05	0.000169327	S	zinc-finger binding domain of transposase IS66	-	ko:K07484
SMc02318	MA20_06000	17.52	22.27	19.13	56.15	46.06	64.01	19.64	55.4067	1.4963	6.05e-05	0.000169738	S	Aminoacyl-tRNA editing domain	-	-
SMc03746		6.23	7.03	5.22	1.94	4.61	2.51	6.16	3.02	-1.0284	6.18e-05	0.000173188	-	-	-	-
SMc02702	MA20_44640	35.29	32.03	32.65	89.07	91.66	73.42	33.3233	84.7167	1.3461	6.31e-05	0.000176486	S	protein conserved in bacteria	-	ko:K09986
SMc03134		9.34	10.68	8.96	27.49	29.48	33.89	9.66	30.2867	1.6486	6.31e-05	0.000176486	EG	EamA-like transporter family	-	ko:K15270
SMc02317		5.71	8.59	6.96	20.52	20.73	35.77	7.08667	25.6733	1.8571	6.36e-05	0.000177762	S	Domain of Unknown Function (DUF930)	-	-
SMc01041	dusB	34.65	32.68	25.42	77.45	84.75	78.44	30.9167	80.2133	1.3755	6.37e-05	0.000177762	J	Catalyzes the synthesis of 5,6-dihydrouridine (D), a modified base found in the D-loop of most tRNAs, via the reduction of the C5-C6 double bond in target uridines	-	ko:K05540
SMb20416	ugpB	77.46	75.4	79.75	195.56	181.49	171.32	77.5367	182.79	1.2372	6.44e-05	0.000179723	G	ABC-type sugar transport system, periplasmic component	-	ko:K05813
SMc03820	mtrA	87.98	82.17	81.89	201.76	183.33	202.07	84.0133	195.72	1.2201	6.48e-05	0.000180682	KT	Response regulators consisting of a CheY-like receiver domain and a winged-helix DNA-binding domain	-	-
SMc03184	phaG	2.98	3.39	2.68	14.33	9.21	16.32	3.01667	13.2867	2.139	6.52e-05	0.000181474	P	Multisubunit Na H antiporter, MnhG subunit	-	ko:K05564
SMc00231	glmS	54.89	42.71	39.74	120.43	111.93	112.96	45.78	115.107	1.3302	6.66e-05	0.000185532	M	Catalyzes the first step in hexosamine metabolism, converting fructose-6P into glucosamine-6P using glutamine as a nitrogen source	GO:0003674,GO:0003824,GO:0004360,GO:0005575,GO:0005622,GO:0005623,GO:0005737,GO:0005829,GO:0006002,GO:0006040,GO:0006047,GO:0006139,GO:0006464,GO:0006486,GO:0006487,GO:0006725,GO:0006793,GO:0006796,GO:0006807,GO:0008150,GO:0008152,GO:0008483,GO:0009058,GO:0009059,GO:0009100,GO:0009101,GO:0009225,GO:0009987,GO:0016740,GO:0016769,GO:0019538,GO:0019637,GO:0034641,GO:0034645,GO:0036211,GO:0043170,GO:…	ko:K00820
SMc04308		18.17	16.54	14.32	47.24	45.14	44.56	16.3433	45.6467	1.4818	6.67e-05	0.00018564	I	Alpha beta hydrolase	-	ko:K00433
SMa6457		2.34	2.86	3.08	10.46	13.36	13.18	2.76	12.3333	2.1598	6.91e-05	0.000192106	#N/A	#N/A	#N/A	#N/A
SMc00553	MA20_27940	100.56	96.1	87.11	233.12	219.72	204.58	94.59	219.14	1.2121	6.93e-05	0.00019271	IQ	Belongs to the short-chain dehydrogenases reductases (SDR) family	GO:0003674,GO:0003824,GO:0005575,GO:0005622,GO:0005623,GO:0008150,GO:0008152,GO:0009056,GO:0016491,GO:0044464,GO:0055114,GO:0071704,GO:1901575	-
SMb20041		4.15	5.47	7.23	20.52	20.27	20.71	5.61667	20.5	1.8678	6.98e-05	0.000193865	-	-	-	-
SMb20278		20.63	17.19	18.33	50.34	66.33	42.04	18.7167	52.9033	1.499	7.01e-05	0.000194541	S	Carboxymuconolactone decarboxylase family	-	-
SMa0622	fixS	0.91	1.82	1.2	9.29	5.07	10.04	1.31	8.13333	2.6343	7.07e-05	0.000196016	P	cytochrome oxidase maturation protein	-	-
SMb21336		6.1	4.3	8.16	17.04	21.19	33.89	6.18667	24.04	1.9582	7.07e-05	0.000196109	K	helix_turn_helix, arabinose operon control protein	-	ko:K07506
SMa0241	MA20_27225	5.71	6.64	6.29	21.3	21.65	20.71	6.21333	21.22	1.772	7.65e-05	0.000211521	GM	COG0451 Nucleoside-diphosphate-sugar epimerases	-	ko:K22025
SMc04018	MA20_07595	175.3	179.96	160.56	393.05	366.66	395.35	171.94	385.02	1.163	7.69e-05	0.000212441	F	Belongs to the 5'-nucleotidase family	GO:0003674,GO:0003824,GO:0005575,GO:0005622,GO:0005623,GO:0005634,GO:0005654,GO:0005737,GO:0005829,GO:0005886,GO:0006139,GO:0006163,GO:0006195,GO:0006213,GO:0006259,GO:0006725,GO:0006732,GO:0006733,GO:0006753,GO:0006793,GO:0006796,GO:0006807,GO:0007155,GO:0007159,GO:0008150,GO:0008152,GO:0008252,GO:0008253,GO:0009056,GO:0009058,GO:0009116,GO:0009117,GO:0009164,GO:0009166,GO:0009987,GO:0016020,GO:…	ko:K01081,ko:K11751
SMc00060		12.59	10.16	8.43	33.69	33.63	28.24	10.3933	31.8533	1.6158	7.79e-05	0.000215052	M	Putative peptidoglycan binding domain	-	-
SMc02110	clpS	261.46	283.75	240.31	580.09	585.45	577.96	261.84	581.167	1.1503	8.05e-05	0.000221942	S	Involved in the modulation of the specificity of the ClpAP-mediated ATP-dependent protein degradation	-	ko:K06891
SMc02064	serS	81.88	75.27	63.69	177.75	180.1	165.67	73.6133	174.507	1.2452	8.1e-05	0.000223113	J	Catalyzes the attachment of serine to tRNA(Ser). Is also able to aminoacylate tRNA(Sec) with serine, to form the misacylated tRNA L-seryl-tRNA(Sec), which will be further converted into selenocysteinyl-tRNA(Sec)	-	ko:K01875
SMc01496	smoE	333.09	343.26	342.14	732.28	711.2	936.91	339.497	793.463	1.2248	8.14e-05	0.000224141	G	ABC transporter substrate-binding protein	-	ko:K02027,ko:K10227
SMb20087		4.41	4.04	3.48	13.94	15.66	16.94	3.97667	15.5133	1.9639	8.18e-05	0.00022532	S	Cation transport regulator	-	-
SMc04391		6.75	5.99	4.95	19.36	19.35	23.22	5.89667	20.6433	1.8077	8.21e-05	0.000226014	IQ	KR domain	-	-
SMb21138	glnQ	3.63	5.08	4.42	13.55	15.66	22.59	4.37667	17.2667	1.9801	8.25e-05	0.000227065	E	ATPases associated with a variety of cellular activities	-	ko:K02028,ko:K09972,ko:K10010
SMc00653		9.21	8.99	11.64	33.69	30.4	28.24	9.94667	30.7767	1.6296	8.33e-05	0.000228889	T	Response regulator receiver domain	-	ko:K03413
SMa6537		19.46	14.58	18.06	50.73	43.76	52.09	17.3667	48.86	1.4923	8.42e-05	0.000231183	D	Antitoxin component of a toxin-antitoxin (TA) module	-	-
SMb21269		102.9	104.7	106.51	250.94	235.38	233.44	104.703	239.92	1.1962	8.5e-05	0.000233165	V	ABC transporter	-	ko:K02021
SMc02295		32.7	30.6	32.65	82.87	79.69	79.07	31.9833	80.5433	1.3324	8.51e-05	0.000233416	V	type I restriction-modification system specificity	-	ko:K01154
SMc00610	nudK	8.82	6.25	7.36	21.69	25.79	26.98	7.47667	24.82	1.731	8.72e-05	0.000239026	L	NTP pyrophosphohydrolases including oxidative damage repair enzymes	-	ko:K01515
SMb20251		2.34	2.73	4.01	14.33	17.5	8.16	3.02667	13.33	2.1389	8.76e-05	0.000240071	GM	ADP-glyceromanno-heptose 6-epimerase activity	-	-
SMc00616	perM	43.47	38.67	39.2	108.43	88.44	105.43	40.4467	100.767	1.3169	8.77e-05	0.000240071	S	permease	-	ko:K03548
SMa1587	exsH	14.01	13.93	10.7	33.3	38.23	42.67	12.88	38.0667	1.5634	8.78e-05	0.000240217	GQ	Glycosyl hydrolases family 16	-	ko:K20276
SMb21331		17.26	14.58	15.52	38.72	52.51	43.3	15.7867	44.8433	1.5062	9.04e-05	0.000247193	#N/A	#N/A	#N/A	#N/A
SMa1531	nuoC2	5.84	8.07	6.15	23.62	24.41	19.45	6.68667	22.4933	1.7501	9.06e-05	0.000247441	C	NDH-1 shuttles electrons from NADH, via FMN and iron- sulfur (Fe-S) centers, to quinones in the respiratory chain. The immediate electron acceptor for the enzyme in this species is believed to be ubiquinone. Couples the redox reaction to proton translocation (for every two electrons transferred, four hydrogen ions are translocated across the cytoplasmic membrane), and thus conserves the redox ene…	-	ko:K00332
SMc01644		39.58	33.99	42.95	93.33	100.88	101.03	38.84	98.4133	1.3413	9.19e-05	0.000250886	P	ABC transporter (Permease	-	ko:K02034
SMb20397		1.56	1.56	1.07	9.29	6.45	8.16	1.39667	7.96667	2.512	9.38e-05	0.000255656	C	PFAM 2Fe-2S iron-sulfur cluster binding domain, 2Fe-2S binding domain	-	ko:K13483
SMc01174	cysB	111.07	100.92	105.04	240.48	256.57	229.05	105.677	242.033	1.1955	9.46e-05	0.000257942	E	Cysteine synthase	GO:0000096,GO:0000097,GO:0003674,GO:0003824,GO:0004124,GO:0005488,GO:0005575,GO:0005622,GO:0005623,GO:0005737,GO:0006082,GO:0006520,GO:0006534,GO:0006535,GO:0006563,GO:0006790,GO:0006807,GO:0008144,GO:0008150,GO:0008152,GO:0008652,GO:0009058,GO:0009069,GO:0009070,GO:0009987,GO:0016053,GO:0016740,GO:0016765,GO:0019344,GO:0019752,GO:0019842,GO:0030170,GO:0036094,GO:0043167,GO:0043168,GO:0043436,GO:…	ko:K01738
SMb20980		5.71	5.08	4.01	1.94	2.3	1.88	4.93333	2.04	-1.274	9.62e-05	0.000261939	G	Trap-type c4-dicarboxylate transport system, small permease component	-	ko:K11689,ko:K21394
SMa1296	adhA	84.34	78.13	90.18	214.53	169.97	240.35	84.2167	208.283	1.3064	9.76e-05	0.000265712	S	Zn-dependent alcohol dehydrogenases	-	ko:K13953
SMa1084		132.61	132.95	133.4	316.38	264.86	373.38	132.987	318.207	1.2587	9.86e-05	0.000268197	G	Phosphoketolase	-	ko:K01621
SMc02179	cpdA	8.17	7.68	6.02	26.72	22.11	22.59	7.29	23.8067	1.7074	9.94e-05	0.000270118	S	Hydrolyzes cAMP to 5'-AMP. Plays an important regulatory role in modulating the intracellular concentration of cAMP, thereby influencing cAMP-dependent processes	-	ko:K03651
SMb21211	eptA	15.18	18.49	13.11	46.47	38.69	48.32	15.5933	44.4933	1.5127	0.000106045	0.000287877	S	membrane-associated, metal-dependent hydrolase	-	ko:K03760,ko:K19353
SMc00016	ispH	175.43	176.45	151.06	395.77	374.95	358.95	167.647	376.557	1.1674	0.000107436	0.000291526	IM	Catalyzes the conversion of 1-hydroxy-2-methyl-2-(E)- butenyl 4-diphosphate (HMBPP) into a mixture of isopentenyl diphosphate (IPP) and dimethylallyl diphosphate (DMAPP). Acts in the terminal step of the DOXP MEP pathway for isoprenoid precursor biosynthesis	-	ko:K03527
SMa0302		5.58	6.25	4.55	16.65	22.57	18.83	5.46	19.35	1.8254	0.000107579	0.000291784	E	Bacterial extracellular solute-binding proteins, family 5 Middle	-	ko:K02035
SMa1887		2.08	2.21	1.47	13.55	9.67	5.65	1.92	9.62333	2.3254	0.000109439	0.000296444	K	Bacterial regulatory proteins, tetR family	-	ko:K16137
SMb20022		6.62	6.9	6.56	23.62	21.19	21.34	6.69333	22.05	1.72	0.00011045	0.000299052	Q	Dienelactone hydrolase family	-	-
SMb20142		2.47	2.21	2.41	10.84	10.13	11.3	2.36333	10.7567	2.1863	0.000110676	0.000299533	EP	ABC-type dipeptide oligopeptide nickel transport systems, permease components	-	ko:K02034
SMc00588	gal	13.49	11.98	12.85	39.11	30.86	42.04	12.7733	37.3367	1.5475	0.00011403	0.000308343	S	dehydrogenases and related proteins	GO:0005575,GO:0005622,GO:0005623,GO:0005737,GO:0044424,GO:0044464	ko:K00035
SMa1536	nuoM3	3.11	3.65	3.88	14.72	14.74	12.55	3.54667	14.0033	1.9812	0.00011522	0.000311292	C	Oxidoreductase	-	ko:K00342
SMa0612		104.06	104.17	116.68	274.94	228.93	261.06	108.303	254.977	1.2353	0.000115221	0.000311292	C	Belongs to the heme-copper respiratory oxidase family	-	ko:K00404
SMa0307		18.56	17.58	18.2	45.7	48.83	53.34	18.1133	49.29	1.4442	0.000115575	0.000312002	K	transcriptional regulator	-	-
SMa2353		7.79	9.38	10.3	26.33	27.64	32.63	9.15667	28.8667	1.6565	0.000115584	0.000312002	C	Aerobic-type carbon monoxide dehydrogenase, large subunit CoxL	-	ko:K11177
SMc00247	pcs	27.51	23.44	24.22	65.83	58.96	71.54	25.0567	65.4433	1.3851	0.000115732	0.000312267	I	Condenses choline with CDP-diglyceride to produce phosphatidylcholine and CMP	GO:0003674,GO:0003824,GO:0005488,GO:0005515,GO:0006629,GO:0006644,GO:0006793,GO:0006796,GO:0008150,GO:0008152,GO:0008610,GO:0008654,GO:0009058,GO:0009987,GO:0016740,GO:0016772,GO:0016780,GO:0019637,GO:0042802,GO:0044237,GO:0044238,GO:0044249,GO:0044255,GO:0050520,GO:0071704,GO:0090407,GO:1901576	ko:K01004
SMb21260	gsiA1	99.91	105.22	100.35	231.19	263.94	213.36	101.827	236.163	1.2137	0.000116272	0.000313587	P	Belongs to the ABC transporter superfamily	-	ko:K02031,ko:K02032,ko:K10823,ko:K13896,ko:K15583
SMc00796		10.51	8.72	14.45	35.63	37.31	31.38	11.2267	34.7733	1.6311	0.000117544	0.00031688	#N/A	#N/A	#N/A	#N/A
SMc02869	smoK	41.78	46.88	45.89	95.26	112.39	133.04	44.85	113.563	1.3403	0.000117909	0.000317725	P	Belongs to the ABC transporter superfamily	-	ko:K10111
SMc03835	ligT	99.65	103.13	97.28	232.74	222.48	224.66	100.02	226.627	1.18	0.000123928	0.000333223	J	Hydrolyzes RNA 2',3'-cyclic phosphodiester to an RNA 2'- phosphomonoester	-	ko:K01975
SMc02272	rkpG	76.69	58.6	59.28	155.67	154.77	157.51	64.8567	155.983	1.2661	0.000128072	0.000344007	H	Aminotransferase class I and II	-	-
SMc02872		19.46	19.79	23.68	49.18	53.43	75.3	20.9767	59.3033	1.4993	0.000128104	0.000344007	G	ABC transporter (Permease	-	ko:K10118
SMa2349		1.69	4.04	2.41	12.39	10.59	13.81	2.71333	12.2633	2.1762	0.00013044	0.000350129	C	[2Fe-2S] binding domain	-	ko:K13483
SMb20710		7.53	8.85	6.69	20.52	29.48	25.1	7.69	25.0333	1.7028	0.00013263	0.000355853	I	NAD-binding of NADP-dependent 3-hydroxyisobutyrate dehydrogenase	-	-
SMc00880	fabG1	109.9	151.44	143.44	322.19	299.4	377.15	134.927	332.913	1.303	0.000135456	0.000362853	IQ	reductase	-	ko:K22185,ko:K22215
SMb21379		54.11	57.82	54.73	120.43	157.53	127.39	55.5533	135.117	1.2823	0.000135472	0.000362853	S	Domain of unknown function (DUF427)	-	-
SMb20141		4.93	4.95	5.49	18.98	14.74	21.34	5.12333	18.3533	1.8409	0.000136717	0.000365873	P	Belongs to the ABC transporter superfamily	-	ko:K02031,ko:K02032,ko:K10823,ko:K13896,ko:K15583
SMc03875	fdxA	112.63	98.31	90.85	209.5	240.44	256.04	100.597	235.327	1.2261	0.000136954	0.000366349	C	Ferredoxins are iron-sulfur proteins that transfer electrons in a wide variety of metabolic reactions	-	ko:K05524
SMc02178		7.27	14.45	5.89	39.11	43.3	55.22	9.20333	45.8767	2.3175	0.000141626	0.000378522	S	Sel1-like repeats.	-	ko:K07126
SMa0707		1.56	1.04	1.07	8.91	8.29	4.39	1.22333	7.19667	2.5565	0.000143149	0.000382428	EM	Dihydrodipicolinate synthetase family	-	ko:K01714
SMb21333		5.06	4.82	5.22	16.65	17.04	20.08	5.03333	17.9233	1.8323	0.000143506	0.000383217	#N/A	#N/A	#N/A	#N/A
SMa0740		6.36	4.95	5.49	3.49	3.22	1.26	5.6	2.65667	-1.0758	0.000145646	0.000388764	#N/A	#N/A	#N/A	#N/A
SMc00948	glnA	390.44	331.93	328.09	784.95	771.54	756.18	350.153	770.89	1.1385	0.000147163	0.000392477	E	glutamine synthetase	-	ko:K01915
SMc00571	fabD	153.24	123.45	109.72	331.87	286.51	294.31	128.803	304.23	1.24	0.000148201	0.000395076	I	malonyl CoA-acyl carrier protein transacylase	GO:0003674,GO:0003824,GO:0004312,GO:0004314,GO:0005575,GO:0005622,GO:0005623,GO:0005737,GO:0005829,GO:0006082,GO:0006629,GO:0006631,GO:0006633,GO:0008150,GO:0008152,GO:0008610,GO:0009058,GO:0009987,GO:0016053,GO:0016417,GO:0016419,GO:0016420,GO:0016740,GO:0016746,GO:0016747,GO:0019752,GO:0032787,GO:0043436,GO:0044237,GO:0044238,GO:0044249,GO:0044255,GO:0044281,GO:0044283,GO:0044424,GO:0044444,GO:…	ko:K00645
SMb21525		28.03	30.6	33.72	83.26	71.86	80.95	30.7833	78.69	1.354	0.000148647	0.000396094	K	helix_turn_helix gluconate operon transcriptional repressor	-	ko:K00375
SMc02833	mepA	17	17.45	17.66	44.15	49.29	47.69	17.37	47.0433	1.4374	0.000153473	0.000408255	M	murein endopeptidase	-	ko:K07261
SMb20167	MA20_34470	55.02	60.81	61.68	139.8	145.56	135.55	59.17	140.303	1.2456	0.000153613	0.000408452	S	Sulfur oxidation protein SoxY	-	ko:K17226
SMa0360	tniA	14.92	17.45	13.78	44.53	43.3	39.53	15.3833	42.4533	1.4645	0.000163673	0.000434088	L	COG2801 Transposase and inactivated derivatives	-	ko:K07497
SMc00049	dskA	38.02	37.63	40.41	94.1	103.18	87.23	38.6867	94.8367	1.2936	0.000165219	0.000438002	T	DnaK suppressor protein	-	-
SMb21405	ycaC	4.15	7.68	4.68	1.94	1.84	4.39	5.50333	2.72333	-1.0149	0.00016737	0.00044328	Q	Isochorismatase family	-	-
SMc02396		8644.39	6090.82	6087.67	15968.5	16789.2	15771.3	6940.96	16176.3	1.2207	0.000167906	0.000444369	M	Forms passive diffusion pores that allow small molecular weight hydrophilic materials across the outer membrane	-	-
SMc01732	dapD	131.57	116.42	106.91	281.14	258.87	264.82	118.3	268.277	1.1813	0.000174565	0.000461207	E	Belongs to the transferase hexapeptide repeat family	-	ko:K00674
SMc00452	mutY	23.23	20.83	18.6	66.99	57.12	43.93	20.8867	56.0133	1.4232	0.000178055	0.000470228	L	A G-specific	GO:0003674,GO:0003824,GO:0006139,GO:0006259,GO:0006281,GO:0006284,GO:0006725,GO:0006807,GO:0006950,GO:0006974,GO:0008150,GO:0008152,GO:0009987,GO:0016787,GO:0033554,GO:0034641,GO:0043170,GO:0044237,GO:0044238,GO:0044260,GO:0046483,GO:0050896,GO:0051716,GO:0071704,GO:0090304,GO:1901360	ko:K03575
SMa2351		2.85	3	1.74	12.78	6.91	15.06	2.53	11.5833	2.1948	0.000184192	0.000485817	C	Molybdopterin dehydrogenase	-	ko:K11178
SMc03873	rpoH2	149.74	163.29	155.35	325.29	366.66	357.07	156.127	349.673	1.1633	0.000189077	0.000498069	K	sigma factors are initiation factors that promote the attachment of RNA polymerase to specific initiation sites and are then released	-	ko:K03089
SMc00702		46.06	38.94	41.08	102.62	98.57	103.54	42.0267	101.577	1.2732	0.00019217	0.000505788	S	Esterase-like activity of phytase	-	-
SMa1056	bigR	4.54	9.12	5.75	21.69	21.65	23.85	6.47	22.3967	1.7914	0.000195128	0.000513138	K	helix_turn_helix, Arsenical Resistance Operon Repressor	-	-
SMb20958	exoM	20.37	22.27	21.01	60.41	58.96	47.07	21.2167	55.48	1.3868	0.000199916	0.000525287	M	Glycosyl transferase family 2	GO:0005575,GO:0005623,GO:0005886,GO:0016020,GO:0044464,GO:0071944	ko:K16556
SMa0803		22.97	12.37	11.24	46.08	48.83	45.81	15.5267	46.9067	1.595	0.000200761	0.000527284	E	Part of the ABC transporter complex PotABCD involved in spermidine putrescine import. Responsible for energy coupling to the transport system	-	ko:K02052
SMc02610	glxB	48.4	39.85	36.39	106.49	111.01	89.74	41.5467	102.413	1.3016	0.000201853	0.000529928	F	Glutamine amidotransferase domain	-	ko:K22081
SMc02175		46.06	43.36	40.54	99.14	98.11	117.98	43.32	105.077	1.2783	0.000204889	0.000537672	K	Crp-like helix-turn-helix domain	-	ko:K10914
SMa1595		5.71	6.64	7.23	18.59	20.73	26.36	6.52667	21.8933	1.7461	0.000206939	0.000542592	#N/A	#N/A	#N/A	#N/A
SMa1639		2.47	3.26	2.01	10.46	9.67	13.81	2.58	11.3133	2.1326	0.000208354	0.000545845	L	Metal-sensitive transcriptional repressor	-	ko:K07807
SMa0149	greB	4.41	4.82	5.08	18.98	14.28	17.57	4.77	16.9433	1.8287	0.000210149	0.000550315	K	Transcription elongation factor	-	-
SMc01526	ddpB	25.82	20.57	23.28	67.38	58.5	55.22	23.2233	60.3667	1.3782	0.000213489	0.000558591	P	ABC-type dipeptide oligopeptide nickel transport systems, permease components	GO:0005575,GO:0005623,GO:0005886,GO:0016020,GO:0044464,GO:0071944	ko:K02033
SMb21264	redA	44.38	48.96	43.35	102.62	108.25	117.35	45.5633	109.407	1.2638	0.000214752	0.000561659	S	Glycosyltransferase family 28 C-terminal domain	-	-
SMa0246		3.11	1.43	2.27	6.97	12.44	13.18	2.27	10.8633	2.2587	0.000215727	0.000563972	K	Transcriptional regulator	-	-
SMc03987		25.56	24.74	21.14	58.47	63.11	61.5	23.8133	61.0267	1.3577	0.000218532	0.000571065	EGP	Major facilitator superfamily	-	-
SMc00581	surA	76.43	61.33	55.26	152.96	156.15	150.61	64.34	153.24	1.252	0.0002207	0.000576489	O	Parvulin-like peptidyl-prolyl isomerase	-	ko:K03771
SMb20894	gguA	33.74	31.38	31.98	83.26	77.38	77.81	32.3667	79.4833	1.2961	0.000221061	0.00057719	G	ABC transporter	-	ko:K10548
SMc01460		8.43	8.72	8.3	28.66	19.81	31.38	8.48333	26.6167	1.6496	0.000221326	0.000577639	S	Antioxidant protein with alkyl hydroperoxidase activity. Required for the reduction of the AhpC active site cysteine residues and for the regeneration of the AhpC enzyme activity	-	-
SMc03101	coxS	45.16	48.44	47.63	114.62	99.95	128.02	47.0767	114.197	1.2784	0.000225132	0.000586834	C	carbon monoxide dehydrogenase	-	ko:K03518
SMb21242	lpcC	9.34	10.16	8.43	25.17	29.02	30.12	9.31	28.1033	1.5939	0.000227412	0.000592528	M	Glycosyl transferases group 1	-	-
SMb21462		3.76	3.26	4.15	10.46	17.5	15.69	3.72333	14.55	1.9664	0.000230459	0.000599964	G	pfkB family carbohydrate kinase	-	-
SMa0967		12.85	10.29	12.31	28.27	38.69	37.02	11.8167	34.66	1.5524	0.00023628	0.000614347	S	Nucleotidyltransferase	-	-
SMc00237	moaC	18.04	11.2	15.92	56.15	37.77	38.28	15.0533	44.0667	1.5496	0.000240137	0.000623334	H	Catalyzes the conversion of (8S)-3',8-cyclo-7,8- dihydroguanosine 5'-triphosphate to cyclic pyranopterin monophosphate (cPMP)	-	ko:K03637
SMc02097	uppS	87.72	91.54	74.26	197.11	190.24	192.65	84.5067	193.333	1.194	0.000240356	0.000623644	I	Catalyzes the condensation of isopentenyl diphosphate (IPP) with allylic pyrophosphates generating different type of terpenoids	GO:0002094,GO:0003674,GO:0003824,GO:0004659,GO:0005575,GO:0005622,GO:0005623,GO:0005737,GO:0005829,GO:0006066,GO:0006629,GO:0006720,GO:0008150,GO:0008152,GO:0008299,GO:0008610,GO:0009058,GO:0009987,GO:0016093,GO:0016094,GO:0016740,GO:0016765,GO:0044237,GO:0044238,GO:0044249,GO:0044255,GO:0044281,GO:0044283,GO:0044424,GO:0044444,GO:0044464,GO:0046165,GO:0071704,GO:1901576,GO:1901615,GO:1901617	ko:K00806
SMa1259		20.24	20.31	21.68	63.51	42.84	61.5	20.7433	55.95	1.4315	0.000245928	0.00063671	O	Belongs to the heme-copper respiratory oxidase family	-	-
SMa1155		100.56	81.78	92.46	230.02	191.62	220.27	91.6	213.97	1.224	0.000246329	0.000637105	P	Cation transporter/ATPase, N-terminus	-	ko:K01537
SMb20361		33.48	40.63	35.32	89.45	85.22	94.76	36.4767	89.81	1.2999	0.000246364	0.000637105	P	Ion channel	-	ko:K10716
SMc03895	pyc	275.73	255.88	246.07	559.96	546.76	573.57	259.227	560.097	1.1115	0.00024676	0.000637864	C	Catalyzes a 2-step reaction, involving the ATP-dependent carboxylation of the covalently attached biotin in the first step and the transfer of the carboxyl group to pyruvate in the second	-	ko:K01958
SMa0937		6.23	6.64	4.15	17.04	23.03	18.2	5.67333	19.4233	1.7755	0.000247814	0.000640324	M	Mechanosensitive ion channel	-	ko:K22044
SMb20023	oplA	50.73	45.84	45.76	110.37	109.17	117.35	47.4433	112.297	1.243	0.000248045	0.000640654	EQ	N-methylhydantoinase A acetone carboxylase, beta subunit	-	ko:K01469
SMc01445		2.6	1.95	2.14	10.07	9.21	10.67	2.23	9.98333	2.1625	0.000248841	0.000642178	-	-	-	-
SMa1927		42.17	35.29	33.05	85.97	85.68	102.29	36.8367	91.3133	1.3097	0.000249856	0.000644529	S	protein conserved in bacteria	-	-
SMb21588	ytfR	3.5	2.73	3.88	12	11.98	16.32	3.37	13.4333	1.995	0.00025005	0.000644762	G	ABC transporter	-	ko:K02056,ko:K10441,ko:K17210
SMc01517		4.28	4.95	5.62	14.72	17.04	21.34	4.95	17.7	1.8382	0.000250732	0.000645985	-	-	-	-
SMa1558	cheA2	6.62	7.81	6.29	19.75	22.11	25.1	6.90667	22.32	1.6923	0.000255776	0.000658707	NT	Histidine kinase	GO:0005575,GO:0005622,GO:0005623,GO:0005737,GO:0044424,GO:0044464	ko:K03407,ko:K13490
SMb20073		6.62	8.46	6.56	27.88	18.89	22.59	7.21333	23.12	1.6804	0.000259062	0.000666895	IQ	Dehydrogenases with different specificities (related to short-chain alcohol dehydrogenases)	-	-
SMc02567	coaA	151.43	147.41	142.5	330.32	310.92	327.57	147.113	322.937	1.1343	0.000261602	0.000673153	F	Pantothenic acid kinase	GO:0003674,GO:0003824,GO:0004594,GO:0005575,GO:0005622,GO:0005623,GO:0005737,GO:0005829,GO:0006139,GO:0006163,GO:0006164,GO:0006725,GO:0006732,GO:0006753,GO:0006793,GO:0006796,GO:0006807,GO:0008150,GO:0008152,GO:0009058,GO:0009108,GO:0009117,GO:0009150,GO:0009152,GO:0009165,GO:0009259,GO:0009260,GO:0009987,GO:0015936,GO:0015937,GO:0016301,GO:0016310,GO:0016740,GO:0016772,GO:0016773,GO:0018130,GO:…	ko:K00867
SMc02034		8.3	8.33	7.49	22.46	21.19	33.26	8.04	25.6367	1.6729	0.000263827	0.000678319	IQ	Short-chain dehydrogenase reductase SDR	-	-
SMb20348		9.08	7.16	8.03	26.33	33.63	16.94	8.09	25.6333	1.6638	0.000268482	0.000689148	S	Phosphogluconate dehydrogenase (decarboxylating) C-term	-	-
SMa2359	ytnM	3.5	2.73	4.68	17.04	11.52	13.81	3.63667	14.1233	1.9574	0.000274348	0.000703623	S	membrane transporter protein	-	ko:K07090
SMc04173		22.84	24.61	22.88	55.38	60.8	64.01	23.4433	60.0633	1.3573	0.000276914	0.000709328	H	RibD C-terminal domain	-	-
SMc01777	ribH	20.76	13.28	14.18	41.82	52.51	41.42	16.0733	45.25	1.4932	0.000289329	0.000739304	H	Catalyzes the formation of 6,7-dimethyl-8- ribityllumazine by condensation of 5-amino-6-(D- ribitylamino)uracil with 3,4-dihydroxy-2-butanone 4-phosphate. This is the penultimate step in the biosynthesis of riboflavin	GO:0000906,GO:0003674,GO:0003824,GO:0005575,GO:0005622,GO:0005623,GO:0005737,GO:0005829,GO:0006766,GO:0006767,GO:0006771,GO:0006807,GO:0008150,GO:0008152,GO:0009058,GO:0009110,GO:0009231,GO:0009987,GO:0016740,GO:0016765,GO:0017144,GO:0018130,GO:0034641,GO:0042364,GO:0042726,GO:0042727,GO:0044237,GO:0044249,GO:0044271,GO:0044281,GO:0044283,GO:0044424,GO:0044444,GO:0044464,GO:0046483,GO:0071704,GO:…	ko:K00794
SMb21565	MA20_01595	5.32	4.04	3.48	12.78	19.35	15.06	4.28	15.73	1.8778	0.00028963	0.00073977	S	Bacterial protein of unknown function (DUF899)	-	-
SMb23125		2.98	3.26	3.35	0.77	0.92	0.63	3.19667	0.773333	-2.0474	0.000289882	0.000739806	#N/A	#N/A	#N/A	#N/A
SMc00395	pfs	14.66	11.46	10.44	41.44	29.02	35.14	12.1867	35.2	1.5303	0.000295037	0.000752344	F	Phosphorylase superfamily	-	ko:K01243
SMb21262		19.85	17.58	20.2	61.18	48.83	43.3	19.21	51.1033	1.4116	0.000297961	0.000759178	EP	ABC-type dipeptide oligopeptide nickel transport systems, permease components	-	ko:K02033
SMc01773	ribE	97.84	84.12	78.28	199.82	196.69	195.79	86.7467	197.433	1.1865	0.000311723	0.000793916	H	riboflavin synthase, alpha	GO:0003674,GO:0003824,GO:0004746,GO:0005575,GO:0005622,GO:0005623,GO:0005737,GO:0005829,GO:0006766,GO:0006767,GO:0006771,GO:0006807,GO:0008150,GO:0008152,GO:0009058,GO:0009110,GO:0009231,GO:0009987,GO:0016740,GO:0016765,GO:0017144,GO:0018130,GO:0034641,GO:0042364,GO:0042726,GO:0042727,GO:0044237,GO:0044249,GO:0044271,GO:0044281,GO:0044283,GO:0044424,GO:0044444,GO:0044464,GO:0046483,GO:0071704,GO:…	ko:K00793
SMc02753	manX	57.48	47.79	44.96	113.08	137.73	111.07	50.0767	120.627	1.2683	0.000314847	0.000801546	G	Phosphotransferase system, mannose fructose-specific component IIA	-	ko:K02793
SMc02794	hemE	34.65	33.21	29.17	93.33	73.7	73.42	32.3433	80.15	1.3092	0.000315882	0.000803523	H	Catalyzes the decarboxylation of four acetate groups of uroporphyrinogen-III to yield coproporphyrinogen-III	GO:0003674,GO:0003824,GO:0004853,GO:0005575,GO:0005622,GO:0005623,GO:0005737,GO:0005829,GO:0006725,GO:0006778,GO:0006779,GO:0006783,GO:0006807,GO:0008150,GO:0008152,GO:0009058,GO:0009987,GO:0016829,GO:0016830,GO:0016831,GO:0018130,GO:0019438,GO:0033013,GO:0033014,GO:0034641,GO:0042168,GO:0042440,GO:0044237,GO:0044249,GO:0044271,GO:0044424,GO:0044444,GO:0044464,GO:0046148,GO:0046483,GO:0051186,GO:…	ko:K01599
SMc00658		6.75	6.25	8.96	19.75	23.03	28.87	7.32	23.8833	1.7061	0.00032567	0.000827406	K	Autoinducer binding domain	-	-
SMc02140	phoB	31.01	27.09	26.36	65.44	72.78	72.17	28.1533	70.13	1.3167	0.000329311	0.000835974	K	phosphate regulon transcriptional regulatory protein PhoB	GO:0005575,GO:0005622,GO:0005623,GO:0005737,GO:0044424,GO:0044464	ko:K07657
SMa1452		41.78	57.95	50.85	101.85	142.33	139.31	50.1933	127.83	1.3487	0.000331546	0.000841304	IQ	Belongs to the short-chain dehydrogenases reductases (SDR) family	-	-
SMc02871		12.07	10.42	13.65	39.11	27.64	38.28	12.0467	35.01	1.5391	0.000334432	0.000847935	G	ABC transporter (Permease	-	ko:K02026,ko:K10119
SMc02111	MA20_36110	1477.54	1519.39	1446.29	3322.96	2889.48	3348.54	1481.07	3186.99	1.1056	0.000346228	0.000876415	S	Phasin protein	-	-
SMb20038		2.85	5.21	5.22	1.55	2.3	1.88	4.42667	1.91	-1.2126	0.000350219	0.000885799	#N/A	#N/A	#N/A	#N/A
SMb20551		38.67	49.35	41.75	103.01	94.43	123.62	43.2567	107.02	1.3069	0.000352883	0.000891811	S	Protein of unknown function (DUF982)	-	-
SMc01168	aldR	9.86	10.68	10.04	27.49	28.56	33.26	10.1933	29.77	1.5462	0.000353634	0.000893345	K	Transcriptional regulator	-	ko:K03719
SMc03931	soxA1	79.41	71.23	66.63	183.17	164.44	152.49	72.4233	166.7	1.2027	0.000356325	0.000899779	E	Belongs to the GcvT family	GO:0005575,GO:0005622,GO:0005623,GO:0005737,GO:0044424,GO:0044464	ko:K00302
SMc02577	hslU	576.51	608.77	563.72	1168.71	1260.26	1308.42	583	1245.8	1.0955	0.000359852	0.000907949	O	this subunit has chaperone activity. The binding of ATP and its subsequent hydrolysis by HslU are essential for unfolding of protein substrates subsequently hydrolyzed by HslV. HslU recognizes the N-terminal part of its protein substrates and unfolds these before they are guided to HslV for hydrolysis	-	ko:K03667
SMc03024	flgF	4.02	4.3	4.01	2.32	0.92	1.88	4.11	1.70667	-1.268	0.00036639	0.000922947	N	Belongs to the flagella basal body rod proteins family	-	ko:K02391,ko:K02392
SMa1406	ttuD	4.41	5.6	3.61	14.33	18.89	15.06	4.54	16.0933	1.8257	0.000376458	0.000947541	G	MOFRL family	-	ko:K11529
SMc02562	pckA	259.38	257.18	216.76	644.77	427	767.48	244.44	613.083	1.3266	0.000377133	0.000948472	C	Involved in the gluconeogenesis. Catalyzes the conversion of oxaloacetate (OAA) to phosphoenolpyruvate (PEP) through direct phosphoryl transfer between the nucleoside triphosphate and OAA	GO:0003674,GO:0003824,GO:0004611,GO:0004612,GO:0005575,GO:0005622,GO:0005623,GO:0005737,GO:0005829,GO:0005975,GO:0005996,GO:0006006,GO:0006094,GO:0008150,GO:0008152,GO:0009058,GO:0016051,GO:0016829,GO:0016830,GO:0016831,GO:0019318,GO:0019319,GO:0044238,GO:0044281,GO:0044283,GO:0044424,GO:0044444,GO:0044464,GO:0046364,GO:0071704,GO:1901576	ko:K01610
SMb21535		5.71	4.04	5.89	15.88	18.42	19.45	5.21333	17.9167	1.781	0.000377983	0.000950225	K	LysR substrate binding domain	-	-
SMc04092		120.54	159.13	147.72	289.66	350.99	374.64	142.463	338.43	1.2483	0.000394979	0.000990553	S	Protein of unknown function (DUF1674)	-	-
SMb21189	lgtA	5.32	3.78	6.02	17.04	17.5	17.57	5.04	17.37	1.7851	0.000403391	0.00101083	M	Glycosyltransferase like family 2	-	-
SMb21681		3.11	3.39	3.88	0.77	2.3	0	3.46	1.02333	-1.7575	0.000404836	0.00101405	#N/A	#N/A	#N/A	#N/A
SMa5018		0	0	0	2.71	1.38	0.63	0.001	1.57333	10.6196	0.000405799	0.00101605	S	Protein of unknown function (DUF1427)	-	-
SMc02543	lysM	326.73	357.58	325.28	742.74	680.8	761.2	336.53	728.247	1.1137	0.000407175	0.00101909	S	protein containing LysM domain	-	-
SMa1323		8.95	9.25	8.7	24.4	29.48	25.73	8.96667	26.5367	1.5653	0.000407634	0.00101982	-	-	-	-
SMc00515	MA20_09400	45.67	38.02	43.08	98.75	100.42	103.54	42.2567	100.903	1.2557	0.000408149	0.0010207	S	AAA domain (dynein-related subfamily)	-	-
SMa1053		8.82	8.99	8.3	20.91	29.48	28.87	8.70333	26.42	1.602	0.000412441	0.00103102	S	transporter component	-	ko:K07112
SMc01102	rmuC	120.15	144.28	129.52	287.72	278.22	331.34	131.317	299.093	1.1875	0.000416067	0.00103925	S	protein conserved in bacteria	-	ko:K09760
SMb20769		8.04	9.25	7.23	18.98	26.72	31.38	8.17333	25.6933	1.6524	0.000417751	0.00104304	S	Tripartite tricarboxylate transporter TctA family	-	ko:K07793
SMc01980	malK	4.8	5.47	6.15	16.26	19.35	19.45	5.47333	18.3533	1.7456	0.000421053	0.00105086	E	Belongs to the ABC transporter superfamily	-	ko:K10112
SMc02277		15.44	16.8	16.32	38.34	39.61	55.85	16.1867	44.6	1.4622	0.000428582	0.00106836	#N/A	#N/A	#N/A	#N/A
SMc01101	def	27.12	20.18	16.99	60.41	53.43	55.85	21.43	56.5633	1.4002	0.000442222	0.00110016	J	Removes the formyl group from the N-terminal Met of newly synthesized proteins. Requires at least a dipeptide for an efficient rate of reaction. N-terminal L-methionine is a prerequisite for activity but the enzyme has broad specificity at other positions	GO:0003674,GO:0003824,GO:0006464,GO:0006807,GO:0008150,GO:0008152,GO:0009987,GO:0016787,GO:0016810,GO:0016811,GO:0018193,GO:0018206,GO:0019538,GO:0031365,GO:0036211,GO:0042586,GO:0043170,GO:0043412,GO:0043686,GO:0044237,GO:0044238,GO:0044260,GO:0044267,GO:0071704,GO:1901564	ko:K01450,ko:K01462
SMc00512		13.88	12.89	10.3	41.82	32.7	29.49	12.3567	34.67	1.4884	0.000447112	0.00111103	EQ	peptidase	-	ko:K01266
SMc02770	phaZ	225.13	207.44	211.81	463.53	504.84	436.14	214.793	468.17	1.1241	0.000447125	0.00111103	I	PHB depolymerase	-	ko:K05973
SMb20833		8.82	5.6	8.03	20.14	20.73	32.63	7.48333	24.5	1.711	0.000453541	0.00112607	GM	ABC-2 type transporter	-	ko:K09688
SMb20288		16.48	17.84	14.05	42.21	41	45.81	16.1233	43.0067	1.4154	0.000463869	0.0011508	F	Amidohydrolase family	-	-
SMc01013		30.88	29.43	27.3	63.9	73.24	79.7	29.2033	72.28	1.3075	0.000478556	0.00118534	S	Conserved protein domain typically associated with flavoprotein oxygenases, DIM6 NTAB family	-	-
SMb20815		63.58	64.46	58.34	136.31	146.94	141.2	62.1267	141.483	1.1873	0.000480771	0.00118988	M	protein involved in outer membrane biogenesis	-	ko:K07289
SMa2045		1.17	0.91	0.94	6.58	5.53	5.65	1.00667	5.92	2.556	0.000487899	0.00120704	L	Transposase and inactivated	-	ko:K07494
SMc01550		30.75	28.13	26.89	68.16	67.71	74.68	28.59	70.1833	1.2956	0.00048947	0.00120996	E	Glyoxalase/Bleomycin resistance protein/Dioxygenase superfamily	-	-
SMc00341		20.5	17.45	19.54	47.63	47.9	53.97	19.1633	49.8333	1.3788	0.000496258	0.00122626	-	-	-	-
SMb21157		10.12	10.55	9.1	29.43	24.87	32	9.92333	28.7667	1.5355	0.000499263	0.00123319	J	Endoribonuclease L-PSP	-	-
SMb20442	siaP	42.3	33.47	42.82	83.65	99.49	112.96	39.53	98.7	1.3201	0.000505286	0.00124708	G	TRAP-type C4-dicarboxylate transport system, periplasmic component	-	-
SMa2357		14.14	15.24	14.58	37.18	35.47	47.69	14.6533	40.1133	1.4529	0.000507767	0.00125271	T	Adenylate cyclase	-	ko:K01768
SMc02700	pcnB	26.08	22.4	20.2	56.15	60.34	57.11	22.8933	57.8667	1.3378	0.000508353	0.00125366	J	PolyA polymerase	-	ko:K00970,ko:K00974
SMc01809	metY	43.86	35.81	38.13	103.78	90.74	87.86	39.2667	94.1267	1.2613	0.000510641	0.0012588	E	O-acetylhomoserine	GO:0000096,GO:0000097,GO:0003674,GO:0003824,GO:0003961,GO:0004124,GO:0006082,GO:0006520,GO:0006534,GO:0006535,GO:0006555,GO:0006563,GO:0006790,GO:0006807,GO:0008150,GO:0008152,GO:0008652,GO:0009058,GO:0009066,GO:0009067,GO:0009069,GO:0009070,GO:0009086,GO:0009987,GO:0016053,GO:0016740,GO:0016765,GO:0017144,GO:0019344,GO:0019752,GO:0043436,GO:0044237,GO:0044238,GO:0044249,GO:0044272,GO:0044281,GO:…	ko:K01738,ko:K01740
SMb20891	MA20_08220	26.21	23.05	26.63	58.86	71.86	60.24	25.2967	63.6533	1.3313	0.000522806	0.00128828	C	belongs to the aldehyde dehydrogenase family	-	ko:K22187
[truncated: 530 more rows]
