# Supplementary material for: Dual RNA-Seq Analysis Pinpoints to a BalancedRegulation between Symbiosis and Immunity in the Medicago truncatula-Sinorhizobium meliloti Symbiotic Interactions
Source: Preprints.org preprint supplement (doi:10.20944/preprints202309.0662.v1), 2023-09-11
Supplement: Supplementary file 6 [file Table S3.xlsx]

## Sheet: Sheet1
Table S3: Nodule-associated NF signaling-related genes in M. truncatula
NF: nod factor; RLK, receptor-like protein kinase; LRR, leucine-rich repeat; CR, cysteine-rich
Gene ID (Mt20120830-LIPM）	Gene Name（Mt4.0v1-JCVI）	Gene Name	6 dpi- Log2FC	6 dpi- Log2FC	6 dpi- Log2FC	10 dpi- Log2FC	10 dpi- Log2FC	10 dpi- Log2FC	nad1-1 vs. WT (6 dpi)			nad1-1 vs. WT (10 dpi)
									Log2FC	PValue	FDR	Log2FC	PValue	FDR
Mt0010_00446	Medtr5g086130	MtLYK3	0.472068	-0.378512	0.514573	-3.70044	2.61891	0.485427	0.3049	0.746723	0.9804	0.0995	0.926185	0.949241
Mt0005_00682	Medtr5g019040	MtNFP	0.0543111	0.0967647	-0.783737	-0.862662	-0.457548	-0.686772	-0.2048	0.506299	0.9804	-0.6806	0.000801783	0.00266482
Mt0006_00755	Medtr3g072710	MtNSP2	0.815696	0.305249	-1.78778	-0.416787	0.0723508	0.222392	-0.1931	0.791164	0.9804	-0.0614	0.660679	0.852597
Mt0011_00459	Medtr7g085810	MtERN1	0.231238	-0.509303	0.144365	-0.802754	-0.730894	-1.40696	-0.0554	0.982507	0.999951	-0.9464	3.33402e-07	1.80753e-06
Mt0017_10456	Medtr3g415670	MtENOD11	-0.144162	-0.25747	-0.281735	-0.475963	0.297866	-0.207087	-0.2313	0.17361	0.815535	-0.1428	0.356842	0.555396
Mt0004_00313	Medtr1g056530	MtNF-YA1	-0.1734	-0.388437	-0.0652717	-0.616262	-0.152951	-0.265661	-0.2097	0.168569	0.806267	-0.3588	0.00115615	0.00372932
Mt0005_01074	Medtr5g026430	MtHMGR1	-0.842459	0.619552	2.55168	2.80735	2.05761	2.81173	0.6893	0.189241	0.843447	2.5411	2.58374e-23	4.09294e-22
Mt0042_10115	Medtr6g072020	SEH1H	0.130378	-0.29637	0.0193375	-0.267555	-0.151601	-0.251008	-0.0443	0.939647	0.999951	-0.224	0.0119951	0.0309618
Mt0010_01035	Medtr5g097260	NUP133-like	-0.0332392	-0.272751	-0.120654	-0.468725	-0.207696	-0.474436	-0.1406	0.418891	0.9804	-0.3859	0.0010816	0.00351254
Mt0002_10011	Medtr1g00669	NUP85-like	-0.0461447	-0.0595333	0.0545717	-0.150184	-0.0965148	-0.164021	-0.018	0.751708	0.9804	-0.1371	0.0381957	0.0866455
Mt0028_00160	Medtr8g020840	MtNSP1	0.304925	0.52564	0.230288	0.608447	0.310369	0.596013	0.3549	0.000565363	0.0142021	0.5076	0.00908073	0.0241539
Mt0023_10495	Medtr2g005870	MtDMI1	-0.090984	-1.18795	-0.59464	-2.20872	-1.88259	-2.77773	-0.5889	0.0214883	0.238014	-2.2381	2.59053e-22	3.93233e-21
Mt0012_10766	Medtr5g030920	MtDMI2	-0.0680088	-0.29158	-0.089998	-0.89813	-0.863151	-0.948823	-0.1488	0.341978	0.9804	-0.9028	2.55375e-37	7.26331e-36
Mt0010_00289	Medtr5g083030	MtPUB1	0.168542	-0.270861	-0.268618	-2.02775	-1.28532	-2.42403	-0.1257	0.573334	0.9804	-1.876	4.7882e-18	5.83853e-17
Mt0041_00009	Medtr8g043970	MtDMI3	-0.0809233	-0.24494	0.0838425	-0.46597	-0.620874	-0.533991	-0.0818	0.823258	0.981777	-0.5387	1.12099e-08	7.06526e-08
Mt0009_10577	Medtr8g097320	MtSYMREM1	-0.415234	-0.516088	-0.14629	-1.48687	-1.49465	-1.51249	-0.3668	0.0352429	0.330667	-1.4983	3.17005e-41	1.03294e-39
Mt0005_01094	Medtr5g026850	MtIPD3	-0.362243	-0.374363	-0.152076	-1.88573	-1.90219	-1.95714	-0.291	0.0822562	0.560393	-1.9132	3.23358e-97	3.82527e-95
Mt0011_10464	Medtr7g085150	Apyrase-like	-0.299345	-1.10452	-0.346919	-1.22913	-1.35463	-1.95883	-0.5375	0.0375764	0.344564	-1.4971	1.62688e-21	2.36857e-20
Mt0002_10566	Medtr1g021845	MtLYR2	-0.452638	0.283843	1.62832	1.44834	0.462625	0.781164	0.4668	0.174573	0.817554	0.8675	0.0015386	0.00483905
Mt0010_00422	Medtr5g085790	MtLYR4	0.869952	-0.749924	0.663823	1.14912	1.68093	1.22567	0.3503	0.211845	0.881616	1.3507	3.40498e-23	5.37192e-22
Mt0006_10523	Medtr3g078700	MtN23	-0.292778	-0.45572	0.771373	1.12238	0.63943	0.985726	-0.009	0.875852	0.991127	0.907	1.35149e-07	7.65036e-07
Mt0005_00683	Medtr5g019070	RLK	-0.307774	-0.946094	-0.000926884	0.191806	0.980588	0.295545	-0.4406	0.0780117	0.543793	0.4606	0.0475077	0.104753
Mt0014_00127	Medtr4g035835	IRE	-0.516493	-0.467254	0.00674659	-1.0036	-0.75454	-0.821571	-0.3263	0.0994086	0.624798	-0.8662	1.17733e-19	1.55631e-18
Mt0125_00034	Medtr8g461120	LRR RLK	-0.371625	-0.71378	-0.191786	-0.995979	-0.596545	-0.70227	-0.4046	0.0622611	0.475246	-0.7775	1.41426e-10	1.05346e-09
Mt0009_00747	Medtr8g101550	PLA2-ALPHA	0.43985	0.335903	-0.00773772	-0.162533	-0.198854	-0.261171	0.2365	0.0908438	0.593086	-0.2111	0.101407	0.200392
Mt0006_00443	Medtr3g079850	CR RLK	-0.60671	-0.827943	-0.350453	-2.69954	-2.62234	-2.92551	-0.581	0.00155859	0.0326378	-2.7477	3.91825e-190	2.13655e-187
Mt0048_00096	Medtr2g075010	LRR RLK	2.07229	1.05457	1.44049	2.19416	1.8577	1.83594	1.5626	1.39e-11	2.45e-09	1.961	1.39906e-41	4.59307e-40
Mt0003_00278	Medtr4g057260	BRL2	-0.946561	-1.42856	-1.00695	-2.86471	-3.0729	-3.66588	-1.0916	9.92e-05	0.00323288	-3.1709	4.51901e-31	1.02273e-29
