# Supplementary material for: Dual RNA-Seq Analysis Pinpoints to a BalancedRegulation between Symbiosis and Immunity in the Medicago truncatula-Sinorhizobium meliloti Symbiotic Interactions
Source: Preprints.org preprint supplement (doi:10.20944/preprints202309.0662.v1), 2023-09-11
Supplement: Supplementary file 7 [file Table S4.xlsx]

## Sheet: Sheet1
Table S3: Nodule-associated NF signaling-related genes in S. meliloti.
NF: nod factor.
Gene ID	Gene Name	6 dpi- Log2FC	6 dpi- Log2FC	6 dpi- Log2FC	10 dpi- Log2FC	10 dpi- Log2FC	10 dpi- Log2FC	nad1-1 vs. WT (6 dpi)			nad1-1 vs. WT (10 dpi)
								Log2FC	PValue	FDR	Log2FC	PValue	FDR
SMa0869	nodA	0.629411	1.38203	0.224362	1.81564	2.04514	2.70401	0.7967	0.0144018	0.0438904	2.1595	3.91896e-12	2.16938e-11
SMa0868	nodB	0.745587	1.00676	-0.147166	1.73171	1.75573	2.62499	0.5677	0.288737	0.479217	2.0393	1.42871e-06	4.90316e-06
SMa0866	nodC	0.580229	0.716751	0.0614279	1.70085	1.55094	2.05503	0.4668	0.358756	0.553348	1.773	1.89184e-08	7.91062e-08
SMa0840	nodD	-2.77826	-2.48795	-1.99541	-2.25208	-1.70595	-1.85825	-2.4045	5.20855e-61	1.6183e-58	-1.9312	3.57643e-132	6.35787e-130
SMa0853	nodE	0.178412	0.524223	0.125779	0.374897	0.51324	1.00131	0.2859	0.759776	0.871723	0.6465	0.377846	0.467619
SMa0852	nodF	0.300591	0.615	0.321801	0.847489	1.62277	1.36867	0.4149	0.626603	0.782655	1.2705	0.0521323	0.0856075
SMa0851	nodH	0.377779	0.729472	0.290094	1.49474	1.70401	1.89656	0.4745	0.207879	0.380609	1.6972	1.57303e-17	1.24048e-16
SMa0863	nodJ	0.532943	0.397344	0.276545	1.48695	1.15048	1.37617	0.4056	0.640535	0.79186	1.3508	0.00343747	0.00738533
SMa0849	syrM	-0.239829	0.441946	-0.412142	-0.507103	-0.10799	-0.188673	-0.0271	0.0359507	0.0947402	-0.2717	7.44033e-15	4.99393e-14
