# Supplementary material for: Dual RNA-Seq Analysis Pinpoints to a BalancedRegulation between Symbiosis and Immunity in the Medicago truncatula-Sinorhizobium meliloti Symbiotic Interactions
Source: Preprints.org preprint supplement (doi:10.20944/preprints202309.0662.v1), 2023-09-11
Supplement: Supplementary file 8 [file Table S5.xlsx]

## Sheet: Sheet1
Table S5：Candidate genes involved in the control of the nodule meristem and differentiation in M. truncatula
FI:fraction I
Gene ID (Mt20120830-LIPM）	Gene Name（Mt4.0v1-JCVI）	Gene Name	6 dpi- Log2FC	6 dpi- Log2FC	6 dpi- Log2FC	10 dpi- Log2FC	10 dpi- Log2FC	10 dpi- Log2FC	nad1-1 vs. WT (6 dpi)			nad1-1 vs. WT (10 dpi)			Zone	Description
									Log2FC	PValue	FDR	Log2FC	PValue	FDR
Mt0016_10327	Medtr2g098910	ACR4 crinkly4	0.473931	-0.304072	-0.62738	-0.0592659	0.593896	-0.68018	-0.1421	0.70276	0.9804	-0.0662	0.676016	0.858626	FI	crinkly4
Mt0011_00702	Medtr7g080460	BABY CRINKL Y4	-0.198845	-0.320278	0.586617	0.458119	0.412132	-0.209785	0.0137	0.763252	0.9804	0.244	0.357653	0.55641	FI	AP2-like ethylene-responsive transcription factor BBM1
Mt0004_01108	Medtr1g075610	CDKB2;2	0.00974498	-0.183142	-0.241123	-1.08696	-0.524244	-0.799528	-0.1382	0.505622	0.9804	-0.8145	3.46949e-09	2.28536e-08	FI	cyclin-dependent kinase B2;2
Mt0006_10070	Medtr3g088415	CYCA1;1	0.618809	-0.93713	-1.07664	-2.29041	-0.278535	-1.79395	-0.4204	0.251319	0.931589	-1.5394	1.64652e-06	8.21097e-06	FI	Cyclin A1;1
Mt0012_10340	Medtr5g040420	FEZ	-0.847997	-2.9386	-4.29768	0	0	-1.22239	-2.3759	0.0179486	0.212001	-2.3219	0.324099	0.515916	FI	NAC (No Apical Meristem) domain transcriptional regulator superfamily protein
Mt0043_10032	Medtr7g096530	LBD16	-0.349942	0.472634	-1.47897	-1.24286	1.25634	-0.253757	-0.3077	0.628067	0.9804	-0.2775	0.625954	0.830938	FI	lateral organ boundaries-domain 16
Mt0006_00996	Medtr3g067940	MtCCS52b	0.0655597	-0.103514	0.184652	-0.759345	-0.35996	-0.444599	0.0509	0.408788	0.9804	-0.5292	7.23038e-06	3.31093e-05	FI	FIZZY-related 3
Mt0011_10263	Medtr7g089360	MtPIN10	0.0205557	-0.245201	-0.576018	-0.0950472	0.626926	0.586732	-0.2805	0.154106	0.778282	0.3455	0.107295	0.210228	FI	IPR004776:Auxin efflux carrier
Mt0082_00042	Medtr6g069510	MtPIN4	-0.191141	0.0939831	-0.673599	-0.141691	0.0731179	-0.175408	-0.2458	0.338241	0.9804	-0.0833	0.304584	0.491327	FI	Auxin efflux carrier family protein
Mt0010_10219	Medtr5g081990	MtWOX5	0.59368	-0.0695409	-1.28307	0.0412227	0.878694	0.280901	-0.2526	0.650132	0.9804	0.3304	0.438947	0.648784	FI	WUSCHEL related homeobox 5
Mt0016_00349	Medtr2g098180	PLT2	0.321928	-0.242701	0.336525	-0.44151	-0.391191	-0.263034	0.1164	0.602105	0.9804	-0.3779	0.261224	0.436473	FI	IPR016177:DNA-binding, integrase-type
Mt0026_10342	Medtr7g074650	SCR,SGR1	0.82494	0.0289417	-1.33488	-0.579623	-0.10888	-0.578536	-0.1742	0.735505	0.9804	-0.4319	0.000200509	0.000737729	FI	Protein SCARECROW
Mt0005_10514	Medtr5g015490	SHR,SGR7	0.296795	-0.244169	-1.25	-0.223023	-0.0144512	-0.617024	-0.4146	0.191489	0.84774	-0.2795	0.0324052	0.0749919	FI	GRAS family transcription factor
Mt0004_01131	Medtr1g093350	SHY2	0.170841	1.83145	-2.11167	1.66621	2.05453	2.58207	0.1372	0.730586	0.9804	2.1737	1.52552e-11	1.23178e-10	FI	IPR003311:AUX/IAA protein
Mt0064_10015	Medtr4g007750	CDKB1;2	-0.335791	-0.0662396	-0.0851613	-0.71727	-0.271935	-0.377256	-0.1579	0.517876	0.9804	-0.4656	0.00326364	0.00959679	FI	Cell division control protein 2 homolog C
Mt0016_00146	Medtr2g102520	CYCA2;4	0.318873	0.0362786	0.187187	0.203048	0.309827	0.328844	0.1769	0.0593735	0.461747	0.2796	0.0729803	0.151689	FI	Cyclin A2;4
Mt0004_00313	Medtr1g056530	MtNF-YA1	-0.1734	-0.388437	-0.0652717	-0.616262	-0.152951	-0.265661	-0.2097	0.168569	0.806267	-0.3588	0.00115615	0.00372932	NA	IPR001289:CCAAT-binding transcription factor, subunit B
Mt0072_10022	Medtr2g462010	COBRA	0.436047	-0.128305	0.280894	0.238771	0.0483923	0.100915	0.2172	0.141685	0.75046	0.132	0.610854	0.816379	NA	COBRA-like extracellular glycosyl-phosphatidyl inositol-anchored protein family
Mt0009_10996	Medtr8g106150	MtCRE1	-0.0392468	-0.597934	-0.485978	-1.42975	-1.12238	-1.67251	-0.3688	0.0226343	0.246921	-1.3953	1.23913e-17	1.47941e-16	NA	CHASE domain containing histidine kinase protein
Mt0002_10081	Medtr1g008380	YUCCA	1.01792	-2.03342	-1.30633	-1.43528	-0.361508	-1.29546	-0.5091	0.396762	0.9804	-0.9955	0.0147115	0.037141	NA	Flavin-binding monooxygenase family protein
Mt0013_00342	Medtr3g463490	CDC6	-0.0551294	-0.515634	0.113024	-0.407045	0.0194774	-0.396842	-0.1286	0.712293	0.9804	-0.264	0.119454	0.230125	NA	Cell division control, Cdc6
Mt0027_00383	Medtr2g078640	HPY2	-0.194816	-0.0025557	-0.27322	-0.0334465	-0.111893	0.180342	-0.1546	0.570093	0.9804	0.0092	0.766732	0.897568	NA	RING/U-box superfamily protein
Mt0001_00606	Medtr4g122270	MCM2	-0.0256039	-0.23745	0.19176	-0.694075	0	-0.330123	-0.0239	0.880144	0.991823	-0.3553	0.0249678	0.0595535	NA	minichromosome maintenance (MCM2/3/5) family protein
Mt0001_11722	Medtr4g096700	MCM3	-0.234129	0.00550998	0.0542327	-0.684016	-0.169226	-0.616812	-0.0629	0.940655	0.999951	-0.4904	0.00027694	0.000995946	NA	Minichromosome maintenance (MCM2/3/5) family protein
Mt0003_10882	Medtr4g071090	MCM4	-0.272447	-0.146325	0.106539	-0.500854	-0.0465808	-0.526508	-0.1109	0.705397	0.9804	-0.3555	0.0164555	0.0410952	NA	Minichromosome maintenance (MCM2/3/5) family protein
Mt0001_10832	Medtr4g116870	MCM5	-0.358112	-0.0376675	0.204546	-0.773009	-0.340495	-0.423178	-0.0766	0.889386	0.994728	-0.5239	0.000380142	0.00133597	NA	Minichromosome maintenance (MCM2/3/5) family protein
Mt0009_10280	Medtr8g090000	MCM6	-0.250326	-0.108089	0.189441	-0.894246	-0.303738	-0.618703	-0.0656	0.931569	0.999951	-0.6134	8.21993e-05	0.0003208	NA	minichromosome maintenance (MCM2/3/5) family protein
Mt0002_10509	Medtr1g019770	ORC2	-0.107628	-0.0485568	-0.16587	-0.50851	0.015854	-0.00843684	-0.1043	0.772996	0.9804	-0.1723	0.253798	0.426865	NA	origin recognition complex second largest subunit 2
Mt0012_10352	Medtr5g040250	ORC6	0.0519946	-0.111683	0.246161	-0.219678	0.481406	-0.145541	0.0738	0.52904	0.9804	0.0456	0.962833	0.972919	NA	origin recognition complex protein 6
Mt0001_11374	Medtr4g102510	MtCCS52a	-0.210338	-0.745016	-0.0659097	-0.692376	-0.430538	-0.510374	-0.3317	0.108821	0.656655	-0.5499	3.02454e-09	2.00247e-08	NA	cell cycle switch protein 52 A2
Mt0064_00055	Medtr4g008860	MtEFD1	-0.154851	-0.269671	-0.841086	-1.57059	-1.26882	-1.06839	-0.4151	0.0361951	0.335844	-1.3134	5.07154e-20	6.84668e-19	NA	IPR016177:DNA-binding, integrase-type
Mt0012_10504	Medtr5g036480	MtRR4	-0.339795	-0.143437	-0.841923	-0.952587	-0.111046	-0.466846	-0.4399	0.0727336	0.521437	-0.5394	0.00324761	0.00955206	NA	response regulator 4
Mt0006_00055	Medtr3g088630	ATRR3,ARR8,RR3	-0.345497	-0.180694	-0.260384	-0.573986	-0.0583104	-0.259926	-0.2605	0.106632	0.649678	-0.303	0.00293513	0.00870488	NA	IPR011006:CheY-like superfamily
Mt0055_10053	Medtr2g039410	CKX	0.403281	-0.45991	-0.66003	-0.0183168	0.647618	0.0427145	-0.2567	0.412333	0.9804	0.185	0.507262	0.716748	NA	cytokinin oxidase 3
Mt0012_00668	Medtr5g033510	TAA1-like	-0.256672	0.13335	0.818518	0.0640066	0.312095	-0.170933	0.2062	0.375189	0.9804	0.0811	0.95543	0.96822	NA	tryptophan aminotransferase of Arabidopsis 1
Mt0002_10081	Medtr1g008380	YUCCA	-0.15143	-0.291883	-0.378904	-0.847639	0.141778	-0.363388	-0.2722	0.0778394	0.542903	-0.359	0.0351029	0.0804135	NA	IPR010547:Plant specific mitochondrial import receptor subunit TOM20; IPR020946:Flavin monooxygenase-like
Mt0003_00987	Medtr7g057920	KRP3	-0.653296	-0.118144	-0.156309	-0.970607	-1.0073	-0.853443	-0.2957	0.228987	0.905396	-0.9399	4.86055e-14	4.69871e-13	NA	inhibitor/interactor with cyclin-dependent kinase
