# Supplementary material for: Dual RNA-Seq Analysis Pinpoints to a BalancedRegulation between Symbiosis and Immunity in the Medicago truncatula-Sinorhizobium meliloti Symbiotic Interactions
Source: Preprints.org preprint supplement (doi:10.20944/preprints202309.0662.v1), 2023-09-11
Supplement: Supplementary file 9 [file Table S6.xlsx]

## Sheet: Sheet1
Table S6：Candidate genes involved in the control of the nodule meristem and differentiation in S. meliloti
Gene ID	Gene Name	Description	WT-6dpi_CPM	WT-6dpi_CPM	WT-6dpi_CPM	nad1-1-6dpi_CPM	nad1-1-6dpi_CPM	nad1-1-6dpi_CPM	WT-10dpi_CPM	WT-10dpi_CPM	WT-10dpi_CPM	nad1-1-10dpi_CPM	nad1-1-10dpi_CPM	nad1-1-10dpi_CPM	6dpi-log2FC	6dpi-log2FC	6dpi-log2FC	10dpi-log2FC	10dpi-log2FC	10dpi-log2FC	nad1-1 vs. WT(6 dpi)			nad1-1 vs. WT(10 dpi)
																					Log2FC	PValue	FDR	Log2FC	PValue	FDR
SMc01873	ftsA	Cell division protein	108.23	92.16	99.25	134.97	148.58	120.87	34.39	29.3	26.63	82.48	79.69	91.62	0.318538	0.689027	0.284317	1.26206	1.4435	1.78261	0.4326	0.425351	0.61669	1.4905	1.454e-06	4.9872e-06
SMc03808	ftsK	Putative DNA translocase	81.37	82.7	79.21	128.65	143.25	113.05	35.94	37.5	34.12	110.37	106.4	119.23	0.660883	0.792576	0.513207	1.61869	1.50454	1.80506	0.6621	0.0108529	0.0342858	1.6433	7.11639e-11	3.6116e-10
SMb20595	ftsK2	Putative DNA translocase	77.84	77.51	67.11	108.31	104.31	68.46	46.06	62.63	47.37	56.54	58.04	82.21	0.476583	0.428423	0.0287335	0.295757	-0.109806	0.79534	0.3374	0.985073	0.993709	0.3346	0.00846417	0.0168579
SMc01872	ftsQ	Cell division transmembrane protein	51.56	41.01	39.89	58.83	64.9	44.2	14.92	11.85	12.44	33.69	36.85	35.77	0.1903	0.662243	0.148019	1.17507	1.63678	1.52376	0.3423	0.96964	0.987192	1.439	0.000767813	0.00184098
SMc01874	ftsZ1	Cell division protein	508.2	464.64	452.96	693.54	768.18	558.79	129.5	107.3	101.56	451.92	519.58	562.9	0.448583	0.725331	0.302923	1.80312	2.2757	2.47055	0.5029	0.161081	0.314206	2.181	5.39335e-33	7.85889e-32
SMc04296	ftsZ2	Cell division protein ftsz	171.16	186.35	199.26	237.78	269.81	210.45	87.07	85.94	74.39	218.41	220.64	224.66	0.474282	0.533929	0.0788254	1.32679	1.36029	1.59456	0.367	0.725185	0.849662	1.4237	3.73195e-09	1.66453e-08
SMb21524	minC	Putative cell division inhibitor	59.02	58.81	53.69	60.2	96.66	69.63	22.45	22.66	23.55	44.15	60.8	50.83	0.0285596	0.716858	0.375056	0.975698	1.42392	1.10995	0.4011	0.66828	0.810282	1.182	0.0179145	0.0332233
SMb21523	minD	Putative cell division inhibitor	101.56	98.7	93.96	120.95	150.44	100.53	25.69	25.39	21.14	83.26	87.98	79.7	0.252078	0.608066	0.0975075	1.69642	1.79292	1.9146	0.319217	0.373596	0.568723	0.866	0.691592	0.755856
SMb21522	minE	Putative cell division inhibitor	31.96	32.45	33.27	31.89	38.48	29.53	10.51	8.59	9.1	22.85	26.72	17.57	-0.00316331	0.24589	-0.172041	1.12043	1.63719	0.949176	0.0235622	0.0946024	0.206847	1.2515	0.0367415	0.0632381
SMc01167	dnaA	Chromosomal replication initiator	543.1	552.07	496.25	532.73	523.17	469.41	205.79	173.45	175.55	436.04	435.29	401.62	-0.0278133	-0.0775714	-0.0802185	1.08329	1.32746	1.19395	-0.0612	0.000766097	0.0032144	1.1982	4.11022e-05	0.000117906
SMb20044	repC1	Probable replication protein C	95.48	98.92	94.71	100.88	106.86	96.82	74.48	82.82	77.34	63.12	73.24	67.77	0.0793697	0.111388	0.0317883	-0.238756	-0.177347	-0.190568	0.0751	0.0543883	0.133902	-0.201	1.22309e-12	7.09894e-12
SMa2391	repC2	RepC2 replication protein	91.76	110.19	116.26	149.54	146.5	125.57	72.53	81.91	75.87	83.65	101.8	84.72	0.704594	0.410907	0.111137	0.205788	0.313626	0.159173	0.4059	0.531468	0.71053	0.2303	6.82036e-05	0.000189702
SMc00776	cbrA	Two-component histidine kinase,stationary-phase regulator of cell surface physiology and symbiosis	336.64	296.31	342.56	472.25	538.24	513.42	163.75	172.15	148.66	484.06	468.45	419.82	0.488344	0.861142	0.583783	1.56369	1.44423	1.49775	0.6435	0.00451645	0.015865	1.5019	2.54153e-12	1.43627e-11
SMc00021	ccrM	Adenine DNA methyltransferase	50.98	42.81	55.58	74.22	101.53	52.03	19.07	19.79	19	63.9	59.42	72.17	0.541877	1.24589	-0.0952221	1.74451	1.58618	1.9254	0.6088	0.156211	0.306794	1.7565	1.78929e-09	8.19203e-09
SMc00654	ctrA	Cell cycle transcriptional regulator CtrA,autoregulated,response regulator	541.33	574.6	573.38	609.7	578.11	535.91	252.9	236.74	220.11	494.9	419.17	458.1	0.171591	0.00878604	-0.0975008	0.96857	0.824232	1.05744	0.0291	0.00683047	0.0228778	0.9511	0.0749859	0.118057
SMc00059	divJ	Putative sensor histidine kinase	40.19	34.48	41.02	47.83	60.96	40.68	16.35	14.98	11.37	42.98	32.24	40.79	0.251079	0.822103	-0.0120078	1.39437	1.10581	1.84298	0.3696	0.831642	0.914174	1.4419	0.000798961	0.00191271
SMc01371	divK	DivK cell division response regulator,essential cell cycle regulator	17.06	14.42	15.69	18.42	21.56	18.19	6.49	7.16	8.03	15.88	16.58	16.94	0.110655	0.580286	0.2133	1.29092	1.21141	1.07696	0.3024	0.91577	0.96255	1.1881	0.118877	0.176401
SMc00471	cckA	Putative sensor histidine kinase transmembrane protein	224.1	217.22	222.7	316.94	302.27	292.6	86.94	83.08	79.21	256.36	231.69	240.97	0.500067	0.476681	0.393828	1.56008	1.47962	1.6051	0.4575	0.232365	0.412783	1.5485	1.213e-12	7.04694e-12
SMc04011	tacA	Putative sigma-54-dependent transcription regulator	58.82	50.93	49.53	54.15	69.54	48.9	48.14	47.92	46.83	46.86	54.35	55.22	-0.119345	0.449327	-0.0184682	-0.0388792	0.181652	0.237758	0.1158	0.186955	0.351084	0.1306	1.61972e-05	4.91366e-05
