# Supplementary material for: Dual RNA-Seq Analysis Pinpoints to a BalancedRegulation between Symbiosis and Immunity in the Medicago truncatula-Sinorhizobium meliloti Symbiotic Interactions
Source: Preprints.org preprint supplement (doi:10.20944/preprints202309.0662.v1), 2023-09-11
Supplement: Supplementary file 10 [file Table S7.xlsx]

## Sheet: Sheet1
Table S7：Plant nodule genes involved in symbiotic nitrogen fixation.
Gene ID（ Mt20120830-LIPM）	Gene ID（Mt4.0v1-JCVI）	Gene Name	WT-6dpi_CPM	WT-6dpi_CPM	WT-6dpi_CPM	nad1-1-6dpi_CPM	nad1-1-6dpi_CPM	nad1-1-6dpi_CPM	WT-10dpi_CPM	WT-10dpi_CPM	WT-10dpi_CPM	nad1-1-10dpi_CPM	nad1-1-10dpi_CPM	nad1-1-10dpi_CPM	6dpi-log2FC	6dpi-log2FC	6dpi-log2FC	10dpi-log2FC	10dpi-log2FC	10dpi-log2FC	nad1-1 vs. WT(6 dpi)			nad1-1 vs. WT(10 dpi)
																					Log2FC	PValue	FDR	Log2FC	PValue	FDR
Mt0007_10347	Medtr3g095100	MtBRI1	143.27	142.9	140.6	142.55	169.48	134.82	83.91	91.95	82.8	144.89	122.27	123.96	-0.00726851	0.246109	-0.0605621	0.788043	0.411149	0.582172	0.0663	0.393479	0.9804	0.5966	8.43178e-06	3.82593e-05
Mt0010_01063	Medtr5g097910	MtCHR	68.03	51.74	114.96	101.6	173.3	117.33	75.61	86.86	86.57	204.55	316.82	302.32	0.578657	1.74392	0.02944	1.4358	1.8669	1.80414	0.7407	0.0175326	0.20841	1.7257	4.71604e-15	4.82782e-14
Mt0011_00522	Medtr7g084300	MtCHS	0.69	0.53	0.53	0.98	0.55	0.83	0.35	0.22	0.31	0.57	0.31	0.17	0.506185	0.0534393	0.647119	0.703607	0.494765	-0.866733	0.4314	0.268532	0.950766	0.2548	0.797422	0.922774
Mt0004_00669	Medtr1g064240	MtCNGC15a	0	0.07	0	0	0.03	0	0	0	0	0	0.06	0	0	-1.22239	0	0	0	0	-1.2224	0.807099	0.9804	4.3219	0.700623	0.873626
Mt0003_00360	Medtr4g058730	MtCNGC15b	0.31	0.56	0.49	0.43	0.35	0.33	0.28	0.48	0.21	0.2	0.28	0.14	0.472068	-0.678072	-0.570316	-0.485427	-0.777608	-0.584963	-0.293	0.658011	0.9804	-0.6457	0.30281	0.488986
Mt0016_00483	Medtr2g094860	MtCNGC15c	0.51	0.53	0.56	0.43	0.38	0.73	0.35	0.66	0.21	0.2	0.46	0.12	-0.246161	-0.479993	0.38247	-0.807355	-0.520832	-0.807355	-0.0551	0.994173	0.999951	-0.6453	0.326047	0.518402
Mt0005_01094	Medtr5g026850	MtIPD3	302.28	293.06	306.76	235.16	226.08	276.07	524.45	458.74	451.66	141.92	122.73	116.32	-0.362243	-0.374363	-0.152076	-1.88573	-1.90219	-1.95714	-0.291	0.0822562	0.560393	-1.9132	3.23358e-97	3.82527e-95
Mt0006_01065	Medtr3g065980	MtDELLA1	130.99	154.69	186.45	150.7	123.66	113.35	184.1	141.81	146.76	73.83	75.84	63.72	0.202223	-0.323001	-0.718004	-1.31821	-0.902928	-1.20364	-0.2842	0.171416	0.812251	-1.1473	2.23318e-23	3.55373e-22
Mt0023_10495	Medtr2g005870	MtDMI1	24.87	29.8	31.41	23.35	13.08	20.8	44.1	34.44	33.74	9.54	9.34	4.92	-0.090984	-1.18795	-0.59464	-2.20872	-1.88259	-2.77773	-0.5889	0.0214883	0.238014	-2.2381	2.59053e-22	3.93233e-21
Mt0085_10024	Medtr7g027960	MtFNSII	0.07	0.17	0.07	10.95	1.96	3.58	0.28	0	0.1	10.83	8.2	9.11	7.28936	3.52725	5.67646	5.27346	#DIV/0!	6.50938	5.7332	1.97e-13	4.66e-11	6.2105	1.24567e-35	3.34653e-34
Mt0005_11021	Medtr5g026460	MtHMGR1	3.64	2.61	0.95	2.03	4.01	5.57	0.94	1.35	0.94	6.58	5.62	6.6	-0.842459	0.619552	2.55168	2.80735	2.05761	2.81173	0.6893	0.189241	0.843447	2.5411	2.58374e-23	4.09294e-22
Mt0010_00455	Medtr5g086130	MtLYK3	0.31	0.13	0.07	0.43	0.1	0.1	0.39	0.07	0.1	0.03	0.43	0.14	0.472068	-0.378512	0.514573	-3.70044	2.61891	0.485427	0.3049	0.746723	0.9804	0.0995	0.926185	0.949241
Mt0001_00813	Medtr4g116990	MtNFH1	25.35	28.51	17.3	19.01	20.56	24.22	10.74	10.82	7.14	10.76	11.71	10.74	-0.415227	-0.471628	0.485427	0.00268408	0.114041	0.588998	-0.1577	0.674749	0.9804	0.2106	0.452153	0.663188
Mt0028_00160	Medtr8g020840	MtNSP1	68.62	65.45	71.07	84.77	94.22	83.37	54.84	63.91	66.33	83.61	79.25	100.26	0.304925	0.52564	0.230288	0.608447	0.310369	0.596013	0.3549	0.000565363	0.0142021	0.5076	0.00908073	0.0241539
Mt0006_00755	Medtr3g072710	MtNSP2	2.71	5.22	7.32	4.77	6.45	2.12	2.75	1.75	1.98	2.06	1.84	2.31	0.815696	0.305249	-1.78778	-0.416787	0.0723508	0.222392	-0.1931	0.791164	0.9804	-0.0614	0.660679	0.852597
Mt0014_10703	Medtr4g020620	MtPHO2-like	5.94	6.31	7.94	8.22	9.4	6.07	5.55	4.09	4.92	8.47	7.16	6.89	0.468675	0.575021	-0.387442	0.609874	0.807859	0.485846	0.2306	0.210379	0.87918	0.6292	0.00076762	0.00256152
Mt0010_00289	Medtr5g083030	MtPUB1	18.56	21.44	22.78	20.86	17.77	18.91	28.87	21.79	25.76	7.08	8.94	4.8	0.168542	-0.270861	-0.268618	-2.02775	-1.28532	-2.42403	-0.1257	0.573334	0.9804	-1.876	4.7882e-18	5.83853e-17
Mt0232_00003	Medtr8g073380	MtNFS1	2.02	2.38	2.33	1.91	1.22	1.33	1.65	0.66	1.66	0.51	0.4	0.93	-0.0807827	-0.96408	-0.808904	-1.6939	-0.722466	-0.835881	-0.5936	0.0530486	0.430235	-1.1094	0.0190939	0.0468824
Mt0034_10215	Medtr8g465280	MtNFS2	47.1	44.8	35.12	30.58	26.1	34	20.65	22.85	22.64	10.56	10.97	11.81	-0.623139	-0.779449	-0.0467581	-0.967532	-1.05863	-0.938865	-0.4862	0.0274891	0.281705	-0.9883	5.58046e-13	4.99479e-12
Mt0003_10260	Medtr4g056430	MtAGO5	126.05	110.98	80.16	83.75	83.92	104.99	65.46	57.18	51.38	59.59	49.94	46.67	-0.589835	-0.403213	0.389298	-0.135543	-0.195315	-0.138711	-0.2182	0.477719	0.9804	-0.1559	0.0731546	0.15197
Mt0003_10263	Medtr4g056470	MtAGO5	7.82	6.77	3.91	4.74	5.68	6.6	4.25	4.35	4.3	5.26	3.66	4.28	-0.722282	-0.253265	0.755297	0.3076	-0.249172	-0.00672586	-0.1203	0.83084	0.9829	0.0332	0.833177	0.922774
Mt0027_10212	Medtr1g094960	MtARF16a	11.32	15.79	13.95	17.23	7.25	9.39	10.11	7.06	8.22	8.57	7.71	5.5	0.606049	-1.12296	-0.571068	-0.238416	0.127063	-0.579707	-0.2777	0.467307	0.9804	-0.2213	0.152678	0.282601
Mt0087_00053	Medtr6g052300	MtCBS1	19.08	24.75	15.46	16.06	14.59	16.06	11.21	7.35	8.7	5.23	5.41	3.04	-0.248589	-0.762449	0.0549316	-1.0999	-0.442116	-1.51694	-0.3441	0.176698	0.823997	-0.9947	1.80362e-05	7.78417e-05
Mt0005_00835	Medtr5g022030	MtCDPK1	269.38	262.67	155.99	243.9	234.26	314.29	196.69	222.75	188.33	358.24	362.02	332.85	-0.143353	-0.165141	1.01064	0.865003	0.700644	0.821609	0.2038	0.351482	0.9804	0.7931	6.95656e-09	4.46351e-08
Mt0003_10505	Medtr4g062330	MtEXO70H4	33.48	38.26	43.2	53.01	33.06	46.08	27.3	23	23.72	63.34	74.52	64.41	0.662965	-0.21075	0.0931094	1.21422	1.69599	1.44118	0.2013	0.203674	0.868393	1.4503	1.22874e-27	2.39422e-26
Mt0004_10235	Medtr3g106420	MtFLOT2	47.45	48.97	36.8	39.72	39.51	40.8	25.18	24.79	21.08	39.16	36.32	33.19	-0.256542	-0.30968	0.148863	0.637102	0.551006	0.654874	-0.1504	0.566035	0.9804	0.613	6.56733e-06	3.02437e-05
Mt0004_10235	Medtr3g106430	MtFLOT4	6.35	6.67	3.28	4.52	3.56	4.68	3.15	1.94	1.42	3.51	3.69	1.74	-0.490434	-0.90581	0.512813	0.156119	0.927564	0.293196	-0.3532	0.354177	0.9804	0.4576	0.282231	0.462931
Mt0003_01013	Medtr4g074130	MtGA20ox10	0.99	1.19	0.72	0.95	1.09	0.96	1.06	0.48	0.69	0.54	0.77	0.61	-0.059501	-0.126633	0.415037	-0.973033	0.681824	-0.177787	0.0489	0.782058	0.9804	-0.2159	0.54681	0.75449
Mt0012_10533	Medtr5g036087	MtMMPL	71.7	81.05	73.66	51.69	59.52	58.62	41.62	37.88	40.7	24.32	26	25.98	-0.472088	-0.445438	-0.329488	-0.775134	-0.542925	-0.647627	-0.4148	0.00886535	0.126522	-0.6557	6.61936e-11	5.0614e-10
Mt0007_00917	Medtr3g107970	MtRbohA	6.14	7	7.19	7.66	5.23	5.64	6.57	4.79	3.95	2.63	2.4	1.19	0.319106	-0.420544	-0.350297	-1.32083	-0.996991	-1.73089	-0.1337	0.673035	0.9804	-1.2995	1.21421e-05	5.38145e-05
Mt0010_00858	Medtr5g094210	MtN5	374.19	394.46	370.71	565.52	315.23	394.57	399.39	320.51	300.84	313.32	284.65	229.29	0.595807	-0.323474	0.0899902	-0.350161	-0.17118	-0.391823	0.1626	0.333978	0.9804	-0.3032	0.00935881	0.0248141
Mt0004_00313	Medtr1g056530	MtNF-YA1	641.24	695.72	614.45	568.62	531.5	587.27	420.52	314.74	306.81	274.33	283.08	255.21	-0.1734	-0.388437	-0.0652717	-0.616262	-0.152951	-0.265661	-0.2097	0.168569	0.806267	-0.3588	0.00115615	0.00372932
Mt0020_00212	Medtr8g075240	MtROP6	53.49	54.75	49.57	53.91	46.66	49.33	44.22	43.61	37.51	50.52	47.75	48.41	0.0112837	-0.230673	-0.00700197	0.192156	0.130842	0.36803	-0.0742	0.845677	0.986156	0.2268	0.146253	0.27269
Mt0039_00030	Medtr1g090807	MtRPG	42.99	46.22	42.97	52.64	54.74	53.11	59.36	73.63	53.57	32.07	33.13	28.18	0.292158	0.244078	0.305654	-0.888267	-1.15216	-0.926754	0.28	0.00166923	0.0344807	-0.9985	2.72817e-10	1.98184e-09
Mt0031_10191	Medtr0041s0030	MtSKL	118.29	132.29	145.55	138.27	98.48	110.14	114.47	86.61	97.36	131.16	120.49	117.74	0.22516	-0.425801	-0.402176	0.196358	0.476308	0.274203	-0.1915	0.360143	0.9804	0.3077	0.019855	0.0485496
Mt0001_00293	Medtr4g129010	MtSPK1	36.54	39.55	33.78	37.97	29.53	33.11	26.63	22.41	21.08	13.69	14.07	11.08	0.0553834	-0.421496	-0.0289023	-0.95993	-0.67152	-0.927917	-0.127	0.595292	0.9804	-0.8523	1.0444e-10	7.86185e-10
Mt0033_10061	Medtr6g027840	MtVPY	92.39	110.88	107.57	81.94	69.62	82.04	103.69	80.83	87.23	38.79	45.45	38.95	-0.173169	-0.671425	-0.390876	-1.41852	-0.830611	-1.1632	-0.4121	0.00404102	0.0691943	-1.1414	2.51082e-20	3.44564e-19
Mt0006_10327	Medtr3g083580	MtBG2	11.15	10.84	8.67	11.88	12.22	12.21	5.23	4.17	5.48	7.76	8.79	6.22	0.0914911	0.17288	0.493959	0.569246	1.07582	0.182739	0.244	0.0954717	0.611178	0.6138	0.0058579	0.016306
Mt0007_10556	Medtr3g099620	MtbHLH1	39.97	43.94	38.37	32.68	25.3	31.98	68.68	75.2	79.81	21.92	18.59	16.15	-0.29051	-0.796397	-0.262809	-1.64764	-2.01621	-2.30504	-0.4428	0.00974526	0.136155	-1.9811	9.82958e-44	3.45451e-42
Mt0005_00474	Medtr5g014520	MtbHLH476	14.86	11.89	2.49	4.15	12.44	15.23	6.84	21.97	27.43	22.97	13.77	17.77	-1.84025	0.0652378	2.6127	1.74768	-0.674006	-0.626311	0.122	0.789483	0.9804	-0.0451	0.811174	0.922774
Mt0001_11374	Medtr4g102510	MtCCS52a	225.26	235.41	192.13	194.7	140.46	183.55	140.28	116.66	112.23	86.81	86.56	78.79	-0.210338	-0.745016	-0.0659097	-0.692376	-0.430538	-0.510374	-0.3317	0.108821	0.656655	-0.5499	3.02454e-09	2.00247e-08
Mt0075_00083	Medtr8g058380	MtCDC16	16.54	15.79	15.26	17.05	19.47	17.08	14.99	11.44	11.89	8.77	8.88	8.85	0.0438125	0.302242	0.162553	-0.773352	-0.365455	-0.425999	0.1716	0.123414	0.69961	-0.5321	2.73552e-05	0.000115017
Mt0009_10996	Medtr8g106150	MtCRE1	142.34	156.97	172.7	138.52	103.71	123.31	159	122.22	124.16	59.02	56.14	38.95	-0.0392468	-0.597934	-0.485978	-1.42975	-1.12238	-1.67251	-0.3688	0.0226343	0.246921	-1.3953	1.23913e-17	1.47941e-16
Mt0042_00045	Medtr7g106250	MtDGD1	111.29	107.28	96.97	119.2	82	122.08	89.73	89.2	78.63	124.28	102.57	104.52	0.0990603	-0.387685	0.332216	0.469932	0.201493	0.410627	0.035	0.664573	0.9804	0.3635	0.00916107	0.0243435
Mt0064_00055	Medtr4g008860	MtEFD	109.85	130.74	139.12	98.67	108.45	77.66	93.86	66.94	71.49	31.6	27.78	34.09	-0.154851	-0.269671	-0.841086	-1.57059	-1.26882	-1.06839	-0.4151	0.0361951	0.335844	-1.3134	5.07154e-20	6.84668e-19
Mt0011_00459	Medtr7g085810	MtERN1	30.43	40.21	28.03	35.72	28.25	30.98	23.48	18.97	20.18	13.46	11.43	7.61	0.231238	-0.509303	0.144365	-0.802754	-0.730894	-1.40696	-0.0554	0.982507	0.999951	-0.9464	3.33402e-07	1.80753e-06
Mt0033_10028	Medtr6g029180	MtERN2	1.3	1.72	2.04	3.05	1.09	2.09	2.12	0.95	1.28	2.73	2.49	2.58	1.2303	-0.65808	0.0349338	0.364837	1.39015	1.01123	0.3001	0.401793	0.9804	0.8425	0.00830796	0.0223125
Mt0002_10241	Medtr1g012960	MtKNAT3	184.13	187.73	185.93	161.59	142.8	188.62	216.79	187.91	208.51	90.79	97.54	81.48	-0.188387	-0.394663	0.0207231	-1.25569	-0.945976	-1.3556	-0.1781	0.408208	0.9804	-1.1844	4.58534e-31	1.03639e-29
Mt0007_00845	Medtr3g106400	MtKNAT5	40.31	46.02	34.47	35.48	29.02	35.46	25.81	25.96	22.92	36.76	32.79	23.21	-0.184132	-0.665213	0.0408512	0.510207	0.336966	0.0181395	-0.2732	0.205302	0.871865	0.3126	0.178425	0.320645
Mt0001_00834	Medtr4g116545	MtKNAT8	47.17	57.22	64.96	60.12	38.35	46.97	84.34	70.41	86.68	54.6	47.35	39.73	0.349975	-0.577293	-0.467812	-0.627316	-0.572416	-1.12547	-0.2196	0.398711	0.9804	-0.769	1.51112e-09	1.02737e-08
Mt0150_10025	Medtr2g461240	MtKNAT10	67.96	74.57	79.14	103.69	78.47	78.39	82.41	70.74	70.45	105.97	94.12	90.51	0.609519	0.0735459	-0.0137374	0.362765	0.411975	0.361477	0.2331	0.0414557	0.366681	0.3781	0.000690753	0.00232324
Mt0026_00035	Medtr7g067450	MtLAX2	50.23	69.35	77.54	87.1	33.74	57.69	71.32	46.25	62.69	40.61	40.04	24.91	0.794123	-1.03944	-0.426619	-0.812472	-0.208011	-1.33151	-0.1429	0.774212	0.9804	-0.772	9.63967e-05	0.000372089
Mt0039_10091	Medtr1g090320	MtLIN	373.78	349.89	375.01	293.93	350.28	348.22	360.14	395.24	354.83	305.36	294.33	337.91	-0.346717	0.00160718	-0.10693	-0.238047	-0.425294	-0.0704889	-0.1467	0.537158	0.9804	-0.2438	0.0160772	0.0402425
Mt0031_10187	Medtr0041s0100	MtLOG1	87.86	98.92	80.62	74.86	77.96	74.44	41.42	32.87	38.62	26.91	28.49	25.29	-0.231011	-0.343528	-0.11506	-0.622185	-0.206316	-0.610781	-0.2347	0.18181	0.830573	-0.4847	3.41558e-06	1.6306e-05
Mt0003_01592	Medtr4g087620	MtMPK6	81	77.08	71.23	79.87	77.44	72.78	62.98	59.92	54.47	70.72	70.8	70.2	-0.0202682	0.00672238	0.0310571	0.167225	0.240712	0.366009	0.0049	0.638801	0.9804	0.2554	0.0558844	0.120715
Mt0002_00112	Medtr1g009200	MtNIP	47.79	49	52.98	50.98	49.48	42.66	30.96	29.17	33.49	56.53	52.49	54.98	0.0932226	0.0140638	-0.312564	0.868611	0.847557	0.715177	-0.0655	0.921709	0.999951	0.8088	9.84057e-12	8.04065e-11
Mt0040_00276	Medtr3g115400	MtNLP1	83.71	99.98	102.75	123.56	81.77	82.6	170.25	133.4	124.75	97.64	92.74	66.58	0.56174	-0.290068	-0.314925	-0.802111	-0.524495	-0.905879	0.0075	0.76046	0.9804	-0.7374	1.85674e-06	9.19229e-06
Mt0011_10241	Medtr7g090020	MtNOOT	39.25	48.44	52.23	56.21	43.93	41.57	55.82	51.4	50.97	55.24	56.88	61.66	0.518134	-0.140992	-0.329336	-0.0150688	0.146153	0.274687	0.0183	0.656396	0.9804	0.1356	0.516037	0.724287
Mt0016_00215	Medtr2g101090	MtPEN3-like	51.94	63.9	57.64	81.38	39.76	55.8	54.92	49.43	53.46	175.04	141.97	141.21	0.647828	-0.684498	-0.0468052	1.67228	1.52213	1.40131	0.0285	0.771735	0.9804	1.5379	3.73487e-43	1.29049e-41
Mt0001_10398	Medtr4g127100	MtPIN2	0.79	0.76	1.9	0.83	1.44	0.63	0.59	0.62	0.76	0.51	0.83	0.98	0.0712587	0.921997	-1.59258	-0.210218	0.420843	0.366782	-0.2505	0.738284	0.9804	0.2359	0.686452	0.86765
Mt0002_10996	Medtr1g030890	MtPIN3	2.4	3.4	3.68	1.54	1.03	1.33	2.16	1.21	1.42	1.69	1.66	1.1	-0.640104	-1.72289	-1.46828	-0.354008	0.456176	-0.368387	-1.2814	2.5e-05	0.000992923	-0.1062	0.600544	0.806142
Mt0082_00042	Medtr6g069510	MtPIN4	17.81	18.57	21.9	15.6	19.82	13.73	7.59	6.54	7.25	6.88	6.88	6.42	-0.191141	0.0939831	-0.673599	-0.141691	0.0731179	-0.175408	-0.2458	0.338241	0.9804	-0.0833	0.304584	0.491327
Mt0016_00349	Medtr2g098180	MtPLT1	0.96	1.55	1.18	1.2	1.31	1.49	1.1	0.8	0.66	0.81	0.61	0.55	0.321928	-0.242701	0.336525	-0.44151	-0.391191	-0.263034	0.1164	0.602105	0.9804	-0.3779	0.261224	0.436473
Mt0003_10657	Medtr4g065370	MtPLT2	0.07	0.1	0.36	0.06	0.06	0.1	0.08	0	0	0.07	0.03	0.03	-0.222392	-0.736966	-1.848	-0.192645	0	0	-1.2685	0.286545	0.96952	0.7004	0.7189	0.885538
Mt0012_00744	Medtr5g031880	MtPLT3	122.2	133.08	101.79	95.47	107.49	105.96	58.93	54.44	51.31	63.91	58.39	49.13	-0.356125	-0.308091	0.0579239	0.117039	0.101054	-0.0626358	-0.209	0.360602	0.9804	0.058	0.922053	0.949241
Mt0011_00702	Medtr7g080460	MtPLT4	29.98	34.96	23.24	26.12	28	34.9	16.99	13.67	16.33	23.34	18.19	14.12	-0.198845	-0.320278	0.586617	0.458119	0.412132	-0.209785	0.0137	0.763252	0.9804	0.244	0.357653	0.55641
Mt0010_10502	Medtr5g088410	MtPNO1-like	0	0.03	0.1	0	0.03	0	0.04	0	0	0.03	0.06	0.03	0	0	0	-0.415037	0	0	-2.1155	0.461205	0.9804	1.585	0.434784	0.644238
Mt0017_00449	Medtr3g015490	MtRR5/9/11	5.04	6.05	7.48	6.34	4.91	5.51	3.78	2.82	3.43	3.04	4.09	2.92	0.331059	-0.301212	-0.440986	-0.314315	0.536406	-0.23224	-0.148	0.652338	0.9804	0.0029	0.805549	0.922774
Mt0017_00449	Medtr4g051330	MtRR5/9/11	5.04	6.05	7.48	6.34	4.91	5.51	3.78	2.82	3.43	3.04	4.09	2.92	0.331059	-0.301212	-0.440986	-0.314315	0.536406	-0.23224	-0.148	0.652338	0.9804	0.0029	0.805549	0.922774
Mt0006_10167	Medtr3g086740	MtZR1	0.07	0.13	0.1	0.25	0.03	0.03	0.04	0.07	0	0.13	0.12	0.06	1.8365	-2.11548	-1.73697	1.70044	0.777608	0	0.0473	0.936073	0.999951	1.4948	0.290777	0.472925
Mt0049_00180	Medtr3g051770	MtCPK3	73.45	71.5	48.88	80.89	60.51	85.59	50.71	62.88	52.22	125.53	116.16	115.05	0.139199	-0.24077	0.808198	1.30769	0.88544	1.13959	0.2278	0.247262	0.929887	1.1053	4.89784e-13	4.39734e-12
Mt0040_10072	Medtr3g110840	MtCRA2	25.9	39.58	52.82	52.95	16.71	26.67	78.87	47.01	66.05	27.45	25.75	14.29	1.03168	-1.24406	-0.985866	-1.52267	-0.868395	-2.20855	-0.2964	0.546568	0.9804	-1.5078	5.91602e-10	4.16917e-09
Mt0035_10029	Medtr7g020850	MtCRN	9.47	12.46	11.29	9.72	5.26	7.13	9.2	7.82	7.45	4.28	3.44	2.49	0.0375919	-1.24417	-0.663072	-1.10402	-1.18476	-1.58109	-0.5874	0.0303875	0.30175	-1.261	1.64387e-10	1.21573e-09
Mt0010_10562	Medtr5g089520	MtRDN1	21.72	24.19	27.28	23.17	23.67	21.76	21.01	18.86	15.32	14.37	16.62	15.05	0.0932339	-0.0313511	-0.326165	-0.548016	-0.182409	-0.0256528	-0.0934	0.776876	0.9804	-0.2615	0.0415912	0.0933829
Mt0085_10101	Medtr7g029290	MtTML1	52.39	53.95	63.78	70.58	51.41	56.1	32.85	27.6	32.73	41.21	42.1	44.73	0.429968	-0.0695739	-0.185103	0.327101	0.609152	0.450629	0.0661	0.436904	0.9804	0.4585	0.000997924	0.00326633
Mt0033_00273	Medtr6g023805	MtTML2	13.55	17.05	23.01	17.78	18.54	14.5	7.71	12.06	12.27	12.18	11.83	11.86	0.391962	0.12087	-0.666208	0.659711	-0.0277798	-0.0490312	-0.0771	0.942109	0.999951	0.1629	0.71294	0.880154
Mt0027_10314	Medtr1g492760	MtDME	367.09	312.75	335.52	237.84	260.17	306.66	197.99	180.64	160.25	122.7	110.5	107.29	-0.626142	-0.265555	-0.129759	-0.690292	-0.709071	-0.578809	-0.3355	0.104322	0.64106	-0.6624	1.52534e-12	1.3235e-11
Mt0043_00134	Medtr3g027890	MtDNF1	690.03	639.35	611.69	556.62	626.45	615.64	304.75	299.93	293.46	263.33	243.41	293.44	-0.309966	-0.0294066	0.00928628	-0.210754	-0.301237	-9.83265e-05	-0.1099	0.692524	0.9804	-0.1666	0.0525744	0.11442
Mt0143_10009	Medtr7g029760	MtDNF7	6.48	6.05	8.01	3.11	2.5	3.78	14.59	13.71	18.1	1.32	0.83	1.62	-1.05908	-1.27501	-1.08342	-3.46637	-4.04597	-3.48192	-1.1292	5.91e-06	0.00028609	-3.6215	1.38852e-47	5.44457e-46
Mt0009_10239	Medtr8g089630	MtARP3	36.74	31.85	32.4	33.26	26.87	31.02	33.28	31.88	30.06	23.41	22.46	22.22	-0.143563	-0.245297	-0.0627951	-0.50753	-0.505294	-0.435986	-0.1479	0.507054	0.9804	-0.4838	4.35081e-08	2.58926e-07
Mt0045_10259	Medtr4g012940	MtRab7A1/A2	48.37	44.14	42.54	43.57	44.13	45.81	37.41	38.13	36.16	31.6	30.15	32.47	-0.150777	-0.000326882	0.106843	-0.243499	-0.338769	-0.155287	-0.0165	0.78025	0.9804	-0.2455	0.00446652	0.0127681
Mt0003_10820	Medtr4g069850	MtRab7A1/A2	107.9	104.21	108.29	119.26	108.55	107.81	124.11	120.83	118.58	105.02	99.56	106.66	0.144415	0.058866	-0.00640902	-0.240955	-0.279341	-0.152841	0.067	0.173554	0.815489	-0.224	0.00170713	0.00531924
Mt0009_10577	Medtr8g097320	MtsymREM1	196	212.38	165.51	146.98	148.51	149.55	202.39	176.32	208.27	72.21	62.57	73	-0.415234	-0.516088	-0.14629	-1.48687	-1.49465	-1.51249	-0.3668	0.0352429	0.330667	-1.4983	3.17005e-41	1.03294e-39
Mt0019_00372	Medtr2g088700	MtSYP132	61.17	59.31	59.28	62.4	60.77	62.03	53.11	58.49	48.99	58.04	53.25	55.79	0.0287218	0.0350839	0.0654207	0.128064	-0.135408	0.187519	0.043	0.323657	0.9804	0.0572	0.91702	0.949241
Mt0003_00982	Medtr4g073400	MtSYT1/2/3	135.55	129.15	129.5	128.55	132.47	131.86	106.49	112.78	99.51	97.64	95.32	92.48	-0.0764955	0.036618	0.0260549	-0.125174	-0.24266	-0.1057	-0.0048	0.638358	0.9804	-0.1594	0.0328873	0.0760067
Mt0002_10727	Medtr1g025550	MtSYT1/2/3	9.47	9.91	14.44	11.57	11.58	10.38	14.36	13.2	16.47	20.84	21.91	24.48	0.288953	0.224678	-0.476264	0.5373	0.731052	0.571763	-0.0124	0.817134	0.980884	0.6106	0.000482813	0.00166708
Mt0027_10220	Medtr1g094810	MtSYT1/2/3	25.25	27.49	28.13	71.44	26.65	41.83	29.86	32.76	29.02	49.54	40.35	47.16	1.50045	-0.0447714	0.572428	0.73038	0.300633	0.700516	0.7909	0.0104577	0.143434	0.5807	0.00014426	0.000542966
Mt0003_00519	Medtr4g063090	MtTIP1g	0.69	0.76	0.36	2.09	0.8	0.63	2.95	3.03	4.61	4.55	1.54	0.87	1.59883	0.0740006	0.807355	0.625152	-0.976387	-2.40568	0.9596	0.0939695	0.605621	-0.6055	0.161551	0.296073
Mt0018_00183	Medtr2g028790	MtVAMP721d/e	118.98	109.3	116.99	126.06	135.14	130.21	92.48	95.09	101.1	95.68	96.06	108.57	0.0833915	0.306161	0.154455	0.049076	0.0146422	0.102843	0.181	0.03964	0.354996	0.057	0.939058	0.956054
Mt0007_10725	Medtr3g102980	MtZPT2-1	467	468.24	364.87	533.86	474.8	555.39	441.52	447.34	475.31	939.41	1111.11	745.58	0.193039	0.0200718	0.606119	1.08928	1.31256	0.649494	0.2667	0.0588311	0.45932	1.0354	5.26669e-09	3.40933e-08
Mt0097_10070	Medtr4g019870	MtCOPT1	182.79	155.91	177.23	122.58	106.98	139.26	178.24	184.84	194.23	50.96	60.57	61.2	-0.576464	-0.543372	-0.347842	-1.80638	-1.6096	-1.66616	-0.4843	0.0072612	0.10805	-1.69	3.60824e-34	9.25204e-33
Mt0002_00186	Medtr1g010270	MtMoT1.2	2.06	2.87	3.48	4.43	1.54	2.52	11.21	7.13	5.58	0.54	0.92	0.23	1.10466	-0.89812	-0.465664	-4.37568	-2.9542	-4.60056	0.0137	0.882685	0.992836	-3.8231	4.7617e-21	6.76878e-20
Mt0013_00323	Medtr3g464210	MtMoT1.3	5.39	5.48	3.84	5.97	1.73	5.54	161.72	164.11	135.22	3.71	4.33	3.3	0.147446	-1.6634	0.52878	-5.44594	-5.24415	-5.3567	-0.1519	0.805794	0.9804	-5.3454	1.1236e-249	1.86721e-246
Mt0003_00623	Medtr4g064893	MtMTP2	36.95	38.72	36.6	30.61	28.16	29.72	26.99	24.68	28.36	16.15	14.47	13.92	-0.271571	-0.459432	-0.30041	-0.740891	-0.770277	-1.0267	-0.3434	0.0047122	0.0775938	-0.8454	4.74751e-15	4.85861e-14
Mt0006_00047	Medtr3g088460	MtNRAMP	174.45	156.18	162.75	147.47	109.48	153.16	98.62	84.41	92.5	96.32	91.76	93.9	-0.242392	-0.512542	-0.087618	-0.0340449	0.120451	0.0216718	-0.2667	0.209797	0.878559	0.0334	0.712223	0.879518
Mt0001_10510	Medtr4g124660	MtSUCS1	5187.72	5352.91	8818.51	4281.92	7247.32	5123.86	11804.6	11194.1	11994	3003.62	3407.12	4231.39	-0.276843	0.437124	-0.783304	-1.97457	-1.71612	-1.50311	-0.2172	0.612794	0.9804	-1.7173	4.09994e-26	7.44819e-25
Mt0003_11444	Medtr4g083570	MtZIP6	60.45	55.14	56.2	51.32	44.35	60.08	71.91	74.25	81.27	23.95	23.85	27.32	-0.236221	-0.314165	0.0963147	-1.58617	-1.6384	-1.57277	-0.1414	0.598924	0.9804	-1.5982	2.08267e-33	5.1915e-32
Mt0009_10600	Medtr8g098350	MtyECS	156.65	154.66	244.72	232.27	194.43	174.03	144.8	123.24	111.36	182.9	176.29	153.53	0.568258	0.330151	-0.491796	0.336993	0.51648	0.463289	0.1116	0.434727	0.9804	0.4345	0.00168632	0.00526145
Mt0003_11544	Medtr4g085800	MtDNF2	294.46	267.56	310.14	228.33	246.67	245.82	298.89	305.82	319.81	132.34	134.23	143.29	-0.366951	-0.11728	-0.335317	-1.17537	-1.18798	-1.15828	-0.275	0.0758083	0.53542	-1.1736	2.03121e-27	3.92498e-26
Mt0035_00113	Medtr7g022640	MtNAD1	42.2	39.65	44.25	3.85	6.73	5.54	64.24	50.74	62.69	5.83	5.75	4.95	-3.45431	-2.55864	-2.99772	-3.4619	-3.14149	-3.66273	-2.9676	2.06e-33	4.54e-30	-3.426	2.14264e-139	5.66467e-137
Mt0086_10022	Medtr7g063220	MtRSD	98.5	87.56	86.63	60.46	47.53	68.24	80.56	63.94	75.44	19.16	21.23	18.52	-0.704143	-0.881434	-0.344249	-2.07197	-1.59061	-2.02625	-0.6298	0.00167009	0.0344807	-1.9005	5.39299e-57	2.71188e-55
Mt0022_10196	Medtr7g056527	MtSNARP2	41.31	41.2	37.55	30.83	25.78	34.37	22.54	17.22	19.73	9.75	9.56	11.46	-0.422156	-0.676392	-0.127663	-1.20901	-0.849003	-0.783784	-0.4001	0.0326905	0.316239	-0.9511	3.2135e-11	2.52067e-10
Mt0006_00443	Medtr3g079850	MtSymCRK	402.7	386.93	392.28	264.45	217.97	307.68	697.34	656.02	717.35	107.35	106.54	94.42	-0.60671	-0.827943	-0.350453	-2.69954	-2.62234	-2.92551	-0.581	0.00155859	0.0326378	-2.7477	3.91825e-190	2.13655e-187
Mt0099_00042	Medtr0672s0010	NCR011-TC36630	3.81	2.94	4.73	0.92	1.44	1.23	5.43	5.15	7.73	0.3	0.68	0.87	-2.05009	-1.02975	-1.94318	-4.17792	-2.92097	-3.15138	-1.6771	4.89e-07	3.15e-05	-3.307	1.36277e-20	1.89324e-19
Mt0033_10121	Medtr6g027155	NCR017-TC38410	61.58	61.95	72.19	37.11	23.31	41.53	65.85	56.78	72.32	10.69	10.51	11	-0.730654	-1.41016	-0.797645	-2.62292	-2.43362	-2.71689	-0.9409	0.000156763	0.00477227	-2.598	7.68867e-86	7.6227e-84
Mt0021_00233	Medtr7g009040	NCR020-TC30870	22.16	16.65	23.83	6	8.31	10.78	29.74	23.47	33.91	3	2.98	3.88	-1.88492	-1.0026	-1.14442	-3.30937	-2.97743	-3.12758	-1.32	8.69e-06	0.000404096	-3.1433	3.66662e-56	1.79716e-54
Mt0059_10098	Medtr7g045520	NCR022-TC33888	183.55	161.53	201.62	102.8	111.05	125.93	228.67	253.79	303.2	42.97	49.23	55.59	-0.836333	-0.540593	-0.679017	-2.41187	-2.36603	-2.44737	-0.6861	8.81e-05	0.00293057	-2.4104	3.06973e-41	1.00213e-39
Mt0008_00493	Medtr5g063580	NCR026-TC42818	2.26	1.26	2.17	0.43	0.45	0.56	2.01	1.97	3.26	0.1	0.31	0.14	-2.39391	-1.48543	-1.9542	-4.32912	-2.66786	-4.54137	-1.9824	4.62e-06	0.000230934	-3.7185	3.06541e-14	3.00075e-13
Mt0035_00105	Medtr7g022430	NCR028-TC42570	211.2	198.54	244.29	128.7	115.38	147.42	204.99	226.23	279.17	48.77	57	66.44	-0.714598	-0.783037	-0.728663	-2.07149	-1.98876	-2.07102	-0.7403	9.44e-06	0.000432159	-2.0444	1.25256e-26	2.33503e-25
Mt0097_00003	Medtr4g017920	NCR032-TC29819	8.1	6.64	8.11	5.57	5.03	6.2	10.58	6.36	11.09	1.99	2.18	2.37	-0.540245	-0.400625	-0.387434	-2.4105	-1.5447	-2.2263	-0.4437	0.0410187	0.363736	-2.0996	1.15096e-17	1.37602e-16
Mt0021_10192	Medtr7g008940	NCR033-TC42762	57.19	49.53	58.6	28.06	30.3	42.59	99.92	110.85	127.56	12.51	15.67	15.39	-1.02725	-0.708985	-0.460386	-2.99769	-2.82253	-3.05111	-0.7116	0.00293341	0.0540273	-2.957	1.44247e-64	8.67922e-63
Mt0022_00461	Medtr7g051320	NCR034-Mt0230	11.49	9.71	18.02	5.6	4.84	6.87	36.62	19.3	44.31	1.85	2.43	3.1	-1.03688	-1.00446	-1.39122	-4.30703	-2.98957	-3.83729	-1.18	8.37e-05	0.00280394	-3.7635	4.03828e-33	9.88966e-32
Mt0022_00461	Medtr7g051290	NCR037-TC35546	11.97	9.12	14.44	3.97	3.4	4.48	25.18	20.25	38.1	1.59	1.75	2.78	-1.59221	-1.4235	-1.6885	-3.98518	-3.5325	-3.77663	-1.5842	1.92e-10	2.67e-08	-3.7707	5.70768e-36	1.54889e-34
Mt0050_10137	Medtr1g053625	NCR038-TC34692	17.05	15.17	17.23	4.74	2.63	6.1	28.28	18.79	26.49	2.16	2	2.08	-1.84681	-2.52809	-1.49804	-3.71068	-3.23189	-3.67079	-1.8762	2.75e-09	2.97e-07	-3.5593	7.40713e-75	5.82193e-73
Mt0058_10143	Medtr7g095860	NCR040-TC33271	68.17	55.64	67.26	21.38	22.83	37.85	188.54	247.72	279	12.61	15.86	14.18	-1.67288	-1.28519	-0.829455	-3.90223	-3.96525	-4.29834	-1.2194	2.01e-05	0.000829544	-4.0679	6.95534e-90	7.35538e-88
Mt0424_10001	Medtr1252s0010	NCR045-TC29160	6.72	7.9	10.73	4.92	3.21	4.11	8.61	4.13	7.45	1.35	1.72	0.84	-0.449803	-1.29928	-1.38444	-2.67305	-1.26373	-3.14878	-1.0504	6.99e-05	0.00240999	-2.3684	5.64268e-13	5.0453e-12
Mt0010_00302	Medtr5g083255	NCR052-TC31686	29.4	25.77	28.89	8.28	6.38	11.74	83.91	59.12	89.52	4.32	3.56	4.72	-1.82811	-2.01406	-1.29914	-4.27974	-4.0537	-4.24535	-1.6709	1.96e-10	2.72e-08	-4.206	9.53344e-105	1.3047e-102
Mt0002_11504	Medtr1g042895	NCR057-TC33488	96.85	99.98	98.58	74.3	58.52	72.85	121.91	121.3	118.54	38.82	33.16	29.14	-0.38239	-0.77271	-0.436366	-1.65094	-1.87106	-2.0243	-0.5224	0.000293968	0.00815255	-1.8389	8.98226e-58	4.63018e-56
Mt0065_00006	Medtr6g043650	NCR069-TC42901	56.44	47.41	56.72	14.28	17.67	21.36	119.66	115.97	135.88	7.99	7.77	7.44	-1.98272	-1.42389	-1.40895	-3.9046	-3.89969	-4.19089	-1.5907	7.4e-13	1.59e-10	-4.0012	8.69894e-215	7.98883e-212
Mt0003_10440	Medtr4g060730	NCR074= NCRa	11.56	14.93	21.73	0.55	2.15	1.06	83.4	118.52	162.61	1.45	2.21	2.84	-4.39357	-2.79581	-4.35755	-5.84592	-5.74494	-5.83938	-3.6808	1.59e-14	4.39e-12	-5.8095	3.12116e-76	2.51553e-74
Mt0006_01107	Medtr3g065050	NCR077-TC35353	0.79	0.53	1.54	0.22	0.16	0.43	2.48	1.17	1.8	0.13	0.06	0.23	-1.84435	-1.72792	-1.84052	-4.25376	-4.2854	-2.96829	-1.82	0.00644783	0.0989567	-3.6978	1.38312e-11	1.12017e-10
Mt0063_00044	Medtr5g076255	NCR083-TC31652	36.88	31.52	40.41	6.65	8.02	11.71	95.12	79.7	112.75	3.2	3.41	3.91	-2.47141	-1.97459	-1.78697	-4.8936	-4.54674	-4.84982	-2.0443	2.79e-14	7.28e-12	-4.7727	1.77017e-149	5.66746e-147
Mt0006_11061	Medtr3g065710	NCR084-TC36391 NCRc	322.94	283.78	387.16	231.1	214.34	264.46	275.72	213.76	280.14	76.66	88.22	102.61	-0.482749	-0.404872	-0.54988	-1.84666	-1.27681	-1.44898	-0.4855	0.0115908	0.154641	-1.5247	3.32853e-20	4.54634e-19
Mt0008_00496	Medtr5g063600	NCR088-TC38212	78.26	64.46	84.86	39.6	34.35	50.86	74.58	63.98	80.92	14.94	16.38	17.22	-0.982775	-0.908094	-0.738553	-2.31961	-1.96569	-2.23241	-0.8666	0.000110776	0.00355674	-2.1768	1.27467e-54	5.97091e-53
Mt0008_10154	Medtr5g055370	NCR094-TC35791	72.84	56.56	96.48	51.84	36.08	63.63	73.72	69.35	115.52	19.33	16.38	26.39	-0.490665	-0.648583	-0.600523	-1.93121	-2.08196	-2.13008	-0.5758	0.0642431	0.484178	-2.058	4.33635e-16	4.72611e-15
Mt0093_10046	Medtr6g038530	NCR095-TC39812	42.99	34.63	48.68	16.37	17.19	21.6	29.5	26.21	34.08	7.25	6.21	9.11	-1.39295	-1.01045	-1.1723	-2.02466	-2.07745	-1.9034	-1.1952	3.7e-08	3.11e-06	-1.9921	3.63347e-26	6.60765e-25
Mt0017_00278	Medtr3g011830	NCR099-TC33084	11.36	9.15	12.24	6	5.07	7.43	16.21	17.15	22.95	2.7	2.61	2.29	-0.920928	-0.851786	-0.720169	-2.58585	-2.71609	-3.32507	-0.824	0.000625624	0.0154319	-2.8893	1.48481e-44	5.35851e-43
Mt0008_10852	Medtr5g072450	NCR100-TC32805	5.73	6.87	5.78	1.78	1.99	3.15	43.7	41.09	57	0.84	1.01	1.16	-1.68666	-1.78754	-0.875718	-5.7011	-5.34636	-5.61877	-1.4093	2.91e-06	0.0001538	-5.5578	8.4864e-125	1.64532e-122
Mt0017_00231	Medtr3g010490	NCR101-TC37320	166.67	161.5	175.62	72.4	54.2	96.77	342.59	295.4	349.11	33.39	31.96	27.14	-1.20293	-1.57517	-0.859825	-3.359	-3.20833	-3.68519	-1.1734	1.57e-06	8.89e-05	-3.4158	2.32071e-201	1.58801e-198
Mt0034_10149	Medtr8g467170	NCR104-TC38808	116.03	107.51	121.23	12.55	16.19	24.85	233.55	260.23	273.87	10.35	8.05	10.76	-3.20874	-2.7313	-2.28643	-4.49603	-5.01465	-4.66974	-2.6856	3.89e-21	2.36e-18	-4.7184	1.62654e-190	9.01e-188
Mt0003_01633	Medtr4g088255	NCR116-TC34696	77.88	66.71	80.59	23.75	25.72	33.7	160.06	197.71	206.36	13.46	15.86	18.03	-1.71333	-1.37501	-1.25785	-3.57186	-3.63992	-3.51669	-1.4369	6.1e-12	1.16e-09	-3.5746	8.03864e-80	7.10208e-78
Mt0004_00962	Medtr1g071880	NCR126-TC35500	44.84	43.25	47.76	21.51	22.42	28.46	75.72	77.03	96.42	7.49	8.82	8.22	-1.05978	-0.947914	-0.746867	-3.33764	-3.12657	-3.55212	-0.9082	6.85e-07	4.24e-05	-3.3445	2.6663e-90	2.85223e-88
Mt0013_10245	Medtr3g031340	NCR133-TC36625	1.72	1.69	1.44	0.03	0.03	0.27	8.38	4.24	7	0.03	0.06	0.14	-5.8413	-5.81592	-2.41504	-8.12584	-6.14296	-5.64386	-3.8774	2.63e-08	2.31e-06	-6.4145	2.38048e-27	4.58465e-26
Mt0022_00281	Medtr7g056030	NCR137-TC34482	12.11	14.67	15.23	7.05	7.25	10.18	16.36	13.53	20.35	3.07	3.66	4.51	-0.780504	-1.01682	-0.581178	-2.41386	-1.88625	-2.17383	-0.7791	0.000976752	0.0221956	-2.1602	7.80455e-22	1.15506e-20
Mt0008_10678	Medtr5g068810	NCR144-TC29276	172.22	146.47	160.42	85.14	98.64	122.05	240.43	260.78	275.26	33.32	45.45	40.74	-1.01634	-0.57036	-0.394382	-2.85116	-2.52048	-2.75628	-0.6476	0.00295929	0.0544009	-2.6998	3.63968e-58	1.89579e-56
Mt0021_10196	Medtr7g008985	NCR147-TC29568	3.81	4.56	5.48	1.08	1.03	1.89	21.01	14.29	27.32	0.51	0.8	1.01	-1.81876	-2.14639	-1.53579	-5.36444	-4.15886	-4.75753	-1.7918	1.08e-07	8.14e-06	-4.7544	2.53699e-50	1.07971e-48
Mt0022_00172	Medtr7g056700	NCR148-TC30863	4.08	4.06	4.6	2.65	1.73	3.98	16.88	13.71	21.46	0.91	1.6	1.68	-0.622577	-1.23071	-0.208865	-4.2133	-3.09908	-3.67512	-0.6078	0.0990108	0.623841	-3.6349	2.97967e-40	9.41888e-39
Mt0048_00148	Medtr2g073090	NCR153-TC35251	7.68	7.04	7.16	2.65	2.69	3.75	10.98	11.44	13.38	0.84	1.41	1.36	-1.53511	-1.38797	-0.933069	-3.70834	-3.02032	-3.2984	-1.2673	9.53e-08	7.24e-06	-3.3099	3.90919e-43	1.34805e-41
Mt0044_00074	Medtr3g018865	NCR155-TC37055	6.31	5.48	7.06	3.66	2.34	3.05	2.75	1.57	2.74	0.61	0.98	0.75	-0.785796	-1.22767	-1.21086	-2.17255	-0.679911	-1.86921	-1.0586	1.27e-05	0.000555434	-1.5932	2.47112e-06	1.20175e-05
Mt0072_00131	Medtr2g063130	NCR160-TC32342	20.48	17.97	21.96	11.75	11.13	15.39	51.61	62.08	69.69	3.54	5.78	8.51	-0.801555	-0.691137	-0.512885	-3.86583	-3.42499	-3.03372	-0.6586	0.0022643	0.0438445	-3.3625	6.81687e-29	1.40933e-27
Mt0026_00206	Medtr7g071720	NCR164-TC36556	359.24	298.78	357.61	161.75	141.07	198.05	239.92	259.9	308.47	59.53	68.62	75.23	-1.15118	-1.08267	-0.852522	-2.01086	-1.92126	-2.03575	-1.0199	1.99e-07	1.4e-05	-1.9907	5.48413e-32	1.28879e-30
Mt0131_10003	Medtr6g453200	NCR166-TC37420	430.56	394.4	451.33	219.38	235.61	282.01	379.02	403.72	429.58	96.09	95.48	99.57	-0.972782	-0.743259	-0.678436	-1.97982	-2.08008	-2.10914	-0.7922	5.07e-06	0.000250766	-2.058	3.17599e-70	2.22116e-68
Mt0035_10302	Medtr7g027120	NCR167-TC42039	92.87	83.39	104.52	45.44	45.57	58.29	75.45	83.68	88.79	16.93	18.38	19.59	-1.03125	-0.87179	-0.842459	-2.15594	-2.18675	-2.18028	-0.9112	1.41e-06	8.08e-05	-2.175	2.46637e-50	1.05093e-48
Mt0026_00206	Medtr7g071690	NCR168-TC35186	359.24	298.78	357.61	161.75	141.07	198.05	239.92	259.9	308.47	59.53	68.62	75.23	-1.15118	-1.08267	-0.852522	-2.01086	-1.92126	-2.03575	-1.0199	1.99e-07	1.4e-05	-1.9907	5.48413e-32	1.28879e-30
Mt0143_10009	Medtr7g029760	NCR169-TC41305	6.48	6.05	8.01	3.11	2.5	3.78	14.59	13.71	18.1	1.32	0.83	1.62	-1.05908	-1.27501	-1.08342	-3.46637	-4.04597	-3.48192	-1.1292	5.91e-06	0.00028609	-3.6215	1.38852e-47	5.44457e-46
Mt0097_00002	Medtr0386s0010	NCR183-TC33762	18.39	15.36	18.58	14.8	9.08	12.14	16.44	12.39	17.99	4.42	3.96	4.57	-0.313324	-0.758414	-0.613982	-1.89509	-1.6456	-1.97693	-0.5388	0.0210126	0.234137	-1.8542	4.2462e-25	7.38335e-24
Mt0006_00214	Medtr3g084910	NCR193-TC34601	32.08	43.68	37.88	5.02	6.93	7.6	224.77	232.59	300.25	8.7	7.65	10.68	-2.67591	-2.65605	-2.31737	-4.69129	-4.92619	-4.81318	-2.5392	1.62e-27	1.97e-24	-4.8088	2.91936e-137	7.38259e-135
Mt0008_10398	Medtr5g062510	NCR194-TC40662	26.62	25.11	30.4	12.71	12.22	17.32	213.68	186.41	237.95	9	8.6	8.91	-1.06655	-1.03902	-0.811632	-4.56938	-4.438	-4.73909	-0.959	6.97e-06	0.000329145	-4.589	2.37874e-260	5.53421e-257
Mt0134_10017	Medtr2g450150	NCR208-TC34426	16.88	15.33	17.5	2.74	2.57	5.41	34.22	28.08	34.57	1.55	1.91	1.85	-2.62307	-2.57652	-1.69365	-4.4645	-3.8779	-4.22392	-2.2132	2.14e-11	3.6e-09	-4.1893	2.68605e-126	5.41836e-124
Mt0034_10128	Medtr3g466130	NCR212-TC42959	5.83	7.4	7.45	1.78	1.31	2.42	51.1	59.59	71.53	0.64	1.84	2.08	-1.71162	-2.49796	-1.62223	-6.31911	-5.01729	-5.10389	-1.9081	1.52e-11	2.65e-09	-5.3205	9.24879e-54	4.2469e-52
Mt0043_10241	Medtr3g030420	NCR221-TC42842	12.56	12.06	13.39	4	3.98	6.2	30.53	33.78	42.06	1.11	1.29	1.82	-1.65076	-1.59939	-1.11082	-4.7816	-4.71073	-4.53044	-1.4225	1.07e-08	9.98e-07	-4.6557	4.8583e-82	4.43835e-80
Mt0093_00029	Medtr6g038290	NCR222-TC37121	1.17	1.59	1.48	0.43	0.38	0.6	7.04	9.14	8.46	0.17	0.22	0.43	-1.4441	-2.06496	-1.30256	-5.37197	-5.37662	-4.29825	-1.5884	9.92e-05	0.00323288	-4.9092	4.57421e-42	1.5305e-40
Mt0005_01059	Medtr5g026080	NCR227-TC31838	3.36	2.18	3.41	0.8	0.96	1.46	10.35	11.7	14.39	0.54	0.37	0.32	-2.07039	-1.18322	-1.2238	-4.26053	-4.98284	-5.49085	-1.4748	0.000113966	0.00364255	-4.8888	5.44216e-57	2.73267e-55
Mt0051_00197	Medtr0048s0180	NCR230-TC38228	55.72	39.85	58.3	27.32	28.32	30.35	23.88	25.01	26.35	8.06	9.43	11.46	-1.02824	-0.492758	-0.941799	-1.56695	-1.40718	-1.2012	-0.8395	6.34e-05	0.00221812	-1.3779	8.45646e-15	8.54906e-14
Mt0056_00076	Medtr2g044330	NCR238-TC29155	196.03	207.42	207.3	27.14	31.97	45.95	604.11	648.3	735.93	20	20.5	25	-2.85258	-2.69776	-2.17358	-4.91674	-4.98297	-4.87957	-2.5394	2.47e-26	2.72e-23	-4.9239	2.44796e-200	1.64287e-197
Mt0025_00066	Medtr6g006245	NCR245-TC29401	26.18	24.78	28.82	6.49	7.41	8.39	71.08	84.74	99.99	2.63	3.78	4.4	-2.01217	-1.74163	-1.78033	-4.75631	-4.48658	-4.50621	-1.8396	2.27e-25	2.42e-22	-4.5646	2.94322e-82	2.71009e-80
Mt0031_00204	Medtr7g102170	NCR271-TC34716	18.29	14.97	14.15	9.42	9.01	10.98	8.85	8.12	8.67	2.73	3.38	3.1	-0.957256	-0.732475	-0.365924	-1.69678	-1.26446	-1.48376	-0.6889	0.00124167	0.0270823	-1.4771	1.36062e-18	1.71481e-17
Mt0054_10215	Medtr6g463200	NCR001	502.64	531.51	528.05	177.65	174.9	244.46	2531.14	3070.01	3403.79	95.55	114.13	140.05	-1.50049	-1.60357	-1.11108	-4.72739	-4.74949	-4.60313	-1.3878	5.06e-13	1.13e-10	-4.6864	2.34493e-113	3.77113e-111
Mt0022_00461	Medtr7g051290	NCR035	11.97	9.12	14.44	3.97	3.4	4.48	25.18	20.25	38.1	1.59	1.75	2.78	-1.59221	-1.4235	-1.6885	-3.98518	-3.5325	-3.77663	-1.5842	1.92e-10	2.67e-08	-3.7707	5.70768e-36	1.54889e-34
Mt0143_10009	Medtr7g029760	NCR169	6.48	6.05	8.01	3.11	2.5	3.78	14.59	13.71	18.1	1.32	0.83	1.62	-1.05908	-1.27501	-1.08342	-3.46637	-4.04597	-3.48192	-1.1292	5.91e-06	0.00028609	-3.6215	1.38852e-47	5.44457e-46
Mt0014_10127	Medtr4g035725	NCR178	29.57	28.48	33.25	11.88	13.15	16.32	20.97	17.29	21.53	4.59	4.46	4.6	-1.3156	-1.11489	-1.02671	-2.19176	-1.95482	-2.22664	-1.1427	4.7e-09	4.8e-07	-2.131	1.61356e-49	6.72758e-48
Mt0059_10098	Medtr5g056815	NCR247	183.55	161.53	201.62	102.8	111.05	125.93	228.67	253.79	303.2	42.97	49.23	55.59	-0.836333	-0.540593	-0.679017	-2.41187	-2.36603	-2.44737	-0.6861	8.81e-05	0.00293057	-2.4104	3.06973e-41	1.00213e-39
Mt0010_10133	Medtr5g080400	MtLb	272.78	304.36	306.53	95.9	95.34	117	1244.95	1313.64	1473.98	39.8	51.2	59.17	-1.50814	-1.67463	-1.38952	-4.96718	-4.68128	-4.63871	-1.5195	1.98e-24	1.83e-21	-4.747	5.61811e-136	1.3905e-133
Mt0012_10297	Medtr5g041610	MtLb	400.23	430.81	427.73	61.44	68.66	95.51	1334.84	1298.47	1313.94	37.54	44.19	51.94	-2.70358	-2.64951	-2.16298	-5.15209	-4.87695	-4.66091	-2.4801	1.37e-30	2.3e-27	-4.8841	2.20052e-206	1.66943e-203
Mt0012_10297	Medtr5g081030	MtLb	400.23	430.81	427.73	61.44	68.66	95.51	1334.84	1298.47	1313.94	37.54	44.19	51.94	-2.70358	-2.64951	-2.16298	-5.15209	-4.87695	-4.66091	-2.4801	1.37e-30	2.3e-27	-4.8841	2.20052e-206	1.66943e-203
Mt0002_11840	Medtr1g049330	MtLb	1103.61	983.43	1141.54	440.84	419.42	568.73	1858.94	1765.84	1759.08	169.17	201.37	187.62	-1.3239	-1.22943	-1.00517	-3.45793	-3.13243	-3.22894	-1.1759	2.58e-10	3.44e-08	-3.2699	5.8352e-167	2.28805e-164
Mt0010_10133	Medtr5g080440	MtLb	272.78	304.36	306.53	95.9	95.34	117	1244.95	1313.64	1473.98	39.8	51.2	59.17	-1.50814	-1.67463	-1.38952	-4.96718	-4.68128	-4.63871	-1.5195	1.98e-24	1.83e-21	-4.747	5.61811e-136	1.3905e-133
Mt0039_00027	Medtr1g090820	MtLb	1119.77	934.27	1158.68	462.44	513.22	605.29	1594.55	1587.69	1592	187.89	218.7	203.97	-1.27586	-0.864262	-0.936784	-3.08519	-2.8599	-2.96441	-1.023	7.43e-08	5.79e-06	-2.9671	1.2957e-142	3.73698e-140
Mt0012_10297	Medtr7g110180	MtLb	400.23	430.81	427.73	61.44	68.66	95.51	1334.84	1298.47	1313.94	37.54	44.19	51.94	-2.70358	-2.64951	-2.16298	-5.15209	-4.87695	-4.66091	-2.4801	1.37e-30	2.3e-27	-4.8841	2.20052e-206	1.66943e-203
Mt0002_10177	Medtr1g011540	MtLb2	370.93	450.56	405.74	64	72.79	103.1	1531.29	1519.07	1496.45	47.66	69.17	65.89	-2.535	-2.62991	-1.97651	-5.00582	-4.4569	-4.50534	-2.355	5.35e-24	4.71e-21	-4.6371	2.74581e-150	8.95546e-148
Mt0008_10574	Medtr5g066070	MtLb1	4599.9	4697.21	4373.47	1907.28	1869.39	2547.1	22418.9	25648.1	25511	980.76	1038.56	949.17	-1.27009	-1.32924	-0.779923	-4.51467	-4.6262	-4.74831	-1.1122	4.11e-09	4.25e-07	-4.6315	1.42725e-289	4.52802e-286
Mt0013_00713	Medtr3g055520	MtCaML1 &3	100.73	103.91	108.43	30.18	27.03	45.45	317.45	302.89	314.64	14.33	16.38	16.23	-1.73883	-1.9427	-1.25441	-4.46942	-4.20879	-4.27697	-1.6086	2.17e-11	3.61e-09	-4.316	3.76856e-298	1.46128e-294
Mt0013_00715	Medtr3g055490	MtCAML4	10.98	16.06	18.12	4.71	4.49	6.83	102.79	85.33	103.67	3.1	3.04	2.34	-1.22108	-1.83868	-1.40763	-5.05129	-4.81091	-5.46935	-1.4943	1.1e-07	8.22e-06	-5.1047	5.92852e-245	8.62057e-242
Mt0013_00714	Medtr3g055510	MtCAML5	57.33	62.94	68.21	37.72	24.63	47.9	221.82	186.05	178	13.86	19.91	19.97	-0.603961	-1.35356	-0.509958	-4.00039	-3.22413	-3.15597	-0.7736	0.00494704	0.0805197	-3.4465	6.80793e-79	5.8518e-77
