# Supplementary material for: Dual RNA-Seq Analysis Pinpoints to a BalancedRegulation between Symbiosis and Immunity in the Medicago truncatula-Sinorhizobium meliloti Symbiotic Interactions
Source: Preprints.org preprint supplement (doi:10.20944/preprints202309.0662.v1), 2023-09-11
Supplement: Supplementary file 11 [file Table S8.xlsx]

## Sheet: 6 dpi
Table S8:Expression of rhizobia genes involved in symbiotic nitrogen fixation.
Gene ID	Gene Name	WT-6dpi_CPM	WT-6dpi_CPM	WT-6dpi_CPM	nad1-1-6dpi_CPM	nad1-1-6dpi_CPM	nad1-1-6dpi_CPM	WT-6dpi_mean	nad1-1-6dpi_mean	Log2FC	PValue	FDR
SMa0822	fixA	6870.46	8643.12	6377.18	351.03	538.93	584.02	7296.92	491.327	-3.8925	1.18895e-131	3.69408e-128
SMa0819	fixB	4796.89	6216.73	4466.09	247.4	321.04	424.82	5159.9	331.087	-3.9621	3.00752e-122	4.67218e-119
SMa0817	fixC	3737.17	4692.12	3657.72	235.03	345.84	331.91	4029	304.26	-3.727	1.80385e-157	1.12091e-153
SMa1211	fixG	1613.6	1327.44	1334.12	842.53	723.44	872.52	1425.05	812.83	-0.81	8.64159e-16	2.16528e-14
SMa1210	fixH	168.03	132.72	124.96	89.06	76.03	82.73	141.903	82.6067	-0.7806	5.1531e-12	8.0862e-11
SMa1209	fixI1	723.87	531.11	555.24	376.32	391.51	406.24	603.407	391.357	-0.6246	2.54324e-11	3.6414e-10
SMa0621	fixI2	13.33	12.84	19.66	48.38	47.06	46.55	15.2767	47.33	1.6314	8.01359e-11	1.0732e-09
SMa1227	fixJ	20.19	23.21	26.66	24.46	25.27	25.62	23.3533	25.1167	0.105	0.291203	0.482249
SMa0762	fixK2	1346.17	1175.79	1208.4	971.45	670.59	809.54	1243.45	817.193	-0.6056	1.06811e-09	1.2314e-08
SMa1229	fixL	111.76	94.19	118.53	106.66	117.52	95.84	108.16	106.673	-0.02	0.0102868	0.0327975
SMa1223	fixM	781.12	788.89	672.82	522.01	423.5	505.98	747.61	483.83	-0.6278	1.71201e-11	2.48561e-10
SMa1220	fixN1	2309.24	1863.51	1967.05	875.24	932.53	925.52	2046.6	911.097	-1.1676	1.964e-34	2.65311e-32
SMa0765	fixN2	3260.54	2854.3	2730.81	1353.54	1194.69	1293.81	2948.55	1280.68	-1.2031	8.21251e-33	1.04148e-30
SMa0612	fixN3	65.68	67.83	81.1	213.59	202.36	191.09	71.5367	202.347	1.5001	2.83952e-19	1.10974e-17
SMa1216	fixO1	700.54	507	576.22	275.71	351.87	336.41	594.587	321.33	-0.8878	3.96596e-17	1.23841e-15
SMa0766	fixO2	896.8	797.01	779.64	359.28	301.34	405.26	824.483	355.293	-1.2145	4.72768e-25	3.41603e-23
SMa0615	fixO3	10.39	7.44	15.5	36.83	39.17	38.14	11.11	38.0467	1.7759	4.67018e-10	5.70148e-09
SMa1213	fixP1	850.13	618.54	703.07	288.36	401.94	371.03	723.913	353.777	-1.033	5.85393e-20	2.56171e-18
SMa0769	fixP2	709.95	613.58	607.98	296.88	328.23	294.95	643.837	306.687	-1.0699	3.24209e-32	4.02926e-30
SMa0617	fixP3	14.9	13.07	17.39	32.99	35.7	35.99	15.12	34.8933	1.2065	1.45961e-05	9.09728e-05
SMa1214	fixQ1	0.2	0.45	0.19	0.27	0.7	0	0.28	0.323333	0.2076	0.920773	0.96487
SMa0767	fixQ2	1.37	1.13	0.76	0.55	0.23	0.2	1.08667	0.326667	-1.734	0.051904	0.128755
SMa0616	fixQ3	0	0	0	0	0	0	0.001	0.001	0	1	1
SMa1208	fixS1	2.74	2.25	1.89	0.55	0.7	0.98	2.29333	0.743333	-1.6254	0.00842359	0.0276807
SMa0622	fixS2	1.37	1.8	1.89	5.22	5.33	4.5	1.68667	5.01667	1.5726	0.012103	0.0376416
SMa1226	fixT1	83.13	62.87	55.2	34.91	41.03	41.86	67.0667	39.2667	-0.7723	5.19326e-09	5.53533e-08
SMa0760	fixT2	39.6	40.33	27.79	25.01	29.67	26.8	35.9067	27.16	-0.4028	0.00032733	0.00149122
SMc03254	fixT3	19.02	24.79	20.04	17.32	20.86	22.49	21.2833	20.2233	-0.0737	0.0822894	0.18527
SMa0810	fixU	510.94	547.34	461.47	72.84	58.88	104.83	506.583	78.85	-2.6836	1.55649e-57	4.60574e-55
SMa0816	fixX	547.21	655.5	511.57	40.68	71.63	61.61	571.427	57.9733	-3.3011	1.15177e-104	8.94636e-102
SMa0815	nifA	9615.55	10471.7	8793.6	2616.64	2071.35	2663.31	9626.95	2450.43	-1.974	8.13664e-57	2.29823e-54
SMa0814	nifB	4346.34	4840.17	4099.9	791.12	634.43	857.65	4428.8	761.067	-2.5408	6.39155e-83	2.64781e-80
SMa0827	nifD	6639.5	7093.5	6181.7	348.56	616.58	588.72	6638.23	517.953	-3.6799	3.08437e-126	6.38877e-123
SMa0830	nifE	3738.74	4276.61	3319.32	201.22	391.97	358.9	3778.22	317.363	-3.5735	3.90936e-100	2.42927e-97
SMa0825	nifH	6780.67	8681.2	6234.83	352.4	573.47	606.13	7232.23	510.667	-3.824	2.49235e-118	3.09749e-115
SMa0829	nifK	3931.27	4065.69	3531.05	197.37	428.36	394.89	3842.67	340.207	-3.4976	5.21089e-86	2.49081e-83
SMa0873	nifN	1080.31	1004.99	1163.97	110.78	141.17	181.11	1083.09	144.353	-2.9075	1.06587e-90	5.51944e-88
SMc00529	nifS	1253.04	1350.2	1540.94	3002.03	2583.39	2686.2	1381.39	2757.21	0.9971	1.2693e-08	1.2888e-07
SMa0831	nifX	1357.54	1715.46	1249.05	82.74	116.59	137.11	1440.68	112.147	-3.6833	7.38903e-117	7.65257e-114

## Sheet: 10 dpi
Table S8:Expression of rhizobia genes involved in symbiotic nitrogen fixation.
Gene ID	Gene Name	WT-10dpi_CPM	WT-10dpi_CPM	WT-10dpi_CPM	nad1-1-10dpi_CPM	nad1-1-10dpi_CPM	nad1-1-10dpi_CPM	WT-10dpi_mean	nad1-1-10dpi_mean	Log2FC	PValue	FDR
SMa0822	fixA	31355.6	29290.5	31470.3	2907.06	4316.95	3122.63	30705.4	3448.88	-3.1543	1.5229e-198	1.35364e-195
SMa0819	fixB	21783.6	20485.5	21892	2153.86	3445.91	2566.63	21387	2722.13	-2.9739	6.03137e-164	1.70578e-161
SMa0817	fixC	15314.9	14824.7	15884	1908.74	2895.01	2411	15341.2	2404.92	-2.6734	2.28862e-158	5.93326e-156
SMa1211	fixG	1372.83	1242.41	1410.43	1209.76	1169.06	1167.85	1341.89	1182.22	-0.1828	8.19104e-23	8.34118e-22
SMa1210	fixH	121.97	107.43	118.82	129.34	119.76	117.98	116.073	122.36	0.0761	1.46296e-08	6.18799e-08
SMa1209	fixI1	472.31	421.26	459.21	560.73	501.16	515.84	450.927	525.91	0.2219	7.54973e-08	2.98819e-07
SMa0621	fixI2	12.46	14.84	19.94	54.99	59.42	60.87	15.7467	58.4267	1.8916	9.08347e-09	3.90583e-08
SMa1227	fixJ	16.09	16.54	15.25	27.88	28.56	32	15.96	29.48	0.8853	0.581476	0.662506
SMa0762	fixK2	1918.32	1874.23	1976.95	1209.37	1143.26	1036.06	1923.17	1129.56	-0.7677	6.63907e-55	2.16274e-53
SMa1229	fixL	83.95	73.7	84.3	103.01	99.49	101.03	80.65	101.177	0.3271	0.000636487	0.00154878
SMa1223	fixM	1971	2182.98	2142.6	810.12	849.85	784.42	2098.86	814.797	-1.3651	1.97529e-108	1.9823e-106
SMa1220	fixN1	2377.14	2195.74	2464.93	1340.26	1272.7	1419.49	2345.94	1344.15	-0.8035	1.45134e-58	5.18979e-57
SMa0765	fixN2	5277.47	5072.26	5492.92	2478.38	2684.97	2517.05	5280.88	2560.13	-1.0446	1.74682e-86	1.15624e-84
SMa0612	fixN3	104.06	104.17	116.68	274.94	228.93	261.06	108.303	254.977	1.2353	0.000115221	0.000311292
SMa1216	fixO1	551.73	475.17	529.06	357.04	354.22	384.68	518.653	365.313	-0.5056	3.19523e-35	5.04586e-34
SMa0766	fixO2	1675.29	1452.71	1631.87	735.38	742.06	668.95	1586.62	715.463	-1.149	2.36024e-80	1.37247e-78
SMa0615	fixO3	12.59	12.89	14.72	57.7	45.14	62.75	13.4	55.1967	2.0423	1.70471e-11	9.06555e-11
SMa1213	fixP1	666.17	613.98	661.66	487.54	443.12	385.31	647.27	438.657	-0.5613	2.41174e-33	3.56433e-32
SMa0769	fixP2	1414.61	1321.84	1396.78	652.9	668.82	655.78	1377.74	659.167	-1.0636	1.13315e-90	8.29463e-89
SMa0617	fixP3	18.56	18.49	17.8	53.44	52.05	50.2	18.2833	51.8967	1.5051	1.22876e-05	3.78859e-05
SMa1214	fixQ1	0.39	0	0.27	0	0	1.26	0.22	0.42	0.9329	0.969384	0.978449
SMa0767	fixQ2	2.08	1.69	0.54	0.77	0.92	0	1.43667	0.563333	-1.3507	0.0432759	0.0729314
SMa0616	fixQ3	0.13	0	0	0.39	0	0	0.0433333	0.13	1.585	0.695039	0.758024
SMa1208	fixS1	3.5	1.82	3.21	1.55	0.46	1.26	2.84333	1.09	-1.3833	0.00258496	0.00565926
SMa0622	fixS2	0.91	1.82	1.2	9.29	5.07	10.04	1.31	8.13333	2.6343	7.06629e-05	0.000196016
SMa1226	fixT1	40.61	30.99	36.53	45.7	53.43	44.56	36.0433	47.8967	0.4102	0.0348608	0.0603201
SMa0760	fixT2	23.49	17.32	23.68	27.11	24.41	30.75	21.4967	27.4233	0.3513	0.0394662	0.0672027
SMc03254	fixT3	67.73	66.8	69.85	25.56	22.57	21.34	68.1267	23.1567	-1.5568	1.47719e-40	2.96486e-39
SMa0810	fixU	1459.37	1489.7	1457.79	333.81	379.55	379.03	1468.95	364.13	-2.0123	6.1276e-185	3.17716e-182
SMa0816	fixX	2147.08	2182.72	2130.96	297.41	447.26	344.52	2153.59	363.063	-2.5684	3.54163e-153	8.4754e-151
SMa0815	nifA	24712.2	25753.8	24950.3	6563.05	7705.28	6722.81	25138.7	6997.05	-1.8451	2.01044e-167	5.95664e-165
SMa0814	nifB	12154.3	11476	11224.4	3049.18	3466.18	2992.1	11618.2	3169.15	-1.8742	5.05947e-179	2.24857e-176
SMa0827	nifD	31231	30183.5	32281	3257.13	5267.21	4223.95	31231.8	4249.43	-2.8777	1.57025e-155	3.90803e-153
SMa0830	nifE	17582.9	18124.4	18069.5	2591.06	4001.42	3241.86	17925.6	3278.11	-2.4511	5.99015e-136	1.12942e-133
SMa0825	nifH	41751	38632.7	42781.4	3253.26	5242.34	4166.22	41055.1	4220.61	-3.282	1.47434e-189	8.33941e-187
SMa0829	nifK	17333.2	16581.3	17648.9	2309.15	3884.89	3153.37	17187.8	3115.8	-2.4637	4.96041e-114	6.29871e-112
SMa0873	nifN	957.22	727.14	805.5	379.5	436.67	404.13	829.953	406.767	-1.0288	3.0415e-55	1.00661e-53
SMc00529	nifS	639.57	634.29	522.91	3211.82	3116.57	3208.6	598.923	3179	2.4081	1.36763e-67	5.95062e-66
SMa0831	nifX	6285.55	6147.34	6419.78	892.6	1440.36	1155.3	6284.22	1162.75	-2.4342	1.92215e-122	2.7813e-120
