# Supplementary material for: Dual RNA-Seq Analysis Pinpoints to a BalancedRegulation between Symbiosis and Immunity in the Medicago truncatula-Sinorhizobium meliloti Symbiotic Interactions
Source: Preprints.org preprint supplement (doi:10.20944/preprints202309.0662.v1), 2023-09-11
Supplement: Supplementary file 12 [file Table S9.xlsx]

## Sheet: 6 dpi
Table S9: List of plant genes involved in defense.
Gene ID (Mt20120830-LIPM）	Gene ID（Mt4.0v1-JCVI）	Gene Name	WT-6dpi_CPM	WT-6dpi_CPM	WT-6dpi_CPM	nad1-1-6dpi_CPM	nad1-1-6dpi_CPM	nad1-1-6dpi_CPM	WT-6dpi_mean	nad1-1-6dpi_mean	Log2FC	PValue	FDR
Mt0019_10333	Medtr2g087285	AMLT	28.17	32.68	19.56	27.48	25.72	44.88	26.8033	32.6933	0.2866	0.268866	0.951088
Mt0023_10383	Medtr2g008360	BAK1-like	121.48	115.11	106.1	128.89	136.93	148.55	114.23	138.123	0.274	0.0230031	0.249374
Mt0004_10560	Medtr1g061190	CTR1	77.4	63.9	62.93	59.81	102.36	77.63	68.0767	79.9333	0.2316	0.253587	0.934696
Mt0089_00085	Medtr3g118390	CHIB	26.42	24.02	118.83	211.62	169.16	104	56.4233	161.593	1.518	0.0501576	0.414902
Mt0005_00699	Medtr5g019420	DRM2	7.24	6.67	9.16	6.06	6.61	6.37	7.69	6.34667	-0.277	0.245679	0.928365
Mt0062_10049	Medtr4g031150	ETR1	32.73	29.93	58.14	42.4	76.51	36.03	40.2667	51.6467	0.3591	0.24454	0.926538
Mt0067_00070	Medtr7g109150	ERS1	155.93	162.26	214.52	200.92	230.25	168.26	177.57	199.81	0.1702	0.22096	0.894683
Mt0036_00232	Medtr7g116330	EIN4	19.08	24.19	43.27	35.01	26.46	24.22	28.8467	28.5633	-0.0142	0.880576	0.991961
Mt0004_01036	Medtr4g134880	ETR2	78.22	61.88	83.77	68.98	164.7	97	74.6233	110.227	0.5628	0.0642538	0.484178
Mt0007_10925	Medtr3g107280	EBF1	258.65	281	249.12	287.34	390.66	362.62	262.923	346.873	0.3998	0.0107587	0.146189
Mt0002_00905	Medtr1g028300	HAI3	1.06	1.45	0.69	1.05	1.31	1.82	1.06667	1.39333	0.3854	0.307618	0.9804
Mt0015_00307	Medtr8g012390	HMA5	10.6	10.24	11.1	12.98	8.79	9.92	10.6467	10.5633	-0.0113	0.830105	0.982656
Mt0013_00713	Medtr3g055570	MtCaML2	88.07	106.09	99.43	41.32	33.06	57.49	97.8633	43.9567	-1.1547	2.78e-06	0.000147843
Mt0013_00715	Medtr3g055490	MtCAML4	10.98	16.06	18.12	4.71	4.49	6.83	15.0533	5.34333	-1.4943	1.1e-07	8.22e-06
Mt0013_00716	Medtr3g055480	MtCAML6	138.6	132.13	146.24	60.67	43.9	76.4	138.99	60.3233	-1.2042	2.98e-07	2.01e-05
Mt0028_10331	Medtr8g024790	MYC2	17.6	10.7	3.87	6.58	19.66	25.61	10.7233	17.2833	0.6886	0.226382	0.902146
Mt0004_01061	Medtr1g074370	MtERF1	0.34	1.09	1.15	3.38	1.41	1.19	0.86	1.99333	1.2128	0.0286052	0.289687
Mt0040_00139	Medtr3g112210	MPK1	115.93	118.48	139.55	120.73	97.04	107.62	124.653	108.463	-0.2007	0.238984	0.919443
Mt0055_00005	Medtr2g040510	MKK2	4.25	3.17	1.44	6.43	3.53	7.13	2.95333	5.69667	0.9478	0.0306541	0.303969
Mt0042_10089	Medtr6g071280	MKK9	56.61	43.32	54.1	49.57	110.8	54.94	51.3433	71.77	0.4832	0.111444	0.664403
Mt0036_00102	Medtr7g113490	MAPKKK1	50.57	50.91	47.83	24.06	23.35	28.46	49.77	25.29	-0.9767	3.45e-10	4.48e-08
Mt0019_00349	Medtr2g088020	MAPKKK17	1.89	1.78	0.72	1.02	1.67	2.55	1.46333	1.74667	0.2553	0.557367	0.9804
Mt0092_00013	Medtr4g049730	MAPKKK18	2.54	2.21	1.71	2.68	2.98	4.21	2.15333	3.29	0.6115	0.0355634	0.332523
Mt0007_00122	Medtr3g090350	MKS1	30.77	32.21	25.97	37.75	19.11	32.88	29.65	29.9133	0.0128	0.828554	0.982486
Mt0015_10111	Medtr8g007235	NDPK1	662.99	671.2	577.55	541.92	564.08	521.65	637.247	542.55	-0.2321	0.166026	0.801397
Mt0032_10275	Medtr4g082580	WRKY4	2.85	4.36	4.53	7.6	4.68	4.58	3.91333	5.62	0.5222	0.0454559	0.389943
Mt0023_10278	Medtr2g010590	PRB1	0	0.4	0.23	5.14	0.96	0.8	0.21	2.3	3.4532	0.000525772	0.013342
Mt0089_00085	Medtr3g118390	PR-3	26.42	24.02	118.83	211.62	169.16	104	56.4233	161.593	1.518	0.0501576	0.414902
Mt0012_00809	Medtr5g030500	PYL1	6.93	10.34	14.48	12.12	9.36	7.33	10.5833	9.60333	-0.1402	0.787637	0.9804
Mt0002_00411	Medtr1g016480	PYL2	19.38	14.77	21.21	11.26	30.08	22.72	18.4533	21.3533	0.2106	0.454817	0.9804
Mt0026_00132	Medtr7g070050	PYL4	27.31	22.76	27.18	28.65	41.5	27.73	25.75	32.6267	0.3415	0.0745805	0.52946
Mt0006_00824	Medtr3g071740	PYL6	93.42	72.69	113.55	54.98	148.28	82.47	93.22	95.2433	0.031	0.79048	0.9804
Mt0003_01566	Medtr4g086855	SNRK2-6	0.38	0.36	0.66	0.62	0.26	0.3	0.466667	0.393333	-0.2466	0.73182	0.9804
Mt0009_00184	Medtr8g088745	SNRK2-10	28.72	27.98	28.59	21.11	18.12	24.85	28.43	21.36	-0.4125	0.0309719	0.306411
Mt0015_10285	Medtr8g011780	OXI1	35.78	39.05	30.69	57.97	28.22	45.41	35.1733	43.8667	0.3186	0.179476	0.827428
Mt0015_10428	Medtr8g014650	VSP2	28.99	29.77	30.59	37.35	29.79	38.22	29.7833	35.12	0.2378	0.0377989	0.345357
Mt0003_00871	Medtr4g071060	CTSF	15.71	15.56	14.54	31.17	16.45	21.89	15.27	23.17	0.6016	0.0075002	0.110764
Mt0036_00289	Medtr7g117310	CNGC1	34.41	32.51	34.96	60.43	55.32	74.67	33.96	63.4733	0.9023	1.07e-08	9.93e-07
Mt0021_10339	Medtr7g012260	CNGC2	0.27	0.17	0.23	0.62	0.67	0.36	0.223333	0.55	1.3002	0.0217441	0.24016
Mt0046_00167	Medtr8g027755	CNGC13	5.21	5.58	5.38	8.49	1.83	5.21	5.39	5.17667	-0.0583	0.962996	0.999951
Mt0042_00231	Medtr6g075290	CNGC20	24.08	23.06	18.84	34.77	27.45	36.82	21.9933	33.0133	0.586	0.000953653	0.0217831
Mt0042_00071	Medtr7g106710	CPK1	74.41	80.35	39.26	72.3	75.36	89.54	64.6733	79.0667	0.2899	0.260035	0.942764
Mt0042_00073	Medtr7g106730	CPK2	0.24	0.43	0.2	0.31	0.1	0.43	0.29	0.28	-0.0506	0.99658	0.999951
Mt0049_00180	Medtr3g051770	CPK9	73.45	71.5	48.88	80.89	60.51	85.59	64.61	75.6633	0.2278	0.247262	0.929887
Mt0001_11186	Medtr4g107490	CPK30	53.01	53.56	48.85	46.12	67.7	56.89	51.8067	56.9033	0.1354	0.331039	0.9804
Mt0013_10082	Medtr3g062440	CRF4	24.98	24.45	25.28	32.98	34.79	27.93	24.9033	31.9	0.3572	0.00237713	0.0456279
Mt0026_10326	Medtr7g074240	CML42	34.72	33.4	35.06	57.84	42.68	69.3	34.3933	56.6067	0.7188	0.000192896	0.00573833
Mt0089_00085	Medtr3g118390	Chitinase	26.42	24.02	118.83	211.62	169.16	104	56.4233	161.593	1.518	0.0501576	0.414902
Mt0025_00144	Medtr6g007763	DOX	1.03	1.92	5.25	6.15	9.17	6.54	2.73333	7.28667	1.4146	0.00490026	0.0798858
Mt0043_00134	Medtr3g027890	DNF1	690.03	639.35	611.69	556.62	626.45	615.64	647.023	599.57	-0.1099	0.692524	0.9804
Mt0003_11544	Medtr4g085800	DNF2	294.46	267.56	310.14	228.33	246.67	245.82	290.72	240.273	-0.275	0.0758083	0.53542
Mt0006_10531	Medtr3g078633	EDS1	102.07	78.87	89.55	160.21	223.87	174.82	90.1633	186.3	1.047	1.24e-07	9.17e-06
Mt0001_01837	Medtr0602s0020	FLS2	78.19	70.87	108.13	39.11	186.8	62.17	85.73	96.0267	0.1636	0.646809	0.9804
Mt0001_01837	Medtr4g094610	FLS2-like	78.19	70.87	108.13	39.11	186.8	62.17	85.73	96.0267	0.1636	0.646809	0.9804
Mt0011_00459	Medtr7g085810	ERN1	30.43	40.21	28.03	35.72	28.25	30.98	32.89	31.65	-0.0554	0.982507	0.999951
Mt0053_10085	Medtr1g099840	HSP90A	1.99	1.75	3.35	1.88	4.1	3.05	2.36333	3.01	0.3489	0.304447	0.9804
Mt0036_10330	Medtr7g118170	KCS1	19.14	15.4	12.64	21.63	10.49	21.33	15.7267	17.8167	0.18	0.492867	0.9804
Mt0004_01134	Medtr1g076430	KCS2	45.63	35.45	25.6	34.06	29.28	44.15	35.56	35.83	0.0109	0.838266	0.984505
Mt0003_00837	Medtr4g070270	KCS4	212.23	194.93	144.31	198.27	172.14	214.93	183.823	195.113	0.086	0.518874	0.9804
Mt0069_00009	Medtr7g081695	KCS11	12.45	12.22	13.79	9.75	11.38	9.82	12.82	10.3167	-0.3134	0.0935378	0.603736
Mt0004_00211	Medtr1g083290	MtRbohA	132.91	120.83	118.34	100.27	281.08	181.92	124.027	187.757	0.5982	0.0678162	0.500444
Mt0007_00482	Medtr3g098380	MtRbohB	22.13	17.91	23.67	21.66	17.51	17.71	21.2367	18.96	-0.1636	0.505784	0.9804
Mt0007_00481	Medtr3g098350	MtRbohC	3.67	3.04	4.17	41.14	12.22	26.41	3.62667	26.59	2.8742	4.76e-13	1.07e-10
Mt0007_00480	Medtr3g098320	MtRbohD	10.19	11.46	8.34	14.98	17.93	16.12	9.99667	16.3433	0.7092	0.00011097	0.00355973
Mt0004_11003	Medtr3g095520	MtRbohE	71.12	67.07	68.05	70.34	77.73	69.07	68.7467	72.38	0.0743	0.293282	0.978105
Mt0036_10096	Medtr7g113130	MtRbohG	696.44	618.6	386.93	700.96	772.68	912.97	567.323	795.537	0.4878	0.0474652	0.401601
Mt0056_00093	Medtr2g043900	MtRbohH	15.64	14.97	12.15	10.46	7.86	11.71	14.2533	10.01	-0.5099	0.0391823	0.352734
Mt0009_00633	Medtr8g099030	MtRbohI	130.78	132.26	76.81	100.7	95.34	131.73	113.283	109.257	-0.0522	0.995231	0.999951
Mt0001_01092	Medtr4g109530	MtRbohJ	20.34	22.17	23.47	26.31	16.1	22.19	21.9933	21.5333	-0.0305	0.918437	0.999951
Mt0010_01118	Medtr5g099240	MtCDPK5	261.97	255.79	212.39	291.8	280.53	322.85	243.383	298.393	0.294	0.0283142	0.287484
Mt0006_10467	Medtr3g080050	MtLYK9	26.35	26.56	39.36	37.78	47.49	29.29	30.7567	38.1867	0.3122	0.135138	0.73454
Mt0019_10194	Medtr2g084010	Lip	26.45	21.64	94.15	24.77	94.47	34.77	47.4133	51.3367	0.1147	0.806346	0.9804
Mt0010_00186	Medtr5g081000	Lb	1255.28	1322.48	1309.19	372.42	402.91	534.99	1295.65	436.773	-1.5687	8.68e-16	2.83e-13
Mt0064_00097	Medtr4g009920	NHO1	24.29	24.52	39.42	35.17	107.2	28.96	29.41	57.11	0.9574	0.0360901	0.335572
Mt0087_00089	Medtr6g053290	SGT1B	116.95	111.67	123.79	184.79	146.2	161.65	117.47	164.213	0.4833	5.35e-06	0.000262975
Mt0022_10248	Medtr7g056147	RIN4	60.83	54.85	68.02	65.26	107.88	74.91	61.2333	82.6833	0.4333	0.0382543	0.347368
Mt0013_00730	Medtr3g055230	RPS2	0.79	0.86	0.92	1.82	1.64	1.23	0.856667	1.56333	0.8678	0.00513733	0.0829271
Mt0017_10264	Medtr3g011480	RPS3	7.14	7.53	8.44	8.55	10.77	8.76	7.70333	9.36	0.281	0.0604271	0.467089
Mt0039_10068	Medtr1g090690	RPP13	1.37	1.45	2.4	5.32	3.4	4.48	1.74	4.4	1.3384	5.86e-06	0.000284497
Mt0004_10695	Medtr1g064090	PAL	193.77	153.07	329.97	302.3	383.12	263.23	225.603	316.217	0.4871	0.0702066	0.511018
Mt0046_00076	Medtr8g028565	WRKY22	2.13	2.94	8.37	3.82	14.17	4.31	4.48	7.43333	0.7305	0.201652	0.865534
Mt0009_00626	Medtr8g098945	WRKY29-like	5.76	5.85	12.34	7.17	20.24	9.79	7.98333	12.4	0.6353	0.124465	0.702326
Mt0026_10211	Medtr7g071120	WRKY33	167.01	200.85	163.11	261.81	137.19	247.91	176.99	215.637	0.2849	0.199456	0.861147
Mt0013_00226	Medtr3g031220	WRKY33-like	18.29	19.3	25.8	52.55	55.67	47.24	21.13	51.82	1.2942	1.63e-15	5.22e-13
Mt0001_10319	Medtr4g128750	PR1	19.18	32.48	32.96	50.21	14.53	17.22	28.2067	27.32	-0.0461	0.986832	0.999951
Mt0018_00455	Medtr2g035150	PR10	38.05	35.35	133.21	347.71	143.95	134.75	68.87	208.803	1.6002	0.00234045	0.0450712
Mt0002_00419	Medtr1g016780	VPE	37.36	61.85	66.97	327.28	45.99	137.07	55.3933	170.113	1.6187	0.00322844	0.0582841
Mt0005_01158	Medtr5g027860	R (CC-NBS-LRR class)	6.07	8.59	11.78	24.74	18.02	19.01	8.81333	20.59	1.2242	5.71e-07	3.62e-05
Mt0034_10041	Medtr8g470390	R (TIR-NBS-LRR class)	0.69	0.53	8.99	1.2	7.5	1.09	3.40333	3.26333	-0.0606	1	1
Mt0063_00039	Medtr5g076170	NDR1	28.75	31.22	23.41	44.64	45.92	57.89	27.7933	49.4833	0.8322	1.13e-05	0.000507399
Mt0011_10721	Medtr7g079720	PIN9	1.13	1.49	0.92	1.69	0.9	1.76	1.18	1.45	0.2973	0.384831	0.9804
Mt0006_10188	Medtr3g086320	NPL-like	21.44	37.57	40.74	29.29	18.79	20.14	33.25	22.74	-0.5481	0.0761516	0.536607
Mt0024_10162	Medtr6g086170	SST1-like	486.83	488.2	450.9	280.42	287.84	347.1	475.31	305.12	-0.6395	0.000135904	0.00423911
Mt0086_10022	Medtr7g063220	RSD	98.5	87.56	86.63	60.46	47.53	68.24	90.8967	58.7433	-0.6298	0.00167009	0.0344807
Mt0006_00443	Medtr3g079850	SymCRK	402.7	386.93	392.28	264.45	217.97	307.68	393.97	263.367	-0.581	0.00155859	0.0326378
Mt0001_01904	Medtr4g094335	SEN1-like	276.28	248.82	244.98	186.27	158.99	214.83	256.693	186.697	-0.4593	0.0154188	0.190157
Mt0054_10215	Medtr6g463200	NCR001	502.64	531.51	528.05	177.65	174.9	244.46	520.733	199.003	-1.3878	5.06e-13	1.13e-10
Mt0022_00461	Medtr7g051290	NCR035	11.97	9.12	14.44	3.97	3.4	4.48	11.8433	3.95	-1.5842	1.92e-10	2.67e-08

## Sheet: 10 dpi
Table S9: List of plant genes involved in defense.
Gene ID (Mt20120830-LIPM）	Gene ID（Mt4.0v1-JCVI）	Gene Name	WT-10dpi_CPM	WT-10dpi_CPM	WT-10dpi_CPM	nad1-1-10dpi_CPM	nad1-1-10dpi_CPM	nad1-1-10dpi_CPM	WT-10dpi_mean	nad1-1-10dpi_mean	Log2FC	PValue	FDR
Mt0019_10333	Medtr2g087285	AMLT	71.2	82.62	59.74	31.7	25.6	20.14	71.1867	25.8133	-1.4635	3.05561e-15	3.15674e-14
Mt0023_10383	Medtr2g008360	BAK1-like	77.46	92.2	93.13	220.6	209.27	201.94	87.5967	210.603	1.2656	2.61918e-18	3.2505e-17
Mt0004_10560	Medtr1g061190	CTR1	61.13	77.43	66.26	141.21	133.86	141	68.2733	138.69	1.0225	1.62403e-10	1.20228e-09
Mt0089_00085	Medtr3g118390	CHIB	14.59	11.26	13.04	266.71	292.51	322.98	12.9633	294.067	4.5036	8.78752e-203	6.13333e-200
Mt0005_00699	Medtr5g019420	DRM2	4.92	5.67	4.75	2.77	2.55	2.2	5.11333	2.50667	-1.0285	6.94893e-08	4.05051e-07
Mt0062_10049	Medtr4g031150	ETR1	29.19	31.81	37.06	72.58	77.78	102.14	32.6867	84.1667	1.3645	5.40003e-11	4.15454e-10
Mt0067_00070	Medtr7g109150	ERS1	112.43	105.73	109.21	250.79	256.74	286.98	109.123	264.837	1.2791	5.67405e-26	1.02016e-24
Mt0036_00232	Medtr7g116330	EIN4	24.19	13.45	19.66	40.37	44.8	42.94	19.1	42.7033	1.1608	1.23325e-08	7.73505e-08
Mt0004_01036	Medtr4g134880	ETR2	63.33	107.89	81.86	134.03	157.21	223.47	84.36	171.57	1.0242	0.000560572	0.00191305
Mt0007_10925	Medtr3g107280	EBF1	246.92	376.01	317.1	617.05	567.33	775.41	313.343	653.263	1.0599	7.82655e-06	3.56894e-05
Mt0002_00905	Medtr1g028300	HAI3	1.38	1.28	0.97	5.43	3.81	3.73	1.21	4.32333	1.8371	2.6731e-11	2.10911e-10
Mt0015_00307	Medtr8g012390	HMA5	9.83	8.81	9.95	18.28	19.73	19.39	9.53	19.1333	1.0055	1.23227e-12	1.07734e-11
Mt0013_00713	Medtr3g055570	MtCaML2	437.59	441.38	418.83	25.46	30.08	28.53	432.6	28.0233	-3.9483	5.21792e-221	5.20271e-218
Mt0013_00715	Medtr3g055490	MtCAML4	102.79	85.33	103.67	3.1	3.04	2.34	97.2633	2.82667	-5.1047	5.92852e-245	8.62057e-242
Mt0013_00716	Medtr3g055480	MtCAML6	421.66	475.41	530.71	28.33	41.05	42.19	475.927	37.19	-3.6778	5.4854e-71	3.947e-69
Mt0028_10331	Medtr8g024790	MYC2	3.38	18.75	26.73	118.99	74.83	108.86	16.2867	100.893	2.6311	0.00169122	0.00527485
Mt0004_01061	Medtr1g074370	MtERF1	0.98	0.66	0.69	3.47	3.23	3.04	0.776667	3.24667	2.0636	6.00991e-13	5.36129e-12
Mt0040_00139	Medtr3g112210	MPK1	230.95	233.91	257.89	86.61	74.67	77.32	240.917	79.5333	-1.5989	1.72955e-50	7.40589e-49
Mt0055_00005	Medtr2g040510	MKK2	3.38	4.9	4.23	24.72	19.3	19.39	4.17	21.1367	2.3416	1.80137e-30	3.97875e-29
Mt0042_10089	Medtr6g071280	MKK9	33.79	61.42	62.17	129.68	138.87	164.64	52.46	144.397	1.4607	1.98829e-07	1.1063e-06
Mt0036_00102	Medtr7g113490	MAPKKK1	172.34	171.32	175.89	14.6	12.2	10.33	173.183	12.3767	-3.8066	2.38503e-186	1.20627e-183
Mt0019_00349	Medtr2g088020	MAPKKK17	0.94	3.4	2.18	14.06	11.25	11.31	2.17333	12.2067	2.4897	2.95004e-10	2.1399e-09
Mt0092_00013	Medtr4g049730	MAPKKK18	1.65	2.08	1.94	8.94	8.48	8.51	1.89	8.64333	2.1932	7.498e-28	1.47168e-26
Mt0007_00122	Medtr3g090350	MKS1	29.82	34.55	32.7	66.37	86.72	66.15	32.3567	73.08	1.1754	1.48873e-10	1.10657e-09
Mt0015_10111	Medtr8g007235	NDPK1	791.31	706.72	656.5	245.09	233.6	226.71	718.177	235.133	-1.6109	1.73083e-79	1.50629e-77
Mt0032_10275	Medtr4g082580	WRKY4	5.63	4.17	5.03	22.29	21.45	20.8	4.94333	21.5133	2.1217	6.94693e-50	2.92089e-48
Mt0023_10278	Medtr2g010590	PRB1	0.2	0.04	0.17	6.31	5.13	5.76	0.136667	5.73333	5.3906	9.14705e-29	1.87662e-27
Mt0089_00085	Medtr3g118390	PR-3	14.59	11.26	13.04	266.71	292.51	322.98	12.9633	294.067	4.5036	8.78752e-203	6.13333e-200
Mt0012_00809	Medtr5g030500	PYL1	8.14	7.17	8.11	19.12	21.42	25.35	7.80667	21.9633	1.4923	2.65519e-16	2.93045e-15
Mt0002_00411	Medtr1g016480	PYL2	3.78	7.75	6.34	12.34	12.63	26.71	5.95667	17.2267	1.5321	0.000125254	0.00047626
Mt0026_00132	Medtr7g070050	PYL4	22.58	39.74	38.24	70.05	92.96	98.64	33.52	87.2167	1.3796	1.11153e-06	5.67356e-06
Mt0006_00824	Medtr3g071740	PYL6	49.41	102.62	86.19	148.4	169.5	192.8	79.4067	170.233	1.1002	0.000313932	0.00111803
Mt0003_01566	Medtr4g086855	SNRK2-6	0.12	0.11	0.17	0.71	0.37	0.55	0.133333	0.543333	2.0268	0.00333079	0.00977446
Mt0009_00184	Medtr8g088745	SNRK2-10	39.49	35.86	33.8	13.9	12.72	10.91	36.3833	12.51	-1.5402	9.82905e-40	3.04901e-38
Mt0015_10285	Medtr8g011780	OXI1	32.89	24.24	24.58	101.04	148.18	90.22	27.2367	113.147	2.0546	1.3753e-20	1.90911e-19
Mt0015_10428	Medtr8g014650	VSP2	15.46	18.39	24.13	66.85	71.45	62.15	19.3267	66.8167	1.7896	3.00478e-18	3.7132e-17
Mt0003_00871	Medtr4g071060	CTSF	12.16	12.65	11.79	36.32	45.33	55.53	12.2	45.7267	1.9062	5.38367e-20	7.25964e-19
Mt0036_00289	Medtr7g117310	CNGC1	28.87	31.26	32.66	166.88	192.18	160.88	30.93	173.313	2.4863	2.75319e-67	1.78921e-65
Mt0021_10339	Medtr7g012260	CNGC2	0.71	0.55	0.87	0.3	0.15	0.17	0.71	0.206667	-1.7805	0.000663989	0.00223905
Mt0046_00167	Medtr8g027755	CNGC13	19.31	16.85	22.61	7.55	6.12	3.3	19.59	5.65667	-1.7921	4.22778e-12	3.54325e-11
Mt0042_00231	Medtr6g075290	CNGC20	21.01	22.3	23.68	68.73	54.91	56.63	22.33	60.09	1.4281	1.2416e-24	2.09827e-23
Mt0042_00071	Medtr7g106710	CPK1	45.43	61.05	43.1	170.15	209.54	154.57	49.86	178.087	1.8366	2.68114e-18	3.32503e-17
Mt0042_00073	Medtr7g106730	CPK2	0.12	0.22	0.31	1.28	0.65	0.49	0.216667	0.806667	1.8965	0.00358129	0.0104411
Mt0049_00180	Medtr3g051770	CPK9	50.71	62.88	52.22	125.53	116.16	115.05	55.27	118.913	1.1053	4.89784e-13	4.39734e-12
Mt0001_11186	Medtr4g107490	CPK30	33.04	33.52	31.86	96.49	89.39	88.69	32.8067	91.5233	1.4802	5.97939e-50	2.52625e-48
Mt0013_10082	Medtr3g062440	CRF4	14.2	12.14	14.11	29.34	29.72	27.11	13.4833	28.7233	1.091	1.01712e-18	1.29404e-17
Mt0026_10326	Medtr7g074240	CML42	26.55	28.95	22.99	83.78	107.89	80.01	26.1633	90.56	1.7913	1.02165e-22	1.57969e-21
Mt0089_00085	Medtr3g118390	Chitinase	14.59	11.26	13.04	266.71	292.51	322.98	12.9633	294.067	4.5036	8.78752e-203	6.13333e-200
Mt0025_00144	Medtr6g007763	DOX	4.41	3.98	3.5	11.06	17.55	25.38	3.96333	17.9967	2.1829	6.15248e-12	5.09151e-11
Mt0043_00134	Medtr3g027890	DNF1	304.75	299.93	293.46	263.33	243.41	293.44	299.38	266.727	-0.1666	0.0525744	0.11442
Mt0003_11544	Medtr4g085800	DNF2	298.89	305.82	319.81	132.34	134.23	143.29	308.173	136.62	-1.1736	2.03121e-27	3.92498e-26
Mt0006_10531	Medtr3g078633	EDS1	59.48	81.45	73.75	458.78	465.24	492.37	71.56	472.13	2.722	1.45776e-53	6.63272e-52
Mt0001_01837	Medtr0602s0020	FLS2	48.94	70.34	65.22	206.51	224.08	309.93	61.5	246.84	2.0049	1.43071e-16	1.60131e-15
Mt0001_01837	Medtr4g094610	FLS2-like	48.94	70.34	65.22	206.51	224.08	309.93	61.5	246.84	2.0049	1.43071e-16	1.60131e-15
Mt0011_00459	Medtr7g085810	ERN1	23.48	18.97	20.18	13.46	11.43	7.61	20.8767	10.8333	-0.9464	3.33402e-07	1.80753e-06
Mt0053_10085	Medtr1g099840	HSP90A	3.19	5.41	3.36	0.67	0.65	1.01	3.98667	0.776667	-2.3598	8.76957e-12	7.17394e-11
Mt0036_10330	Medtr7g118170	KCS1	8.58	8.99	8.7	26	22	21.04	8.75667	23.0133	1.394	4.60927e-23	7.24243e-22
Mt0004_01134	Medtr1g076430	KCS2	24.07	35.97	30.86	59.09	67.85	67.82	30.3	64.92	1.0993	3.96066e-07	2.12907e-06
Mt0003_00837	Medtr4g070270	KCS4	114.12	131.61	128.08	264.78	282.22	289.88	124.603	278.96	1.1627	1.68081e-15	1.76094e-14
Mt0069_00009	Medtr7g081695	KCS11	11.49	9.58	10.96	5.3	5.38	4.98	10.6767	5.22	-1.0323	3.05315e-14	2.98958e-13
Mt0004_00211	Medtr1g083290	MtRbohA	199.8	295.95	288.01	356.01	362.27	513.55	261.253	410.61	0.6523	0.0149473	0.0376847
Mt0007_00482	Medtr3g098380	MtRbohB	23.33	25.26	23.75	30.49	20.59	20.02	24.1133	23.7	-0.0249	0.557439	0.765235
Mt0007_00481	Medtr3g098350	MtRbohC	1.73	0.99	1.49	83.71	77.75	72.98	1.40333	78.1467	5.7993	1.38098e-223	1.55463e-220
Mt0007_00480	Medtr3g098320	MtRbohD	6.92	8.99	7.04	23.14	19.82	23.09	7.65	22.0167	1.5251	1.14294e-16	1.29207e-15
Mt0004_11003	Medtr3g095520	MtRbohE	57.98	51.26	50.2	58.78	57.03	54.89	53.1467	56.9	0.0984	0.703669	0.876171
Mt0036_10096	Medtr7g113130	MtRbohG	521.42	701.35	588.06	1736.83	1887.74	1724.53	603.61	1783.03	1.5626	3.77511e-19	4.89027e-18
Mt0056_00093	Medtr2g043900	MtRbohH	10.31	10.71	9.4	11.03	9.19	8.74	10.14	9.65333	-0.071	0.330826	0.524415
Mt0009_00633	Medtr8g099030	MtRbohI	112.35	141.52	100.41	145.6	116.4	108.02	118.093	123.34	0.0627	0.931778	0.950768
Mt0001_01092	Medtr4g109530	MtRbohJ	16.8	13.86	15.32	17.91	17.39	17.97	15.3267	17.7567	0.2123	0.196803	0.347291
Mt0010_01118	Medtr5g099240	MtCDPK5	186.85	201.73	179.01	306.77	343.19	333.48	189.197	327.813	0.793	1.30456e-08	8.15452e-08
Mt0006_10467	Medtr3g080050	MtLYK9	22.78	20.66	22.12	52.82	57.89	57.38	21.8533	56.03	1.3583	1.27423e-28	2.59441e-27
Mt0019_10194	Medtr2g084010	Lip	6.49	7.53	9.78	55.01	81.92	103.42	7.93333	80.1167	3.3361	5.0325e-32	1.18906e-30
Mt0010_00186	Medtr5g081000	Lb	4573.54	4716.89	4747.79	185.46	194.12	231.63	4679.41	203.737	-4.5215	3.18133e-223	3.3643e-220
Mt0064_00097	Medtr4g009920	NHO1	18.76	19.23	22.68	36.63	41.39	60.91	20.2233	46.31	1.1953	1.05611e-06	5.41285e-06
Mt0087_00089	Medtr6g053290	SGT1B	93.31	88.22	84.08	198.38	192.52	191.38	88.5367	194.093	1.1324	1.49482e-37	4.29705e-36
Mt0022_10248	Medtr7g056147	RIN4	44.65	55.24	55.3	159.12	191.41	209.55	51.73	186.693	1.8516	9.69823e-22	1.42805e-20
Mt0013_00730	Medtr3g055230	RPS2	1.14	1.06	1.49	6.54	4.39	3.59	1.23	4.84	1.9763	2.21281e-10	1.61927e-09
Mt0017_10264	Medtr3g011480	RPS3	5.35	6	5.82	23.95	24.03	20.28	5.72333	22.7533	1.9912	9.25908e-38	2.6793e-36
Mt0039_10068	Medtr1g090690	RPP13	1.14	1.02	1.01	8.06	4.61	3.18	1.05667	5.28333	2.3219	3.62168e-10	2.6006e-09
Mt0004_10695	Medtr1g064090	PAL	101.65	126.75	108.52	848.89	991.02	900.53	112.307	913.48	3.0239	8.48475e-78	7.10074e-76
Mt0046_00076	Medtr8g028565	WRKY22	1.93	2.89	3.33	24.11	24.46	36.57	2.71667	28.38	3.385	6.49717e-33	1.58116e-31
Mt0009_00626	Medtr8g098945	WRKY29-like	5.07	7.49	6.34	22.09	29.68	43.35	6.3	31.7067	2.3314	1.11084e-14	1.11557e-13
Mt0026_10211	Medtr7g071120	WRKY33	186.38	115.53	154.22	337.26	385.47	219.07	152.043	313.933	1.046	1.53178e-05	6.67285e-05
Mt0013_00226	Medtr3g031220	WRKY33-like	22.38	17.37	20.94	150.55	223.37	187.07	20.23	186.997	3.2084	1.07951e-62	6.2269e-61
Mt0001_10319	Medtr4g128750	PR1	16.13	8.52	13.38	22.06	35.37	24.33	12.6767	27.2533	1.1043	5.59032e-05	0.000223728
Mt0018_00455	Medtr2g035150	PR10	47.8	51.18	64.14	259.52	216.7	232.09	54.3733	236.103	2.1184	2.77239e-38	8.15775e-37
Mt0002_00419	Medtr1g016780	VPE	178.71	113.48	155.19	600.8	803.08	807.91	149.127	737.263	2.3056	8.63221e-30	1.85269e-28
Mt0005_01158	Medtr5g027860	R (CC-NBS-LRR class)	14.79	11.15	13.9	34.77	43.33	38.77	13.28	38.9567	1.5526	7.86559e-21	1.10594e-19
Mt0034_10041	Medtr8g470390	R (TIR-NBS-LRR class)	0.35	0.37	0.38	1.99	3.38	5.12	0.366667	3.49667	3.2534	6.43923e-12	5.31971e-11
Mt0063_00039	Medtr5g076170	NDR1	16.68	11.3	14.94	64.75	94.95	69.94	14.3067	76.5467	2.4197	6.67134e-31	1.49721e-29
Mt0011_10721	Medtr7g079720	PIN9	42.52	49.9	46.04	2.06	1.35	0.72	46.1533	1.37667	-5.0672	1.78611e-79	1.55054e-77
Mt0006_10188	Medtr3g086320	NPL-like	20.97	7.06	10.78	4.25	5.99	2.03	12.9367	4.09	-1.6613	5.84505e-05	0.000233121
Mt0024_10162	Medtr6g086170	SST1-like	2122.22	2242.5	2490.34	151.7	154.75	167.39	2285.02	157.947	-3.8547	2.85751e-189	1.53418e-186
Mt0086_10022	Medtr7g063220	RSD	80.56	63.94	75.44	19.16	21.23	18.52	73.3133	19.6367	-1.9005	5.39299e-57	2.71188e-55
Mt0006_00443	Medtr3g079850	SymCRK	697.34	656.02	717.35	107.35	106.54	94.42	690.237	102.77	-2.7477	3.91825e-190	2.13655e-187
Mt0001_01904	Medtr4g094335	SEN1-like	254.95	221.66	228	68.9	77.28	70.95	234.87	72.3767	-1.6983	4.28067e-63	2.48151e-61
Mt0054_10215	Medtr6g463200	NCR001	2531.14	3070.01	3403.79	95.55	114.13	140.05	3001.65	116.577	-4.6864	2.34493e-113	3.77113e-111
Mt0022_00461	Medtr7g051290	NCR035	25.18	20.25	38.1	1.59	1.75	2.78	27.8433	2.04	-3.7707	5.70768e-36	1.54889e-34
